# Supplementary material for: Global, regional, and national under-5 mortality, adult mortality, age-specific mortality, and life expectancy, 1970–2016: a systematic analysis for the Global Burden of Disease Study 2016
Source: PubMed Central journal article supplement (PMC5605514; doi:10.1016/s0140-6736(17)31833-0), 2017-09-16
Supplement: mmc1.pdf [file mmc1.pdf]

# THE LANCET

## Supplementary appendix

This appendix formed part of the original submission and has been peer reviewed.  
We post it as supplied by the authors.

Supplement to: GBD 2016 Mortality Collaborators. Global, regional, and national under-5 mortality, adult mortality, age-specific mortality, and life expectancy, 1970–2016: a systematic analysis for the Global Burden of Disease Study 2016. *Lancet* 2017; **390**: 1084–150.

1 [Appendix to “Global, regional, and national life expectancy and all-cause](#)  
2 [mortality, 1970-2016: a systematic review for the Global Burden of Disease Study](#)  
3 [2016”](#)  
4

5 This appendix provides further methodological detail, supplemental figures, and more detailed results  
6 for “Global, regional, and national life expectancy and all-cause mortality, 1970-2016: a systematic  
7 review for the Global Burden of Disease Study 2016.” This appendix is organized into sections that  
8 follow the structure of the main paper.

9 [Preamble](#)

10 This appendix provides further methodological detail and more detailed results for “Global, regional,  
11 and national life expectancy and all-cause mortality, 1970-2016: a systematic review for the Global  
12 Burden of Disease Study 2016.” This study complies with the Guidelines for Accurate and Transparent  
13 Health Estimates Reporting (GATHER) recommendations. It includes detailed tables and information on  
14 data in an effort to maximize transparency in our estimation processes and provide a comprehensive  
15 description of analytical steps. We intend this appendix to be a living document, to be updated with  
16 each iteration of the Global Burden of Disease Study.

|    |                                                                                         |    |
|----|-----------------------------------------------------------------------------------------|----|
| 1  | <b>Table of Contents</b>                                                                |    |
| 2  | <b>Author Contributions</b> .....                                                       | i  |
| 3  | <b>Section 1: GBD Overview</b> .....                                                    | 4  |
| 4  | 1.1 Geographic locations of analysis.....                                               | 4  |
| 5  | 1.2 Time period of analysis.....                                                        | 4  |
| 6  | 1.3 Statement of GATHER compliance.....                                                 | 4  |
| 7  | 1.4 List of abbreviations.....                                                          | 4  |
| 8  | 1.5 GBD results overview.....                                                           | 5  |
| 9  | 1.6 Data input sources overview.....                                                    | 6  |
| 10 | 1.7 Funding sources.....                                                                | 6  |
| 11 | <b>Section 2: GBD 2016 All-Cause Mortality and HIV Estimation Process</b> .....         | 7  |
| 12 | 2.1 Overview.....                                                                       | 7  |
| 13 | 2.2 Child mortality.....                                                                | 7  |
| 14 | 2.3 Stillbirth estimation.....                                                          | 21 |
| 15 | 2.4 Adult mortality.....                                                                | 24 |
| 16 | 2.5 Model life table system.....                                                        | 38 |
| 17 | 2.6 HIV/AIDS estimation.....                                                            | 46 |
| 18 | 2.7 Age-specific mortality estimation for all GBD age-groups: with and without HIV..... | 51 |
| 19 | <b>Section 3: Fertility and Birth Estimation Methods</b> .....                          | 53 |
| 20 | 3.1 Input data.....                                                                     | 53 |
| 21 | 3.2 Modeling strategy.....                                                              | 53 |
| 22 | <b>Section 4: Socio-demographic Index (SDI) Analysis</b> .....                          | 55 |
| 23 | 4.1 Case definition.....                                                                | 55 |
| 24 | 4.2 Modeling strategy.....                                                              | 55 |
| 25 | 4.3 Age-sex-specific relationships between SDI and death rates.....                     | 56 |
| 26 | 4.4 SDI quintiles.....                                                                  | 57 |
| 27 | <b>Section 5: Fatal Discontinuities Estimation</b> .....                                | 58 |
| 28 | 5.1 Input data.....                                                                     | 58 |
| 29 | 5.2 Modeling strategy.....                                                              | 60 |
| 30 | <b>Section 6: Additional Methods Information</b> .....                                  | 61 |
| 31 | 6.1 Creation of the GBD world population standard.....                                  | 61 |
| 32 | 6.2 Generating population estimates in older age groups.....                            | 61 |
| 33 | 6.3 Special population definitions.....                                                 | 61 |
| 34 | 6.4 Estimating correlation.....                                                         | 62 |
| 35 | 6.5 Calculating annualised rates of change.....                                         | 62 |
| 36 | 6.6 Causes of death data star rating calculation.....                                   | 62 |
| 37 | <b>Section 7: References</b> .....                                                      | 65 |
| 38 | <b>Section 8: Figures and Tables</b> .....                                              | 68 |
| 39 |                                                                                         |    |

1 **List of Appendix Figures and Tables**

2 **Appendix Figure 1.** Components of GBD 2016 all-cause mortality and HIV estimation and their relations

3 **Appendix Figure 2.** Sibling history correction for zero-survivorship, by sex

4 **Appendix Figure 3.** Comparison of life expectancy at birth by location in GBD 2015 vs GBD 2016

5 **Appendix Figure 4.** Comparison of estimates of under-5 mortality from GBD 2016 and IGME 2015 for all  
6 countries included in both analyses, 2015

7 **Appendix Figure 5.** Ratio of stillbirth rates to neonatal mortality rates by GBD super region, 1970-2016

8 **Appendix Figure 6.** Comparison of stillbirth rates from GBD 2016 and SEIG for all countries included in  
9 both analyses, 2015

10 **Appendix Figure 7.** Ratio of estimated number of live births by location between GBD 2016 and UN  
11 Population Division, 1970, 1980, 1990, 2000, 2016

12 **Appendix Figure 8.** Estimated completeness of death registration, 1970-1989

13 **Appendix Table 1.** GATHER checklist of information that should be included in reports of global health  
14 estimates, with description of compliance and location of information for GBD 2016 mortality capstone

15 **Appendix Table 2.** Distribution of empirical life tables by GBD super-region and decade, 1950-2016

16 **Appendix Table 3.** GBD 2016 geography hierarchy with levels

17 **Appendix Table 4.** Socio-demographic Index groupings by geography, based on 2016 values

18 **Appendix Table 5.** Socio-demographic Index values by location and year

19 **Appendix Table 6.** GBD world population age standard

20 **Appendix Table 7.** Number of all-cause mortality data sources by type and location, 1950-2016

21 **Appendix Table 8.** Number of all-cause mortality data sources by type and year, 1950-2016

22 **Appendix Table 9.** Life expectancy at birth in 2015 from UN, WHO, census, and GBD 2016

23 **Appendix Table 10.** Under-5 mortality reference sources by source date and location, 1950-2016

24 **Appendix Table 11, A-C.** Under-5 mortality rates by location, sex, and year for 1970, 1975, 1980, 1985,  
25 1990, 1995, 2000, 2005, 2010, 2016

26 **Appendix Table 12, A-C.** Under-5 death numbers by location, sex, and year for 1970, 1975, 1980, 1985,  
27 1990, 1995, 2000, 2005, 2010, 2016

28 **Appendix Table 13, A-C.** Estimates of life expectancy at birth by location, sex, and year for 1970, 1975,  
29 1980, 1985, 1990, 1995, 2000, 2005, 2010, 2016

30 **Appendix Table 14, A-C.** Estimates of life expectancy at age 65 by location, sex, and year for 1970, 1975,  
31 1980, 1985, 1990, 1995, 2000, 2005, 2010, 2016

32 **Appendix Table 15, A-C.** Live births (in thousands) by location, sex, and year for 1970, 1975, 1980, 1985,  
33 1990, 1995, 2000, 2005, 2010, 2016

34 **Appendix Table 16, A-C.** Under-5 population (in thousands) by location, sex, and year for 1970, 1975,  
35 1980, 1985, 1990, 1995, 2000, 2005, 2010, 2016

36 **Appendix Table 17, A-D.** Stillbirth rates (per 1,000 live births) by location, 1970-1979, 1980-1995, 1996-  
37 2005, 2006-2016

38 **Appendix Table 18, A-D.** Stillbirths (in thousands) by location, for 1980-1995, 1996-2005, 2006-2016

39 **Appendix Table 19, A-C.** Age-standardised mortality rates by location, sex, and year for 1970, 1975,  
40 1980, 1985, 1990, 1995, 2000, 2005, 2010, 2016

1 **Authors' Contributions**

2

3 **Managing the estimation process**

4 Ryan Barber, Blair Bumgarner, Austin Carter, Dirk Douwes-Schultz, Tahvi Frank, Maya Fraser, Joseph  
5 Friedman, Emmanuela Gakidou, Fei He, Xie Rachel Kulikoff, Michael Kutz, Christopher Murray, Mohsen  
6 Naghavi, Grant Nguyen, Amber Sligar, Vinay Srinivasan, Alexander Thompson, and Haidong Wang.

7 **Writing the first draft of the manuscript**

8 Laurie B Marczak, Christopher J L Murray, and Haidong Wang.

9 **Providing data or critical feedback on data sources**

10 Cristiana Abbafati, Semaw Ferede Abera, Niveen M E Abu -Rmeileh, Laith J Abu-Raddad, Isaac Akinkunmi  
11 Adedeji, Rufus Adesoji Adesoji Adedoyin, Ifedayo Morayo O Adetifa, Olatunji Adetokunboh, Ashkan  
12 Afshin, Rakesh Aggarwal, Sutapa Agrawal, Aliasghar Ahmad Kiadaliri, Muktar Beshir Ahmed, Amani  
13 Nidhal Aichour, Ibtihel Aichour, Miloud Taki Eddine Aichour, Tomi F Akinyemiju, Nadia Akseer, Fares  
14 Alahdab, Khurshid Alam, Deena Alasfoor, Robert William Aldridge, Ayman Al-Eyadhy, Samia Alhabib,  
15 Raghieb Ali, Ala'a Alkerwi, François Alla, Peter Allebeck, Ubai Alsharif, Khalid A Altirkawi, Azmeraw T  
16 Amare, Erfan Amini, Walid Ammar, Nahla Anber, Catalina Liliana Andrei, Hossein Ansari, Carl Abelardo T  
17 Antonio, Palwasha Anwari, Al Artaman, Krishna Kumar Aryal, Hamid Asayesh, Solomon Weldegebreal  
18 Asgedom, Rana Jawad Ashgar, Ashish Awasthi, Kalpana Balakrishnan, Aleksandra Barac, Miguel A  
19 Barboza, Till Bärnighausen, Simon Barquera, Lars Barregard, Lope H Barrero, Neeraj Bedi, Yannick Béjot,  
20 Bayu Begashaw Bekele, Derrick A Bennett, James R Bennett, Isabela M Bensenor, Mircea Beuran, Addisu  
21 Shunu Beyene, Anil Bhansali, Boris Bikbov, Charles Birungi, Donal Bisanzio, Dube Jara Boneya, Rupert R A  
22 Boourne, Lemma Negesa Bulto Bulto, Lucero Cahuana-Hurtado, Mate Car, Juan Jesus Carrero, Carlos A  
23 Castañeda-Orjuela, Franz F Castro, Ferrán Catalá-López, Honglei Chen, Peggy Pei-Chia Pei-Chia Chiang,  
24 Mirriam Chibalabala, Abdulaal A Chitheer, Jee-Young J Choi, Michael H Criqui, Lalit Dandona, Rakhi  
25 Dandona, Paul I Dargan, José das Neves, Gail Davey, Kebede Deribe, Amare Deribew, Subhojit Dey,  
26 Samath D Dharmaratne, Cesar Diaz-Torne, Priyanka Dixit, Shirin Djalalinia, Christl Ann Donnelly, Dirk  
27 Douwes-Schultz, Tim R Driscoll, Manisha Dubey, Laxmi Kant Dwivedi, Charbel El Bcheraoui, Sergey  
28 Petrovich Ermakov, Babak Eshрати, Sharareh Eskandarieh, Alireza Esteghamati, Fanuel Belayneh Bekele  
29 Fanuel, Andre Faro, Farshad Farzadfar, Valery L Feigin, Seyed-Mohammad Fereshtehnejad, João C  
30 Fernandes, Tesfaye R Regassa Feyissa, Irina Filip, Florian Fischer, Richard C Franklin, Nancy Fullman,  
31 Thomas Fürst, João M Furtado, Neal D Futran, Ketevan Gambashidze, Fortuné Gbètoho Gankpé,  
32 Gebremedhin Berhe Gebregergs, Tsegaye Tewelde Gebrehiwot, Johanna M Geleijnse, Hailay Abrha  
33 Gesesew, Peter Gething, Katherine B Gibney, Beatriz Gomez, Philimon Gona, Harish Cahnder Gughani,  
34 Prakash Gupta, Nima Hafezi-Nejad, Yara A Halasa-Rappel, Mitiku Teshome Hambisa, Graeme J Hankey,  
35 Hilda L Harb, Habtamu Abera Hareri, Josep Maria Haro, Mohammad Sadegh Hassanvand, Rasmus  
36 Havmoeller, Roderick J Hay, Simon I Hay, Ileana Beatriz Heredia-Pi, Hans W Hoek, Nobuyuki Horita, H  
37 Dean Hosgood, Damian G Hoy, Aung Soe Htet, Guoqing Hu, John J Huang, Kim Moesgaard Iburg,  
38 Ehimario Uche Igumbor, Bogdan Vasile Ileanu, Manami Inoue, Asnake Ararsa Irenso, Kathryn H  
39 Jacobsen, Mihajlo B Jakovljevic, Mehdi Javanbakht, Panniyammakal Jeemon, Paul N Jensen, Sarah  
40 Charlotte Johnson, Jost B Jonas, Mikk Jürisson, Zubair Kabir, Rajendra Kadel, Ritul Kamal, Haidong Kan,  
41 André Karch, Corine Kakizi Karema, Seyed M Karimi, Amir Kasaeian, Nicholas J Kassebaum, Srinivasa  
42 Vittal Katikireddi, Anil Kaul, Norito Kawakami, Konstantin Kazanjan, Andre Keren, Maia Kereselidze,

1 Chandrasekharan Nair Kesavachandran, Yousef Saleh Khader, Ibrahim A Khalil, Abdullah Tawfih Abdullah  
2 Khoja, Christian Kieling, Yun Jin Kim, Ruth W Kimokoti, Yohannes Kinfu, Mika Kivimaki, Yoshihiro Kokubo,  
3 Soewarta Kosen, Parvaiz A Koul, Michael Kravchenko, Kristopher J Krohn, Barthelemy Kuate Defo, Burcu  
4 Kucuk Bicer, G Anil Kumar, Pushpendra Kumar, Carl Lachat, Anton Carl Jonas Lager, Dharmesh Kumar  
5 Lal, Nkurunziza Lambert, Qing Lan, Anders Larsson, James Leigh, Janni Leung, Ricky Leung, Miriam Levi,  
6 Misgan Legesse Liben, Shiwei Liu, Giancarlo Logroscino, Alan D Lopez, Stefan Lorkowski, Stefan Ma,  
7 Carlos Magis-Rodriguez, Marek Majdan, Azeem Majeed, Reza Malekzadeh, Lorenzo G Mantovani,  
8 Tsegahun Manyazewal, Guy B Marks, Mohsen Mazidi, Colm McAlinden, John J McGrath, Suresh Mehata,  
9 Tefera Chane Mekonnen, Kidanu Gebremariam Meles, Ziad A Memish, Walter Mendoza, Melkamu  
10 Merid Mengesha, Desalegn Tadesse Mengistu, Bereket Gebremichael Menota, Atte Meretoja, Tuomo J  
11 Meretoja, Haftay Berhane Mezgebe, Ted R Miller, Shiva Raj Mishra, Shafiu Mohammed, Sanjay K  
12 Mohanty, Ali H Mokdad, Mariam Molokhia, Lorenzo Monasta, Meghan D Mooney, Ami R Moore, Maziar  
13 Moradi-Lakeh, Ilais Moreno Velasquez, Rintaro Mori, Ulrich O Mueller, Christopher J L Murray, Kamarul  
14 Imran Musa, Jean B Nachega, Gabriele Nagel, Mohsen Naghavi, Bruno Ramos Nascimento, Ionut Negoii,  
15 Marika Nomura, Bo Norrving, Luke Nyakarahuka, Felix Akpojene Ogbo, Olanrewaju Oladimeji, Andrew  
16 Toyin Olagunju, Bolajoko Olubukunola Olusanya, Jacob Olusegun Olusanya, Alberto Ortiz, Mayowa O  
17 Owolabi, Mahesh PA, Smita Pakhale, Adrian Pana, Songhomitra Panda-Jonas, Scott Patten, Deepak  
18 Paudel, David M Pereira, Fernando Perez-Ruiz, Norberto Perico, William Arthur Petri, Frédéric B Piel,  
19 David M Pigott, Dietrich Plass, Suzanne Polinder, Svetlana Popova, Farshad Pourmalek, Narayan Prasad,  
20 Mostafa Qorbani, Rynaz H S Rabiee, Amir Radfar, Anwar Rafay, Afarin Rahimi-Movaghar, Vafa Rahimi-  
21 Movaghar, Mahfuzar Rahman, Rajesh Kumar Rai, Sasa Rajsic, Usha Ram, Chhabi Lal Ranabhat, Salman  
22 Rawaf, Jürgen Rehm, Giuseppe Remuzzi, Mohammad Sadegh Rezai, Antonio Luiz Ribeiro, Luca Ronfani,  
23 Gholamreza Roshandel, Gregory A Roth, Dietrich Rothenbacher, Ambuj Roy, George Mugambage  
24 Ruhago, Soheil Saadat, Nafis Sadat, Saeid Safiri, Mohammad Ali Sahraian, Payman Salamati, Abdallah M  
25 Samy, Itamar S Santos, Milena Santric Milicevic, Benn Sartorius, Maheswar Satpathy, Monika Sawhney,  
26 Sonia Saxena, Mete I Saylan, Falk Schwendicke, Soraya Seedat, Sadaf G Sepanlou, Edson E Servan-Mori,  
27 Saeid Shahrzad, Masood Ali Ali Shaikh, Marina Shakhnazarova, Morteza Shamsizadeh, Sheikh Mohammed  
28 Shariful Islam, Jayendra Sharma, Jiabin Shen, Peilin Shi, Kenji Shibuya, Mark G Shrimme, Diego Augusto  
29 Santos Silva, Abhishek Singh, Jasvinder Singh, Virendra Singh, Badr H A Sobaih, Eugene Sobngwi,  
30 Chandrashekhar T Sreeramareddy, Vasiliki Stathopoulou, Heidi Stöckl, Mark Andrew Stokes, Muawiyah  
31 Babale Sufiyan, Rizwan Abdulkader Suliankatchi, Patrick J Sur, Bryan L Sykes, Cassandra E I Szoeki,  
32 Rafael Tabarés-Seisdedos, David Tanne, Musharaf Tarajia, Mohammad Tavakkoli, Nuno Taveira, Girma  
33 Temam Shifa, Mohamad-Hani Tamsah, Abdullah Sulieman Terkawi, Andrew Theis, Amanda G Thrift,  
34 Ruoyan Tobe-Gai, Marcello Tonelli, Bach Xuan Tran, Thomas Truelsen, Kingsley Nnanna Ukwaja, Eduardo  
35 Undurraga, Job FM van Boven, Yurii Y Varakin, Santosh Varughese, Tommi Vasankari, Ana Maria Nogales  
36 Vasconcelos, Narayanaswamy Venketasubramanian, Ramesh Vidavalur, Francesco S Violante, Vasiliy  
37 Victorovich Vlassov, Stein Emil Vollset, Tolassa Wakayo, Haidong Wang, Yuan-Pang Wang, Elisabete  
38 Weiderpass, Robert G Weintraub, Andrea Werdecker, Tissa Wijeratne, Charles Shey Wiysonge, Charles D  
39 A Wolfe, Abdulhalik Workicho, Denis Xavier, Gelin Xu, Bereket Yakob, Lijing L Yan, Pengpeng Ye, Hassen  
40 Hamid Yimam, Biruck Desalegn Yirsaw, Naohiro Yonemoto, Marcel Yotebieng, Mustafa Z Younis, Zoubida  
41 Zaidi, Anthony Lin Zhang, Xueying Zhang, Sanjay Zodpey, and Liesl Joanna Zuhlke.

#### 42 [Developing methods or computational machinery](#)

43 Ashkan Afshin, Dina Nur Anggraini Ningrum, Megha Arora, Solomon Weldegebreal Asgedom, James R  
44 Bennett, Stan Biryukov, Donal Bisanzio, Dube Jara Boneya, Lemma Negesa Bulto Bulto, Austin Carter,

1 Paul Dargan, Charbel El Bcheraoui, Babak Eshrati, Kyle J Foreman, Tahvi Frank, Maya Fraser, Joseph  
2 Friedman, Joseph J Frostad, Emmanuela Gakidou, Nicholas Graetz, Hassen Hamid Yimam, Xie Rachel  
3 Kulikoff, Michael Kutz, Ali H Mokdad, Christopher J L Murray, Mohsen Naghavi, Grant Nguyen, Aaron  
4 Osgood-Zimmerman, Robert Reiner, Enrico Rubagotti, Maheswar Satpathy, Naris Silpakit, David L Smith,  
5 Vinay Srinivasan, Alexander H Thompson, and Haidong Wang.

#### 6 [Applying analytical methods to produce estimates](#)

7 Ashkan Afshin, Muktar Beshir Ahmed, Fares Alahdab, Azmeraw T Amare, Nahla Anber, Hossein Ansari,  
8 Mustafa Geleto Ansha, Solomon Weldegebreal Asgedom, Ryan M Barber, Adugnaw Berhane, Donal  
9 Bisanzio, Dube Jara Boneya, Lemma Negesa Bulto Bulto, Austin Carter, Elizabeth A Cromwell, Dirk  
10 Douwes-Schultz, Charbel El Bcheraoui, Aman Yesuf Endries, Babak Eshrati, Tahvi Frank, Maya Fraser,  
11 Joseph Friedman, Joseph J Frostad, Fei He, Bogdan Vasile Ileanu, Caleb M S Irvine, Yun Jin Kim, Xie  
12 Rachel Kulikoff, Qing Lan, Janni Leung, Misgan Kegesse Liben, Joseph Mikesell, Ali H Mokdad, Sarah K  
13 Mollenkopf, Christopher J L Murray, Mohsen Naghavi, Grant Nguyen, Dina Nur Anggraini Ningrum, Felix  
14 Akopjene Ogbo, Olanrewaju Oladimeji, Sarah E Ray, Robert Reiner, Mohammad Sadegh Rezai, Gregory A  
15 Roth, Enrico Rubagotti, Maheswar Satpathy, Vinay Srinivasan, Alexander H Thompson, Kingsley Nnanna  
16 Ukwaja, Tolassa Wakayo, Haidong Wang, Tissa Wijeratne, Hassen Hamid Yimam, and Mustafa Z Younis.

#### 17 [Providing critical feedback on methods or results](#)

18 Amanuel Alemu Abajobir, Kalkidan Hassen Abate, Cristiana Abbafati, Kaja M Abbas, Semaw Ferede  
19 Abera, Haftom Niguse Abraha, Niveen M E Abu-Rmeileh, Isaac Akinkunmi Adedeji, Rufus Adesoji  
20 Adedoyin, Ifedayo Morayo O Adetifa, Olatunji Adetokunboh, Ashkan Afshin, Anurag Agrawal, Sutapa  
21 Agrawal, Aliasghar Ahmad Kiadaliri, Muktar Beshir Ahmed, Amani Nidhal Aichour, Ibtihel Aichour,  
22 Miloud Taki Eddine Aichour, Ali Shafqat Akanda, Tomi F Akinyemiju, Nadia Akseer, Faris Hasan Al Lami,  
23 Samer Alabed, Fares Alahdab, Ziyad Al-Aly, Khurshid Alam, Noore Alam, Deena Alasfoor, Robert William  
24 Aldridge, Kefyalew Addis Alene, Raghieb Ali, Reza Alizadeh-Navaei, Shalini D Allam, Peter Allebeck, Ubai  
25 Alsharif, Khalid A Altirkawi, Nelson Alvis-Guzman, Azmeraw T Amare, Erfan Amini, Walid Ammar, Yaw  
26 Ampem Amoako, Catalina Liliana Andrei, Sofia Androudi, Mustafa Geleto Ansha, Carl Abelardo T  
27 Antonio, Palwasha Anwari, Johan Årnlöv, Megha Arora, Al Artaman, Krishna Kumar Aryal, Hamid  
28 Asayesh, Solomon Weldegebreal Asgedom, Rana Jawad Asghar, Reza Assadi, Tesfay Mehari Atey, Sachin  
29 R Atre, Leticia Avila-Burgos, Euripide Frinel G Arthur Avokpaho, Ashish Awasthi, Beatriz Paulina Ayala  
30 Quintanilla, Tesleem Kayode Babalola, Umar Bacha, Alaa Badawi, Aleksandra Barac, Suzanne L Barker-  
31 Collo, Till Bärnighausen, Simon Barquera, Lars Barregard, Lope H Barrero, Bernhard T Baune, Shahrzad  
32 Bazargan-Hejazi, Neeraj Bedi, Ettore Beghi, Bayu Begashaw Bekele, Michelle L Bell, Derrick A Bennett,  
33 Isabela M Bensenor, Adugnaw Berhane, Derbew Fikadu Berhe, Eduardo Bernabe, Mircea Beuran, Addisu  
34 Shunu Shunu Beyene, Neeraj Bhala, Zulfiqar A Bhutta, Boris Bikbov, Charles Birungi, Donal Bisanzio,  
35 Christopher D Blosser, Dube Jara Boneya, Rupert R A Bourne, Nicholas J K Breitborde, Hermann  
36 Brenner, Gene Bukhman, Lemma Negesa Bulto Bulto, Zahid A Butt, Leah E Cahill, Ismael Ricardo  
37 Campos-Nonato, Mate Car, Rosario Cárdenas, David O Carpenter, Austin Carter, Carlos A Castañeda-  
38 Orjuela, Jacqueline Castillo-Rivas, Ferrán Catalá-López, Piggy Pei-Chia Chiang, Vesper Hichilombwe  
39 Chisumpa, Jee-Young J Choi, Hanne Christensen, Liliana G Ciobanu, Aaron J Cohen, Samantha M  
40 Colquhoun, Michael H Criqui, Elizabeth A Cromwell, John A Crump, Lalit Dandona, Rakhi Dandona, José  
41 das Neves, Kairat Davletov, Barbora de Courten, Diego De Leo, Louisa Degenhardt, Kebede Deribe,  
42 Amare Deribew, Subhojit Dey, Samath D Dharmaratne, Shirin Djalalinia, Huyen Phuc Do, David T Doku,  
43 Kadine Priscila Bender dos Santos, Dirk Douwes-Schultz, Tim R Driscoll, Manisha Dubey, Charbel El

1 Bcheraoui, Christian Lycke Lyche Ellingsen, Ahdalima Enayati, Aman Yesuf Endries, Setegn Eshetie, Babak  
2 Eshрати, Sharareh Eskandarieh, Alireza Esteghamati, Fanuel Belayneh Bekele Fanuel, André Faro, Farshad  
3 Farzadfar, Seyed-Mohammad Fereshtehnejad, Joao C Fernandes, Tesfaye Regassa Feyissa, Irina Filip,  
4 Florian Fischer, Nataliya Foigt, Kyle J Foreman, Richard C Franklin, Nancy Fullman, Thomas Fürst, João M  
5 Furtado, Neal D Futran, Emmanuela Gakidou, Ketevan Gambashidze, Amiran Gamkrelidze, Alberto L  
6 García-Basteiro, Gebremedhin Berhe Gebregergs, Tsegaye Tewelde Gebrehiwot, Mengistu Welday  
7 Gebremichael, Hailay Abrha Gesesew, Peter W Gething, Katherine B Gibney, Richard F Gillum, Bedilu  
8 Weji Girma, Giorgia Giussani, Philimon N Gona, Sameer Vali Gopalani, Alessandra Carvalho Goulart,  
9 Harish Chander Gugnani, Prakash C Gupta, Rajeev Gupta, Tanush Gupta, Vipin Gupta, Nima Hafezi-  
10 Nejad, Hassan Haghparast-Bidgoli, Alex Hakuzimana, Randah Ribhi Hamadeh, Mitiku Teshome Hambisa,  
11 Samer Hamidi, Yuantao Hao, Hilda L Harb, Habtamu Abera Hareri, Josep Maria Haro, Rasmus  
12 Havmoeller, Roderick Hay, Simon I Hay, Fei He, Ileana Beatriz Heredia-Pi, Nobuyuki Horita, H Dean  
13 Hosgood, Sorin Hostiuc, Damian G Hoy, Mohamed Hsairi, Aung Soe Htet, Guoqing Hu, Hsiang Huang,  
14 John J Huang, Kim Moesgaard Iburg, Ehimario Uche Igumbor, Manami Inoue, Asnake Ararsa Irenso,  
15 Kathryn H Jacobsen, Nader Jahanmehr, Mihajlo B Jakovljevic, Mehdi Javanbakht, Panniyammakal  
16 Jeemon, Paul N Jensen, Vivekanand Jha, Denny John, Oommen John, Jost B Jonas, Mikk Jürisson,  
17 Rajendra Kadel, Amaha Kahsay, Yogeshwar Kalkonde, Ritul Kamal, André Karch, Seyed M Karimi, Amir  
18 Kasaeian, Nigussie Assefa Kassaw, Nicholas J Kassebaum, Anshul Kastor, Srinivasa Vittal Katikireddi,  
19 Norito Kawakami, Konstantin Kazanjan, Peter Njenga Keiyoro, Andre Keren, Maia Kereselidze,  
20 Chandrasekharan Nair Kesavachandran, Ezra Belay Ketema, Yousef Saleh Khader, Young-Ho Khang, Sahil  
21 Khera, Mohammad Hossein Khosravi, Getiye Dejenu Kibret, Daniel Kim, Pauline Kim, Yun Jin Kim, Ruth W  
22 Kimokoti, Yohannes Kinfu, Sami Kishawi, Katarzyna A Kissimova-Skarbek, Niranjan Kisson, Mika Kivimaki, Ann  
23 Kristin Knudsen, Jacek A Kopec, Parvaiz A Koul, Ai Koyanagi, Michael Kravchenko, Kristopher J Krohn,  
24 Barthelemy Kuate Defo, Ernst J Kuipers, G Anil Kumar, Pushpendra Kumar, Michael Kutz, Anton Carl  
25 Jonas Lager, Dharmesh Kumar Lal, Nkurunziza Lambert, Qing Lan, Van C Lansingh, Anders Larsson,  
26 Dennis Odai Laryea, Pablo M Lavados, Avula Laxmaiah, Paul H Lee, James Leigh, Janni Leung, Miriam  
27 Levi, Yongmei Li, Misgan Legesse Liben, Shai Linn, Rakesh Lodha, Alan D Lopez, Scott A Lorch, Stefan  
28 Lorkowski, Paulo A Lotufo, Ronan A Lyons, Eryln Rachelle King Macarayan, Mahdi Mahdavi, Marek  
29 Majdan, Azeem Majeed, Reza Malekzadeh, Rajesh Malhotra, Deborah Carvalho Malta, Tsegahun  
30 Manyazewal, Chabila C Mapoma, Laurie Marczak, Guy B Marks, Jose Martinez-Raga, Pallab K Maulik,  
31 Mohsen Mazidi, Colm McAlinden, Stephen Theodore McGarvey, Martin McKee, Kala M' Mehta, Toni  
32 Meier, Tefera Chane Mekonnen, Kidanu Gebremariam Meles, Peter Memiah, Walter Mendoza,  
33 Melkamu Merid Mengesha, Mubarek Abera Mengistie, Desalegn Tadese Mengistu, Bereket  
34 Gebremichael Menota, George A Mensah, Atte Meretoja, Tuomo J Meretoja, Haftay Berhane Mezgebe,  
35 Joseph Mikesell, Ted R Miller, Shawn Minnig, Mojde Mirarefin, Erkin M Mirrakhimov, Shiva Raj Mishra,  
36 Karzan Abdulmuhsin Mohammad, Alireza Mohammadi, Kedir Endris Mohammed, Shafiu Mohammed,  
37 Ali H Mokdad, Sarah K Mollenkopf, Mariam Molokhia, Lorenzo G Monasta, Marcella Montico, Ami R  
38 Moore, Paula Moraga, Lidia Morawska, Kalayu Birhane Mruts, Ulrich O Mueller, Kate Muller,  
39 Christopher J L Murray, Gudlavalleti Venkata Satyanarayana Murthy, Srinivas Murthy, Kamarul Imran  
40 Musa, Jean B Nachega, Chie Nagata, Gabriele Nagel, Mohsen Naghavi, Vinay Nangia, Bruno Ramos  
41 Nascimento, Ionut Negoii, Cuong Tat Nguyen, Grant Nguyen, Quyen Le Nguyen, Trang Huyen Nguyen,  
42 Dina Nur Anggraini Ningrum, Vuong Minh Nong, Ole F Norheim, Bo Norrving, Jean Jacques N Noubiap,  
43 Felix Akpojene Ogbo, Anselm Okoro, Olanrewaju Oladimeji, Andrew Toyin Olagunju, Bolajoko  
44 Olubukunola Olusanya, Jacob Olusegun Olusanya, Eyal Oren, Alberto Ortiz, Erika Ota, Mayowa O



1 Owolabi, Mahesh PA, Smita Pakhale, Adrian Pana, Basant Kumar Panda, Songhomitra Panda-Jonas, Eun-  
2 Kee Park, George C Patton, Deepak Paudel, David M Pereira, Fernando Perez-Ruiz, Norberto Perico,  
3 Aslam Pervaiz, Konrad Pesudovs, Carrie Beth Peterson, Michael Robert Phillips, Frédéric B Piel, David M  
4 Pigott, Dietrich Plass, Suzanne Polinder, Maarten J Postma, Richie G Poulton, Farshad Pourmalek,  
5 Narayan Prasad, Mostafa Qorbani, Amir Radfar, Afarin Rahimi-Movaghar, Vafa Rahimi-Movaghar,  
6 Mahfuzar Rahman, Mohammad Hifz Ur Rahman, Rajesh Kumar Rai, Sasa Rajsic, Usha Ram, Chhabi Lal Lal  
7 Ranabhat, Salman Rawaf, Sarah E Ray, Maria Albertina Santiago Rego, Jürgen Rehm, Robert Reiner,  
8 Giuseppe Remuzzi, Andre M N Renzaho, Serge Resnikoff, Satar Rezaei, Mohammad Sadegh Rezaei,  
9 Antonio L Ribeiro, Luca Ronfani, Gholamreza Roshandel, Gregory A Roth, Dietrich Rothenbacher, Ambuj  
10 Roy, George Mugambage Ruhago, Yogesh Damodar Sabde, Perminder S Sachdev, Mahdi Safdarian, Saeid  
11 Safiri, Rajesh Sagar, Mohammad Ali Sahraian, Payman Salamati, Joshua A Salomon, Abdallah M. M Samy,  
12 Maria Dolores Sanchez-Niño, Itamar S Santos, Milena M Santric Milicevic, Rodrigo Sarmiento-Suarez,  
13 Benn Sartorius, Maheswar Satpathy, Monika Sawhney, Sonia Saxena, Mete I Saylan, Ione J C Schneider,  
14 Aletta E Schutte, David C Schwebel, Falk Schwendicke, Abdulbasit Musa Seid, Sadaf G Sepanlou, Amira  
15 Shaheen, Saeid Shahraz, Masood Ali Ali Shaikh, Marina Shakhnazarova, Mansour Shamsipour, Morteza  
16 Shamsizadeh, Sheikh Mohammed Shariful Islam, Jayendra Sharma, Rajesh Sharma, Jun She, Jiabin Shen,  
17 Kenji Shibuya, Mika Shigematsu, Rahman Shiri, Ivy Shiue, Mark G Shrimme, Inga Dora Sigfusdottir, Donald  
18 H Silberberg, Diego Augusto Santos Silva, Dayane Gabriele Alves Silveira, Jasvinder A Singh, Dharendra  
19 Narain Sinha, Badr H A Sobaih, Eugene Sobngwi, Samir Soneji, Chandrashekhar T Sreeramareddy,  
20 Nicholas Steel, Mark Andrew Stokes, Mark Strong, Lela Sturua, Muawiyyah Babale Sufiyan, Rizwan  
21 Abdulkader Suliankatchi, Bruno F Sunguya, Patrick J Sur, Bryan L Sykes, Cassandra E I Szoeki, Rafael  
22 Tabarés-Seisdedos, Fentaw Tadese, Nikhil Tandon, Nuno Taveira, Tesfalidet Tekelab, Girma Temam  
23 Shifa, Mohamad-Hani Temsah, Abdullah Sulieman Terkawi, Cheru Leshargie Tesema, Belay Tessema,  
24 Alexander H Thompson, Alan J Thomson, Tenaw Yimer Tiruye, Ruoyan Tobe-Gai, Marcello Tonelli,  
25 Roman Topor-Madry, Miguel Tortajada-Girbés, Bach Xuan Tran, Thomas Truelsen, Kald Beshir Tuem,  
26 Emin Murat Tuzcu, Stefanos Tyrovolas, Kingsley Nnanna Ukwaja, Eduardo A Undurraga, Olalekan A  
27 Uthman, Benjamin S C Uzochukwu, Job F M van Boven, Santosh Varughese, Tommi Vasankari, Ana Maria  
28 Nogales Vasconcelos, Narayanaswamy Venketasubramanian, Ramesh Vidavalur, Francesco S Violante,  
29 Abhishek Vishnu, Sergey K Vladimirov, Vasiliy Victorovich Vlassov, Stein Emil Vollset, Theo Vos, Tolassa  
30 Wakayo, Haidong Wang, Yuan-Pang Wang, Scitt Weichenthal, Elisabete Weiderpass, Robert G  
31 Weintraub, Andrea Werdecker, Joshua Wesana, Tissa Wijeratne, Belete Getahun Woldeyes, Charles D A  
32 Wolfe, Abdulhalik Workicho, Denis Xavier, Gelin Xu, Mohsen Yaghoubi, Bereket Yakob, Lijing L Yan,  
33 Mehdi Yaseri, Hassen Hamid Yimam, Paul Yip, Biruck Desalegn Yirsaw, Naohiro Yonemoto, Marcel  
34 Yotebieng, Mustafa Z Younis, Zoubida Zaidi, Maysaa El Sayed Zaki, Zerihun Menlkalew Zenebe, Taddese  
35 Alemu Zerfu, Anthony Lin Zhang, Sanjay Zodpey, and Liesl Joanna Zuhlke.

#### 36 [Drafting the work or revising is critically for important intellectual content](#)

37 Amanuel Alemu Abajobir, Kalkidan Hassen Abate, Cristiana Abbafati, Kaja M Abbas, Foad Abd-Allah,  
38 Semaw Ferede Abera, Isaac Akinkunmi Adedeji, Ifedayo Morayo O Adetifa, Olatunji Adetokunboh,  
39 Ashkan Afshin, Sutapa Agrawal, Aliasghar Ahmad Kiadaliri, Muktar Beshir Ahmed, Tomi F Akinyemiju,  
40 Fares Alahdab, Khurshid Alam, Noore Alam, Raghieb Ali, Ala'a Alkerwi, Shalini D Allam, Peter Allebeck,  
41 Khalid A Altirkawi, Nelson Alvis-Guzman, Azmeraw T Amare, Emmanuel A Ameh, Erfan Amini, Walid  
42 Ammar, Yaw A Ampem Amoako, Nahla Anber, Sofia Androudi, Hossein Ansari, Mustafa Geleto Ansha,  
43 Palwasha Anwari, Johan Ärnlöv, Hamid Asayesh, Solomon Weldegebreal Asgedom, Reza Assadi, Ashagre  
44 Molla Assaye, Tesfay Mehari Atey, Leticia Avila-Burgos, Ashish Awasthi, Alaa Badawi, Aleksandra Barac,

1 Suzanne L Barker-Collo, Till Bärnighausen, Lope H Barrero, Bernhard T Baune, Neeraj Bedi, Ettore Beghi,  
2 Michelle L Bell, Isabela M Bensenor, Adugnaw Berhane, Eduardo Bernabé, Mircea Beuran, Addisu Shunu  
3 Beyene, Neeraj Bhala, Donal Bisanzio, Dube Jara Boneya, Hermann Brenner, Lemma Negesa Bulto Bulto,  
4 Zahid A Butt, Lucero Cahuana-Hurtado, Josip Car, Juan Jesus Carrero, Austin Carter, Carlos A Castañeda-  
5 Orjuela, Jacqueline Castillo-Rivas, Franz F Castro, Ferrán Catalá-López, Aaron J Cohen, Michael H Criqui,  
6 John A Crump, José das Neves, Gail Davey, Dragos V Davitoiu, Barbora de Courten, Louisa Degenhardt,  
7 Selina Deiparine, Robert P Dellavalle, Kebede Deribe, Don C Des Jarlais, Subhojit Dey, Samath D  
8 Dharmaratne, Huyen Phuc Do, Tim R Driscoll, Manisha Dubey, Bruce Bartholow Duncan, Hedyeh  
9 Ebrahimi, Charbel El Bcheraoui, Aman Yesuf Endries, Babak Eshрати, Sharareh Eskandarieh, Alireza  
10 Esteghamati, André Faro, Seyed-Mohammad Fereshtehnejad, João C Fernandes, Irina Filip, Florian  
11 Fischer, Nataliya Foigt, Nancy Fullman, Thomas Fürst, João M Furtado, Emmanuela Gakidou, Amiran  
12 Gamkrelidze, Alberto L García-Basteiro, Gebremedhin Berhe Gebregergs, Tsegaye Tewelde Gebrehiwot,  
13 Johanna M Geleijnse, Hailay Abrha Gesesew, Katherine B Gibney, Richard F Gillium, Philimon N Gona,  
14 Sameer Vali Gopalani, Alessandra Goulart, Rajeev Gupta, Tanush Gupta, Nima Hafezi-Nejad, Randah  
15 Ribhi Hamadeh, Mitiku Teshome Hambisa, Alexis J Handal, Graeme J Hankey, Hilda L Harb, Josep Maria  
16 Haro, Rasmus Havmoeller, Ileana Beatriz Heredia-Pi, Esayas Haregot Hilawe, Nobuyuki Horita, H Dean  
17 Hosgood, Sorin Hostiuc, Peter J Hotez, Damian G Hoy, Hsiang Huang, Ehimario Uche Igumbor, Manami  
18 Inoue, Asnake Ararsa Irenso, Sheikh Mohammed Shariful Islam, Kathryn H Jacobsen, Mihajlo Jakovljevic,  
19 Panniyammakal Jeemon, Paul N Jensen, Devasahayam Jesudas, Vivekanand Jha, Jost B Jonas, Mikk  
20 Jürisson, Rajendra Kadel, Ritul Kamal, André Karch, Seyed M Karimi, Amir Kasaeian, Srinivasa Vittal  
21 Katikireddi, Norito Kawakami, Peter Njenga Keiyoro, Andre Pascal Kengne, Chandrasekharan Nair  
22 Kesavachandran, Yousef Saleh Khader, Ejaz Ahmad Khan, Gulfaraz Khan, Young-Ho Khang, Sahil Khera,  
23 Abdullah Tawfih Abdullah Khoja, Mohammad Hossein Khosravi, Christian Kieling, Daniel Kim, Pauline Kim,  
24 Yun Jin Kim, Sami Kishawi, Katarzyna A Kissimova-Skarbek, Niranjana Kisson, Mika B Kivimaki, Ann Kristin  
25 Knudsen, Yoshihiro Kokubo, Parvaiz A Koul, Ai Koyanagi, Kristopher J Krohn, Barthelemy Kuate Defo,  
26 Burcu Kucuk Bicer, Fekede Asefa Kumsa, Anton Carl Jonas Lager, Dharmesh Kumar Lal, Ratilal Laloo, Van  
27 C Lansingh, Anders Larsson, Dennis Odai Laryea, Pablo M Lavados, Janni Leung, Miriam Levi, Misgan  
28 Legesse Liben, Rakesh Lodha, Giancarlo Logroscino, Alan D Lopez, Scott A Lorch, Paulo A Lotufo,  
29 Raimundas Lunevicius, Isis Eloah Machado, Mohammed Magdy Abd El Razek, Carlos Magis-Rodriguez,  
30 Marek Majdan, Reza Majdzadeh, Azeem Majeed, Reza Malekzadeh, Tsegahun Manyazewal, Laurie B  
31 Marczak, Jose Martinez-Raga, Francisco Rogerlândio Martins-Melo, João Massano, Mohsen Mazidi, Colm  
32 McAlinden, John J McGrath, Suresh Mehata, Kala M Mehta, Toni Meier, Kidanu Gebremariam Meles,  
33 Ziad A Memish, Walter Mendoza, Melkamu Merid Mengesha, Desalegn Tadese Mengistu, George A  
34 Mensah, Atte Meretoja, Tuomo J Meretoja, Ted R Miller, Mubarek Abera Mingistie, Vuong Minh Minh  
35 Nong, Shiva Raj Mishra, Karzan Abdulmuhsin Mohammad, Alireza Mohammadi, Shafiu Mohammed, Ali  
36 H Mokdad, Mariam Molokhia, Lorenzo Monasta, Maziar Moradi-Lakeh, Paula Moraga, Shane D  
37 Morrison, Ulrich O Mueller, Erin Mullany, Kate Muller, Christopher J L Murray, Kamarul Imran Musa,  
38 Jean Nachega, Chie Nagata, Mohsen Naghavi, Bruno Ramos Nascimento, Ionut Negoii, Cuong Tat  
39 Nguyen, Quyen Le Nguyen, Trang Huyen Nguyen, Ole F Norheim, Bo Norrving, Jean Jacques Noubiap,  
40 Martin J O'Donnell, Felix Akpojene Ogbo, In-Hwan Oh, Anselm Okoro, Olanrewaju Oladimeji, Andrew  
41 Toyin Olagunju, Bolajoko Olubukunola Olusanya, Jacob Olusegun Olusanya, Eyal Oren, Alberto Ortiz,  
42 Erika Ota, Mayowa O Owolabi, Mahesh PA, Smita Pakhale, Basant Kumar Panda, Songhomitra Panda-  
43 Jonas, Eun-Kee Park, George C Patton, David M Pereira, Fernando Perez-Ruiz, Konrad Pesudovs, Carrie  
44 Beth Peterson, Michael Robert Phillips, Farhad Pishgar, Dietrich Plass, Maarten J Postma, Richie G

1 Poulton, Mostafa Qorbani, Amir Radfar, Anwar Rafay, Vafa Rahimi-Movaghar, Mahfuzar Rahman, Rajesh  
2 Kumar Rai, Salman Rawaf, Sarah E Ray, Robert Reiner, Andre M N Renzaho, Satar Rezaei, Mohammad  
3 Sadegh Rezai, Antonio Luiz L Ribeiro, Luca Ronfani, Gholamreza Roshandel, Dietrich Rothenbacher,  
4 Yogesh Damodar Sabde, Perminder S Sachdev, Mahdi Safdarian, Saeid Safiri, Rajesh Sagar, Joshua A  
5 Salomon, Abdallah M Samy, Maria Dolores Sanchez-Niño, Itamar S Santos, Milena M Santric Milicevic,  
6 Maheswar Satpathy, Monika Sawhney, Sonia Saxena, Mete I Saylan, Maria Inês Schmidt, Aletta E  
7 Schutte, David C Schwebel, Falk Schwendicke, Soraya Seedat, Abdulbasit Musa Seid, Sadaf G Sepanlou,  
8 Masood Ali Shaikh, Morteza Shamsizadeh, Kenji Shibuya, Girma Shifa, Mika Shigematsu, Rahman Shiri,  
9 Mark G Shrimme, Diego Augusto Santos Silva, João Pedro Silva, Jasvinder A Singh, Amber Sligar,  
10 Chandrashekhar T Sreeramareddy, Vasiliki Stathopoulou, Dan J Stein, Muawiyah Babale Sufiyan, Bryan  
11 L Sykes, Cassandra E I Szoeki, Santosh Kumar Tadakamadla, Fentaw Tadese, Nuno Taveira, Arash  
12 Tehrani-Banihashemi, Mohamad-Hani Temsah, Belay Tessema, Alan J Thomson, Amanda G Thrift,  
13 Marcello Tonelli, Roman Topor-Madry, Miguel Tortajada-Girbés, Bach Xuan Tran, Emin Murat Tuzcu,  
14 Stefanos Tyrovolas, Kingsley Nnanna Ukwaja, Eduardo A Undurraga, Olalekan A Uthman, Job F M van  
15 Boven, Tommi Vasankari, Narayanaswamy Venketasubramanian, Vasiliy Victorovich Vlassov, Stein Emil  
16 Vollset, Tolassa Wakayo, Haidong Wang, Yuan-Pang Wang, Elisabete Weiderpass, Robert G Weintraub,  
17 Andrea Werdecker, Joshua Wesana, Tissa Wijeratne, Charles Shey Wiysonge, Denis Xavier, Gelin Xu,  
18 Bereket Yakob, Lijing L Yan, Mehdi Yaseri, Hassen Hamid Yimam, Naohiro Yonemoto, Seok-Jun Yoon,  
19 Mustafa Z Younis, Zouvida Zaidi, Maysaa El Sayed Zaki, Hajo Zeeb, Zerihun Menkalew Zenebe, and Liesl  
20 Joanna Zuhlke.

#### 21 [Extracting, cleaning, or cataloging data; designing or coding figures and tables](#)

22 Olatunji Adetokunboh, Muktar Beshir Ahmed, Sneha Aiyar, Megha Arora, Solomon Weldegebreal  
23 Asgedom, Reza Assadi, Ryan M Barber, James R Bennett, Jennifer Benson, Adugnaw Berhane, Donal  
24 Bisanzio, Lemma Negesa Bulton Bulto, Austin Carter, Dirk Douwes-Schultz, Sergey Petrovich Ermakov,  
25 Tahvi Frank, Maya Fraser, Joseph J Frostad, Nancy Fullman, Jamie Hancock, Guoqing Hu, Sarah Charlotte  
26 Johnson, Nicholas J Kassebaum, Yousef Saleh Khader, Young-Ho Khang, Kristopher J Krohn, Barthelemy  
27 Kuate Defo, Xie Rachel Kulikoff, Michael Kutz, Mohsen Mazidi, Melkamu Merid Mengesha, Joseph  
28 Mikesell, Alireza Mohammadi, Christopher J L Murray, Mohsen Naghavi, Ionut Negoii, Olanrewaju  
29 Oladimeji, Mahesh PA, Max Petzold, David M Pigott, Sarah E Ray, Jürgen Rehm, Gregory A Roth, Enrico  
30 Rubagotti, Mohammad Ali Sahraian, Payman Salamati, Peilin Shi, Naris Silpakit, Chandrashekhar T  
31 Sreeramareddy, Vinay Srinivasan, Patrick J Sur, Mohammad Tavakkoli, Alexander H Thompson, Haidong  
32 Wang, Tissa Wijeratne, Gelin Xu, Pengpeng Ye, and Naohiro Yonemoto.

#### 33 [Managing the overall research enterprise](#)

34 Ashkan Afshin, Blair R Bumgarner, Charbel El Bcheraoui, Kara Estep, Simon I Hay, Laurie B Marczak, Ali H  
35 Mokdad, Meghan D Mooney, Erin Mullany, Kate Muller, Christopher J L Murray, Mohsen Naghavi,  
36 Joseph Salama, Katya A Shackelford, Amber Sligar, Caitlyn Steiner, and Haidong Wang.

#### 37 [Did not provide authorship contribution information](#)

38 Syed M Aljunid, Juma M Alkaabi, Rajaa Al-Raddadi, Elena Alvarez Martin, Shivanthi Balalla, Aminu K  
39 Bello, Soumyadeep Bhaumik, Habtamu Mellie Bizuayehu, Peter Bjerregaard, Soufiane Boufous,  
40 Alexandra Brazinova, Michael Burch, Ruben Estanislao Castro, Massimo Cirillo, Jefferson G Fernandes,  
41 Kahu Gebrekirstos Gebrekidan, Amha Admasie Gelaye, Bikila Lencha Gemechu, Kasiye Shiferaw  
42 Gemechu, Ricard Genova-Maleras, Shifalika Goenka, Rahul Gupta, Juanita A Haagsma, Sivadasanpillai

1 Harikrishnan, Claudiu Herteliu, Thomas Jaenisch, Achala Upendra Jayatilleke, Ye Jin, Ganesan  
2 Karthikeyan, Sefonias Getachew Kelbore, Andrew Haddon Kemp, Veena S Kulkarni, Steven E Lipshultz,  
3 Mark T Mackay, Geetha R Menon, Edward J Mills, Murali B V Mohan, Kovin S Naidoo, Lipika Nanda,  
4 Gopalakrishnan Natarajan, Muhammad Imran Nisar, Charles D Parry, Mahboubeh Parsaeian, Tejas Patel,  
5 Rogelio Perez-Padilla, Manorama Purwar, Sajjad Ur Rahman, Saleem M Rana, Paturi Vishnupriya Rao,  
6 Mohammad Bagher Rokni, Sare Safi, Amirhossein Sahebkar, Sundeep Santosh Salvi, Juan Ramon  
7 Sanabria, Sam Schulhofer-Wohl, Sheikh Mohammed Shariful Islam, Balakrishna P Shetty, Shireen Sindi,  
8 Prashant Kumar Singh, Eirini Skiadaresi, Joan B Soriano, Soumya Swaminathan, Dejen Yemane Tekle,  
9 Nihal Thomas, Fotis Topouzis, Ulises Trujillo, Nikolaos Tsilimparis, Jillian L Waid, James D Wilkinson,  
10 Shimelash Bitew Workie, Ayalnesh Zemene Yalew, and Yuichiro Yano.

1 **Section 1. GBD Overview**

2 **Section 1.1. Geographic Locations of the Analysis**

3 The geographic locations included in GBD 2016 have been arranged into a set of hierarchical categories  
4 composed of seven super-regions and a further nested set of 21 regions containing 195 countries and  
5 territories. The locations for which GBD estimated global, regional, and national life expectancy, all-  
6 cause mortality, and YLDs expanded following GBD 2015. For GBD 2016, subnational assessments are  
7 presented for China, India, the United States, and Brazil; results for other countries with a population  
8 greater than 200 million in 2016 and for those developed based on national policy interest are reported  
9 in separate studies or reports. Since GBD 2015, which included subnational assessments for Brazil, India,  
10 Japan, Kenya, Saudi Arabia, South Africa, Sweden, the United States, China, Mexico, and the United  
11 Kingdom, an additional two subnational assessments were undertaken. Subnational breakdowns for  
12 countries in GBD 2016 included: 26 states and one federal district for Brazil, 34 provinces and  
13 municipalities for China, 31 states and union territories of India, 34 provinces of Indonesia, and 51 states  
14 and districts for the United States. Combined, there are a total of 143 locations at the first subnational  
15 unit level. Included in subnational Level 1 locations are countries that have been subdivided into the first  
16 subnational level, such as states or provinces, for the GBD analysis; subnational Level 2 only applies to  
17 India and England. For this paper we present data at the national and territory level.

18 **Section 1.2. Time Period of the Analysis**

19 A complete set of life expectancy and all-cause deaths and rates were computed for the years 1970-  
20 2016.

21 All GBD 2016 mortality results and online data visualizations are available  
22 at <http://vizhub.healthdata.org/mortality>. Results for all GBD metrics available  
23 at <http://www.healthdata.org/results/data-visualizations>.

24 **Section 1.3. Statement of GATHER Compliance**

25 This study complies with the Guidelines for Accurate and Transparent Health Estimates Reporting  
26 (GATHER) recommendations. We have documented the steps involved in our analytical procedures and  
27 detailed the data sources used in compliance with the Guidelines for Accurate and Transparent Health  
28 Estimates Reporting (GATHER). See Appendix Table 1 for GATHER checklist.

29 The GATHER recommendations can be found here: <http://gather-statement.org/>

30 **Section 1.4. List of abbreviations**

- 31 5q0: probability of death from birth to age 5 years
- 32 45q15: probability of death from age 15 years to 60 years
- 33 ART: antiretroviral therapy
- 34 BTL: basic tabulation list
- 35 CBH: complete birth history
- 36 CD4: white blood cells (T-cells)
- 37 COD: causes of death
- 38 CODEm: Cause of Death Ensemble model
- 39 DALY: disability-adjusted life-year

- 1 DHS: Demographic and Health Surveys
- 2 DSP: Disease Surveillance Points
- 3 EPP: Estimation and Projection Package
- 4 GATHER: Guidelines for Accurate and Transparent Health Estimates Reporting
- 5 GBD: Global Burden of Disease
- 6 GEMS: Global Enteric Multicenter Study
- 7 HIV CDR: Crude death rate due to HIV/AIDS
- 8 ICD: International Classification of Disease
- 9 IPUMS: Integrated Public Use Microdata Series
- 10 LDI: lag-distributed income per capita
- 11 MCCD: Medical Certification of Causes of Death
- 12 MICS: Multiple Indicator Cluster Surveys
- 13 NCD: non-communicable disease
- 14 SBH: summary birth history
- 15 SDI: Socio-demographic Index
- 16 SEER: Surveillance, Epidemiology, and End Results Program
- 17 SRS: Sample Registration System
- 18 ST-GPR: Spatiotemporal Gaussian process regression
- 19 UI: uncertainty interval
- 20 UN: United Nations
- 21 U5MR: under-5 mortality rate
- 22 VR: vital registration
- 23 WFS: World Fertility Surveys
- 24 WHO: World Health Organization
- 25 YLD: years lived with disability
- 26 YLL: years of life lost

### 27 [Section 1.5. GBD results overview](#)

28 Results from the Global Burden of Disease Study (GBD 2016) are now measured in terabytes. Results are  
29 available in an interactive data downloading tool available in the Global Health Data exchange (GHDx).  
30 The tool contains the complete set of results from all summary papers; however, specialized tables from  
31 the papers are available as separate entries in the GHDx as were made available for GBD 2015.

32  
33 The current version of the data download tool is available in the GHDx and contains core summary  
34 results for the Global Burden of Disease Study 2016 (GBD 2016): [http://ghdx.healthdata.org/gbd-results-](http://ghdx.healthdata.org/gbd-results-tool)  
35 [tool](http://ghdx.healthdata.org/gbd-results-tool). The core summary results include deaths, YLLs, YLDs, and DALYs. It includes data for causes, risks,  
36 cause-risk attribution, etiologies, and impairments.

37  
38 In the GBD 2016 version, the tool also contains measures such as prevalence and incidence as well as  
39 rate of change data. Data above a certain size cannot be viewed online but can be downloaded.  
40 Depending on the size of the download, users need to enter an email address and a download location  
41 will be sent to them when the files are prepared.

1 [Section 1.6. Data input sources overview](#)

2 GBD 2016 incorporated a large number and wide variety of input sources to estimate mortality, causes  
3 of death and illness, and risk factors for 195 countries and territories from 1990-2016. These input  
4 sources are accessible through an interactive citation tool available in IHME's GHDx. Users can retrieve  
5 citations for a specific GBD component, cause or risk, and location by choosing from the available  
6 selection boxes. They can then view and access GHDx records for input sources and export a CSV file  
7 that includes the GHDx metadata, citations, and information about where the data were used in GBD.  
8 Additional metadata for each input source are available through the citation tool, as required by the  
9 GATHER statement.

10 The citation tool is accessible through the GHDx at [http://ghdx.healthdata.org/gbd-2016/data-input-](http://ghdx.healthdata.org/gbd-2016/data-input-sources)  
11 [sources](http://ghdx.healthdata.org/gbd-2016/data-input-sources)

12 [Section 1.7. Funding Sources](#)

13 Funding for this research was provided by the Bill & Melinda Gates Foundation, and the National  
14 Institute on Aging and the National Institute of Mental Health of the National Institutes of Health.

## 1 **Section 2. GBD 2016 All-Cause Mortality and HIV Estimation Process**

### 2 **Section 2.1. Overview**

3 The goal of the all-cause mortality estimation process for the GBD is to produce the most accurate time  
4 series estimates for 1970 to 2016 for all-cause deaths and death rates broken down into the GBD age  
5 groups and by sex for all 591 locations in the GBD 2016. This task is necessarily complicated by the  
6 diversity of data sources available for all-cause mortality for different age groups, the known biases in  
7 some sources, and the powerful effects of the HIV epidemic in countries with large epidemics on the age  
8 pattern of mortality. In this appendix, we divide the analysis of all-cause mortality into five distinct but  
9 interconnected areas: child mortality (5q0), adult mortality between ages 15 and 60 (45q15), estimation  
10 of a complete set of age-specific death rates, estimation of HIV mortality, and final estimates of age-  
11 specific mortality including HIV and fatal discontinuities. While HIV is a cause of death, we present some  
12 information on the epidemiological modeling of HIV in this section because of the close  
13 interdependency between HIV mortality estimation and the all-cause mortality estimation process.

14 If all countries had complete vital registration (VR) systems recording the event of death and periodic  
15 censuses, the task of estimating all-cause mortality rates would be much easier. However, for many  
16 countries of lower-to-middle levels of sociodemographic development, information systems on  
17 mortality are incomplete and multiple sources must be used to infer levels, trends, and patterns of  
18 mortality. The analytical building blocks of the process, as shown in Appendix Figure 1, are repeated  
19 through two full iterations. The reason for the iterations is the interdependence between the HIV  
20 epidemiological models on estimates of HIV-free all-cause mortality and the use of estimated HIV crude  
21 death rates as an input to the 5q0, 45q15, and age-specific mortality models. In the following sections,  
22 we provide more detail on each analytical module identifying primary input data and analytical  
23 processes.

### 24 **Section 2.2. Child mortality**

#### 25 **Section 2.2.1. Data sources**

##### 26 **Vital registration from Causes of Death team**

27 Approximately 62% of deaths data from VR systems were used as input for our all-cause mortality  
28 modeling. These data were provided by the GBD causes of death (CoD) research team and were  
29 aggregated into total age-sex-specific all-cause mortality for each location-year. This aggregation  
30 occurred after the data were adjusted and mapped to the GBD cause list.

31 Data intended for use in causes of death modeling are assessed for quality with respect to consistency  
32 of cause fractions, diagnostic accuracy, and missing data, whereas for all-cause mortality modeling it is  
33 more important that data are fully representative of the given estimation area and are consistent with  
34 other all-cause mortality data sources. Thus, there are cases in which VR data prepared for cause-  
35 specific modeling cannot be used in all-cause modeling or must be adjusted based on degree of  
36 completeness before being used.

37 In our vetting of CoD VR data, we dropped points with a more than 1% difference from corresponding  
38 points in the WHO database. There were instances where VR data used in cause-specific mortality



1 analysis had been collapsed to Basic Tabulation List (BTL) format rather than in full cause classification  
2 list format (e.g., ICD9). In some of these cases, we elected to use WHO data instead.

### 3 [Vital registration, sample registration systems, and Disease Surveillance Points from other sources](#)

4 We endeavored to include all available data from VR systems as inputs in our all-cause mortality  
5 estimation process. To achieve this, we utilized a number of multi-country VR sources, including the  
6 WHO Mortality Database, the Human Mortality Database, United Nations Demographic Yearbooks, and  
7 OECD (Organisation for Economic Co-operation and Development) databases. These multi-country  
8 sources are regularly updated in our systems when new data are added. Beyond multi-country sources,  
9 for all ongoing national VR systems (for example, the USA National Vital Statistics System), where  
10 possible, we cataloged all data sources from each system.

11 Some countries that do not have a well-performing VR system implement sample registration systems  
12 that are incomplete by design. We made use of these data, paying close attention to the proper  
13 weighting of sampled data and consistency with other representative sources. We have systematically  
14 extracted data from the Sample Registration System Statistical Report series published by the Registrar  
15 General of India. For the Disease Surveillance Points (DSP) system of China, we obtained both national  
16 and provincial level DSP data through a data usage agreement with the Chinese Center for Disease  
17 Control and Prevention. Census data are systematically extracted from Demographic Yearbook series,  
18 Integrated Public Use Microdata Series (IPUMS), and statistical reports from the national statistical  
19 bureaus. Manuscript Figure 1 shows more detail of percent of completeness of registered deaths from  
20 1990 to 2016.

### 21 [Under-5 populations and live births](#)

22 For most GBD locations, live births come from the World Population Prospects 2015 (WPP 2015). For  
23 subnational locations, we often use interpolated census birth numbers scaled to the national estimates.  
24 For locations not estimated in the WPP 2015, we use interpolated census birth counts.

### 25 [Complete birth history microdata](#)

26 Complete birth histories (CBHs), the preferred method for data collection on child mortality in the  
27 absence of VR, rely on administering surveys to mothers. The questionnaires ask about all living and  
28 deceased children, including date of birth, survival status, and date of death. These modules are  
29 included in many routine survey series, including the World Fertility Surveys (WFS), Demographic and  
30 Health Surveys (DHS), Multiple Indicator Cluster Surveys (MICS), and many national survey programs.  
31 When available, we download and use microdata that has individual-level survey responses as opposed  
32 to using tabulated results.

### 33 [Complete birth history tabulated data](#)

34 In some instances, tabulated records from reports become available before survey microdata, and we  
35 incorporate these data points into our database of 5q0 data as well. However, as microdata become  
36 available, we update with point estimates from our processed microdata rather than the tabulated  
37 report estimates.

38

## 1 [Summary birth history microdata](#)

2 Summary birth history (SBH) questionnaires are a shorter alternative to complete birth histories. Instead  
3 of asking in detail about each child, summary birth histories simply ask mothers how many children they  
4 have given birth to and how many of the children have died. The questionnaires are shorter and can be  
5 more easily attached to other surveys. Often, censuses and MICS surveys contain summary birth  
6 histories. For GBD, we have compiled all available SBH data with microdata that enables us to apply the  
7 updated SBH method that leads to more accurate and timely assessment of U5MR.<sup>1</sup>

## 8 [Summary birth history tabulated data](#)

9 In cases where we do not have access to the microdata on SBH modules from surveys and censuses, we  
10 utilize the reported estimates of U5MR from survey or census reports and outlier the first two data  
11 points based on mothers in ages 15-19 and 20-24.

## 12 [Under-5 age-sex patterns from VR/SRS/DSP](#)

13 VR systems are the primary source of data for the under-5 age pattern of mortality in high-income  
14 countries. Often, these data are classified into several age groups: early neonatal (0-6 days), late  
15 neonatal (7-27 days), post-neonatal (28-364 days), and 1 to 4 years. Some country-years of data have  
16 other age groupings with less specificity, with the early and late neonatal age groups combined, or all of  
17 the under-1 age groups combined. Sample Registration Systems (SRS) also provide data for the age-sex  
18 pattern of under-5 mortality in several countries (notably India and Bangladesh), as well as the DSP  
19 system in China.

## 20 [Under-5 age-sex patterns from complete birth history](#)

21 In many countries without VR systems, CBH surveys can be used to obtain age-sex patterns of mortality  
22 in under-5 age groups. These sources are described above in the “complete birth history microdata”  
23 section. For all CBH microdata sources, we apply direct estimation methods to obtain probabilities of  
24 death for each of the under-5 age groups. Within each survey, if each observation is a child recalled by a  
25 mother, observations are grouped into 5-year groups in time to provide a data point of probability of  
26 death for each of the under-5 age-sex groups. Recall is cut off 15 years before the survey, limiting data  
27 points estimated from the survey to the 15 years prior. All of these estimates are then put in the  
28 database of estimates for the age-sex pattern of under-5 mortality.

## 29 [Section 2.2.2. Vital registration prioritization](#)

30 Our continual evaluation of VR data sources has led us to develop a general hierarchy of preferred VR  
31 sources. When considering which of multiple sources to use for a given location-year, we first prefer to  
32 use WHO data from GBD cause-specific mortality estimation, then unadjusted WHO data, then Human  
33 Mortality Database (HMD) data, then UN Demographic Yearbook data. There were exceptions to this  
34 hierarchy where we had reason to believe that there were quality issues with a certain source. For  
35 instance, where available we preferred to use HMD VR over WHO data for Germany, Taiwan (Province of  
36 China), and Spain due to WHO data producing mortality rates that were inconsistent with previously established  
37 trends. Single-country VR sources were evaluated based on consistency with other data sources and also VR  
38 system documentation.

39

1 Section 2.2.3. Identify vital registration under-enumeration for bias correction

2 The approach to estimating the completeness of VR systems for deaths under age 5 is the same as that  
3 of the previous two GBD studies.

4 In many countries with VR systems to record deaths, CBH and/or SBH are also conducted. By comparing  
5 the under-5 death rates from these sources to the levels from VR or sample registration systems, we can  
6 assess the completeness of under-5 death registration. Completeness can evolve over time as seen with  
7 the likely declines in completeness in Central Asia in the 1990s or the increases in completeness in other  
8 settings.<sup>2,3</sup> We estimate VR completeness where VR data are available using a model that allows for  
9 completeness to vary over time. This assessment is undertaken in two steps: we first assess whether VR  
10 is biased, and then we assess time-varying completeness.

11 In the first step, a country-level regression of  $\log_{10}(5q_0)$  on year with a binary indicator variable for 5q0  
12 estimates derived from VR systems is used to determine whether or not a VR system is biased (see  
13 equation). If the coefficient for the VR indicator variable is statistically significant at the 0.05  $\alpha$ -level, we  
14 deem the VR system to be biased.

15 
$$\log_{10}(5q_0)_t = \alpha + \beta_1 * t + \beta_2 * I_{VR} + \xi_t$$

16  
17 where  $t$  is time (a continuous variable);  $I_{VR}$  is an indicator for 5q0 estimates derived from VR systems;  
18 and  $\xi_t$  is in error term.

19 Second, for all countries with biased VR systems, we estimate the bias, allowing for completeness to  
20 evolve over time. We first apply Loess regression to all non-VR 5q0 estimates in a given country; we then  
21 calculate the difference between the Loess predicted  $\log_{10}(5q_0)$  and the observed  $\log_{10}(5q_0)$  estimate  
22 from VR in a given year. Since we believe that completeness changes relatively slowly over time, the bias  
23 in any given year is defined as the mean difference between the predicted  $\log_{10}(5q_0)$  and the observed  
24  $\log_{10}(5q_0)$  from VR systems over the adjacent five-year period. This allows for flexibility in the bias  
25 correction over time while still maintaining the premise that the completeness of VR systems does not  
26 change abruptly. Loess predictions can be unreliable out of sample, so for country-years outside of the  
27 range of non-VR data used to generate the predicted 5q0, we use the mean bias from the nearest five  
28 years of bias estimates from VR points that are within the timespan of the non-VR data. We then correct  
29 the VR estimates of 5q0 using the bias correction as shown in the equation:

30  
31 
$$5q_0^{corr.} = 5q_0^{obs.} * 10^{\widehat{bias}}$$

32  
33 Where  $5q_0^{corr.}$  is the corrected estimate of 5q0;  $5q_0^{obs.}$  is the observed estimate of 5q0; and  
34  $\widehat{bias}$  is the bias estimate described above. Once the biased estimates have been adjusted, we also  
35 approximate the variance of the bias estimate. This variance is approximated using the median absolute  
36 deviation (MAD) comparing the biased VR estimates to the Loess-based estimate of  $\log_{10}(5q_0)$ . As with  
37 the bias estimation above, the MAD is estimated over a five-year time period. This MAD times 1.4826 is  
38 an approximation of standard deviation used to add variance to the biased VR data when included in our  
39 final Gaussian Process Regression (GPR) model described in detail later.

1 In addition to countries where there are both VR estimates and survey estimates of under-5 mortality,  
2 there are countries for which only VR data are available, and the VR systems are considered biased. This  
3 is a problem particularly in English-speaking Caribbean countries, so for these countries we have  
4 adjusted 5q0 estimates from VR using the regional average VR bias in a given year for those countries  
5 with both VR and survey 5q0 estimates. The countries for which VR systems have been adjusted using  
6 this method include Antigua and Barbuda, Bahamas, Barbados, Bermuda, Dominica, Grenada, Saint  
7 Lucia, and Saint Vincent and the Grenadines. While there is no direct evidence on the level of VR bias in  
8 these countries, assuming they are complete when similar countries in the region have under-  
9 registration seems unwarranted.

#### 10 [Section 2.2.4 Biennial 5q0 estimates](#)

##### 11 [Computation of complete birth history 5q0](#)

12 Microdata (individual-level survey data) from CBH yield direct calculation of death numbers and  
13 probabilities of death in the under-5 age group. Observations are grouped into two-year intervals such  
14 that biennial estimates of 5q0 are obtained from these survey data. In GBD 2016, we have unpooled  
15 surveys for our analysis, whereas surveys were pooled by series in GBD 2013.<sup>4</sup> Instead of grouping  
16 observations from all DHS complete birth history questionnaires from a country into one full set of  
17 observations and all MICS observations from multiple survey years into another full set of observations,  
18 we analyzed each survey separately by location (e.g., DHS 2012, DHS 1996, MICS 2002). This allowed for  
19 a greater ability to address known data quality issues in specific surveys. To compensate for the  
20 decreased sample size and to generate greater stability in the unpooled data points, we created two-  
21 year estimates of under-5 mortality, pooling observations over two-year periods instead of single years.

##### 22 [Processing of tabular complete birth history](#)

23 In some instances, microdata from surveys were not available. If survey reports could be obtained but  
24 the microdata were not available for us to do our own calculations to obtain 5q0, we used report data  
25 point estimates. These estimates were added directly to the under-5 mortality database.

#### 26 [Section 2.2.5. Summary birth history time series method](#)

##### 27 [Summary birth history method from microdata](#)

28 Rajaratnam and colleagues developed an updated SBH method that is able to provide more accurate  
29 and timely estimates of U5MR from microdata on SBH from surveys and censuses.<sup>1</sup>

##### 30 [Analysis of summary birth history from tabular data](#)

31 When only tabular data are available for the numbers of children ever born and number of children that  
32 have died by mother's age, we apply the Maternal Age Cohort model from the method developed by  
33 Rajaratnam and colleagues.<sup>1</sup>

#### 34 [Section 2.2.6. 5q0 data synthesis, model running, and bias correction](#)

##### 35 [Data synthesis using ST-GPR and bias correction](#)

36 We apply the child mortality estimation methodology as reported by Wang and colleagues.<sup>4</sup> Based on  
37 the under-5 mortality data synthesis model for the Global Burden of Disease Study 2010,<sup>2,5</sup> 2013,<sup>4</sup> and  
38 2015,<sup>6</sup> we have incorporated data bias adjustment into the modeling process. Specifically, we have

1 included a fixed effect for source type across all locations to detect systematic differences in the level of  
 2 child mortality, controlling for covariates for one source type versus another. The groups of sources  
 3 used to make this adjustment are listed in the table below. In addition, we include a random effect for  
 4 each country-source. By choosing a reference source country-by-country or using the mean of a set of  
 5 sources, we can adjust on a country-by-country basis for the problem of compositional bias created by  
 6 substantial source-specific non-sampling error. Reference sources are not adjusted, even if multiple  
 7 sources are used as reference. Once the systematic difference in sources is removed, we are able to  
 8 avoid estimating false trends due to partial overlap of sources with different levels of non-sampling  
 9 variance. We then apply the combination of non-linear mixed effects model, spatiotemporal regression,  
 10 and Gaussian process regression to synthesize raw child mortality data after data bias adjustment to  
 11 obtain consistent time series estimates of mortality with 95% uncertainty intervals for every country.

12

13 **Table:** Source types used in child mortality bias correction

| <b>Data Source Type</b>                                                                 |
|-----------------------------------------------------------------------------------------|
| Complete Birth History-Demographic and Health Survey                                    |
| Complete Birth History-AIDS Indicator Survey and Malaria Indicators Survey              |
| Complete Birth History-World Fertility Survey                                           |
| Complete Birth History-Multiple Indicator Cluster Survey                                |
| Complete Birth History-Census                                                           |
| Complete Birth History-Other survey Series                                              |
| Summary Birth History-Demographic and Health Survey                                     |
| Summary Birth History-Multiple Indicator Cluster Survey                                 |
| Summary Birth History-Other survey series                                               |
| Summary Birth History-AIDS Indicator Survey and Malaria Indicators Survey               |
| Summary Birth History-Census                                                            |
| Summary Birth History-World Fertility Survey                                            |
| Vital Registration/Sample Registration/Surveillance- complete                           |
| Vital Registration/Sample Registration/Surveillance- incomplete                         |
| Household Death Recall-Other survey series                                              |
| Household Death Recall-Census                                                           |
| Household Death Recall – incomplete Vital Registration/Sample Registration/Surveillance |

14

15 [Mixed effect non-linear model and the bias adjustment for raw U5MR sources](#)

16 In this stage, we used a non-linear mixed effects regression to estimate data bias and provide first stage  
 17 predictions.

18

19

1 The nonlinear mixed effects regression model is

$$2 \quad {}_5m_{0cys} = \exp[(\beta_1 + \gamma_{1c}) * \log(LDI_{cy}) + (\beta_2 + \gamma_{2c}) * education_{cy} + \gamma_c + \gamma_{cs} + \alpha_t] +$$
$$3 \quad \beta_3 * HIV_{cy} + \varepsilon_{cys}$$

4 where  $c$  is country,  $y$  is year,  $s$  is source, and  $t$  is source type; each source was categorized into one of  
5 17 source types across all countries, as listed in the table above.

6 Additionally,  ${}_5m_0$  is under-5 mortality rate;  $LDI$  is lag-distributed income per capita;  $education$  is mean  
7 years of education for women of reproductive age (15-49 years);  $HIV$  is death rate due to HIV in age  
8 groups 0-4;  $\gamma$  is a random effect;  $\alpha$  is a fixed effect on source type across countries;  $\beta_i$  is a fixed covariate  
9 coefficient; and  $\varepsilon$  is the residual. For each country, we rely on expert opinion to choose a source, or  
10 combination of sources, which are believed to be the least biased. If a country has a VR system which we  
11 deem to be complete (described in detail in an earlier section), this is the reference source. If a country  
12 does not have complete VR system, but has DHS estimates from complete birth histories, these were  
13 chosen as the reference source. If a country has neither of these types of data or DHS estimates are  
14 deemed unreliable, we assigned the surveys conducted after 1970, in combination, as the reference  
15 (incomplete VR data are not included). Additionally, in many countries we chose other surveys as the  
16 reference. For accurate estimation, it is important to have local knowledge on specific data sources'  
17 accuracy. All-cause mortality experts draw from their familiarity with data quality to help us to choose  
18 the reference category.

19 Each data source has an associated random effect as well as a source type fixed effect. The values of  
20 these random and fixed effects for the reference sources are deemed to be the true deviation from  
21 unbiased mortality level. In countries with multiple high-quality sources, the mean of the random and  
22 fixed effects from these sources is taken as this true deviation. We adjusted all other sources by  
23 including these reference values for the random and fixed effects values instead of those estimated for  
24 each individual source, as shown below.

$$25 \quad adjusted_5m_{0,cys} = \exp[(\beta_1 + \gamma_{1c}) * \log(LDI_{cy}) + (\beta_2 + \gamma_{2c}) * education_{cy} + \gamma_c + \gamma_{ref,c} +$$
$$26 \quad \alpha_{ref,c}] + (\beta_3 + \gamma_{3c}) * HIV_{cy} + \varepsilon_{cys}$$

27 The exception to this correction is incomplete VR data, which was adjusted upwards using a five year  
28 rolling mean of the difference between incomplete vital registration and a Loess of the already-adjusted  
29 survey data, described above in section 2.2.3.

### 30 [Spatiotemporal smoothing](#)

31 The spatiotemporal stage smooths the residuals between the predicted time series of 5q0 and the  
32 adjusted raw data over time and across countries in the same GBD region. The predicted time series for  
33 this smoother was obtained from the equation below; no random effects or survey type fixed effects are  
34 included.

$$35 \quad predicted_5m_{0,cy} = \exp[\beta_1 * \log(LDI_{cy}) + \beta_2 * education_{cy} + \alpha_{intercept}] + \beta_3 * HIV_{cy}$$

36 We first found the residuals between the predicted time series, above, and the adjusted points. We then  
37 applied a combination of smoothing functions to these residuals. For each country-year, we weighted all

1 the data points in this region based on their proximity to this country-year in space and time. We gave  
 2 99% of the weight to in-country residuals, and 1% of the weight to out-of-country residuals. Additionally,  
 3 we used a modified tricubic window, as specified below, to give more weight to points closer in time,  
 4 and less weight to points further in time.

$$5 \quad w_t = \left( 1 - \left( \frac{|r_t - r_{est}|}{1 + \operatorname{argmax}_t |r_t - r_{est}|} \right)^\lambda \right)^3$$

6 The  $r_t$  and  $r_{est}$  terms are, respectively, the year of interest and the year of the residual being weighted.  
 7 The  $\operatorname{argmax}_t |r_t - r_{est}|$  term is the maximum distance between the year of interest and a residual within  
 8 the region. The  $\lambda$  parameter in this weighting function dictates how quickly the weights fall off as the  
 9 distance in time increases: a larger  $\lambda$  implies that the assigned weights will diminish slowly with time,  
 10 while a smaller  $\lambda$  allows the weights to diminish more rapidly with time.

11  $\lambda$  values were chosen using the parameter selection process described below. We then created one  
 12 estimate of the smoothed residuals using a linear fit to this weighted data; this is similar to a Loess fit.  
 13 Additionally, we created a second estimate of the smoothed residuals by calculating the weighted  
 14 average of this data.

15 We then combined these two estimates for a final estimate of the smoothed residuals. In data-dense  
 16 countries, more weight was given to the local linear fit; in data sparse countries, more weight was given  
 17 to the weighted average. The equation for this is as follows.

$$18 \quad \text{final smoothed residual} = k * \text{linear estimate} + (1 - k) * \text{weighted average}$$

$$19 \quad \text{where } k = \frac{\text{number of in country data points}}{\text{number of in country data points} + \text{number of country years with no data}}$$

20 Finally, the smoothed residuals were added back to the predictions from above; this smoothed  
 21 approximation to the adjusted data was used as the prior for GPR, described below.

### 22 *Third stage: Gaussian process regression (GPR)*

23 The output of the space-time smoothing step was used as a prior for GPR, which produced a final time  
 24 series of point estimates, as well as confidence bounds. Parameters for GPR were chosen through cross-  
 25 validation as described below.

26 The model for GPR is shown below, where  $\mu_t$  is the true  $\log_{10}(5q0)$  at time  $t$ ,  $f(t)$  is the baseline mortality  
 27 risk, and  $S_t$  captures excess mortality due to fatal discontinuities.  $S_t$  is estimated independently of  $f(t)$ .  $M$   
 28 and  $C$  describe the Gaussian process, giving the mean and covariance, respectively.

$$\mu_t = f(t) + S_t$$

$$f(t) \sim \text{GP}(M, C)$$

29 We specified a prior distribution for  $f(t)$  from the spatiotemporal regression, and a likelihood function  
 30 which describes the data generation process; the specified prior distributions and likelihood function are  
 31 described below. We then used Markov Chain Monte Carlo (MCMC)<sup>7</sup> to approximate the posterior

1 distribution of  $f(t)$  which also incorporates information from the observed empirical estimates of adult  
2 mortality. An MCMC chain of length 5,000 was produced; the first 3,000 samples were discarded and  
3 the remaining 2000 were thinned by a factor of 2 for a total of 1,000 simulations retained. The reported  
4 best estimates and uncertainty intervals were generated from the mean and the 2.5<sup>th</sup> and 97.5<sup>th</sup>  
5 percentiles of the 1,000 samples, respectively.

6 The prior distribution of  $f(t)$  can be described in terms of the mean prior—the prior for  $M$ —and the  
7 covariance prior—the prior for  $C$ . We utilized the second stage predictions as the mean prior and used a  
8 Matern covariance function to describe the covariance prior. The parameters of the Matern covariance  
9 function were selected through cross-validation and are location-specific.

## 10 Likelihood

11 The likelihood describes the probability of observing the data given a particular set of parameters. As  
12 shown in the equation below, we used a normal model for describing the probability of observing a  
13 particular value of  $\log_{10}(5q_0)$  where the mean is given by  $f(t)$  and the variance by  $V_t$ , the data variance.

$$\log_{10}(5q_{0t}) \sim \text{Normal}(f(t), V_t)$$

14 Data variance was calculated for each empirical observation of  $5q_0$  and incorporated both sampling and  
15 non-sampling variation. The method for calculating the data variance depended on the type of data:

- 16 1. For estimates derived from complete VR data we assumed that there was no non-sampling  
17 variance and included only sampling variance as computed from a binomial model. We set  $N$   
18 equal to the national population aged 0 to 5 years and  $p$  equal to the mortality rate,  ${}_5m_0$ .  
19 We calculated the variance of  ${}_5m_0$  from  $p(1-p)/N$  and then transformed this to the variance  
20 of  $\log_{10}(5q_0)$  using the delta method.<sup>8</sup>
- 21 2. For estimates derived from incomplete VR data, we wanted to include not only sampling  
22 variance but also the non-sampling variance that arises from uncertainty in the  
23 completeness estimate. For these data, the total data variance was given by the sum of the  
24 sampling variance (calculated as for complete VR data) and the variance of the  
25 completeness estimate;
- 26 3. For estimates derived from CBHs we generate 1,000 simulations of  $5q_0$ , convert these  
27 estimates into  $\log_{10}$  space and calculate the sampling variance from these 1,000 simulations;
- 28 4. For estimates derived from SBHs we use the standard error from the mean residuals;
- 29 5. For estimates not covered under the above four calculations the missing data variance is  
30 determined as the maximum standard error from non-VR points in the country, if the data  
31 variance is still missing it is calculated as the maximum standard error from non-VR data in  
32 the GBD region.
- 33 6. Finally, for each source type, we calculate the within-source-type variance of the source-  
34 specific random effect. This additional non-sampling variance is then converted to  $\log_{10}$   
35 space and added to the variance as calculated above for all data points not classified as  
36 complete VR.



1 [Hyper-parameter selection for under-5 mortality rate ST-GPR](#)

2 For GBD 2016, we used the same hyper-parameters that were selected for GBD 2015. For locations that  
3 were newly added in GBD 2016, we used for Indonesia national-level parameters for the provinces and  
4 the average parameter values for Japanese prefectures for the British local government areas.

5  
6 In GBD 2015, we expanded the scope of our parameter selection to include variables used in space-time  
7 smoothing in addition to scale and amplitude used in GPR. We applied rigorous out-of-sample predictive  
8 validity testing to select space-time and GPR parameters, and the process was carried out in the  
9 following steps:

10

11 1. For space-time smoothing, we tested  $\zeta$  space weight values of 0.7, 0.8, 0.9, and 0.99 and  $\lambda$  time  
12 weight values of 0.1 to 0.9 in increments of 0.1. We test five values of the scale—10, 15, 20, 25, 30 ---  
13 and five values of the squared amplitude—1, 1.5, 2, 2.5, and 3 times the mean squared error of the  
14 residuals from the second-stage prediction model. Because we tested combinations of both space-time  
15 and GPR parameters, this led to a total of 900 combinations tested in each process.

16

17 2. We divided the data into testing and training sets 100 times. Data were divided as follows: for each  
18 region, a number X between 10 and 20 was sampled and the most recent X years of data in that region  
19 were assigned to the testing set. Then a number N between 5 and 10 was sampled, a country from  
20 within the region was sampled, and a year where there is data in that country was sampled. All data  
21 within N years of the selected year in the selected country were assigned to the testing set. This was  
22 repeated as many times as there were countries in the region. Because iterations of this procedure were  
23 independent, the data selected for the testing set could overlap. Any data that were not selected for the  
24 testing set were included in the training set.

25

26 3. The space-time smoothing and GPR were fit on the training set using each set of parameters and  
27 estimates for every location are generated for the entire time period;

28

29 4. Within a given iteration we calculated the absolute relative error of the final GPR estimates compared  
30 to each empirical estimate in the testing set. We also classified each empirical estimate in the testing set  
31 as covered or not covered and calculated the percent of the data covered by the 95% uncertainty  
32 interval of the GPR estimates while considering the uncertainty of the data themselves. The  
33 determination of coverage was made by calculating total variance—the sum of the data variance and  
34 the variance of the GPR estimate—and then calculating a 95% uncertainty interval around the GPR  
35 estimate based on this total variance and assuming a normal distribution. If the empirical estimate was  
36 within this uncertainty interval, it was classified as covered, and otherwise not. For each combination of  
37 parameters, we calculated the mean absolute relative error and the mean coverage across all iterations  
38 from all countries within a particular group. The loss function described below was then calculated for  
39 each parameter combination, and the parameter combination with the lowest loss was selected for  
40 each group;

41

42

1 if coverage  $\leq 0.95$ , loss = absolute relative error +  $((1 - \text{coverage}) - 0.05) / 5$   
2 if coverage  $> 0.95$ , loss = absolute relative error +  $(0.05 - (1 - \text{coverage})) / 1$

3  
4 5. For U5MR, parameter selection occurred at the location level, i.e. different parameters for each  
5 location. While there were data sparse locations, all locations had some data on U5MR for the time  
6 period we provide estimates for.

7 In some cases, we restricted the universe of possible parameters. Most of these restrictions occurred for  
8 the  $\lambda$  parameter. For many locations with complete VR, we knew that higher lambda values would result  
9 in a larger uncertainty interval than would be appropriate based on the quality of the available data. We  
10 also included a lower limit of  $\lambda$  for some locations with either incomplete VR or no VR, so that  
11 confidence intervals would reflect the uncertainty of these data. For example, in Western Europe, High-  
12 Income North America, High-Income Asia Pacific, and Australasia, we set the condition that  $\lambda$  must be  
13 less than 0.5 and the condition that  $\zeta$  be 0.99. We also made some other manual exceptions to  $\lambda$ ,  $\zeta$ , and  
14 scale where results did not pass common sense tests.

15 We set the differentiability to 0.8 in countries with only complete VR data, except those in the  
16 Caribbean, Oceania, and the country of Mauritius, and to 2.0 in other all other locations. We used a  
17 lower differentiability in countries with complete VR data because in these countries we wanted the  
18 final estimates to follow the data closely even if the trend described was not smooth. In contrast, in  
19 countries where the data were less reliable we did not want the final estimates to be overly influenced  
20 by individual data points.

#### 21 [Section 2.2.7. Identify and remove outliers](#)

22 There are several important quality-control steps in reviewing child mortality data and estimates. First,  
23 data points from years in which fatal discontinuities occurred are outliered, unless they are VR data  
24 points with sufficient information that the fatal discontinuities can simply be subtracted out of the VR  
25 data. The intent is to capture the underlying mortality risk rather than large stochastic variations. These  
26 fatal discontinuities are then added on in a later step (see section 2.7.3). Secondly, we outlier data  
27 sources with quality concerns such as the Afghanistan DHS from 2010. Our extensive collaborator  
28 network allows for review of sources, and collaborators can raise concerns over known issues with data  
29 sources about which they have expert knowledge.

#### 30 [Section 2.2.8. Rake subnational estimates to national level \(excluding South Africa\)](#)

31 The estimation process for 5q0 does not enforce consistency between subnational estimates and  
32 national estimates. To ensure consistency throughout the GBD hierarchy, we rescaled the subnational  
33 estimates to the national level by population-weighting to get an implied national estimate from the  
34 subnational estimates, creating a scalar of the national-level estimate from GPR to the aggregated  
35 subnational estimates, and then multiplying all of the subnational estimates by this scalar to obtain the  
36 scaled estimates. In most cases, we considered national-level estimates to be more reliable, so we chose  
37 this strategy of subnational scaling. In locations with high-quality VR data, this scaling has a minimal  
38 effect, but the effect can be greater in locations with more subnational units and variable-quality data.

1 In South Africa, it was essential that the province-specific mortality patterns be consistent with HIV  
2 models, since such a large part of the trend was driven by deaths due to HIV/AIDS. In this case, instead  
3 of scaling provincial-level estimates to national-level GPR estimates, we aggregated province-level GPR  
4 estimates to generate the national-level estimates.

#### 5 Section 2.2.9. Review estimates for quality

6 Estimates of 5q0 from the ST-GPR process were reviewed in comparison to UNICEF estimates from their  
7 2015 revision and GBD 2015 results.<sup>9</sup> Any differences were traced to either changes in available data or  
8 changes induced by changes in hyper-parameters or input covariates. Revisions were made through this  
9 review process and through expert consultation with the GBD mortality collaborator network.

#### 10 Section 2.2.10. Under-5 mortality rates with HIV

11 The 5q0 ST-GPR process generates U5MR for all GBD 2016 locations that is inclusive of the impact of all  
12 causes of death excluding fatal discontinuities, which are added in a separate step (see section 2.7.3).

#### 13 Section 2.2.11. HIV-free 5q0

14 As a result of the non-linear mixed effects model, we are able to generate HIV-free 5q0 counterfactuals  
15 where the crude death rate due to HIV in age group 0-4 is set to zero. This is a crucial input to the GBD  
16 model life table system as described in section 2.5.

#### 17 Section 2.2.12. Under-5 age and sex pattern model estimation

18 The process used to break down under-5 mortality into age- and sex- specific groups has been  
19 previously described.<sup>7</sup> The current process is largely similar but has been modified to improve the  
20 accuracy of predictions for countries affected by HIV/AIDS. As pointed out by Bradshaw et al.,<sup>10</sup> neonatal  
21 mortality tends to be overestimated if the all-cause under-5 mortality rate is used as the only predictor.  
22 We use a multi-stage modeling process to generate sex-specific estimates of early neonatal (days 0 to 6),  
23 late neonatal (days 7 to 27), post-neonatal (the remainder of the first year), under-1, and childhood  
24 (ages 1 to 4) mortality. First, the ratio of male to female under-5 probability of death is estimated, then  
25 age- and sex-specific mortality estimates are generated using this ratio. To fit models to obtain  
26 estimates, data from VR, sample VR, and CBHs are converted to mortality risks for specific age groups.  
27 Sources have differing levels of age specificity and at least include infant (composed of early neonatal,  
28 late neonatal, and post-neonatal) and child mortality, but can include all 4 smaller age groups. The two  
29 models – first the sex model, then the age-specific and sex specific model – are fit on the data.

30 The sex model first predicts the ratio of male probability of death under age 5 (5q0) to female 5q0 in  
31 rescaled logit space for each country  $i$  in region  $j$  in year  $t$ . The data are ordered by observed 5q0, and  
32 categorized into 20 evenly sized bins. We rescale the ratio data between 0 and 1 from between 0.8 and  
33 1.5. Then the model is fit to the data as described in the equation below.

$$35 \quad \text{logit} \left( \frac{\text{Male } {}_5q_0}{\text{Female } {}_5q_0} \right)_{\text{jit}} = \beta + \gamma_{5q_0 \text{ bin}} + \gamma_j + \gamma_i + \varepsilon_{\text{jit}}$$

34

1 The ratio is predicted by nested location and region random effects  $\gamma_i$  and  $\gamma_j$ , a random effect on the 5q0  
 2 bin, and an intercept term,  $\beta$ . A Loess regression is then used to smooth the estimated  $\gamma_{5q0 \text{ bin}}$  on 5q0,  
 3 creating a continuous  $\gamma'_{5q0 \text{ bin}}$ . Then, the equation below is used to predict the ratio of male to female  
 4 5q0:

$$5 \quad \text{logit} \left( \frac{\text{Male}_{5q0}}{\text{Female}_{5q0}} \right)_{\text{jit}} = \hat{\beta} + \gamma'_{5q0 \text{ bin}} (5q0_{\text{jit}}) + \hat{\gamma}_j + \hat{\gamma}_i$$

6 The predicted ratios are unscaled and inverse logited and used as the first stage prediction for ST-GPR as  
 7 used for the estimation of under-5 mortality rate as described in this appendix. ST-GPR hyper-  
 8 parameters were chosen based on location-specific data density. The male and female 5q0 values are  
 9 found using the system of equations that includes the prediction from the ST-GPR described above and  
 10 equation below, where  $r_{\text{birth}}$  is the sex-ratio at birth.

$$11 \quad 5q0 = \left( \frac{1}{1+r_{\text{birth}}} \right) * (\text{female}_{5q0}) + \left( \frac{r_{\text{birth}}}{1+r_{\text{birth}}} \right) * (\text{male}_{5q0})$$

12 Age-specific models are then fit for each age group on sex-specific data. A separate model is fit for each  
 13 age group yielding five models for each sex: early neonatal, late neonatal, postneonatal, infant, and  
 14 child. The log of the probability that an under-5 death occurs in a given age group conditioned on  
 15 surviving to that age group is modeled instead of the mortality risk, simplifying the scaling process and  
 16 restricting risks to be between 0 and 1. Because evidence suggests HIV has differential effects on  
 17 different under-5 age groups,<sup>11,12</sup> the crude death rates from HIV/AIDS in the under-5 age group were  
 18 included in the model for age groups after neonatal, since we make the assumption that all HIV deaths  
 19 that occur in the first year of a child's life occur in the post-neonatal stage (after 28 days), since the  
 20 literature on HIV in these age groups is still unclear but seems to indicate higher mortality in the post-  
 21 neonatal stage, and there is no clear evidence to guide alternative methods of age-splitting under-1  
 22 deaths due to HIV.<sup>12,13</sup> We used crude death rate due to HIV from the GBD 2016 model (see section  
 23 2.2.6). The inclusion of this covariate improves both the fit and prediction of the model in countries with  
 24 high HIV prevalence. In addition, in this version of GBD, we restricted the two new covariates added last  
 25 round to the 1 to 4 age group, as they produced implausible directionality of correlation for the other  
 26 age groups. That is, we included the maternal education covariate that is also used in the 5q0 first-stage  
 27 model and the completeness of the source-specific 5q0 estimate for the data-point used in the  
 28 regression for that 1 to 4 age group only. This completeness measure was calculated by taking the  
 29 source-specific 5q0 point estimate and dividing by the final 5q0 estimate from GPR. The functional forms  
 30 of the model are below.

$$31 \quad \log(\text{Pr}(\text{death at age enn} | \text{u5 death})_{\text{jit}}) = \beta_1 + \gamma_{5q0 \text{ bin}} + \gamma_j + \gamma_i + \epsilon_{\text{jit}}$$

$$32 \quad \log(\text{Pr}(\text{death at age y} | \text{u5 death})_{\text{jit}}) = \beta_1 + \beta_2 * HIV_{it} + \gamma_{5q0 \text{ bin}} + \gamma_j + \gamma_i + \epsilon_{\text{jit}}$$

$$33 \quad \log(\text{Pr}(\text{death in age 1 - 4} | \text{u5 death})_{\text{jit}}) = \beta_1 + \beta_2 * HIV_{it} + \beta_3 * Mat.Ed_{.it} + \beta_4 * \\ 34 \quad \text{Completeness}_{sit} + \gamma_{5q0 \text{ bin}} + \gamma_j + \gamma_i + \epsilon_{\text{jit}}$$

35 Where age y includes late-neonatal, post-neonatal, and under-1.

1 Similar to the sex model, the sex-specific age prediction uses 5q0 bins and smooths the random effect  
 2 on the bin using 5q0. The prediction equation for age  $y$  in country in region  $j$  at time  $t$  for the age group  
 3 1 to 4 is seen below, with nested random effects on country ( $\hat{\gamma}_i$ ) and region ( $\hat{\gamma}_j$ ), an intercept term ( $\hat{\beta}_1$ ),  
 4 a smoothed random effect on 5q0 bin ( $\hat{\gamma}'_{5q0 \text{ bin}(5q0_{j|t})}$ ), a coefficient on the under-5 crude death rate  
 5 from HIV ( $\hat{\beta}_2$ ), a coefficient on maternal education ( $\hat{\beta}_3$ ), and a coefficient on completeness ( $\hat{\beta}_4$ ):

$$6 \quad \log(\text{Pr}(\text{death in age } 1 - 4 | \text{u5 death})_{j|t}) = \hat{\beta}_1 + \hat{\beta}_2 * HIV_{it} + \hat{\beta}_3 * Mat.Ed._{it} + \hat{\beta}_4 * 1 +$$

$$7 \quad \hat{\gamma}'_{5q0 \text{ bin}(5q0_{j|t})} + \hat{\gamma}_j + \hat{\gamma}_i$$

8 Note that for prediction, the completeness coefficient gets multiplied by 1 instead of a source-specific  
 9 completeness, as we seek to predict based on a hypothetically complete source. Similar the sex ratio  
 10 model discussed earlier, these predictions are used as the first stage prediction for ST-GPR that  
 11 produces sex and age specific probabilities of death.

12 Once each of these predictions is made by age group, they are rescaled such that the probabilities of  
 13 death in the early neonatal, late neonatal, post-neonatal, and 1 to 4-year age groups aggregate to the  
 14 5q0 estimates from the under-5 model.

#### 15 [Section 2.2.13. Identify and remove outliers](#)

16 There are several criteria for removing outliers for the under-5 age-sex pattern model. For the sex  
 17 model, non-VR (survey) data points from high-quality VR locations (as determined by the GBD vital  
 18 registration quality rating system) are outliered to ensure the model follows the highest quality data.  
 19 Additionally, un-outliered sex ratio data were adjusted to be between 0.8 and 1.5. For the age model,  
 20 the following outliering criteria were used. VR data that are considered incomplete are marked as  
 21 outliers. To be considered incomplete, the 9-year rolling average of the VR data 5q0 value is compared  
 22 to the 9-year rolling average of the 5q0 estimates. Then, for a given data-year, the value of 5q0 in the  
 23 raw data is compared to our final 5q0 estimate. A value of 85% would be considered incomplete and  
 24 outliered, unless the ratio of the 9-year rolling average above is above 85% complete. Any data that are  
 25 chosen as outliers as part of the 5q0 analysis are also marked as outliers in the age pattern analysis. If a  
 26 country has both VR and CBH data, they are typically both used, unless the two conflict, in which case  
 27 the VR data are used. CBH data points more than 15 years before the survey are outliered. Lastly, some  
 28 data points are manually outliered. For example, the definition of live birth changed in some Eastern  
 29 European countries in the 1990s, leading to inconsistencies. In this case, age group data in ages that  
 30 would include childbirth deaths (early neonatal, neonatal, and ages 1-4) are outliered if the definition of  
 31 live birth contains a minimum weight, as it did in some of these locations.

#### 32 [Section 2.2.14. Under-5 age-sex splitting model application](#)

33 The prediction method from the age-specific model is described above in section 2.2.12. First, the  
 34 results of the sex model are applied, yielding sex-specific 5q0 estimates. Once age-sex-specific  
 35 predictions of the log conditional probability of death are made, these are exponentiated and rescaled  
 36 so that they sum to 1. First, the under-1 and 1-4 conditional probabilities are scaled to add to 1. Then,  
 37 the early neonatal, late neonatal, and post-neonatal conditional probabilities are scaled to the under-1  
 38 conditional probability. Then, the probabilities of death can be calculated so that they properly

1 aggregate to the final 5q0 prediction. For example, to calculate the probability of death in the early  
2 neonatal age group, the rescaled conditional probability of early neonatal death given under-5 death is  
3 multiplied by the probability of under-5 death. Then, to obtain the probability of death in the late  
4 neonatal age group, the rescaled conditional probability of death in the late neonatal age group given  
5 under-5 death is multiplied by the probability of under-5 death and then divided by the probability of  
6 survival to the beginning of the age group, and so on. Equations below represent this process, where  
7 *enn* represents early neonatal and *lnn* represents late neonatal.

$$8 \quad q_{enn} = \text{Pr}(\text{death in } enn \mid u5 \text{ death}) * 5q0$$

$$12 \quad q_{lnn} = \text{Pr}(\text{death in } lnn \mid u5 \text{ death}) * 5q0 / (1 - q_{enn})$$

9

10 The rest of the older age groups are also calculated in this manner, yielding probabilities of death in  
11 each of the under-5 age-sex groups.

### 13 [Section 2.2.15. Update under-5 populations using fatal discontinuities](#)

14 To obtain denominators for VR death numbers and to estimate death numbers for age groups under-5,  
15 we need to obtain age-specific populations for the under-5 age groups. Using final probability of death  
16 estimates including impacts of fatal discontinuities from the first run of the all-cause mortality process  
17 as the mortality risks, we take our input birth numbers and create person-year estimates of population  
18 as described in section 2.2.1. These person-year estimates are then the input as populations for the final  
19 run of the estimation process.

### 20 [Section 2.2.16. Under-5 death number estimation](#)

#### 21 [Assigning under-5 deaths to GBD age-sex groups](#)

22 To estimate the number of under-5 deaths, we run an estimation process that ages birth cohorts  
23 through our estimated probabilities of death. This process separates our yearly birth numbers for each  
24 location into week-sized cohorts and ages each of these cohorts through our mortality estimates in  
25 week-long steps to estimate the number of person-years and deaths in each of the early neonatal, late  
26 neonatal, postneonatal, and 1-4 years age groups.

### 27 [Section 2.3. Stillbirth Data and Estimation](#)

#### 28 [Section 2.3.1. Data sources](#)

##### 29 [Vital registration and government report data](#)

30 Our search for stillbirth data from countries with vital registration systems began with GBD ICD-coded  
31 vital registration deaths database. In the GBD causes of death database, certain ICD codes are mapped  
32 to late foetal deaths and then discarded in the normal cause of death modelling process. We extracted  
33 those data, but found their coverage of stillbirths to be largely incomplete and lacking important  
34 information such as gestational age at time of foetal death. After the GBD causes of death VR data, our  
35 search continued with other multi-country sources, notably the WHO Europe Health for All database  
36 and UN Demographic Yearbooks. After extracting data from multi-country sources, we began sifting  
37 through single-country vital statistics reports published by national ministries of health or statistical  
38 offices. During the data seeking and extraction process, we were careful to note national differences and

1 changes in definition of stillbirth so as to adjust data to align with the international standard definition  
2 of foetal death after 28 weeks of gestation or at a foetal weight of greater than 1,000 grams.

3 The process of preparing stillbirth vital registration data for modelling is similar to that for other data-  
4 types and models. Depending on source and format of raw input data, a certain amount of data cleaning  
5 was required to extract usable stillbirth values and source-specific live births values. We also extracted  
6 source-specific neonatal mortality data from many sources.

### 7 [Surveys](#)

8 Stillbirth rates were extracted from USAID Demographic and Health Surveys, Reproductive Health  
9 Surveys, and UNICEF Multiple Indicator Cluster surveys.

10 Stillbirth rates were calculated for Demographic Health Surveys if microdata were available and if the  
11 microdata recorded contraceptive calendar information. Stillbirth rates from surveys were also  
12 calculated if a survey provided a complete birth history along with other stillbirth data, either in the  
13 form of a stillbirth option listed as an outcome in the complete birth history, or a total number of live  
14 births and stillbirths with a shared recall period.

15 If microdata were unavailable, stillbirth rates were instead extracted from survey reports where  
16 available.

### 17 [Literature](#)

18 We completed a literature review to supplement the literature sources listed in the Blencowe web  
19 appendix.<sup>14</sup> We modified the search string provided by Blencowe et al<sup>14</sup> to exclude the limitations on  
20 locations.

21 ((stillbirth[MeSH Terms] OR stillbirth[All Fields] OR (still[All Fields] AND birth[All Fields]) OR still  
22 birth[All Fields]) OR (foetal death[All Fields] OR fetal death[MeSH Terms] OR (fetal[All Fields]  
23 AND death[All Fields]) OR fetal death[All Fields]) OR (perinatal mortality[MeSH Terms] OR  
24 (perinatal[All Fields] AND mortality[All Fields]) OR perinatal mortality[All Fields]) AND (timing[All  
25 Fields] OR rate[All Fields] OR epidemiology[Subheading] OR epidemiology[All Fields] OR  
26 prevalence[All Fields] OR prevalence[MeSH Terms] OR incidence[All Fields] OR incidence[MeSH  
27 Terms]))

28 We searched PubMed on March 3, 2016 and limited the results to January 20, 2015 through March 3,  
29 2016 to bring the Blencowe search up to date. The initial query of PubMed returned 1,511 results which  
30 were reviewed based on their title and abstract. Of the 131 sources selected for full text review, 25 had  
31 usable data for stillbirth rate. We set broad exclusion criteria to include as many studies as possible.  
32 Sources were excluded if they covered a limited subpopulation (e.g., high risks mothers, or exclusively  
33 triplet pregnancies), if the study didn't provide information about stillbirth rate or was otherwise  
34 irrelevant (e.g., covered non-human populations), or if the study didn't contain primary data (e.g., meta-  
35 analyses). We extracted stillbirth rate and neonatal mortality rate from the 25 included sources.

### 36 [Section 2.3.2. Stillbirth Modeling Strategy](#)

37 We used a mixed effects generalized linear model to predict, in natural logarithmic space, the ratio of  
38 the stillbirth rate from the data sources described above to the neonatal mortality rate generated in the  
39 under-5 age pattern model discussed in section 2.2.12. The model included fixed effects on maternal  
40 education; random effects on location, location-source, and smoothed neonatal mortality classified into

1 20 bins; and dummy variables on stillbirth definition and data type in order to account for systematic  
 2 differences in these variables. In order to account for a nonlinear relationship between neonatal  
 3 mortality rate and the ratio between neonatal mortality rate and stillbirth rate, we ordered observations  
 4 by neonatal mortality rate, split the observations into twenty bins with an equal number of  
 5 observations, ran the model using the lme4 package in R, and put the resulting random effect estimates  
 6 through a loess smoothing process to generate random effects for all neonatal mortality rates rounded  
 7 to the hundredths place.

8 The model is below:

9

$$10 \quad \log \left( \frac{SBR}{NMR} \right) = (\beta_1 * education_{cy}) + \alpha_{definition} + \alpha_t + \gamma_{nmr} + \gamma_c + \gamma_{cs} + \epsilon_{cys}$$

11

12 Where c is country, y is year, s is source, and t is source type; each source was categorized into one of 5  
 13 source types across all countries; each observation was categorized into 8 definitions, as listed in the  
 14 tables below. Additionally, *SBR* is stillbirth rate; *NMR* is neonatal mortality rate; *education* is mean years  
 15 of education for women of reproductive age (15-49 years); *definition* is the stillbirth definition (see table  
 16 below)  $\beta$  is a fixed covariate coefficient;  $\alpha$  is a fixed effect dummy variable;  $\gamma$  is a random effect; and  $\epsilon$  is  
 17 the residual.

18 **Table: Source classifications for stillbirth model**

| Stillbirth Data Source Type   |
|-------------------------------|
| Complete vital registration   |
| Incomplete vital registration |
| Survey sources                |
| Literature sources            |
| Government reports            |

19

20 The completeness of VR systems was determined according to the child mortality completeness  
 21 described in section 2.2.1.

22

23 **Table: Definition classifications for stillbirth model**

| Stillbirth Definition                                     | Adjustment factor – developed locations | Adjustment factor – other locations |
|-----------------------------------------------------------|-----------------------------------------|-------------------------------------|
| Foetal death after 28 weeks of gestation                  | 1                                       | 1                                   |
| Foetal death after 26 weeks of gestation                  | 0.86                                    | 0.89                                |
| Foetal death after 24 weeks of gestation                  | 0.72                                    | 0.89                                |
| Foetal death after 22 weeks of gestation                  | 0.68                                    | 0.89                                |
| Foetal death after 20 weeks of gestation                  | 0.46                                    | 0.89                                |
| Foetal death where the foetus weighs at least 1,000 grams | 1.15                                    | 1                                   |
| Foetal death where the foetus weighs at least 500 grams   | 0.68                                    | 0.89                                |
| No definition given                                       | 0.68                                    | 0.89                                |



1 For this analysis, we chose complete VR, if available, as the reference source in prediction. If no  
2 complete VR was available, we designated survey sources as reference, using the survey beta fixed  
3 effect and the average of the country-source random effects for each survey if there was more than one  
4 survey per location. For locations with neither complete VR data nor survey data, we used the average  
5 of complete VR and survey for the fixed effects and used a country-source random effect of 0. For  
6 locations with both complete VR and survey sources, we used the source for which we had the longer  
7 time-series of data as a reference in prediction. Going along with the WHO standard definition as well as  
8 the work of Blencowe et al.,<sup>14</sup> we designated 28 weeks as the reference definition.

9  
10 As mentioned above, each data source has a source-specific random effect as well as a source-type fixed  
11 effect. The reference sources are designated above, and we adjust all the other sources by including  
12 these reference values for the random and fixed effects values instead of those estimated for each  
13 individual source. Going along with the work of Blencowe et. al.,<sup>14</sup> data are multiplied by an adjustment  
14 factor based on stillbirth definition designated in the table above. This first stage model is shown below.

15

$$16 \quad \text{adjusted data} = \text{data} \times k_{def} + (re_{ref,cs} + fe_{ref,t} + fe_{ref}) - (re_{cs} + fe_t)$$

17

18 Where k is a definition – specific constant; fe is a fixed effect, re is a random effect; ref is the reference  
19 value of each fixed or random effect; def is the stillbirth definition; t is the source type; and cs is the  
20 country-source random effect. We use these adjusted data and the predictions without source type  
21 fixed effects or country source random effects as priors to input into our spatio-temporal smoothing,  
22 which is detailed in section 2.2.6. Briefly, for each country-year, we weighted data points in the region  
23 based on the proximity of those data points to the country-year in space and in time, giving a certain  
24 proportion of weight to in-country residuals and to in-region (out-of-country) residuals based on data  
25 density of each country. We designated  $\lambda$ , the parameter that designates how quickly the weights  
26 decrease with time, also based on data density of each location. To predict the residuals, we combined a  
27 Loess-like linear fit using weighted data and a weighted average of our data. The smoothed residuals are  
28 added back to the predictions generated without source type fixed effects or country source random  
29 effects in order to generate stage two predictions. We used Gaussian Process Regression (GPR) to  
30 generate the third stage final estimates. GPR was discussed in depth in section 2.2.6 of this appendix.  
31 The parameters used were selected based on data density of each country.

32

## 33 [Section 2.4. Adult mortality](#)

### 34 [Section 2.4.1. Data sources](#)

#### 35 [Adult population estimates](#)

36 To calculate adult mortality rate using household death recall, age specific populations in age group 15  
37 to 59 from the corresponding survey or census sources are used. This is also true in calculating adult  
38 mortality rate using reported deaths from Sample Registration System from India and Disease  
39 Surveillance Point system from China. For data from VR systems, we currently have two major sources  
40 for population in the corresponding age groups:

- 1 1. Population estimates from the World Population Prospect 2015 Revision by the United Nations
- 2 Population Division. This provides majority of the population estimates used in GBD2015.
- 3 2. For the 37 countries covered by the Human Mortality Database, we use population exposure
- 4 from this source instead of WPP2015.

5  
6 For subnational locations, interpolation and extrapolation based on rate of change are used together  
7 with age specific population from censuses. Raking is applied to ensure consistency between  
8 subnational and national populations.

#### 9 [VR/SRS/DSP](#)

10 See section 2.2 descriptions of VR sources for information on how VR, SRS, and DSP data are identified  
11 and prioritized.

#### 12 [Household recall of deaths](#)

13 Household recall is ascertained from large survey series such as the Malawi 2010 DHS. A survey series  
14 must include a module asking about the number of deaths of household members within a given recall  
15 time period, along with a list of household members who have not died over this period of time. In  
16 addition, these survey series must be considered nationally representative, include survey weights (if  
17 applicable), and include the sex and age (either current or at death) of all household members.

#### 18 [Sibling survival histories](#)

19 Data for sibling survival histories are primarily taken from large survey series in which respondents are  
20 asked about the status of their siblings, alive and dead. Some examples of sibling survival history sources  
21 include the Laos 2011-12 Multiple Indicator Cluster Survey and many DHS sources. To generate  
22 estimates of sibling survival, each questionnaire must contain a module with a full accounting of all  
23 siblings (children born to the same mother) of all respondents, along with data on the year of death (if  
24 applicable), sex, and age at death or year of birth. Additionally, the surveys must not have significant  
25 missingness in terms of responses to the sibling survival history module, as was the case in certain  
26 surveys such as the Mexico Health and Aging Study 2012.

#### 27 [Section 2.4.2 Completeness Assessment: Death Distribution Methods and completeness estimates](#) 28 [synthesis](#)

29 Vital registration systems may not capture all adult deaths. It is important to assess the quality, or in  
30 other words, the completeness, of available VR data. Demographers have long been applying a suite of  
31 death distribution methods (DDMs) including generalized growth balance (GGB), synthetic extinct  
32 generation (SEG), and a combined approach (GGBSEG) to assess completeness.<sup>3,15-18</sup> These methods  
33 compare the age distribution of the population recorded in two censuses with the age distribution of  
34 deaths recorded between these two censuses and attempt to estimate completeness of VR.  
35 Recent modifications of these DDM methods provide estimates of completeness that, based on careful  
36 simulation studies, are more accurate and robust than traditional methods; nevertheless, these  
37 methods generate completeness estimates with substantial uncertainty intervals.<sup>19</sup>

38

1 For the GBD study, the process for estimating completeness of death registration for adults is based on  
2 estimates of adult completeness from three death distribution methods updated by Murray and  
3 colleagues in 2010 as well as information about child completeness.<sup>19</sup> These two sources of information  
4 are combined to generate a series of estimates of source- and country-specific adult death registration  
5 completeness from 1970 to 2015. The underlying assumption of this process is that completeness of  
6 systems will change gradually, and consequently, assessments of completeness for a given year should  
7 be informed by DDM estimates for prior and future years in that country. Further, completeness is likely  
8 to be similar among countries within a region, and we can inform estimates of completeness with levels  
9 of completeness estimated for countries in the same region or super-region by borrowing strength over  
10 space as well as time. To do this, we use a two-stage model, whereby we first predict adult  
11 completeness based on child completeness and then use a spatial-temporal regression model to  
12 incorporate information about adult completeness from the application of DDM methods.

13 Child completeness is calculated as the ratio of observed child mortality to estimated child mortality for  
14 a given source, country, and year. For a particular country-source, estimates of child completeness are  
15 only available for years where that data source is present, but a complete time series of child  
16 completeness estimates is produced based on a smoothing process. For country sources with no more  
17 than three years of data, a constant level of child completeness at the level of the mean of those years  
18 that are available is assumed. For country sources with more than three years of data, Loess regression  
19 is used to fill in the time series. In order to be conservative in our out-of-sample estimates of child  
20 completeness, instead of using the Loess predictions to forecast and backcast we simply hold child  
21 completeness constant before the first observation and after the last observation. Additionally, when  
22 there is a gap of more than five years we linearly interpolate between the observations on either side of  
23 this gap instead of using the Loess predictions to fill in these years.

#### 24 [Section 2.4.3. Sibling survival method](#)

25 In countries where sources including vital registration and household death recall are scarce, sibling  
26 histories provide important information on the levels and trends of adult mortality rates. However, as  
27 studies have shown, estimates of adult mortality rate using sibling survival modules have significant  
28 biases resulting from the design and implementation of the method. Specifically, there are four different  
29 types of biases: selection bias (under representation of siblings from high mortality sibships), zero  
30 reporter bias (sibships not represented in the survey due to sex composition and/or mortality level of a  
31 sibship), sparse data, and recall bias (generally under reporting of death of siblings living in different  
32 places or have died a while back). For the Global Burden of Disease Study, we have greatly improved the  
33 methods used for sibling survival. The sibling survival technique employed in the current iteration of  
34 GBD is largely based on the work by Obermeyer et al.<sup>20</sup> with a few improvements to their methods: (1)  
35 use of appropriate survival weights that account for the study design; (2) implementation of a correction  
36 to account for the mortality experience of families not represented because none of the siblings were  
37 alive and eligible to respond to the survey; and (3) refinements for adjusting for recall bias. We validated  
38 these methodological developments in a range of simulation environments, and we have also developed  
39 ways of adjusting for recall bias and handling sparse data in survey designs where the age range of the  
40 respondents is narrower than the age range desired for estimation.<sup>20</sup>

41

1 Selection bias refers to the underrepresentation of high mortality sibships in the sample population—  
 2 sibships with higher rates of mortality are less likely to be represented in the survey because fewer of  
 3 them are likely to have survived to be selected into the sample. A method to correct for this  
 4 underrepresentation, proposed by Gakidou and King,<sup>21</sup> incorporates a sibship-level weight,  $W_j = B_j/S_j$ ,  
 5 where  $B_j$  is the original sibship size and  $S_j$  is the number of siblings in sibship  $j$  who survive to the time of  
 6 the survey. When each observation in the dataset being analyzed is at the sibship level, this Gakidou-  
 7 King (GK) weight can be used to compute a weighted average of the proportions of siblings deceased as  
 8 reported by each respondent. In the absence of any sibships where all siblings have died, this correction  
 9 algebraically corrects for the underrepresentation of high-mortality sibships in the survey sample.

10 When the dataset is expanded to the sibling level (i.e., one observation for each sibling as opposed to  
 11 sibship), the number of observations listed in the dataset for each sibship corresponds to the original  
 12 sibship size,  $B_j$ , and so the numerator of  $W_j$  is already accounted for. The resulting sibling-level weight is  
 13 therefore  $W_i = 1/S_j$  for sibling  $i$  in sibship  $j$ .<sup>22,23</sup>

14 Since the analysis reported here is carried out at the sibling level, we use  $W_i$  rather than  $W_j$ . This  
 15 improves on previous applications of the method where the sibship-level weight was inappropriately  
 16 applied to data that had been expanded to the sibling level.

17 Further, the number of surviving siblings in the family must also be tailored to the eligibility criteria for  
 18 respondents of the given survey.<sup>22</sup> In applying Gakidou and King’s elucidation of the survivorship  
 19 correction,  $S_j/B_j$  represents the probability that a sibling in sibship  $j$  survives and is eligible to be selected  
 20 in the survey. For Demographic and Health Surveys (DHS), respondents must be women between the  
 21 ages of 15 and 49 and so the  $S_j$  in this case would be the number of surviving women in a sibship  $j$  who  
 22 are between the ages of 15 and 49 at the time of the survey. In this analysis, the value of  $S_j$  has been  
 23 chosen to be consistent with the eligibility criteria of each survey.

24 The sampled population excludes sibships in which there are not any eligible siblings to respond to the  
 25 surveys; thus, we cannot report on the mortality experiences of these siblings. The zero-survivor  
 26 correction estimates the number of sibling deaths that are missing from the sample by age and sibship  
 27 size, and then adds these siblings to the observed sample before calculating age-specific mortality rates.  
 28 This correction is applied to sibships with one or two females. The correction uses the relationship  
 29 between the true number of sibships with one (or two) females and the cumulative probability of dying  
 30 before the time of the survey to estimate the number of missing sibling deaths. For one-sibling sibships,

31

$$32 \quad K_{obs}^1 = K_{true}^1 * (1 - aq_0^1)$$

$$33 \quad K_{miss}^1 = K_{true}^1 * aq_0^1$$

34

35 Where  $K_{obs}^1$  is the number of sibships with one sister that are observed in the sampled population;  
 36  $K_{true}^1$  is the true number of sibships with one sister in the population;  $K_{miss}^1$  is the number of sibships  
 37 with one sister that are not represented in the sampled population due to zero-survivor bias;  $aq_0^1$  is the

1 cumulative probability of death for five-year age-group  $a$ ; and  $(1 - {}_a q_0^1)$  is the probability that the sister  
2 has survived to the time of the survey.

3 From these two equations, it follows that the number of sibships with only one sister that are not  
4 represented in the population due to zero-survivor bias is equal to:

$$5 \quad K_{miss}^1 = \frac{K_{obs}^1}{1 - {}_a q_0^1} * {}_a q_0^1$$

6 We multiply this estimate of the number of missing sibships by the number of females in the sibship  
7 (which in this case is one) to get an estimate of the number of females in each age group that are  
8 missing from the sample because they have died. We then expand this number so that we have one  
9 observation per missing sibling, assign birth and death dates to these missing siblings based on the  
10 distribution in the observed siblings, and append them to our existing dataset. This process is also  
11 carried out for families with two sisters:

$$12 \quad K_{obs}^2 = K_{true}^2 * (1 - {}_a q_0^1 * {}_a q_0^2)$$

$$13 \quad K_{miss}^2 = K_{true}^2 * {}_a q_0^1 * {}_a q_0^2$$

$$14 \quad \therefore K_{miss}^2 = \frac{K_{obs}^2}{1 - {}_a q_0^1 * {}_a q_0^2} * {}_a q_0^1 * {}_a q_0^2$$

15 Where  $K_{obs}^2$  is the number of sibships with two sisters that are observed in the sampled population;  
16  $K_{true}^2$  is the true number of sibships with two sisters in the population;  $K_{miss}^2$  is the number of sibships  
17 with two sisters that are not represented in the sampled population due to zero-survivor bias;  ${}_a q_0^1$  is the  
18 cumulative probability of death for the first sister in five-year age-group  $a$ ;  ${}_a q_0^2$  is the cumulative  
19 probability of death for the second sister in five-year age-group  $a$ . If there is only one sister within the  
20 15 to 49 age range, the equations are different than above because the second sister does not  
21 contribute to the probability of the sibship being observed in the sample:

$$22 \quad K_{obs}^2 = K_{true}^2 * (1 - {}_a q_0^1)$$

$$23 \quad K_{miss}^2 = K_{true}^2 * {}_a q_0^1 * {}_a q_0^2 + K_{true}^2 * {}_a q_0^1 * (1 - {}_a q_0^2)$$

$$24 \quad \therefore K_{miss}^2 = \frac{K_{obs}^2}{1 - {}_a q_0^1} * {}_a q_0^1 * {}_a q_0^2 + \frac{K_{obs}^2}{1 - {}_a q_0^1} * {}_a q_0^1 * (1 - {}_a q_0^2)$$

25 Both this analysis and Obermeyer et al. take into account time prior to the survey in the logistic  
26 regression to model mortality.<sup>20</sup> This current analysis, however, provides an updated method for recall  
27 bias adjustment. After 45q15 has been estimated for each of the four surveys, the estimates are  
28 combined and paired up for all periods where they overlap. This overlap occurred when there were at  
29 least two surveys carried out in the same country within 15 years of each other. In GBD 2013, we  
30 estimated adult mortality from sibling histories for three five-year periods prior to the survey date. This  
31 was changed in GBD 2015 – and continued for GBD 2016 – where single-year 45q15 estimates from  
32 sibling survival were generated using the same methodology to account for the changing level and

1 trends of 45q15 within the 15-year period covered by sibling survival module. This generates pairs of  
 2 estimates in years where there are overlapping surveys. For each of these pairs, we calculate the  
 3 difference in the years of recall as the interval between when the two surveys were conducted and we  
 4 also calculate the magnitude of the difference between the two estimates of 45q15. We then estimate  
 5 the linear regression model shown in the below equation to quantify the relationship between years of  
 6 recall and level of mortality separately for each sex of sibling:

$$7 \quad \Delta(45q15)_{i,j} = \beta * \Delta(\text{survey date})_{i,j} + \xi$$

8 Where  $\Delta(45q15)_{i,j}$  is the difference in 45q15; and  $\Delta(\text{survey date})_{i,j}$  is the difference in survey date for  
 9 survey pair  $j$  in country  $i$ . Upper and lower uncertainty intervals were also derived. The coefficient on  
 10 recall period represents the effect of recall bias and was used to adjust the 45q15 estimates to account  
 11 for that bias.

#### 12 Section 2.4.4. Completeness data synthesis

13 Once we have obtained a full series of under-5 completeness estimates for each country source we fit  
 14 the model described in the equation:

$$\log_{10}(c_{i,s,t}^{\text{adult}}) = \alpha + \beta_1 * \log_{10}(c_{i,s,t}^{\text{child}}) + \gamma_1^{\text{SR}} + \gamma_2^{\text{SR}} * \log_{10}(c_{i,s,t}^{\text{child}}) \\ + \gamma_1^{\text{R}} + \gamma_2^{\text{R}} * \log_{10}(c_{i,s,t}^{\text{child}}) + \eta_{i,s} + \xi_{i,s,t}$$

15 Where  $c_{i,s,t}^{\text{adult}}$  is completeness of adult deaths registration in country  $i$ , source  $s$ , at time  $t$ ;  $c_{i,s,t}^{\text{child}}$  is  
 16 completeness of child deaths registration in country  $i$ , source  $s$ , at time  $t$ ;  $\gamma$  terms are random effects at  
 17 the region (R) and super-region (SR) level;  $\eta_{i,s}$  is a random effect at the country and source level; and  
 18  $\xi_{i,s,t}$  is an error term. This model relates adult completeness to under-5 completeness and includes  
 19 super-region and region-level random effects to allow for differences in both the average level of adult  
 20 completeness and the relationship between child and adult completeness at these levels. The country-  
 21 source random effect captures the fundamental difference in level of completeness between different  
 22 data sources.

23 A  $\log_{10}$  transformation is employed to make over- and under-completeness symmetric (e.g., 50%  
 24 complete and 200% complete are symmetric around 0 when  $\log_{10}$  transformed) and to simplify  
 25 calculation of the variance of completeness estimates in  $\log_{10}$  space, which is needed for the adult  
 26 mortality estimation process. Also, to avoid allowing outlying DDM-derived estimates of adult  
 27 completeness from unduly influencing the predictions from the model in the equation above, for any  
 28 given set of three DDM estimates (GGB, SEG, GGBSEG) calculated from a single pair of censuses, the  
 29 estimate that is furthest from 1 (i.e., complete) is excluded.

30 For each country-source  $\log_{10}(c_{i,s,t}^{\text{adult}})$  is predicted from coefficients estimated in the model above and  
 31 child completeness. Not every country can be used to fit this model as DDM cannot be applied in some  
 32 cases due to lack of appropriate census data. However, because the coefficients used for prediction are  
 33 at the region and super-region level, predictions from this model can be generated for all countries  
 34 where estimates of child completeness are available. We do not believe that the same relationship  
 35 between adult and child completeness exists for registration-based sources as for recall-based sources,

1 so the above model is applied only to registration-based sources (primarily VR data but also sample  
2 registration systems). For sources that only include household death recall, we set an arbitrary value of  
3 1 for the first stage values instead of making predictions from completeness from child age groups for  
4 the aforementioned reason. However, it should be noted that this set value by no means reflects the  
5 true completeness of adult age groups in the household death recall sources and it will change once we  
6 apply the spatial-temporal regression in the second-stage estimation.

7 In the second stage, we calculate the residuals from the first stage and apply spatial-temporal  
8 smoothing to these residuals. The predicted residuals are then added back onto the first-stage  
9 predictions, generating the second-stage predictions. Spatial-temporal smoothing is carried out in the  
10 same way as in the adult mortality estimation process with three modifications: the  $\lambda$  and  $\zeta$  parameters  
11 are set to 2.0 and 0.95; only the fixed effect local regression variant is used; and the residuals are not  
12 held constant out of sample. The registration-based sources and the non-registration-based sources are  
13 handled separately in this step.

14 The variance of the completeness estimates must also be calculated, as this information is utilized in the  
15 adult mortality estimation process. To do this, we approximate the variance based on the median  
16 absolute deviation (MAD) compared to the second-stage estimates. We calculate variances at the  
17 regional level and do so separately for registration-based sources and other sources. Then, for each  
18 country-source-year, we generate 10,000 simulations from a normal distribution with mean equal to the  
19 second-stage prediction for that year and variance calculated as just described. For non-registration-  
20 based sources we believe that both under- and over-reporting are possible (over-reporting may occur  
21 due to telescoping of events outside of the recall period into the recall period), and so for these sources  
22 we now exponentiate the 10,000 simulations and find the mean, which serves as the final prediction for  
23 completeness. For registration-based sources we believe that only underreporting is possible, so for  
24 these sources we first truncate any simulations above 1 to 1 and then exponentiate the 10,000  
25 simulations to find the truncated mean, which will serve as the final prediction for completeness. In  
26 both cases, before exponentiating the simulations, the variance of the simulations is calculated, and  
27 used as the variance of the completeness estimates in the adult mortality estimation process.

28 The final completeness estimates are used to adjust, where appropriate, the corresponding country-  
29 source-years before these data are used in the adult mortality estimation process. For countries in  
30 which we believe males and females have differential completeness, we carry out the above process  
31 separately by sex. For a small number of data points, completeness cannot be estimated using the  
32 procedure described above due to a lack of appropriate census data, and the original growth balance  
33 method is the only viable option.<sup>12</sup> In previous papers, we have included a selected number of data  
34 points derived from household recall of deaths to which the Brass growth balance method had been  
35 applied. Our simulation studies suggest this method is extremely imprecise, so we have excluded these  
36 points from the analysis. This accounts for why the number of household recall of deaths data points has  
37 decreased in this analysis compared to Lozano et al.<sup>24</sup>

## 1 Section 2.4.5. 45q15 data synthesis using non-linear mixed effects model and ST-GPR

### 2 Overview of adult (45q15) mortality estimation

3 For each country, we generated a time series of 45q15 estimates. We modeled the underlying mortality  
4 risk separately from excess mortality due to fatal discontinuities. To model the underlying mortality risk  
5 we relied on a three-stage process that incorporates all data in our database for each country after  
6 excluding data identified as outliers or that refer to years identified to contain mortality shocks from  
7 conflict or natural disaster. In the first stage, we applied a nonlinear mixed effects model which used  
8 covariates to explain variation in 45m15. In the second stage, we exploited spatial and temporal  
9 correlation in the residuals from the first stage regression by performing a smoothing process on these  
10 residuals. The smoothed residuals were then added back into the first stage regression predictions to  
11 produce an updated time-series of 45q15 for each country. In the third stage, we applied Gaussian  
12 process regression (GPR) which synthesizes information from the second stage predictions and the  
13 observed data. After applying this procedure to generate estimates of the underlying mortality risk, we  
14 modeled abrupt changes in mortality by estimating the excess risk of mortality in years identified as  
15 containing a conflict or natural disaster. This estimated excess mortality risk was then added to the  
16 underlying mortality risk to produce our final time series of 45q15 estimates. All analyses were carried  
17 out in Stata 13.1, R 3.0.2, and the PyMC package, version 2.0, in Python 2.5.4. A more complete  
18 description of the various stages of our modeling strategy is given below.

### 19 First stage nonlinear mixed effects regression

20 The first stage nonlinear regression models country/year/sex-specific adult mortality rate using key  
21 covariates: lag-distributed GDP per capita, mean years of education in age group 15 to 59, and crude  
22 death rate due to HIV/AIDS in age group 15 to 59. We use the nonlinear mixed effects model specified in  
23 the equation below. This model was fit separately for males and females.

$$24 \quad {}_{45}m_{15}^{\text{observed}} = \exp(\beta_1 + \beta_2 \cdot \text{Edu} + \beta_3 \cdot \ln(\text{LDI}) + \gamma_{\text{country}}) + \beta_4 \cdot \text{HIV} + \varepsilon$$

25 Edu is the mean years of education for the age group 15 to 59; LDI is lag-distributed income;  $\gamma_{\text{country}}$  is a  
26 country-level random effect; and HIV is the crude mortality rate from HIV for ages 15 to 59. We  
27 initialized the model with starting values for each of the  $\beta$  coefficients equal to 0. We tested our model  
28 with different starting values, including values from a hierarchical linear mixed effects model, and found  
29 that this model was not sensitive to starting values.

30 The final stage one predictions were based on predictions from the model, the above equation  
31 excluding the country random effect. We excluded the country random effect to facilitate modeling  
32 spatial trends in mortality in the second stage. The model predictions were then converted from 45m15  
33 to 45q15 to be put into the second stage model described next.

### 34 Second stage spatial-temporal smoothing of residuals

35 The first stage regression model reflects the explanatory power of the set of covariates but, as might be  
36 expected, fails to explain all of the variation in 45q15. The residuals from the first stage regression are  
37 correlated in both time and space, indicating that 45q15 is correlated in time and space in ways that are  
38 not fully captured by the covariates included in this regression. We exploited this remaining pattern of



1 variation by applying a local regression to the residuals from the first stage regression, effectively  
 2 smoothing across time and space.

3 The local regressions were fitted separately for each of the 21 GBD regions which have been constructed  
 4 so that countries within each region share similar epidemiological profiles.<sup>25</sup> We applied two variations  
 5 of local regression to the first stage residuals, both of which utilized the same weighting scheme to  
 6 incorporate temporal and spatial relatedness. In both variants, a set of weighted linear regressions, one  
 7 for each country-year of interest, were undertaken. When carrying out the regression for a given  
 8 country-year of interest, all residuals in the dataset were weighted with respect to this country and year.  
 9 We first weighted residuals with respect to time using a weighting function similar to that utilized in  
 10 Loess regression:

$$11 \quad w_t = \left( 1 - \left( \frac{|r_t - r_{est}|}{1 + \operatorname{argmax}_t |r_t - r_{est}|} \right)^\lambda \right)^3$$

12 The  $r_t$  and  $r_{est}$  terms are, respectively, the year of interest and the year of the residual being weighted.  
 13 The  $\operatorname{argmax}_t |r_t - r_{est}|$  term is the maximum distance between the year of interest and a residual within  
 14 the region. The  $\lambda$  parameter in this weighting function dictates how quickly the weights fall off as the  
 15 distance in time increases: a larger  $\lambda$  implies that the assigned weights will diminish slowly with time,  
 16 while a smaller  $\lambda$  allows the weights to diminish more rapidly with time.

17 We then weighted residuals with respect to space by modifying the time weights described below.  
 18 Weights for residuals within the country of interest were multiplied by a factor of:

$$19 \quad \frac{\zeta \sum_{i \notin c_{est}} w_i}{(1 - \zeta) \sum_{i \in c_{est}} w_i}$$

20 where  $c_{est}$  is the country of interest and  $w_i$  are the time weights described above. As a result of this  
 21 modification,  $100 \cdot \zeta$  % of the total weight was placed on residuals within the same country, and the  
 22 remaining  $100 \cdot (1 - \zeta)$  % of the weight was placed on residuals from other countries in the region. For  
 23 countries with no residuals (i.e. countries with no data) the above factor is 0 and there was no re-  
 24 weighting: all of the weight consequently remains, by necessity, in other countries in the region. We set  
 25  $\lambda$  and  $\zeta$  based on data density of each location.

26 The first local regression variant, which we call linear local regression, is described below and is a  
 27 weighted linear regression of the residuals on year and an indicator of the residual from the country  
 28 currently being estimated (if this indicator cannot be estimated, i.e. because there are no residuals in a  
 29 given country, it is dropped):

$$30 \quad r_{est} = \beta_0 + \beta_1 t + \beta_2 c_{est} + \mathcal{E}$$

31 The second variant, which we call fixed effects local regression, used a weighted linear regression with  
 32 no covariates. This is equivalent to a simple weighted average of the residuals.

33 Linear local regression incorporates information from covariates, in this case year, but extrapolation is  
 34 heavily based on this covariate and in settings with sparse data this can result in implausible out-of-

1 sample predictions. In contrast, fixed effects local regression does not incorporate an explicit time-trend  
 2 and does not suffer from this problem in extrapolation, but also is less adequate at fitting the data in  
 3 countries with many observations. We therefore chose to combine the estimates from both variants. As  
 4 described in the below equation, we calculated the data density,  $d_c$ , for each country we estimated,  $c_{est}$ ,  
 5 and then calculated a weighted average of the predictions from the linear local regression and fixed  
 6 effects local regression where  $d_c\%$  of the weight is assigned to the linear local regression and the rest to  
 7 the fixed effects local regression. In this way, the final estimates for countries with more VR data are  
 8 more heavily informed by the linear local regression and the final estimates for countries with less (or  
 9 no) VR data are predominantly informed by the fixed effects local regression, as is appropriate given the  
 10 strengths and weaknesses of these two variants.

$$11 \quad d_c = 100 * \left( \frac{\text{\# VR points in } c_{est}}{\text{Maximum \# VR points in any country in the region}} \right)$$

12 Residuals were logit-transformed before undergoing this smoothing; once the final estimates of the  
 13 smoothed residuals were obtained for every country-year, these estimates were added back into the  
 14 logit transform of the first stage regression predictions. This sum was then reverse-logit transformed; by  
 15 carrying out the first two stages in logit-space we restricted the predictions to between 0 and 1. These  
 16 predictions are called the second-stage predictions.

### 17 Model

18 The third stage of our prediction method is a Gaussian process regression (GPR) based on the model  
 19 given in below where  $\mu_t$  is the true  $\log_{10}(45q15)$  at time  $t$ ,  $f(t)$  is the baseline mortality risk, and  $S_t$   
 20 captures excess mortality due to war and disasters.  $S_t$  is estimated independently of  $f(t)$  as described in  
 21 a later section.  $M$  and  $C$  describe the Gaussian process, giving the mean and covariance, respectively.

$$22 \quad \mu_t = f(t) + S_t$$

$$23 \quad f(t) \sim \text{GP}(M, C)$$

24 For the Dominican Republic, Peru, and Madagascar, a slightly different model, described in the equation  
 25 below, is used. For these countries, measurements from sibling histories and from VR are at different  
 26 levels and the direction of the bias in each source is unknown. We therefore used a model which  
 27 includes a bias term for each source ( $\beta_s$ ).

$$28 \quad \mu_t = f(t) + \beta_s + S_{t,s}$$

$$29 \quad \beta_s \sim \text{Normal}(0, 0.01^2)$$

$$30 \quad f(t) \sim \text{GP}(M, C)$$

31 Gaussian process regression is a method of Bayesian inference. We specified a prior distribution for  $f(t)$ ,  
 32 and a likelihood function which describes the data generation process; the specified prior distributions  
 33 and likelihood function are described in subsequent sections. We then used Markov Chain Monte Carlo  
 34 (MCMC) to approximate the posterior distribution of  $f(t)$  which also incorporates information from the  
 35 observed empirical estimates of adult mortality. An MCMC chain of length 5,000 was produced; the first  
 36 3,000 samples were discarded and the remaining 2,000 were thinned by a factor of 2 for a total of 1,000

1 simulations retained. The reported best estimates and confidence intervals were generated from the  
 2 mean and the 2.5<sup>th</sup> and 97.5<sup>th</sup> percentiles of the 1,000 samples, respectively.

### 3 Priors

4 The prior distribution of  $f(t)$  can be described in terms of the mean prior—the prior for  $M$ —and the  
 5 covariance prior—the prior for  $C$ . We utilized the second stage predictions as the mean prior and used a  
 6 Matérn covariance function to describe the covariance prior. This covariance function incorporates  
 7 three parameters: the amplitude, which controls the amount by which realizations of the Gaussian  
 8 process distribution can deviate from the mean function, the scale, which controls the distance over  
 9 which the function is correlated, and the degree of differentiability, which influences the smoothness of  
 10 the samples from the Gaussian process. These parameters are selected in the parameter selection  
 11 process described below.

### 12 Likelihood

13 The likelihood describes the probability of observing the data given a particular set of parameters. As  
 14 shown in the below equation, we used a normal model for describing the probability of observing a  
 15 particular value of  $\log_{10}(45q_{15})$  where the mean is given by  $f(t)$  and the variance by  $V_t$ , the data variance.

$$16 \log_{10}(45q_{15t}) \sim \text{Normal}(f(t), V_t)$$

17 Data variance was calculated for each empirical observation of 45q15 and incorporated both sampling  
 18 and non-sampling variation. The method for calculating the data variance depended on the type of data.  
 19 We computed sampling variance from a binomial model. We set  $N$  equal to the national population aged  
 20 15 to 59 years and  $p$  equal to the mortality rate, 45m15. We calculated the variance of 45m15 from  $p(1-$   
 21  $p)/N$  and then transformed this to the variance of  $\log_{10}(45q_{15})$  using the delta method. For estimates  
 22 derived from both complete and incomplete VR data, we wanted to include not only sampling variance  
 23 but also the non-sampling variance that arises from uncertainty in the completeness estimate. For these  
 24 data, the total data variance was given by the sum of the sampling variance (calculated as for complete  
 25 VR data) and the variance of the completeness estimate (calculated as described in section 2.2.6).

26 For estimates derived from sibling history, census, or survey data, the median absolute deviation (MAD)  
 27 estimator of the variance was calculated by source type with reference to the second stage predictions,  
 28 as described in the equation, where  $s$  is the source type (sibling history, census, or survey):

$$29 \theta_s^2 = (1.4826 \cdot \text{MAD}_s)^2$$

$$30 = 1.4826$$

$$31 \cdot \text{median} \left( \left| \log_{10}(45q_{15}^{\text{observed}}) - \log_{10}(45q_{15}^{\text{predicted}}) \right| \right)$$

$$32 - \text{median} \left( \log_{10}(45q_{15}^{\text{observed}}) - \log_{10}(45q_{15}^{\text{predicted}}) \right) \Big|^2$$

### 34 Hyper-parameter selection for adult mortality rate ST-GPR

35 Similar to the new parameter selection process for U5MR, we have also expanded the scope of our  
 36 parameter selection for adult mortality rate (45q15) to include variables used in space-time smoothing.

1 The out-of-sample predictive validity testing used to select space-time and GPR parameters for adult  
2 mortality rate follows.

3 For space-time smoothing, we used  $\zeta$  values based on data density, assigning higher values to locations  
4 with more years of data. We tested  $\lambda$  values of 0.1 to 0.9 in increments of 0.1. We test five values of the  
5 scale—5, 7.5, 10, 12.5, 15, 17.5, 20 -- and five values of the squared amplitude—1, 1.5, 2, 2.5, and 3  
6 times the mean squared error of the residuals from the second-stage prediction model.

7 We divided the data into testing and training sets 100 times. Data were divided as follows: for each  
8 region, a number X between 10 and 20 was sampled and the most recent X years of data in that region  
9 were assigned to the testing set. Then a number N between 5 and 10 was sampled, a country from  
10 within the region was sampled, and a year where there is data in that country was sampled. All data  
11 within N years of the selected year in the selected country were assigned to the testing set. This was  
12 repeated as many times as there are countries in the region; because iterations of this procedure were  
13 independent, the data selected for the testing set may overlap. Any data that were not selected for the  
14 testing set were included in the training set.

15 We then ran Space-time smoothing and Gaussian process regression with the training data set using  
16 each set of parameters being tested to generate estimates for each location and every year in both the  
17 training and testing data set.

18 Within a given iteration we calculate the absolute relative error of the GPR estimate compared to each  
19 empirical estimate in the testing set. We also classify each empirical estimate in the testing set as  
20 covered or not covered. The determination of coverage is made by calculating total variance—the sum  
21 of the data variance and the variance of the GPR estimate—and then calculating a 95% uncertainty  
22 interval around the GPR estimate based on this total variance and assuming a normal distribution. If the  
23 empirical estimate is within this uncertainty interval, it is classified as covered, and otherwise not. For  
24 each combination of parameters, we calculate the mean absolute relative error and the mean coverage  
25 across all iterations from all countries within a particular group. The loss function described below is  
26 then calculated for each parameter combination, and the parameter combination with the lowest loss is  
27 selected for each group;

28 
$$\text{loss} = (0.95 - \text{coverage})/5 + (\text{absolute relative error})$$

29 Countries with at least 20 years of VR data were assigned their own parameters. Other locations were  
30 grouped based on how much and what type of data they had available. A set of parameters was then  
31 applied to all locations in that group. A summary of these groups is in the following table:

32

33

1 **Table. Parameter Groups**

| Group                              | Conditions                                                                               |
|------------------------------------|------------------------------------------------------------------------------------------|
| Sparse data, with complete VR only | Only complete VR, more than 10 years of VR, with VR after 1970                           |
| Sparse data, VR only               | At least some incomplete VR, more than 10 years VR, with VR after 1970                   |
| Sparse data, VR +                  | At least some incomplete VR, with either fewer than 10 years of VR or all VR before 1970 |
| Sparse data, other                 | No VR or sibling data                                                                    |
| Sibling data, small                | No VR, less than 21 years of sibling data                                                |
| Sibling data, large                | No VR, more than 21 years of sibling data                                                |
| No data                            | No data                                                                                  |

2

3 For countries with no data, the highest of all selected scales and squared amplitudes from among all  
4 other countries was used.

5 In some cases, we restricted the universe of possible parameters. Most of these restrictions occurred for  
6 the  $\lambda$  parameter. For many locations with complete VR, we knew that higher lambda values would result  
7 in a larger confidence interval than would be appropriate. We also included a lower limit of  $\lambda$  for some  
8 locations with either incomplete VR or no VR, so that confidence intervals would reflect the uncertainty  
9 of these data. For example, in locations where we only had sibling history data, we restricted lambda to  
10 being greater than 0.5. We also made some other manual exceptions to  $\lambda$ ,  $\zeta$ , and scale where results did  
11 not pass the common sense test.

12 We set the differentiability to 0.8 in countries with only complete VR data, excepting those in the  
13 Caribbean, Oceania, and the country of Mauritius, and to 2.0 in other all other locations. We used a  
14 lower differentiability in countries with complete VR data because in these countries we want the final  
15 estimates to follow the data closely even if the trend described is not smooth. In contrast, in countries  
16 where the data are less reliable we don't want the final estimates to be overly influenced by individual  
17 data points.

18 [Accounting for the uncertainty in HIV covariate in the first stage model for high HIV/AIDS burden](#)  
19 [locations](#)

20 To account for the uncertainty in estimated crude death rate due to HIV, a key covariate for the first  
21 stage model described in section 2.6, we generated draw level crude death rate due to HIV and  
22 repeated the first stage model and ST-GPR processes described in section 2.4.5 250 times using 250  
23 unique draw level crude death rate due to HIV derived from our EPP-Spectrum process. We repeated  
24 this process 250 times to balance between computation intensity and obtained increases in the  
25 estimated uncertainty interval for 45q15. For each one of the 250 ST-GPR runs, four draws were  
26 selected out of 1,000 to form the final 1,000 draws of 45q15 for each location over time.

1 [Section 2.4.6. Identify and remove outliers](#)

2 To arrive at sensible level and trends in adult mortality rate, certain outliers were excluded from our ST-  
3 GPR regression process. In general, we used the following process to outlier influential raw data points  
4 that otherwise lead to erroneous without fatal discontinuity 45q15 estimates:

- 5 1. Raw input 45q15 data points from years affected by war, natural disasters, and other fatal  
6 discontinuities as defined in GBD 2016 are excluded from the analysis described in section 2.4.
- 7 2. Examination of survey/registration data quality leads certain raw data to be outliered. Such  
8 examples include the Afghanistan 2010 Mortality Survey that was not nationally representative,  
9 and some of the VR data from Serbia that didn't include deaths from Kosovo.
- 10 3. Visual inspection of raw input data on 45q15 and estimated time series estimates of 45q15 from  
11 ST-GPR by GBD researchers and country experts through the GBD collaborator network. Data  
12 points are outliered when it is unexplainably different from other adjacent points from the  
13 similar source indicating a data reporting issue and compilation error in the direct sources  
14 where such data was obtained. Some subnational level single year 45q15 estimates from sibling  
15 survival methods are excluded for unreasonably high or low estimates due to small sample sizes.

16 [Section 2.4.7. Rake subnational estimates to national level \(excluding South Africa\)](#)

17 First, we randomize the order of the 1,000 subnational-level draws and the national draws separately to  
18 avoid any correlation between subnational and national draws that may have been introduced in prior  
19 processes.

20 GBD 2016 provides estimates of 45q15 for 754 locations at both subnational and national level. While it  
21 is absolutely essential to use input data from the subnational level in informing the level and trend of  
22 45q15 for the corresponding location, it is often the case that we tend to have more robust data at the  
23 national level, more data sources and data sources that cover longer time periods. To have consistent  
24 estimates between aggregated subnational level estimates and the separately estimated national level  
25 estimates, we rake the subnational 45q15 to match our national level 45q15 estimate by using the  
26 following formulas:

27 
$${}_{45}q_{15}^{s'} = 1 - e^{-45 \cdot {}_{45}M_{15}^s \cdot r}$$

28 and

29 
$$r = \frac{\ln(1 - {}_{45}q_{15}^N) / -45}{\sum_{s=1}^n \ln(1 - {}_{45}q_{15}^s) \cdot \frac{P_s}{P_N} / (-45)}$$

30 In the above equations, s refers to subnational locations within a country N, p is population in age group  
31 15 to 59, and 45q15 are estimates of adult mortality rate from the ST-GPR process, and  ${}_{45}q_{15}^{s'}$  is the post-  
32 raking 45q15 for subnational locations.

33 [Section 2.4.8. Review estimates for quality](#)

34 The preliminary estimates of adult mortality rates are reviewed by both the researchers who work on  
35 the demographic estimation process and the GBD all-cause mortality collaborator network. Concerns

1 regarding quality of certain survey and data points are raised and reviewed which lead to revision of the  
2 database where applicable.

### 3 [Section 2.4.9. 45q15 estimates with HIV](#)

4 The results of the adult mortality rate ST-GPR process are estimates of probability of death from all  
5 causes of death except fatal discontinuities for all locations covered in GBD 2016 for 1970 to 2015.

### 6 [Section 2.4.10. HIV-free 45q15](#)

7 As a result of the non-linear mixed effects model used in the first stage before ST-GPR, we also generate  
8 HIV-free counterfactual 45q15 by removing the impact of HIV, as specifically measured by crude death  
9 rate due to HIV/AIDS estimated in the EPP-Spectrum process, from all-cause 45q15 without fatal  
10 discontinuity.

## 11 [Section 2.5. Model life table system](#)

### 12 [Section 2.5.1. Overview](#)

13 For many purposes, estimates of age-specific mortality rates are useful. In settings without complete VR  
14 systems, data are often available for some summary measures of mortality such as under-5 mortality  
15 rate (henceforth 5q0) from complete or summary birth histories and mortality from ages 15 to 60 from  
16 sibling histories (45q15, and commonly described as adult mortality rate). Model life tables, which are  
17 structured relationships between levels of age-specific mortality at different ages, can be used to  
18 generate an estimate of age-specific mortality for detailed age-groups from summary measures of  
19 mortality on children and adults (5q0 and 45q15, respectively). Model life tables have many other  
20 applications as well, such as simplifying the task of mortality projection or updating life tables from the  
21 most recent empirically observed data. This is true even for countries with good VR systems due to the  
22 fact that compilation and publication of VR data may take years.

23 An ideal model life table system has several desirable attributes. First, a model life table system should  
24 be parsimonious and require only a few entry parameters to generate a full life table with age specific  
25 mortality rates. Second, it should adequately capture the range of age patterns of mortality observed in  
26 real populations and yield high predictive validity, not just measured by summary indices such as life  
27 expectancy at birth, but more importantly by age-specific mortality rates. Third, it should provide  
28 satisfactory estimates of age-specific mortality for countries with high levels of mortality, especially  
29 those with substantial HIV/AIDS epidemics. Finally, a model life table should generate age-specific  
30 mortality with a plausible time trend, and the partial derivative of age-specific mortality should be  
31 positive with respect to entry parameters such as 5q0 and 45q15.

32 A simple and somewhat flexible model life table system was proposed by Brass.<sup>16</sup> He observed that in  
33 general the logit of the  $l_x$  (proportion of a hypothetical birth cohort still alive at age  $x$ ) column in a life  
34 table could be represented as a linear transformation of the logit of the  $l_x$  column of a reference  
35 standard life table. Murray et al. noted that as a population moved further away from the levels of  
36 mortality in the reference standard, the assumption of linearity in logit  $l_x$  space was violated.<sup>26</sup> A series  
37 of age-specific modification factors were proposed that allowed for the characteristic bending of the  
38 logit  $l_x$  function compared to the standard. Murray et al. also assessed the ability of this modified logit  
39 life table system to predict age-specific mortality rates. The modified logit life table system with its built-

1 in optional mechanism of predicting adult mortality (45q15) from child mortality (5q0) has been  
2 extensively used by the World Health Organization since the early 2000s.

3 This system, however, suffers from two major limitations. First, when adult mortality is very high relative  
4 to child mortality, such as in the presence of an HIV/AIDS epidemic, the age patterns of mortality  
5 generated do not fit well to the observed data. Second, when the modified logit life table system is  
6 applied to time series of 5q0 and 45q15, paradoxical trends can be generated where adult and child  
7 mortality are declining, but predicted age-specific death rates in some age groups are increasing. We  
8 have extended the modified logit life table system to deal with these two major limitations. Wang et al.  
9 provide a more complete discussion of the development of this approach.<sup>2,4</sup> We summarize these  
10 developments in brief here. There are four distinct steps.

### 11 [Section 2.5.2. Building empirical model life table database: data sources and quality review](#)

12 Relational model life table systems critically depend on the empirical database used to generate model  
13 life table standards and test the predictive validity of model life tables. For both all-cause mortality and  
14 cause-specific mortality analyses in GBD, we have amassed a comprehensive database on human  
15 mortality from censuses, VR systems, sample VR systems such as the SRS from India, the Disease  
16 Surveillance Point system from China, and the Human Mortality Database. These aforementioned data  
17 sources provide a total of 52,149 empirical life tables. After removing duplicated empirical life tables  
18 between Human Mortality Database and VR sources, we have closely examined every single empirical  
19 life table by applying the following quality control process to further remove life tables with  
20 irregular/impossible age pattern of mortality:

- 21
- 22 a. Empirical life tables with irregular age pattern of mortality such as probability of death in age  
23 group 1-4 higher than first year of year are dropped;
  - 24 b. Empirical life tables where age pattern of mortality doesn't conform to Gompertz law of  
25 mortality between age 40 and 80 are dropped.

26 Murray et al. used a database of 3,566 life tables covering 63 countries.<sup>26</sup> We have expanded this  
27 database to include 15,221 empirical life tables. Two major data sources provide about 97.0% of these  
28 life tables. A total of 4,130 life tables from the Human Mortality Database (HMD)<sup>27</sup> dating between 1950  
29 and 2015 are included in our database. We excluded life tables of poor quality and those from years  
30 affected by wars and pandemic. The other major source of empirical life tables is the collection in which  
31 VR data have been evaluated using death distribution methods, as revised by Murray and colleagues  
32 (2010) and Wang et al.<sup>4,19</sup>

33 It is our view that accuracy of the age pattern of mortality in the raw data is to a certain degree  
34 correlated with the completeness of the data. We did make certain exceptions for the purpose of  
35 including age pattern of mortality from regions that otherwise won't be represented in our database  
36 with the strict completeness threshold. In all cases, rigorous assessment of the quality of these data is  
37 conducted. In total, we included over 10,000 life tables from various VR sources including subnational  
38 VR from Mexico, Brazil, and United States, Disease Surveillance Point system, and sample registration  
39 system that are adjusted by GBD's completeness assessment process as detailed in section 2.1. In  
40 addition, in order to provide better fit to places with high quality VR data but age pattern of mortality



1 has suffered from the small number issues, we have included additional empirical life tables that are  
2 only used in estimating age pattern of mortality for the geographies the life tables are from. This adds  
3 another 16953 empirical life tables mostly for subnational locations with small population size.

4 In building the empirical life table database for the model life table system used by GBD, we examined  
5 additional data sources that we decided to exclude from our database. These included VR sources  
6 deemed incomplete and life tables with implausible patterns or high levels of stochastic fluctuation  
7 among age groups.

8 In addition, all life tables in our database with crude death rate due to HIV/AIDS in adult age groups over  
9 0.1% are excluded in the process described in section 2.5.1.

### 10 [Section 2.5.3. Extending age-specific mortality to age 100+](#)

11 To extrapolate age-specific mortality beyond age 85, the Gompertz law of mortality and other functional  
12 model age pattern of mortality methods are generally used.<sup>8,28</sup> Here, we have developed a new model  
13 with better predictive validity than existing methods. Age-group dummies and probability of dying from  
14 age 80 to 84 in logarithmic scales are used to estimate the difference in age-specific probability of dying  
15 in logit scale between two consecutive age-groups, as described in the following equation:

$$\text{logit}\left({}_5q_x^{j,t,g}\right) - \text{logit}\left({}_5q_{x+5}^{j,t,g}\right) = \alpha^g + \beta_x^g \cdot \text{age} + \gamma^g \cdot \text{logit}\left({}_5q_{80}^{j,t,g}\right) + \eta_j^g + \xi_x^{j,t,g}$$

16 Here,  $j$  refers to country,  $g$  refers to sex, and  $t$  refers to time. Parameters are estimated using data from  
17 selected countries in Human Mortality Database with high quality VR data in the oldest old age groups  
18 above age 80.<sup>27</sup> The parameters estimated from the above model are then used to generate age-specific  
19 probability of death from age 85 to 109.

### 20 [Section 2.5.4. GBD relational model life table system with a flexible standard selection mechanism](#)

21 The relational model life table system is based on the logic that in order to capture the very high levels  
22 of younger adult mortality seen in populations with high HIV prevalence, we needed to develop a model  
23 life table for a counterfactual population without HIV and then add on the effects of HIV by age and sex.  
24 This system is captured in three components. We first estimated counterfactual levels of  $5q_0$  and  $45q_{15}$   
25 in the absence of HIV. The empirical approach taken for this step is explained below. Then a full set of  
26 age-specific death rates were generated using the model life table system from the counterfactual levels  
27 of child and adult mortality. Finally, the increase in mortality, specific to each age group, associated with  
28 HIV was estimated.

### 29 [Model for populations free of HIV/AIDS](#)

30 In terms of estimating a set of age-specific death rates from  $5q_0$  and  $45q_{15}$  using a relational model life  
31 table, we have undertaken several innovations. A key change from previous relational model life table  
32 systems is the shift to modeling  $q_x$  in logit space rather than the  $l_x$  in the same space. Modeling  $q_x$   
33 enables us to more precisely capture the different impacts of changes from the two entry parameters  
34 ( $5q_0$  and  $45q_{15}$ ) on different age-groups. The following equation provides the life table for populations  
35 not affected by HIV/AIDS.

$$\begin{aligned} \text{logit}({}_nq_x^c) &= \text{logit}({}_nq_x^s) + \beta_x^1 \cdot (\text{logit}({}_5q_0^c) - \text{logit}({}_5q_0^s)) \\ &+ \beta_x^2 \cdot (\text{logit}({}_{45}q_{15}^c) - \text{logit}({}_{45}q_{15}^s)) + \xi_x \end{aligned}$$

1 Where  $\text{logit}({}_{45}q_{15}^s)$  is the logit transformation of the 45q15 in the standard life table (development of  
 2 the standard life table is presented below);  $\text{logit}({}_{45}q_{15}^c)$  is the logit transformation of the 45q15 value  
 3 for a country without HIV or the counterfactual level of 45q15 in the absence of HIV in a country  
 4 affected by HIV/AIDS;  $\text{logit}({}_5q_0^s)$  is the logit transformation of the 5q0 in the standard population;  
 5  $\text{logit}({}_5q_0^c)$  is the logit transformation of 5q0 for a country without HIV or the counterfactual level of 5q0  
 6 in the absence of HIV in a country affected by HIV/AIDS;  $\text{logit}({}_nq_x^s)$  is the logit of the probability of  
 7 death in the standard population from age x to x + n;  $\text{logit}({}_nq_x^c)$  is the logit transformation of the  
 8 probability of death from age x to x + n in a country without HIV or the counterfactual level of  ${}_nq_x$  in the  
 9 absence of HIV in a country affected by HIV/AIDS; and  $\beta_x^1$  and  $\beta_x^2$  are coefficients that vary by age x and  
 10 which measure the impact of differences in child and adult mortality rates between a target life table  
 11 and the standard life table on the estimated age pattern of mortality. In other words, both coefficients  
 12 determine how much the estimated age pattern of mortality deviates from the standard by age and  
 13 from linearity.

14 This equation proposes that the logit transformed age specific probability of dying in a target life table  
 15 (c) can be represented as a function of the corresponding logit transformed age specific probability of  
 16 dying in a standard life table (s) and the differences in probability of dying from age 0 to 5 in logit scale  
 17 and the difference in probability of dying from age 15 to 60 in logit scale between a pairs of life tables: c  
 18 and s. Life table c is the estimated HIV-free life table either for a country affected by the epidemic or  
 19 not. The model is based on an empirical observation where the differences in age specific probabilities  
 20 of dying in logit scale between two life tables are highly correlated with differences in 5q0 or 45q15 in  
 21 logit scale when HIV/AIDS epidemic is not present.

22 Coefficients  $\beta_x^1$  and  $\beta_x^2$  are estimated using the following equation:

$$23 \quad \text{logit } {}_nq_x^c - \text{logit } {}_nq_x^s = \beta_x^1 * (\text{logit } {}_5q_0^c - \text{logit } {}_5q_0^s) + \beta_x^2 * (\text{logit } {}_{45}q_{15}^c - \text{logit } {}_{45}q_{15}^s) + \xi_x$$

24 In estimating the parameters, we use country-time specific and region (i.e. global burden of disease  
 25 region) specific standard for each life table not affected by HIV/AIDS in our database (other aggregated  
 26 standard life tables by different geographical or epidemiological clustering criteria are also possible).  
 27 Country-time specific standard life tables are used whenever an empirical life table from the same  
 28 country within a 15-year time frame is available in our database. Region specific standard life tables are  
 29 generated by collapsing all zero-HIV life tables in our database from the same global burden of disease  
 30 region by sex. We then pair up all zero-HIV life tables in our database with the generated region specific  
 31 life tables.

32 The estimated  $\hat{\beta}_x^1$  and  $\hat{\beta}_x^2$  are shown in the table below. We limit the effects of 5q0 and 45q15 to  
 33 certain age groups to avoid implausible outputs when 5q0 and 45q15 from a population change in  
 34 opposite directions. With the results in the table below, we can generate full life tables for populations

1 not affected by HIV/AIDS. The values of 5q0 and 45q15 serve as points of entry (or entry parameters) for  
 2 this model life table system.

3 **Table: Model life table coefficients**

| Age   | Diff. in ${}_5q_0$ (logit scale) |        | Diff. in ${}_{45}q_{15}$ (logit scale) |        |
|-------|----------------------------------|--------|----------------------------------------|--------|
|       | Male                             | Female | Male                                   | Female |
| 0     | 0.993                            | 0.982  | --                                     | --     |
| 1-4   | 1.005                            | 1.047  | --                                     | --     |
| 5-9   | 0.823                            | 0.766  | --                                     | --     |
| 10-14 | 0.468                            | 0.368  | 0.386                                  | 0.507  |
| 15-19 | 0.134                            | 0.147  | 0.823                                  | 0.776  |
| 20-24 | 0.042                            | 0.136  | 0.828                                  | 0.865  |
| 25-29 | 0.029                            | 0.121  | 0.775                                  | 0.925  |
| 30-34 | 0.018                            | 0.094  | 0.784                                  | 0.935  |
| 35-39 | --                               | --     | 0.871                                  | 1.064  |
| 40-44 | --                               | --     | 0.906                                  | 0.990  |
| 45-49 | --                               | --     | 0.924                                  | 0.921  |
| 50-54 | --                               | --     | 0.903                                  | 0.878  |
| 55-59 | --                               | --     | 0.855                                  | 0.860  |
| 60-64 | --                               | --     | 0.792                                  | 0.838  |
| 65-69 | --                               | --     | 0.786                                  | 0.866  |
| 70-74 | --                               | --     | 0.801                                  | 0.911  |
| 75-79 | --                               | --     | 0.799                                  | 0.914  |
| 80-84 | --                               | --     | 0.709                                  | 0.832  |

4

5 Our procedure of standard life table computation takes into account empirical relationships between  
 6 differences in age pattern of mortality, geography, and time. To generate a standard, we first calculated  
 7 the Mahalanobis distance between the target life table and all zero-HIV empirical life tables of the same  
 8 sex in our database based on 5q0 and 45q15 (in logit scale). The Mahalanobis distance between two sets  
 9 of 5q0 and 45q15 are defined as:

10 
$$D_M^i(Q^i) = \sqrt{(Q^i - O)^T S^{-1} (Q^i - O)}$$

11 Where  $O$  is a multivariate vector representing entry parameters 5q0 and 45q15 in logit scale.  $Q^i =$   
 12  $(\text{logit}({}_5q_0^i), \text{logit}({}_{45}q_{15}^i))$  is a multivariate vector that corresponds to an empirical life table  $i$  in our life  
 13 table database. We chose Mahalanobis distance over Euclidean distance due to the fact that 5q0 and  
 14 45q15 are highly correlated in logit space (the correlation coefficients are 0.58 and 0.87 for males and  
 15 females, respectively), and Mahalanobis distance takes the covariance matrix of 5q0 and 45q15 in logit  
 16 scale into consideration when calculating the distance between any pair of life tables. We then keep the  
 17 potentially most similar life tables as measured by the Mahalanobis distance. The number of life tables  
 18 retained is based on the numbers of empirical life tables from the same country included in our

1 database. For example, for developed countries with empirical life tables for every year, only the 10  
2 most similar life tables and all life tables from the same country are kept for additional analysis.

3 In the second step, instead of obtaining a simple arithmetic mean of all selected life tables, we applied  
4 empirical weights to each selected life table and computed the weighted average. We examined all  
5 possible pairs of life tables of the same sex in our empirical database by country, GBD region, and GBD  
6 super-region. For each pair of life tables, we computed the sum of difference in  $nq_x$  in logit space. We  
7 then obtained the mean of such values by sex, time difference in years of observation, and whether the  
8 pair of life tables are from the same country, same GBD region, or same GBD super-region. The  
9 reciprocals of the squared means were used as empirical weights. The figure below shows the empirical  
10 weights by lag in time and geographic region for males. This process gives more weight to life tables  
11 closer in terms of time and geographic location.

12 **Figure. Empirical weights by lag in time and geographic region for males.**

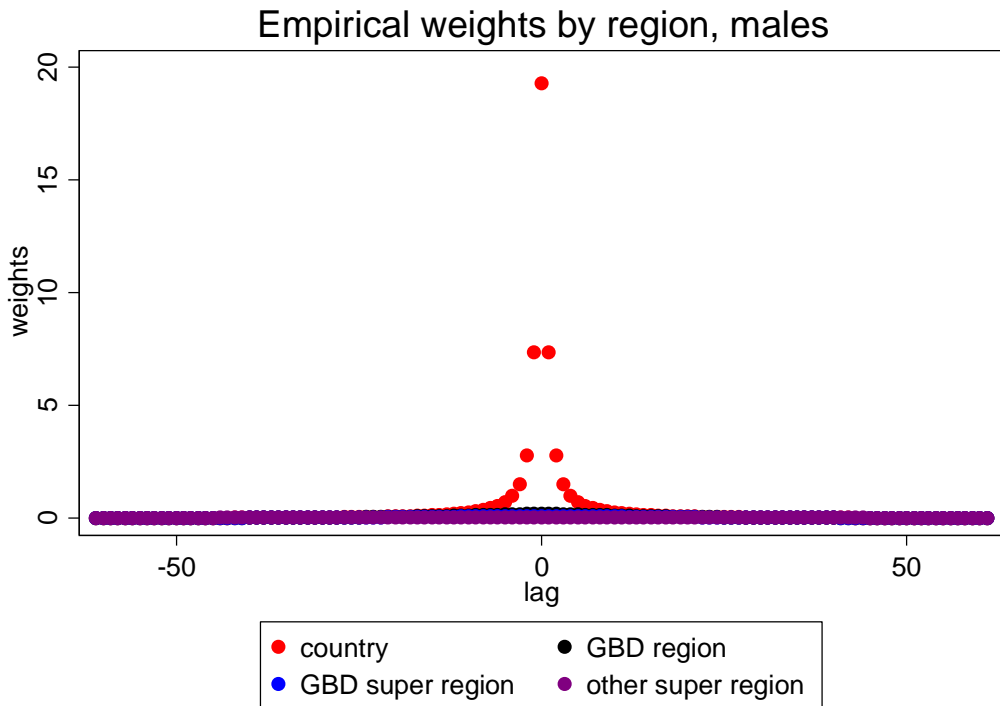

13

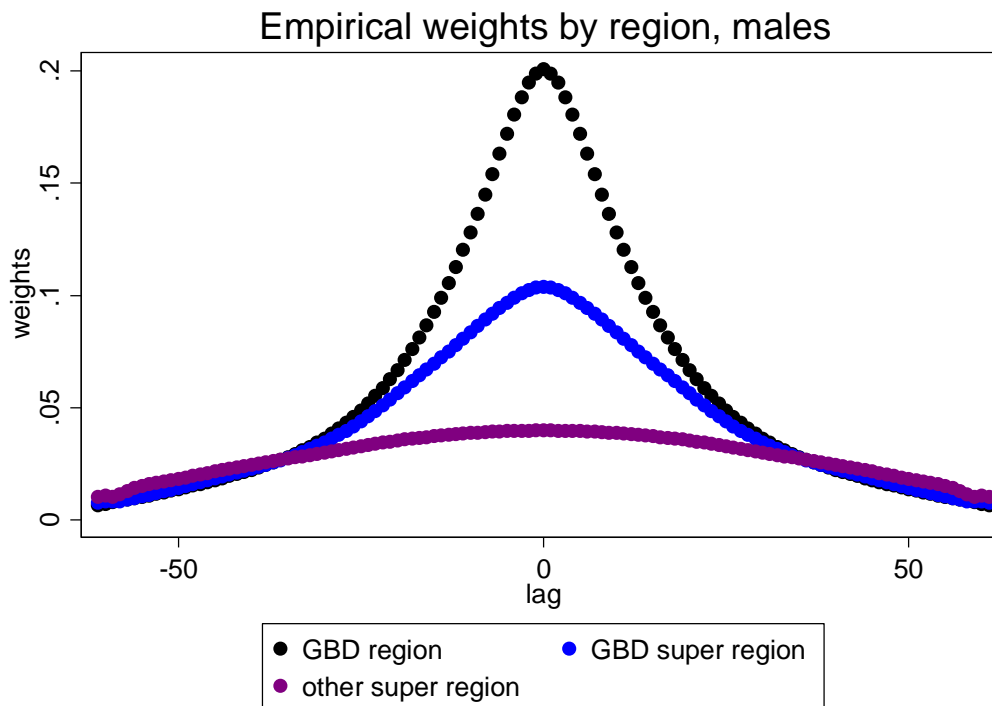

1  
 2 The counterfactual life table,  $c$ , or the final life table,  $p$ , when HIV/AIDS is non-existent in the population,  
 3 is estimated using a standard life table,  $s$ , which is generated using the aforementioned procedure and  
 4 coefficients  $\hat{\beta}_x^{1,g}$  and  $\hat{\beta}_x^{2,g}$  as shown in the model life table coefficients table.

5 **Introducing AIDS**

6 Currently, perhaps the most challenging issue for all existing model life table systems is providing  
 7 plausible age specific mortality estimates given an HIV/AIDS epidemic. Both widely used model life table  
 8 systems, the Coale-Demeny model life tables and the Modified Logit Life Table system, are largely based  
 9 on empirical life tables from the pre-HIV era. In addition, they do not provide an integrated solution to  
 10 the problem of incorporating HIV/AIDS.

11 In GBD 2016, we apply a two-step process where we first estimate HIV/AIDS counterfactual age pattern  
 12 of mortality first using the method described in section 2.6 with HIV counterfactual 5q0 and 45q15 as  
 13 entry parameters, and then in the second step add excess mortality due to HIV/AIDS in summary age  
 14 group of under-5 and age 15 to 59 to HIV-free age specific mortality estimated from step 1. HIV  
 15 counterfactual 5q0 and 45q15 are estimated using the first stages models employed in the Gaussian  
 16 Process Regressions for 5q0 and 45q15 discussed in sections 2.2 and 2.4.

17 For GBD 2016, we apply an innovative way of adding excess mortality due to HIV to specific age groups  
 18 by location estimated in the Spectrum model. In this step, we extract number of deaths due to HIV/AIDS  
 19 in the spectrum model and constructed relative risk that is defined as the ratio HIV specific mortality in a  
 20 specific age group and age group 40-44.

1  
2  
3  
4  
5  
6  
7  
8  
9  
10  
11  
12  
13  
14  
15  
16  
17  
18  
19  
20  
21  
22  
23  
24  
25  
26  
27  
28  
29  
30  
31  
32  
33  
34  
35  
36

$$R_i = nM_x^{HIV} / {}_5M_{40}^{HIV}$$

Where  $i$  indicates different age groups 0, 1-4, 4-9, 10-14, etc.

Since EPP/Spectrum is run at the draw level, we have 1000 draw of relative risks of dying from HIV/AIDS by location, sex and time. This is different from the relative risks used in previous iterations of GBD that were estimated using available VR data and by types of epidemic.

### Estimating all-cause mortality for South Africa

For all locations except South Africa, the estimation of all-cause mortality follow the two step process where we generate HIV-free age pattern of mortality first, then we add on the excess mortality due to HIV/AIDS as described in the previous sections. However, since South Africa has a near complete vital registration system, we want to utilize the age pattern of all-cause mortality observed in the vital registration system to inform our all-cause mortality process. For this purpose, we used observed VR from South Africa and applied the two step model life table process as used for all other populations in reverse order. We first estimate with HIV mortality using observed VR with HIV included to generate the standard life table. Then excessive mortality due to HIV is removed from the estimated with HIV mortality using the relative risk of dying from HIV estimated in the Spectrum model.

The advantage of this process is that we are able to match the completeness adjusted vital registration data by age and the age pattern of HIV specific mortality matches what is estimated in the epidemiological model of EPP/Spectrum.

### Uncertainty in the estimated life tables

One important attribute of this study is the inclusion of uncertainty in every single step of the GBD mortality estimation process. We have integrated uncertainty from the entry parameters (5q0 and 45q15) and the coefficients of each model discussed in this section based on the method illustrated by King et al.<sup>29</sup> Essentially, the model life table process described above is repeated 1,000 times based on randomly paired entry parameters (thus different standard life tables) and model coefficients. As a result of this process, in countries where uncertainties in estimated entry parameters are high, we can have wide uncertainty intervals in the estimated deaths, which is the final product of the GBD mortality process.

### Section 2.5.5. Rake subnational life tables to national level (excluding South Africa)

Since data are scarcer for subnational units than it is at the national level in most countries, estimates of subnational mortality require adjustment to be consistent with national estimates. To generate consistent time series estimates of all-cause mortality including mortality rates and death numbers, we raked subnational-level estimates to separately-estimated national level estimates. For the mortality envelope, we applied a national scalar such that the sum of the subnational location mortality envelopes matched the mortality envelope separately estimated for the national level.

1 The only exception to this subnational-to-national raking process is South Africa, where we aggregate  
2 subnational level estimates as our national level estimates. Based on our observation in previous  
3 iterations of GBD, the high level of heterogeneity in the HIV/AIDS epidemic at the subnational level in  
4 South Africa introduced a challenge to accurate estimation of both all-cause and HIV cause-specific  
5 mortality in South Africa at the national level. Since our EPP-Spectrum model generated estimates at the  
6 province level for South Africa, we produced province-level all-cause mortality estimates using all  
7 available subnational sources of child and adult mortality rates and aggregated province-level results as  
8 our final national-level estimates for South Africa. The number of data sources were found to be  
9 comparable at the national and provincial levels.

10

## 11 [Section 2.6. HIV/AIDS estimation](#)

### 12 [Section 2.6.1. Age-specific mortality \(with and without HIV\)](#)

13 The with-HIV and without-HIV age-specific mortality rates that are inputs to the HIV/AIDS estimation are  
14 part of the model life table process described in section 2.5.

### 15 [Section 2.6.3. HIV-free mortality rate](#)

16 The age-specific mean HIV-free mortality rates produced by the model life table process are used as  
17 inputs to the estimation of survival on and off ART, a portion of the modeling of HIV/AIDS mortality.

### 18 [Section 2.6.4. HIV-free survival rates \(for Spectrum\)](#)

19 The age-specific HIV-free survival probabilities from the model life table process were used to create  
20 inputs for Spectrum. However, because the model life table process produces 5-year age group  
21 estimates and Spectrum models in single-year age bins, we interpolated 5-year age group survival into  
22 single-year age group survival. Life tables generally include a variable called  $l_x$ , which represents a  
23 synthetic cohort, aged through the mortality observed in the table. At age 0, 100,000 people may be  
24 alive, and at each age group, the probability of survival is applied to the number who survive the  
25 previous age group. In order to interpolate single-year survival, we fit a spline to the 5-year  $l_x$  values to  
26 interpolate single-year  $l_x$  values. Then, we back-calculated the single-year probabilities of survival. This  
27 method was considered better than assuming constant probability of survival for each year in a 5-year  
28 age group and generated smoother single-year estimates. These single-year probabilities of HIV-free  
29 survival were then used as inputs to Spectrum.

### 30 [Section 2.6.5. EPP and Spectrum](#)

31 For the GBD analysis of HIV, we used variants of two tools developed by UNAIDS: a) the estimates and  
32 projections package (EPP) which is meant to generate a time series estimate of HIV incidence consistent  
33 with observed prevalence data in ages 15-49 and b) the Spectrum natural history model that uses an  
34 estimated time series of HIV incidence, demographic inputs including HIV-free mortality and population,  
35 assumptions about CD4 progression rates, and assumptions about on- and off-ART HIV death rates by  
36 age, sex, and CD4 rate to predict incidence, prevalence, and death by age, sex, and year. We modified  
37 both tools for use in the GBD.

38

1 **Section 2.6.6. HIV/Mortality Reckoning**

2 The Reckoning process is intended as a method of reconciling separate estimates of HIV mortality (and  
 3 its resulting effect on estimates of HIV-free and all-cause mortality) due to two separate estimation  
 4 processes within the GBD all-cause and HIV estimation framework: those from the model life table  
 5 system as a way to capture the impact of HIV on age pattern of all-cause mortality, and the those from  
 6 the natural history model of EPP-Spectrum as used by GBD and UNAIDS. In addition, we also utilize  
 7 space-time GPR smoothed VR data on HIV-specific mortality for countries with good quality VR instead  
 8 of using mortality estimates from Spectrum based on back-calculated incidence using case report data.

9 As part of the HIV/AIDS estimation process, all GBD 2016 locations were assigned to a modeling strategy  
 10 group, depending on the level of HIV within the country and the availability and quality of HIV and VR  
 11 data. Groups were used to determine which sources to use for HIV-specific mortality data and how to  
 12 calculate final estimates of HIV and all-cause mortality.

13 **Table: Locations by HIV estimation group**

| Group 1             | Group 2A            | Group 2B               | Group 2C                          |
|---------------------|---------------------|------------------------|-----------------------------------|
| Angola              | Antigua and Barbuda | Albania                | Afghanistan                       |
| Benin               | Argentina           | Algeria                | American Samoa                    |
| Botswana            | Armenia             | Azerbaijan             | Andorra                           |
| Burkina Faso        | Australia           | Bahrain                | Bangladesh                        |
| Burundi             | Austria             | Bosnia and Herzegovina | Bolivia                           |
| Cambodia            | The Bahamas         | Brunei                 | Bhutan                            |
| Cameroon            | Barbados            | China                  | Comoros                           |
| Cape Verde          | Belarus             | Cyprus                 | Federated States of<br>Micronesia |
| Central African Rep | Belgium             | Egypt                  | Guam                              |
| Chad                | Belize              | El Salvador            | Iraq                              |
| Cote D'Ivoire       | Bermuda             | Fiji                   | Laos                              |
| DR Congo            | Brazil              | FYR Macedonia          | Lebanon                           |
| Djibouti            | Bulgaria            | Greenland              | Libya                             |
| Dominican Republic  | Canada              | Honduras               | Marshall Islands                  |
| Equatorial Guinea   | Chile               | Indonesia              | Mauritania                        |
| Eritrea             | Colombia            | Iran                   | Mongolia                          |
| Ethiopia            | Costa Rica          | Jamaica                | Morocco                           |
| Gabon               | Croatia             | Jordan                 | Nepal                             |
| Gambia              | Cuba                | Kiribati               | North Korea                       |
| Ghana               | Czech Republic      | Malaysia               | Northern Mariana<br>Islands       |
| Guinea              | Denmark             | Maldives               | Pakistan                          |
| Guinea-Bissau       | Dominica            | Montenegro             | Samoa                             |



| <b>Group 1</b>   | <b>Group 2A</b> | <b>Group 2B</b>            | <b>Group 2C</b>       |
|------------------|-----------------|----------------------------|-----------------------|
| Haiti            | Ecuador         | Myanmar                    | Sao Tome and Principe |
| Kenya            | Estonia         | Nicaragua                  | Saudi Arabia          |
| Lesotho          | Finland         | Oman                       | Solomon Islands       |
| Liberia          | France          | Palestine                  | Timor-Leste           |
| Madagascar       | Georgia         | Paraguay                   | Tonga                 |
| Malawi           | Germany         | Peru                       | United Arab Emirates  |
| Mali             | Greece          | Qatar                      | U.S. Virgin Islands   |
| Mozambique       | Grenada         | Serbia                     | Vanuatu               |
| Myanmar          | Guatemala       | Seychelles                 | Vietnam               |
| Namibia          | Guyana          | Slovakia                   | Yemen                 |
| Niger            | Hungary         | South Korea                |                       |
| Nigeria          | Iceland         | Sri Lanka                  |                       |
| Papua New Guinea | Ireland         | Suriname                   |                       |
| Rep of the Congo | Israel          | Syria                      |                       |
| Rwanda           | Italy           | Taiwan (Province of China) |                       |
| Senegal          | Japan           | Tajikistan                 |                       |
| Sierra Leone     | Kazakhstan      | Thailand                   |                       |
| South Africa     | Kyrgyzstan      | Tunisia                    |                       |
| South Sudan      | Kuwait          | Turkey                     |                       |
| Swaziland        | Latvia          | Vietnam                    |                       |
| Tanzania         | Lithuania       |                            |                       |
| Togo             | Luxembourg      |                            |                       |
| Uganda           | Macao           |                            |                       |
| Zambia           | Malta           |                            |                       |
| Zimbabwe         | Mauritius       |                            |                       |
| India (1B)       | Mexico          |                            |                       |
| Sudan (1B)       | Moldova         |                            |                       |
| Somalia (1B)     | Netherlands     |                            |                       |
|                  | Norway          |                            |                       |
|                  | New Zealand     |                            |                       |
|                  | Panama          |                            |                       |
|                  | Philippines     |                            |                       |
|                  | Poland          |                            |                       |
|                  | Puerto Rico     |                            |                       |
|                  | Portugal        |                            |                       |
|                  | Romania         |                            |                       |
|                  | Russia          |                            |                       |
|                  | Saint Lucia     |                            |                       |

| Group 1 | Group 2A                         | Group 2B | Group 2C |
|---------|----------------------------------|----------|----------|
|         | Saint Vincent and the Grenadines |          |          |
|         | Singapore                        |          |          |
|         | Slovenia                         |          |          |
|         | Spain                            |          |          |
|         | Sweden                           |          |          |
|         | Switzerland                      |          |          |
|         | Trinidad and Tobago              |          |          |
|         | Turkmenistan                     |          |          |
|         | Ukraine                          |          |          |
|         | United Kingdom                   |          |          |
|         | United States of America         |          |          |
|         | Uruguay                          |          |          |
|         | Uzbekistan                       |          |          |
|         | Venezuela                        |          |          |

1

2 Group 1 includes countries with greater than .25% adult prevalence of HIV and available HIV prevalence  
3 survey data and/or antenatal care (ANC) clinic data. We ran the EPP model using these available input  
4 data for all locations in Group 1. Demographic assessments for these locations depend substantially on  
5 sibling history data analysis, which have large uncertainty intervals and for which there may be local  
6 variation in biases in sibling history responses. India, Sudan, and Somalia were classified as Group 1B,  
7 since they had available ANC data but adult HIV prevalence less than .5%. In these locations, all-cause  
8 mortality estimates were taken from the model life table system while HIV-specific deaths were  
9 estimated using EPP-Spectrum.

10 Group 2A locations were classified as high quality (4 or 5 star) VR systems using the GBD VR quality  
11 rating system.<sup>30</sup> Since these locations have high-quality VR data, all-cause mortality estimates are driven  
12 by national data and the VR system is a robust source of data for HIV deaths.

13 Locations with lower quality VR make up Group 2B, and locations without any VR data are Group 2C.

14 For HIV-specific mortality estimates, Group 2A locations used mortality output from the ST-GPR process  
15 due to the high quality of their VR systems. Group 1A and 1B locations used Spectrum output, while  
16 Group 2B and 2C locations used output from cohort incidence bias adjusted (CIBA) deaths due to  
17 HIV/AIDS from the Spectrum model.<sup>31</sup>

18 Outputs were modeled to include an under-1 age group without the early-, late-, and post-neonatal  
19 groups. To attribute under-1 deaths from Spectrum to these neonatal groups, we make the assumption  
20 that all HIV deaths that occur in the first year of a child’s life occur in the post-neonatal stage (after 28  
21 days), since the literature on HIV in these age groups is still unclear but seems to indicate higher  
22 mortality in the post-neonatal stage, and there is no clear evidence to guide alternative methods of age-  
23 splitting under-1 deaths due to HIV.<sup>12,13</sup>

1 **Section 2.6.7. Envelope Calculation**

2 In general, the all-cause and HIV-deleted envelopes were generated by synthesizing the results from the  
3 with-HIV and HIV-free life tables, along with selected HIV mortality from ST-GPR, Spectrum output, or  
4 cohort incidence bias adjusted Spectrum output (CIBA-Spectrum). We used with-HIV and HIV-free life  
5 tables in order to ascertain the implied HIV from the model life table system.

6 For age groups under age 5, we used the under-5 results from the age-sex process described in section  
7 2.2.14. In Group 1A and 1B locations, we generated a scalar based on Spectrum results of HIV-specific  
8 and non-HIV deaths to generate HIV-deleted envelope deaths based on the all-cause results from the  
9 envelope. In other locations, we directly subtracted mortality from ST-GPR or Spectrum, after capping  
10 HIV at 90% of the all-cause envelope, to generate the HIV-deleted envelope. As mentioned previously,  
11 we made the assumption that all under-1 HIV-specific deaths occur in the post-neonatal stage.

12 In all groups except Group 1A, for all ages above 5 and under 15, we subtracted mortality from  
13 Spectrum or ST-GPR directly from the all-cause with-HIV envelope, after capping HIV at 90% of the all-  
14 cause envelope. In Group 1A, we took the HIV-free mortality and add mortality from Spectrum directly  
15 to generate the all-cause with-HIV envelope.

16 For ages above 15 and below 80, we applied separate approaches for Group 1A and 1B locations  
17 compared to Group 2A, 2B, and 2C locations. Group 1A and 1B locations used HIV mortality determined  
18 by an ensemble model where we averaged the implied HIV mortality from the model life table process  
19 and the HIV mortality output by Spectrum, which are intrinsically linked by the draw-level HIV-free  
20 mortality age pattern. Group 2A, 2B, and 2C locations used HIV mortality directly from ST-GPR and CIBA-  
21 Spectrum. For all locations except Group 1A, we subtracted the calculated HIV mortality from the all-  
22 cause envelope to generate HIV-deleted envelope deaths. In Group 1A, we added the HIV mortality to  
23 HIV-free mortality from the MLT process to calculate all-cause mortality, thus effectively allowing all-  
24 cause mortality from the demographic estimation process to be changed based on our ensemble HIV  
25 estimates. This reflects our view about the inherent uncertainty in all-cause mortality estimates largely  
26 based on sibling survival data in Group 1A locations and the various assumptions on mortality and  
27 program data required in both EPP and Spectrum.

28 For the age group 80 and above, we first approximated the over-80 mortality rate by using our life table  
29 output and divided  $l_x$  by  $T_x$  from the age 80-84 values in the country-specific life tables. We then  
30 calculated a scalar from the approximated all-cause mortality rate from the life table to the all-cause  
31 mortality rate by taking the envelope deaths/populations. We applied this scalar to both the with-HIV  
32 and HIV-free life tables to rescale these numbers and the implied HIV death rate to the envelope space.  
33 Finally, HIV-deleted and all-cause mortality were determined by the same approaches as used for other  
34 ages above 15.

35 **Section 2.6.8. Life Table Calculation**

36 Generally, life tables were calculated using a consistent approach to those used in calculating the  
37 envelope. There are, however, a few differences in calculation, particularly related to sex and location  
38 aggregation.

1 For Group 1A locations, we took the HIV-free life table results and multiplied by the ratio to obtain all-  
2 cause life table results. In all other locations, we took the all-cause life table and divided by the ratio to  
3 obtain the HIV-free life table results, consistent with their handling in the envelope process.

4 For aggregate locations, we generated aggregated mx and ax values by weighting mx by population and  
5 ax by deaths (here, calculated by  $mx * population$ ). From this, we population- and death-weighted  
6 regional mx and ax values, which we used to generate region-level life tables.

7 In the under-5 age groups, we applied a similar approach to calculating the envelope. However, when  
8 aggregating the all-cause life table for countries with subnational locations, we substituted the national-  
9 level under-5 results instead of using the aggregated mx and ax values from the subnational units. We  
10 did this in all aggregate countries except South Africa, where we aggregated the national results from  
11 subnational results, consistent with our approach in 5q0, 45q15, and the model life tables. We  
12 substituted in the under-5 national aggregates because we want to preserve the estimated 5q0 results  
13 from our 5q0 data synthesis and age/sex splitting modeling processes, which are not necessarily  
14 equivalent to those generated by the aggregated mx and ax values from the model life table process.  
15 For HIV-deleted life tables, we aggregated subnational units using the regular weighting scheme.

#### 16 [Section 2.6.9. HIV crude death rates for under-5 and ages 15-59](#)

17 As a result of the envelope and life table calculation steps, the Reckoning produces final HIV death rates,  
18 based on the results of the Envelope Calculation portion of the Reckoning process.

19

#### 20 [Section 2.7. Age-specific mortality estimation for all GBD age-groups: with and without HIV](#)

##### 21 [Section 2.7.1. Age-specific mortality without discontinuities \(with HIV/AIDS\)](#)

22 Age-specific mortality rates without fatal discontinuities were generated using the model life table  
23 system (section 2.5), age-sex model (section 2.2.14), and HIV reckoning process (section 2.6.7)  
24 depending on the location groups detailed in section 2.6.6.

25 For mortality rates in age groups younger than age 5, age-specific mortality was taken from our age-sex  
26 model that split U5MR into mortality for age groups enn, Inn, pnn, and ages 1-4. For Group 1B, 2A, 2B,  
27 and 2C locations, age-specific mortality rates in ages 5 and older were generated using the GBD model  
28 life table system described in section 2.5. For Group 1A locations, age specific mortality with HIV was  
29 produced as the sum of HIV-free mortality rates generated in the first step of the model life table system  
30 described in section 2.5 and the results of the ensemble model for HIV-specific mortality described in  
31 section 2.6.

##### 32 [Section 2.7.2. HIV-deleted age-specific mortality](#)

33 HIV-deleted age-specific mortality was used in cause of death analyses in GBD 2016 to avoid the  
34 spillover effect of HIV mortality into other causes, particularly for locations affected by high HIV burden.  
35 We used the difference between the age-specific mortality with HIV, without fatal discontinuities as  
36 described in section 5.1 and the HIV-specific mortality as a result of the HIV reckoning process described  
37 in section 2.6.7.

1 [Section 2.7.3. Add fatal discontinuities](#)

2 In our mortality estimation process, we excluded data from years with fatal discontinuities to ensure  
3 that these sudden idiosyncratic increases in mortality would not affect long-term trends in mortality for  
4 a given country. This section details how we added the deaths due to fatal discontinuities to the all-  
5 cause mortality envelope and life tables. For more information on how fatal discontinuity death  
6 numbers were estimated, please see Section 4.

7 To incorporate deaths due to fatal discontinuities into the mortality envelope, 1,000 draws of deaths  
8 due to fatal discontinuities were added pairwise to 1,000 draws of the with-HIV mortality envelope for  
9 each location, sex, and age group. Ninety-five percent uncertainty intervals were calculated as in other  
10 processes, taking the 97.5% and 2.5% quantiles of the summed draws.

11 To incorporate fatal discontinuity deaths into the life table, we created a ratio of deaths with fatal  
12 discontinuities to deaths without fatal discontinuities and applied the ratio as a scalar to the without-  
13 fatal-discontinuity mortality rate ( ${}_n m_x$ ) produced in the HIV Reckoning step, discussed in section 2.6.7.  
14 For under 1 age groups, we have scalars for early neonatal (enn), late neonatal (lnn) and post neonatal  
15 (pnn) ages. In order to calculate the probability of death for the under 1 age group ( ${}_1 q_0$ ), we pulled  
16 results from the under-5 age and sex pattern of mortality process (section 2.2.14.), calculated with-fatal  
17 discontinuity  $m_x$  for enn, lnn, and pnn, back-calculated  $q_x$  for enn, lnn, and pnn, and then aggregated to  
18  ${}_1 q_0$  using the equations in section 2.2.14. In addition to the granular under-1 age groups, we also used  
19 the  ${}_4 q_1$  generated by the age-sex model. Because we only had mortality and fatal discontinuity death  
20 numbers for the aggregate age group 80+, we applied the scalars for this group to the granular age  
21 groups of the life table up to 100 in order to calculate the life table with fatal discontinuities for older  
22 age groups.

23 [Section 2.7.4. Age-specific deaths with discontinuities and HIV/AIDS](#)

24 From the process described in section 2.7.3, we produced location-, sex-, year-, and age- specific death  
25 numbers including fatal discontinuities.

26 [Section 2.7.5. Life tables with HIV/AIDS and fatal discontinuities](#)

27 From the process described in section 2.7.4, we produced location-, sex-, and year-specific child  
28 mortality ( $5q_0$ ), adult mortality ( $45q_{15}$ ), and life expectancy at birth and age 50.

29

30

## 1 Section 3. Fertility and Birth Estimation Methods

### 2 Section 3.1. Input data

3 For developed countries with complete vital registration systems, we primarily utilized tabulated TFRs  
4 provided by the Human Fertility Database (HFD), a repository of rigorously-vetted empirical fertility data  
5 curated by the Max Planck Institute for Demographic Research (MPIDR). Also managed by MPIDR, the  
6 Human Fertility Collection (HFC) provided a plethora of additional data for developing countries and  
7 countries that lack complete vital registration systems. Though they are also vetted prior to inclusion in  
8 the database, not all the data from the HFC meet the complete quality standards of those from the HFD,  
9 nor are they all empirical in nature. Accordingly, from the HFC we excluded all research estimates  
10 applying methods beyond standard demographic techniques used to compute TFR from raw empirical  
11 data. We additionally maintained all HFC data from vital statistics, tabulated surveys, and official  
12 government statistical reports.

13 At the national level we extracted all surveys in the GHDx that fully met complete birth history  
14 requirements, applying standard direct estimation methods to generate age-specific fertility rates  
15 (ASFR), which we collapsed to TFR. Where microdata were unavailable, we extracted tabulated TFRs  
16 from the corresponding survey reports. At the subnational level, we re-utilized surveys that had been  
17 extracted for GBD 2015, which included both complete and summary birth histories. Additional data  
18 sources included provisions from international collaborators as well as tabulated reports from national  
19 statistics offices. In total, 20, 260 location years of data were included in our model over the 1950-2016  
20 estimation period. For GBD 2017 we hope to expand our extractions to all available summary birth  
21 histories and registrations of live births, as well as hope to receive more data directly from collaborators.

### 22 Section 3.2. Modeling strategy

#### 23 Section 3.2.1. Overview

24 In previous iterations of GBD, fertility estimates from UN WPP were used for all national locations for  
25 which they were available. For subnational locations and miscellaneous countries not covered by UN  
26 WPP we modeled total fertility rate (TFR) using spatiotemporal Gaussian process regression (ST-GPR).  
27 The specifics of the GBD 2015 ST-GPR methodology for these locations are described in the appendix to  
28 the GBD 2015 mortality and causes of death paper.<sup>32</sup>

29 To improve upon estimates used in the past and ensure consistency within our processes, we expanded  
30 the use of ST-GPR to model TFR for all 755 national and subnational locations included in GBD 2016.

#### 31 Section 3.2.2. Trend estimation – Total Fertility Rate

32 We used ST-GPR to synthesize point estimates from multiple data sources and derive a complete time  
33 series for total fertility rate. This method has been used extensively in GBD and related studies, and  
34 accounts for uncertainty pertaining to each point estimate while borrowing strength across geographic  
35 space and time. Briefly, we assumed the Gaussian process was defined by a mean function  $m(\bullet)$  and  
36 covariance function  $Cov(\bullet)$ .

37 We estimated the mean function using a two-step approach. Specifically,  $m_c(t)$  can be expressed as:

$$38 \quad m_c(t) = X\beta + h(r_{c,t})$$

39 where  $X\beta$  is a linear model and  $h(r_{c,t})$  is a smoothing function for the residuals; and  $r_{c,t}$  is derived from  
40 the linear model. The following linear model was used for the estimation of TFR:

1 
$$\text{logit}(tfr_{c,t}/9.5) = \beta_0 + (\beta_1 + \omega_{1R[c]})\text{medu}_{c,t} + (\beta_2 + \omega_{2R[c]})\text{lnLDI}_{c,t} + \alpha_c + \gamma_{R[c]} + \varepsilon_{c,t}$$

2

3 where  $tfr_{c,t}$  is TFR for country  $c$  year  $t$ ;  $\text{medu}_{c,t}$  and  $\text{lnLDI}_{c,t}$  are the level of maternal education and  
4 natural log of per capita lag-distributed income for country  $c$  and year  $t$ ;  $\alpha_c$  and  $\gamma_{R[c]}$  are country and  
5 region random intercepts; and  $\omega_{iR[c]}$  are region random slopes for the aforementioned covariates.  
6 These estimates were then modeled through ST-GPR.

7 The upper bound on TFR of 9.5 was informed by data from the 1981 Jordanian demographic survey,  
8 from which a TFR of 9.1 was calculated for 1972. This represented the maximum observed TFR from all  
9 available location-years of data.

10 Hyper-parameters for the spatiotemporal smoothing and Gaussian-process regression stages were  
11 dichotomized and selected based on the extent of vital registration completeness in a given country, as  
12 determined previously assessed for CoDEm.<sup>32</sup> Accordingly, countries were categorized as either data rich  
13 or not data rich. Data rich countries were assigned hyper-parameters that drew relatively less strength  
14 over space and time and yielded less variability in the mean function of the Gaussian process, such that  
15 our predictions would be more driven by high-quality, in-country data. The converse applied to  
16 countries not deemed data rich.

17 Random draws of 1,000 samples were obtained from the distributions above for every GBD location.  
18 Ninety-five percent uncertainty intervals were calculated by taking the ordinal 25 and 975th draws from  
19 the sample distribution.

20 Lastly, we scaled the outputs of the Gaussian process regression for subnational locations to national-  
21 level estimates, except in the cases of China (where Hong Kong and Macao do not exhibit trends in  
22 fertility reflective of the mainland) and the UK (where much of our high-quality data spanning the  
23 complete estimation period was at the level of the four member states). In these two cases, the national  
24 estimates were instead population-weighted aggregates of the first tier of subnational locations.  
25 Estimates for secondary, and, in the case of the UK, tertiary, tiers of subnational locations were still  
26 scaled to those of their respective geographic parents.

### 27 [Section 3.2.3. Trend estimation – Age-specific fertility rate and live births](#)

28 For all locations reported by UN WPP, we scaled interpolated UN WPP age-specific fertility rates (ASFR;  
29 15-49) to GBD 2016 estimates of TFR. Interpolation was necessary, as UN WPP only produces estimates  
30 for fertility indicators in five-year intervals. For locations not covered by UN WPP—e.g. subnational  
31 units and several small countries— we generated age-patterns using the model fertility table method  
32 used in GBD 2015. Subnational age-patterns were scaled to national age-patterns in a manner similar to  
33 that for TFR above. Finally, we applied our estimated ASFR to GBD 2016 populations to produce full time  
34 series for estimates of live births.

35

36

## 1 Section 4. Socio-Demographic Index (SDI) analysis

### 2 Section 4.1. Case definition

3 The Socio-demographic Index (SDI) is a composite indicator of development status constructed for GBD  
4 2015 whose components are strongly correlated with health outcomes. It is the geometric mean of 0 to  
5 1 indices of total fertility rate, mean education for those aged 15 and older, and lag distributed income  
6 per capita.

### 7 Section 4.2. Modeling strategy

8 SDI was calculated using the Human Development Index (HDI) methodology, wherein an index value was  
9 determined for each of the covariate inputs (log LDI, mean educational attainment over age 15, and  
10 TFR). For GBD 2015 these indices were computed on the basis of a relative scale, in which the upper and  
11 lower bounds were established by the maximum and minimum observed values, respectively, for each  
12 input over the entire estimation period of 1980-2015.

13 Prompted by the observations that the scales (and by extension SDI) were sensitive to the addition of  
14 new subnational locations as GBD becomes more granular and to the length of the time period over  
15 which SDI is computed, for GBD 2016 we implemented fixed scales in determining individual indices.  
16 Thus, an index score of 0 now represents the minimum level of each covariate input past which selected  
17 health outcomes can get no worse. An index score of 1 represents the maximum level of each covariate  
18 input past which selected health outcomes cease to improve. As a composite, a location with an SDI of 0  
19 would have a theoretical minimum level of development relevant to health, while a location with an SDI  
20 of 1 would have a theoretical maximum level of development relevant to health.

21 We selected the minima and maxima of the scales by examining the relationships each of the inputs had  
22 with life expectancy at birth and under-5 mortality and identifying points of limiting returns at both high  
23 and low values, if they occurred prior to theoretical limits (e.g., a TFR of 0). The final scales are  
24 summarized in the table below.

| Input                                                | Lower Bound                         | Upper Bound                |
|------------------------------------------------------|-------------------------------------|----------------------------|
| TFR                                                  | 1.5 <sup>a</sup>                    | 8                          |
| LDI per capita                                       | 250 USD (5.52 log USD) <sup>b</sup> | 60,000 USD (11.00 log USD) |
| Mean educational attainment<br>for ages 15 and older | 0 years                             | 17 years                   |

25 <sup>a</sup> The low point of limiting returns for TFR was identified at 1 during GBD 2015; however, incorporating  
26 feedback with regard to accounting for a pattern of TFR rebound in highly developed countries, we  
27 instead set the lower limit of TFR at 1.5.

28 <sup>b</sup> The minimum for the LDI scale was originally set at the theoretical limit of 0 USD, as we did not  
29 observe an asymptotic relationship between log(LDI) and  $E_0$  or  $5q_0$  at lower values of log(LDI).  
30 Empirically, however, we also did not observe an LDI below 350 USD (5.86 log USD) for the estimation  
31 period 1970-2016. In log-space, this meant that approximately half of our scale was not being utilized,  
32 compressing the observed variation in LDI and diminishing its meaningful contribution to SDI.  
33 Accordingly, we set the lower limit on LDI to 250 USD (5.52 log USD) to ensure we were fully utilizing the  
34 range of the scale to capture its variation across space and time, as is the case with the other two inputs.



1 Using the limits on the scales described above, we computed the index scores underlying SDI  
2 analogously to GBD 2015 as follows:

$$3 \quad I_{cly} = \frac{(C_{ly} - C_{low})}{(C_{high} - C_{low})}$$

4 Where  $I_{cly}$  – the index for covariate  $C$ , location  $l$ , and year  $y$  – is equal to the difference between the  
5 value of that covariate in that location-year and the lower bound of the covariate divided by the  
6 difference between the upper and lower bounds for that covariate. If the values of input covariates fell  
7 outside the upper or lower bounds (e.g. LDI per capita greater than 60,000 USD), they were mapped to  
8 the respective upper or lower bounds. We also note that the index value for TFR was computed as  $1 -$   
9  $I_{TFRly}$ , as lower TFRs correspond to higher levels of development, and thus higher index scores. For GBD  
10 2016 we expanded the computation of SDI to 755 national and subnational locations spanning the time  
11 period 1970-2016.

12 The composite Socio-demographic Index is the geometric mean of these three indices for a given  
13 location-year. The cutoff values used to determine quintiles for analysis were then computed using  
14 country-level estimates of SDI for the year 2016, excluding countries with populations less than 1  
15 million.

16 We further aimed to validate the use of SDI by regressing it in a variety of forms against life expectancy  
17 at birth, 5q0, 35q15, and 20q50. We found that SDI generally is as capable of predicting these  
18 demographic indicators as the previous SDI, and also as the inputs. We also found that in incorporating  
19 year, we did not substantially reduce the coefficients for SDI. Additionally, in testing lags of 2-10 years,  
20 we found the version with no lag to be the most predictive.

### 21 [Section 4.3. Age-sex-specific relationships between SDI and death rates](#)

22 In order to evaluate the relationship between SDI and mortality, we fit a Gaussian process regression  
23 using a linear prior to the mean function within a stochastic partial differential equation (SPDE)  
24 framework.

25 We first assume the following:

$$26 \quad \ln(Y_{ias}) \sim N(\mu_i, \sigma^2)$$

27 Where  $Y_{ias}$  is the all-cause mortality rate for a given level of SDI ( $i$ ), age group ( $a$ ), and sex ( $s$ ).

28 We then specify a linear prior to the mean  $\mu_i$ :

$$29 \quad \mu_i = \alpha + \beta(SDI) + z_i$$

30 Where

$$31 \quad z_i \sim GP(0, \Sigma_M)$$

32  $GP$  refers to a Gaussian process, and  $\Sigma_M$  refers to the Matern covariance function.

33 Using SPDE, we specified additional priors on the range, variance, and precision of the mean function, as  
34 well as selected the number of underlying bases. These hyperparameters were chosen empirically and

1 were identical for all age-sex combinations. Values for the selected hyperparameters are displayed in  
 2 the table below.

| Hyper-parameter | Value                               |
|-----------------|-------------------------------------|
| Range           | 0.2                                 |
| Variance        | 1                                   |
| Precision       | $1 \times 10^{10}$                  |
| Number of bases | 3 (mesh points at 0.25, 0.50, 0.75) |

3  
 4 Regressions were run separately by age and sex, using observed all-cause mortality rates from all years  
 5 1970-2016 to produce 10,000 simulations per level of SDI from 0 to 1 in increments of .005. We fit  
 6 models on observations from all countries estimated in GBD and included state and province level  
 7 estimates in lieu of national estimates for Brazil, China, and India due to their large populations (> 200  
 8 million) and small number of state-level units modelled in GBD (BRA – 27, IND – 31, CHN – 33) relative to  
 9 population. Though the United States and Indonesia also fall under the designation of large-population  
 10 (> 200 million), we fit models on national-level observations instead of state/province-level observations  
 11 for these two countries as a result of the undue influence from the relatively large number of state-level  
 12 units modelled in GBD relative to population (USA – 51, IDN – 34). Country and region dummy variables  
 13 used in GBD 2015 were no longer included in this analysis. All models were fit using the INLA package in  
 14 R.

15 [Section 4.4. SDI quintiles](#)

16 All GBD 2016 locations were assigned to SDI quintiles based on their calculated SDI value in the year  
 17 2016. The quintiles (Low SDI, Low-middle SDI, Middle SDI, High-middle SDI, and High SDI) were  
 18 generated using national-level SDI for the year 2016 from countries with populations greater than 1  
 19 million. The cutoffs represent each 20<sup>th</sup> percentile from the list of aforementioned values and were  
 20 applied to the SDI values for the year 2016 for all GBD locations to assign them to specific groups.

21 **Table: SDI quintile cutoffs**

| Quintile    | Lower bound | Upper bound |
|-------------|-------------|-------------|
| Low         | 0           | 0.450402989 |
| Low-middle  | 0.450402989 | 0.637800918 |
| Middle      | 0.637800918 | 0.747342101 |
| High-middle | 0.747342101 | 0.849027407 |
| High        | 0.849027407 | 1           |

22

## 1 Section 5. Fatal Discontinuities Estimation

### 2 5.1 Input data

3 Input data for fatal discontinuities are compiled from a range of sources, including country vital  
4 registration (VR) data; international databases that capture several cause-specific fatal discontinuities;  
5 and supplemental data in the presence of known issues with data quality or representativeness, or time  
6 lags in reporting.

#### 7 *Subnational locations and population splitting*

8 In locations where we produced estimates at the subnational level for GBD 2016, deaths due to all fatal  
9 discontinuity causes were assigned to the relevant subnational location(s) when that information could  
10 be obtained either through country data sources (e.g., VR) or through additional online research. If no  
11 subnational location could be found, the deaths were split proportionally by population across all  
12 subnational locations.

13 In locations that have experienced boundary changes or split from other locations that we currently  
14 estimate (e.g., the former Yugoslavia, Czechoslovakia, the Soviet Union, Sudan and South Sudan), we  
15 split deaths due to events that occurred prior to boundary changes proportionally based on the  
16 populations residing within the boundaries of present-day locations unless we found documentation  
17 that clearly indicated whether the event and corresponding deaths occurred in one of the present-day  
18 GBD 2016 locations.

#### 19 *Locations with 4- or 5-star data quality ratings*

20 For countries and territories assigned 4- or 5-star data quality ratings we prioritized data from country-  
21 specific vital registration.<sup>30</sup> VR data for fatal discontinuities was exclusively used in 4- and 5-star  
22 locations unless there was well-known data quality issues or discrepancies in the cause of death data  
23 reporting related to a particular event (e.g., supplemental death data for Louisiana was used for  
24 Hurricane Katrina because of established data reporting issues).

#### 25 *Locations with less than 4-star data quality ratings*

26 For countries and territories assigned data quality ratings below 4 stars, we compared VR with data  
27 available from alternative sources for Exposure to forces of nature, taking the highest death estimate  
28 available from all sources. For other fatal discontinuity causes, we disregarded lower quality VR and  
29 used well-established databases by type of fatal discontinuity. Whenever specific events were identified  
30 that did not have corresponding data points within these databases, we used supplemental data  
31 sources, including scientific literature.

32 Major data sources other than country vital registration for each fatal discontinuity cause follow.

33

34 **Conflict and terrorism.** Data for conflict and terrorism come from the Uppsala Conflict Data Program  
35 (UCDP), International Institute for Strategic Studies, and Robert S. Strauss Center for International  
36 Security and Law. The table below provides details about the various datasets we utilized from these  
37 sources, the dates they were last accessed, and the years for which we used the data provided.

| Data source name                                                   | Date accessed | Years of data downloaded | Type of data included                                                                                                                                                                                                                               |
|--------------------------------------------------------------------|---------------|--------------------------|-----------------------------------------------------------------------------------------------------------------------------------------------------------------------------------------------------------------------------------------------------|
| <b>Uppsala Conflict Data Program<sup>33</sup></b>                  |               |                          |                                                                                                                                                                                                                                                     |
| Battles                                                            | 10/6/16       | 1989-2015                | Armed conflict: incompatibility that concerns government and/or territory over which the use of armed force between the military forces of two parties, of which at least one is the government of a state, which resulted in deaths                |
| Non-state                                                          | 10/6/16       | 1989-2015                | The use of armed force between two organized armed groups, neither of which is the government of a state, which results in deaths                                                                                                                   |
| One-sided                                                          | 10/6/16       | 1989-2015                | The use of armed force by the government of a state or by a formally organized group against civilians which results in deaths                                                                                                                      |
| Georeferenced Event Dataset                                        | 10/6/16       | 1989-2015                | UCDP battles, non-state, and one-sided conflict deaths with the most disaggregated location information available                                                                                                                                   |
| PRIO Battles Deaths Dataset                                        | 10/6/16       | 1970-1988                | Armed conflict (civil wars, etc.)                                                                                                                                                                                                                   |
| <b>International Institute for Strategic Studies</b>               |               |                          |                                                                                                                                                                                                                                                     |
| Armed Conflict Dataset                                             | 10/6/16       | 1997-Present             | Insurgency, Inter-state, Intra-state conflict deaths                                                                                                                                                                                                |
| <b>Robert S. Strauss Center For International Security And Law</b> |               |                          |                                                                                                                                                                                                                                                     |
| Armed Conflict Location and Event Dataset (ACLED)                  | 10/6/16       | 1997-2016                | Actions of opposition groups, governments, and militias in selected locations in Africa and Asia, specifying the exact location and date of battle events, transfers of military control, headquarter establishment, civilian violence, and rioting |
| Social Conflict Analysis Database (SCAD)                           | 10/6/16       | 1990-2016                | Protests, riots, strikes, inter-communal conflict, government violence against civilians, and other forms of social conflict (covers Africa and Latin America)                                                                                      |

1

2 Supplemental online research was conducted for recent conflicts where the databases above were not  
3 up-to-date. For country-years where multiple sources provided estimates, we prioritized sources in the  
4 following order: (1) country VR data, if death estimates were highest of all sources; (2) UCDP; (3) IISS; (4)  
5 country VR if death estimates were not the highest of all sources; (5) Robert Strauss Center; (6) online  
6 supplemental research.

7 **Exposure to forces of nature, other injury causes, and protein-energy malnutrition.** The Centre for  
8 Research on the Epidemiology of Disasters' International Disaster Database (EM-DAT) served as the  
9 primary non-VR source of fatal discontinuities due to exposure to forces of nature (i.e., natural  
10 disasters); other transport injuries (eg, plane, train, and boat accidents); poisonings; fire, heat, and hot  
11 substances; other exposure to mechanical forces (eg, building collapse); and protein-energy malnutrition  
12 (ie, famine or severe drought). Data from EM-DAT were last accessed March 29, 2017. Supplemental  
13 online research was conducted for events where EM-DAT was not up-to-date.

14 For country-years where multiple sources provided estimates, we prioritized sources in the following  
15 order: (1) country VR data, if data quality rating is 4 or 5 stars; (2) country VR data if data quality rating is

1 less than 4 stars and death estimates were highest of all sources; (3) EM-DAT; (4) online supplemental  
2 research. Exceptions were made where it was clear that VR systems had been compromised by the  
3 event being measured.

4 ***Epidemic infectious diseases.*** In GBD 2016, we included fatal discontinuities due to a subset of  
5 infectious diseases: meningococcal meningitis (or meningococcal infection), diarrheal disease caused by  
6 cholera, and Ebola virus disease. These diseases were included because (1) existing modelling strategies  
7 (for meningitis and cholera) did not optimally capture epidemic mortality levels and trends; and (2) they  
8 contributed to significant total fatalities in a given location-year. Other infectious diseases for which the  
9 latter is true – high death rates in the presence of an outbreak or epidemic – are currently modelled  
10 with alternative cause of death methods (eg, natural history models for measles and yellow fever),  
11 which allow for greater variation year-over-year if or when outbreaks occur. In future iterations of the  
12 GBD, we plan to revisit the inclusion criteria for infectious diseases as fatal discontinuities and develop  
13 more of an ensemble approach to modelling causes that can be both endemic (and thus result in more  
14 uniform levels and trends over time) and epidemic (and subsequently lead to rapid increases – and  
15 decreases – in deaths for a given location-year).

16 The Global Infectious Diseases and Epidemiology Network (GIDEON) served as the primary data source  
17 for collating cholera and meningococcal meningitis or meningococcal infection death reports.<sup>34,35</sup> For  
18 any year in which cholera or meningococcal meningitis deaths were recorded in a country or territory  
19 covered by the GBD, we directly extracted reported deaths from 1970 to 2016. When there were  
20 reporting gaps in cholera or meningococcal meningitis deaths over this period of time and the World  
21 Health Organization (WHO) annual cholera or meningitis reports had death reports for those years, we  
22 used the WHO reports.

23 The input data for deaths due to Ebola virus disease came in two forms: (i) modelled estimates for the  
24 West African outbreak from 2013 to 2016 provided by the World Health Organization (WHO) focused  
25 specifically on the three worst-affected countries (Liberia, Guinea, and Sierra Leone) and (ii) literature  
26 searches for reported deaths due to Ebola virus disease not captured by the West African dataset.

## 27 **5.2 Modeling strategy**

28 All input data for fatal discontinuity causes were run through the causes of death data formatting and  
29 mapping process<sup>30</sup>, with the exception of deaths due to Ebola virus disease, where WHO data already  
30 contained age- and sex-specific information.

### 31 ***Uncertainty analysis for input and draw-level input to age-sex splitting***

32 Uncertainty intervals for deaths due to conflict and terrorism were generated using UCDP high and low  
33 death estimates, except in the case of Iraq 2003-2016, as explained above. In cases where low and high  
34 estimates were not included in the available data, the regional average uncertainty interval was applied  
35 to the available death estimate across all fatal discontinuity causes.

36 We assumed a normal distribution using the mean deaths and standard deviation based on high and low  
37 estimates. The standard deviation was capped at the mean divided by 1.96 in order to ensure that 95%  
38 of the 3,000 draws generated were greater than zero. Non-positive draws were dropped, and 1,000  
39 draws were sampled from the remaining set of positive draws. These 1,000 positive draws were used for  
40 final calculations of means and uncertainty intervals.

1 **Section 6. Additional Methods Information**

2 **6.1 GBD world population age standard**

3 Age-standardized populations in the GBD are calculated using the GBD world population age standard,  
4 which is calculated using methods detailed in Ahmad et al 2001.<sup>36</sup> Briefly, we used the age-specific  
5 proportional distributions of all national locations from the World Population Prospects 2012 revision  
6 for all years from 2010 to 2035 and generated a standard population structure by taking the non-  
7 weighted mean across all the aforementioned country-years. For consistency and comparability across  
8 recent iterations of the GBD, we used the same standard population structure as used in GBD 2013 and  
9 GBD 2015. The values used for the age standard are found in Appendix Table 6.

10 **6.2 Generating population estimates in older age groups**

11 GBD 2016 expands the estimated age groups from a terminal age group of 80+ to 95+. For some  
12 population data sources, 5-year age group populations were not available above age 80. In these cases,  
13 we used a model to age populations into the additional age groups: 80-84, 85-89, 90-94, and 95+. First  
14 we estimated survival for single-year age groups by sex and year for all locations included in GBD 2016,  
15 and then applied a cohort component model to age 79-year-olds forward to estimate population  
16 exposure by age and year in the detailed 80-plus age groups.

17 **6.3 Categorising special populations**

18 The GBD uses a *de facto* definition of populations in all GBD estimation. Since populations are primarily  
19 taken from UN Population Division’s World Population Prospects, which uses a strict *de facto* definition,  
20 we strive to use the same definition in capturing deaths that occur where the deceased died in a country  
21 where they did not hold citizenship and/or residency. The table below describes the idea criteria used  
22 for some specific examples of these complex situations.

23 Though we strive to ensure that all mortality data used in GBD estimation follows these same *de facto*  
24 rules, we are limited by the collection methods and information provided in the data source itself. We  
25 have made adjustments in locations where we know that death sources did not use a *de facto* definition  
26 but are aware that there may be additional unknown cases where our deaths source and population  
27 source do not match in their definition of included populations.

28

1 **Table: Preferred country of death assignments for non-citizen/resident deaths**

| Category of person                                                                                                                                         | How do we assign country of death?                          |
|------------------------------------------------------------------------------------------------------------------------------------------------------------|-------------------------------------------------------------|
| a legal permanent resident or temporary resident (student, worker assigned overseas by their domestic employer, migrant worker temporarily in the country) | Assign to the country of residence at the time of the death |
| someone on a tourist visa                                                                                                                                  | Assign to the country he/she is visiting                    |
| an illegal immigrant/visitor                                                                                                                               | Assign to the country where he/she migrated to              |
| a mercenary                                                                                                                                                | Assign to the country where he/she worked                   |
| a soldier or other government official or contractor stationed overseas                                                                                    | Assign to the country where he/she is from                  |
| a person in a refugee camp just outside a country's border                                                                                                 | Assign to the country where they are citizens               |
| on the high seas or coastal waters/below walls of a country where refugees tried to flee                                                                   | Assign to the country where they are citizens               |

2

3 **6.4 Estimating correlation**

4 For the estimation of correlation, we used the Pearson correlation coefficient as estimated by Stata  
5 version 14, which uses the following function<sup>37</sup>:

6 
$$\hat{\rho} = \frac{\sum_{i=1}^n w_i (x_i - \bar{x})(y_i - \bar{y})}{\sqrt{\sum_{i=1}^n w_i (x_i - \bar{x})^2} \sqrt{\sum_{i=1}^n w_i (y_i - \bar{y})^2}}$$

7 where  $w_i$  are the weights, if specified, or  $w_i = 1$  if weights are not specified.  $\bar{x} = (\sum w_i x_i) / (\sum w_i)$  is the  
8 mean of  $x$ , and  $\bar{y}$  is similarly defined.

9 **6.5 Calculating annualised rates of change**

10 Annualized rates of change were calculated by taking the log of 5q0 in a target year, represented as  $y+t$ ,  
11 divided by the 5q0 at the baseline year  $y$ , and divided by the difference in years between the target and  
12 baseline years, represented as  $t$ . This is illustrated by the equation below.

13 
$$aroc_{5q0} = \ln\left(\frac{5q0_{y+t}}{5q0_y}\right) / (t)$$

14

15 **6.6 Causes of death data star rating calculation**

16 GBD estimates are most accurate when computed with a full time series of complete vital registration  
17 with a low percentage of garbage codes. For GBD 2016, we developed a simple star-rating system from  
18 0 to 5 to give a picture of the quality of data available in a given country over the full time series used in  
19 GBD estimates. Countries improve in the star rating as they increase availability, completeness, and  
20 detail of their mortality data and reduce the percentage of deaths coded to ill-defined garbage codes or  
21 highly aggregated causes.

22

23 To assign stars, we measure the proportion of deaths registered to a well-defined cause from 1980 to  
24 2016. We call this proportion “percent well-certified.” We measure this proportion for each location-

1 year of vital registration and each verbal autopsy study separately, and then combine the yearly  
2 measurements into a percent well-certified for the full time series.

3  
4 For each year of vital registration, percent well-certified is:

$$5 \quad pct_{wellcertified} = completeness * (1 - pct_{majgarbage})$$

6  
7  
8 Where:

$$9 \quad completeness = \frac{registered\ deaths}{GBD\ mortality\ envelope}$$

$$10 \quad pct_{majgarbage} = \frac{deaths\ coded\ to\ level\ 1\ or\ 2\ garbage\ or\ highly\ aggregated\ cause}{registered\ deaths}$$

11  
12  
13 Simplifying this equation, one can see that in this case “percent well-certified” is simply the number of  
14 deaths that are registered to a well-defined cause (those codes which are not Level 1 or 2 garbage or  
15 highly aggregated) divided by the GBD mortality envelope. More information about ICD10 and ICD9  
16 codes assigned to Level 1 or 2 garbage can be found in the GBD 2016 causes of death paper.<sup>38</sup>

17  
18 For each verbal autopsy data source, percent well-certified is:

$$19 \quad pct_{wellcertified} = VerbalAutopsyAdjustment * (1 - pct_{majgarbage})$$

20  
21  
22 Where:

$$23 \quad VerbalAutopsyAdjustment = SubAdj * RegAdj * AgeSexCoverage$$

24  
25 And:

26  
27 SubAdj:

28 10% for subnationally representative studies, 100% for nationally representative  
29 studies. This adjustment, while arbitrary in its specific value, reflects the bias that can be  
30 associated with studies that only cover a potentially non-representative sample of a  
31 country’s population.

32 RegAdj:

33 64% for all verbal autopsy data sources. This accounts for the inaccuracy of verbal  
34 autopsy in assigning cause of death compared to medically-verified vital registration.  
35 The specific multiplier 0.64 is based on the chance-corrected concordance of Physician  
36 Certified Verbal Autopsy (PCVA) versus medical certification by the Population Health  
37 Metrics Research Consortium.<sup>39</sup>

38 Age-Sex Coverage:

39 The number of deaths estimated in the GBD mortality envelope for the ages and sexes  
40 in the study for the country and year divided by the number of deaths estimated in the  
41 GBD mortality envelope for the country and year. Studies that only cover children under  
42 age 5 or maternal mortality, for example, will be highly discounted by this multiplier.



1 In the case of verbal autopsy, all garbage codes are considered ill-defined, as redistribution for verbal  
2 autopsy is highly imprecise. Causes such as “Injuries” or “Cancer” will also be included in major garbage  
3 percentage, as this percentage includes use of highly aggregated causes.  
4

5 Once percent well-certified is calculated for each location-year of vital registration and each verbal  
6 autopsy study-year, we then combine these into one measurement for each five-year time interval and  
7 the full time series 1980–2016. For each five-year time interval, we take the maximum percent well-  
8 certified. Then for 1980–2016, we take the average of the maximum percentages well-certified for the  
9 seven five-year time intervals, including any five-year time interval where no data were available as a  
10 zero.  
11

12 Once these values are calculated, we assign stars as follows:

13 5 stars: 85%–100% well-certified

14 4 stars: 65%–84% well-certified

15 3 stars: 35%–64% well-certified

16 2 stars: 10%–34% well-certified

17 1 star: >0%–9% well-certified

18 0 stars: No vital registration or verbal autopsy data available from 1980–2016  
19

20 The GBD 2016 causes of death paper<sup>38</sup> provides more detail on the percent well-certified, stars, data  
21 sources, and underlying values for percent well-certified used for each country and time interval.  
22

## 1 Section 7: References

- 2 1 Rajaratnam JK, Tran LN, Lopez AD, Murray CJL. Measuring Under-Five Mortality: Validation of New  
3 Low-Cost Methods. *PLOS Med* 2010; **7**: e1000253.
- 4 2 Wang H, Dwyer-Lindgren L, Lofgren KT, *et al.* Age-specific and sex-specific mortality in 187 countries,  
5 1970–2010: a systematic analysis for the Global Burden of Disease Study 2010. *The Lancet* 2012; **380**:  
6 2071–94.
- 7 3 Hill K. Estimating census and death registration completeness. *Asian Pac Popul Forum* 1987; **1**: 8–13,  
8 23–4.
- 9 4 Wang H, Liddell CA, Coates MM, *et al.* Global, regional, and national levels of neonatal, infant, and  
10 under-5 mortality during 1990–2013: a systematic analysis for the Global Burden of Disease Study  
11 2013. *The Lancet* 2014; **384**: 957–79.
- 12 5 Murray CJ, Ezzati M, Flaxman AD, *et al.* GBD 2010: design, definitions, and metrics. *The Lancet* 2012;  
13 **380**: 2063–6.
- 14 6 Wang H, Bhutta ZA, Coates MM, *et al.* Global, regional, national, and selected subnational levels of  
15 stillbirths, neonatal, infant, and under-5 mortality, 1980–2015: a systematic analysis for the Global  
16 Burden of Disease Study 2015. *The Lancet* 2016; **388**: 1725–74.
- 17 7 Gelman A, Carlin JB, Stern HS, Rubin DB. Bayesian Data Analysis, Second Edition, 2 edition. Boca Raton,  
18 Fla: Chapman and Hall/CRC, 2003.
- 19 8 Gompertz B. On one Uniform Law of Mortality from Birth to extreme Old Age, and on the Law of  
20 Sickness. *J Inst Actuar Assur Mag* 1871; **16**: 329–44.
- 21 9 The UN Inter-agency Group for Child Mortality Estimation. Child Mortality Estimates.  
22 <http://www.childmortality.org/> (accessed May 20, 2017).
- 23 10 Bradshaw D, Dorrington R. Child mortality in South Africa - we have lost touch. *S Afr Med J* 2007;  
24 **97**: 582.
- 25 11 Kerber KJ, Lawn JE, Johnson LF, *et al.* South African child deaths 1990-2011: have HIV services  
26 reversed the trend enough to meet Millennium Development Goal 4? *AIDS Lond Engl* 2013; **27**: 2637–  
27 48.
- 28 12 Kim H-Y, Kasonde P, Mwiya M, *et al.* Pregnancy loss and role of infant HIV status on perinatal  
29 mortality among HIV-infected women. *BMC Pediatr* 2012; **12**: 138.
- 30 13 Brocklehurst P, French R. The association between maternal HIV infection and perinatal  
31 outcome: a systematic review of the literature and meta-analysis. *Br J Obstet Gynaecol* 1998; **105**:  
32 836–48.
- 33 14 Blencowe H, Cousens S, Jassir FB, *et al.* National, regional, and worldwide estimates of stillbirth  
34 rates in 2015, with trends from 2000: a systematic analysis. *Lancet Glob Health* 2016; **4**: e98–108.

- 1 15 Bennett NG, Horiuchi S. Estimating the Completeness of Death Registration in a Closed  
2 Population. *Popul Index* 1981; **47**: 207–21.
- 3 16 Brass W, Coale AJ. Methods of Analysis and Estimation. In: *Mathematical Demography*. Springer  
4 Berlin Heidelberg, 1977: 307–13.
- 5 17 Preston SH. The changing relation between mortality and level of economic development. *Popul  
6 Stud* 1975; **29**: 231–48.
- 7 18 Preston S, Coale AJ, Trussell J, Weinstein M. Estimating the Completeness of Reporting of Adult  
8 Deaths in Populations That Are Approximately Stable. *Popul Index* 1980; **46**: 179–202.
- 9 19 Murray CJL, Rajaratnam JK, Marcus J, Laakso T, Lopez AD. What Can We Conclude from Death  
10 Registration? Improved Methods for Evaluating Completeness. *PLOS Med* 2010; **7**: e1000262.
- 11 20 Obermeyer Z, Rajaratnam JK, Park CH, *et al*. Measuring Adult Mortality Using Sibling Survival: A  
12 New Analytical Method and New Results for 44 Countries, 1974–2006. *PLOS Med* 2010; **7**: e1000260.
- 13 21 Gakidou E, King G. Death by survey: estimating adult mortality without selection bias from  
14 sibling survival data. *Demography* 2006; **43**: 569–85.
- 15 22 Masquelier B. Adult mortality from sibling survival data: a reappraisal of selection biases.  
16 *Demography* 2013; **50**: 207–28.
- 17 23 Rogers RG, Crimmins EM, editors. *International Handbook of Adult Mortality*.  
18 <http://www.springer.com/gp/book/9789048199952> (accessed May 20, 2017).
- 19 24 Lozano R, Wang H, Foreman KJ, *et al*. Progress towards Millennium Development Goals 4 and 5  
20 on maternal and child mortality: an updated systematic analysis. *The Lancet* 2011; **378**: 1139–65.
- 21 25 Schnuelle P, Lorenz D, Trede M, Van Der Woude FJ. Impact of renal cadaveric transplantation on  
22 survival in end-stage renal failure: evidence for reduced mortality risk compared with hemodialysis  
23 during long-term follow-up. *J Am Soc Nephrol JASN* 1998; **9**: 2135–41.
- 24 26 Murray CJL, Ferguson BD, Lopez AD, Guillot M, Salomon JA, Ahmad O. Modified Logit Life Table  
25 System: Principles, Empirical Validation, and Application. *Popul Stud* 2003; **57**: 165–82.
- 26 27 Shkolnikov V, Barbieri M, Wilmoth J. Human Mortality Database. <http://www.mortality.org/>  
27 (accessed May 20, 2017).
- 28 28 Thatcher AR. The long-term pattern of adult mortality and the highest attained age. *J R Stat Soc  
29 Ser A Stat Soc* 1999; **162**: 5–43.
- 30 29 King G, Tomz M, Wittenberg J. Making the Most of Statistical Analyses: Improving Interpretation  
31 and Presentation. *Am J Polit Sci* 2000; **44**: 341–55.
- 32 30 Global Burden of Disease Causes of Death Collaboration. Global, regional, and national age-sex  
33 specific mortality for 264 causes of death, 1980–2016: a systematic analysis for the Global Burden of  
34 Disease Study 2016. *Lancet Rev* 2017.

- 1 31 Wang H, Wolock TM, Carter A, *et al.* Estimates of global, regional, and national incidence,  
2 prevalence, and mortality of HIV, 1980–2015: the Global Burden of Disease Study 2015. *Lancet HIV*  
3 2016; **3**: e361–87.
- 4 32 Wang H, Naghavi M, Allen C, *et al.* Global, regional, and national life expectancy, all-cause  
5 mortality, and cause-specific mortality for 249 causes of death, 1980–2015: a systematic analysis for  
6 the Global Burden of Disease Study 2015. *The Lancet* 2016; **388**: 1459–544.
- 7 33 UCDP/PRIO Armed Conflict Dataset Codebook. Uppsala Conflict Data Program (UCDP); Centre  
8 for the Study of Civil Wars, International Peace Research Institute, Oslo (PRIO), 2013.
- 9 34 Inc GI, Berger DS. Cholera: Global Status: 2017 edition. GIDEON Informatics Inc, 2017.
- 10 35 Inc GI, Berger DS. Bacterial Meningitis: Global Status: 2017 edition. GIDEON Informatics Inc,  
11 2017.
- 12 36 Ahmad OB, Boschi-Pinto C, Lopez AD, Murray CJL, Lozano R, Inoue M. Age standardization of  
13 rates: A new WHO standard. Geneva, Switzerland: World Health Organization, 2001  
14 <http://www.who.int/healthinfo/paper31.pdf> (accessed May 20, 2017).
- 15 37 Functions Reference Manual. 2015. <http://www.stata.com/manuals13/rcorrelate.pdf> (accessed  
16 May 17, 2017).
- 17 38 Nagavi M. Global, regional, and national cause-specific mortality for 242 causes of death, 1980-  
18 2016: a systematic analysis for the Global Burden of Disease Study 2016. *The Lancet* 2017; published  
19 online Sept.
- 20 39 Lozano R, Lopez AD, Atkinson C, Naghavi M, Flaxman AD, Murray CJ. Performance of physician-  
21 certified verbal autopsies: multisite validation study using clinical diagnostic gold standards. *Popul*  
22 *Health Metr* 2011; **9**: 32.
- 23
- 24

1 **Section 8. Figures and Tables**

2

Appendix Figure 1. Analytical flowchart for the estimation of all-cause mortality by age and sex and HIV/AIDS incidence, prevalence, and mortality for GBD 2016.

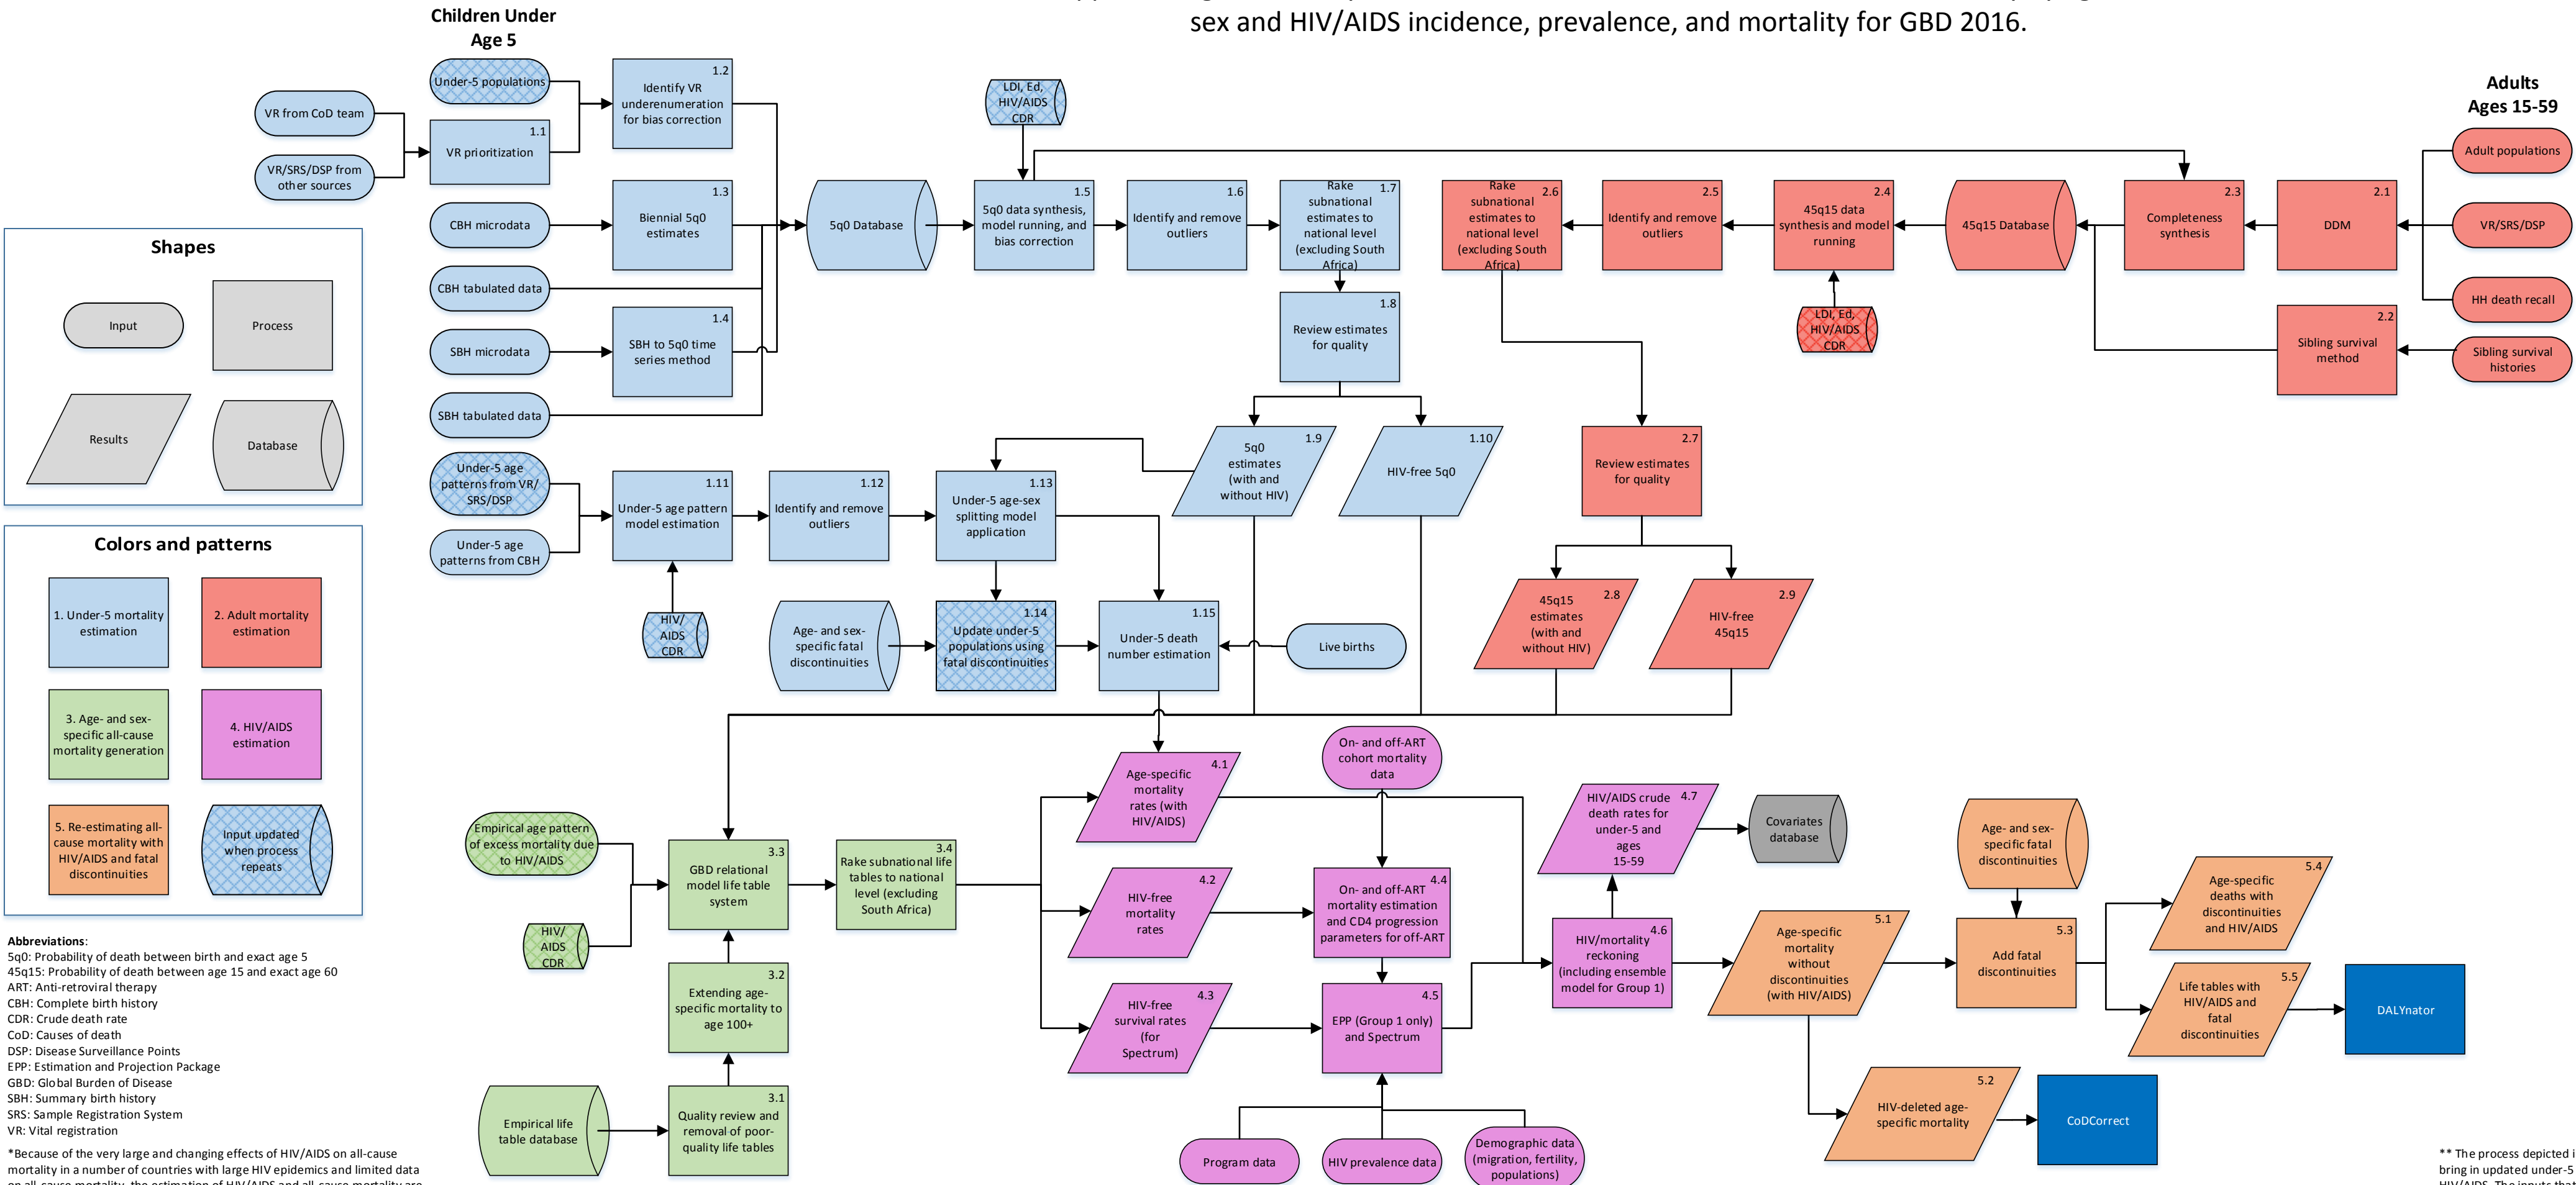

Appendix Figure 2: Sibling history correction for zero-survivorship, by sex

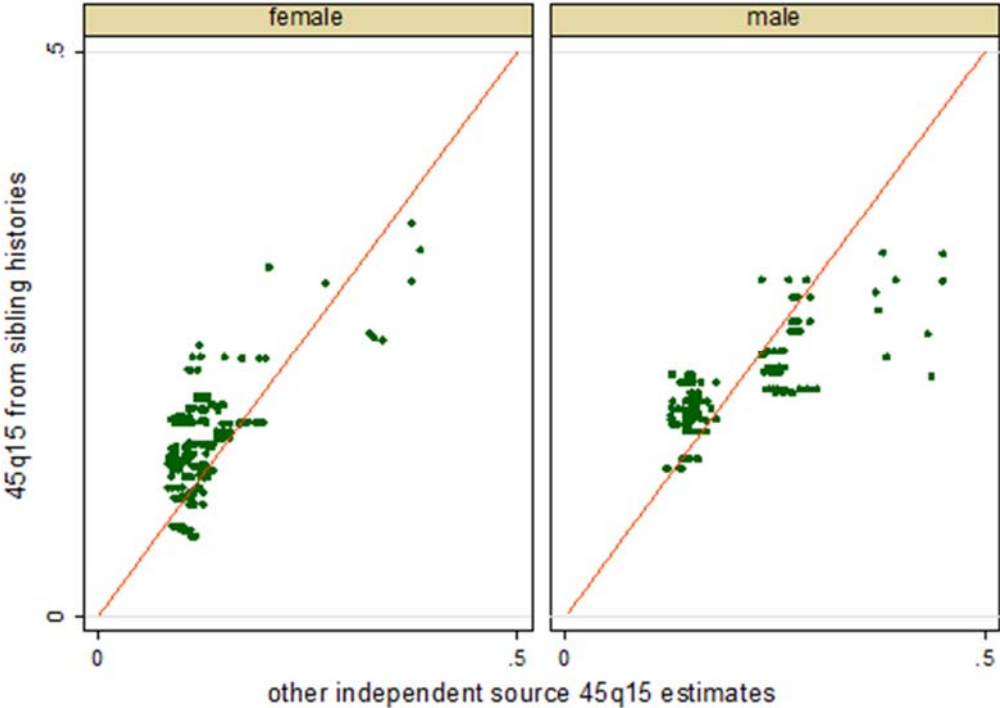

Appendix Figure 3: Comparison of life expectancy at birth by location in GBD 2015 vs GBD 2016

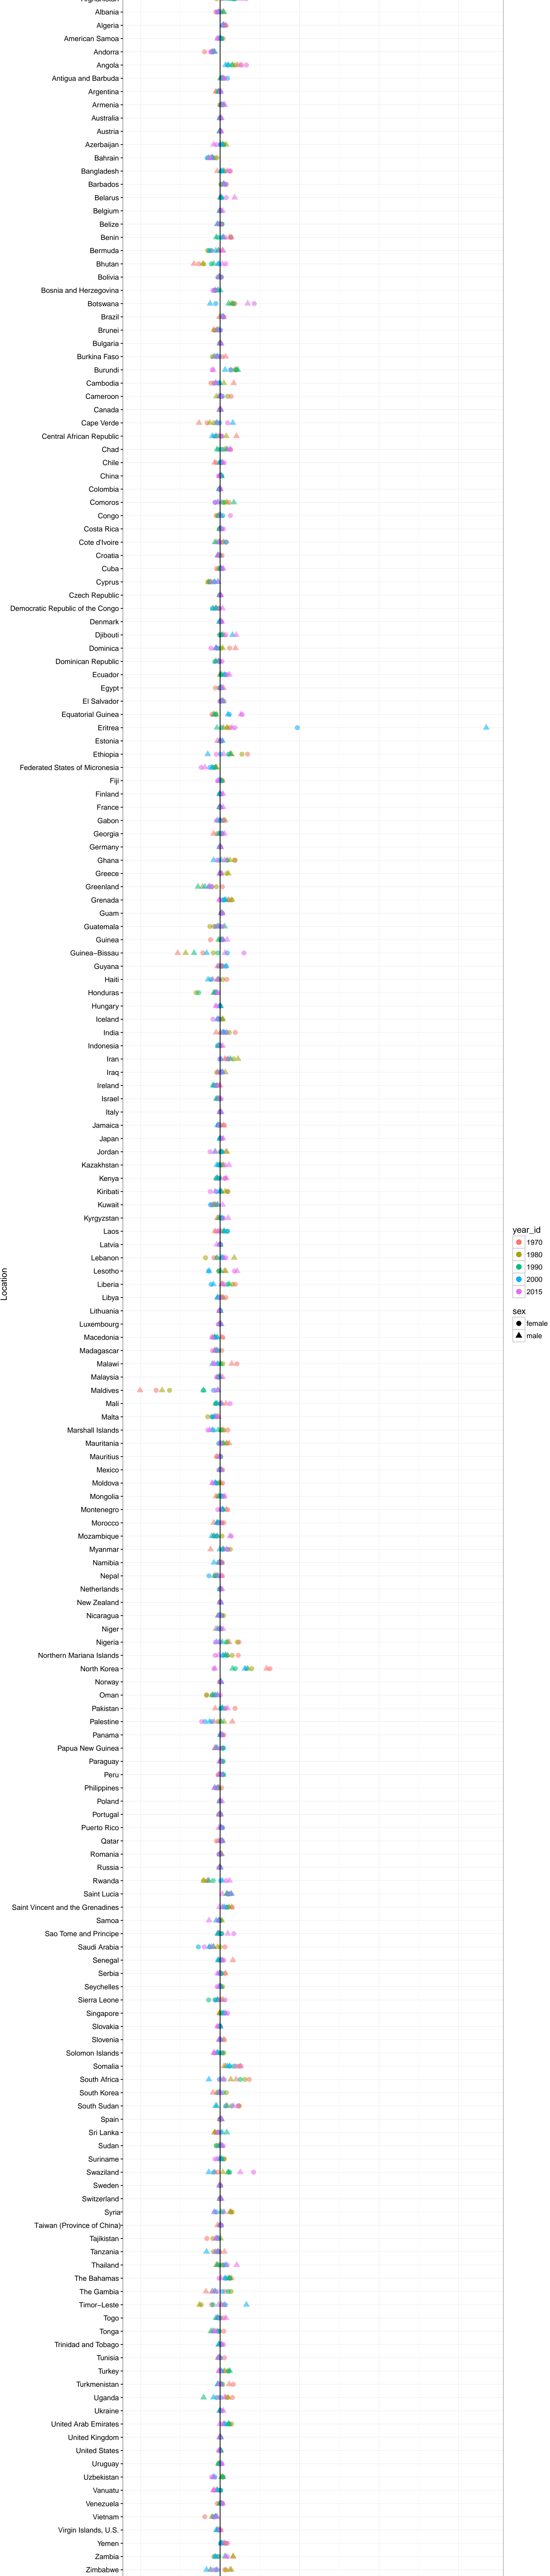



Appendix Figure 4. Comparison of estimates of under-5 mortality from GBD 2016 and IGME 2015 for all countries included in both analyses, 2015

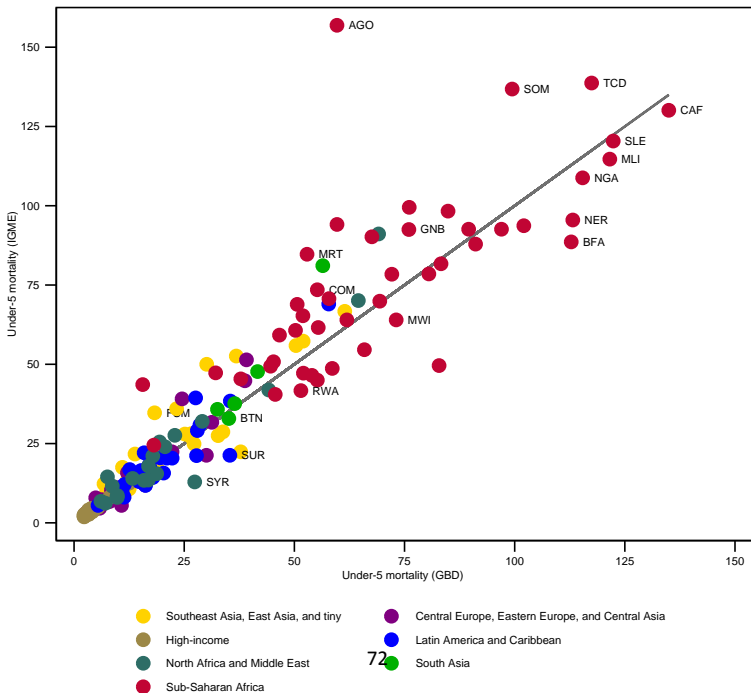

Appendix Figure 5. Ratio of stillbirth rates to neonatal mortality rates by GBD super region, 1970–2016

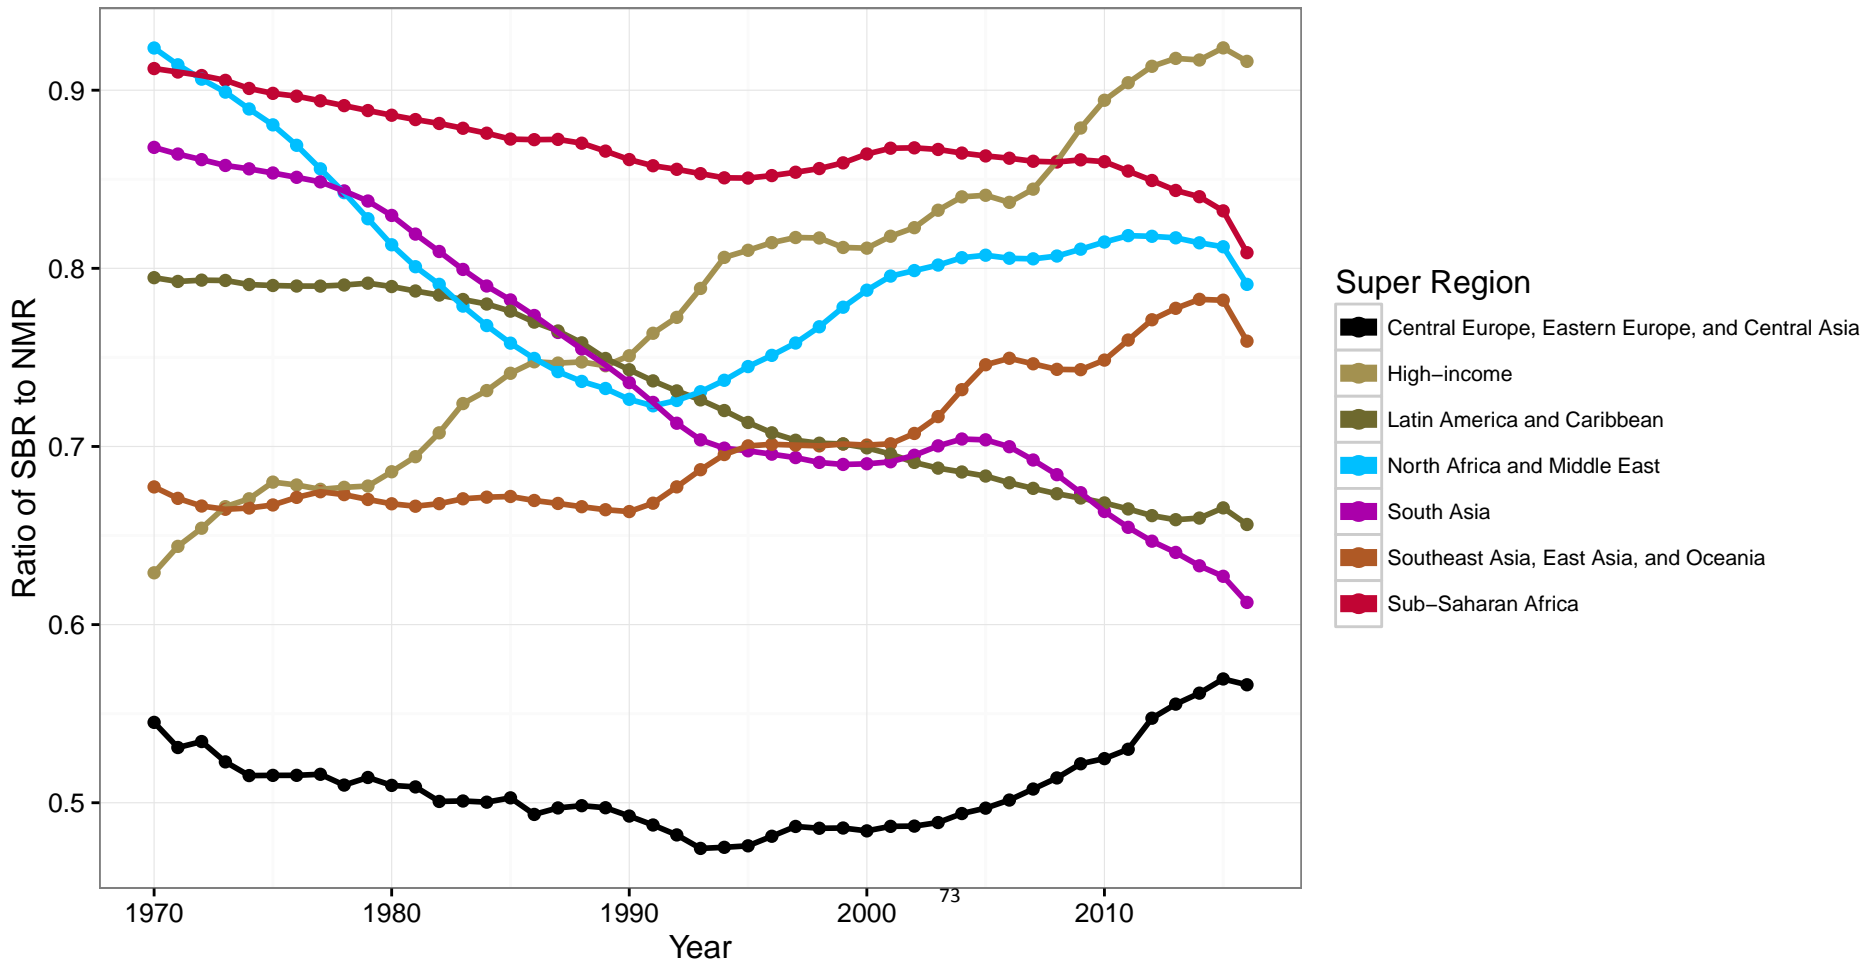

Appendix Figure 6. Comparison of stillbirth rates from GBD 2016 and SEIG for all countries included in both analyses, 2015

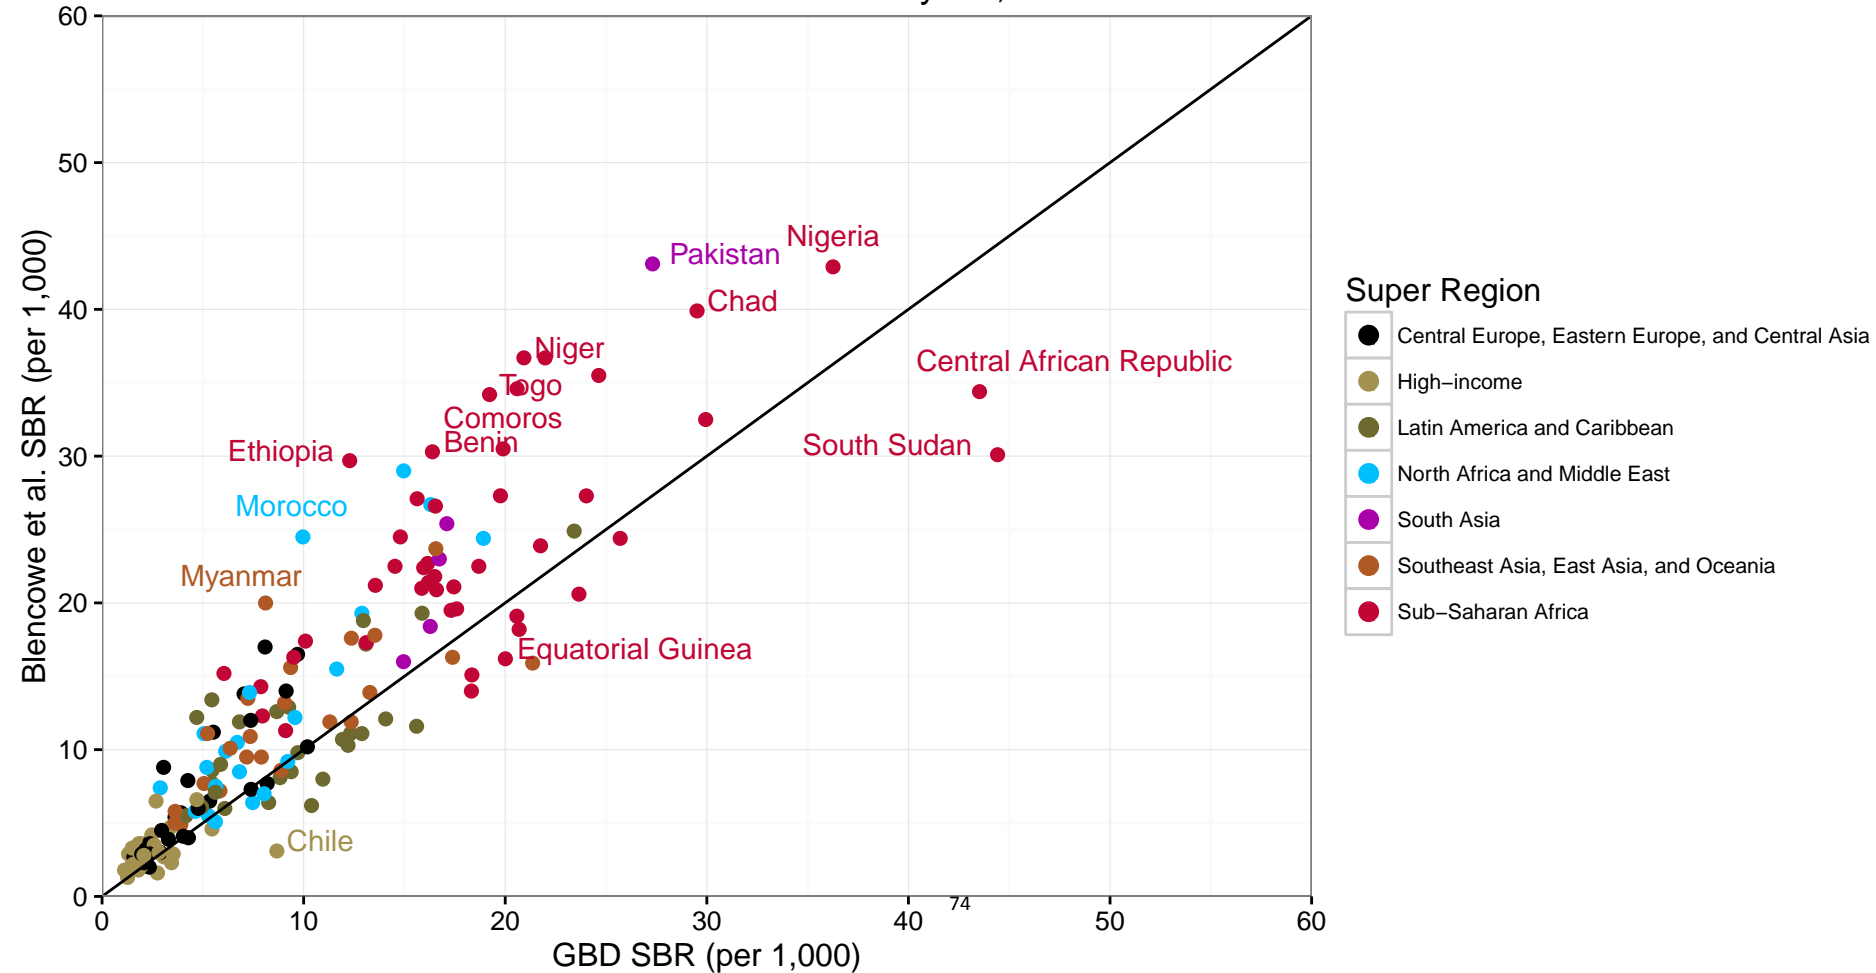

Appendix Figure 7. Ratio of estimated number of live births by location between GBD 2016 and UN Population Division, 1970, 1980, 1990, 2000, 2016

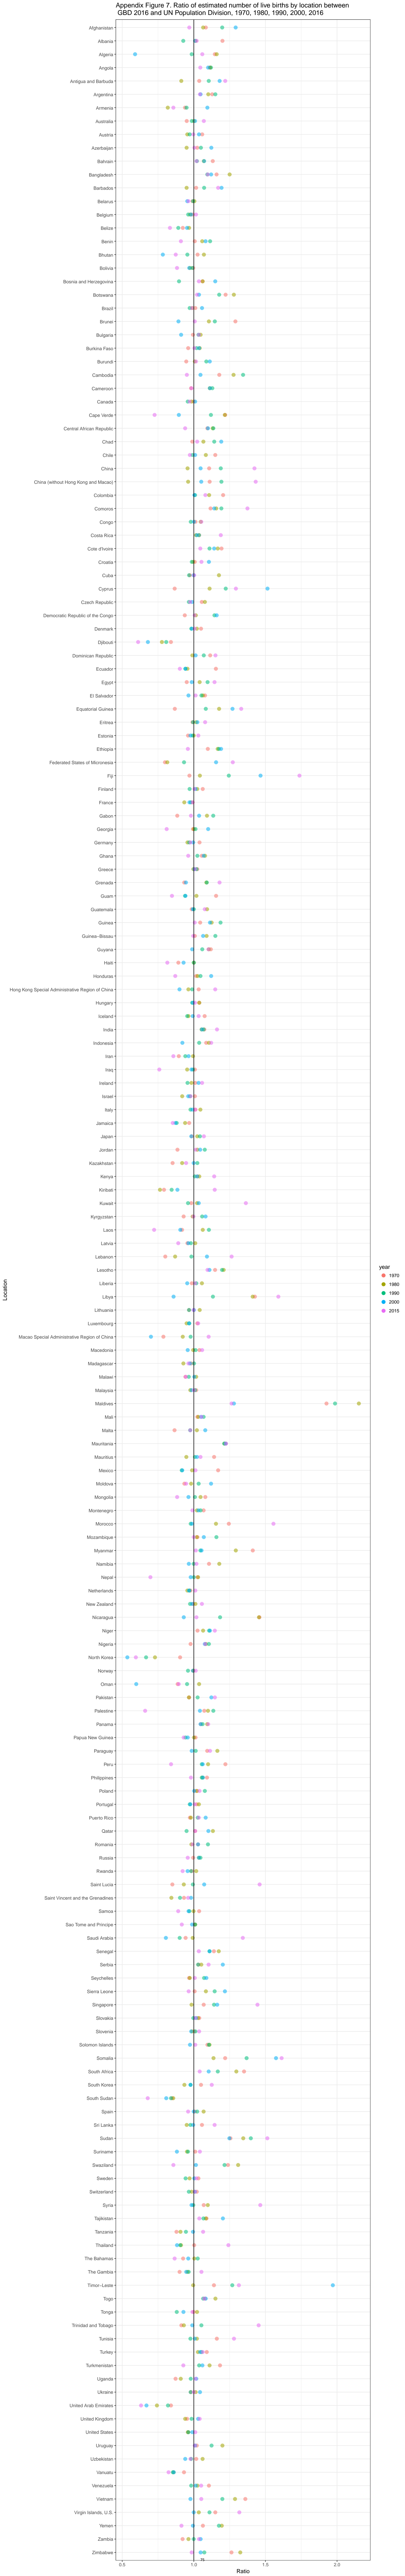

Appendix figure 8. Estimated completeness of death registration, 1970 to 1989

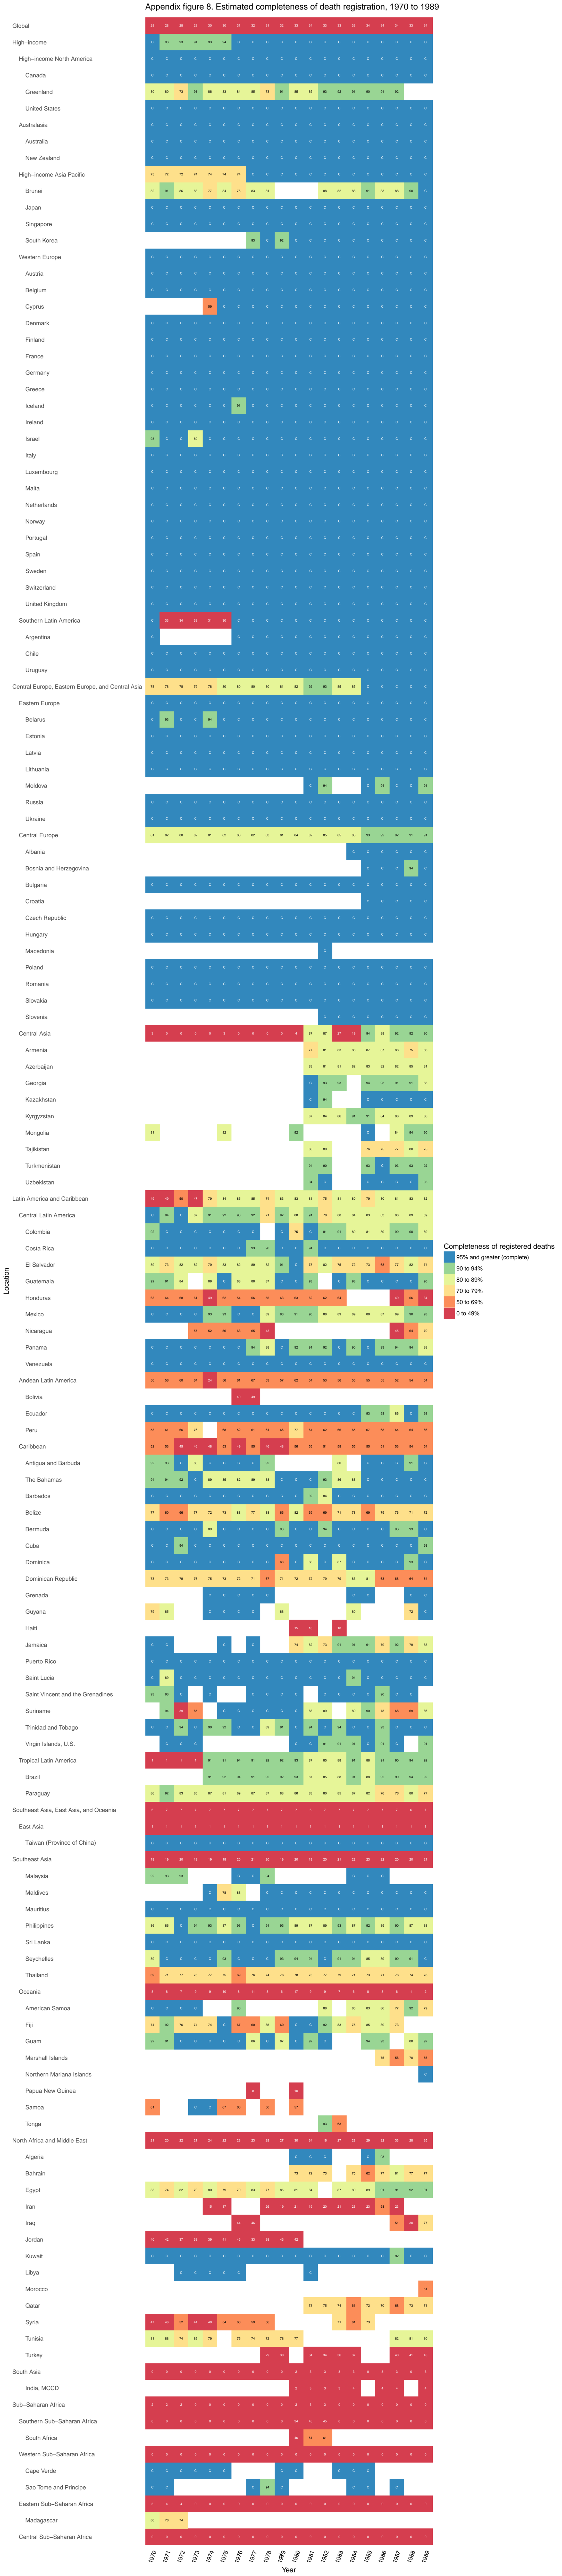

| Appendix Table 1. GATHER checklist of information that should be included in reports of global health estimates, with description of compliance and location of information for GBD 2016. Global, regional, and national life expectancy and all-cause mortality, 1980-2016: a systematic review for the Global Burden of Disease Study 2016. |                                                                                                                                                                                                                                                                                                                                               |                                                                                                                                                        |                                                                                        |
|-----------------------------------------------------------------------------------------------------------------------------------------------------------------------------------------------------------------------------------------------------------------------------------------------------------------------------------------------|-----------------------------------------------------------------------------------------------------------------------------------------------------------------------------------------------------------------------------------------------------------------------------------------------------------------------------------------------|--------------------------------------------------------------------------------------------------------------------------------------------------------|----------------------------------------------------------------------------------------|
| #                                                                                                                                                                                                                                                                                                                                             | GATHER checklist item                                                                                                                                                                                                                                                                                                                         | Description of compliance                                                                                                                              | Reference                                                                              |
| <b>Objectives and funding</b>                                                                                                                                                                                                                                                                                                                 |                                                                                                                                                                                                                                                                                                                                               |                                                                                                                                                        |                                                                                        |
| 1                                                                                                                                                                                                                                                                                                                                             | Define the indicators, populations, and time periods for which estimates were made.                                                                                                                                                                                                                                                           | Narrative provided in paper and methods appendix describing indicators, definitions, and populations                                                   | Main text (Methods—Overview, Geographic units and time periods) and methods appendix   |
| 2                                                                                                                                                                                                                                                                                                                                             | List the funding sources for the work.                                                                                                                                                                                                                                                                                                        | Funding sources listed in paper                                                                                                                        | Summary (Funding)                                                                      |
| <b>Data Inputs</b>                                                                                                                                                                                                                                                                                                                            |                                                                                                                                                                                                                                                                                                                                               |                                                                                                                                                        |                                                                                        |
| <i>For all data inputs from multiple sources that are synthesized as part of the study:</i>                                                                                                                                                                                                                                                   |                                                                                                                                                                                                                                                                                                                                               |                                                                                                                                                        |                                                                                        |
| 3                                                                                                                                                                                                                                                                                                                                             | Describe how the data were identified and how the data were accessed.                                                                                                                                                                                                                                                                         | Narrative description of data seeking methods provided                                                                                                 | Main text (Methods) and methods appendix                                               |
| 4                                                                                                                                                                                                                                                                                                                                             | Specify the inclusion and exclusion criteria. Identify all ad-hoc exclusions.                                                                                                                                                                                                                                                                 | Narrative about inclusion and exclusion criteria by data type provided                                                                                 | Main text (Methods) and methods appendix                                               |
| 5                                                                                                                                                                                                                                                                                                                                             | Provide information on all included data sources and their main characteristics. For each data source used, report reference information or contact name/institution, population represented, data collection method, year(s) of data collection, sex and age range, diagnostic criteria or measurement method, and sample size, as relevant. | An interactive, online data source tool that provides metadata for data sources by component, geography, cause, risk, or impairment has been developed | Online data citation tools                                                             |
| 6                                                                                                                                                                                                                                                                                                                                             | Identify and describe any categories of input data that have potentially important biases (e.g., based on characteristics listed in item 5).                                                                                                                                                                                                  | Summary of known biases by cause included in methods appendix                                                                                          | Methods appendix                                                                       |
| <i>For data inputs that contribute to the analysis but were not synthesized as part of the study:</i>                                                                                                                                                                                                                                         |                                                                                                                                                                                                                                                                                                                                               |                                                                                                                                                        |                                                                                        |
| 7                                                                                                                                                                                                                                                                                                                                             | Describe and give sources for any other data inputs.                                                                                                                                                                                                                                                                                          | Included in online data source tool                                                                                                                    | Online data citation tools                                                             |
| <i>For all data inputs:</i>                                                                                                                                                                                                                                                                                                                   |                                                                                                                                                                                                                                                                                                                                               |                                                                                                                                                        |                                                                                        |
| 8                                                                                                                                                                                                                                                                                                                                             | Provide all data inputs in a file format from which data can be efficiently extracted (e.g., a spreadsheet as opposed to a PDF), including all relevant meta-data listed in item 5. For any data inputs that cannot be                                                                                                                        | Downloads of input data available through online tools, including data visualization                                                                   | Online data visualization tools, data query tools, and the Global Health Data Exchange |

|                               |                                                                                                                                                                                                                                                                         |                                                                                                                                                                                |                                                                                                                                      |
|-------------------------------|-------------------------------------------------------------------------------------------------------------------------------------------------------------------------------------------------------------------------------------------------------------------------|--------------------------------------------------------------------------------------------------------------------------------------------------------------------------------|--------------------------------------------------------------------------------------------------------------------------------------|
|                               | shared due to ethical or legal reasons, such as third-party ownership, provide a contact name or the name of the institution that retains the right to the data.                                                                                                        | tools and data query tools; input data not available in tools will be made available upon request                                                                              |                                                                                                                                      |
| <b>Data analysis</b>          |                                                                                                                                                                                                                                                                         |                                                                                                                                                                                |                                                                                                                                      |
| 9                             | Provide a conceptual overview of the data analysis method. A diagram may be helpful.                                                                                                                                                                                    | Flow diagrams of the overall methodological processes, as well as cause-specific modelling processes, have been provided                                                       | Main text (Methods, figures 1) and methods appendix                                                                                  |
| 10                            | Provide a detailed description of all steps of the analysis, including mathematical formulae. This description should cover, as relevant, data cleaning, data pre-processing, data adjustments and weighting of data sources, and mathematical or statistical model(s). | Flow diagrams and corresponding methodological write-ups for each cause, as well as the demographics and causes of death databases and modelling processes, have been provided | Main text (Methods, figures 1) and methods appendix                                                                                  |
| 11                            | Describe how candidate models were evaluated and how the final model(s) were selected.                                                                                                                                                                                  | Provided in the methodological write-ups                                                                                                                                       | Methods appendix                                                                                                                     |
| 12                            | Provide the results of an evaluation of model performance, if done, as well as the results of any relevant sensitivity analysis.                                                                                                                                        | Provided in the methodological write-ups                                                                                                                                       | Methods appendix                                                                                                                     |
| 13                            | Describe methods for calculating uncertainty of the estimates. State which sources of uncertainty were, and were not, accounted for in the uncertainty analysis.                                                                                                        | Provided in the methodological write-ups                                                                                                                                       | Methods appendix                                                                                                                     |
| 14                            | State how analytic or statistical source code used to generate estimates can be accessed.                                                                                                                                                                               | Access statement provided                                                                                                                                                      | Code is provided in an online repository                                                                                             |
| <b>Results and Discussion</b> |                                                                                                                                                                                                                                                                         |                                                                                                                                                                                |                                                                                                                                      |
| 15                            | Provide published estimates in a file format from which data can be efficiently extracted.                                                                                                                                                                              | GBD 2016 results are available through online data visualization tools, the Global Health Data Exchange, and the online data query tool                                        | Main text, methods appendix, and online data tools (data visualization tools, data query tools, and the Global Health Data Exchange) |
| 16                            | Report a quantitative measure of the uncertainty of the estimates (e.g. uncertainty intervals).                                                                                                                                                                         | Uncertainty intervals are provided with all results                                                                                                                            | Main text, methods appendix, and online data tools (data visualization tools,                                                        |

|    |                                                                                                                                                          |                                                                                                                                           |                                                         |
|----|----------------------------------------------------------------------------------------------------------------------------------------------------------|-------------------------------------------------------------------------------------------------------------------------------------------|---------------------------------------------------------|
|    |                                                                                                                                                          |                                                                                                                                           | data query tools, and the Global Health Data Exchange)  |
| 17 | Interpret results in light of existing evidence. If updating a previous set of estimates, describe the reasons for changes in estimates.                 | Discussion of methodological changes between GBD rounds provided in the narrative of the Article and methods appendix                     | Main text (Methods and Discussion) and methods appendix |
| 18 | Discuss limitations of the estimates. Include a discussion of any modelling assumptions or data limitations that affect interpretation of the estimates. | Discussion of limitations provided in the narrative of the main paper, as well as in the methodological write-ups in the methods appendix | Main text (Limitations) and methods appendix            |



**Appendix Table 2. Distribution of empirical life tables by GBD super-region, 1950-2016**

| <b>Super Region</b>                              | <b>Number of Life Tables</b> |
|--------------------------------------------------|------------------------------|
| Central Europe, Eastern Europe, and Central Asia | 1599                         |
| High-income                                      | 9516                         |
| Latin America and Caribbean                      | 3208                         |
| North Africa and Middle East                     | 83                           |
| South Asia                                       | 196                          |
| Southeast Asia, East Asia, and Oceania           | 617                          |
| Sub-Saharan Africa                               | 2                            |
| Total                                            | 15221                        |

**Appendix Table 3. GBD 2016 location hierarchy with levels**

|                                                  | Level |
|--------------------------------------------------|-------|
| Global                                           | 0     |
| Southeast Asia, East Asia, and Oceania           | 1     |
| East Asia                                        | 2     |
| China                                            | 3     |
| Anhui                                            | 4     |
| Beijing                                          | 4     |
| Chongqing                                        | 4     |
| Fujian                                           | 4     |
| Gansu                                            | 4     |
| Guangdong                                        | 4     |
| Guangxi                                          | 4     |
| Guizhou                                          | 4     |
| Hainan                                           | 4     |
| Hebei                                            | 4     |
| Heilongjiang                                     | 4     |
| Henan                                            | 4     |
| Hong Kong Special Administrative Region of China | 4     |
| Hubei                                            | 4     |
| Hunan                                            | 4     |
| Inner Mongolia                                   | 4     |
| Jiangsu                                          | 4     |
| Jiangxi                                          | 4     |
| Jilin                                            | 4     |
| Liaoning                                         | 4     |
| Macao Special Administrative Region of China     | 4     |
| Ningxia                                          | 4     |
| Qinghai                                          | 4     |
| Shaanxi                                          | 4     |
| Shandong                                         | 4     |
| Shanghai                                         | 4     |
| Shanxi                                           | 4     |
| Sichuan                                          | 4     |
| Tianjin                                          | 4     |
| Tibet                                            | 4     |
| Xinjiang                                         | 4     |
| Yunnan                                           | 4     |
| Zhejiang                                         | 4     |
| North Korea                                      | 3     |
| Taiwan (Province of China)                       | 3     |
| Southeast Asia                                   | 2     |
| Cambodia                                         | 3     |
| Indonesia                                        | 3     |
| Aceh                                             | 4     |
| Bali                                             | 4     |

**Appendix Table 3. GBD 2016 location hierarchy with levels**

|                                          | Level |
|------------------------------------------|-------|
| Bangka-Belitung Islands                  | 4     |
| Banten                                   | 4     |
| Bengkulu                                 | 4     |
| Gorontalo                                | 4     |
| Jakarta                                  | 4     |
| Jambi                                    | 4     |
| Jawa Barat (West Java)                   | 4     |
| Jawa Tengah (Central Java)               | 4     |
| Jawa Timur (East Java)                   | 4     |
| Kalimantan Barat (West Kalimantan)       | 4     |
| Kalimantan Selatan (South Kalimantan)    | 4     |
| Kalimantan Tengah (Central Kalimantan)   | 4     |
| Kalimantan Timur (East Kalimantan)       | 4     |
| Kalimantan Utara (North Kalimantan)      | 4     |
| Kepulauan Riau (Riau Islands)            | 4     |
| Lampung                                  | 4     |
| Maluku                                   | 4     |
| Maluku Utara (North Maluku)              | 4     |
| Nusa Tenggara Barat (West Nusa Tenggara) | 4     |
| Nusa Tenggara Timur (East Nusa Tenggara) | 4     |
| Papua                                    | 4     |
| Papua Barat (West Papua)                 | 4     |
| Riau                                     | 4     |
| Sulawesi Barat (West Sulawesi)           | 4     |
| Sulawesi Selatan (South Sulawesi)        | 4     |
| Sulawesi Tengah (Central Sulawesi)       | 4     |
| Sulawesi Tenggara (Southeast Sulawesi)   | 4     |
| Sulawesi Utara (North Sulawesi)          | 4     |
| Sumatera Barat (West Sumatra)            | 4     |
| Sumatera Selatan (South Sumatra)         | 4     |
| Sumatera Utara (North Sumatra)           | 4     |
| Yogyakarta                               | 4     |
| Laos                                     | 3     |
| Malaysia                                 | 3     |
| Maldives                                 | 3     |
| Mauritius                                | 3     |
| Myanmar                                  | 3     |
| Philippines                              | 3     |
| Sri Lanka                                | 3     |
| Seychelles                               | 3     |
| Thailand                                 | 3     |
| Timor-Leste                              | 3     |
| Vietnam                                  | 3     |
| Oceania                                  | 2     |

**Appendix Table 3. GBD 2016 location hierarchy with levels**

|                                                  | Level |
|--------------------------------------------------|-------|
| Federated States of Micronesia                   | 3     |
| Fiji                                             | 3     |
| Kiribati                                         | 3     |
| Marshall Islands                                 | 3     |
| Papua New Guinea                                 | 3     |
| Samoa                                            | 3     |
| Solomon Islands                                  | 3     |
| Tonga                                            | 3     |
| Vanuatu                                          | 3     |
| Central Europe, Eastern Europe, and Central Asia | 1     |
| Central Asia                                     | 2     |
| Armenia                                          | 3     |
| Azerbaijan                                       | 3     |
| Georgia                                          | 3     |
| Kazakhstan                                       | 3     |
| Kyrgyzstan                                       | 3     |
| Mongolia                                         | 3     |
| Tajikistan                                       | 3     |
| Turkmenistan                                     | 3     |
| Uzbekistan                                       | 3     |
| Central Europe                                   | 2     |
| Albania                                          | 3     |
| Bosnia and Herzegovina                           | 3     |
| Bulgaria                                         | 3     |
| Croatia                                          | 3     |
| Czech Republic                                   | 3     |
| Hungary                                          | 3     |
| Macedonia                                        | 3     |
| Montenegro                                       | 3     |
| Poland                                           | 3     |
| Romania                                          | 3     |
| Serbia                                           | 3     |
| Slovakia                                         | 3     |
| Slovenia                                         | 3     |
| Eastern Europe                                   | 2     |
| Belarus                                          | 3     |
| Estonia                                          | 3     |
| Latvia                                           | 3     |
| Lithuania                                        | 3     |
| Moldova                                          | 3     |
| Russia                                           | 3     |
| Ukraine                                          | 3     |
| High-income                                      | 1     |
| High-income Asia Pacific                         | 2     |

**Appendix Table 3. GBD 2016 location hierarchy with levels**

|           | Level |
|-----------|-------|
| Brunei    | 3     |
| Japan     | 3     |
| Aichi     | 4     |
| Akita     | 4     |
| Aomori    | 4     |
| Chiba     | 4     |
| Ehime     | 4     |
| Fukui     | 4     |
| Fukuoka   | 4     |
| Fukushima | 4     |
| Gifu      | 4     |
| Gunma     | 4     |
| Hiroshima | 4     |
| Hokkaido  | 4     |
| Hyogo     | 4     |
| Ibaraki   | 4     |
| Ishikawa  | 4     |
| Iwate     | 4     |
| Kagawa    | 4     |
| Kagoshima | 4     |
| Kanagawa  | 4     |
| Kochi     | 4     |
| Kumamoto  | 4     |
| Kyoto     | 4     |
| Mie       | 4     |
| Miyagi    | 4     |
| Miyazaki  | 4     |
| Nagano    | 4     |
| Nagasaki  | 4     |
| Nara      | 4     |
| Niigata   | 4     |
| Oita      | 4     |
| Okayama   | 4     |
| Okinawa   | 4     |
| Osaka     | 4     |
| Saga      | 4     |
| Saitama   | 4     |
| Shiga     | 4     |
| Shimane   | 4     |
| Shizuoka  | 4     |
| Tochigi   | 4     |
| Tokushima | 4     |
| Tokyo     | 4     |
| Tottori   | 4     |

**Appendix Table 3. GBD 2016 location hierarchy with levels**

|                         | Level |
|-------------------------|-------|
| Toyama                  | 4     |
| Wakayama                | 4     |
| Yamagata                | 4     |
| Yamaguchi               | 4     |
| Yamanashi               | 4     |
| South Korea             | 3     |
| Singapore               | 3     |
| Australasia             | 2     |
| Australia               | 3     |
| New Zealand             | 3     |
| Western Europe          | 2     |
| Andorra                 | 3     |
| Austria                 | 3     |
| Belgium                 | 3     |
| Cyprus                  | 3     |
| Denmark                 | 3     |
| Finland                 | 3     |
| France                  | 3     |
| Germany                 | 3     |
| Greece                  | 3     |
| Greenland               | 3     |
| Iceland                 | 3     |
| Ireland                 | 3     |
| Israel                  | 3     |
| Italy                   | 3     |
| Luxembourg              | 3     |
| Malta                   | 3     |
| Netherlands             | 3     |
| Norway                  | 3     |
| Portugal                | 3     |
| Spain                   | 3     |
| Sweden                  | 3     |
| Stockholm               | 4     |
| Sweden except Stockholm | 4     |
| Switzerland             | 3     |
| United Kingdom          | 3     |
| England                 | 4     |
| East Midlands           | 5     |
| Derby                   | 6     |
| Derbyshire              | 6     |
| Leicester               | 6     |
| Leicestershire          | 6     |
| Lincolnshire            | 6     |
| Northamptonshire        | 6     |

**Appendix Table 3. GBD 2016 location hierarchy with levels**

|                        | Level |
|------------------------|-------|
| Nottingham             | 6     |
| Nottinghamshire        | 6     |
| Rutland                | 6     |
| East of England        | 5     |
| Bedford                | 6     |
| Cambridgeshire         | 6     |
| Central Bedfordshire   | 6     |
| Essex                  | 6     |
| Hertfordshire          | 6     |
| Luton                  | 6     |
| Norfolk                | 6     |
| Peterborough           | 6     |
| Southend-on-Sea        | 6     |
| Suffolk                | 6     |
| Thurrock               | 6     |
| Greater London         | 5     |
| Barking and Dagenham   | 6     |
| Barnet                 | 6     |
| Bexley                 | 6     |
| Brent                  | 6     |
| Bromley                | 6     |
| Camden                 | 6     |
| Croydon                | 6     |
| Ealing                 | 6     |
| Enfield                | 6     |
| Greenwich              | 6     |
| Hackney                | 6     |
| Hammersmith and Fulham | 6     |
| Haringey               | 6     |
| Harrow                 | 6     |
| Havering               | 6     |
| Hillingdon             | 6     |
| Hounslow               | 6     |
| Islington              | 6     |
| Kensington and Chelsea | 6     |
| Kingston upon Thames   | 6     |
| Lambeth                | 6     |
| Lewisham               | 6     |
| Merton                 | 6     |
| Newham                 | 6     |
| Redbridge              | 6     |
| Richmond upon Thames   | 6     |
| Southwark              | 6     |
| Sutton                 | 6     |

**Appendix Table 3. GBD 2016 location hierarchy with levels**

|                           | Level |
|---------------------------|-------|
| Tower Hamlets             | 6     |
| Waltham Forest            | 6     |
| Wandsworth                | 6     |
| Westminster               | 6     |
| North East England        | 5     |
| County Durham             | 6     |
| Darlington                | 6     |
| Gateshead                 | 6     |
| Hartlepool                | 6     |
| Middlesbrough             | 6     |
| Newcastle upon Tyne       | 6     |
| North Tyneside            | 6     |
| Northumberland            | 6     |
| Redcar and Cleveland      | 6     |
| South Tyneside            | 6     |
| Stockton-on-Tees          | 6     |
| Sunderland                | 6     |
| North West England        | 5     |
| Blackburn with Darwen     | 6     |
| Blackpool                 | 6     |
| Bolton                    | 6     |
| Bury                      | 6     |
| Cheshire East             | 6     |
| Cheshire West and Chester | 6     |
| Cumbria                   | 6     |
| Halton                    | 6     |
| Knowsley                  | 6     |
| Lancashire                | 6     |
| Liverpool                 | 6     |
| Manchester                | 6     |
| Oldham                    | 6     |
| Rochdale                  | 6     |
| Salford                   | 6     |
| Sefton                    | 6     |
| St Helens                 | 6     |
| Stockport                 | 6     |
| Tameside                  | 6     |
| Trafford                  | 6     |
| Warrington                | 6     |
| Wigan                     | 6     |
| Wirral                    | 6     |
| South East England        | 5     |
| Bracknell Forest          | 6     |
| Brighton and Hove         | 6     |



**Appendix Table 3. GBD 2016 location hierarchy with levels**

|                              | Level |
|------------------------------|-------|
| Buckinghamshire              | 6     |
| East Sussex                  | 6     |
| Hampshire                    | 6     |
| Isle of Wight                | 6     |
| Kent                         | 6     |
| Medway                       | 6     |
| Milton Keynes                | 6     |
| Oxfordshire                  | 6     |
| Portsmouth                   | 6     |
| Reading                      | 6     |
| Slough                       | 6     |
| Southampton                  | 6     |
| Surrey                       | 6     |
| West Berkshire               | 6     |
| West Sussex                  | 6     |
| Windsor and Maidenhead       | 6     |
| Wokingham                    | 6     |
| South West England           | 5     |
| Bath and North East Somerset | 6     |
| Bournemouth                  | 6     |
| Bristol, City of             | 6     |
| Cornwall                     | 6     |
| Devon                        | 6     |
| Dorset                       | 6     |
| Gloucestershire              | 6     |
| North Somerset               | 6     |
| Plymouth                     | 6     |
| Poole                        | 6     |
| Somerset                     | 6     |
| South Gloucestershire        | 6     |
| Swindon                      | 6     |
| Torbay                       | 6     |
| Wiltshire                    | 6     |
| West Midlands                | 5     |
| Birmingham                   | 6     |
| Coventry                     | 6     |
| Dudley                       | 6     |
| Herefordshire, County of     | 6     |
| Sandwell                     | 6     |
| Shropshire                   | 6     |
| Solihull                     | 6     |
| Staffordshire                | 6     |
| Stoke-on-Trent               | 6     |
| Telford and Wrekin           | 6     |

**Appendix Table 3. GBD 2016 location hierarchy with levels**

|                             | Level |
|-----------------------------|-------|
| Walsall                     | 6     |
| Warwickshire                | 6     |
| Wolverhampton               | 6     |
| Worcestershire              | 6     |
| Yorkshire and the Humber    | 5     |
| Barnsley                    | 6     |
| Bradford                    | 6     |
| Calderdale                  | 6     |
| Doncaster                   | 6     |
| East Riding of Yorkshire    | 6     |
| Kingston upon Hull, City of | 6     |
| Kirklees                    | 6     |
| Leeds                       | 6     |
| North East Lincolnshire     | 6     |
| North Lincolnshire          | 6     |
| North Yorkshire             | 6     |
| Rotherham                   | 6     |
| Sheffield                   | 6     |
| Wakefield                   | 6     |
| York                        | 6     |
| Northern Ireland            | 4     |
| Scotland                    | 4     |
| Wales                       | 4     |
| Southern Latin America      | 2     |
| Argentina                   | 3     |
| Chile                       | 3     |
| Uruguay                     | 3     |
| High-income North America   | 2     |
| Canada                      | 3     |
| United States               | 3     |
| Alabama                     | 4     |
| Alaska                      | 4     |
| Arizona                     | 4     |
| Arkansas                    | 4     |
| California                  | 4     |
| Colorado                    | 4     |
| Connecticut                 | 4     |
| Delaware                    | 4     |
| District of Columbia        | 4     |
| Florida                     | 4     |
| Georgia                     | 4     |
| Hawaii                      | 4     |
| Idaho                       | 4     |
| Illinois                    | 4     |

**Appendix Table 3. GBD 2016 location hierarchy with levels**

|                             | Level |
|-----------------------------|-------|
| Indiana                     | 4     |
| Iowa                        | 4     |
| Kansas                      | 4     |
| Kentucky                    | 4     |
| Louisiana                   | 4     |
| Maine                       | 4     |
| Maryland                    | 4     |
| Massachusetts               | 4     |
| Michigan                    | 4     |
| Minnesota                   | 4     |
| Mississippi                 | 4     |
| Missouri                    | 4     |
| Montana                     | 4     |
| Nebraska                    | 4     |
| Nevada                      | 4     |
| New Hampshire               | 4     |
| New Jersey                  | 4     |
| New Mexico                  | 4     |
| New York                    | 4     |
| North Carolina              | 4     |
| North Dakota                | 4     |
| Ohio                        | 4     |
| Oklahoma                    | 4     |
| Oregon                      | 4     |
| Pennsylvania                | 4     |
| Puerto Rico                 | 4     |
| Rhode Island                | 4     |
| South Carolina              | 4     |
| South Dakota                | 4     |
| Tennessee                   | 4     |
| Texas                       | 4     |
| Utah                        | 4     |
| Vermont                     | 4     |
| Virginia                    | 4     |
| Washington                  | 4     |
| West Virginia               | 4     |
| Wisconsin                   | 4     |
| Wyoming                     | 4     |
| Latin America and Caribbean | 1     |
| Caribbean                   | 2     |
| Antigua and Barbuda         | 3     |
| The Bahamas                 | 3     |
| Barbados                    | 3     |
| Belize                      | 3     |

**Appendix Table 3. GBD 2016 location hierarchy with levels**

|                                  | Level |
|----------------------------------|-------|
| Bermuda                          | 3     |
| Cuba                             | 3     |
| Dominica                         | 3     |
| Dominican Republic               | 3     |
| Grenada                          | 3     |
| Guyana                           | 3     |
| Haiti                            | 3     |
| Jamaica                          | 3     |
| Saint Lucia                      | 3     |
| Saint Vincent and the Grenadines | 3     |
| Suriname                         | 3     |
| Trinidad and Tobago              | 3     |
| Andean Latin America             | 2     |
| Bolivia                          | 3     |
| Ecuador                          | 3     |
| Peru                             | 3     |
| Central Latin America            | 2     |
| Colombia                         | 3     |
| Costa Rica                       | 3     |
| El Salvador                      | 3     |
| Guatemala                        | 3     |
| Honduras                         | 3     |
| Mexico                           | 3     |
| Aguascalientes                   | 4     |
| Baja California                  | 4     |
| Baja California Sur              | 4     |
| Campeche                         | 4     |
| Chiapas                          | 4     |
| Chihuahua                        | 4     |
| Coahuila                         | 4     |
| Colima                           | 4     |
| Distrito Federal                 | 4     |
| Durango                          | 4     |
| Guanajuato                       | 4     |
| Guerrero                         | 4     |
| Hidalgo                          | 4     |
| Jalisco                          | 4     |
| Mexico                           | 4     |
| Michoacan de Ocampo              | 4     |
| Morelos                          | 4     |
| Nayarit                          | 4     |
| Nuevo Leon                       | 4     |
| Oaxaca                           | 4     |
| Puebla                           | 4     |

**Appendix Table 3. GBD 2016 location hierarchy with levels**

|                                 | Level |
|---------------------------------|-------|
| Queretaro                       | 4     |
| Quintana Roo                    | 4     |
| San Luis Potosi                 | 4     |
| Sinaloa                         | 4     |
| Sonora                          | 4     |
| Tabasco                         | 4     |
| Tamaulipas                      | 4     |
| Tlaxcala                        | 4     |
| Veracruz de Ignacio de la Llave | 4     |
| Yucatan                         | 4     |
| Zacatecas                       | 4     |
| Nicaragua                       | 3     |
| Panama                          | 3     |
| Venezuela                       | 3     |
| Tropical Latin America          | 2     |
| Brazil                          | 3     |
| Acre                            | 4     |
| Alagoas                         | 4     |
| Amapa                           | 4     |
| Amazonas                        | 4     |
| Bahia                           | 4     |
| Ceara                           | 4     |
| Distrito Federal                | 4     |
| Espirito Santo                  | 4     |
| Goias                           | 4     |
| Maranhao                        | 4     |
| Mato Grosso                     | 4     |
| Mato Grosso do Sul              | 4     |
| Minas Gerais                    | 4     |
| Para                            | 4     |
| Paraiba                         | 4     |
| Parana                          | 4     |
| Pernambuco                      | 4     |
| Piaui                           | 4     |
| Rio de Janeiro                  | 4     |
| Rio Grande do Norte             | 4     |
| Rio Grande do Sul               | 4     |
| Rondonia                        | 4     |
| Roraima                         | 4     |
| Santa Catarina                  | 4     |
| Sao Paulo                       | 4     |
| Sergipe                         | 4     |
| Tocantins                       | 4     |
| Paraguay                        | 3     |

**Appendix Table 3. GBD 2016 location hierarchy with levels**

|                                    | Level |
|------------------------------------|-------|
| North Africa and Middle East       | 1     |
| North Africa and Middle East       | 2     |
| Afghanistan                        | 3     |
| Algeria                            | 3     |
| Bahrain                            | 3     |
| Egypt                              | 3     |
| Iran                               | 3     |
| Iraq                               | 3     |
| Jordan                             | 3     |
| Kuwait                             | 3     |
| Lebanon                            | 3     |
| Libya                              | 3     |
| Morocco                            | 3     |
| Palestine                          | 3     |
| Oman                               | 3     |
| Qatar                              | 3     |
| Sudan                              | 3     |
| Saudi Arabia                       | 3     |
| Syria                              | 3     |
| Tunisia                            | 3     |
| Turkey                             | 3     |
| United Arab Emirates               | 3     |
| Yemen                              | 3     |
| South Asia                         | 1     |
| South Asia                         | 2     |
| Bangladesh                         | 3     |
| Bhutan                             | 3     |
| India                              | 3     |
| Andaman and Nicobar Islands, Rural | 4     |
| Andaman and Nicobar Islands, Urban | 4     |
| Andhra Pradesh, Rural              | 4     |
| Andhra Pradesh, Urban              | 4     |
| Arunachal Pradesh, Rural           | 4     |
| Arunachal Pradesh, Urban           | 4     |
| Assam, Rural                       | 4     |
| Assam, Urban                       | 4     |
| Bihar, Rural                       | 4     |
| Bihar, Urban                       | 4     |
| Chandigarh, Rural                  | 4     |
| Chandigarh, Urban                  | 4     |
| Chhattisgarh, Rural                | 4     |
| Chhattisgarh, Urban                | 4     |
| Dadra and Nagar Haveli, Rural      | 4     |
| Dadra and Nagar Haveli, Urban      | 4     |

**Appendix Table 3. GBD 2016 location hierarchy with levels**

|                          | Level |
|--------------------------|-------|
| Daman and Diu, Rural     | 4     |
| Daman and Diu, Urban     | 4     |
| Delhi, Rural             | 4     |
| Delhi, Urban             | 4     |
| Goa, Rural               | 4     |
| Goa, Urban               | 4     |
| Gujarat, Rural           | 4     |
| Gujarat, Urban           | 4     |
| Haryana, Rural           | 4     |
| Haryana, Urban           | 4     |
| Himachal Pradesh, Rural  | 4     |
| Himachal Pradesh, Urban  | 4     |
| Jammu and Kashmir, Rural | 4     |
| Jammu and Kashmir, Urban | 4     |
| Jharkhand, Rural         | 4     |
| Jharkhand, Urban         | 4     |
| Karnataka, Rural         | 4     |
| Karnataka, Urban         | 4     |
| Kerala, Rural            | 4     |
| Kerala, Urban            | 4     |
| Lakshadweep, Rural       | 4     |
| Lakshadweep, Urban       | 4     |
| Madhya Pradesh, Rural    | 4     |
| Madhya Pradesh, Urban    | 4     |
| Maharashtra, Rural       | 4     |
| Maharashtra, Urban       | 4     |
| Manipur, Rural           | 4     |
| Manipur, Urban           | 4     |
| Meghalaya, Rural         | 4     |
| Meghalaya, Urban         | 4     |
| Mizoram, Rural           | 4     |
| Mizoram, Urban           | 4     |
| Nagaland, Rural          | 4     |
| Nagaland, Urban          | 4     |
| Orissa, Rural            | 4     |
| Orissa, Urban            | 4     |
| Puducherry, Rural        | 4     |
| Puducherry, Urban        | 4     |
| Punjab, Rural            | 4     |
| Punjab, Urban            | 4     |
| Rajasthan, Rural         | 4     |
| Rajasthan, Urban         | 4     |
| Sikkim, Rural            | 4     |
| Sikkim, Urban            | 4     |

**Appendix Table 3. GBD 2016 location hierarchy with levels**

|                                  | Level |
|----------------------------------|-------|
| Tamil Nadu, Rural                | 4     |
| Tamil Nadu, Urban                | 4     |
| Telangana, Rural                 | 4     |
| Telangana, Urban                 | 4     |
| Tripura, Rural                   | 4     |
| Tripura, Urban                   | 4     |
| Uttar Pradesh, Rural             | 4     |
| Uttar Pradesh, Urban             | 4     |
| Uttarakhand, Rural               | 4     |
| Uttarakhand, Urban               | 4     |
| West Bengal, Rural               | 4     |
| West Bengal, Urban               | 4     |
| Nepal                            | 3     |
| Pakistan                         | 3     |
| Sub-Saharan Africa               | 1     |
| Central Sub-Saharan Africa       | 2     |
| Angola                           | 3     |
| Central African Republic         | 3     |
| Congo (Brazzaville)              | 3     |
| Democratic Republic of the Congo | 3     |
| Equatorial Guinea                | 3     |
| Gabon                            | 3     |
| Eastern Sub-Saharan Africa       | 2     |
| Burundi                          | 3     |
| Comoros                          | 3     |
| Djibouti                         | 3     |
| Eritrea                          | 3     |
| Ethiopia                         | 3     |
| Kenya                            | 3     |
| Baringo                          | 4     |
| Bomet                            | 4     |
| Bungoma                          | 4     |
| Busia                            | 4     |
| Elgeyo-Marakwet                  | 4     |
| Embu                             | 4     |
| Garissa                          | 4     |
| HomaBay                          | 4     |
| Isiolo                           | 4     |
| Kajiado                          | 4     |
| Kakamega                         | 4     |
| Kericho                          | 4     |
| Kiambu                           | 4     |
| Kilifi                           | 4     |
| Kirinyaga                        | 4     |



**Appendix Table 3. GBD 2016 location hierarchy with levels**

|                             | Level |
|-----------------------------|-------|
| Kisii                       | 4     |
| Kisumu                      | 4     |
| Kitui                       | 4     |
| Kwale                       | 4     |
| Laikipia                    | 4     |
| Lamu                        | 4     |
| Machakos                    | 4     |
| Makueni                     | 4     |
| Mandera                     | 4     |
| Marsabit                    | 4     |
| Meru                        | 4     |
| Migori                      | 4     |
| Mombasa                     | 4     |
| Murang'a                    | 4     |
| Nairobi                     | 4     |
| Nakuru                      | 4     |
| Nandi                       | 4     |
| Narok                       | 4     |
| Nyamira                     | 4     |
| Nyandarua                   | 4     |
| Nyeri                       | 4     |
| Samburu                     | 4     |
| Siaya                       | 4     |
| TaitaTaveta                 | 4     |
| TanaRiver                   | 4     |
| TharakaNithi                | 4     |
| TransNzoia                  | 4     |
| Turkana                     | 4     |
| UasinGishu                  | 4     |
| Vihiga                      | 4     |
| Wajir                       | 4     |
| WestPokot                   | 4     |
| Madagascar                  | 3     |
| Malawi                      | 3     |
| Mozambique                  | 3     |
| Rwanda                      | 3     |
| Somalia                     | 3     |
| South Sudan                 | 3     |
| Tanzania                    | 3     |
| Uganda                      | 3     |
| Zambia                      | 3     |
| Southern Sub-Saharan Africa | 2     |
| Botswana                    | 3     |
| Lesotho                     | 3     |

**Appendix Table 3. GBD 2016 location hierarchy with levels**

|                            | Level |
|----------------------------|-------|
| Namibia                    | 3     |
| South Africa               | 3     |
| Eastern Cape               | 4     |
| Free State                 | 4     |
| Gauteng                    | 4     |
| KwaZulu-Natal              | 4     |
| Limpopo                    | 4     |
| Mpumalanga                 | 4     |
| North-West                 | 4     |
| Northern Cape              | 4     |
| Western Cape               | 4     |
| Swaziland                  | 3     |
| Zimbabwe                   | 3     |
| Western Sub-Saharan Africa | 2     |
| Benin                      | 3     |
| Burkina Faso               | 3     |
| Cameroon                   | 3     |
| Cape Verde                 | 3     |
| Chad                       | 3     |
| Cote d'Ivoire              | 3     |
| The Gambia                 | 3     |
| Ghana                      | 3     |
| Guinea                     | 3     |
| Guinea-Bissau              | 3     |
| Liberia                    | 3     |
| Mali                       | 3     |
| Mauritania                 | 3     |
| Niger                      | 3     |
| Nigeria                    | 3     |
| Sao Tome and Principe      | 3     |
| Senegal                    | 3     |
| Sierra Leone               | 3     |
| Togo                       | 3     |

**Appendix Table 4. Socio-demographic Index groupings by geography, based on 2016 values**

| <b>Location</b>              | <b>SDI Level</b> |
|------------------------------|------------------|
| Aichi                        | High SDI         |
| Akita                        | High SDI         |
| Alabama                      | High SDI         |
| Alaska                       | High SDI         |
| Andorra                      | High SDI         |
| Aomori                       | High SDI         |
| Arizona                      | High SDI         |
| Arkansas                     | High SDI         |
| Australia                    | High SDI         |
| Austria                      | High SDI         |
| Barking and Dagenham         | High SDI         |
| Barnet                       | High SDI         |
| Barnsley                     | High SDI         |
| Bath and North East Somerset | High SDI         |
| Bedford                      | High SDI         |
| Belgium                      | High SDI         |
| Bexley                       | High SDI         |
| Birmingham                   | High SDI         |
| Blackburn with Darwen        | High SDI         |
| Blackpool                    | High SDI         |
| Bolton                       | High SDI         |
| Bournemouth                  | High SDI         |
| Bracknell Forest             | High SDI         |
| Bradford                     | High SDI         |
| Brent                        | High SDI         |
| Brighton and Hove            | High SDI         |
| Bristol, City of             | High SDI         |
| Bromley                      | High SDI         |
| Brunei                       | High SDI         |
| Buckinghamshire              | High SDI         |
| Bury                         | High SDI         |
| Calderdale                   | High SDI         |
| California                   | High SDI         |
| Cambridgeshire               | High SDI         |
| Camden                       | High SDI         |
| Canada                       | High SDI         |
| Central Bedfordshire         | High SDI         |
| Cheshire East                | High SDI         |
| Cheshire West and Chester    | High SDI         |
| Chiba                        | High SDI         |
| Colorado                     | High SDI         |
| Connecticut                  | High SDI         |
| Cornwall                     | High SDI         |
| County Durham                | High SDI         |
| Coventry                     | High SDI         |
| Croatia                      | High SDI         |

| <b>Appendix Table 4. Socio-demographic Index groupings by geography, based on 2016 values</b> |          |
|-----------------------------------------------------------------------------------------------|----------|
| Croydon                                                                                       | High SDI |
| Cumbria                                                                                       | High SDI |
| Cyprus                                                                                        | High SDI |
| Czech Republic                                                                                | High SDI |
| Darlington                                                                                    | High SDI |
| Delaware                                                                                      | High SDI |
| Denmark                                                                                       | High SDI |
| Derby                                                                                         | High SDI |
| Derbyshire                                                                                    | High SDI |
| Devon                                                                                         | High SDI |
| District of Columbia                                                                          | High SDI |
| Doncaster                                                                                     | High SDI |
| Dorset                                                                                        | High SDI |
| Dudley                                                                                        | High SDI |
| Ealing                                                                                        | High SDI |
| East Riding of Yorkshire                                                                      | High SDI |
| East Sussex                                                                                   | High SDI |
| Ehime                                                                                         | High SDI |
| Enfield                                                                                       | High SDI |
| Essex                                                                                         | High SDI |
| Estonia                                                                                       | High SDI |
| Finland                                                                                       | High SDI |
| Florida                                                                                       | High SDI |
| France                                                                                        | High SDI |
| Fukui                                                                                         | High SDI |
| Fukuoka                                                                                       | High SDI |
| Fukushima                                                                                     | High SDI |
| Gateshead                                                                                     | High SDI |
| Georgia                                                                                       | High SDI |
| Germany                                                                                       | High SDI |
| Gifu                                                                                          | High SDI |
| Gloucestershire                                                                               | High SDI |
| Greece                                                                                        | High SDI |
| Greenwich                                                                                     | High SDI |
| Gunma                                                                                         | High SDI |
| Hackney                                                                                       | High SDI |
| Halton                                                                                        | High SDI |
| Hammersmith and Fulham                                                                        | High SDI |
| Hampshire                                                                                     | High SDI |
| Haringey                                                                                      | High SDI |
| Harrow                                                                                        | High SDI |
| Hartlepool                                                                                    | High SDI |
| Havering                                                                                      | High SDI |
| Hawaii                                                                                        | High SDI |
| Herefordshire, County of                                                                      | High SDI |
| Hertfordshire                                                                                 | High SDI |
| Hillingdon                                                                                    | High SDI |

| <b>Appendix Table 4. Socio-demographic Index groupings by geography, based on 2016 values</b> |          |
|-----------------------------------------------------------------------------------------------|----------|
| Hiroshima                                                                                     | High SDI |
| Hokkaido                                                                                      | High SDI |
| Hounslow                                                                                      | High SDI |
| Hyogo                                                                                         | High SDI |
| Ibaraki                                                                                       | High SDI |
| Iceland                                                                                       | High SDI |
| Idaho                                                                                         | High SDI |
| Illinois                                                                                      | High SDI |
| Indiana                                                                                       | High SDI |
| Iowa                                                                                          | High SDI |
| Ireland                                                                                       | High SDI |
| Ishikawa                                                                                      | High SDI |
| Isle of Wight                                                                                 | High SDI |
| Islington                                                                                     | High SDI |
| Italy                                                                                         | High SDI |
| Iwate                                                                                         | High SDI |
| Kagawa                                                                                        | High SDI |
| Kagoshima                                                                                     | High SDI |
| Kanagawa                                                                                      | High SDI |
| Kansas                                                                                        | High SDI |
| Kensington and Chelsea                                                                        | High SDI |
| Kent                                                                                          | High SDI |
| Kentucky                                                                                      | High SDI |
| Kingston upon Hull, City of                                                                   | High SDI |
| Kingston upon Thames                                                                          | High SDI |
| Kirklees                                                                                      | High SDI |
| Knowsley                                                                                      | High SDI |
| Kumamoto                                                                                      | High SDI |
| Kyoto                                                                                         | High SDI |
| Kochi                                                                                         | High SDI |
| Lambeth                                                                                       | High SDI |
| Lancashire                                                                                    | High SDI |
| Latvia                                                                                        | High SDI |
| Leeds                                                                                         | High SDI |
| Leicester                                                                                     | High SDI |
| Leicestershire                                                                                | High SDI |
| Lewisham                                                                                      | High SDI |
| Lincolnshire                                                                                  | High SDI |
| Lithuania                                                                                     | High SDI |
| Liverpool                                                                                     | High SDI |
| Louisiana                                                                                     | High SDI |
| Luton                                                                                         | High SDI |
| Luxembourg                                                                                    | High SDI |
| Maine                                                                                         | High SDI |
| Malta                                                                                         | High SDI |
| Manchester                                                                                    | High SDI |
| Maryland                                                                                      | High SDI |

**Appendix Table 4. Socio-demographic Index groupings by geography, based on 2016 values**

|                         |          |
|-------------------------|----------|
| Massachusetts           | High SDI |
| Medway                  | High SDI |
| Merton                  | High SDI |
| Michigan                | High SDI |
| Middlesbrough           | High SDI |
| Mie                     | High SDI |
| Milton Keynes           | High SDI |
| Minnesota               | High SDI |
| Mississippi             | High SDI |
| Missouri                | High SDI |
| Miyagi                  | High SDI |
| Miyazaki                | High SDI |
| Montana                 | High SDI |
| Nagano                  | High SDI |
| Nagasaki                | High SDI |
| Nara                    | High SDI |
| Nebraska                | High SDI |
| Netherlands             | High SDI |
| Nevada                  | High SDI |
| New Hampshire           | High SDI |
| New Jersey              | High SDI |
| New Mexico              | High SDI |
| New York                | High SDI |
| New Zealand             | High SDI |
| Newcastle upon Tyne     | High SDI |
| Newham                  | High SDI |
| Niigata                 | High SDI |
| Norfolk                 | High SDI |
| North Carolina          | High SDI |
| North Dakota            | High SDI |
| North East Lincolnshire | High SDI |
| North Lincolnshire      | High SDI |
| North Somerset          | High SDI |
| North Tyneside          | High SDI |
| North Yorkshire         | High SDI |
| Northamptonshire        | High SDI |
| Northern Ireland        | High SDI |
| Northumberland          | High SDI |
| Norway                  | High SDI |
| Nottingham              | High SDI |
| Nottinghamshire         | High SDI |
| Ohio                    | High SDI |
| Okayama                 | High SDI |
| Okinawa                 | High SDI |
| Oklahoma                | High SDI |
| Oldham                  | High SDI |
| Oregon                  | High SDI |

**Appendix Table 4. Socio-demographic Index groupings by geography, based on 2016 values**

|                       |          |
|-----------------------|----------|
| Oxfordshire           | High SDI |
| Pennsylvania          | High SDI |
| Peterborough          | High SDI |
| Plymouth              | High SDI |
| Poland                | High SDI |
| Poole                 | High SDI |
| Portsmouth            | High SDI |
| Puerto Rico           | High SDI |
| Reading               | High SDI |
| Redbridge             | High SDI |
| Redcar and Cleveland  | High SDI |
| Rhode Island          | High SDI |
| Richmond upon Thames  | High SDI |
| Rochdale              | High SDI |
| Rotherham             | High SDI |
| Rutland               | High SDI |
| Saga                  | High SDI |
| Saitama               | High SDI |
| Salford               | High SDI |
| Sandwell              | High SDI |
| Scotland              | High SDI |
| Sefton                | High SDI |
| Sheffield             | High SDI |
| Shiga                 | High SDI |
| Shimane               | High SDI |
| Shizuoka              | High SDI |
| Shropshire            | High SDI |
| Singapore             | High SDI |
| Slough                | High SDI |
| Slovakia              | High SDI |
| Slovenia              | High SDI |
| Solihull              | High SDI |
| Somerset              | High SDI |
| South Carolina        | High SDI |
| South Dakota          | High SDI |
| South Gloucestershire | High SDI |
| South Korea           | High SDI |
| South Tyneside        | High SDI |
| Southampton           | High SDI |
| Southend-on-Sea       | High SDI |
| Southwark             | High SDI |
| St Helens             | High SDI |
| Staffordshire         | High SDI |
| Stockholm             | High SDI |
| Stockport             | High SDI |
| Stockton-on-Tees      | High SDI |
| Stoke-on-Trent        | High SDI |

| <b>Appendix Table 4. Socio-demographic Index groupings by geography, based on 2016 values</b> |          |
|-----------------------------------------------------------------------------------------------|----------|
| Suffolk                                                                                       | High SDI |
| Sunderland                                                                                    | High SDI |
| Surrey                                                                                        | High SDI |
| Sutton                                                                                        | High SDI |
| Sweden except Stockholm                                                                       | High SDI |
| Swindon                                                                                       | High SDI |
| Switzerland                                                                                   | High SDI |
| Taiwan (Province of China)                                                                    | High SDI |
| Tameside                                                                                      | High SDI |
| Telford and Wrekin                                                                            | High SDI |
| Tennessee                                                                                     | High SDI |
| Texas                                                                                         | High SDI |
| Thurrock                                                                                      | High SDI |
| Tochigi                                                                                       | High SDI |
| Tokushima                                                                                     | High SDI |
| Torbay                                                                                        | High SDI |
| Tottori                                                                                       | High SDI |
| Tower Hamlets                                                                                 | High SDI |
| Toyama                                                                                        | High SDI |
| Trafford                                                                                      | High SDI |
| Tokyo                                                                                         | High SDI |
| Utah                                                                                          | High SDI |
| Vermont                                                                                       | High SDI |
| Virgin Islands, U.S.                                                                          | High SDI |
| Virginia                                                                                      | High SDI |
| Wakayama                                                                                      | High SDI |
| Wakefield                                                                                     | High SDI |
| Wales                                                                                         | High SDI |
| Walsall                                                                                       | High SDI |
| Waltham Forest                                                                                | High SDI |
| Wandsworth                                                                                    | High SDI |
| Warrington                                                                                    | High SDI |
| Warwickshire                                                                                  | High SDI |
| Washington                                                                                    | High SDI |
| West Berkshire                                                                                | High SDI |
| West Sussex                                                                                   | High SDI |
| West Virginia                                                                                 | High SDI |
| Westminster                                                                                   | High SDI |
| Wigan                                                                                         | High SDI |
| Wiltshire                                                                                     | High SDI |
| Windsor and Maidenhead                                                                        | High SDI |
| Wirral                                                                                        | High SDI |
| Wisconsin                                                                                     | High SDI |
| Wokingham                                                                                     | High SDI |
| Wolverhampton                                                                                 | High SDI |
| Worcestershire                                                                                | High SDI |
| Wyoming                                                                                       | High SDI |



| <b>Appendix Table 4. Socio-demographic Index groupings by geography, based on 2016 values</b> |                 |
|-----------------------------------------------------------------------------------------------|-----------------|
| Yamagata                                                                                      | High SDI        |
| Yamaguchi                                                                                     | High SDI        |
| Yamanashi                                                                                     | High SDI        |
| York                                                                                          | High SDI        |
| Oita                                                                                          | High SDI        |
| Osaka                                                                                         | High SDI        |
| 'Asir                                                                                         | High-middle SDI |
| Antigua and Barbuda                                                                           | High-middle SDI |
| Argentina                                                                                     | High-middle SDI |
| Armenia                                                                                       | High-middle SDI |
| Azerbaijan                                                                                    | High-middle SDI |
| Bahah                                                                                         | High-middle SDI |
| Barbados                                                                                      | High-middle SDI |
| Beijing                                                                                       | High-middle SDI |
| Belarus                                                                                       | High-middle SDI |
| Bermuda                                                                                       | High-middle SDI |
| Bulgaria                                                                                      | High-middle SDI |
| Chile                                                                                         | High-middle SDI |
| Cuba                                                                                          | High-middle SDI |
| Delhi, Urban                                                                                  | High-middle SDI |
| Distrito Federal                                                                              | High-middle SDI |
| Eastern Province                                                                              | High-middle SDI |
| Georgia                                                                                       | High-middle SDI |
| Goa, Urban                                                                                    | High-middle SDI |
| Greenland                                                                                     | High-middle SDI |
| Guam                                                                                          | High-middle SDI |
| Guangdong                                                                                     | High-middle SDI |
| Ha'il                                                                                         | High-middle SDI |
| Himachal Pradesh, Urban                                                                       | High-middle SDI |
| Hong Kong Special Administrative Region of China                                              | High-middle SDI |
| Hungary                                                                                       | High-middle SDI |
| Iran                                                                                          | High-middle SDI |
| Israel                                                                                        | High-middle SDI |
| Jakarta                                                                                       | High-middle SDI |
| Jawf                                                                                          | High-middle SDI |
| Jiangsu                                                                                       | High-middle SDI |
| Jizan                                                                                         | High-middle SDI |
| Kalimantan Timur                                                                              | High-middle SDI |
| Kalimantan Utara                                                                              | High-middle SDI |
| Kazakhstan                                                                                    | High-middle SDI |
| Kepulauan Riau                                                                                | High-middle SDI |
| Kuwait                                                                                        | High-middle SDI |
| Lebanon                                                                                       | High-middle SDI |
| Libya                                                                                         | High-middle SDI |
| Macao Special Administrative Region of China                                                  | High-middle SDI |
| Macedonia                                                                                     | High-middle SDI |
| Madinah                                                                                       | High-middle SDI |

| <b>Appendix Table 4. Socio-demographic Index groupings by geography, based on 2016 values</b> |                 |
|-----------------------------------------------------------------------------------------------|-----------------|
| Makkah                                                                                        | High-middle SDI |
| Malaysia                                                                                      | High-middle SDI |
| Mauritius                                                                                     | High-middle SDI |
| Montenegro                                                                                    | High-middle SDI |
| Najran                                                                                        | High-middle SDI |
| Northern Borders                                                                              | High-middle SDI |
| Northern Mariana Islands                                                                      | High-middle SDI |
| Panama                                                                                        | High-middle SDI |
| Portugal                                                                                      | High-middle SDI |
| Qassim                                                                                        | High-middle SDI |
| Qatar                                                                                         | High-middle SDI |
| Rio de Janeiro                                                                                | High-middle SDI |
| Riyadh                                                                                        | High-middle SDI |
| Romania                                                                                       | High-middle SDI |
| Russia                                                                                        | High-middle SDI |
| Serbia                                                                                        | High-middle SDI |
| Shanghai                                                                                      | High-middle SDI |
| Spain                                                                                         | High-middle SDI |
| Sao Paulo                                                                                     | High-middle SDI |
| Tabuk                                                                                         | High-middle SDI |
| The Bahamas                                                                                   | High-middle SDI |
| Tianjin                                                                                       | High-middle SDI |
| Trinidad and Tobago                                                                           | High-middle SDI |
| Turkey                                                                                        | High-middle SDI |
| Turkmenistan                                                                                  | High-middle SDI |
| Ukraine                                                                                       | High-middle SDI |
| United Arab Emirates                                                                          | High-middle SDI |
| Zhejiang                                                                                      | High-middle SDI |
| Aceh                                                                                          | Middle SDI      |
| Acre                                                                                          | Middle SDI      |
| Aguascalientes                                                                                | Middle SDI      |
| Albania                                                                                       | Middle SDI      |
| Algeria                                                                                       | Middle SDI      |
| Amapa                                                                                         | Middle SDI      |
| Amazonas                                                                                      | Middle SDI      |
| American Samoa                                                                                | Middle SDI      |
| Andhra Pradesh, Urban                                                                         | Middle SDI      |
| Anhui                                                                                         | Middle SDI      |
| Assam, Urban                                                                                  | Middle SDI      |
| Bahia                                                                                         | Middle SDI      |
| Bahrain                                                                                       | Middle SDI      |
| Baja California                                                                               | Middle SDI      |
| Baja California Sur                                                                           | Middle SDI      |
| Bali                                                                                          | Middle SDI      |
| Bangka Belitung                                                                               | Middle SDI      |
| Banten                                                                                        | Middle SDI      |
| Bengkulu                                                                                      | Middle SDI      |

| <b>Appendix Table 4. Socio-demographic Index groupings by geography, based on 2016 values</b> |            |
|-----------------------------------------------------------------------------------------------|------------|
| Bosnia and Herzegovina                                                                        | Middle SDI |
| Botswana                                                                                      | Middle SDI |
| Campeche                                                                                      | Middle SDI |
| Chhattisgarh, Urban                                                                           | Middle SDI |
| Chiapas                                                                                       | Middle SDI |
| Chihuahua                                                                                     | Middle SDI |
| Chongqing                                                                                     | Middle SDI |
| Coahuila                                                                                      | Middle SDI |
| Colima                                                                                        | Middle SDI |
| Colombia                                                                                      | Middle SDI |
| Costa Rica                                                                                    | Middle SDI |
| Delhi, Rural                                                                                  | Middle SDI |
| Distrito Federal                                                                              | Middle SDI |
| Dominica                                                                                      | Middle SDI |
| Dominican Republic                                                                            | Middle SDI |
| Durango                                                                                       | Middle SDI |
| Eastern Cape                                                                                  | Middle SDI |
| Ecuador                                                                                       | Middle SDI |
| Egypt                                                                                         | Middle SDI |
| El Salvador                                                                                   | Middle SDI |
| Equatorial Guinea                                                                             | Middle SDI |
| Espirito Santo                                                                                | Middle SDI |
| Fiji                                                                                          | Middle SDI |
| Free State                                                                                    | Middle SDI |
| Fujian                                                                                        | Middle SDI |
| Gauteng                                                                                       | Middle SDI |
| Goa, Rural                                                                                    | Middle SDI |
| Goiás                                                                                         | Middle SDI |
| Grenada                                                                                       | Middle SDI |
| Guanajuato                                                                                    | Middle SDI |
| Guangxi                                                                                       | Middle SDI |
| Guerrero                                                                                      | Middle SDI |
| Gujarat, Urban                                                                                | Middle SDI |
| Guyana                                                                                        | Middle SDI |
| Hainan                                                                                        | Middle SDI |
| Haryana, Urban                                                                                | Middle SDI |
| Hebei                                                                                         | Middle SDI |
| Heilongjiang                                                                                  | Middle SDI |
| Henan                                                                                         | Middle SDI |
| Hidalgo                                                                                       | Middle SDI |
| Himachal Pradesh, Rural                                                                       | Middle SDI |
| Hubei                                                                                         | Middle SDI |
| Hunan                                                                                         | Middle SDI |
| Inner Mongolia                                                                                | Middle SDI |
| Jalisco                                                                                       | Middle SDI |
| Jamaica                                                                                       | Middle SDI |
| Jambi                                                                                         | Middle SDI |

**Appendix Table 4. Socio-demographic Index groupings by geography, based on 2016 values**

|                          |            |
|--------------------------|------------|
| Jammu and Kashmir, Urban | Middle SDI |
| Jawa Barat               | Middle SDI |
| Jawa Timur               | Middle SDI |
| Jharkhand, Urban         | Middle SDI |
| Jiangxi                  | Middle SDI |
| Jilin                    | Middle SDI |
| Jordan                   | Middle SDI |
| Kalimantan Selatan       | Middle SDI |
| Kalimantan Tengah        | Middle SDI |
| Karnataka, Urban         | Middle SDI |
| Kerala, Rural            | Middle SDI |
| Kerala, Urban            | Middle SDI |
| KwaZulu-Natal            | Middle SDI |
| Lampung                  | Middle SDI |
| Liaoning                 | Middle SDI |
| Limpopo                  | Middle SDI |
| Madhya Pradesh, Urban    | Middle SDI |
| Maharashtra, Urban       | Middle SDI |
| Maldives                 | Middle SDI |
| Manipur, Urban           | Middle SDI |
| Mato Grosso              | Middle SDI |
| Mato Grosso do Sul       | Middle SDI |
| Meghalaya, Urban         | Middle SDI |
| Michoacan de Ocampo      | Middle SDI |
| Minas Gerais             | Middle SDI |
| Mizoram, Urban           | Middle SDI |
| Moldova                  | Middle SDI |
| Mongolia                 | Middle SDI |
| Morelos                  | Middle SDI |
| Mpumalanga               | Middle SDI |
| Mexico                   | Middle SDI |
| Nagaland, Urban          | Middle SDI |
| Nayarit                  | Middle SDI |
| Ningxia                  | Middle SDI |
| North-West               | Middle SDI |
| Northern Cape            | Middle SDI |
| Nuevo Leon               | Middle SDI |
| Oaxaca                   | Middle SDI |
| Oman                     | Middle SDI |
| Papua Barat              | Middle SDI |
| Paraguay                 | Middle SDI |
| Parana                   | Middle SDI |
| Pernambuco               | Middle SDI |
| Peru                     | Middle SDI |
| Philippines              | Middle SDI |
| Puebla                   | Middle SDI |
| Punjab, Urban            | Middle SDI |

| <b>Appendix Table 4. Socio-demographic Index groupings by geography, based on 2016 values</b> |            |
|-----------------------------------------------------------------------------------------------|------------|
| Qinghai                                                                                       | Middle SDI |
| Queretaro                                                                                     | Middle SDI |
| Quintana Roo                                                                                  | Middle SDI |
| Riau                                                                                          | Middle SDI |
| Rio Grande do Norte                                                                           | Middle SDI |
| Rio Grande do Sul                                                                             | Middle SDI |
| Rondonia                                                                                      | Middle SDI |
| Roraima                                                                                       | Middle SDI |
| Saint Lucia                                                                                   | Middle SDI |
| Saint Vincent and the Grenadines                                                              | Middle SDI |
| San Luis Potosi                                                                               | Middle SDI |
| Santa Catarina                                                                                | Middle SDI |
| Sergipe                                                                                       | Middle SDI |
| Seychelles                                                                                    | Middle SDI |
| Shaanxi                                                                                       | Middle SDI |
| Shandong                                                                                      | Middle SDI |
| Shanxi                                                                                        | Middle SDI |
| Sichuan                                                                                       | Middle SDI |
| Sikkim, Urban                                                                                 | Middle SDI |
| Sinaloa                                                                                       | Middle SDI |
| Sonora                                                                                        | Middle SDI |
| Sri Lanka                                                                                     | Middle SDI |
| Sulawesi Selatan                                                                              | Middle SDI |
| Sulawesi Utara                                                                                | Middle SDI |
| Sumatera Barat                                                                                | Middle SDI |
| Sumatera Selatan                                                                              | Middle SDI |
| Sumatera Utara                                                                                | Middle SDI |
| Suriname                                                                                      | Middle SDI |
| Tabasco                                                                                       | Middle SDI |
| Tamaulipas                                                                                    | Middle SDI |
| Tamil Nadu, Urban                                                                             | Middle SDI |
| Telangana, Urban                                                                              | Middle SDI |
| Thailand                                                                                      | Middle SDI |
| Union Territories other than Delhi, Urban                                                     | Middle SDI |
| Tlaxcala                                                                                      | Middle SDI |
| Tocantins                                                                                     | Middle SDI |
| Tunisia                                                                                       | Middle SDI |
| Uruguay                                                                                       | Middle SDI |
| Uttarakhand, Urban                                                                            | Middle SDI |
| Uzbekistan                                                                                    | Middle SDI |
| Venezuela                                                                                     | Middle SDI |
| Veracruz de Ignacio de la Llave                                                               | Middle SDI |
| Vietnam                                                                                       | Middle SDI |
| West Bengal, Urban                                                                            | Middle SDI |
| Western Cape                                                                                  | Middle SDI |
| Xinjiang                                                                                      | Middle SDI |
| Yogyakarta                                                                                    | Middle SDI |

| <b>Appendix Table 4. Socio-demographic Index groupings by geography, based on 2016 values</b> |                |
|-----------------------------------------------------------------------------------------------|----------------|
| Yucatan                                                                                       | Middle SDI     |
| Yunnan                                                                                        | Middle SDI     |
| Zacatecas                                                                                     | Middle SDI     |
| Alagoas                                                                                       | Low-middle SDI |
| Andhra Pradesh, Rural                                                                         | Low-middle SDI |
| Arunachal Pradesh, Rural                                                                      | Low-middle SDI |
| Arunachal Pradesh, Urban                                                                      | Low-middle SDI |
| Assam, Rural                                                                                  | Low-middle SDI |
| Bangladesh                                                                                    | Low-middle SDI |
| Baringo                                                                                       | Low-middle SDI |
| Belize                                                                                        | Low-middle SDI |
| Bhutan                                                                                        | Low-middle SDI |
| Bihar, Urban                                                                                  | Low-middle SDI |
| Bolivia                                                                                       | Low-middle SDI |
| Bomet                                                                                         | Low-middle SDI |
| Bungoma                                                                                       | Low-middle SDI |
| Busia                                                                                         | Low-middle SDI |
| Cambodia                                                                                      | Low-middle SDI |
| Cameroon                                                                                      | Low-middle SDI |
| Cape Verde                                                                                    | Low-middle SDI |
| Ceara                                                                                         | Low-middle SDI |
| Chhattisgarh, Rural                                                                           | Low-middle SDI |
| Congo                                                                                         | Low-middle SDI |
| Elgeyo-Marakwet                                                                               | Low-middle SDI |
| Embu                                                                                          | Low-middle SDI |
| Federated States of Micronesia                                                                | Low-middle SDI |
| Gabon                                                                                         | Low-middle SDI |
| Gansu                                                                                         | Low-middle SDI |
| Garissa                                                                                       | Low-middle SDI |
| Ghana                                                                                         | Low-middle SDI |
| Gorontalo                                                                                     | Low-middle SDI |
| Guatemala                                                                                     | Low-middle SDI |
| Guizhou                                                                                       | Low-middle SDI |
| Gujarat, Rural                                                                                | Low-middle SDI |
| Haryana, Rural                                                                                | Low-middle SDI |
| HomaBay                                                                                       | Low-middle SDI |
| Honduras                                                                                      | Low-middle SDI |
| Iraq                                                                                          | Low-middle SDI |
| Isiolo                                                                                        | Low-middle SDI |
| Jammu and Kashmir, Rural                                                                      | Low-middle SDI |
| Jawa Tengah                                                                                   | Low-middle SDI |
| Jharkhand, Rural                                                                              | Low-middle SDI |
| Kajiado                                                                                       | Low-middle SDI |
| Kakamega                                                                                      | Low-middle SDI |
| Kalimantan Barat                                                                              | Low-middle SDI |
| Karnataka, Rural                                                                              | Low-middle SDI |
| Kericho                                                                                       | Low-middle SDI |

| <b>Appendix Table 4. Socio-demographic Index groupings by geography, based on 2016 values</b> |                |
|-----------------------------------------------------------------------------------------------|----------------|
| Kiambu                                                                                        | Low-middle SDI |
| Kilifi                                                                                        | Low-middle SDI |
| Kirinyaga                                                                                     | Low-middle SDI |
| Kisii                                                                                         | Low-middle SDI |
| Kisumu                                                                                        | Low-middle SDI |
| Kitui                                                                                         | Low-middle SDI |
| Kwale                                                                                         | Low-middle SDI |
| Kyrgyzstan                                                                                    | Low-middle SDI |
| Laikipia                                                                                      | Low-middle SDI |
| Lamu                                                                                          | Low-middle SDI |
| Laos                                                                                          | Low-middle SDI |
| Lesotho                                                                                       | Low-middle SDI |
| Machakos                                                                                      | Low-middle SDI |
| Madhya Pradesh, Rural                                                                         | Low-middle SDI |
| Maharashtra, Rural                                                                            | Low-middle SDI |
| Makueni                                                                                       | Low-middle SDI |
| Maluku                                                                                        | Low-middle SDI |
| Maluku Utara                                                                                  | Low-middle SDI |
| Mandera                                                                                       | Low-middle SDI |
| Manipur, Rural                                                                                | Low-middle SDI |
| Maranhao                                                                                      | Low-middle SDI |
| Marsabit                                                                                      | Low-middle SDI |
| Marshall Islands                                                                              | Low-middle SDI |
| Mauritania                                                                                    | Low-middle SDI |
| Meghalaya, Rural                                                                              | Low-middle SDI |
| Meru                                                                                          | Low-middle SDI |
| Migori                                                                                        | Low-middle SDI |
| Mizoram, Rural                                                                                | Low-middle SDI |
| Mombasa                                                                                       | Low-middle SDI |
| Morocco                                                                                       | Low-middle SDI |
| Murang'a                                                                                      | Low-middle SDI |
| Myanmar                                                                                       | Low-middle SDI |
| Nagaland, Rural                                                                               | Low-middle SDI |
| Nairobi                                                                                       | Low-middle SDI |
| Nakuru                                                                                        | Low-middle SDI |
| Namibia                                                                                       | Low-middle SDI |
| Nandi                                                                                         | Low-middle SDI |
| Narok                                                                                         | Low-middle SDI |
| Nepal                                                                                         | Low-middle SDI |
| Nicaragua                                                                                     | Low-middle SDI |
| Nigeria                                                                                       | Low-middle SDI |
| North Korea                                                                                   | Low-middle SDI |
| Nusa Tenggara Barat                                                                           | Low-middle SDI |
| Nusa Tenggara Timur                                                                           | Low-middle SDI |
| Nyamira                                                                                       | Low-middle SDI |
| Nyandarua                                                                                     | Low-middle SDI |
| Nyeri                                                                                         | Low-middle SDI |

| <b>Appendix Table 4. Socio-demographic Index groupings by geography, based on 2016 values</b> |                |
|-----------------------------------------------------------------------------------------------|----------------|
| Odisha, Rural                                                                                 | Low-middle SDI |
| Odisha, Urban                                                                                 | Low-middle SDI |
| Pakistan                                                                                      | Low-middle SDI |
| Papua                                                                                         | Low-middle SDI |
| Paraiba                                                                                       | Low-middle SDI |
| Para                                                                                          | Low-middle SDI |
| Piaui                                                                                         | Low-middle SDI |
| Punjab, Rural                                                                                 | Low-middle SDI |
| Rajasthan, Rural                                                                              | Low-middle SDI |
| Rajasthan, Urban                                                                              | Low-middle SDI |
| Samburu                                                                                       | Low-middle SDI |
| Samoa                                                                                         | Low-middle SDI |
| Siaya                                                                                         | Low-middle SDI |
| Sikkim, Rural                                                                                 | Low-middle SDI |
| Sudan                                                                                         | Low-middle SDI |
| Sulawesi Barat                                                                                | Low-middle SDI |
| Sulawesi Tengah                                                                               | Low-middle SDI |
| Sulawesi Tenggara                                                                             | Low-middle SDI |
| Swaziland                                                                                     | Low-middle SDI |
| Syria                                                                                         | Low-middle SDI |
| TaitaTaveta                                                                                   | Low-middle SDI |
| Tajikistan                                                                                    | Low-middle SDI |
| Tamil Nadu, Rural                                                                             | Low-middle SDI |
| TanaRiver                                                                                     | Low-middle SDI |
| Telangana, Rural                                                                              | Low-middle SDI |
| TharakaNithi                                                                                  | Low-middle SDI |
| Union Territories other than Delhi, Rural                                                     | Low-middle SDI |
| Tibet                                                                                         | Low-middle SDI |
| Timor-Leste                                                                                   | Low-middle SDI |
| Tonga                                                                                         | Low-middle SDI |
| TransNzoia                                                                                    | Low-middle SDI |
| Tripura, Rural                                                                                | Low-middle SDI |
| Tripura, Urban                                                                                | Low-middle SDI |
| Turkana                                                                                       | Low-middle SDI |
| UasinGishu                                                                                    | Low-middle SDI |
| Uttar Pradesh, Rural                                                                          | Low-middle SDI |
| Uttar Pradesh, Urban                                                                          | Low-middle SDI |
| Uttarakhand, Rural                                                                            | Low-middle SDI |
| Vanuatu                                                                                       | Low-middle SDI |
| Vihiga                                                                                        | Low-middle SDI |
| Wajir                                                                                         | Low-middle SDI |
| West Bengal, Rural                                                                            | Low-middle SDI |
| WestPokot                                                                                     | Low-middle SDI |
| Zambia                                                                                        | Low-middle SDI |
| Zimbabwe                                                                                      | Low-middle SDI |
| Afghanistan                                                                                   | Low SDI        |
| Angola                                                                                        | Low SDI        |



| <b>Appendix Table 4. Socio-demographic Index groupings by geography, based on 2016 values</b> |         |
|-----------------------------------------------------------------------------------------------|---------|
| Benin                                                                                         | Low SDI |
| Bihar, Rural                                                                                  | Low SDI |
| Burkina Faso                                                                                  | Low SDI |
| Burundi                                                                                       | Low SDI |
| Central African Republic                                                                      | Low SDI |
| Chad                                                                                          | Low SDI |
| Comoros                                                                                       | Low SDI |
| Cote d'Ivoire                                                                                 | Low SDI |
| Democratic Republic of the Congo                                                              | Low SDI |
| Djibouti                                                                                      | Low SDI |
| Eritrea                                                                                       | Low SDI |
| Ethiopia                                                                                      | Low SDI |
| Guinea                                                                                        | Low SDI |
| Guinea-Bissau                                                                                 | Low SDI |
| Haiti                                                                                         | Low SDI |
| Kiribati                                                                                      | Low SDI |
| Liberia                                                                                       | Low SDI |
| Madagascar                                                                                    | Low SDI |
| Malawi                                                                                        | Low SDI |
| Mali                                                                                          | Low SDI |
| Mozambique                                                                                    | Low SDI |
| Niger                                                                                         | Low SDI |
| Palestine                                                                                     | Low SDI |
| Papua New Guinea                                                                              | Low SDI |
| Rwanda                                                                                        | Low SDI |
| Sao Tome and Principe                                                                         | Low SDI |
| Senegal                                                                                       | Low SDI |
| Sierra Leone                                                                                  | Low SDI |
| Solomon Islands                                                                               | Low SDI |
| Somalia                                                                                       | Low SDI |
| South Sudan                                                                                   | Low SDI |
| Tanzania                                                                                      | Low SDI |
| The Gambia                                                                                    | Low SDI |
| Togo                                                                                          | Low SDI |
| Uganda                                                                                        | Low SDI |
| Yemen                                                                                         | Low SDI |

| Appendix Table 5A. SDI Values by location, 1970-1989 |        |        |        |        |        |        |        |        |        |        |        |        |        |        |        |        |        |        |        |        |  |
|------------------------------------------------------|--------|--------|--------|--------|--------|--------|--------|--------|--------|--------|--------|--------|--------|--------|--------|--------|--------|--------|--------|--------|--|
| Location                                             | 1970   | 1971   | 1972   | 1973   | 1974   | 1975   | 1976   | 1977   | 1978   | 1979   | 1980   | 1981   | 1982   | 1983   | 1984   | 1985   | 1986   | 1987   | 1988   | 1989   |  |
| Global                                               | 0.4542 | 0.4623 | 0.4709 | 0.4794 | 0.4876 | 0.4952 | 0.5023 | 0.5089 | 0.5149 | 0.5204 | 0.5256 | 0.5306 | 0.5351 | 0.5397 | 0.5443 | 0.5490 | 0.5537 | 0.5586 | 0.5638 | 0.5691 |  |
| Southeast Asia, East Asia, and Oceania               | 0.3162 | 0.3305 | 0.3449 | 0.3597 | 0.3737 | 0.3867 | 0.3984 | 0.4094 | 0.4199 | 0.4292 | 0.4375 | 0.4454 | 0.4532 | 0.4611 | 0.4697 | 0.4781 | 0.4865 | 0.4951 | 0.5039 | 0.5125 |  |
| East Asia                                            | 0.3066 | 0.3233 | 0.3397 | 0.3562 | 0.3715 | 0.3854 | 0.3974 | 0.4084 | 0.4190 | 0.4282 | 0.4360 | 0.4430 | 0.4504 | 0.4582 | 0.4673 | 0.4767 | 0.4860 | 0.4958 | 0.5057 | 0.5149 |  |
| China                                                | 0.2951 | 0.3113 | 0.3270 | 0.3429 | 0.3575 | 0.3712 | 0.3826 | 0.3930 | 0.4035 | 0.4126 | 0.4204 | 0.4276 | 0.4353 | 0.4436 | 0.4532 | 0.4632 | 0.4731 | 0.4834 | 0.4937 | 0.5031 |  |
| North Korea                                          | 0.3879 | 0.4009 | 0.4123 | 0.4233 | 0.4328 | 0.4412 | 0.4487 | 0.4553 | 0.4611 | 0.4664 | 0.4714 | 0.4760 | 0.4805 | 0.4846 | 0.4882 | 0.4914 | 0.4942 | 0.4968 | 0.4993 | 0.5019 |  |
| Taiwan (Province of China)                           | 0.5024 | 0.5235 | 0.5415 | 0.5586 | 0.5744 | 0.5775 | 0.5873 | 0.6037 | 0.6122 | 0.6239 | 0.6356 | 0.6454 | 0.6572 | 0.6687 | 0.6812 | 0.6953 | 0.7060 | 0.7105 | 0.7181 | 0.7268 |  |
| Hong Kong Special Administrative Region of China     | 0.5167 | 0.5269 | 0.5379 | 0.5506 | 0.5645 | 0.5776 | 0.5900 | 0.6014 | 0.6121 | 0.6225 | 0.6331 | 0.6427 | 0.6520 | 0.6617 | 0.6713 | 0.6773 | 0.6824 | 0.6881 | 0.6937 | 0.6988 |  |
| Macao Special Administrative Region of China         | 0.5409 | 0.5521 | 0.5630 | 0.5734 | 0.5836 | 0.5937 | 0.6034 | 0.6133 | 0.6224 | 0.6303 | 0.6379 | 0.6463 | 0.6537 | 0.6604 | 0.6668 | 0.6725 | 0.6779 | 0.6837 | 0.6893 | 0.6948 |  |
| China (without Hong Kong and Macao)                  | 0.2900 | 0.3062 | 0.3217 | 0.3375 | 0.3519 | 0.3654 | 0.3765 | 0.3866 | 0.3968 | 0.4057 | 0.4132 | 0.4202 | 0.4280 | 0.4363 | 0.4461 | 0.4564 | 0.4665 | 0.4770 | 0.4874 | 0.4978 |  |
| Anhui                                                | 0.2312 | 0.2479 | 0.2638 | 0.2798 | 0.2942 | 0.3076 | 0.3183 | 0.3279 | 0.3377 | 0.3460 | 0.3530 | 0.3596 | 0.3668 | 0.3753 | 0.3853 | 0.3958 | 0.4061 | 0.4168 | 0.4274 | 0.4373 |  |
| Beijing                                              | 0.5218 | 0.5325 | 0.5429 | 0.5534 | 0.5634 | 0.5731 | 0.5817 | 0.5872 | 0.5936 | 0.5998 | 0.6057 | 0.6116 | 0.6179 | 0.6242 | 0.6311 | 0.6384 | 0.6455 | 0.6526 | 0.6592 | 0.6649 |  |
| Chongqing                                            | 0.2204 | 0.2414 | 0.2614 | 0.2811 | 0.2988 | 0.3149 | 0.3271 | 0.3379 | 0.3489 | 0.3584 | 0.3668 | 0.3751 | 0.3843 | 0.3944 | 0.4066 | 0.4191 | 0.4311 | 0.4431 | 0.4544 | 0.4643 |  |
| Fujian                                               | 0.2628 | 0.2770 | 0.2903 | 0.3043 | 0.3169 | 0.3290 | 0.3386 | 0.3474 | 0.3569 | 0.3651 | 0.3718 | 0.3781 | 0.3860 | 0.3957 | 0.4078 | 0.4203 | 0.4327 | 0.4454 | 0.4576 | 0.4687 |  |
| Gansu                                                | 0.2191 | 0.2385 | 0.2579 | 0.2760 | 0.2921 | 0.3069 | 0.3186 | 0.3288 | 0.3384 | 0.3465 | 0.3526 | 0.3579 | 0.3643 | 0.3723 | 0.3817 | 0.3914 | 0.4009 | 0.4111 | 0.4213 | 0.4305 |  |
| Guangdong                                            | 0.3331 | 0.3462 | 0.3589 | 0.3724 | 0.3850 | 0.3971 | 0.4073 | 0.4169 | 0.4272 | 0.4362 | 0.4437 | 0.4506 | 0.4583 | 0.4666 | 0.4764 | 0.4867 | 0.4966 | 0.5071 | 0.5175 | 0.5269 |  |
| Guangxi                                              | 0.2462 | 0.2610 | 0.2748 | 0.2891 | 0.3020 | 0.3144 | 0.3244 | 0.3339 | 0.3442 | 0.3533 | 0.3612 | 0.3685 | 0.3764 | 0.3851 | 0.3952 | 0.4062 | 0.4168 | 0.4279 | 0.4387 | 0.4488 |  |
| Guizhou                                              | 0.1183 | 0.1465 | 0.1706 | 0.1926 | 0.2112 | 0.2276 | 0.2402 | 0.2511 | 0.2621 | 0.2713 | 0.2791 | 0.2866 | 0.2946 | 0.3034 | 0.3141 | 0.3254 | 0.3364 | 0.3473 | 0.3580 | 0.3677 |  |
| Hainan                                               | 0.3561 | 0.3667 | 0.3769 | 0.3877 | 0.3977 | 0.4071 | 0.4146 | 0.4212 | 0.4280 | 0.4337 | 0.4384 | 0.4428 | 0.4480 | 0.4539 | 0.4616 | 0.4696 | 0.4777 | 0.4863 | 0.4946 | 0.5024 |  |
| Hebei                                                | 0.3169 | 0.3297 | 0.3415 | 0.3539 | 0.3650 | 0.3760 | 0.3855 | 0.3942 | 0.4037 | 0.4124 | 0.4198 | 0.4267 | 0.4346 | 0.4427 | 0.4524 | 0.4624 | 0.4721 | 0.4822 | 0.4921 | 0.5005 |  |
| Heilongjiang                                         | 0.3745 | 0.3880 | 0.4011 | 0.4147 | 0.4273 | 0.4392 | 0.4489 | 0.4574 | 0.4653 | 0.4718 | 0.4772 | 0.4821 | 0.4881 | 0.4951 | 0.5038 | 0.5127 | 0.5216 | 0.5308 | 0.5399 | 0.5484 |  |
| Henan                                                | 0.2545 | 0.2692 | 0.2825 | 0.2963 | 0.3085 | 0.3204 | 0.3302 | 0.3394 | 0.3498 | 0.3595 | 0.3677 | 0.3753 | 0.3841 | 0.3938 | 0.4054 | 0.4175 | 0.4291 | 0.4412 | 0.4529 | 0.4630 |  |
| Hubei                                                | 0.2577 | 0.2786 | 0.2986 | 0.3181 | 0.3358 | 0.3518 | 0.3649 | 0.3765 | 0.3880 | 0.3980 | 0.4065 | 0.4145 | 0.4229 | 0.4317 | 0.4418 | 0.4525 | 0.4630 | 0.4737 | 0.4844 | 0.4943 |  |
| Hunan                                                | 0.2320 | 0.2535 | 0.2743 | 0.2940 | 0.3116 | 0.3280 | 0.3412 | 0.3530 | 0.3649 | 0.3752 | 0.3835 | 0.3909 | 0.3994 | 0.4088 | 0.4196 | 0.4310 | 0.4420 | 0.4536 | 0.4653 | 0.4759 |  |
| Inner Mongolia                                       | 0.2781 | 0.2972 | 0.3147 | 0.3324 | 0.3481 | 0.3621 | 0.3730 | 0.3827 | 0.3922 | 0.4004 | 0.4068 | 0.4132 | 0.4216 | 0.4312 | 0.4437 | 0.4560 | 0.4680 | 0.4804 | 0.4923 | 0.5025 |  |
| Jiangsu                                              | 0.3200 | 0.3364 | 0.3515 | 0.3666 | 0.3803 | 0.3934 | 0.4043 | 0.4143 | 0.4251 | 0.4347 | 0.4430 | 0.4507 | 0.4593 | 0.4683 | 0.4786 | 0.4893 | 0.4997 | 0.5104 | 0.5209 | 0.5301 |  |
| Jiangxi                                              | 0.1547 | 0.1898 | 0.2197 | 0.2465 | 0.2693 | 0.2891 | 0.3046 | 0.3174 | 0.3292 | 0.3389 | 0.3468 | 0.3542 | 0.3622 | 0.3713 | 0.3822 | 0.3936 | 0.4047 | 0.4163 | 0.4281 | 0.4389 |  |
| Jilin                                                | 0.3492 | 0.3626 | 0.3753 | 0.3884 | 0.4003 | 0.4117 | 0.4209 | 0.4292 | 0.4376 | 0.4450 | 0.4512 | 0.4570 | 0.4638 | 0.4711 | 0.4804 | 0.4900 | 0.4995 | 0.5095 | 0.5193 | 0.5282 |  |
| Liaoning                                             | 0.4334 | 0.4444 | 0.4549 | 0.4658 | 0.4759 | 0.4857 | 0.4938 | 0.5013 | 0.5089 | 0.5156 | 0.5214 | 0.5268 | 0.5329 | 0.5394 | 0.5472 | 0.5552 | 0.5632 | 0.5713 | 0.5793 | 0.5865 |  |
| Ningxia                                              | 0.2262 | 0.2473 | 0.2677 | 0.2873 | 0.3049 | 0.3202 | 0.3328 | 0.3441 | 0.3546 | 0.3631 | 0.3699 | 0.3754 | 0.3817 | 0.3897 | 0.3982 | 0.4079 | 0.4184 | 0.4292 | 0.4402 | 0.4505 |  |
| Qinghai                                              | 0.1865 | 0.2121 | 0.2362 | 0.2598 | 0.2816 | 0.3006 | 0.3159 | 0.3287 | 0.3396 | 0.3480 | 0.3543 | 0.3597 | 0.3662 | 0.3752 | 0.3857 | 0.3970 | 0.4082 | 0.4195 | 0.4311 | 0.4423 |  |
| Shaanxi                                              | 0.2615 | 0.2789 | 0.2950 | 0.3112 | 0.3256 | 0.3391 | 0.3498 | 0.3595 | 0.3694 | 0.3781 | 0.3854 | 0.3925 | 0.4004 | 0.4089 | 0.4193 | 0.4301 | 0.4406 | 0.4514 | 0.4619 | 0.4713 |  |
| Shandong                                             | 0.3002 | 0.3142 | 0.3270 | 0.3402 | 0.3521 | 0.3639 | 0.3739 | 0.3835 | 0.3944 | 0.4044 | 0.4131 | 0.4215 | 0.4306 | 0.4402 | 0.4511 | 0.4628 | 0.4740 | 0.4855 | 0.4967 | 0.5065 |  |
| Shanghai                                             | 0.5669 | 0.5766 | 0.5860 | 0.5956 | 0.6048 | 0.6117 | 0.6168 | 0.6217 | 0.6271 | 0.6324 | 0.6375 | 0.6425 | 0.6477 | 0.6518 | 0.6562 | 0.6610 | 0.6657 | 0.6705 | 0.6751 | 0.6792 |  |
| Shanxi                                               | 0.3003 | 0.3159 | 0.3309 | 0.3464 | 0.3606 | 0.3739 | 0.3849 | 0.3949 | 0.4046 | 0.4129 | 0.4198 | 0.4261 | 0.4336 | 0.4419 | 0.4518 | 0.4620 | 0.4720 | 0.4824 | 0.4927 | 0.5021 |  |
| Sichuan                                              | 0.1488 | 0.1827 | 0.2120 | 0.2378 | 0.2604 | 0.2804 | 0.2961 | 0.3104 | 0.3250 | 0.3377 | 0.3488 | 0.3591 | 0.3693 | 0.3803 | 0.3924 | 0.4054 | 0.4178 | 0.4305 | 0.4428 | 0.4543 |  |
| Tianjin                                              | 0.4742 | 0.4857 | 0.4968 | 0.5079 | 0.5185 | 0.5292 | 0.5387 | 0.5476 | 0.5564 | 0.5631 | 0.5693 | 0.5753 | 0.5819 | 0.5886 | 0.5960 | 0.6036 | 0.6109 | 0.6180 | 0.6247 | 0.6303 |  |
| Tibet                                                | 0.2655 | 0.2749 | 0.2837 | 0.2933 | 0.3029 | 0.3120 | 0.3196 | 0.3265 | 0.3335 | 0.3393 | 0.3440 | 0.3482 | 0.3523 | 0.3570 | 0.3627 | 0.3693 | 0.3761 | 0.3831 | 0.3905 | 0.3981 |  |
| Xinjiang                                             | 0.2654 | 0.2786 | 0.2910 | 0.3054 | 0.3195 | 0.3321 | 0.3434 | 0.3542 | 0.3640 | 0.3716 | 0.3774 | 0.3830 | 0.3898 | 0.3985 | 0.4104 | 0.4227 | 0.4350 | 0.4483 | 0.4619 | 0.4745 |  |
| Yunnan                                               | 0.1374 | 0.1673 | 0.1933 | 0.2170 | 0.2376 | 0.2556 | 0.2698 | 0.2820 | 0.2936 | 0.3033 | 0.3114 | 0.3190 | 0.3269 | 0.3358 | 0.3464 | 0.3576 | 0.3687 | 0.3800 | 0.3913 | 0.4018 |  |
| Zhejiang                                             | 0.2983 | 0.3136 | 0.3278 | 0.3423 | 0.3555 | 0.3683 | 0.3788 | 0.3888 | 0.3997 | 0.4096 | 0.4179 | 0.4256 | 0.4349 | 0.4450 | 0.4569 | 0.4693 | 0.4810 | 0.4931 | 0.5048 | 0.5147 |  |
| Southeast Asia                                       | 0.3179 | 0.3263 | 0.3350 | 0.3443 | 0.3537 | 0.3629 | 0.3726 | 0.3823 | 0.3920 | 0.4017 | 0.4114 | 0.4214 | 0.4311 | 0.4406 | 0.4499 | 0.4586 | 0.4670 | 0.4752 | 0.4832 | 0.4911 |  |
| Cambodia                                             | 0.2325 | 0.2361 | 0.2395 | 0.2424 | 0.2449 | 0.2471 | 0.2496 | 0.2514 | 0.2539 | 0.2559 | 0.2580 | 0.2607 | 0.2636 | 0.2670 | 0.2709 | 0.2750 | 0.2790 | 0.2841 | 0.2900 | 0.2958 |  |
| Indonesia                                            | 0.3027 | 0.3112 | 0.3203 | 0.3301 | 0.3404 | 0.3505 | 0.3608 | 0.3712 | 0.3815 | 0.3919 | 0.4028 | 0.4141 | 0.4248 | 0.4355 | 0.4464 | 0.4568 | 0.4668 | 0.4760 | 0.4846 | 0.4930 |  |
| Laos                                                 | 0.1881 | 0.1928 | 0.1975 | 0.2024 | 0.2076 | 0.2129 | 0.2183 | 0.2237 | 0.2291 | 0.2342 | 0.2392 | 0.2454 | 0.2520 | 0.2588 | 0.2654 | 0.2722 | 0.2791 | 0.2855 | 0.2913 | 0.2973 |  |
| Malaysia                                             | 0.3882 | 0.3967 | 0.4087 | 0.4209 | 0.4327 | 0.4437 | 0.4563 | 0.4693 | 0.4799 | 0.4876 | 0.4946 | 0.5021 | 0.5096 | 0.5153 | 0.5185 | 0.5231 | 0.5314 | 0.5403 | 0.5490 | 0.5568 |  |
| Maldives                                             | 0.2758 | 0.2825 | 0.2893 | 0.2959 | 0.3027 | 0.3090 | 0.3149 | 0.3211 | 0.3279 | 0.3353 | 0.3443 | 0.3532 | 0.3625 | 0.3707 | 0.3794 | 0.3885 | 0.3973 | 0.4062 | 0.4151 | 0.4242 |  |
| Myanmar                                              | 0.2138 | 0.2263 | 0.2364 | 0.2451 | 0.2532 | 0.2609 | 0.2684 | 0.2756 | 0.2823 | 0.2886 | 0.2949 | 0.3015 | 0.3081 | 0.3147 | 0.3214 | 0.3278 | 0.3337 | 0.3388 | 0.3422 | 0.3457 |  |
| Philippines                                          | 0.3651 | 0.3746 | 0.3840 | 0.3937 | 0.4032 | 0.4123 | 0.4214 | 0.4304 | 0.4392 | 0.4478 | 0.4565 | 0.4652 | 0.4737 | 0.4819 | 0.4889 | 0.4946 | 0.4999 | 0.5049 | 0.5099 | 0.5148 |  |
| Sri Lanka                                            | 0.3723 | 0.3795 | 0.3872 | 0.3955 | 0.4037 | 0.4107 | 0.4158 | 0.4193 | 0.4221 | 0.4252 | 0.4297 | 0.4366 | 0.4447 | 0.4534 | 0.4629 | 0.4733 | 0.4836 | 0.4923 | 0.4997 | 0.5062 |  |

| Appendix Table 5A. SDI Values by location, 1970-1989 |        |        |        |        |        |        |        |        |        |        |        |        |        |        |        |        |        |        |        |        |  |
|------------------------------------------------------|--------|--------|--------|--------|--------|--------|--------|--------|--------|--------|--------|--------|--------|--------|--------|--------|--------|--------|--------|--------|--|
| Location                                             | 1970   | 1971   | 1972   | 1973   | 1974   | 1975   | 1976   | 1977   | 1978   | 1979   | 1980   | 1981   | 1982   | 1983   | 1984   | 1985   | 1986   | 1987   | 1988   | 1989   |  |
| Thailand                                             | 0.3055 | 0.3166 | 0.3278 | 0.3395 | 0.3512 | 0.3635 | 0.3771 | 0.3912 | 0.4059 | 0.4205 | 0.4348 | 0.4489 | 0.4623 | 0.4747 | 0.4864 | 0.4972 | 0.5073 | 0.5167 | 0.5259 | 0.5352 |  |
| Timor-Leste                                          | 0.1369 | 0.1478 | 0.1579 | 0.1678 | 0.1773 | 0.1862 | 0.1959 | 0.2057 | 0.2158 | 0.2260 | 0.2362 | 0.2448 | 0.2531 | 0.2613 | 0.2695 | 0.2777 | 0.2863 | 0.2952 | 0.3044 | 0.3138 |  |
| Vietnam                                              | 0.2908 | 0.2964 | 0.3022 | 0.3080 | 0.3137 | 0.3193 | 0.3259 | 0.3335 | 0.3407 | 0.3480 | 0.3540 | 0.3624 | 0.3697 | 0.3780 | 0.3866 | 0.3948 | 0.4027 | 0.4112 | 0.4206 | 0.4300 |  |
| Mauritius                                            | 0.4456 | 0.4521 | 0.4656 | 0.4731 | 0.4739 | 0.4840 | 0.4951 | 0.5033 | 0.5098 | 0.5198 | 0.5317 | 0.5458 | 0.5589 | 0.5690 | 0.5785 | 0.5866 | 0.5897 | 0.5911 | 0.5955 | 0.6022 |  |
| Seychelles                                           | 0.3200 | 0.3316 | 0.3475 | 0.3691 | 0.3968 | 0.4282 | 0.4538 | 0.4657 | 0.4715 | 0.4799 | 0.4922 | 0.5103 | 0.5241 | 0.5311 | 0.5383 | 0.5482 | 0.5601 | 0.5737 | 0.5856 | 0.5951 |  |
| Aceh                                                 | 0.2937 | 0.3068 | 0.3197 | 0.3326 | 0.3455 | 0.3581 | 0.3704 | 0.3825 | 0.3943 | 0.4060 | 0.4181 | 0.4305 | 0.4429 | 0.4557 | 0.4689 | 0.4816 | 0.4937 | 0.5053 | 0.5164 | 0.5269 |  |
| Sumatera Utara                                       | 0.2991 | 0.3098 | 0.3204 | 0.3315 | 0.3428 | 0.3537 | 0.3645 | 0.3753 | 0.3857 | 0.3962 | 0.4071 | 0.4183 | 0.4289 | 0.4394 | 0.4501 | 0.4601 | 0.4695 | 0.4779 | 0.4852 | 0.4922 |  |
| Sumatera Barat                                       | 0.2862 | 0.2959 | 0.3056 | 0.3159 | 0.3265 | 0.3366 | 0.3467 | 0.3569 | 0.3668 | 0.3767 | 0.3871 | 0.3977 | 0.4078 | 0.4181 | 0.4287 | 0.4388 | 0.4484 | 0.4577 | 0.4664 | 0.4748 |  |
| Riau                                                 | 0.3039 | 0.3180 | 0.3318 | 0.3453 | 0.3590 | 0.3724 | 0.3857 | 0.3990 | 0.4120 | 0.4248 | 0.4379 | 0.4515 | 0.4651 | 0.4791 | 0.4935 | 0.5074 | 0.5207 | 0.5332 | 0.5449 | 0.5559 |  |
| Jambi                                                | 0.2590 | 0.2676 | 0.2764 | 0.2861 | 0.2962 | 0.3058 | 0.3153 | 0.3250 | 0.3345 | 0.3443 | 0.3547 | 0.3656 | 0.3760 | 0.3866 | 0.3976 | 0.4082 | 0.4185 | 0.4284 | 0.4378 | 0.4470 |  |
| Sumatera Selatan                                     | 0.3192 | 0.3288 | 0.3384 | 0.3482 | 0.3583 | 0.3681 | 0.3779 | 0.3876 | 0.3970 | 0.4063 | 0.4160 | 0.4261 | 0.4357 | 0.4457 | 0.4561 | 0.4661 | 0.4759 | 0.4854 | 0.4945 | 0.5034 |  |
| Bengkulu                                             | 0.2419 | 0.2512 | 0.2615 | 0.2723 | 0.2836 | 0.2944 | 0.3052 | 0.3161 | 0.3266 | 0.3371 | 0.3479 | 0.3589 | 0.3694 | 0.3801 | 0.3913 | 0.4022 | 0.4130 | 0.4233 | 0.4331 | 0.4427 |  |
| Lampung                                              | 0.2407 | 0.2493 | 0.2588 | 0.2693 | 0.2804 | 0.2908 | 0.3013 | 0.3119 | 0.3223 | 0.3328 | 0.3439 | 0.3551 | 0.3654 | 0.3757 | 0.3861 | 0.3960 | 0.4053 | 0.4138 | 0.4215 | 0.4292 |  |
| Bangka Belitung                                      | 0.3066 | 0.3153 | 0.3242 | 0.3336 | 0.3433 | 0.3526 | 0.3618 | 0.3709 | 0.3799 | 0.3890 | 0.3984 | 0.4080 | 0.4174 | 0.4269 | 0.4369 | 0.4467 | 0.4564 | 0.4659 | 0.4748 | 0.4833 |  |
| Kepulauan Riau                                       | 0.3012 | 0.3150 | 0.3289 | 0.3429 | 0.3572 | 0.3713 | 0.3852 | 0.3989 | 0.4123 | 0.4256 | 0.4389 | 0.4531 | 0.4674 | 0.4823 | 0.4977 | 0.5129 | 0.5276 | 0.5416 | 0.5551 | 0.5681 |  |
| Kalimantan Utara                                     | 0.3214 | 0.3349 | 0.3481 | 0.3612 | 0.3746 | 0.3880 | 0.4014 | 0.4148 | 0.4280 | 0.4411 | 0.4547 | 0.4690 | 0.4833 | 0.4981 | 0.5130 | 0.5273 | 0.5411 | 0.5541 | 0.5661 | 0.5774 |  |
| Jakarta                                              | 0.4412 | 0.4520 | 0.4634 | 0.4752 | 0.4873 | 0.4988 | 0.5100 | 0.5213 | 0.5321 | 0.5430 | 0.5542 | 0.5656 | 0.5765 | 0.5874 | 0.5985 | 0.6090 | 0.6190 | 0.6286 | 0.6375 | 0.6461 |  |
| Jawa Barat                                           | 0.3152 | 0.3233 | 0.3315 | 0.3404 | 0.3498 | 0.3589 | 0.3681 | 0.3774 | 0.3867 | 0.3962 | 0.4061 | 0.4164 | 0.4263 | 0.4363 | 0.4465 | 0.4561 | 0.4653 | 0.4737 | 0.4812 | 0.4885 |  |
| Jawa Tengah                                          | 0.2676 | 0.2758 | 0.2844 | 0.2938 | 0.3037 | 0.3133 | 0.3230 | 0.3328 | 0.3426 | 0.3527 | 0.3632 | 0.3741 | 0.3844 | 0.3948 | 0.4054 | 0.4153 | 0.4247 | 0.4334 | 0.4415 | 0.4494 |  |
| Yogyakarta                                           | 0.2750 | 0.2849 | 0.2956 | 0.3073 | 0.3196 | 0.3315 | 0.3436 | 0.3559 | 0.3678 | 0.3800 | 0.3925 | 0.4052 | 0.4171 | 0.4286 | 0.4402 | 0.4512 | 0.4619 | 0.4718 | 0.4810 | 0.4900 |  |
| Jawa Timur                                           | 0.2906 | 0.2985 | 0.3067 | 0.3158 | 0.3255 | 0.3348 | 0.3443 | 0.3541 | 0.3637 | 0.3738 | 0.3843 | 0.3952 | 0.4056 | 0.4160 | 0.4266 | 0.4368 | 0.4467 | 0.4561 | 0.4648 | 0.4734 |  |
| Banten                                               | 0.3113 | 0.3197 | 0.3281 | 0.3367 | 0.3457 | 0.3544 | 0.3630 | 0.3717 | 0.3802 | 0.3890 | 0.3981 | 0.4079 | 0.4175 | 0.4278 | 0.4387 | 0.4491 | 0.4591 | 0.4685 | 0.4775 | 0.4864 |  |
| Bali                                                 | 0.2899 | 0.2989 | 0.3080 | 0.3179 | 0.3283 | 0.3386 | 0.3491 | 0.3600 | 0.3708 | 0.3821 | 0.3939 | 0.4063 | 0.4182 | 0.4302 | 0.4424 | 0.4542 | 0.4657 | 0.4765 | 0.4865 | 0.4963 |  |
| Nusa Tenggara Barat                                  | 0.1921 | 0.1997 | 0.2076 | 0.2168 | 0.2266 | 0.2358 | 0.2451 | 0.2548 | 0.2644 | 0.2745 | 0.2854 | 0.2967 | 0.3073 | 0.3177 | 0.3281 | 0.3377 | 0.3464 | 0.3540 | 0.3606 | 0.3673 |  |
| Nusa Tenggara Timur                                  | 0.2101 | 0.2178 | 0.2262 | 0.2359 | 0.2462 | 0.2556 | 0.2649 | 0.2742 | 0.2832 | 0.2922 | 0.3014 | 0.3106 | 0.3187 | 0.3268 | 0.3353 | 0.3434 | 0.3513 | 0.3588 | 0.3660 | 0.3732 |  |
| Kalimantan Barat                                     | 0.2272 | 0.2354 | 0.2437 | 0.2526 | 0.2619 | 0.2710 | 0.2803 | 0.2898 | 0.2993 | 0.3091 | 0.3194 | 0.3304 | 0.3414 | 0.3529 | 0.3650 | 0.3766 | 0.3876 | 0.3982 | 0.4085 | 0.4186 |  |
| Kalimantan Tengah                                    | 0.3115 | 0.3203 | 0.3299 | 0.3401 | 0.3508 | 0.3610 | 0.3709 | 0.3809 | 0.3905 | 0.4001 | 0.4099 | 0.4199 | 0.4293 | 0.4391 | 0.4493 | 0.4592 | 0.4690 | 0.4786 | 0.4878 | 0.4968 |  |
| Kalimantan Selatan                                   | 0.2992 | 0.3079 | 0.3169 | 0.3267 | 0.3370 | 0.3471 | 0.3573 | 0.3676 | 0.3778 | 0.3882 | 0.3990 | 0.4102 | 0.4209 | 0.4316 | 0.4424 | 0.4527 | 0.4626 | 0.4717 | 0.4798 | 0.4872 |  |
| Kalimantan Timur                                     | 0.3275 | 0.3411 | 0.3545 | 0.3682 | 0.3821 | 0.3958 | 0.4093 | 0.4227 | 0.4360 | 0.4494 | 0.4631 | 0.4776 | 0.4921 | 0.5068 | 0.5218 | 0.5363 | 0.5502 | 0.5633 | 0.5755 | 0.5868 |  |
| Sulawesi Utara                                       | 0.3454 | 0.3539 | 0.3625 | 0.3721 | 0.3821 | 0.3916 | 0.4010 | 0.4106 | 0.4200 | 0.4296 | 0.4397 | 0.4500 | 0.4595 | 0.4689 | 0.4783 | 0.4871 | 0.4954 | 0.5032 | 0.5102 | 0.5173 |  |
| Sulawesi Tengah                                      | 0.2603 | 0.2695 | 0.2794 | 0.2902 | 0.3014 | 0.3118 | 0.3221 | 0.3324 | 0.3423 | 0.3523 | 0.3626 | 0.3731 | 0.3826 | 0.3922 | 0.4021 | 0.4113 | 0.4202 | 0.4287 | 0.4366 | 0.4444 |  |
| Sulawesi Selatan                                     | 0.2529 | 0.2617 | 0.2709 | 0.2810 | 0.2915 | 0.3017 | 0.3120 | 0.3224 | 0.3328 | 0.3433 | 0.3544 | 0.3659 | 0.3767 | 0.3876 | 0.3986 | 0.4092 | 0.4195 | 0.4292 | 0.4382 | 0.4470 |  |
| Sulawesi Tenggara                                    | 0.2233 | 0.2325 | 0.2419 | 0.2521 | 0.2630 | 0.2734 | 0.2839 | 0.2947 | 0.3053 | 0.3161 | 0.3274 | 0.3391 | 0.3502 | 0.3614 | 0.3730 | 0.3842 | 0.3950 | 0.4050 | 0.4142 | 0.4233 |  |
| Gorontalo                                            | 0.2343 | 0.2420 | 0.2507 | 0.2607 | 0.2713 | 0.2809 | 0.2904 | 0.2999 | 0.3090 | 0.3183 | 0.3280 | 0.3375 | 0.3459 | 0.3540 | 0.3623 | 0.3701 | 0.3776 | 0.3848 | 0.3916 | 0.3989 |  |
| Sulawesi Barat                                       | 0.2325 | 0.2395 | 0.2470 | 0.2553 | 0.2642 | 0.2728 | 0.2815 | 0.2904 | 0.2994 | 0.3087 | 0.3184 | 0.3286 | 0.3384 | 0.3483 | 0.3585 | 0.3684 | 0.3781 | 0.3874 | 0.3963 | 0.4051 |  |
| Maluku                                               | 0.3580 | 0.3673 | 0.3764 | 0.3860 | 0.3957 | 0.4049 | 0.4137 | 0.4223 | 0.4302 | 0.4380 | 0.4455 | 0.4532 | 0.4603 | 0.4677 | 0.4756 | 0.4833 | 0.4910 | 0.4986 | 0.5058 | 0.5125 |  |
| Maluku Utara                                         | 0.2682 | 0.2769 | 0.2858 | 0.2955 | 0.3057 | 0.3154 | 0.3251 | 0.3348 | 0.3443 | 0.3538 | 0.3635 | 0.3736 | 0.3832 | 0.3932 | 0.4036 | 0.4135 | 0.4231 | 0.4322 | 0.4408 | 0.4492 |  |
| Papua Barat                                          | 0.3125 | 0.3216 | 0.3308 | 0.3405 | 0.3506 | 0.3602 | 0.3700 | 0.3802 | 0.3906 | 0.4016 | 0.4130 | 0.4249 | 0.4365 | 0.4483 | 0.4606 | 0.4725 | 0.4839 | 0.4947 | 0.5049 | 0.5148 |  |
| Papua                                                | 0.3701 | 0.3775 | 0.3846 | 0.3922 | 0.3999 | 0.4072 | 0.4143 | 0.4214 | 0.4283 | 0.4351 | 0.4424 | 0.4500 | 0.4574 | 0.4653 | 0.4736 | 0.4813 | 0.4882 | 0.4944 | 0.5000 | 0.5051 |  |
| Oceania                                              | 0.2806 | 0.2851 | 0.2896 | 0.2946 | 0.3001 | 0.3057 | 0.3112 | 0.3163 | 0.3214 | 0.3267 | 0.3320 | 0.3376 | 0.3429 | 0.3482 | 0.3534 | 0.3583 | 0.3632 | 0.3679 | 0.3727 | 0.3779 |  |
| Fiji                                                 | 0.4366 | 0.4446 | 0.4526 | 0.4613 | 0.4706 | 0.4799 | 0.4890 | 0.4980 | 0.5065 | 0.5156 | 0.5246 | 0.5336 | 0.5421 | 0.5497 | 0.5575 | 0.5647 | 0.5720 | 0.5785 | 0.5849 | 0.5919 |  |
| Kiribati                                             | 0.2146 | 0.2182 | 0.2212 | 0.2229 | 0.2260 | 0.2310 | 0.2360 | 0.2411 | 0.2467 | 0.2538 | 0.2606 | 0.2672 | 0.2734 | 0.2789 | 0.2838 | 0.2880 | 0.2922 | 0.2954 | 0.2993 | 0.3031 |  |
| Marshall Islands                                     | 0.3229 | 0.3296 | 0.3348 | 0.3421 | 0.3511 | 0.3597 | 0.3679 | 0.3758 | 0.3836 | 0.3917 | 0.3989 | 0.4061 | 0.4127 | 0.4196 | 0.4268 | 0.4324 | 0.4393 | 0.4462 | 0.4533 | 0.4596 |  |
| Federated States of Micronesia                       | 0.1044 | 0.1062 | 0.1202 | 0.1394 | 0.1620 | 0.1825 | 0.2026 | 0.2214 | 0.2393 | 0.2565 | 0.2741 | 0.2923 | 0.3104 | 0.3281 | 0.3456 | 0.3626 | 0.3790 | 0.3945 | 0.4088 | 0.4221 |  |
| Papua New Guinea                                     | 0.2175 | 0.2211 | 0.2247 | 0.2286 | 0.2328 | 0.2369 | 0.2408 | 0.2444 | 0.2482 | 0.2521 | 0.2559 | 0.2597 | 0.2632 | 0.2670 | 0.2706 | 0.2743 | 0.2783 | 0.2827 | 0.2872 | 0.2917 |  |
| Samoa                                                | 0.2867 | 0.2941 | 0.3011 | 0.3098 | 0.3191 | 0.3277 | 0.3368 | 0.3455 | 0.3536 | 0.3625 | 0.3717 | 0.3806 | 0.3891 | 0.3971 | 0.4048 | 0.4123 | 0.4200 | 0.4278 | 0.4353 | 0.4432 |  |
| Solomon Islands                                      | 0.2234 | 0.2272 | 0.2307 | 0.2343 | 0.2396 | 0.2437 | 0.2484 | 0.2533 | 0.2579 | 0.2639 | 0.2692 | 0.2746 | 0.2796 | 0.2844 | 0.2893 | 0.2940 | 0.2984 | 0.3031 | 0.3078 | 0.3128 |  |
| Tonga                                                | 0.3194 | 0.3259 | 0.3321 | 0.3385 | 0.3451 | 0.3517 | 0.3580 | 0.3644 | 0.3704 | 0.3757 | 0.3819 | 0.3890 | 0.3967 | 0.4031 | 0.4115 | 0.4195 | 0.4273 | 0.4349 | 0.4417 | 0.4482 |  |
| Vanuatu                                              | 0.2240 | 0.2286 | 0.2326 | 0.2364 | 0.2424 | 0.2481 | 0.2538 | 0.2589 | 0.2644 | 0.2707 | 0.2765 | 0.2825 | 0.2882 | 0.2938 | 0.2997 | 0.3056 | 0.3117 | 0.3178 | 0.3235 | 0.3290 |  |

| Appendix Table 5A. SDI Values by location, 1970-1989 |        |        |        |        |        |        |        |        |        |        |        |        |        |        |        |        |        |        |        |        |  |
|------------------------------------------------------|--------|--------|--------|--------|--------|--------|--------|--------|--------|--------|--------|--------|--------|--------|--------|--------|--------|--------|--------|--------|--|
| Location                                             | 1970   | 1971   | 1972   | 1973   | 1974   | 1975   | 1976   | 1977   | 1978   | 1979   | 1980   | 1981   | 1982   | 1983   | 1984   | 1985   | 1986   | 1987   | 1988   | 1989   |  |
| American Samoa                                       | 0.4512 | 0.4610 | 0.4709 | 0.4814 | 0.4923 | 0.5022 | 0.5120 | 0.5218 | 0.5316 | 0.5412 | 0.5506 | 0.5606 | 0.5691 | 0.5763 | 0.5830 | 0.5893 | 0.5954 | 0.6011 | 0.6064 | 0.6116 |  |
| Guam                                                 | 0.6312 | 0.6400 | 0.6484 | 0.6571 | 0.6662 | 0.6751 | 0.6839 | 0.6924 | 0.7009 | 0.7093 | 0.7178 | 0.7260 | 0.7329 | 0.7384 | 0.7419 | 0.7430 | 0.7427 | 0.7434 | 0.7460 | 0.7504 |  |
| Northern Mariana Islands                             | 0.5021 | 0.5124 | 0.5220 | 0.5319 | 0.5428 | 0.5543 | 0.5662 | 0.5775 | 0.5882 | 0.5988 | 0.6104 | 0.6219 | 0.6328 | 0.6430 | 0.6527 | 0.6623 | 0.6712 | 0.6801 | 0.6886 | 0.6970 |  |
| Central Europe, Eastern Europe, and Central Asia     | 0.6597 | 0.6642 | 0.6690 | 0.6732 | 0.6772 | 0.6822 | 0.6876 | 0.6928 | 0.6977 | 0.7019 | 0.7057 | 0.7083 | 0.7097 | 0.7113 | 0.7139 | 0.7159 | 0.7175 | 0.7209 | 0.7265 | 0.7329 |  |
| Central Asia                                         | 0.4934 | 0.5023 | 0.5107 | 0.5197 | 0.5288 | 0.5374 | 0.5459 | 0.5542 | 0.5622 | 0.5695 | 0.5761 | 0.5818 | 0.5865 | 0.5907 | 0.5945 | 0.5980 | 0.6023 | 0.6071 | 0.6124 | 0.6182 |  |
| Armenia                                              | 0.5278 | 0.5374 | 0.5459 | 0.5552 | 0.5640 | 0.5717 | 0.5791 | 0.5859 | 0.5923 | 0.5979 | 0.6025 | 0.6065 | 0.6104 | 0.6146 | 0.6186 | 0.6221 | 0.6263 | 0.6307 | 0.6353 | 0.6400 |  |
| Azerbaijan                                           | 0.4966 | 0.5075 | 0.5179 | 0.5295 | 0.5412 | 0.5522 | 0.5634 | 0.5746 | 0.5857 | 0.5962 | 0.6057 | 0.6144 | 0.6223 | 0.6299 | 0.6367 | 0.6425 | 0.6485 | 0.6539 | 0.6590 | 0.6640 |  |
| Georgia                                              | 0.6176 | 0.6238 | 0.6296 | 0.6363 | 0.6431 | 0.6493 | 0.6559 | 0.6624 | 0.6687 | 0.6743 | 0.6792 | 0.6835 | 0.6875 | 0.6914 | 0.6950 | 0.6983 | 0.7021 | 0.7060 | 0.7103 | 0.7150 |  |
| Kazakhstan                                           | 0.5381 | 0.5481 | 0.5576 | 0.5676 | 0.5775 | 0.5870 | 0.5964 | 0.6055 | 0.6142 | 0.6222 | 0.6295 | 0.6357 | 0.6408 | 0.6453 | 0.6495 | 0.6535 | 0.6581 | 0.6632 | 0.6689 | 0.6751 |  |
| Kyrgyzstan                                           | 0.4575 | 0.4682 | 0.4786 | 0.4893 | 0.4999 | 0.5102 | 0.5204 | 0.5302 | 0.5396 | 0.5482 | 0.5559 | 0.5622 | 0.5670 | 0.5711 | 0.5747 | 0.5781 | 0.5820 | 0.5866 | 0.5919 | 0.5977 |  |
| Mongolia                                             | 0.2833 | 0.2972 | 0.3105 | 0.3233 | 0.3354 | 0.3471 | 0.3583 | 0.3693 | 0.3800 | 0.3905 | 0.4030 | 0.4169 | 0.4309 | 0.4446 | 0.4582 | 0.4726 | 0.4888 | 0.5057 | 0.5225 | 0.5389 |  |
| Tajikistan                                           | 0.3465 | 0.3584 | 0.3702 | 0.3825 | 0.3951 | 0.4074 | 0.4194 | 0.4311 | 0.4423 | 0.4526 | 0.4617 | 0.4689 | 0.4739 | 0.4777 | 0.4809 | 0.4841 | 0.4882 | 0.4939 | 0.5013 | 0.5100 |  |
| Turkmenistan                                         | 0.4469 | 0.4550 | 0.4629 | 0.4713 | 0.4801 | 0.4888 | 0.4976 | 0.5062 | 0.5147 | 0.5228 | 0.5301 | 0.5362 | 0.5410 | 0.5450 | 0.5484 | 0.5517 | 0.5553 | 0.5596 | 0.5647 | 0.5705 |  |
| Uzbekistan                                           | 0.4057 | 0.4148 | 0.4236 | 0.4329 | 0.4423 | 0.4515 | 0.4606 | 0.4694 | 0.4778 | 0.4856 | 0.4926 | 0.4984 | 0.5027 | 0.5064 | 0.5098 | 0.5134 | 0.5179 | 0.5233 | 0.5296 | 0.5366 |  |
| Central Europe                                       | 0.6527 | 0.6584 | 0.6632 | 0.6651 | 0.6678 | 0.6732 | 0.6788 | 0.6847 | 0.6900 | 0.6953 | 0.7007 | 0.7051 | 0.7086 | 0.7112 | 0.7134 | 0.7165 | 0.7203 | 0.7244 | 0.7294 | 0.7356 |  |
| Albania                                              | 0.4808 | 0.4876 | 0.4942 | 0.5006 | 0.5067 | 0.5127 | 0.5185 | 0.5241 | 0.5296 | 0.5350 | 0.5402 | 0.5455 | 0.5505 | 0.5554 | 0.5601 | 0.5642 | 0.5687 | 0.5729 | 0.5766 | 0.5810 |  |
| Bosnia and Herzegovina                               | 0.4186 | 0.4273 | 0.4361 | 0.4447 | 0.4537 | 0.4625 | 0.4707 | 0.4794 | 0.4877 | 0.4956 | 0.5024 | 0.5085 | 0.5136 | 0.5179 | 0.5222 | 0.5270 | 0.5319 | 0.5355 | 0.5393 | 0.5424 |  |
| Bulgaria                                             | 0.6491 | 0.6568 | 0.6608 | 0.6611 | 0.6645 | 0.6709 | 0.6769 | 0.6837 | 0.6898 | 0.6969 | 0.7045 | 0.7103 | 0.7149 | 0.7195 | 0.7245 | 0.7284 | 0.7328 | 0.7382 | 0.7444 | 0.7521 |  |
| Croatia                                              | 0.6904 | 0.6966 | 0.7024 | 0.7079 | 0.7137 | 0.7192 | 0.7244 | 0.7299 | 0.7355 | 0.7410 | 0.7459 | 0.7506 | 0.7548 | 0.7586 | 0.7627 | 0.7672 | 0.7717 | 0.7755 | 0.7789 | 0.7822 |  |
| Czech Republic                                       | 0.7561 | 0.7570 | 0.7541 | 0.7492 | 0.7505 | 0.7559 | 0.7613 | 0.7652 | 0.7684 | 0.7769 | 0.7863 | 0.7903 | 0.7935 | 0.7963 | 0.7978 | 0.8002 | 0.8032 | 0.8045 | 0.8071 | 0.8099 |  |
| Hungary                                              | 0.6617 | 0.6673 | 0.6711 | 0.6690 | 0.6654 | 0.6701 | 0.6790 | 0.6876 | 0.6957 | 0.7036 | 0.7114 | 0.7191 | 0.7266 | 0.7316 | 0.7334 | 0.7350 | 0.7390 | 0.7437 | 0.7479 | 0.7507 |  |
| Macedonia                                            | 0.5953 | 0.6044 | 0.6127 | 0.6204 | 0.6275 | 0.6342 | 0.6406 | 0.6469 | 0.6530 | 0.6589 | 0.6641 | 0.6690 | 0.6735 | 0.6774 | 0.6815 | 0.6856 | 0.6905 | 0.6954 | 0.6997 | 0.7024 |  |
| Montenegro                                           | 0.6755 | 0.6814 | 0.6873 | 0.6932 | 0.6989 | 0.7039 | 0.7087 | 0.7132 | 0.7174 | 0.7213 | 0.7249 | 0.7284 | 0.7315 | 0.7343 | 0.7370 | 0.7395 | 0.7418 | 0.7439 | 0.7460 | 0.7481 |  |
| Poland                                               | 0.6616 | 0.6650 | 0.6694 | 0.6733 | 0.6775 | 0.6813 | 0.6867 | 0.6929 | 0.6967 | 0.6992 | 0.7021 | 0.7022 | 0.6991 | 0.6994 | 0.7028 | 0.7083 | 0.7143 | 0.7189 | 0.7240 | 0.7304 |  |
| Romania                                              | 0.5865 | 0.5985 | 0.6091 | 0.6112 | 0.6133 | 0.6232 | 0.6302 | 0.6372 | 0.6456 | 0.6532 | 0.6608 | 0.6716 | 0.6842 | 0.6883 | 0.6874 | 0.6880 | 0.6889 | 0.6947 | 0.7028 | 0.7155 |  |
| Serbia                                               | 0.6458 | 0.6494 | 0.6528 | 0.6561 | 0.6593 | 0.6623 | 0.6656 | 0.6690 | 0.6722 | 0.6752 | 0.6779 | 0.6800 | 0.6815 | 0.6828 | 0.6844 | 0.6864 | 0.6887 | 0.6912 | 0.6941 | 0.6972 |  |
| Slovakia                                             | 0.7011 | 0.7046 | 0.7062 | 0.7084 | 0.7133 | 0.7190 | 0.7245 | 0.7297 | 0.7345 | 0.7415 | 0.7486 | 0.7531 | 0.7562 | 0.7591 | 0.7620 | 0.7658 | 0.7703 | 0.7741 | 0.7779 | 0.7814 |  |
| Slovenia                                             | 0.7116 | 0.7174 | 0.7224 | 0.7273 | 0.7323 | 0.7370 | 0.7414 | 0.7464 | 0.7520 | 0.7588 | 0.7660 | 0.7739 | 0.7819 | 0.7886 | 0.7931 | 0.7974 | 0.8010 | 0.8034 | 0.8079 | 0.8126 |  |
| Eastern Europe                                       | 0.6910 | 0.6950 | 0.6999 | 0.7052 | 0.7097 | 0.7146 | 0.7199 | 0.7249 | 0.7297 | 0.7336 | 0.7366 | 0.7383 | 0.7381 | 0.7391 | 0.7420 | 0.7434 | 0.7436 | 0.7467 | 0.7532 | 0.7603 |  |
| Belarus                                              | 0.6529 | 0.6577 | 0.6628 | 0.6687 | 0.6747 | 0.6802 | 0.6856 | 0.6907 | 0.6955 | 0.6997 | 0.7032 | 0.7060 | 0.7083 | 0.7106 | 0.7131 | 0.7157 | 0.7189 | 0.7227 | 0.7275 | 0.7330 |  |
| Estonia                                              | 0.7375 | 0.7417 | 0.7478 | 0.7534 | 0.7579 | 0.7613 | 0.7643 | 0.7682 | 0.7723 | 0.7747 | 0.7754 | 0.7758 | 0.7756 | 0.7757 | 0.7786 | 0.7804 | 0.7790 | 0.7781 | 0.7809 | 0.7881 |  |
| Latvia                                               | 0.7169 | 0.7211 | 0.7255 | 0.7307 | 0.7360 | 0.7409 | 0.7461 | 0.7508 | 0.7547 | 0.7574 | 0.7589 | 0.7591 | 0.7585 | 0.7582 | 0.7590 | 0.7600 | 0.7619 | 0.7652 | 0.7702 | 0.7763 |  |
| Lithuania                                            | 0.7130 | 0.7185 | 0.7262 | 0.7336 | 0.7389 | 0.7431 | 0.7479 | 0.7533 | 0.7589 | 0.7640 | 0.7683 | 0.7710 | 0.7715 | 0.7721 | 0.7743 | 0.7758 | 0.7773 | 0.7814 | 0.7872 | 0.7902 |  |
| Moldova                                              | 0.5634 | 0.5691 | 0.5743 | 0.5800 | 0.5857 | 0.5910 | 0.5965 | 0.6017 | 0.6067 | 0.6109 | 0.6143 | 0.6169 | 0.6189 | 0.6207 | 0.6226 | 0.6247 | 0.6277 | 0.6316 | 0.6362 | 0.6414 |  |
| Russia                                               | 0.7008 | 0.7044 | 0.7094 | 0.7145 | 0.7186 | 0.7233 | 0.7286 | 0.7336 | 0.7383 | 0.7421 | 0.7448 | 0.7460 | 0.7448 | 0.7453 | 0.7485 | 0.7494 | 0.7481 | 0.7507 | 0.7579 | 0.7657 |  |
| Ukraine                                              | 0.6630 | 0.6678 | 0.6726 | 0.6781 | 0.6836 | 0.6888 | 0.6942 | 0.6994 | 0.7042 | 0.7085 | 0.7122 | 0.7150 | 0.7171 | 0.7191 | 0.7213 | 0.7239 | 0.7272 | 0.7314 | 0.7366 | 0.7424 |  |
| High-income                                          | 0.7084 | 0.7170 | 0.7262 | 0.7343 | 0.7420 | 0.7488 | 0.7544 | 0.7598 | 0.7643 | 0.7682 | 0.7729 | 0.7777 | 0.7824 | 0.7873 | 0.7914 | 0.7954 | 0.7994 | 0.8027 | 0.8058 | 0.8090 |  |
| High-income Asia Pacific                             | 0.6613 | 0.6680 | 0.6762 | 0.6868 | 0.6987 | 0.7097 | 0.7190 | 0.7275 | 0.7331 | 0.7381 | 0.7446 | 0.7504 | 0.7562 | 0.7629 | 0.7694 | 0.7754 | 0.7812 | 0.7865 | 0.7928 | 0.7995 |  |
| Brunei                                               | 0.5876 | 0.5947 | 0.6020 | 0.6095 | 0.6173 | 0.6253 | 0.6345 | 0.6441 | 0.6541 | 0.6642 | 0.6736 | 0.6807 | 0.6873 | 0.6937 | 0.7000 | 0.7062 | 0.7132 | 0.7209 | 0.7288 | 0.7367 |  |
| Japan                                                | 0.7039 | 0.7101 | 0.7172 | 0.7261 | 0.7370 | 0.7469 | 0.7542 | 0.7596 | 0.7647 | 0.7703 | 0.7755 | 0.7792 | 0.7814 | 0.7838 | 0.7879 | 0.7931 | 0.7982 | 0.8034 | 0.8099 | 0.8166 |  |
| South Korea                                          | 0.4634 | 0.4758 | 0.4913 | 0.5098 | 0.5286 | 0.5472 | 0.5671 | 0.5889 | 0.5995 | 0.6058 | 0.6176 | 0.6313 | 0.6488 | 0.6686 | 0.6836 | 0.6935 | 0.7042 | 0.7140 | 0.7227 | 0.7315 |  |
| Singapore                                            | 0.5537 | 0.5611 | 0.5730 | 0.5948 | 0.6164 | 0.6281 | 0.6398 | 0.6525 | 0.6602 | 0.6682 | 0.6779 | 0.6859 | 0.6954 | 0.7044 | 0.7112 | 0.7171 | 0.7181 | 0.7111 | 0.7191 | 0.7340 |  |
| Hokkaido                                             | 0.6991 | 0.7055 | 0.7127 | 0.7216 | 0.7321 | 0.7417 | 0.7489 | 0.7545 | 0.7598 | 0.7655 | 0.7710 | 0.7750 | 0.7776 | 0.7803 | 0.7844 | 0.7895 | 0.7943 | 0.7991 | 0.8044 | 0.8088 |  |
| Aomori                                               | 0.6863 | 0.6925 | 0.6996 | 0.7085 | 0.7195 | 0.7296 | 0.7371 | 0.7429 | 0.7483 | 0.7542 | 0.7599 | 0.7639 | 0.7662 | 0.7686 | 0.7728 | 0.7784 | 0.7837 | 0.7891 | 0.7954 | 0.8012 |  |
| Iwate                                                | 0.6780 | 0.6839 | 0.6909 | 0.6998 | 0.7110 | 0.7213 | 0.7288 | 0.7345 | 0.7398 | 0.7458 | 0.7516 | 0.7558 | 0.7584 | 0.7611 | 0.7655 | 0.7709 | 0.7758 | 0.7804 | 0.7862 | 0.7920 |  |
| Miyagi                                               | 0.6883 | 0.6945 | 0.7017 | 0.7107 | 0.7219 | 0.7322 | 0.7398 | 0.7456 | 0.7511 | 0.7572 | 0.7631 | 0.7674 | 0.7703 | 0.7733 | 0.7779 | 0.7834 | 0.7887 | 0.7939 | 0.8004 | 0.8071 |  |
| Akita                                                | 0.6865 | 0.6927 | 0.6997 | 0.7085 | 0.7192 | 0.7291 | 0.7364 | 0.7421 | 0.7475 | 0.7534 | 0.7592 | 0.7635 | 0.7661 | 0.7688 | 0.7728 | 0.7778 | 0.7823 | 0.7866 | 0.7921 | 0.7976 |  |
| Yamagata                                             | 0.6759 | 0.6819 | 0.6888 | 0.6977 | 0.7089 | 0.7191 | 0.7267 | 0.7326 | 0.7381 | 0.7442 | 0.7502 | 0.7547 | 0.7574 | 0.7599 | 0.7637 | 0.7683 | 0.7725 | 0.7767 | 0.7825 | 0.7885 |  |
| Fukushima                                            | 0.6799 | 0.6859 | 0.6930 | 0.7021 | 0.7136 | 0.7242 | 0.7319 | 0.7377 | 0.7431 | 0.7491 | 0.7548 | 0.7587 | 0.7610 | 0.7633 | 0.7676 | 0.7731 | 0.7782 | 0.7832 | 0.7896 | 0.7958 |  |

Appendix Table 5A. SDI Values by location, 1970-1989

| Location       | 1970   | 1971   | 1972   | 1973   | 1974   | 1975   | 1976   | 1977   | 1978   | 1979   | 1980   | 1981   | 1982   | 1983   | 1984   | 1985   | 1986   | 1987   | 1988   | 1989   |
|----------------|--------|--------|--------|--------|--------|--------|--------|--------|--------|--------|--------|--------|--------|--------|--------|--------|--------|--------|--------|--------|
| Ibaraki        | 0.6929 | 0.6990 | 0.7062 | 0.7153 | 0.7267 | 0.7372 | 0.7449 | 0.7508 | 0.7563 | 0.7623 | 0.7681 | 0.7721 | 0.7745 | 0.7771 | 0.7814 | 0.7869 | 0.7921 | 0.7974 | 0.8041 | 0.8109 |
| Tochigi        | 0.6962 | 0.7025 | 0.7098 | 0.7191 | 0.7306 | 0.7411 | 0.7488 | 0.7547 | 0.7600 | 0.7657 | 0.7709 | 0.7742 | 0.7759 | 0.7777 | 0.7816 | 0.7870 | 0.7922 | 0.7976 | 0.8046 | 0.8117 |
| Gunma          | 0.6938 | 0.6999 | 0.7070 | 0.7161 | 0.7272 | 0.7374 | 0.7449 | 0.7505 | 0.7558 | 0.7615 | 0.7669 | 0.7707 | 0.7729 | 0.7752 | 0.7791 | 0.7843 | 0.7892 | 0.7940 | 0.8004 | 0.8070 |
| Saitama        | 0.6930 | 0.6991 | 0.7061 | 0.7150 | 0.7258 | 0.7355 | 0.7425 | 0.7478 | 0.7528 | 0.7582 | 0.7633 | 0.7669 | 0.7691 | 0.7716 | 0.7757 | 0.7809 | 0.7860 | 0.7911 | 0.7976 | 0.8043 |
| Chiba          | 0.6951 | 0.7014 | 0.7087 | 0.7179 | 0.7289 | 0.7388 | 0.7461 | 0.7515 | 0.7565 | 0.7617 | 0.7665 | 0.7695 | 0.7713 | 0.7737 | 0.7783 | 0.7842 | 0.7900 | 0.7958 | 0.8029 | 0.8099 |
| Tokyo          | 0.7595 | 0.7657 | 0.7728 | 0.7813 | 0.7914 | 0.8007 | 0.8074 | 0.8120 | 0.8163 | 0.8204 | 0.8244 | 0.8283 | 0.8319 | 0.8352 | 0.8385 | 0.8420 | 0.8455 | 0.8492 | 0.8533 | 0.8576 |
| Kanagawa       | 0.7057 | 0.7117 | 0.7187 | 0.7275 | 0.7382 | 0.7479 | 0.7548 | 0.7600 | 0.7648 | 0.7702 | 0.7753 | 0.7791 | 0.7814 | 0.7839 | 0.7880 | 0.7930 | 0.7980 | 0.8030 | 0.8096 | 0.8166 |
| Niigata        | 0.6876 | 0.6936 | 0.7006 | 0.7096 | 0.7208 | 0.7311 | 0.7386 | 0.7443 | 0.7497 | 0.7556 | 0.7612 | 0.7653 | 0.7676 | 0.7698 | 0.7735 | 0.7784 | 0.7830 | 0.7876 | 0.7937 | 0.8001 |
| Toyama         | 0.6994 | 0.7055 | 0.7126 | 0.7216 | 0.7325 | 0.7426 | 0.7498 | 0.7553 | 0.7604 | 0.7659 | 0.7709 | 0.7743 | 0.7761 | 0.7781 | 0.7820 | 0.7872 | 0.7924 | 0.7977 | 0.8045 | 0.8114 |
| Ishikawa       | 0.6929 | 0.6988 | 0.7059 | 0.7149 | 0.7260 | 0.7362 | 0.7437 | 0.7493 | 0.7546 | 0.7605 | 0.7662 | 0.7704 | 0.7729 | 0.7757 | 0.7801 | 0.7856 | 0.7906 | 0.7955 | 0.8020 | 0.8088 |
| Fukui          | 0.6905 | 0.6965 | 0.7037 | 0.7129 | 0.7244 | 0.7350 | 0.7426 | 0.7483 | 0.7535 | 0.7592 | 0.7645 | 0.7681 | 0.7698 | 0.7718 | 0.7757 | 0.7810 | 0.7860 | 0.7910 | 0.7976 | 0.8044 |
| Yamanashi      | 0.6892 | 0.6956 | 0.7030 | 0.7122 | 0.7233 | 0.7335 | 0.7410 | 0.7468 | 0.7522 | 0.7580 | 0.7634 | 0.7674 | 0.7696 | 0.7718 | 0.7755 | 0.7804 | 0.7851 | 0.7899 | 0.7962 | 0.8025 |
| Nagano         | 0.6875 | 0.6934 | 0.7003 | 0.7092 | 0.7203 | 0.7305 | 0.7378 | 0.7435 | 0.7489 | 0.7549 | 0.7607 | 0.7652 | 0.7678 | 0.7703 | 0.7741 | 0.7788 | 0.7832 | 0.7877 | 0.7936 | 0.7998 |
| Gifu           | 0.6909 | 0.6971 | 0.7043 | 0.7133 | 0.7244 | 0.7344 | 0.7418 | 0.7474 | 0.7527 | 0.7584 | 0.7639 | 0.7677 | 0.7699 | 0.7721 | 0.7761 | 0.7815 | 0.7866 | 0.7919 | 0.7986 | 0.8055 |
| Shizuoka       | 0.7047 | 0.7108 | 0.7180 | 0.7270 | 0.7382 | 0.7484 | 0.7558 | 0.7612 | 0.7663 | 0.7716 | 0.7766 | 0.7798 | 0.7815 | 0.7834 | 0.7874 | 0.7927 | 0.7978 | 0.8030 | 0.8099 | 0.8170 |
| Aichi          | 0.7152 | 0.7211 | 0.7280 | 0.7368 | 0.7479 | 0.7579 | 0.7651 | 0.7705 | 0.7755 | 0.7810 | 0.7862 | 0.7897 | 0.7916 | 0.7936 | 0.7974 | 0.8027 | 0.8079 | 0.8134 | 0.8204 | 0.8275 |
| Mie            | 0.6966 | 0.7028 | 0.7099 | 0.7190 | 0.7301 | 0.7403 | 0.7477 | 0.7533 | 0.7586 | 0.7643 | 0.7697 | 0.7735 | 0.7757 | 0.7780 | 0.7822 | 0.7877 | 0.7930 | 0.7984 | 0.8052 | 0.8122 |
| Shiga          | 0.6939 | 0.6999 | 0.7072 | 0.7165 | 0.7283 | 0.7391 | 0.7469 | 0.7528 | 0.7583 | 0.7642 | 0.7697 | 0.7732 | 0.7748 | 0.7768 | 0.7809 | 0.7866 | 0.7922 | 0.7978 | 0.8051 | 0.8125 |
| Kyoto          | 0.7037 | 0.7100 | 0.7173 | 0.7264 | 0.7372 | 0.7470 | 0.7542 | 0.7598 | 0.7650 | 0.7705 | 0.7756 | 0.7790 | 0.7809 | 0.7829 | 0.7868 | 0.7921 | 0.7974 | 0.8029 | 0.8097 | 0.8157 |
| Osaka          | 0.7190 | 0.7249 | 0.7318 | 0.7406 | 0.7512 | 0.7608 | 0.7677 | 0.7729 | 0.7777 | 0.7830 | 0.7879 | 0.7913 | 0.7932 | 0.7952 | 0.7990 | 0.8040 | 0.8090 | 0.8143 | 0.8211 | 0.8269 |
| Hyogo          | 0.6936 | 0.6997 | 0.7069 | 0.7159 | 0.7268 | 0.7367 | 0.7438 | 0.7492 | 0.7542 | 0.7597 | 0.7647 | 0.7683 | 0.7704 | 0.7728 | 0.7771 | 0.7827 | 0.7883 | 0.7938 | 0.8008 | 0.8078 |
| Nara           | 0.6761 | 0.6828 | 0.6905 | 0.6999 | 0.7108 | 0.7208 | 0.7282 | 0.7339 | 0.7391 | 0.7445 | 0.7494 | 0.7526 | 0.7544 | 0.7569 | 0.7616 | 0.7675 | 0.7733 | 0.7789 | 0.7858 | 0.7923 |
| Wakayama       | 0.6847 | 0.6909 | 0.6980 | 0.7069 | 0.7179 | 0.7280 | 0.7353 | 0.7408 | 0.7460 | 0.7516 | 0.7569 | 0.7607 | 0.7630 | 0.7656 | 0.7699 | 0.7755 | 0.7810 | 0.7865 | 0.7934 | 0.8003 |
| Tottori        | 0.6717 | 0.6779 | 0.6851 | 0.6943 | 0.7058 | 0.7164 | 0.7241 | 0.7300 | 0.7354 | 0.7414 | 0.7470 | 0.7508 | 0.7528 | 0.7550 | 0.7590 | 0.7642 | 0.7690 | 0.7737 | 0.7798 | 0.7861 |
| Shimane        | 0.6683 | 0.6742 | 0.6812 | 0.6903 | 0.7019 | 0.7126 | 0.7204 | 0.7262 | 0.7317 | 0.7378 | 0.7436 | 0.7476 | 0.7499 | 0.7521 | 0.7561 | 0.7612 | 0.7659 | 0.7705 | 0.7768 | 0.7832 |
| Okayama        | 0.6885 | 0.6946 | 0.7018 | 0.7109 | 0.7222 | 0.7325 | 0.7400 | 0.7456 | 0.7508 | 0.7565 | 0.7617 | 0.7653 | 0.7672 | 0.7693 | 0.7734 | 0.7789 | 0.7842 | 0.7897 | 0.7966 | 0.8036 |
| Hiroshima      | 0.6977 | 0.7036 | 0.7107 | 0.7197 | 0.7309 | 0.7410 | 0.7484 | 0.7539 | 0.7590 | 0.7646 | 0.7698 | 0.7733 | 0.7752 | 0.7772 | 0.7812 | 0.7866 | 0.7919 | 0.7972 | 0.8040 | 0.8108 |
| Yamaguchi      | 0.6952 | 0.7012 | 0.7082 | 0.7172 | 0.7281 | 0.7381 | 0.7455 | 0.7510 | 0.7562 | 0.7618 | 0.7671 | 0.7707 | 0.7728 | 0.7750 | 0.7789 | 0.7842 | 0.7893 | 0.7946 | 0.8012 | 0.8078 |
| Tokushima      | 0.6875 | 0.6939 | 0.7011 | 0.7102 | 0.7213 | 0.7314 | 0.7390 | 0.7448 | 0.7502 | 0.7560 | 0.7615 | 0.7654 | 0.7677 | 0.7702 | 0.7744 | 0.7797 | 0.7848 | 0.7900 | 0.7964 | 0.8030 |
| Kagawa         | 0.6908 | 0.6968 | 0.7039 | 0.7129 | 0.7240 | 0.7341 | 0.7416 | 0.7472 | 0.7526 | 0.7584 | 0.7641 | 0.7680 | 0.7703 | 0.7725 | 0.7762 | 0.7812 | 0.7860 | 0.7912 | 0.7979 | 0.8049 |
| Ehime          | 0.6838 | 0.6900 | 0.6971 | 0.7060 | 0.7170 | 0.7271 | 0.7345 | 0.7402 | 0.7455 | 0.7514 | 0.7571 | 0.7613 | 0.7640 | 0.7668 | 0.7710 | 0.7762 | 0.7811 | 0.7860 | 0.7923 | 0.7986 |
| Kochi          | 0.6730 | 0.6797 | 0.6873 | 0.6966 | 0.7076 | 0.7176 | 0.7251 | 0.7309 | 0.7360 | 0.7414 | 0.7462 | 0.7492 | 0.7509 | 0.7530 | 0.7572 | 0.7628 | 0.7683 | 0.7737 | 0.7803 | 0.7867 |
| Fukuoka        | 0.6961 | 0.7025 | 0.7098 | 0.7189 | 0.7299 | 0.7399 | 0.7473 | 0.7530 | 0.7583 | 0.7640 | 0.7694 | 0.7730 | 0.7752 | 0.7775 | 0.7816 | 0.7870 | 0.7924 | 0.7977 | 0.8043 | 0.8107 |
| Saga           | 0.6754 | 0.6817 | 0.6890 | 0.6982 | 0.7096 | 0.7201 | 0.7280 | 0.7339 | 0.7395 | 0.7456 | 0.7514 | 0.7553 | 0.7575 | 0.7598 | 0.7639 | 0.7694 | 0.7746 | 0.7799 | 0.7865 | 0.7929 |
| Nagasaki       | 0.6751 | 0.6815 | 0.6888 | 0.6979 | 0.7092 | 0.7195 | 0.7271 | 0.7330 | 0.7383 | 0.7441 | 0.7494 | 0.7530 | 0.7551 | 0.7573 | 0.7615 | 0.7670 | 0.7722 | 0.7772 | 0.7835 | 0.7895 |
| Kumamoto       | 0.6747 | 0.6811 | 0.6884 | 0.6976 | 0.7088 | 0.7190 | 0.7267 | 0.7327 | 0.7383 | 0.7443 | 0.7501 | 0.7541 | 0.7566 | 0.7590 | 0.7629 | 0.7682 | 0.7731 | 0.7781 | 0.7844 | 0.7907 |
| Oita           | 0.6868 | 0.6929 | 0.6999 | 0.7088 | 0.7198 | 0.7299 | 0.7374 | 0.7432 | 0.7487 | 0.7547 | 0.7607 | 0.7651 | 0.7680 | 0.7709 | 0.7751 | 0.7802 | 0.7848 | 0.7894 | 0.7954 | 0.8015 |
| Miyazaki       | 0.6737 | 0.6798 | 0.6869 | 0.6960 | 0.7074 | 0.7178 | 0.7256 | 0.7314 | 0.7369 | 0.7429 | 0.7486 | 0.7525 | 0.7549 | 0.7575 | 0.7619 | 0.7675 | 0.7726 | 0.7775 | 0.7838 | 0.7899 |
| Kagoshima      | 0.6672 | 0.6736 | 0.6809 | 0.6902 | 0.7017 | 0.7123 | 0.7203 | 0.7264 | 0.7321 | 0.7383 | 0.7442 | 0.7483 | 0.7510 | 0.7540 | 0.7589 | 0.7650 | 0.7703 | 0.7754 | 0.7818 | 0.7882 |
| Okinawa        | 0.6511 | 0.6568 | 0.6637 | 0.6730 | 0.6856 | 0.6972 | 0.7055 | 0.7116 | 0.7173 | 0.7237 | 0.7300 | 0.7342 | 0.7363 | 0.7385 | 0.7431 | 0.7496 | 0.7557 | 0.7618 | 0.7694 | 0.7767 |
| Australasia    | 0.7137 | 0.7199 | 0.7333 | 0.7460 | 0.7568 | 0.7657 | 0.7716 | 0.7766 | 0.7812 | 0.7848 | 0.7873 | 0.7897 | 0.7927 | 0.7964 | 0.7992 | 0.8016 | 0.8051 | 0.8084 | 0.8111 | 0.8129 |
| Australia      | 0.7139 | 0.7201 | 0.7336 | 0.7463 | 0.7569 | 0.7657 | 0.7716 | 0.7765 | 0.7812 | 0.7852 | 0.7874 | 0.7894 | 0.7922 | 0.7962 | 0.7991 | 0.8017 | 0.8059 | 0.8100 | 0.8132 | 0.8152 |
| New Zealand    | 0.7113 | 0.7177 | 0.7306 | 0.7438 | 0.7558 | 0.7651 | 0.7709 | 0.7766 | 0.7802 | 0.7826 | 0.7864 | 0.7904 | 0.7943 | 0.7967 | 0.7989 | 0.8004 | 0.8004 | 0.7998 | 0.7999 | 0.8004 |
| Western Europe | 0.6881 | 0.6956 | 0.7042 | 0.7124 | 0.7202 | 0.7268 | 0.7326 | 0.7381 | 0.7434 | 0.7483 | 0.7537 | 0.7593 | 0.7651 | 0.7706 | 0.7751 | 0.7794 | 0.7837 | 0.7876 | 0.7919 | 0.7965 |
| Andorra        | 0.8213 | 0.8238 | 0.8263 | 0.8288 | 0.8313 | 0.8337 | 0.8360 | 0.8384 | 0.8408 | 0.8431 | 0.8455 | 0.8478 | 0.8502 | 0.8525 | 0.8548 | 0.8571 | 0.8595 | 0.8617 | 0.8640 | 0.8660 |
| Austria        | 0.7504 | 0.7579 | 0.7664 | 0.7732 | 0.7787 | 0.7856 | 0.7922 | 0.7968 | 0.7994 | 0.8007 | 0.8012 | 0.8029 | 0.8072 | 0.8121 | 0.8157 | 0.8176 | 0.8197 | 0.8218 | 0.8242 | 0.8268 |
| Belgium        | 0.7474 | 0.7553 | 0.7655 | 0.7760 | 0.7852 | 0.7914 | 0.7964 | 0.8009 | 0.8051 | 0.8088 | 0.8130 | 0.8178 | 0.8230 | 0.8274 | 0.8311 | 0.8333 | 0.8352 | 0.8373 | 0.8395 | 0.8415 |
| Cyprus         | 0.6340 | 0.6472 | 0.6592 | 0.6702 | 0.6784 | 0.6773 | 0.6759 | 0.6797 | 0.6824 | 0.6852 | 0.6916 | 0.6961 | 0.6988 | 0.7044 | 0.7123 | 0.7195 | 0.7257 | 0.7302 | 0.7338 | 0.7391 |
| Denmark        | 0.8163 | 0.8187 | 0.8247 | 0.8307 | 0.8338 | 0.8394 | 0.8473 | 0.8519 | 0.8555 | 0.8605 | 0.8658 | 0.8673 | 0.8690 | 0.8709 | 0.8731 | 0.8756 | 0.8785 | 0.8798 | 0.8793 | 0.8790 |

**Appendix Table 5A. SDI Values by location, 1970-1989**

| Location                  | 1970   | 1971   | 1972   | 1973   | 1974   | 1975   | 1976   | 1977   | 1978   | 1979   | 1980   | 1981   | 1982   | 1983   | 1984   | 1985   | 1986   | 1987   | 1988   | 1989   |
|---------------------------|--------|--------|--------|--------|--------|--------|--------|--------|--------|--------|--------|--------|--------|--------|--------|--------|--------|--------|--------|--------|
| Finland                   | 0.7694 | 0.7790 | 0.7875 | 0.7921 | 0.7937 | 0.7958 | 0.7995 | 0.8040 | 0.8081 | 0.8120 | 0.8151 | 0.8164 | 0.8175 | 0.8209 | 0.8261 | 0.8316 | 0.8357 | 0.8370 | 0.8379 | 0.8396 |
| France                    | 0.6644 | 0.6711 | 0.6807 | 0.6932 | 0.7070 | 0.7180 | 0.7251 | 0.7309 | 0.7364 | 0.7397 | 0.7431 | 0.7490 | 0.7575 | 0.7647 | 0.7688 | 0.7726 | 0.7774 | 0.7825 | 0.7877 | 0.7931 |
| Germany                   | 0.7482 | 0.7583 | 0.7686 | 0.7769 | 0.7823 | 0.7856 | 0.7888 | 0.7919 | 0.7949 | 0.7976 | 0.8006 | 0.8042 | 0.8070 | 0.8094 | 0.8118 | 0.8142 | 0.8169 | 0.8196 | 0.8225 | 0.8256 |
| Greece                    | 0.6361 | 0.6440 | 0.6525 | 0.6579 | 0.6616 | 0.6670 | 0.6734 | 0.6796 | 0.6845 | 0.6905 | 0.6991 | 0.7075 | 0.7143 | 0.7219 | 0.7309 | 0.7387 | 0.7454 | 0.7510 | 0.7563 | 0.7607 |
| Iceland                   | 0.7482 | 0.7436 | 0.7457 | 0.7619 | 0.7733 | 0.7793 | 0.7914 | 0.8003 | 0.7996 | 0.7997 | 0.8081 | 0.8175 | 0.8230 | 0.8301 | 0.8411 | 0.8479 | 0.8475 | 0.8425 | 0.8422 | 0.8441 |
| Ireland                   | 0.6064 | 0.6095 | 0.6200 | 0.6305 | 0.6430 | 0.6544 | 0.6608 | 0.6664 | 0.6718 | 0.6759 | 0.6838 | 0.6942 | 0.7051 | 0.7173 | 0.7267 | 0.7328 | 0.7401 | 0.7500 | 0.7589 | 0.7638 |
| Israel                    | 0.6418 | 0.6484 | 0.6569 | 0.6658 | 0.6739 | 0.6797 | 0.6822 | 0.6813 | 0.6807 | 0.6842 | 0.6911 | 0.6982 | 0.7005 | 0.6998 | 0.7017 | 0.7078 | 0.7162 | 0.7229 | 0.7268 | 0.7306 |
| Italy                     | 0.6665 | 0.6725 | 0.6785 | 0.6845 | 0.6929 | 0.7021 | 0.7116 | 0.7213 | 0.7306 | 0.7398 | 0.7484 | 0.7554 | 0.7612 | 0.7674 | 0.7723 | 0.7764 | 0.7806 | 0.7849 | 0.7894 | 0.7939 |
| Luxembourg                | 0.7975 | 0.8063 | 0.8182 | 0.8265 | 0.8306 | 0.8338 | 0.8385 | 0.8411 | 0.8438 | 0.8464 | 0.8480 | 0.8506 | 0.8534 | 0.8555 | 0.8579 | 0.8606 | 0.8642 | 0.8678 | 0.8709 | 0.8730 |
| Malta                     | 0.6349 | 0.6410 | 0.6512 | 0.6585 | 0.6610 | 0.6674 | 0.6782 | 0.6897 | 0.6993 | 0.7071 | 0.7166 | 0.7229 | 0.7277 | 0.7334 | 0.7378 | 0.7413 | 0.7434 | 0.7431 | 0.7433 | 0.7471 |
| Netherlands               | 0.7497 | 0.7635 | 0.7779 | 0.7902 | 0.7993 | 0.8058 | 0.8111 | 0.8155 | 0.8191 | 0.8216 | 0.8246 | 0.8296 | 0.8331 | 0.8353 | 0.8376 | 0.8386 | 0.8402 | 0.8430 | 0.8461 | 0.8477 |
| Norway                    | 0.7511 | 0.7573 | 0.7670 | 0.7767 | 0.7859 | 0.7957 | 0.8047 | 0.8105 | 0.8142 | 0.8191 | 0.8243 | 0.8283 | 0.8326 | 0.8371 | 0.8403 | 0.8429 | 0.8449 | 0.8452 | 0.8447 | 0.8453 |
| Portugal                  | 0.5236 | 0.5328 | 0.5439 | 0.5536 | 0.5602 | 0.5643 | 0.5706 | 0.5814 | 0.5930 | 0.6022 | 0.6105 | 0.6185 | 0.6264 | 0.6343 | 0.6428 | 0.6513 | 0.6584 | 0.6651 | 0.6722 | 0.6796 |
| Spain                     | 0.5813 | 0.5869 | 0.5942 | 0.5998 | 0.6078 | 0.6160 | 0.6237 | 0.6344 | 0.6457 | 0.6577 | 0.6696 | 0.6797 | 0.6889 | 0.6978 | 0.7051 | 0.7131 | 0.7209 | 0.7273 | 0.7332 | 0.7395 |
| Sweden                    | 0.7557 | 0.7597 | 0.7654 | 0.7697 | 0.7753 | 0.7830 | 0.7891 | 0.7935 | 0.7957 | 0.7964 | 0.7993 | 0.8032 | 0.8063 | 0.8081 | 0.8081 | 0.8078 | 0.8085 | 0.8080 | 0.8070 | 0.8060 |
| Switzerland               | 0.8365 | 0.8425 | 0.8492 | 0.8551 | 0.8608 | 0.8650 | 0.8671 | 0.8680 | 0.8681 | 0.8673 | 0.8669 | 0.8671 | 0.8677 | 0.8683 | 0.8686 | 0.8690 | 0.8694 | 0.8691 | 0.8686 | 0.8686 |
| United Kingdom            | 0.6490 | 0.6568 | 0.6660 | 0.6754 | 0.6832 | 0.6898 | 0.6953 | 0.6992 | 0.7022 | 0.7058 | 0.7109 | 0.7167 | 0.7223 | 0.7274 | 0.7320 | 0.7370 | 0.7418 | 0.7464 | 0.7525 | 0.7583 |
| Sweden except Stockholm   | 0.7254 | 0.7298 | 0.7362 | 0.7410 | 0.7472 | 0.7557 | 0.7623 | 0.7671 | 0.7697 | 0.7708 | 0.7741 | 0.7784 | 0.7819 | 0.7840 | 0.7843 | 0.7840 | 0.7850 | 0.7846 | 0.7839 | 0.7831 |
| Stockholm                 | 0.8430 | 0.8463 | 0.8494 | 0.8524 | 0.8551 | 0.8577 | 0.8600 | 0.8617 | 0.8633 | 0.8649 | 0.8664 | 0.8680 | 0.8696 | 0.8712 | 0.8731 | 0.8749 | 0.8769 | 0.8791 | 0.8805 | 0.8793 |
| Northern Ireland          | 0.6732 | 0.6784 | 0.6845 | 0.6914 | 0.6976 | 0.7029 | 0.7076 | 0.7102 | 0.7100 | 0.7116 | 0.7182 | 0.7263 | 0.7324 | 0.7372 | 0.7418 | 0.7468 | 0.7523 | 0.7593 | 0.7678 | 0.7755 |
| Scotland                  | 0.6416 | 0.6507 | 0.6620 | 0.6715 | 0.6789 | 0.6853 | 0.6926 | 0.6974 | 0.6988 | 0.7011 | 0.7057 | 0.7117 | 0.7184 | 0.7238 | 0.7278 | 0.7322 | 0.7369 | 0.7415 | 0.7475 | 0.7525 |
| Wales                     | 0.6153 | 0.6231 | 0.6324 | 0.6421 | 0.6502 | 0.6570 | 0.6627 | 0.6671 | 0.6708 | 0.6751 | 0.6806 | 0.6865 | 0.6921 | 0.6974 | 0.7022 | 0.7076 | 0.7132 | 0.7185 | 0.7257 | 0.7325 |
| England                   | 0.6501 | 0.6579 | 0.6669 | 0.6763 | 0.6843 | 0.6909 | 0.6962 | 0.7000 | 0.7032 | 0.7071 | 0.7121 | 0.7179 | 0.7234 | 0.7285 | 0.7331 | 0.7381 | 0.7429 | 0.7475 | 0.7535 | 0.7592 |
| Darlington                | 0.6292 | 0.6374 | 0.6471 | 0.6572 | 0.6656 | 0.6723 | 0.6778 | 0.6818 | 0.6853 | 0.6896 | 0.6952 | 0.7015 | 0.7077 | 0.7139 | 0.7194 | 0.7251 | 0.7305 | 0.7354 | 0.7409 | 0.7444 |
| Northumberland            | 0.6175 | 0.6257 | 0.6354 | 0.6455 | 0.6539 | 0.6606 | 0.6661 | 0.6701 | 0.6737 | 0.6780 | 0.6834 | 0.6893 | 0.6951 | 0.7009 | 0.7066 | 0.7130 | 0.7196 | 0.7259 | 0.7328 | 0.7383 |
| Stockton-on-Tees          | 0.6219 | 0.6309 | 0.6414 | 0.6524 | 0.6614 | 0.6688 | 0.6746 | 0.6787 | 0.6822 | 0.6864 | 0.6917 | 0.6976 | 0.7030 | 0.7084 | 0.7139 | 0.7206 | 0.7270 | 0.7331 | 0.7397 | 0.7446 |
| Newcastle upon Tyne       | 0.6361 | 0.6446 | 0.6544 | 0.6646 | 0.6732 | 0.6803 | 0.6862 | 0.6908 | 0.6949 | 0.6998 | 0.7054 | 0.7114 | 0.7168 | 0.7218 | 0.7261 | 0.7312 | 0.7365 | 0.7427 | 0.7499 | 0.7563 |
| North Tyneside            | 0.6146 | 0.6231 | 0.6329 | 0.6432 | 0.6517 | 0.6586 | 0.6643 | 0.6686 | 0.6724 | 0.6768 | 0.6820 | 0.6874 | 0.6923 | 0.6965 | 0.7006 | 0.7056 | 0.7114 | 0.7177 | 0.7252 | 0.7315 |
| Redcar and Cleveland      | 0.5907 | 0.5994 | 0.6096 | 0.6203 | 0.6290 | 0.6361 | 0.6418 | 0.6458 | 0.6494 | 0.6536 | 0.6590 | 0.6649 | 0.6704 | 0.6756 | 0.6803 | 0.6855 | 0.6912 | 0.6972 | 0.7044 | 0.7103 |
| County Durham             | 0.6062 | 0.6145 | 0.6243 | 0.6345 | 0.6429 | 0.6498 | 0.6554 | 0.6596 | 0.6633 | 0.6678 | 0.6733 | 0.6793 | 0.6850 | 0.6905 | 0.6957 | 0.7016 | 0.7075 | 0.7131 | 0.7192 | 0.7242 |
| Gateshead                 | 0.6211 | 0.6293 | 0.6389 | 0.6489 | 0.6572 | 0.6640 | 0.6695 | 0.6736 | 0.6772 | 0.6815 | 0.6867 | 0.6924 | 0.6977 | 0.7029 | 0.7078 | 0.7134 | 0.7191 | 0.7251 | 0.7322 | 0.7385 |
| Middlesbrough             | 0.5937 | 0.6034 | 0.6147 | 0.6265 | 0.6362 | 0.6440 | 0.6502 | 0.6544 | 0.6579 | 0.6622 | 0.6679 | 0.6742 | 0.6802 | 0.6856 | 0.6900 | 0.6946 | 0.6994 | 0.7046 | 0.7125 | 0.7202 |
| South Tyneside            | 0.5866 | 0.5954 | 0.6056 | 0.6162 | 0.6249 | 0.6321 | 0.6381 | 0.6427 | 0.6469 | 0.6515 | 0.6567 | 0.6618 | 0.6660 | 0.6692 | 0.6716 | 0.6751 | 0.6799 | 0.6859 | 0.6937 | 0.7008 |
| Sunderland                | 0.6076 | 0.6163 | 0.6265 | 0.6371 | 0.6459 | 0.6530 | 0.6588 | 0.6629 | 0.6666 | 0.6709 | 0.6764 | 0.6825 | 0.6886 | 0.6944 | 0.6998 | 0.7059 | 0.7119 | 0.7178 | 0.7247 | 0.7308 |
| Hartlepool                | 0.6017 | 0.6106 | 0.6210 | 0.6318 | 0.6408 | 0.6481 | 0.6540 | 0.6584 | 0.6622 | 0.6667 | 0.6720 | 0.6776 | 0.6827 | 0.6872 | 0.6910 | 0.6953 | 0.6995 | 0.7043 | 0.7110 | 0.7178 |
| Cheshire East             | 0.6639 | 0.6718 | 0.6811 | 0.6908 | 0.6989 | 0.7055 | 0.7108 | 0.7147 | 0.7178 | 0.7215 | 0.7262 | 0.7316 | 0.7367 | 0.7419 | 0.7469 | 0.7528 | 0.7584 | 0.7636 | 0.7695 | 0.7743 |
| Stockport                 | 0.6388 | 0.6469 | 0.6564 | 0.6663 | 0.6746 | 0.6813 | 0.6866 | 0.6904 | 0.6934 | 0.6971 | 0.7021 | 0.7078 | 0.7136 | 0.7193 | 0.7244 | 0.7296 | 0.7343 | 0.7397 | 0.7469 | 0.7527 |
| Trafford                  | 0.6618 | 0.6701 | 0.6799 | 0.6899 | 0.6984 | 0.7054 | 0.7109 | 0.7149 | 0.7181 | 0.7218 | 0.7265 | 0.7317 | 0.7366 | 0.7411 | 0.7454 | 0.7504 | 0.7553 | 0.7604 | 0.7668 | 0.7724 |
| Cheshire West and Chester | 0.6509 | 0.6592 | 0.6688 | 0.6789 | 0.6873 | 0.6941 | 0.6995 | 0.7032 | 0.7062 | 0.7097 | 0.7145 | 0.7201 | 0.7256 | 0.7309 | 0.7360 | 0.7415 | 0.7466 | 0.7508 | 0.7560 | 0.7609 |
| Sefton                    | 0.6190 | 0.6270 | 0.6363 | 0.6460 | 0.6541 | 0.6608 | 0.6662 | 0.6701 | 0.6734 | 0.6772 | 0.6821 | 0.6876 | 0.6931 | 0.6985 | 0.7035 | 0.7092 | 0.7146 | 0.7195 | 0.7251 | 0.7299 |
| Lancashire                | 0.6275 | 0.6362 | 0.6464 | 0.6570 | 0.6659 | 0.6731 | 0.6788 | 0.6828 | 0.6859 | 0.6896 | 0.6945 | 0.7000 | 0.7054 | 0.7106 | 0.7156 | 0.7212 | 0.7266 | 0.7317 | 0.7379 | 0.7436 |
| Cumbria                   | 0.6398 | 0.6477 | 0.6569 | 0.6665 | 0.6745 | 0.6811 | 0.6864 | 0.6903 | 0.6935 | 0.6973 | 0.7020 | 0.7074 | 0.7127 | 0.7180 | 0.7233 | 0.7295 | 0.7357 | 0.7413 | 0.7472 | 0.7514 |
| Bolton                    | 0.6132 | 0.6218 | 0.6318 | 0.6422 | 0.6510 | 0.6581 | 0.6636 | 0.6674 | 0.6703 | 0.6738 | 0.6785 | 0.6841 | 0.6897 | 0.6952 | 0.7006 | 0.7069 | 0.7131 | 0.7187 | 0.7251 | 0.7305 |
| Wirral                    | 0.6105 | 0.6190 | 0.6290 | 0.6393 | 0.6479 | 0.6549 | 0.6606 | 0.6647 | 0.6681 | 0.6720 | 0.6768 | 0.6822 | 0.6873 | 0.6919 | 0.6958 | 0.7003 | 0.7047 | 0.7095 | 0.7161 | 0.7221 |
| Bury                      | 0.6156 | 0.6244 | 0.6346 | 0.6451 | 0.6539 | 0.6611 | 0.6669 | 0.6711 | 0.6745 | 0.6783 | 0.6830 | 0.6880 | 0.6926 | 0.6965 | 0.6997 | 0.7040 | 0.7089 | 0.7140 | 0.7204 | 0.7266 |
| St Helens                 | 0.6091 | 0.6166 | 0.6255 | 0.6348 | 0.6425 | 0.6488 | 0.6540 | 0.6578 | 0.6611 | 0.6650 | 0.6698 | 0.6752 | 0.6806 | 0.6861 | 0.6911 | 0.6969 | 0.7029 | 0.7088 | 0.7151 | 0.7196 |
| Warrington                | 0.6569 | 0.6649 | 0.6743 | 0.6841 | 0.6923 | 0.6990 | 0.7043 | 0.7080 | 0.7109 | 0.7143 | 0.7189 | 0.7242 | 0.7297 | 0.7351 | 0.7405 | 0.7468 | 0.7531 | 0.7593 | 0.7660 | 0.7708 |
| Oldham                    | 0.6029 | 0.6115 | 0.6216 | 0.6321 | 0.6409 | 0.6480 | 0.6536 | 0.6575 | 0.6605 | 0.6640 | 0.6686 | 0.6740 | 0.6791 | 0.6840 | 0.6885 | 0.6937 | 0.6990 | 0.7040 | 0.7101 | 0.7155 |
| Rochdale                  | 0.6005 | 0.6093 | 0.6197 | 0.6304 | 0.6394 | 0.6468 | 0.6525 | 0.6564 | 0.6594 | 0.6630 | 0.6677 | 0.6733 | 0.6785 | 0.6835 | 0.6885 | 0.6943 | 0.7001 | 0.7053 | 0.7115 | 0.7164 |

**Appendix Table 5A. SDI Values by location, 1970-1989**

| Location                    | 1970   | 1971   | 1972   | 1973   | 1974   | 1975   | 1976   | 1977   | 1978   | 1979   | 1980   | 1981   | 1982   | 1983   | 1984   | 1985   | 1986   | 1987   | 1988   | 1989   |
|-----------------------------|--------|--------|--------|--------|--------|--------|--------|--------|--------|--------|--------|--------|--------|--------|--------|--------|--------|--------|--------|--------|
| Wigan                       | 0.6068 | 0.6150 | 0.6247 | 0.6347 | 0.6431 | 0.6499 | 0.6554 | 0.6593 | 0.6624 | 0.6661 | 0.6709 | 0.6763 | 0.6817 | 0.6871 | 0.6923 | 0.6982 | 0.7040 | 0.7096 | 0.7163 | 0.7223 |
| Halton                      | 0.6198 | 0.6288 | 0.6394 | 0.6503 | 0.6595 | 0.6671 | 0.6732 | 0.6775 | 0.6809 | 0.6848 | 0.6898 | 0.6953 | 0.7000 | 0.7040 | 0.7074 | 0.7110 | 0.7149 | 0.7199 | 0.7274 | 0.7343 |
| Liverpool                   | 0.6166 | 0.6257 | 0.6362 | 0.6471 | 0.6562 | 0.6638 | 0.6700 | 0.6745 | 0.6783 | 0.6825 | 0.6876 | 0.6930 | 0.6979 | 0.7020 | 0.7052 | 0.7089 | 0.7124 | 0.7160 | 0.7216 | 0.7286 |
| Tameside                    | 0.6061 | 0.6147 | 0.6246 | 0.6349 | 0.6436 | 0.6508 | 0.6565 | 0.6605 | 0.6638 | 0.6676 | 0.6725 | 0.6779 | 0.6830 | 0.6878 | 0.6922 | 0.6973 | 0.7023 | 0.7071 | 0.7131 | 0.7187 |
| Salford                     | 0.6237 | 0.6323 | 0.6423 | 0.6526 | 0.6613 | 0.6684 | 0.6742 | 0.6784 | 0.6818 | 0.6857 | 0.6906 | 0.6960 | 0.7013 | 0.7060 | 0.7095 | 0.7139 | 0.7186 | 0.7225 | 0.7275 | 0.7324 |
| Blackburn with Darwen       | 0.5974 | 0.6071 | 0.6184 | 0.6300 | 0.6398 | 0.6478 | 0.6540 | 0.6580 | 0.6610 | 0.6646 | 0.6694 | 0.6750 | 0.6804 | 0.6852 | 0.6893 | 0.6938 | 0.6980 | 0.7022 | 0.7086 | 0.7149 |
| Knowsley                    | 0.5989 | 0.6077 | 0.6179 | 0.6286 | 0.6376 | 0.6448 | 0.6504 | 0.6541 | 0.6569 | 0.6604 | 0.6655 | 0.6717 | 0.6775 | 0.6834 | 0.6889 | 0.6945 | 0.6996 | 0.7042 | 0.7096 | 0.7149 |
| Blackpool                   | 0.5995 | 0.6077 | 0.6171 | 0.6270 | 0.6353 | 0.6423 | 0.6482 | 0.6527 | 0.6568 | 0.6615 | 0.6672 | 0.6735 | 0.6794 | 0.6849 | 0.6885 | 0.6903 | 0.6912 | 0.6935 | 0.6989 | 0.7041 |
| Manchester                  | 0.6451 | 0.6540 | 0.6641 | 0.6747 | 0.6837 | 0.6912 | 0.6974 | 0.7020 | 0.7058 | 0.7101 | 0.7154 | 0.7211 | 0.7261 | 0.7306 | 0.7344 | 0.7390 | 0.7441 | 0.7491 | 0.7555 | 0.7615 |
| North Yorkshire             | 0.6461 | 0.6535 | 0.6622 | 0.6713 | 0.6789 | 0.6852 | 0.6903 | 0.6941 | 0.6974 | 0.7014 | 0.7066 | 0.7125 | 0.7183 | 0.7242 | 0.7301 | 0.7362 | 0.7419 | 0.7474 | 0.7539 | 0.7589 |
| East Riding of Yorkshire    | 0.6324 | 0.6401 | 0.6490 | 0.6584 | 0.6663 | 0.6728 | 0.6781 | 0.6822 | 0.6858 | 0.6902 | 0.6956 | 0.7020 | 0.7082 | 0.7140 | 0.7195 | 0.7244 | 0.7267 | 0.7264 | 0.7299 | 0.7381 |
| York                        | 0.6613 | 0.6696 | 0.6791 | 0.6890 | 0.6974 | 0.7044 | 0.7103 | 0.7148 | 0.7189 | 0.7235 | 0.7289 | 0.7346 | 0.7400 | 0.7449 | 0.7487 | 0.7526 | 0.7560 | 0.7598 | 0.7658 | 0.7729 |
| North East Lincolnshire     | 0.6249 | 0.6337 | 0.6440 | 0.6545 | 0.6635 | 0.6708 | 0.6768 | 0.6810 | 0.6845 | 0.6884 | 0.6932 | 0.6982 | 0.7025 | 0.7062 | 0.7093 | 0.7141 | 0.7207 | 0.7285 | 0.7360 | 0.7403 |
| Calderdale                  | 0.6223 | 0.6307 | 0.6405 | 0.6508 | 0.6594 | 0.6664 | 0.6720 | 0.6759 | 0.6792 | 0.6830 | 0.6879 | 0.6936 | 0.6990 | 0.7041 | 0.7094 | 0.7158 | 0.7224 | 0.7286 | 0.7356 | 0.7414 |
| North Lincolnshire          | 0.6253 | 0.6337 | 0.6434 | 0.6535 | 0.6620 | 0.6690 | 0.6746 | 0.6785 | 0.6818 | 0.6857 | 0.6906 | 0.6961 | 0.7013 | 0.7060 | 0.7101 | 0.7149 | 0.7196 | 0.7241 | 0.7306 | 0.7363 |
| Bradford                    | 0.6000 | 0.6092 | 0.6199 | 0.6311 | 0.6404 | 0.6480 | 0.6539 | 0.6579 | 0.6609 | 0.6645 | 0.6694 | 0.6751 | 0.6806 | 0.6856 | 0.6902 | 0.6959 | 0.7017 | 0.7072 | 0.7142 | 0.7203 |
| Kirklees                    | 0.6105 | 0.6189 | 0.6288 | 0.6391 | 0.6477 | 0.6547 | 0.6603 | 0.6642 | 0.6673 | 0.6712 | 0.6763 | 0.6823 | 0.6882 | 0.6940 | 0.6994 | 0.7053 | 0.7109 | 0.7163 | 0.7229 | 0.7289 |
| Leeds                       | 0.6416 | 0.6497 | 0.6592 | 0.6690 | 0.6773 | 0.6842 | 0.6899 | 0.6941 | 0.6978 | 0.7020 | 0.7074 | 0.7133 | 0.7190 | 0.7243 | 0.7291 | 0.7340 | 0.7387 | 0.7433 | 0.7498 | 0.7565 |
| Sheffield                   | 0.6396 | 0.6470 | 0.6556 | 0.6646 | 0.6722 | 0.6786 | 0.6841 | 0.6883 | 0.6921 | 0.6966 | 0.7018 | 0.7074 | 0.7130 | 0.7182 | 0.7226 | 0.7274 | 0.7319 | 0.7366 | 0.7425 | 0.7481 |
| Wakefield                   | 0.6149 | 0.6229 | 0.6323 | 0.6421 | 0.6504 | 0.6572 | 0.6628 | 0.6669 | 0.6703 | 0.6744 | 0.6796 | 0.6853 | 0.6908 | 0.6958 | 0.7006 | 0.7058 | 0.7110 | 0.7163 | 0.7227 | 0.7284 |
| Rotherham                   | 0.6032 | 0.6113 | 0.6207 | 0.6306 | 0.6388 | 0.6456 | 0.6510 | 0.6549 | 0.6582 | 0.6621 | 0.6672 | 0.6729 | 0.6785 | 0.6838 | 0.6886 | 0.6941 | 0.6993 | 0.7042 | 0.7102 | 0.7155 |
| Doncaster                   | 0.5989 | 0.6070 | 0.6164 | 0.6263 | 0.6345 | 0.6413 | 0.6468 | 0.6507 | 0.6540 | 0.6578 | 0.6628 | 0.6684 | 0.6736 | 0.6788 | 0.6833 | 0.6887 | 0.6943 | 0.6999 | 0.7066 | 0.7121 |
| Kingston upon Hull, City of | 0.6056 | 0.6144 | 0.6246 | 0.6350 | 0.6439 | 0.6513 | 0.6574 | 0.6620 | 0.6659 | 0.6702 | 0.6752 | 0.6803 | 0.6846 | 0.6880 | 0.6902 | 0.6937 | 0.6998 | 0.7088 | 0.7176 | 0.7215 |
| Barnsley                    | 0.5964 | 0.6043 | 0.6136 | 0.6232 | 0.6313 | 0.6379 | 0.6433 | 0.6472 | 0.6506 | 0.6546 | 0.6597 | 0.6654 | 0.6708 | 0.6760 | 0.6812 | 0.6868 | 0.6920 | 0.6969 | 0.7027 | 0.7078 |
| Northamptonshire            | 0.6333 | 0.6414 | 0.6506 | 0.6601 | 0.6681 | 0.6748 | 0.6804 | 0.6846 | 0.6883 | 0.6927 | 0.6983 | 0.7045 | 0.7105 | 0.7157 | 0.7200 | 0.7250 | 0.7298 | 0.7343 | 0.7404 | 0.7460 |
| Leicestershire              | 0.6439 | 0.6514 | 0.6600 | 0.6690 | 0.6764 | 0.6827 | 0.6879 | 0.6919 | 0.6954 | 0.6997 | 0.7052 | 0.7113 | 0.7172 | 0.7227 | 0.7278 | 0.7335 | 0.7388 | 0.7441 | 0.7504 | 0.7557 |
| Lincolnshire                | 0.6270 | 0.6343 | 0.6427 | 0.6514 | 0.6586 | 0.6647 | 0.6698 | 0.6736 | 0.6771 | 0.6814 | 0.6869 | 0.6931 | 0.6990 | 0.7049 | 0.7103 | 0.7162 | 0.7217 | 0.7269 | 0.7330 | 0.7379 |
| Rutland                     | 0.6444 | 0.6521 | 0.6609 | 0.6699 | 0.6774 | 0.6835 | 0.6884 | 0.6918 | 0.6946 | 0.6982 | 0.7032 | 0.7092 | 0.7154 | 0.7215 | 0.7283 | 0.7362 | 0.7436 | 0.7509 | 0.7596 | 0.7654 |
| Derby                       | 0.6260 | 0.6342 | 0.6436 | 0.6532 | 0.6613 | 0.6679 | 0.6730 | 0.6766 | 0.6795 | 0.6834 | 0.6891 | 0.6961 | 0.7032 | 0.7101 | 0.7163 | 0.7227 | 0.7284 | 0.7329 | 0.7382 | 0.7429 |
| Derbyshire                  | 0.6209 | 0.6286 | 0.6373 | 0.6463 | 0.6538 | 0.6600 | 0.6653 | 0.6692 | 0.6727 | 0.6770 | 0.6825 | 0.6886 | 0.6945 | 0.7000 | 0.7052 | 0.7108 | 0.7164 | 0.7216 | 0.7278 | 0.7329 |
| Nottinghamshire             | 0.6194 | 0.6268 | 0.6353 | 0.6441 | 0.6514 | 0.6576 | 0.6627 | 0.6665 | 0.6701 | 0.6744 | 0.6799 | 0.6860 | 0.6919 | 0.6977 | 0.7031 | 0.7088 | 0.7141 | 0.7192 | 0.7254 | 0.7309 |
| Nottingham                  | 0.6365 | 0.6449 | 0.6543 | 0.6640 | 0.6723 | 0.6794 | 0.6852 | 0.6897 | 0.6937 | 0.6985 | 0.7045 | 0.7112 | 0.7178 | 0.7236 | 0.7291 | 0.7335 | 0.7371 | 0.7406 | 0.7460 | 0.7526 |
| Leicester                   | 0.6048 | 0.6137 | 0.6238 | 0.6341 | 0.6428 | 0.6501 | 0.6561 | 0.6603 | 0.6639 | 0.6682 | 0.6739 | 0.6805 | 0.6864 | 0.6917 | 0.6964 | 0.7019 | 0.7066 | 0.7109 | 0.7172 | 0.7243 |
| Warwickshire                | 0.6513 | 0.6591 | 0.6681 | 0.6775 | 0.6855 | 0.6921 | 0.6975 | 0.7014 | 0.7048 | 0.7088 | 0.7139 | 0.7195 | 0.7251 | 0.7306 | 0.7355 | 0.7407 | 0.7457 | 0.7504 | 0.7562 | 0.7612 |
| Herefordshire, County of    | 0.6286 | 0.6363 | 0.6454 | 0.6550 | 0.6631 | 0.6697 | 0.6751 | 0.6789 | 0.6822 | 0.6863 | 0.6915 | 0.6976 | 0.7036 | 0.7094 | 0.7149 | 0.7203 | 0.7246 | 0.7285 | 0.7335 | 0.7375 |
| Solihull                    | 0.6608 | 0.6686 | 0.6777 | 0.6871 | 0.6951 | 0.7017 | 0.7070 | 0.7110 | 0.7144 | 0.7184 | 0.7232 | 0.7284 | 0.7334 | 0.7379 | 0.7418 | 0.7463 | 0.7508 | 0.7554 | 0.7610 | 0.7651 |
| Shropshire                  | 0.6327 | 0.6403 | 0.6491 | 0.6584 | 0.6663 | 0.6727 | 0.6780 | 0.6819 | 0.6853 | 0.6892 | 0.6942 | 0.6997 | 0.7051 | 0.7103 | 0.7157 | 0.7216 | 0.7275 | 0.7327 | 0.7385 | 0.7429 |
| Worcestershire              | 0.6253 | 0.6330 | 0.6421 | 0.6517 | 0.6597 | 0.6663 | 0.6717 | 0.6756 | 0.6789 | 0.6828 | 0.6879 | 0.6936 | 0.6992 | 0.7048 | 0.7101 | 0.7159 | 0.7214 | 0.7267 | 0.7327 | 0.7377 |
| Staffordshire               | 0.6259 | 0.6338 | 0.6431 | 0.6528 | 0.6610 | 0.6677 | 0.6732 | 0.6772 | 0.6806 | 0.6845 | 0.6896 | 0.6952 | 0.7005 | 0.7057 | 0.7106 | 0.7161 | 0.7214 | 0.7267 | 0.7331 | 0.7389 |
| Dudley                      | 0.6150 | 0.6228 | 0.6318 | 0.6413 | 0.6492 | 0.6558 | 0.6611 | 0.6650 | 0.6683 | 0.6721 | 0.6770 | 0.6823 | 0.6877 | 0.6928 | 0.6975 | 0.7029 | 0.7084 | 0.7140 | 0.7207 | 0.7263 |
| Coventry                    | 0.6286 | 0.6374 | 0.6475 | 0.6580 | 0.6669 | 0.6743 | 0.6802 | 0.6844 | 0.6877 | 0.6916 | 0.6966 | 0.7020 | 0.7069 | 0.7113 | 0.7150 | 0.7193 | 0.7238 | 0.7286 | 0.7354 | 0.7424 |
| Telford and Wrekin          | 0.6306 | 0.6392 | 0.6493 | 0.6598 | 0.6686 | 0.6759 | 0.6817 | 0.6857 | 0.6889 | 0.6928 | 0.6979 | 0.7039 | 0.7098 | 0.7155 | 0.7207 | 0.7262 | 0.7311 | 0.7359 | 0.7418 | 0.7473 |
| Stoke-on-Trent              | 0.6049 | 0.6132 | 0.6227 | 0.6326 | 0.6411 | 0.6481 | 0.6537 | 0.6578 | 0.6612 | 0.6652 | 0.6702 | 0.6757 | 0.6809 | 0.6859 | 0.6912 | 0.6969 | 0.7013 | 0.7047 | 0.7098 | 0.7160 |
| Walsall                     | 0.6043 | 0.6123 | 0.6215 | 0.6312 | 0.6394 | 0.6461 | 0.6514 | 0.6552 | 0.6583 | 0.6619 | 0.6666 | 0.6718 | 0.6769 | 0.6816 | 0.6859 | 0.6911 | 0.6968 | 0.7024 | 0.7089 | 0.7140 |
| Wolverhampton               | 0.6140 | 0.6220 | 0.6314 | 0.6411 | 0.6495 | 0.6563 | 0.6619 | 0.6660 | 0.6694 | 0.6733 | 0.6783 | 0.6837 | 0.6888 | 0.6935 | 0.6978 | 0.7028 | 0.7074 | 0.7117 | 0.7174 | 0.7229 |
| Birmingham                  | 0.6113 | 0.6202 | 0.6307 | 0.6415 | 0.6507 | 0.6582 | 0.6641 | 0.6682 | 0.6715 | 0.6753 | 0.6803 | 0.6858 | 0.6912 | 0.6959 | 0.7001 | 0.7049 | 0.7097 | 0.7141 | 0.7204 | 0.7266 |
| Sandwell                    | 0.6022 | 0.6103 | 0.6198 | 0.6297 | 0.6381 | 0.6450 | 0.6505 | 0.6544 | 0.6575 | 0.6611 | 0.6660 | 0.6714 | 0.6768 | 0.6817 | 0.6863 | 0.6914 | 0.6964 | 0.7015 | 0.7081 | 0.7141 |
| Bedford                     | 0.6509 | 0.6589 | 0.6680 | 0.6774 | 0.6852 | 0.6916 | 0.6966 | 0.7000 | 0.7028 | 0.7063 | 0.7113 | 0.7172 | 0.7227 | 0.7280 | 0.7332 | 0.7388 | 0.7446 | 0.7503 | 0.7574 | 0.7644 |
| Central Bedfordshire        | 0.6461 | 0.6544 | 0.6638 | 0.6734 | 0.6815 | 0.6882 | 0.6935 | 0.6972 | 0.7002 | 0.7039 | 0.7089 | 0.7147 | 0.7200 | 0.7251 | 0.7296 | 0.7349 | 0.7407 | 0.7467 | 0.7536 | 0.7593 |

**Appendix Table 5A. SDI Values by location, 1970-1989**

| Location               | 1970   | 1971   | 1972   | 1973   | 1974   | 1975   | 1976   | 1977   | 1978   | 1979   | 1980   | 1981   | 1982   | 1983   | 1984   | 1985   | 1986   | 1987   | 1988   | 1989   |
|------------------------|--------|--------|--------|--------|--------|--------|--------|--------|--------|--------|--------|--------|--------|--------|--------|--------|--------|--------|--------|--------|
| Suffolk                | 0.6425 | 0.6505 | 0.6595 | 0.6688 | 0.6765 | 0.6829 | 0.6880 | 0.6917 | 0.6947 | 0.6984 | 0.7034 | 0.7093 | 0.7150 | 0.7203 | 0.7253 | 0.7309 | 0.7358 | 0.7402 | 0.7459 | 0.7516 |
| Hertfordshire          | 0.6700 | 0.6779 | 0.6868 | 0.6960 | 0.7037 | 0.7100 | 0.7151 | 0.7188 | 0.7219 | 0.7258 | 0.7310 | 0.7370 | 0.7429 | 0.7482 | 0.7527 | 0.7569 | 0.7604 | 0.7638 | 0.7692 | 0.7752 |
| Essex                  | 0.6392 | 0.6471 | 0.6561 | 0.6653 | 0.6730 | 0.6793 | 0.6845 | 0.6882 | 0.6914 | 0.6954 | 0.7006 | 0.7065 | 0.7122 | 0.7174 | 0.7218 | 0.7264 | 0.7303 | 0.7340 | 0.7395 | 0.7450 |
| Cambridgeshire         | 0.6663 | 0.6743 | 0.6834 | 0.6927 | 0.7005 | 0.7070 | 0.7122 | 0.7161 | 0.7193 | 0.7233 | 0.7284 | 0.7341 | 0.7397 | 0.7447 | 0.7494 | 0.7550 | 0.7602 | 0.7647 | 0.7708 | 0.7767 |
| Thurrock               | 0.6372 | 0.6459 | 0.6556 | 0.6654 | 0.6738 | 0.6808 | 0.6864 | 0.6904 | 0.6938 | 0.6976 | 0.7024 | 0.7075 | 0.7115 | 0.7145 | 0.7166 | 0.7195 | 0.7226 | 0.7261 | 0.7329 | 0.7410 |
| Norfolk                | 0.6419 | 0.6496 | 0.6583 | 0.6672 | 0.6747 | 0.6810 | 0.6861 | 0.6899 | 0.6932 | 0.6972 | 0.7024 | 0.7082 | 0.7139 | 0.7190 | 0.7233 | 0.7279 | 0.7325 | 0.7372 | 0.7434 | 0.7492 |
| Southend-on-Sea        | 0.6190 | 0.6272 | 0.6364 | 0.6459 | 0.6539 | 0.6606 | 0.6661 | 0.6704 | 0.6740 | 0.6782 | 0.6832 | 0.6885 | 0.6930 | 0.6965 | 0.6993 | 0.7031 | 0.7087 | 0.7158 | 0.7242 | 0.7306 |
| Peterborough           | 0.6492 | 0.6576 | 0.6671 | 0.6768 | 0.6851 | 0.6919 | 0.6974 | 0.7013 | 0.7045 | 0.7083 | 0.7132 | 0.7187 | 0.7239 | 0.7281 | 0.7319 | 0.7369 | 0.7421 | 0.7471 | 0.7534 | 0.7588 |
| Luton                  | 0.6239 | 0.6332 | 0.6437 | 0.6544 | 0.6634 | 0.6707 | 0.6764 | 0.6802 | 0.6832 | 0.6869 | 0.6919 | 0.6978 | 0.7031 | 0.7073 | 0.7101 | 0.7126 | 0.7147 | 0.7175 | 0.7246 | 0.7332 |
| Richmond upon Thames   | 0.7005 | 0.7073 | 0.7153 | 0.7236 | 0.7308 | 0.7357 | 0.7401 | 0.7447 | 0.7498 | 0.7545 | 0.7598 | 0.7656 | 0.7708 | 0.7752 | 0.7788 | 0.7829 | 0.7869 | 0.7913 | 0.7977 | 0.8054 |
| Kensington and Chelsea | 0.7483 | 0.7550 | 0.7604 | 0.7648 | 0.7690 | 0.7732 | 0.7777 | 0.7824 | 0.7875 | 0.7930 | 0.7984 | 0.8036 | 0.8090 | 0.8146 | 0.8204 | 0.8263 | 0.8320 | 0.8370 | 0.8398 | 0.8482 |
| Barnet                 | 0.6711 | 0.6778 | 0.6856 | 0.6938 | 0.7009 | 0.7069 | 0.7120 | 0.7159 | 0.7193 | 0.7235 | 0.7290 | 0.7355 | 0.7418 | 0.7476 | 0.7532 | 0.7590 | 0.7640 | 0.7689 | 0.7752 | 0.7823 |
| Westminster            | 0.7662 | 0.7724 | 0.7791 | 0.7821 | 0.7852 | 0.7885 | 0.7920 | 0.7957 | 0.7995 | 0.8036 | 0.8079 | 0.8124 | 0.8166 | 0.8210 | 0.8252 | 0.8295 | 0.8307 | 0.8325 | 0.8372 | 0.8443 |
| Bromley                | 0.6707 | 0.6774 | 0.6853 | 0.6935 | 0.7007 | 0.7065 | 0.7109 | 0.7157 | 0.7203 | 0.7246 | 0.7300 | 0.7358 | 0.7411 | 0.7455 | 0.7490 | 0.7527 | 0.7565 | 0.7610 | 0.7675 | 0.7739 |
| Bexley                 | 0.6410 | 0.6480 | 0.6560 | 0.6644 | 0.6717 | 0.6781 | 0.6834 | 0.6876 | 0.6913 | 0.6957 | 0.7011 | 0.7070 | 0.7127 | 0.7175 | 0.7215 | 0.7256 | 0.7296 | 0.7333 | 0.7386 | 0.7438 |
| Redbridge              | 0.6441 | 0.6508 | 0.6585 | 0.6667 | 0.6738 | 0.6799 | 0.6850 | 0.6889 | 0.6923 | 0.6963 | 0.7017 | 0.7078 | 0.7131 | 0.7180 | 0.7229 | 0.7286 | 0.7339 | 0.7396 | 0.7464 | 0.7522 |
| Merton                 | 0.6623 | 0.6701 | 0.6789 | 0.6881 | 0.6961 | 0.7030 | 0.7087 | 0.7131 | 0.7168 | 0.7211 | 0.7264 | 0.7320 | 0.7367 | 0.7403 | 0.7432 | 0.7473 | 0.7518 | 0.7568 | 0.7646 | 0.7726 |
| Brent                  | 0.6643 | 0.6713 | 0.6795 | 0.6881 | 0.6955 | 0.7019 | 0.7072 | 0.7111 | 0.7143 | 0.7183 | 0.7237 | 0.7300 | 0.7358 | 0.7411 | 0.7464 | 0.7525 | 0.7588 | 0.7652 | 0.7728 | 0.7788 |
| Hillingdon             | 0.6944 | 0.7017 | 0.7101 | 0.7189 | 0.7266 | 0.7332 | 0.7387 | 0.7428 | 0.7463 | 0.7504 | 0.7557 | 0.7618 | 0.7674 | 0.7721 | 0.7759 | 0.7801 | 0.7841 | 0.7880 | 0.7945 | 0.8013 |
| Havering               | 0.6458 | 0.6523 | 0.6598 | 0.6676 | 0.6745 | 0.6805 | 0.6856 | 0.6895 | 0.6931 | 0.6974 | 0.7027 | 0.7088 | 0.7145 | 0.7196 | 0.7242 | 0.7284 | 0.7320 | 0.7353 | 0.7403 | 0.7453 |
| Kingston upon Thames   | 0.6860 | 0.6929 | 0.7010 | 0.7095 | 0.7169 | 0.7233 | 0.7287 | 0.7329 | 0.7366 | 0.7409 | 0.7464 | 0.7524 | 0.7579 | 0.7623 | 0.7663 | 0.7700 | 0.7743 | 0.7793 | 0.7879 | 0.7962 |
| Sutton                 | 0.6505 | 0.6578 | 0.6662 | 0.6749 | 0.6826 | 0.6893 | 0.6950 | 0.6995 | 0.7035 | 0.7082 | 0.7138 | 0.7200 | 0.7257 | 0.7303 | 0.7336 | 0.7367 | 0.7394 | 0.7427 | 0.7490 | 0.7558 |
| Harrow                 | 0.6581 | 0.6653 | 0.6737 | 0.6823 | 0.6899 | 0.6963 | 0.7017 | 0.7058 | 0.7094 | 0.7137 | 0.7193 | 0.7256 | 0.7315 | 0.7366 | 0.7413 | 0.7453 | 0.7485 | 0.7514 | 0.7569 | 0.7636 |
| Enfield                | 0.6554 | 0.6625 | 0.6707 | 0.6793 | 0.6868 | 0.6932 | 0.6986 | 0.7027 | 0.7063 | 0.7106 | 0.7159 | 0.7220 | 0.7275 | 0.7322 | 0.7364 | 0.7409 | 0.7450 | 0.7486 | 0.7549 | 0.7612 |
| Croydon                | 0.6579 | 0.6653 | 0.6739 | 0.6829 | 0.6907 | 0.6974 | 0.7030 | 0.7073 | 0.7109 | 0.7152 | 0.7207 | 0.7268 | 0.7323 | 0.7371 | 0.7408 | 0.7451 | 0.7494 | 0.7534 | 0.7590 | 0.7651 |
| Hammersmith and Fulham | 0.7262 | 0.7329 | 0.7406 | 0.7486 | 0.7530 | 0.7572 | 0.7618 | 0.7667 | 0.7721 | 0.7779 | 0.7837 | 0.7893 | 0.7948 | 0.8006 | 0.8071 | 0.8140 | 0.8205 | 0.8259 | 0.8330 | 0.8406 |
| Ealing                 | 0.6728 | 0.6796 | 0.6876 | 0.6960 | 0.7032 | 0.7093 | 0.7142 | 0.7175 | 0.7203 | 0.7239 | 0.7293 | 0.7360 | 0.7428 | 0.7495 | 0.7571 | 0.7652 | 0.7727 | 0.7793 | 0.7863 | 0.7912 |
| Greenwich              | 0.6388 | 0.6461 | 0.6546 | 0.6635 | 0.6713 | 0.6779 | 0.6835 | 0.6876 | 0.6912 | 0.6954 | 0.7010 | 0.7074 | 0.7133 | 0.7186 | 0.7228 | 0.7273 | 0.7316 | 0.7351 | 0.7405 | 0.7462 |
| Wandsworth             | 0.6857 | 0.6928 | 0.7010 | 0.7096 | 0.7171 | 0.7235 | 0.7288 | 0.7327 | 0.7361 | 0.7402 | 0.7457 | 0.7521 | 0.7582 | 0.7641 | 0.7703 | 0.7771 | 0.7839 | 0.7909 | 0.7993 | 0.8076 |
| Waltham Forest         | 0.6210 | 0.6282 | 0.6365 | 0.6453 | 0.6529 | 0.6593 | 0.6645 | 0.6683 | 0.6715 | 0.6755 | 0.6810 | 0.6874 | 0.6935 | 0.6992 | 0.7047 | 0.7103 | 0.7152 | 0.7197 | 0.7264 | 0.7327 |
| Camden                 | 0.7727 | 0.7779 | 0.7813 | 0.7843 | 0.7874 | 0.7908 | 0.7943 | 0.7980 | 0.8018 | 0.8059 | 0.8102 | 0.8146 | 0.8188 | 0.8231 | 0.8278 | 0.8331 | 0.8384 | 0.8433 | 0.8476 | 0.8524 |
| Lambeth                | 0.6740 | 0.6817 | 0.6905 | 0.6997 | 0.7077 | 0.7146 | 0.7203 | 0.7245 | 0.7282 | 0.7326 | 0.7384 | 0.7451 | 0.7508 | 0.7559 | 0.7612 | 0.7663 | 0.7707 | 0.7734 | 0.7786 | 0.7866 |
| Lewisham               | 0.6397 | 0.6470 | 0.6553 | 0.6640 | 0.6716 | 0.6781 | 0.6836 | 0.6879 | 0.6917 | 0.6963 | 0.7019 | 0.7082 | 0.7139 | 0.7189 | 0.7238 | 0.7284 | 0.7323 | 0.7358 | 0.7408 | 0.7466 |
| Hounslow               | 0.6772 | 0.6856 | 0.6950 | 0.7048 | 0.7134 | 0.7209 | 0.7271 | 0.7319 | 0.7359 | 0.7402 | 0.7452 | 0.7499 | 0.7534 | 0.7548 | 0.7548 | 0.7571 | 0.7613 | 0.7657 | 0.7733 | 0.7841 |
| Southwark              | 0.6910 | 0.6986 | 0.7073 | 0.7164 | 0.7243 | 0.7311 | 0.7365 | 0.7404 | 0.7436 | 0.7477 | 0.7534 | 0.7603 | 0.7664 | 0.7723 | 0.7775 | 0.7823 | 0.7866 | 0.7909 | 0.7977 | 0.8059 |
| Newham                 | 0.6253 | 0.6335 | 0.6428 | 0.6525 | 0.6609 | 0.6681 | 0.6738 | 0.6779 | 0.6810 | 0.6848 | 0.6899 | 0.6957 | 0.7006 | 0.7045 | 0.7077 | 0.7118 | 0.7162 | 0.7217 | 0.7285 | 0.7339 |
| Barking and Dagenham   | 0.6302 | 0.6375 | 0.6459 | 0.6546 | 0.6623 | 0.6690 | 0.6747 | 0.6791 | 0.6829 | 0.6872 | 0.6923 | 0.6976 | 0.7021 | 0.7049 | 0.7072 | 0.7107 | 0.7150 | 0.7186 | 0.7238 | 0.7284 |
| Haringey               | 0.6626 | 0.6706 | 0.6797 | 0.6892 | 0.6975 | 0.7047 | 0.7108 | 0.7156 | 0.7198 | 0.7246 | 0.7304 | 0.7363 | 0.7414 | 0.7448 | 0.7465 | 0.7482 | 0.7502 | 0.7521 | 0.7575 | 0.7653 |
| Hackney                | 0.7065 | 0.7131 | 0.7210 | 0.7289 | 0.7360 | 0.7418 | 0.7459 | 0.7480 | 0.7490 | 0.7508 | 0.7549 | 0.7607 | 0.7662 | 0.7714 | 0.7771 | 0.7816 | 0.7843 | 0.7871 | 0.7937 | 0.8002 |
| Islington              | 0.7295 | 0.7368 | 0.7451 | 0.7537 | 0.7613 | 0.7679 | 0.7733 | 0.7773 | 0.7795 | 0.7820 | 0.7862 | 0.7917 | 0.7968 | 0.8017 | 0.8070 | 0.8125 | 0.8173 | 0.8214 | 0.8266 | 0.8312 |
| Tower Hamlets          | 0.6781 | 0.6857 | 0.6947 | 0.7036 | 0.7115 | 0.7178 | 0.7219 | 0.7234 | 0.7233 | 0.7239 | 0.7270 | 0.7321 | 0.7361 | 0.7404 | 0.7470 | 0.7569 | 0.7678 | 0.7771 | 0.7850 | 0.7902 |
| Wokingham              | 0.7060 | 0.7128 | 0.7205 | 0.7285 | 0.7352 | 0.7407 | 0.7447 | 0.7480 | 0.7505 | 0.7537 | 0.7580 | 0.7630 | 0.7680 | 0.7733 | 0.7783 | 0.7843 | 0.7904 | 0.7963 | 0.8026 | 0.8064 |
| Buckinghamshire        | 0.6865 | 0.6936 | 0.7019 | 0.7105 | 0.7176 | 0.7233 | 0.7277 | 0.7305 | 0.7327 | 0.7358 | 0.7405 | 0.7463 | 0.7523 | 0.7580 | 0.7633 | 0.7683 | 0.7727 | 0.7764 | 0.7812 | 0.7858 |
| Surrey                 | 0.6931 | 0.7003 | 0.7086 | 0.7172 | 0.7244 | 0.7303 | 0.7351 | 0.7385 | 0.7413 | 0.7448 | 0.7495 | 0.7547 | 0.7596 | 0.7636 | 0.7669 | 0.7701 | 0.7728 | 0.7754 | 0.7807 | 0.7867 |
| Windsor and Maidenhead | 0.7020 | 0.7095 | 0.7182 | 0.7271 | 0.7346 | 0.7407 | 0.7457 | 0.7492 | 0.7522 | 0.7558 | 0.7604 | 0.7656 | 0.7700 | 0.7736 | 0.7763 | 0.7792 | 0.7816 | 0.7830 | 0.7857 | 0.7904 |
| West Berkshire         | 0.6961 | 0.7041 | 0.7133 | 0.7227 | 0.7306 | 0.7369 | 0.7418 | 0.7449 | 0.7473 | 0.7502 | 0.7547 | 0.7601 | 0.7652 | 0.7696 | 0.7745 | 0.7801 | 0.7860 | 0.7914 | 0.7976 | 0.8033 |
| Hampshire              | 0.6694 | 0.6768 | 0.6853 | 0.6940 | 0.7013 | 0.7072 | 0.7117 | 0.7147 | 0.7170 | 0.7202 | 0.7250 | 0.7308 | 0.7366 | 0.7422 | 0.7472 | 0.7520 | 0.7561 | 0.7601 | 0.7657 | 0.7709 |
| Bracknell Forest       | 0.6803 | 0.6874 | 0.6957 | 0.7043 | 0.7114 | 0.7171 | 0.7213 | 0.7238 | 0.7257 | 0.7285 | 0.7333 | 0.7397 | 0.7463 | 0.7532 | 0.7596 | 0.7657 | 0.7713 | 0.7766 | 0.7840 | 0.7911 |
| West Sussex            | 0.6637 | 0.6709 | 0.6793 | 0.6879 | 0.6951 | 0.7010 | 0.7056 | 0.7088 | 0.7115 | 0.7150 | 0.7198 | 0.7257 | 0.7313 | 0.7366 | 0.7412 | 0.7459 | 0.7499 | 0.7534 | 0.7585 | 0.7636 |



| Appendix Table 5A. SDI Values by location, 1970-1989 |        |        |        |        |        |        |        |        |        |        |        |        |        |        |        |        |        |        |        |        |
|------------------------------------------------------|--------|--------|--------|--------|--------|--------|--------|--------|--------|--------|--------|--------|--------|--------|--------|--------|--------|--------|--------|--------|
| Location                                             | 1970   | 1971   | 1972   | 1973   | 1974   | 1975   | 1976   | 1977   | 1978   | 1979   | 1980   | 1981   | 1982   | 1983   | 1984   | 1985   | 1986   | 1987   | 1988   | 1989   |
| Oxfordshire                                          | 0.6910 | 0.6980 | 0.7060 | 0.7143 | 0.7212 | 0.7268 | 0.7313 | 0.7343 | 0.7368 | 0.7402 | 0.7449 | 0.7507 | 0.7565 | 0.7621 | 0.7674 | 0.7731 | 0.7780 | 0.7815 | 0.7859 | 0.7901 |
| Reading                                              | 0.6916 | 0.6997 | 0.7089 | 0.7183 | 0.7264 | 0.7330 | 0.7382 | 0.7418 | 0.7447 | 0.7483 | 0.7533 | 0.7590 | 0.7643 | 0.7687 | 0.7719 | 0.7752 | 0.7791 | 0.7834 | 0.7903 | 0.7978 |
| Kent                                                 | 0.6525 | 0.6599 | 0.6685 | 0.6774 | 0.6848 | 0.6909 | 0.6958 | 0.6992 | 0.7021 | 0.7057 | 0.7105 | 0.7160 | 0.7212 | 0.7255 | 0.7291 | 0.7326 | 0.7360 | 0.7395 | 0.7449 | 0.7500 |
| Brighton and Hove                                    | 0.6686 | 0.6763 | 0.6850 | 0.6939 | 0.7015 | 0.7078 | 0.7130 | 0.7171 | 0.7208 | 0.7250 | 0.7299 | 0.7351 | 0.7397 | 0.7431 | 0.7453 | 0.7477 | 0.7508 | 0.7550 | 0.7631 | 0.7715 |
| Medway                                               | 0.6272 | 0.6350 | 0.6441 | 0.6533 | 0.6611 | 0.6674 | 0.6722 | 0.6754 | 0.6778 | 0.6810 | 0.6858 | 0.6914 | 0.6966 | 0.7013 | 0.7056 | 0.7105 | 0.7154 | 0.7202 | 0.7266 | 0.7328 |
| East Sussex                                          | 0.6414 | 0.6485 | 0.6566 | 0.6650 | 0.6720 | 0.6778 | 0.6823 | 0.6854 | 0.6880 | 0.6914 | 0.6962 | 0.7019 | 0.7076 | 0.7129 | 0.7180 | 0.7231 | 0.7276 | 0.7318 | 0.7370 | 0.7417 |
| Portsmouth                                           | 0.6620 | 0.6704 | 0.6799 | 0.6897 | 0.6981 | 0.7051 | 0.7109 | 0.7152 | 0.7188 | 0.7230 | 0.7285 | 0.7345 | 0.7395 | 0.7436 | 0.7455 | 0.7481 | 0.7505 | 0.7541 | 0.7603 | 0.7683 |
| Isle of Wight                                        | 0.6408 | 0.6478 | 0.6559 | 0.6642 | 0.6712 | 0.6768 | 0.6813 | 0.6844 | 0.6870 | 0.6903 | 0.6950 | 0.7005 | 0.7056 | 0.7102 | 0.7144 | 0.7191 | 0.7245 | 0.7303 | 0.7369 | 0.7415 |
| Milton Keynes                                        | 0.6901 | 0.6990 | 0.7092 | 0.7195 | 0.7283 | 0.7356 | 0.7416 | 0.7461 | 0.7497 | 0.7534 | 0.7573 | 0.7608 | 0.7624 | 0.7620 | 0.7629 | 0.7681 | 0.7754 | 0.7826 | 0.7899 | 0.7947 |
| Southampton                                          | 0.6651 | 0.6731 | 0.6823 | 0.6917 | 0.6997 | 0.7063 | 0.7117 | 0.7155 | 0.7188 | 0.7228 | 0.7280 | 0.7338 | 0.7387 | 0.7429 | 0.7455 | 0.7477 | 0.7489 | 0.7497 | 0.7539 | 0.7613 |
| Slough                                               | 0.6830 | 0.6922 | 0.7026 | 0.7131 | 0.7221 | 0.7295 | 0.7351 | 0.7389 | 0.7416 | 0.7446 | 0.7487 | 0.7530 | 0.7560 | 0.7574 | 0.7585 | 0.7618 | 0.7660 | 0.7707 | 0.7790 | 0.7870 |
| South Gloucestershire                                | 0.6688 | 0.6767 | 0.6856 | 0.6947 | 0.7025 | 0.7090 | 0.7144 | 0.7184 | 0.7218 | 0.7258 | 0.7309 | 0.7365 | 0.7419 | 0.7469 | 0.7514 | 0.7564 | 0.7615 | 0.7668 | 0.7736 | 0.7791 |
| Dorset                                               | 0.6431 | 0.6508 | 0.6595 | 0.6685 | 0.6760 | 0.6823 | 0.6876 | 0.6916 | 0.6950 | 0.6992 | 0.7043 | 0.7100 | 0.7154 | 0.7205 | 0.7256 | 0.7311 | 0.7366 | 0.7417 | 0.7474 | 0.7515 |
| Wiltshire                                            | 0.6513 | 0.6593 | 0.6683 | 0.6777 | 0.6856 | 0.6921 | 0.6973 | 0.7011 | 0.7042 | 0.7081 | 0.7133 | 0.7192 | 0.7253 | 0.7309 | 0.7359 | 0.7409 | 0.7458 | 0.7503 | 0.7561 | 0.7611 |
| North Somerset                                       | 0.6361 | 0.6435 | 0.6519 | 0.6607 | 0.6680 | 0.6740 | 0.6790 | 0.6826 | 0.6858 | 0.6897 | 0.6950 | 0.7014 | 0.7077 | 0.7142 | 0.7208 | 0.7274 | 0.7335 | 0.7396 | 0.7459 | 0.7505 |
| Devon                                                | 0.6376 | 0.6455 | 0.6544 | 0.6636 | 0.6713 | 0.6779 | 0.6834 | 0.6876 | 0.6913 | 0.6956 | 0.7009 | 0.7067 | 0.7122 | 0.7171 | 0.7214 | 0.7263 | 0.7312 | 0.7362 | 0.7425 | 0.7481 |
| Poole                                                | 0.6440 | 0.6523 | 0.6616 | 0.6712 | 0.6794 | 0.6862 | 0.6917 | 0.6957 | 0.6990 | 0.7030 | 0.7081 | 0.7138 | 0.7190 | 0.7240 | 0.7287 | 0.7345 | 0.7410 | 0.7476 | 0.7548 | 0.7611 |
| Bath and North East Somerset                         | 0.6581 | 0.6660 | 0.6747 | 0.6838 | 0.6915 | 0.6981 | 0.7025 | 0.7070 | 0.7120 | 0.7168 | 0.7221 | 0.7272 | 0.7320 | 0.7367 | 0.7404 | 0.7451 | 0.7502 | 0.7557 | 0.7622 | 0.7676 |
| Gloucestershire                                      | 0.6541 | 0.6620 | 0.6709 | 0.6801 | 0.6879 | 0.6944 | 0.6998 | 0.7037 | 0.7071 | 0.7112 | 0.7164 | 0.7223 | 0.7279 | 0.7333 | 0.7382 | 0.7436 | 0.7489 | 0.7539 | 0.7600 | 0.7653 |
| Somerset                                             | 0.6388 | 0.6466 | 0.6556 | 0.6648 | 0.6726 | 0.6791 | 0.6844 | 0.6883 | 0.6917 | 0.6958 | 0.7012 | 0.7075 | 0.7136 | 0.7194 | 0.7249 | 0.7302 | 0.7344 | 0.7381 | 0.7433 | 0.7481 |
| Swindon                                              | 0.6720 | 0.6802 | 0.6894 | 0.6989 | 0.7071 | 0.7139 | 0.7195 | 0.7236 | 0.7270 | 0.7311 | 0.7362 | 0.7420 | 0.7476 | 0.7527 | 0.7567 | 0.7612 | 0.7656 | 0.7704 | 0.7772 | 0.7837 |
| Torbay                                               | 0.6204 | 0.6282 | 0.6370 | 0.6461 | 0.6538 | 0.6603 | 0.6658 | 0.6700 | 0.6738 | 0.6783 | 0.6838 | 0.6900 | 0.6957 | 0.7010 | 0.7059 | 0.7109 | 0.7155 | 0.7207 | 0.7275 | 0.7336 |
| Bristol, City of                                     | 0.6702 | 0.6786 | 0.6881 | 0.6978 | 0.7061 | 0.7133 | 0.7193 | 0.7240 | 0.7282 | 0.7328 | 0.7383 | 0.7440 | 0.7491 | 0.7532 | 0.7561 | 0.7593 | 0.7625 | 0.7657 | 0.7715 | 0.7785 |
| Bournemouth                                          | 0.6424 | 0.6502 | 0.6587 | 0.6676 | 0.6752 | 0.6806 | 0.6849 | 0.6894 | 0.6944 | 0.6997 | 0.7049 | 0.7097 | 0.7148 | 0.7201 | 0.7259 | 0.7318 | 0.7371 | 0.7415 | 0.7466 | 0.7519 |
| Cornwall                                             | 0.6215 | 0.6296 | 0.6387 | 0.6481 | 0.6560 | 0.6626 | 0.6679 | 0.6719 | 0.6753 | 0.6794 | 0.6848 | 0.6909 | 0.6969 | 0.7025 | 0.7078 | 0.7131 | 0.7180 | 0.7228 | 0.7293 | 0.7348 |
| Plymouth                                             | 0.6326 | 0.6409 | 0.6502 | 0.6599 | 0.6681 | 0.6750 | 0.6807 | 0.6849 | 0.6885 | 0.6929 | 0.6986 | 0.7050 | 0.7113 | 0.7176 | 0.7234 | 0.7292 | 0.7356 | 0.7407 | 0.7471 | 0.7520 |
| North East England                                   | 0.6128 | 0.6214 | 0.6314 | 0.6418 | 0.6505 | 0.6575 | 0.6632 | 0.6674 | 0.6711 | 0.6755 | 0.6810 | 0.6868 | 0.6923 | 0.6976 | 0.7024 | 0.7080 | 0.7137 | 0.7196 | 0.7265 | 0.7324 |
| North West England                                   | 0.6272 | 0.6357 | 0.6456 | 0.6559 | 0.6646 | 0.6717 | 0.6773 | 0.6813 | 0.6846 | 0.6884 | 0.6933 | 0.6988 | 0.7041 | 0.7091 | 0.7137 | 0.7190 | 0.7241 | 0.7291 | 0.7352 | 0.7407 |
| Yorkshire and the Humber                             | 0.6245 | 0.6326 | 0.6421 | 0.6520 | 0.6603 | 0.6672 | 0.6728 | 0.6769 | 0.6803 | 0.6844 | 0.6896 | 0.6953 | 0.7008 | 0.7060 | 0.7107 | 0.7160 | 0.7211 | 0.7262 | 0.7326 | 0.7385 |
| East Midlands                                        | 0.6280 | 0.6358 | 0.6447 | 0.6538 | 0.6616 | 0.6680 | 0.6733 | 0.6773 | 0.6808 | 0.6852 | 0.6907 | 0.6970 | 0.7031 | 0.7087 | 0.7139 | 0.7194 | 0.7246 | 0.7296 | 0.7357 | 0.7411 |
| West Midlands                                        | 0.6227 | 0.6310 | 0.6406 | 0.6506 | 0.6590 | 0.6660 | 0.6716 | 0.6757 | 0.6790 | 0.6829 | 0.6880 | 0.6935 | 0.6989 | 0.7040 | 0.7087 | 0.7140 | 0.7191 | 0.7240 | 0.7301 | 0.7357 |
| East of England                                      | 0.6490 | 0.6570 | 0.6661 | 0.6753 | 0.6831 | 0.6896 | 0.6948 | 0.6985 | 0.7017 | 0.7055 | 0.7107 | 0.7165 | 0.7221 | 0.7271 | 0.7315 | 0.7362 | 0.7405 | 0.7447 | 0.7506 | 0.7565 |
| Greater London                                       | 0.6927 | 0.6998 | 0.7079 | 0.7164 | 0.7238 | 0.7301 | 0.7353 | 0.7391 | 0.7423 | 0.7463 | 0.7515 | 0.7574 | 0.7629 | 0.7679 | 0.7724 | 0.7771 | 0.7817 | 0.7860 | 0.7923 | 0.7994 |
| South East England                                   | 0.6722 | 0.6797 | 0.6882 | 0.6970 | 0.7044 | 0.7104 | 0.7152 | 0.7185 | 0.7213 | 0.7247 | 0.7295 | 0.7351 | 0.7403 | 0.7450 | 0.7491 | 0.7534 | 0.7574 | 0.7611 | 0.7666 | 0.7720 |
| South West England                                   | 0.6476 | 0.6555 | 0.6645 | 0.6737 | 0.6816 | 0.6881 | 0.6935 | 0.6976 | 0.7011 | 0.7053 | 0.7105 | 0.7164 | 0.7221 | 0.7273 | 0.7320 | 0.7370 | 0.7420 | 0.7467 | 0.7527 | 0.7581 |
| Southern Latin America                               | 0.5612 | 0.5634 | 0.5673 | 0.5715 | 0.5759 | 0.5798 | 0.5848 | 0.5896 | 0.5915 | 0.5945 | 0.5994 | 0.6037 | 0.6070 | 0.6126 | 0.6176 | 0.6208 | 0.6266 | 0.6306 | 0.6341 | 0.6372 |
| Argentina                                            | 0.5727 | 0.5740 | 0.5769 | 0.5795 | 0.5811 | 0.5822 | 0.5846 | 0.5879 | 0.5878 | 0.5891 | 0.5953 | 0.6004 | 0.6022 | 0.6076 | 0.6134 | 0.6165 | 0.6237 | 0.6291 | 0.6335 | 0.6361 |
| Chile                                                | 0.5323 | 0.5358 | 0.5426 | 0.5525 | 0.5640 | 0.5746 | 0.5853 | 0.5932 | 0.5982 | 0.6018 | 0.6033 | 0.6062 | 0.6130 | 0.6193 | 0.6232 | 0.6270 | 0.6300 | 0.6311 | 0.6329 | 0.6378 |
| Uruguay                                              | 0.5551 | 0.5602 | 0.5644 | 0.5651 | 0.5700 | 0.5726 | 0.5772 | 0.5820 | 0.5894 | 0.6030 | 0.6103 | 0.6150 | 0.6186 | 0.6216 | 0.6237 | 0.6256 | 0.6290 | 0.6321 | 0.6350 | 0.6384 |
| High-income North America                            | 0.7785 | 0.7927 | 0.8050 | 0.8125 | 0.8179 | 0.8227 | 0.8256 | 0.8286 | 0.8317 | 0.8333 | 0.8360 | 0.8392 | 0.8419 | 0.8449 | 0.8468 | 0.8489 | 0.8514 | 0.8522 | 0.8518 | 0.8509 |
| Canada                                               | 0.7506 | 0.7624 | 0.7720 | 0.7791 | 0.7843 | 0.7893 | 0.7950 | 0.8008 | 0.8057 | 0.8099 | 0.8148 | 0.8196 | 0.8232 | 0.8264 | 0.8300 | 0.8340 | 0.8387 | 0.8427 | 0.8445 | 0.8453 |
| United States                                        | 0.7813 | 0.7957 | 0.8084 | 0.8159 | 0.8214 | 0.8262 | 0.8288 | 0.8315 | 0.8344 | 0.8357 | 0.8381 | 0.8412 | 0.8438 | 0.8469 | 0.8485 | 0.8504 | 0.8526 | 0.8531 | 0.8524 | 0.8514 |
| Greenland                                            | 0.5906 | 0.6200 | 0.6462 | 0.6690 | 0.6880 | 0.7028 | 0.7144 | 0.7228 | 0.7271 | 0.7291 | 0.7327 | 0.7388 | 0.7453 | 0.7499 | 0.7516 | 0.7535 | 0.7553 | 0.7554 | 0.7539 | 0.7523 |
| Alabama                                              | 0.7345 | 0.7507 | 0.7650 | 0.7739 | 0.7808 | 0.7871 | 0.7914 | 0.7958 | 0.8004 | 0.8035 | 0.8077 | 0.8124 | 0.8164 | 0.8204 | 0.8229 | 0.8256 | 0.8284 | 0.8295 | 0.8295 | 0.8295 |
| Alaska                                               | 0.7688 | 0.7917 | 0.8105 | 0.8216 | 0.8315 | 0.8430 | 0.8506 | 0.8550 | 0.8562 | 0.8524 | 0.8485 | 0.8445 | 0.8429 | 0.8436 | 0.8432 | 0.8459 | 0.8502 | 0.8515 | 0.8501 | 0.8468 |
| Arizona                                              | 0.7681 | 0.7859 | 0.8014 | 0.8105 | 0.8169 | 0.8216 | 0.8233 | 0.8249 | 0.8270 | 0.8275 | 0.8295 | 0.8321 | 0.8339 | 0.8359 | 0.8360 | 0.8369 | 0.8391 | 0.8399 | 0.8394 | 0.8376 |
| Arkansas                                             | 0.7218 | 0.7388 | 0.7540 | 0.7642 | 0.7720 | 0.7788 | 0.7830 | 0.7874 | 0.7923 | 0.7951 | 0.7989 | 0.8034 | 0.8072 | 0.8111 | 0.8137 | 0.8164 | 0.8192 | 0.8200 | 0.8199 | 0.8198 |
| California                                           | 0.8052 | 0.8188 | 0.8305 | 0.8367 | 0.8411 | 0.8448 | 0.8464 | 0.8480 | 0.8497 | 0.8498 | 0.8509 | 0.8525 | 0.8540 | 0.8557 | 0.8557 | 0.8558 | 0.8563 | 0.8541 | 0.8495 | 0.8436 |
| Colorado                                             | 0.7974 | 0.8130 | 0.8270 | 0.8357 | 0.8422 | 0.8476 | 0.8505 | 0.8532 | 0.8559 | 0.8569 | 0.8588 | 0.8610 | 0.8627 | 0.8645 | 0.8651 | 0.8665 | 0.8687 | 0.8697 | 0.8697 | 0.8693 |

**Appendix Table 5A. SDI Values by location, 1970-1989**

| Location                    | 1970   | 1971   | 1972   | 1973   | 1974   | 1975   | 1976   | 1977   | 1978   | 1979   | 1980   | 1981   | 1982   | 1983   | 1984   | 1985   | 1986   | 1987   | 1988   | 1989   |
|-----------------------------|--------|--------|--------|--------|--------|--------|--------|--------|--------|--------|--------|--------|--------|--------|--------|--------|--------|--------|--------|--------|
| Connecticut                 | 0.8218 | 0.8339 | 0.8445 | 0.8508 | 0.8541 | 0.8564 | 0.8589 | 0.8617 | 0.8647 | 0.8677 | 0.8702 | 0.8729 | 0.8751 | 0.8777 | 0.8792 | 0.8809 | 0.8833 | 0.8848 | 0.8859 | 0.8869 |
| Delaware                    | 0.8087 | 0.8211 | 0.8321 | 0.8383 | 0.8425 | 0.8461 | 0.8477 | 0.8493 | 0.8512 | 0.8518 | 0.8540 | 0.8569 | 0.8593 | 0.8618 | 0.8629 | 0.8646 | 0.8667 | 0.8672 | 0.8663 | 0.8656 |
| District of Columbia        | 0.8348 | 0.8463 | 0.8566 | 0.8615 | 0.8643 | 0.8670 | 0.8699 | 0.8729 | 0.8759 | 0.8786 | 0.8806 | 0.8827 | 0.8844 | 0.8860 | 0.8874 | 0.8880 | 0.8888 | 0.8867 | 0.8818 | 0.8756 |
| Florida                     | 0.7841 | 0.7997 | 0.8135 | 0.8224 | 0.8290 | 0.8341 | 0.8366 | 0.8388 | 0.8411 | 0.8417 | 0.8434 | 0.8455 | 0.8470 | 0.8491 | 0.8499 | 0.8512 | 0.8529 | 0.8529 | 0.8519 | 0.8514 |
| Georgia                     | 0.7496 | 0.7657 | 0.7801 | 0.7890 | 0.7955 | 0.8010 | 0.8045 | 0.8082 | 0.8125 | 0.8154 | 0.8198 | 0.8246 | 0.8285 | 0.8323 | 0.8345 | 0.8370 | 0.8399 | 0.8410 | 0.8409 | 0.8407 |
| Hawaii                      | 0.7807 | 0.7999 | 0.8160 | 0.8253 | 0.8322 | 0.8378 | 0.8401 | 0.8417 | 0.8429 | 0.8422 | 0.8430 | 0.8438 | 0.8451 | 0.8481 | 0.8498 | 0.8521 | 0.8547 | 0.8551 | 0.8540 | 0.8528 |
| Idaho                       | 0.7421 | 0.7616 | 0.7786 | 0.7883 | 0.7957 | 0.8013 | 0.8036 | 0.8055 | 0.8076 | 0.8071 | 0.8092 | 0.8125 | 0.8164 | 0.8218 | 0.8252 | 0.8289 | 0.8326 | 0.8339 | 0.8335 | 0.8324 |
| Illinois                    | 0.7854 | 0.8000 | 0.8127 | 0.8201 | 0.8255 | 0.8303 | 0.8329 | 0.8357 | 0.8387 | 0.8401 | 0.8428 | 0.8462 | 0.8493 | 0.8524 | 0.8540 | 0.8557 | 0.8575 | 0.8575 | 0.8564 | 0.8549 |
| Indiana                     | 0.7798 | 0.7929 | 0.8044 | 0.8115 | 0.8162 | 0.8202 | 0.8226 | 0.8253 | 0.8285 | 0.8302 | 0.8332 | 0.8367 | 0.8396 | 0.8426 | 0.8445 | 0.8463 | 0.8484 | 0.8487 | 0.8477 | 0.8467 |
| Iowa                        | 0.7740 | 0.7886 | 0.8019 | 0.8106 | 0.8163 | 0.8214 | 0.8239 | 0.8267 | 0.8303 | 0.8317 | 0.8344 | 0.8382 | 0.8415 | 0.8451 | 0.8477 | 0.8504 | 0.8532 | 0.8543 | 0.8538 | 0.8532 |
| Kansas                      | 0.7720 | 0.7885 | 0.8031 | 0.8121 | 0.8184 | 0.8239 | 0.8266 | 0.8292 | 0.8318 | 0.8329 | 0.8353 | 0.8387 | 0.8422 | 0.8460 | 0.8482 | 0.8507 | 0.8539 | 0.8553 | 0.8556 | 0.8552 |
| Kentucky                    | 0.7373 | 0.7528 | 0.7663 | 0.7749 | 0.7815 | 0.7873 | 0.7910 | 0.7950 | 0.7990 | 0.8017 | 0.8053 | 0.8096 | 0.8138 | 0.8181 | 0.8213 | 0.8242 | 0.8269 | 0.8281 | 0.8285 | 0.8285 |
| Louisiana                   | 0.7177 | 0.7363 | 0.7521 | 0.7614 | 0.7687 | 0.7755 | 0.7798 | 0.7842 | 0.7888 | 0.7916 | 0.7960 | 0.8013 | 0.8062 | 0.8111 | 0.8141 | 0.8174 | 0.8205 | 0.8217 | 0.8219 | 0.8218 |
| Maine                       | 0.7753 | 0.7895 | 0.8019 | 0.8094 | 0.8151 | 0.8198 | 0.8230 | 0.8260 | 0.8287 | 0.8298 | 0.8318 | 0.8340 | 0.8361 | 0.8391 | 0.8411 | 0.8439 | 0.8476 | 0.8504 | 0.8526 | 0.8546 |
| Maryland                    | 0.8067 | 0.8217 | 0.8349 | 0.8432 | 0.8494 | 0.8544 | 0.8577 | 0.8605 | 0.8631 | 0.8639 | 0.8652 | 0.8665 | 0.8678 | 0.8698 | 0.8708 | 0.8724 | 0.8746 | 0.8754 | 0.8754 | 0.8754 |
| Massachusetts               | 0.8178 | 0.8300 | 0.8407 | 0.8456 | 0.8486 | 0.8511 | 0.8537 | 0.8564 | 0.8594 | 0.8623 | 0.8652 | 0.8681 | 0.8707 | 0.8738 | 0.8772 | 0.8796 | 0.8824 | 0.8843 | 0.8856 | 0.8864 |
| Michigan                    | 0.7893 | 0.8027 | 0.8147 | 0.8219 | 0.8268 | 0.8309 | 0.8335 | 0.8367 | 0.8402 | 0.8421 | 0.8448 | 0.8474 | 0.8493 | 0.8515 | 0.8527 | 0.8545 | 0.8567 | 0.8569 | 0.8558 | 0.8545 |
| Minnesota                   | 0.7785 | 0.7920 | 0.8042 | 0.8119 | 0.8174 | 0.8223 | 0.8252 | 0.8288 | 0.8328 | 0.8354 | 0.8392 | 0.8438 | 0.8480 | 0.8524 | 0.8557 | 0.8593 | 0.8633 | 0.8657 | 0.8668 | 0.8677 |
| Mississippi                 | 0.7031 | 0.7221 | 0.7390 | 0.7495 | 0.7572 | 0.7637 | 0.7679 | 0.7722 | 0.7765 | 0.7793 | 0.7836 | 0.7889 | 0.7938 | 0.7990 | 0.8026 | 0.8063 | 0.8098 | 0.8113 | 0.8114 | 0.8112 |
| Missouri                    | 0.7667 | 0.7816 | 0.7946 | 0.8023 | 0.8076 | 0.8124 | 0.8150 | 0.8180 | 0.8212 | 0.8230 | 0.8259 | 0.8295 | 0.8329 | 0.8367 | 0.8392 | 0.8419 | 0.8450 | 0.8464 | 0.8464 | 0.8460 |
| Montana                     | 0.7669 | 0.7834 | 0.7985 | 0.8079 | 0.8147 | 0.8204 | 0.8230 | 0.8254 | 0.8282 | 0.8282 | 0.8295 | 0.8314 | 0.8336 | 0.8367 | 0.8382 | 0.8403 | 0.8432 | 0.8445 | 0.8443 | 0.8441 |
| Nebraska                    | 0.7710 | 0.7871 | 0.8013 | 0.8101 | 0.8160 | 0.8216 | 0.8240 | 0.8263 | 0.8292 | 0.8298 | 0.8316 | 0.8349 | 0.8384 | 0.8423 | 0.8451 | 0.8484 | 0.8518 | 0.8534 | 0.8536 | 0.8533 |
| Nevada                      | 0.8175 | 0.8296 | 0.8399 | 0.8450 | 0.8482 | 0.8507 | 0.8513 | 0.8523 | 0.8539 | 0.8538 | 0.8549 | 0.8566 | 0.8582 | 0.8601 | 0.8600 | 0.8599 | 0.8597 | 0.8573 | 0.8537 | 0.8500 |
| New Hampshire               | 0.7958 | 0.8093 | 0.8212 | 0.8284 | 0.8334 | 0.8377 | 0.8403 | 0.8433 | 0.8468 | 0.8491 | 0.8524 | 0.8561 | 0.8591 | 0.8623 | 0.8639 | 0.8658 | 0.8687 | 0.8711 | 0.8733 | 0.8755 |
| New Jersey                  | 0.8038 | 0.8172 | 0.8289 | 0.8360 | 0.8412 | 0.8457 | 0.8483 | 0.8510 | 0.8538 | 0.8554 | 0.8580 | 0.8610 | 0.8637 | 0.8667 | 0.8684 | 0.8700 | 0.8720 | 0.8726 | 0.8726 | 0.8728 |
| New Mexico                  | 0.7418 | 0.7604 | 0.7765 | 0.7855 | 0.7923 | 0.7984 | 0.8015 | 0.8045 | 0.8074 | 0.8078 | 0.8094 | 0.8115 | 0.8141 | 0.8176 | 0.8194 | 0.8221 | 0.8251 | 0.8261 | 0.8255 | 0.8241 |
| New York                    | 0.8072 | 0.8200 | 0.8311 | 0.8375 | 0.8420 | 0.8460 | 0.8478 | 0.8497 | 0.8516 | 0.8522 | 0.8538 | 0.8560 | 0.8581 | 0.8607 | 0.8623 | 0.8638 | 0.8658 | 0.8663 | 0.8662 | 0.8661 |
| North Carolina              | 0.7615 | 0.7759 | 0.7889 | 0.7975 | 0.8039 | 0.8094 | 0.8131 | 0.8166 | 0.8203 | 0.8224 | 0.8255 | 0.8290 | 0.8319 | 0.8351 | 0.8373 | 0.8395 | 0.8417 | 0.8422 | 0.8418 | 0.8415 |
| North Dakota                | 0.7393 | 0.7587 | 0.7773 | 0.7926 | 0.8023 | 0.8097 | 0.8124 | 0.8145 | 0.8177 | 0.8170 | 0.8162 | 0.8185 | 0.8218 | 0.8266 | 0.8303 | 0.8345 | 0.8393 | 0.8421 | 0.8424 | 0.8434 |
| Ohio                        | 0.7855 | 0.7988 | 0.8105 | 0.8173 | 0.8223 | 0.8264 | 0.8286 | 0.8312 | 0.8340 | 0.8354 | 0.8380 | 0.8410 | 0.8436 | 0.8466 | 0.8484 | 0.8504 | 0.8526 | 0.8533 | 0.8529 | 0.8523 |
| Oklahoma                    | 0.7537 | 0.7712 | 0.7861 | 0.7951 | 0.8018 | 0.8076 | 0.8106 | 0.8135 | 0.8162 | 0.8174 | 0.8200 | 0.8236 | 0.8280 | 0.8328 | 0.8362 | 0.8398 | 0.8430 | 0.8437 | 0.8432 | 0.8422 |
| Oregon                      | 0.7914 | 0.8059 | 0.8186 | 0.8261 | 0.8317 | 0.8366 | 0.8395 | 0.8425 | 0.8457 | 0.8474 | 0.8499 | 0.8525 | 0.8544 | 0.8566 | 0.8572 | 0.8579 | 0.8590 | 0.8583 | 0.8568 | 0.8555 |
| Pennsylvania                | 0.7860 | 0.7994 | 0.8112 | 0.8184 | 0.8239 | 0.8288 | 0.8318 | 0.8349 | 0.8380 | 0.8396 | 0.8420 | 0.8448 | 0.8473 | 0.8500 | 0.8514 | 0.8529 | 0.8549 | 0.8557 | 0.8558 | 0.8560 |
| Rhode Island                | 0.7982 | 0.8107 | 0.8217 | 0.8282 | 0.8322 | 0.8343 | 0.8369 | 0.8396 | 0.8425 | 0.8449 | 0.8475 | 0.8506 | 0.8533 | 0.8565 | 0.8587 | 0.8608 | 0.8631 | 0.8643 | 0.8648 | 0.8652 |
| South Carolina              | 0.7416 | 0.7584 | 0.7732 | 0.7827 | 0.7900 | 0.7962 | 0.8002 | 0.8039 | 0.8077 | 0.8100 | 0.8135 | 0.8176 | 0.8212 | 0.8252 | 0.8278 | 0.8302 | 0.8326 | 0.8329 | 0.8320 | 0.8314 |
| South Dakota                | 0.7336 | 0.7522 | 0.7694 | 0.7812 | 0.7886 | 0.7948 | 0.7967 | 0.7994 | 0.8028 | 0.8041 | 0.8064 | 0.8103 | 0.8141 | 0.8185 | 0.8219 | 0.8254 | 0.8295 | 0.8318 | 0.8322 | 0.8320 |
| Tennessee                   | 0.7514 | 0.7660 | 0.7792 | 0.7877 | 0.7941 | 0.7996 | 0.8033 | 0.8071 | 0.8113 | 0.8140 | 0.8177 | 0.8218 | 0.8252 | 0.8288 | 0.8311 | 0.8333 | 0.8355 | 0.8363 | 0.8359 | 0.8354 |
| Texas                       | 0.7439 | 0.7619 | 0.7774 | 0.7866 | 0.7935 | 0.7999 | 0.8035 | 0.8069 | 0.8104 | 0.8121 | 0.8151 | 0.8191 | 0.8228 | 0.8266 | 0.8286 | 0.8310 | 0.8338 | 0.8344 | 0.8337 | 0.8321 |
| Utah                        | 0.7124 | 0.7361 | 0.7556 | 0.7643 | 0.7697 | 0.7743 | 0.7746 | 0.7753 | 0.7768 | 0.7758 | 0.7793 | 0.7858 | 0.7940 | 0.8031 | 0.8089 | 0.8142 | 0.8189 | 0.8203 | 0.8198 | 0.8194 |
| Vermont                     | 0.7863 | 0.8013 | 0.8144 | 0.8220 | 0.8273 | 0.8317 | 0.8342 | 0.8365 | 0.8392 | 0.8404 | 0.8427 | 0.8455 | 0.8481 | 0.8510 | 0.8529 | 0.8554 | 0.8588 | 0.8615 | 0.8635 | 0.8657 |
| Virginia                    | 0.7841 | 0.7991 | 0.8123 | 0.8207 | 0.8272 | 0.8328 | 0.8364 | 0.8400 | 0.8437 | 0.8458 | 0.8488 | 0.8520 | 0.8547 | 0.8577 | 0.8596 | 0.8617 | 0.8644 | 0.8657 | 0.8663 | 0.8666 |
| Washington                  | 0.8026 | 0.8164 | 0.8282 | 0.8349 | 0.8400 | 0.8447 | 0.8470 | 0.8495 | 0.8525 | 0.8540 | 0.8566 | 0.8595 | 0.8619 | 0.8646 | 0.8656 | 0.8669 | 0.8689 | 0.8691 | 0.8681 | 0.8668 |
| West Virginia               | 0.7430 | 0.7579 | 0.7709 | 0.7787 | 0.7846 | 0.7901 | 0.7939 | 0.7979 | 0.8021 | 0.8049 | 0.8090 | 0.8134 | 0.8176 | 0.8217 | 0.8243 | 0.8270 | 0.8296 | 0.8306 | 0.8308 | 0.8305 |
| Wisconsin                   | 0.7760 | 0.7908 | 0.8038 | 0.8116 | 0.8173 | 0.8223 | 0.8251 | 0.8284 | 0.8317 | 0.8335 | 0.8364 | 0.8395 | 0.8422 | 0.8453 | 0.8473 | 0.8497 | 0.8530 | 0.8551 | 0.8560 | 0.8567 |
| Wyoming                     | 0.7474 | 0.7685 | 0.7864 | 0.7968 | 0.8049 | 0.8118 | 0.8150 | 0.8182 | 0.8215 | 0.8221 | 0.8242 | 0.8270 | 0.8305 | 0.8347 | 0.8372 | 0.8416 | 0.8474 | 0.8505 | 0.8511 | 0.8506 |
| Latin America and Caribbean | 0.3769 | 0.3846 | 0.3938 | 0.4031 | 0.4123 | 0.4214 | 0.4305 | 0.4395 | 0.4483 | 0.4568 | 0.4665 | 0.4767 | 0.4858 | 0.4944 | 0.5027 | 0.5110 | 0.5188 | 0.5259 | 0.5331 | 0.5398 |
| Caribbean                   | 0.4293 | 0.4336 | 0.4458 | 0.4600 | 0.4739 | 0.4846 | 0.4940 | 0.5052 | 0.5151 | 0.5240 | 0.5323 | 0.5382 | 0.5435 | 0.5509 | 0.5566 | 0.5627 | 0.5688 | 0.5727 | 0.5779 | 0.5830 |
| Antigua and Barbuda         | 0.5185 | 0.5318 | 0.5447 | 0.5567 | 0.5670 | 0.5747 | 0.5807 | 0.5874 | 0.5944 | 0.6028 | 0.6111 | 0.6189 | 0.6266 | 0.6336 | 0.6399 | 0.6468 | 0.6544 | 0.6622 | 0.6701 | 0.6776 |
| The Bahamas                 | 0.5870 | 0.5976 | 0.6072 | 0.6159 | 0.6211 | 0.6243 | 0.6278 | 0.6328 | 0.6399 | 0.6501 | 0.6591 | 0.6663 | 0.6735 | 0.6810 | 0.6892 | 0.6972 | 0.7042 | 0.7094 | 0.7133 | 0.7165 |

**Appendix Table 5A. SDI Values by location, 1970-1989**

| Location                         | 1970   | 1971   | 1972   | 1973   | 1974   | 1975   | 1976   | 1977   | 1978   | 1979   | 1980   | 1981   | 1982   | 1983   | 1984   | 1985   | 1986   | 1987   | 1988   | 1989   |
|----------------------------------|--------|--------|--------|--------|--------|--------|--------|--------|--------|--------|--------|--------|--------|--------|--------|--------|--------|--------|--------|--------|
| Barbados                         | 0.5739 | 0.5862 | 0.5978 | 0.6090 | 0.6191 | 0.6286 | 0.6361 | 0.6431 | 0.6494 | 0.6557 | 0.6618 | 0.6675 | 0.6728 | 0.6785 | 0.6849 | 0.6914 | 0.6986 | 0.7058 | 0.7128 | 0.7199 |
| Belize                           | 0.2780 | 0.2872 | 0.2951 | 0.3025 | 0.3110 | 0.3180 | 0.3235 | 0.3290 | 0.3337 | 0.3386 | 0.3437 | 0.3480 | 0.3531 | 0.3601 | 0.3689 | 0.3791 | 0.3907 | 0.4042 | 0.4187 | 0.4348 |
| Cuba                             | 0.4887 | 0.4886 | 0.5075 | 0.5302 | 0.5518 | 0.5664 | 0.5791 | 0.5969 | 0.6111 | 0.6219 | 0.6308 | 0.6341 | 0.6365 | 0.6451 | 0.6501 | 0.6578 | 0.6664 | 0.6683 | 0.6734 | 0.6788 |
| Dominica                         | 0.3727 | 0.3919 | 0.4138 | 0.4391 | 0.4650 | 0.4870 | 0.5032 | 0.5149 | 0.5239 | 0.5267 | 0.5290 | 0.5341 | 0.5408 | 0.5484 | 0.5560 | 0.5630 | 0.5704 | 0.5775 | 0.5844 | 0.5901 |
| Dominican Republic               | 0.3311 | 0.3354 | 0.3427 | 0.3536 | 0.3665 | 0.3794 | 0.3912 | 0.4020 | 0.4120 | 0.4227 | 0.4351 | 0.4485 | 0.4626 | 0.4770 | 0.4896 | 0.4991 | 0.5065 | 0.5131 | 0.5189 | 0.5237 |
| Grenada                          | 0.3539 | 0.3629 | 0.3723 | 0.3820 | 0.3916 | 0.4011 | 0.4106 | 0.4194 | 0.4278 | 0.4355 | 0.4418 | 0.4478 | 0.4533 | 0.4583 | 0.4631 | 0.4683 | 0.4730 | 0.4790 | 0.4853 | 0.4924 |
| Guyana                           | 0.4284 | 0.4359 | 0.4424 | 0.4487 | 0.4555 | 0.4630 | 0.4697 | 0.4757 | 0.4817 | 0.4883 | 0.4959 | 0.5032 | 0.5088 | 0.5136 | 0.5165 | 0.5178 | 0.5187 | 0.5193 | 0.5189 | 0.5180 |
| Haiti                            | 0.2107 | 0.2144 | 0.2183 | 0.2228 | 0.2276 | 0.2323 | 0.2377 | 0.2425 | 0.2471 | 0.2520 | 0.2570 | 0.2608 | 0.2640 | 0.2675 | 0.2711 | 0.2748 | 0.2787 | 0.2838 | 0.2904 | 0.2968 |
| Jamaica                          | 0.4298 | 0.4435 | 0.4602 | 0.4772 | 0.4935 | 0.5088 | 0.5219 | 0.5334 | 0.5432 | 0.5508 | 0.5568 | 0.5626 | 0.5681 | 0.5734 | 0.5776 | 0.5801 | 0.5832 | 0.5870 | 0.5905 | 0.5945 |
| Saint Lucia                      | 0.2506 | 0.2750 | 0.2984 | 0.3209 | 0.3420 | 0.3621 | 0.3833 | 0.4037 | 0.4231 | 0.4398 | 0.4529 | 0.4635 | 0.4730 | 0.4825 | 0.4924 | 0.5024 | 0.5128 | 0.5230 | 0.5339 | 0.5445 |
| Saint Vincent and the Grenadines | 0.2981 | 0.3095 | 0.3255 | 0.3402 | 0.3527 | 0.3637 | 0.3758 | 0.3867 | 0.3976 | 0.4077 | 0.4175 | 0.4277 | 0.4382 | 0.4490 | 0.4601 | 0.4708 | 0.4803 | 0.4890 | 0.4988 | 0.5076 |
| Suriname                         | 0.4009 | 0.4125 | 0.4259 | 0.4392 | 0.4512 | 0.4630 | 0.4740 | 0.4853 | 0.4958 | 0.5039 | 0.5100 | 0.5152 | 0.5195 | 0.5236 | 0.5283 | 0.5346 | 0.5407 | 0.5463 | 0.5532 | 0.5603 |
| Trinidad and Tobago              | 0.5176 | 0.5249 | 0.5333 | 0.5436 | 0.5555 | 0.5660 | 0.5753 | 0.5819 | 0.5860 | 0.5891 | 0.5922 | 0.5954 | 0.5993 | 0.6032 | 0.6082 | 0.6153 | 0.6240 | 0.6334 | 0.6419 | 0.6488 |
| Bermuda                          | 0.5775 | 0.5861 | 0.6024 | 0.6182 | 0.6302 | 0.6400 | 0.6502 | 0.6603 | 0.6681 | 0.6742 | 0.6805 | 0.6868 | 0.6925 | 0.6978 | 0.7026 | 0.7075 | 0.7131 | 0.7186 | 0.7239 | 0.7288 |
| Puerto Rico                      | 0.6130 | 0.6237 | 0.6354 | 0.6467 | 0.6554 | 0.6611 | 0.6649 | 0.6701 | 0.6781 | 0.6884 | 0.6991 | 0.7098 | 0.7190 | 0.7268 | 0.7335 | 0.7386 | 0.7434 | 0.7481 | 0.7534 | 0.7596 |
| Virgin Islands, U.S.             | 0.5975 | 0.6092 | 0.6208 | 0.6326 | 0.6446 | 0.6572 | 0.6706 | 0.6843 | 0.6981 | 0.7114 | 0.7232 | 0.7320 | 0.7376 | 0.7429 | 0.7493 | 0.7554 | 0.7601 | 0.7637 | 0.7673 | 0.7715 |
| Andean Latin America             | 0.3793 | 0.3858 | 0.3922 | 0.3987 | 0.4057 | 0.4128 | 0.4200 | 0.4273 | 0.4346 | 0.4420 | 0.4496 | 0.4574 | 0.4654 | 0.4729 | 0.4806 | 0.4881 | 0.4959 | 0.5037 | 0.5113 | 0.5178 |
| Bolivia                          | 0.2904 | 0.2960 | 0.3018 | 0.3076 | 0.3137 | 0.3199 | 0.3262 | 0.3329 | 0.3396 | 0.3466 | 0.3537 | 0.3610 | 0.3684 | 0.3756 | 0.3829 | 0.3904 | 0.3975 | 0.4046 | 0.4115 | 0.4183 |
| Ecuador                          | 0.3768 | 0.3832 | 0.3895 | 0.3963 | 0.4037 | 0.4110 | 0.4185 | 0.4263 | 0.4341 | 0.4420 | 0.4501 | 0.4583 | 0.4667 | 0.4752 | 0.4839 | 0.4927 | 0.5015 | 0.5091 | 0.5163 | 0.5232 |
| Peru                             | 0.4087 | 0.4152 | 0.4217 | 0.4282 | 0.4351 | 0.4422 | 0.4494 | 0.4565 | 0.4635 | 0.4706 | 0.4778 | 0.4853 | 0.4929 | 0.4998 | 0.5068 | 0.5137 | 0.5209 | 0.5289 | 0.5366 | 0.5426 |
| Central Latin America            | 0.3732 | 0.3818 | 0.3913 | 0.4001 | 0.4084 | 0.4174 | 0.4267 | 0.4358 | 0.4452 | 0.4554 | 0.4658 | 0.4758 | 0.4849 | 0.4935 | 0.5021 | 0.5102 | 0.5175 | 0.5246 | 0.5315 | 0.5374 |
| Colombia                         | 0.3931 | 0.4016 | 0.4109 | 0.4206 | 0.4303 | 0.4398 | 0.4491 | 0.4583 | 0.4675 | 0.4764 | 0.4849 | 0.4927 | 0.4998 | 0.5063 | 0.5126 | 0.5190 | 0.5256 | 0.5319 | 0.5382 | 0.5443 |
| Costa Rica                       | 0.4440 | 0.4586 | 0.4718 | 0.4830 | 0.4913 | 0.4975 | 0.5028 | 0.5082 | 0.5138 | 0.5201 | 0.5266 | 0.5319 | 0.5352 | 0.5370 | 0.5387 | 0.5414 | 0.5464 | 0.5519 | 0.5573 | 0.5634 |
| El Salvador                      | 0.3037 | 0.3093 | 0.3150 | 0.3208 | 0.3267 | 0.3331 | 0.3407 | 0.3501 | 0.3609 | 0.3721 | 0.3826 | 0.3922 | 0.4007 | 0.4082 | 0.4142 | 0.4192 | 0.4239 | 0.4286 | 0.4336 | 0.4388 |
| Guatemala                        | 0.2594 | 0.2659 | 0.2726 | 0.2794 | 0.2861 | 0.2925 | 0.2991 | 0.3060 | 0.3127 | 0.3191 | 0.3252 | 0.3305 | 0.3347 | 0.3384 | 0.3418 | 0.3450 | 0.3482 | 0.3515 | 0.3554 | 0.3598 |
| Honduras                         | 0.1962 | 0.2029 | 0.2113 | 0.2203 | 0.2290 | 0.2382 | 0.2489 | 0.2607 | 0.2727 | 0.2841 | 0.2946 | 0.3043 | 0.3131 | 0.3213 | 0.3294 | 0.3372 | 0.3448 | 0.3530 | 0.3621 | 0.3716 |
| Mexico                           | 0.3569 | 0.3656 | 0.3749 | 0.3845 | 0.3942 | 0.4040 | 0.4138 | 0.4236 | 0.4342 | 0.4456 | 0.4576 | 0.4697 | 0.4808 | 0.4910 | 0.5012 | 0.5112 | 0.5205 | 0.5296 | 0.5382 | 0.5467 |
| Nicaragua                        | 0.3517 | 0.3581 | 0.3643 | 0.3710 | 0.3782 | 0.3847 | 0.3921 | 0.3997 | 0.4046 | 0.4065 | 0.4092 | 0.4121 | 0.4147 | 0.4178 | 0.4208 | 0.4239 | 0.4269 | 0.4300 | 0.4313 | 0.4327 |
| Panama                           | 0.4375 | 0.4499 | 0.4633 | 0.4764 | 0.4879 | 0.4980 | 0.5072 | 0.5156 | 0.5243 | 0.5329 | 0.5421 | 0.5516 | 0.5605 | 0.5677 | 0.5742 | 0.5809 | 0.5877 | 0.5936 | 0.5971 | 0.6000 |
| Venezuela                        | 0.4524 | 0.4616 | 0.4746 | 0.4794 | 0.4805 | 0.4883 | 0.4977 | 0.5046 | 0.5113 | 0.5219 | 0.5328 | 0.5402 | 0.5471 | 0.5571 | 0.5684 | 0.5774 | 0.5827 | 0.5877 | 0.5936 | 0.5917 |
| Aguascalientes                   | 0.3860 | 0.3953 | 0.4050 | 0.4151 | 0.4253 | 0.4355 | 0.4456 | 0.4557 | 0.4664 | 0.4778 | 0.4898 | 0.5016 | 0.5121 | 0.5212 | 0.5298 | 0.5384 | 0.5483 | 0.5582 | 0.5670 | 0.5764 |
| Baja California                  | 0.4303 | 0.4388 | 0.4476 | 0.4566 | 0.4656 | 0.4744 | 0.4831 | 0.4918 | 0.5013 | 0.5118 | 0.5234 | 0.5359 | 0.5479 | 0.5597 | 0.5722 | 0.5853 | 0.5974 | 0.6079 | 0.6167 | 0.6238 |
| Baja California Sur              | 0.4474 | 0.4554 | 0.4637 | 0.4721 | 0.4804 | 0.4886 | 0.4969 | 0.5051 | 0.5141 | 0.5241 | 0.5353 | 0.5473 | 0.5591 | 0.5711 | 0.5836 | 0.5960 | 0.6050 | 0.6152 | 0.6271 | 0.6353 |
| Campeche                         | 0.3358 | 0.3446 | 0.3539 | 0.3636 | 0.3735 | 0.3834 | 0.3933 | 0.4032 | 0.4139 | 0.4253 | 0.4372 | 0.4491 | 0.4594 | 0.4683 | 0.4767 | 0.4849 | 0.4938 | 0.5028 | 0.5110 | 0.5203 |
| Coahuila                         | 0.3845 | 0.3948 | 0.4057 | 0.4170 | 0.4282 | 0.4395 | 0.4506 | 0.4618 | 0.4736 | 0.4860 | 0.4989 | 0.5117 | 0.5230 | 0.5332 | 0.5429 | 0.5522 | 0.5621 | 0.5723 | 0.5822 | 0.5933 |
| Colima                           | 0.3620 | 0.3719 | 0.3823 | 0.3930 | 0.4038 | 0.4145 | 0.4252 | 0.4360 | 0.4474 | 0.4594 | 0.4720 | 0.4845 | 0.4959 | 0.5065 | 0.5169 | 0.5277 | 0.5400 | 0.5527 | 0.5652 | 0.5785 |
| Chiapas                          | 0.1858 | 0.1950 | 0.2049 | 0.2153 | 0.2263 | 0.2374 | 0.2488 | 0.2604 | 0.2729 | 0.2860 | 0.2995 | 0.3125 | 0.3234 | 0.3317 | 0.3383 | 0.3425 | 0.3449 | 0.3453 | 0.3422 | 0.3393 |
| Chihuahua                        | 0.3823 | 0.3921 | 0.4023 | 0.4128 | 0.4234 | 0.4340 | 0.4445 | 0.4550 | 0.4662 | 0.4780 | 0.4903 | 0.5026 | 0.5133 | 0.5226 | 0.5314 | 0.5400 | 0.5491 | 0.5586 | 0.5677 | 0.5776 |
| Distrito Federal                 | 0.4739 | 0.4845 | 0.4957 | 0.5073 | 0.5190 | 0.5307 | 0.5423 | 0.5539 | 0.5661 | 0.5788 | 0.5920 | 0.6047 | 0.6154 | 0.6238 | 0.6306 | 0.6353 | 0.6383 | 0.6421 | 0.6489 | 0.6597 |
| Durango                          | 0.3593 | 0.3679 | 0.3770 | 0.3866 | 0.3962 | 0.4060 | 0.4157 | 0.4256 | 0.4360 | 0.4472 | 0.4588 | 0.4704 | 0.4801 | 0.4881 | 0.4951 | 0.5018 | 0.5091 | 0.5163 | 0.5222 | 0.5288 |
| Guanajuato                       | 0.2796 | 0.2887 | 0.2982 | 0.3081 | 0.3182 | 0.3284 | 0.3386 | 0.3489 | 0.3599 | 0.3717 | 0.3840 | 0.3963 | 0.4073 | 0.4174 | 0.4272 | 0.4370 | 0.4484 | 0.4607 | 0.4723 | 0.4846 |
| Guerrero                         | 0.2548 | 0.2630 | 0.2720 | 0.2813 | 0.2910 | 0.3007 | 0.3106 | 0.3206 | 0.3315 | 0.3431 | 0.3552 | 0.3672 | 0.3776 | 0.3866 | 0.3950 | 0.4036 | 0.4131 | 0.4233 | 0.4312 | 0.4371 |
| Hidalgo                          | 0.2839 | 0.2923 | 0.3012 | 0.3106 | 0.3201 | 0.3297 | 0.3394 | 0.3492 | 0.3598 | 0.3712 | 0.3832 | 0.3954 | 0.4064 | 0.4164 | 0.4263 | 0.4368 | 0.4487 | 0.4603 | 0.4701 | 0.4803 |
| Jalisco                          | 0.3575 | 0.3668 | 0.3767 | 0.3869 | 0.3972 | 0.4075 | 0.4178 | 0.4281 | 0.4391 | 0.4508 | 0.4630 | 0.4752 | 0.4861 | 0.4959 | 0.5052 | 0.5144 | 0.5245 | 0.5347 | 0.5439 | 0.5540 |
| Mexico                           | 0.3723 | 0.3791 | 0.3861 | 0.3929 | 0.3994 | 0.4057 | 0.4118 | 0.4182 | 0.4257 | 0.4352 | 0.4475 | 0.4628 | 0.4808 | 0.5024 | 0.5279 | 0.5539 | 0.5707 | 0.5820 | 0.5918 | 0.5952 |
| Michoacan de Ocampo              | 0.2650 | 0.2739 | 0.2832 | 0.2930 | 0.3029 | 0.3129 | 0.3229 | 0.3331 | 0.3440 | 0.3555 | 0.3677 | 0.3799 | 0.3907 | 0.4005 | 0.4100 | 0.4196 | 0.4311 | 0.4430 | 0.4533 | 0.4642 |
| Morelos                          | 0.3691 | 0.3789 | 0.3893 | 0.4001 | 0.4109 | 0.4217 | 0.4325 | 0.4434 | 0.4548 | 0.4669 | 0.4794 | 0.4919 | 0.5031 | 0.5133 | 0.5230 | 0.5327 | 0.5432 | 0.5538 | 0.5641 | 0.5756 |
| Nayarit                          | 0.3101 | 0.3204 | 0.3312 | 0.3424 | 0.3539 | 0.3655 | 0.3772 | 0.3890 | 0.4015 | 0.4147 | 0.4284 | 0.4420 | 0.4538 | 0.4638 | 0.4731 | 0.4817 | 0.4910 | 0.5011 | 0.5110 | 0.5221 |
| Nuevo Leon                       | 0.4770 | 0.4867 | 0.4968 | 0.5071 | 0.5175 | 0.5279 | 0.5382 | 0.5485 | 0.5593 | 0.5706 | 0.5822 | 0.5936 | 0.6035 | 0.6117 | 0.6192 | 0.6256 | 0.6318 | 0.6380 | 0.6443 | 0.6517 |

| Appendix Table 5A. SDI Values by location, 1970-1989 |        |        |        |        |        |        |        |        |        |        |        |        |        |        |        |        |        |        |        |        |  |
|------------------------------------------------------|--------|--------|--------|--------|--------|--------|--------|--------|--------|--------|--------|--------|--------|--------|--------|--------|--------|--------|--------|--------|--|
| Location                                             | 1970   | 1971   | 1972   | 1973   | 1974   | 1975   | 1976   | 1977   | 1978   | 1979   | 1980   | 1981   | 1982   | 1983   | 1984   | 1985   | 1986   | 1987   | 1988   | 1989   |  |
| Oaxaca                                               | 0.2667 | 0.2738 | 0.2814 | 0.2894 | 0.2975 | 0.3057 | 0.3139 | 0.3222 | 0.3312 | 0.3409 | 0.3512 | 0.3618 | 0.3712 | 0.3796 | 0.3877 | 0.3963 | 0.4063 | 0.4169 | 0.4265 | 0.4365 |  |
| Puebla                                               | 0.3050 | 0.3136 | 0.3226 | 0.3320 | 0.3416 | 0.3513 | 0.3610 | 0.3707 | 0.3812 | 0.3923 | 0.4041 | 0.4158 | 0.4264 | 0.4358 | 0.4449 | 0.4541 | 0.4646 | 0.4752 | 0.4847 | 0.4945 |  |
| Queretaro                                            | 0.3045 | 0.3171 | 0.3306 | 0.3446 | 0.3591 | 0.3737 | 0.3884 | 0.4028 | 0.4174 | 0.4317 | 0.4451 | 0.4564 | 0.4632 | 0.4647 | 0.4607 | 0.4527 | 0.4520 | 0.4698 | 0.4947 | 0.5148 |  |
| Quintana Roo                                         | 0.3765 | 0.3864 | 0.3969 | 0.4078 | 0.4188 | 0.4300 | 0.4412 | 0.4525 | 0.4645 | 0.4772 | 0.4903 | 0.5031 | 0.5143 | 0.5237 | 0.5322 | 0.5397 | 0.5467 | 0.5533 | 0.5594 | 0.5669 |  |
| San Luis Potosi                                      | 0.2525 | 0.2631 | 0.2743 | 0.2860 | 0.2979 | 0.3099 | 0.3219 | 0.3341 | 0.3471 | 0.3609 | 0.3753 | 0.3897 | 0.4026 | 0.4141 | 0.4251 | 0.4362 | 0.4485 | 0.4618 | 0.4743 | 0.4873 |  |
| Sinaloa                                              | 0.3853 | 0.3944 | 0.4040 | 0.4141 | 0.4244 | 0.4348 | 0.4452 | 0.4557 | 0.4669 | 0.4788 | 0.4912 | 0.5034 | 0.5140 | 0.5231 | 0.5314 | 0.5393 | 0.5475 | 0.5561 | 0.5642 | 0.5726 |  |
| Sonora                                               | 0.4175 | 0.4274 | 0.4379 | 0.4486 | 0.4595 | 0.4704 | 0.4813 | 0.4922 | 0.5037 | 0.5158 | 0.5283 | 0.5408 | 0.5515 | 0.5606 | 0.5689 | 0.5766 | 0.5844 | 0.5917 | 0.5983 | 0.6059 |  |
| Tabasco                                              | 0.3153 | 0.3240 | 0.3334 | 0.3431 | 0.3531 | 0.3633 | 0.3737 | 0.3842 | 0.3954 | 0.4074 | 0.4198 | 0.4320 | 0.4427 | 0.4520 | 0.4607 | 0.4689 | 0.4780 | 0.4875 | 0.4963 | 0.5058 |  |
| Tamaulipas                                           | 0.4030 | 0.4122 | 0.4218 | 0.4317 | 0.4417 | 0.4515 | 0.4613 | 0.4712 | 0.4816 | 0.4927 | 0.5042 | 0.5158 | 0.5260 | 0.5352 | 0.5440 | 0.5526 | 0.5621 | 0.5721 | 0.5822 | 0.5933 |  |
| Tlaxcala                                             | 0.2698 | 0.2784 | 0.2871 | 0.2959 | 0.3045 | 0.3130 | 0.3213 | 0.3293 | 0.3381 | 0.3479 | 0.3591 | 0.3715 | 0.3839 | 0.3974 | 0.4132 | 0.4324 | 0.4549 | 0.4789 | 0.4992 | 0.5135 |  |
| Veracruz de Ignacio de la Llave                      | 0.3069 | 0.3155 | 0.3247 | 0.3342 | 0.3439 | 0.3538 | 0.3637 | 0.3737 | 0.3845 | 0.3960 | 0.4080 | 0.4200 | 0.4306 | 0.4400 | 0.4490 | 0.4579 | 0.4673 | 0.4765 | 0.4845 | 0.4927 |  |
| Yucatan                                              | 0.3786 | 0.3862 | 0.3943 | 0.4027 | 0.4112 | 0.4198 | 0.4283 | 0.4369 | 0.4460 | 0.4558 | 0.4662 | 0.4766 | 0.4857 | 0.4935 | 0.5007 | 0.5075 | 0.5148 | 0.5219 | 0.5284 | 0.5361 |  |
| Zacatecas                                            | 0.2732 | 0.2826 | 0.2924 | 0.3026 | 0.3131 | 0.3236 | 0.3341 | 0.3447 | 0.3560 | 0.3680 | 0.3807 | 0.3934 | 0.4048 | 0.4150 | 0.4249 | 0.4347 | 0.4460 | 0.4586 | 0.4710 | 0.4845 |  |
| Tropical Latin America                               | 0.3594 | 0.3677 | 0.3766 | 0.3863 | 0.3958 | 0.4051 | 0.4145 | 0.4234 | 0.4318 | 0.4391 | 0.4490 | 0.4607 | 0.4708 | 0.4800 | 0.4890 | 0.4983 | 0.5071 | 0.5154 | 0.5236 | 0.5316 |  |
| Brazil                                               | 0.3591 | 0.3674 | 0.3764 | 0.3860 | 0.3956 | 0.4049 | 0.4143 | 0.4232 | 0.4316 | 0.4390 | 0.4489 | 0.4607 | 0.4710 | 0.4803 | 0.4895 | 0.4989 | 0.5079 | 0.5163 | 0.5246 | 0.5327 |  |
| Paraguay                                             | 0.3577 | 0.3650 | 0.3725 | 0.3804 | 0.3884 | 0.3964 | 0.4047 | 0.4136 | 0.4225 | 0.4302 | 0.4371 | 0.4436 | 0.4480 | 0.4509 | 0.4536 | 0.4562 | 0.4586 | 0.4613 | 0.4647 | 0.4685 |  |
| Acre                                                 | 0.2521 | 0.2591 | 0.2668 | 0.2751 | 0.2834 | 0.2915 | 0.3000 | 0.3080 | 0.3157 | 0.3220 | 0.3321 | 0.3457 | 0.3577 | 0.3689 | 0.3802 | 0.3918 | 0.4040 | 0.4161 | 0.4277 | 0.4388 |  |
| Alagoas                                              | 0.2355 | 0.2425 | 0.2503 | 0.2588 | 0.2673 | 0.2755 | 0.2838 | 0.2916 | 0.2991 | 0.3057 | 0.3142 | 0.3245 | 0.3336 | 0.3418 | 0.3500 | 0.3580 | 0.3676 | 0.3780 | 0.3877 | 0.3971 |  |
| Amazonas                                             | 0.2801 | 0.2882 | 0.2969 | 0.3063 | 0.3155 | 0.3244 | 0.3334 | 0.3419 | 0.3499 | 0.3564 | 0.3670 | 0.3815 | 0.3939 | 0.4053 | 0.4164 | 0.4271 | 0.4389 | 0.4517 | 0.4638 | 0.4755 |  |
| Amapa                                                | 0.2510 | 0.2600 | 0.2696 | 0.2798 | 0.2899 | 0.2998 | 0.3102 | 0.3202 | 0.3299 | 0.3397 | 0.3518 | 0.3660 | 0.3796 | 0.3926 | 0.4055 | 0.4186 | 0.4320 | 0.4448 | 0.4567 | 0.4678 |  |
| Bahia                                                | 0.2737 | 0.2811 | 0.2892 | 0.2980 | 0.3068 | 0.3154 | 0.3239 | 0.3320 | 0.3399 | 0.3472 | 0.3556 | 0.3649 | 0.3734 | 0.3812 | 0.3891 | 0.3968 | 0.4065 | 0.4174 | 0.4276 | 0.4375 |  |
| Ceara                                                | 0.2632 | 0.2708 | 0.2791 | 0.2882 | 0.2973 | 0.3062 | 0.3147 | 0.3228 | 0.3306 | 0.3382 | 0.3462 | 0.3546 | 0.3623 | 0.3692 | 0.3762 | 0.3822 | 0.3924 | 0.4057 | 0.4174 | 0.4285 |  |
| Distrito Federal                                     | 0.4987 | 0.5077 | 0.5174 | 0.5276 | 0.5376 | 0.5472 | 0.5580 | 0.5682 | 0.5778 | 0.5866 | 0.5969 | 0.6075 | 0.6168 | 0.6254 | 0.6340 | 0.6433 | 0.6520 | 0.6591 | 0.6664 | 0.6735 |  |
| Espirito Santo                                       | 0.3652 | 0.3738 | 0.3830 | 0.3930 | 0.4028 | 0.4125 | 0.4224 | 0.4318 | 0.4409 | 0.4490 | 0.4589 | 0.4703 | 0.4805 | 0.4898 | 0.4991 | 0.5086 | 0.5181 | 0.5273 | 0.5362 | 0.5448 |  |
| Goiias                                               | 0.2988 | 0.3077 | 0.3174 | 0.3277 | 0.3380 | 0.3481 | 0.3582 | 0.3678 | 0.3767 | 0.3839 | 0.3955 | 0.4115 | 0.4250 | 0.4374 | 0.4496 | 0.4619 | 0.4730 | 0.4827 | 0.4925 | 0.5021 |  |
| Maranhao                                             | 0.2326 | 0.2391 | 0.2464 | 0.2543 | 0.2623 | 0.2702 | 0.2783 | 0.2862 | 0.2939 | 0.3019 | 0.3087 | 0.3140 | 0.3191 | 0.3237 | 0.3285 | 0.3332 | 0.3414 | 0.3520 | 0.3615 | 0.3707 |  |
| Minas Gerais                                         | 0.3632 | 0.3713 | 0.3800 | 0.3895 | 0.3988 | 0.4079 | 0.4170 | 0.4256 | 0.4337 | 0.4406 | 0.4503 | 0.4625 | 0.4731 | 0.4829 | 0.4926 | 0.5029 | 0.5115 | 0.5182 | 0.5253 | 0.5323 |  |
| Mato Grosso do Sul                                   | 0.3098 | 0.3182 | 0.3273 | 0.3370 | 0.3467 | 0.3561 | 0.3657 | 0.3748 | 0.3833 | 0.3898 | 0.4014 | 0.4178 | 0.4318 | 0.4446 | 0.4572 | 0.4706 | 0.4812 | 0.4889 | 0.4975 | 0.5061 |  |
| Mato Grosso                                          | 0.3274 | 0.3356 | 0.3446 | 0.3542 | 0.3638 | 0.3732 | 0.3828 | 0.3920 | 0.4007 | 0.4082 | 0.4189 | 0.4326 | 0.4448 | 0.4561 | 0.4675 | 0.4796 | 0.4898 | 0.4980 | 0.5068 | 0.5155 |  |
| Para                                                 | 0.2846 | 0.2919 | 0.2999 | 0.3086 | 0.3172 | 0.3254 | 0.3338 | 0.3417 | 0.3491 | 0.3553 | 0.3642 | 0.3752 | 0.3847 | 0.3933 | 0.4019 | 0.4109 | 0.4196 | 0.4277 | 0.4357 | 0.4436 |  |
| Paraiba                                              | 0.2412 | 0.2490 | 0.2576 | 0.2668 | 0.2760 | 0.2850 | 0.2937 | 0.3018 | 0.3095 | 0.3160 | 0.3252 | 0.3370 | 0.3471 | 0.3561 | 0.3648 | 0.3721 | 0.3838 | 0.3989 | 0.4120 | 0.4243 |  |
| Parana                                               | 0.3488 | 0.3574 | 0.3668 | 0.3768 | 0.3868 | 0.3966 | 0.4064 | 0.4158 | 0.4247 | 0.4319 | 0.4431 | 0.4581 | 0.4709 | 0.4827 | 0.4944 | 0.5067 | 0.5168 | 0.5244 | 0.5326 | 0.5408 |  |
| Pernambuco                                           | 0.2766 | 0.2848 | 0.2938 | 0.3033 | 0.3128 | 0.3221 | 0.3312 | 0.3398 | 0.3479 | 0.3547 | 0.3644 | 0.3765 | 0.3869 | 0.3961 | 0.4052 | 0.4137 | 0.4245 | 0.4367 | 0.4477 | 0.4582 |  |
| Piaui                                                | 0.2432 | 0.2500 | 0.2575 | 0.2658 | 0.2740 | 0.2822 | 0.2903 | 0.2981 | 0.3056 | 0.3127 | 0.3206 | 0.3291 | 0.3368 | 0.3438 | 0.3509 | 0.3577 | 0.3670 | 0.3781 | 0.3882 | 0.3981 |  |
| Rio de Janeiro                                       | 0.4394 | 0.4481 | 0.4576 | 0.4676 | 0.4774 | 0.4868 | 0.4965 | 0.5055 | 0.5137 | 0.5201 | 0.5308 | 0.5449 | 0.5566 | 0.5669 | 0.5768 | 0.5870 | 0.5954 | 0.6018 | 0.6084 | 0.6148 |  |
| Rio Grande do Norte                                  | 0.2679 | 0.2761 | 0.2852 | 0.2949 | 0.3046 | 0.3142 | 0.3233 | 0.3319 | 0.3401 | 0.3472 | 0.3568 | 0.3693 | 0.3802 | 0.3901 | 0.3998 | 0.4094 | 0.4200 | 0.4311 | 0.4416 | 0.4516 |  |
| Rondonia                                             | 0.2719 | 0.2797 | 0.2883 | 0.2975 | 0.3066 | 0.3155 | 0.3246 | 0.3332 | 0.3413 | 0.3476 | 0.3583 | 0.3734 | 0.3863 | 0.3982 | 0.4100 | 0.4219 | 0.4341 | 0.4458 | 0.4570 | 0.4675 |  |
| Roraima                                              | 0.3131 | 0.3209 | 0.3294 | 0.3386 | 0.3478 | 0.3567 | 0.3658 | 0.3746 | 0.3832 | 0.3919 | 0.4012 | 0.4113 | 0.4210 | 0.4304 | 0.4401 | 0.4504 | 0.4614 | 0.4723 | 0.4829 | 0.4932 |  |
| Rio Grande do Sul                                    | 0.4194 | 0.4275 | 0.4363 | 0.4457 | 0.4550 | 0.4639 | 0.4731 | 0.4817 | 0.4898 | 0.4969 | 0.5058 | 0.5162 | 0.5251 | 0.5332 | 0.5412 | 0.5495 | 0.5574 | 0.5648 | 0.5720 | 0.5790 |  |
| Santa Catarina                                       | 0.3878 | 0.3961 | 0.4052 | 0.4149 | 0.4245 | 0.4337 | 0.4431 | 0.4520 | 0.4603 | 0.4676 | 0.4773 | 0.4890 | 0.4990 | 0.5082 | 0.5172 | 0.5264 | 0.5356 | 0.5445 | 0.5531 | 0.5614 |  |
| Sergipe                                              | 0.2485 | 0.2566 | 0.2654 | 0.2749 | 0.2843 | 0.2936 | 0.3027 | 0.3114 | 0.3195 | 0.3263 | 0.3364 | 0.3500 | 0.3614 | 0.3717 | 0.3817 | 0.3906 | 0.4027 | 0.4171 | 0.4299 | 0.4419 |  |
| Sao Paulo                                            | 0.4389 | 0.4472 | 0.4562 | 0.4658 | 0.4753 | 0.4845 | 0.4942 | 0.5033 | 0.5120 | 0.5194 | 0.5295 | 0.5415 | 0.5519 | 0.5613 | 0.5707 | 0.5807 | 0.5891 | 0.5956 | 0.6024 | 0.6092 |  |
| Tocantins                                            | 0.2840 | 0.2924 | 0.3016 | 0.3117 | 0.3217 | 0.3316 | 0.3416 | 0.3513 | 0.3608 | 0.3701 | 0.3797 | 0.3891 | 0.3981 | 0.4064 | 0.4150 | 0.4239 | 0.4335 | 0.4430 | 0.4521 | 0.4609 |  |
| North Africa and Middle East                         | 0.2863 | 0.2948 | 0.3040 | 0.3136 | 0.3238 | 0.3336 | 0.3434 | 0.3531 | 0.3625 | 0.3722 | 0.3821 | 0.3918 | 0.4009 | 0.4097 | 0.4185 | 0.4272 | 0.4362 | 0.4455 | 0.4550 | 0.4648 |  |
| North Africa and Middle East                         | 0.2863 | 0.2948 | 0.3040 | 0.3136 | 0.3238 | 0.3336 | 0.3434 | 0.3531 | 0.3625 | 0.3722 | 0.3821 | 0.3918 | 0.4009 | 0.4097 | 0.4185 | 0.4272 | 0.4362 | 0.4455 | 0.4550 | 0.4648 |  |
| Algeria                                              | 0.2540 | 0.2620 | 0.2708 | 0.2799 | 0.2899 | 0.3000 | 0.3106 | 0.3214 | 0.3326 | 0.3443 | 0.3559 | 0.3674 | 0.3787 | 0.3899 | 0.4009 | 0.4120 | 0.4227 | 0.4333 | 0.4433 | 0.4532 |  |
| Bahrain                                              | 0.3458 | 0.3587 | 0.3721 | 0.3863 | 0.4013 | 0.4157 | 0.4323 | 0.4490 | 0.4654 | 0.4817 | 0.4979 | 0.5131 | 0.5264 | 0.5359 | 0.5399 | 0.5418 | 0.5496 | 0.5594 | 0.5648 | 0.5713 |  |
| Egypt                                                | 0.2531 | 0.2610 | 0.2693 | 0.2780 | 0.2869 | 0.2960 | 0.3057 | 0.3157 | 0.3260 | 0.3363 | 0.3469 | 0.3577 | 0.3686 | 0.3797 | 0.3910 | 0.4022 | 0.4134 | 0.4245 | 0.4352 | 0.4462 |  |
| Iran                                                 | 0.2593 | 0.2734 | 0.2881 | 0.3031 | 0.3182 | 0.3307 | 0.3413 | 0.3512 | 0.3604 | 0.3699 | 0.3790 | 0.3874 | 0.3954 | 0.4037 | 0.4119 | 0.4215 | 0.4335 | 0.4488 | 0.4665 | 0.4870 |  |

**Appendix Table 5A. SDI Values by location, 1970-1989**

| Location             | 1970   | 1971   | 1972   | 1973   | 1974   | 1975   | 1976   | 1977   | 1978   | 1979   | 1980   | 1981   | 1982   | 1983   | 1984   | 1985   | 1986   | 1987   | 1988   | 1989   |
|----------------------|--------|--------|--------|--------|--------|--------|--------|--------|--------|--------|--------|--------|--------|--------|--------|--------|--------|--------|--------|--------|
| Iraq                 | 0.1971 | 0.2042 | 0.2110 | 0.2190 | 0.2276 | 0.2364 | 0.2465 | 0.2570 | 0.2676 | 0.2783 | 0.2894 | 0.2995 | 0.3097 | 0.3204 | 0.3312 | 0.3413 | 0.3510 | 0.3611 | 0.3715 | 0.3809 |
| Jordan               | 0.1112 | 0.1126 | 0.1139 | 0.1152 | 0.1164 | 0.1175 | 0.1189 | 0.1435 | 0.1919 | 0.2300 | 0.2637 | 0.2940 | 0.3219 | 0.3465 | 0.3685 | 0.3890 | 0.4088 | 0.4282 | 0.4475 | 0.4660 |
| Kuwait               | 0.2660 | 0.2995 | 0.3280 | 0.3498 | 0.3660 | 0.3790 | 0.3938 | 0.4117 | 0.4297 | 0.4453 | 0.4603 | 0.4764 | 0.4940 | 0.5151 | 0.5404 | 0.5663 | 0.5898 | 0.6108 | 0.6275 | 0.6421 |
| Lebanon              | 0.3570 | 0.3725 | 0.3885 | 0.4047 | 0.4217 | 0.4385 | 0.4525 | 0.4674 | 0.4818 | 0.4962 | 0.5104 | 0.5251 | 0.5363 | 0.5475 | 0.5605 | 0.5750 | 0.5880 | 0.6019 | 0.6131 | 0.6206 |
| Libya                | 0.4954 | 0.5041 | 0.5124 | 0.5204 | 0.5279 | 0.5344 | 0.5409 | 0.5471 | 0.5528 | 0.5586 | 0.5648 | 0.5698 | 0.5747 | 0.5794 | 0.5835 | 0.5877 | 0.5914 | 0.5947 | 0.5979 | 0.6013 |
| Morocco              | 0.2128 | 0.2188 | 0.2251 | 0.2316 | 0.2386 | 0.2459 | 0.2538 | 0.2619 | 0.2700 | 0.2784 | 0.2868 | 0.2949 | 0.3034 | 0.3119 | 0.3206 | 0.3295 | 0.3391 | 0.3488 | 0.3595 | 0.3703 |
| Palestine            | 0.1709 | 0.1875 | 0.2044 | 0.2206 | 0.2374 | 0.2536 | 0.2696 | 0.2851 | 0.3002 | 0.3141 | 0.3281 | 0.3406 | 0.3512 | 0.3602 | 0.3686 | 0.3762 | 0.3837 | 0.3905 | 0.3970 | 0.4036 |
| Oman                 | 0.0846 | 0.0873 | 0.0897 | 0.0917 | 0.0938 | 0.0960 | 0.0984 | 0.1007 | 0.1028 | 0.1047 | 0.1066 | 0.1087 | 0.1108 | 0.1128 | 0.1147 | 0.1355 | 0.1561 | 0.1755 | 0.1942 | 0.2135 |
| Qatar                | 0.3437 | 0.3586 | 0.3744 | 0.3911 | 0.4085 | 0.4262 | 0.4448 | 0.4637 | 0.4825 | 0.5014 | 0.5203 | 0.5398 | 0.5583 | 0.5747 | 0.5873 | 0.5958 | 0.6007 | 0.6047 | 0.6091 | 0.6148 |
| Saudi Arabia         | 0.1333 | 0.1364 | 0.1396 | 0.1424 | 0.1468 | 0.1538 | 0.1630 | 0.1742 | 0.1863 | 0.1981 | 0.2104 | 0.2253 | 0.2423 | 0.2602 | 0.2769 | 0.2926 | 0.3077 | 0.3227 | 0.3380 | 0.3531 |
| Syria                | 0.1904 | 0.1966 | 0.2044 | 0.2124 | 0.2210 | 0.2305 | 0.2404 | 0.2501 | 0.2600 | 0.2699 | 0.2800 | 0.2904 | 0.3007 | 0.3110 | 0.3204 | 0.3297 | 0.3388 | 0.3476 | 0.3570 | 0.3661 |
| Tunisia              | 0.2528 | 0.2609 | 0.2699 | 0.2789 | 0.2884 | 0.2985 | 0.3093 | 0.3199 | 0.3306 | 0.3415 | 0.3529 | 0.3644 | 0.3760 | 0.3878 | 0.3999 | 0.4123 | 0.4248 | 0.4373 | 0.4498 | 0.4625 |
| Turkey               | 0.3908 | 0.3983 | 0.4063 | 0.4146 | 0.4232 | 0.4321 | 0.4416 | 0.4510 | 0.4605 | 0.4700 | 0.4791 | 0.4887 | 0.4981 | 0.5076 | 0.5171 | 0.5267 | 0.5365 | 0.5468 | 0.5569 | 0.5664 |
| United Arab Emirates | 0.1370 | 0.1392 | 0.1416 | 0.1440 | 0.1463 | 0.1546 | 0.2079 | 0.2481 | 0.2826 | 0.3125 | 0.3395 | 0.3647 | 0.3893 | 0.4129 | 0.4356 | 0.4581 | 0.4797 | 0.5007 | 0.5208 | 0.5394 |
| Yemen                | 0.1188 | 0.1207 | 0.1234 | 0.1274 | 0.1313 | 0.1348 | 0.1386 | 0.1424 | 0.1467 | 0.1513 | 0.1553 | 0.1592 | 0.1627 | 0.1656 | 0.1675 | 0.1679 | 0.1676 | 0.1673 | 0.1682 | 0.1702 |
| Afghanistan          | 0.1155 | 0.1174 | 0.1189 | 0.1206 | 0.1224 | 0.1241 | 0.1261 | 0.1278 | 0.1298 | 0.1318 | 0.1338 | 0.1361 | 0.1387 | 0.1416 | 0.1445 | 0.1474 | 0.1504 | 0.1526 | 0.1544 | 0.1561 |
| Sudan                | 0.1896 | 0.1937 | 0.1976 | 0.2013 | 0.2056 | 0.2106 | 0.2165 | 0.2230 | 0.2290 | 0.2344 | 0.2397 | 0.2455 | 0.2518 | 0.2578 | 0.2633 | 0.2682 | 0.2736 | 0.2792 | 0.2851 | 0.2903 |
| Ha'il                | 0.1296 | 0.1326 | 0.1356 | 0.1382 | 0.1424 | 0.1494 | 0.1587 | 0.1699 | 0.1816 | 0.1930 | 0.2051 | 0.2198 | 0.2356 | 0.2517 | 0.2674 | 0.2826 | 0.2971 | 0.3116 | 0.3263 | 0.3407 |
| Qassim               | 0.0923 | 0.0942 | 0.0960 | 0.0979 | 0.0998 | 0.1017 | 0.1038 | 0.1060 | 0.1158 | 0.1336 | 0.1504 | 0.1694 | 0.1901 | 0.2110 | 0.2312 | 0.2505 | 0.2691 | 0.2877 | 0.3061 | 0.3242 |
| Riyadh               | 0.1007 | 0.1027 | 0.1046 | 0.1066 | 0.1086 | 0.1105 | 0.1193 | 0.1368 | 0.1541 | 0.1698 | 0.1854 | 0.2033 | 0.2232 | 0.2436 | 0.2635 | 0.2828 | 0.3009 | 0.3191 | 0.3371 | 0.3533 |
| Tabuk                | 0.1127 | 0.1145 | 0.1158 | 0.1159 | 0.1179 | 0.1259 | 0.1374 | 0.1516 | 0.1664 | 0.1801 | 0.1940 | 0.2103 | 0.2288 | 0.2480 | 0.2668 | 0.2850 | 0.3009 | 0.3162 | 0.3316 | 0.3467 |
| Madinah              | 0.1196 | 0.1226 | 0.1256 | 0.1281 | 0.1323 | 0.1395 | 0.1494 | 0.1614 | 0.1742 | 0.1866 | 0.1994 | 0.2149 | 0.2324 | 0.2507 | 0.2685 | 0.2847 | 0.3002 | 0.3157 | 0.3314 | 0.3468 |
| Makkah               | 0.1486 | 0.1526 | 0.1568 | 0.1609 | 0.1664 | 0.1741 | 0.1838 | 0.1950 | 0.2067 | 0.2184 | 0.2308 | 0.2456 | 0.2614 | 0.2774 | 0.2930 | 0.3082 | 0.3227 | 0.3372 | 0.3520 | 0.3667 |
| Bahah                | 0.1471 | 0.1508 | 0.1548 | 0.1588 | 0.1639 | 0.1706 | 0.1789 | 0.1885 | 0.1984 | 0.2084 | 0.2190 | 0.2320 | 0.2458 | 0.2597 | 0.2734 | 0.2867 | 0.2994 | 0.3121 | 0.3251 | 0.3380 |
| Northern Borders     | 0.1751 | 0.1800 | 0.1853 | 0.1906 | 0.1973 | 0.2058 | 0.2160 | 0.2275 | 0.2394 | 0.2513 | 0.2638 | 0.2782 | 0.2933 | 0.3084 | 0.3232 | 0.3374 | 0.3508 | 0.3642 | 0.3780 | 0.3917 |
| Jawf                 | 0.1414 | 0.1463 | 0.1514 | 0.1559 | 0.1615 | 0.1703 | 0.1815 | 0.1946 | 0.2085 | 0.2221 | 0.2362 | 0.2529 | 0.2716 | 0.2911 | 0.3108 | 0.3301 | 0.3472 | 0.3639 | 0.3808 | 0.3976 |
| Jizan                | 0.1434 | 0.1467 | 0.1502 | 0.1536 | 0.1580 | 0.1634 | 0.1701 | 0.1777 | 0.1854 | 0.1932 | 0.2017 | 0.2121 | 0.2230 | 0.2339 | 0.2446 | 0.2549 | 0.2650 | 0.2751 | 0.2855 | 0.2957 |
| 'Asir                | 0.1062 | 0.1072 | 0.1076 | 0.1071 | 0.1083 | 0.1137 | 0.1221 | 0.1330 | 0.1445 | 0.1555 | 0.1669 | 0.1812 | 0.1971 | 0.2130 | 0.2286 | 0.2434 | 0.2579 | 0.2722 | 0.2865 | 0.3005 |
| Najran               | 0.1324 | 0.1345 | 0.1366 | 0.1383 | 0.1410 | 0.1459 | 0.1526 | 0.1609 | 0.1696 | 0.1782 | 0.1875 | 0.1990 | 0.2116 | 0.2244 | 0.2370 | 0.2490 | 0.2610 | 0.2729 | 0.2850 | 0.2969 |
| Eastern Province     | 0.1240 | 0.1276 | 0.1311 | 0.1343 | 0.1384 | 0.1463 | 0.1567 | 0.1693 | 0.1826 | 0.1955 | 0.2088 | 0.2246 | 0.2425 | 0.2612 | 0.2799 | 0.2975 | 0.3135 | 0.3295 | 0.3456 | 0.3616 |
| South Asia           | 0.2411 | 0.2458 | 0.2504 | 0.2553 | 0.2599 | 0.2648 | 0.2695 | 0.2741 | 0.2790 | 0.2836 | 0.2882 | 0.2931 | 0.2980 | 0.3032 | 0.3085 | 0.3143 | 0.3204 | 0.3269 | 0.3339 | 0.3413 |
| South Asia           | 0.2411 | 0.2458 | 0.2504 | 0.2553 | 0.2599 | 0.2648 | 0.2695 | 0.2741 | 0.2790 | 0.2836 | 0.2882 | 0.2931 | 0.2980 | 0.3032 | 0.3085 | 0.3143 | 0.3204 | 0.3269 | 0.3339 | 0.3413 |
| Bangladesh           | 0.2168 | 0.2207 | 0.2245 | 0.2277 | 0.2313 | 0.2344 | 0.2379 | 0.2415 | 0.2453 | 0.2495 | 0.2538 | 0.2584 | 0.2633 | 0.2686 | 0.2745 | 0.2807 | 0.2870 | 0.2935 | 0.3000 | 0.3071 |
| Bhutan               | 0.1881 | 0.1923 | 0.1967 | 0.2011 | 0.2061 | 0.2108 | 0.2157 | 0.2208 | 0.2260 | 0.2316 | 0.2367 | 0.2421 | 0.2474 | 0.2531 | 0.2591 | 0.2654 | 0.2715 | 0.2786 | 0.2859 | 0.2934 |
| India                | 0.2481 | 0.2530 | 0.2579 | 0.2631 | 0.2678 | 0.2731 | 0.2781 | 0.2830 | 0.2882 | 0.2929 | 0.2976 | 0.3026 | 0.3075 | 0.3127 | 0.3180 | 0.3236 | 0.3295 | 0.3356 | 0.3424 | 0.3495 |
| Nepal                | 0.1647 | 0.1671 | 0.1698 | 0.1725 | 0.1755 | 0.1785 | 0.1814 | 0.1843 | 0.1874 | 0.1910 | 0.1944 | 0.1980 | 0.2020 | 0.2056 | 0.2097 | 0.2143 | 0.2191 | 0.2240 | 0.2296 | 0.2357 |
| Pakistan             | 0.1924 | 0.1950 | 0.1976 | 0.2003 | 0.2032 | 0.2059 | 0.2088 | 0.2112 | 0.2130 | 0.2144 | 0.2159 | 0.2175 | 0.2197 | 0.2227 | 0.2270 | 0.2337 | 0.2429 | 0.2546 | 0.2681 | 0.2824 |
| Andhra Pradesh       | 0.2363 | 0.2403 | 0.2443 | 0.2485 | 0.2524 | 0.2569 | 0.2610 | 0.2650 | 0.2693 | 0.2729 | 0.2765 | 0.2809 | 0.2850 | 0.2898 | 0.2941 | 0.2987 | 0.3034 | 0.3086 | 0.3151 | 0.3219 |
| Arunachal Pradesh    | 0.2182 | 0.2228 | 0.2273 | 0.2321 | 0.2365 | 0.2413 | 0.2459 | 0.2504 | 0.2551 | 0.2594 | 0.2633 | 0.2685 | 0.2742 | 0.2798 | 0.2857 | 0.2923 | 0.2997 | 0.3068 | 0.3145 | 0.3217 |
| Assam                | 0.2396 | 0.2450 | 0.2503 | 0.2559 | 0.2610 | 0.2668 | 0.2723 | 0.2776 | 0.2831 | 0.2879 | 0.2924 | 0.2984 | 0.3044 | 0.3108 | 0.3179 | 0.3250 | 0.3321 | 0.3394 | 0.3460 | 0.3532 |
| Bihar                | 0.2106 | 0.2144 | 0.2182 | 0.2223 | 0.2261 | 0.2305 | 0.2345 | 0.2384 | 0.2427 | 0.2464 | 0.2504 | 0.2548 | 0.2596 | 0.2641 | 0.2696 | 0.2749 | 0.2812 | 0.2870 | 0.2937 | 0.2998 |
| Chhattisgarh         | 0.2172 | 0.2213 | 0.2253 | 0.2294 | 0.2332 | 0.2374 | 0.2413 | 0.2448 | 0.2486 | 0.2522 | 0.2561 | 0.2603 | 0.2644 | 0.2686 | 0.2730 | 0.2773 | 0.2821 | 0.2870 | 0.2923 | 0.2980 |
| Delhi                | 0.3806 | 0.3913 | 0.4017 | 0.4121 | 0.4218 | 0.4315 | 0.4405 | 0.4488 | 0.4570 | 0.4644 | 0.4713 | 0.4778 | 0.4844 | 0.4901 | 0.4950 | 0.5000 | 0.5053 | 0.5102 | 0.5150 | 0.5199 |
| Goa                  | 0.3059 | 0.3148 | 0.3240 | 0.3335 | 0.3425 | 0.3516 | 0.3602 | 0.3687 | 0.3775 | 0.3855 | 0.3935 | 0.4008 | 0.4088 | 0.4159 | 0.4244 | 0.4318 | 0.4400 | 0.4481 | 0.4562 | 0.4647 |
| Gujarat              | 0.2604 | 0.2663 | 0.2722 | 0.2783 | 0.2841 | 0.2904 | 0.2964 | 0.3022 | 0.3082 | 0.3138 | 0.3192 | 0.3257 | 0.3314 | 0.3384 | 0.3453 | 0.3515 | 0.3590 | 0.3649 | 0.3726 | 0.3804 |
| Haryana              | 0.2554 | 0.2612 | 0.2671 | 0.2733 | 0.2793 | 0.2858 | 0.2921 | 0.2982 | 0.3046 | 0.3108 | 0.3172 | 0.3238 | 0.3310 | 0.3381 | 0.3450 | 0.3529 | 0.3609 | 0.3685 | 0.3773 | 0.3860 |
| Himachal Pradesh     | 0.2269 | 0.2324 | 0.2381 | 0.2442 | 0.2500 | 0.2565 | 0.2626 | 0.2689 | 0.2756 | 0.2820 | 0.2885 | 0.2958 | 0.3029 | 0.3107 | 0.3178 | 0.3257 | 0.3343 | 0.3429 | 0.3530 | 0.3634 |
| Jammu and Kashmir    | 0.2184 | 0.2240 | 0.2295 | 0.2353 | 0.2408 | 0.2470 | 0.2528 | 0.2585 | 0.2645 | 0.2702 | 0.2760 | 0.2821 | 0.2884 | 0.2947 | 0.3014 | 0.3080 | 0.3156 | 0.3218 | 0.3290 | 0.3360 |
| Jharkhand            | 0.2255 | 0.2290 | 0.2324 | 0.2359 | 0.2392 | 0.2428 | 0.2461 | 0.2491 | 0.2524 | 0.2554 | 0.2588 | 0.2623 | 0.2658 | 0.2693 | 0.2730 | 0.2767 | 0.2808 | 0.2850 | 0.2897 | 0.2947 |

Appendix Table 5A. SDI Values by location, 1970-1989

| Location                           | 1970   | 1971   | 1972   | 1973   | 1974   | 1975   | 1976   | 1977   | 1978   | 1979   | 1980   | 1981   | 1982   | 1983   | 1984   | 1985   | 1986   | 1987   | 1988   | 1989   |
|------------------------------------|--------|--------|--------|--------|--------|--------|--------|--------|--------|--------|--------|--------|--------|--------|--------|--------|--------|--------|--------|--------|
| Karnataka                          | 0.2433 | 0.2484 | 0.2535 | 0.2589 | 0.2640 | 0.2696 | 0.2749 | 0.2801 | 0.2857 | 0.2906 | 0.2956 | 0.3009 | 0.3061 | 0.3119 | 0.3181 | 0.3238 | 0.3304 | 0.3372 | 0.3444 | 0.3520 |
| Kerala                             | 0.2996 | 0.3073 | 0.3148 | 0.3226 | 0.3296 | 0.3371 | 0.3440 | 0.3507 | 0.3575 | 0.3632 | 0.3690 | 0.3740 | 0.3794 | 0.3851 | 0.3910 | 0.3964 | 0.4026 | 0.4089 | 0.4152 | 0.4219 |
| Madhya Pradesh                     | 0.2270 | 0.2311 | 0.2352 | 0.2396 | 0.2437 | 0.2483 | 0.2527 | 0.2570 | 0.2617 | 0.2661 | 0.2708 | 0.2755 | 0.2804 | 0.2860 | 0.2912 | 0.2972 | 0.3028 | 0.3094 | 0.3166 | 0.3236 |
| Maharashtra                        | 0.2706 | 0.2770 | 0.2836 | 0.2905 | 0.2971 | 0.3042 | 0.3110 | 0.3178 | 0.3250 | 0.3318 | 0.3388 | 0.3460 | 0.3531 | 0.3605 | 0.3677 | 0.3752 | 0.3828 | 0.3908 | 0.3990 | 0.4083 |
| Manipur                            | 0.2147 | 0.2212 | 0.2277 | 0.2346 | 0.2411 | 0.2480 | 0.2545 | 0.2607 | 0.2675 | 0.2740 | 0.2804 | 0.2878 | 0.2949 | 0.3024 | 0.3104 | 0.3182 | 0.3263 | 0.3358 | 0.3456 | 0.3548 |
| Meghalaya                          | 0.2370 | 0.2424 | 0.2476 | 0.2531 | 0.2582 | 0.2637 | 0.2687 | 0.2735 | 0.2785 | 0.2827 | 0.2869 | 0.2914 | 0.2957 | 0.3003 | 0.3053 | 0.3104 | 0.3161 | 0.3226 | 0.3282 | 0.3352 |
| Mizoram                            | 0.2642 | 0.2715 | 0.2787 | 0.2861 | 0.2930 | 0.3005 | 0.3076 | 0.3145 | 0.3216 | 0.3277 | 0.3339 | 0.3400 | 0.3459 | 0.3520 | 0.3592 | 0.3687 | 0.3781 | 0.3899 | 0.3990 | 0.4073 |
| Nagaland                           | 0.2750 | 0.2831 | 0.2909 | 0.2988 | 0.3060 | 0.3136 | 0.3203 | 0.3267 | 0.3330 | 0.3383 | 0.3431 | 0.3483 | 0.3542 | 0.3599 | 0.3658 | 0.3713 | 0.3766 | 0.3828 | 0.3892 | 0.3950 |
| Odisha                             | 0.2091 | 0.2133 | 0.2174 | 0.2217 | 0.2257 | 0.2302 | 0.2344 | 0.2385 | 0.2429 | 0.2467 | 0.2507 | 0.2551 | 0.2588 | 0.2643 | 0.2687 | 0.2741 | 0.2802 | 0.2853 | 0.2917 | 0.2992 |
| Punjab                             | 0.2590 | 0.2658 | 0.2727 | 0.2800 | 0.2870 | 0.2944 | 0.3015 | 0.3083 | 0.3156 | 0.3225 | 0.3294 | 0.3368 | 0.3444 | 0.3517 | 0.3592 | 0.3670 | 0.3750 | 0.3833 | 0.3915 | 0.4006 |
| Rajasthan                          | 0.2102 | 0.2144 | 0.2186 | 0.2231 | 0.2272 | 0.2320 | 0.2365 | 0.2410 | 0.2457 | 0.2499 | 0.2541 | 0.2588 | 0.2635 | 0.2696 | 0.2749 | 0.2802 | 0.2863 | 0.2918 | 0.2994 | 0.3062 |
| Sikkim                             | 0.2200 | 0.2249 | 0.2296 | 0.2345 | 0.2390 | 0.2442 | 0.2491 | 0.2539 | 0.2589 | 0.2635 | 0.2684 | 0.2732 | 0.2785 | 0.2836 | 0.2899 | 0.2966 | 0.3043 | 0.3125 | 0.3207 | 0.3289 |
| Tamil Nadu                         | 0.2562 | 0.2614 | 0.2667 | 0.2723 | 0.2775 | 0.2831 | 0.2884 | 0.2936 | 0.2992 | 0.3041 | 0.3089 | 0.3146 | 0.3195 | 0.3245 | 0.3304 | 0.3366 | 0.3434 | 0.3511 | 0.3589 | 0.3675 |
| Telangana                          | 0.2285 | 0.2323 | 0.2360 | 0.2400 | 0.2436 | 0.2477 | 0.2514 | 0.2551 | 0.2590 | 0.2622 | 0.2653 | 0.2694 | 0.2732 | 0.2776 | 0.2817 | 0.2863 | 0.2908 | 0.2960 | 0.3025 | 0.3093 |
| Tripura                            | 0.2645 | 0.2702 | 0.2758 | 0.2816 | 0.2868 | 0.2926 | 0.2978 | 0.3027 | 0.3077 | 0.3116 | 0.3154 | 0.3195 | 0.3238 | 0.3276 | 0.3315 | 0.3350 | 0.3388 | 0.3425 | 0.3479 | 0.3530 |
| Uttar Pradesh                      | 0.2239 | 0.2278 | 0.2317 | 0.2359 | 0.2397 | 0.2440 | 0.2481 | 0.2522 | 0.2566 | 0.2604 | 0.2646 | 0.2685 | 0.2731 | 0.2776 | 0.2823 | 0.2874 | 0.2932 | 0.2990 | 0.3055 | 0.3124 |
| Uttarakhand                        | 0.2161 | 0.2204 | 0.2246 | 0.2288 | 0.2328 | 0.2372 | 0.2413 | 0.2450 | 0.2490 | 0.2528 | 0.2571 | 0.2618 | 0.2667 | 0.2718 | 0.2772 | 0.2828 | 0.2889 | 0.2952 | 0.3019 | 0.3089 |
| West Bengal                        | 0.2786 | 0.2834 | 0.2881 | 0.2931 | 0.2976 | 0.3026 | 0.3073 | 0.3118 | 0.3164 | 0.3201 | 0.3239 | 0.3275 | 0.3312 | 0.3349 | 0.3393 | 0.3432 | 0.3471 | 0.3520 | 0.3563 | 0.3610 |
| Union Territories other than Delhi | 0.3009 | 0.3090 | 0.3170 | 0.3254 | 0.3333 | 0.3416 | 0.3495 | 0.3571 | 0.3648 | 0.3724 | 0.3803 | 0.3885 | 0.3966 | 0.4046 | 0.4126 | 0.4204 | 0.4285 | 0.4365 | 0.4445 | 0.4525 |
| Andhra Pradesh, Urban              | 0.3344 | 0.3392 | 0.3439 | 0.3486 | 0.3528 | 0.3575 | 0.3617 | 0.3657 | 0.3700 | 0.3736 | 0.3771 | 0.3820 | 0.3868 | 0.3924 | 0.3975 | 0.4028 | 0.4078 | 0.4133 | 0.4199 | 0.4265 |
| Andhra Pradesh, Rural              | 0.2054 | 0.2088 | 0.2121 | 0.2156 | 0.2188 | 0.2225 | 0.2259 | 0.2293 | 0.2328 | 0.2358 | 0.2386 | 0.2423 | 0.2456 | 0.2494 | 0.2529 | 0.2567 | 0.2606 | 0.2650 | 0.2708 | 0.2769 |
| Arunachal Pradesh, Urban           | 0.3545 | 0.3601 | 0.3655 | 0.3711 | 0.3762 | 0.3818 | 0.3870 | 0.3920 | 0.3972 | 0.4017 | 0.4055 | 0.4107 | 0.4163 | 0.4215 | 0.4268 | 0.4327 | 0.4394 | 0.4452 | 0.4516 | 0.4570 |
| Arunachal Pradesh, Rural           | 0.2109 | 0.2151 | 0.2192 | 0.2235 | 0.2274 | 0.2318 | 0.2359 | 0.2398 | 0.2439 | 0.2476 | 0.2510 | 0.2556 | 0.2606 | 0.2655 | 0.2706 | 0.2764 | 0.2829 | 0.2891 | 0.2959 | 0.3022 |
| Assam, Urban                       | 0.3766 | 0.3843 | 0.3918 | 0.3994 | 0.4062 | 0.4137 | 0.4205 | 0.4269 | 0.4332 | 0.4382 | 0.4427 | 0.4487 | 0.4544 | 0.4602 | 0.4667 | 0.4726 | 0.4783 | 0.4840 | 0.4886 | 0.4939 |
| Assam, Rural                       | 0.2246 | 0.2296 | 0.2344 | 0.2396 | 0.2444 | 0.2498 | 0.2550 | 0.2600 | 0.2652 | 0.2698 | 0.2742 | 0.2800 | 0.2858 | 0.2921 | 0.2990 | 0.3060 | 0.3131 | 0.3204 | 0.3269 | 0.3341 |
| Bihar, Urban                       | 0.3156 | 0.3213 | 0.3270 | 0.3330 | 0.3385 | 0.3445 | 0.3499 | 0.3550 | 0.3605 | 0.3654 | 0.3703 | 0.3766 | 0.3841 | 0.3910 | 0.3986 | 0.4056 | 0.4134 | 0.4202 | 0.4277 | 0.4343 |
| Bihar, Rural                       | 0.1952 | 0.1985 | 0.2020 | 0.2057 | 0.2091 | 0.2131 | 0.2168 | 0.2204 | 0.2243 | 0.2277 | 0.2313 | 0.2352 | 0.2393 | 0.2432 | 0.2481 | 0.2528 | 0.2584 | 0.2636 | 0.2697 | 0.2753 |
| Chhattisgarh, Urban                | 0.3841 | 0.3919 | 0.3995 | 0.4072 | 0.4145 | 0.4221 | 0.4294 | 0.4363 | 0.4433 | 0.4497 | 0.4563 | 0.4623 | 0.4676 | 0.4725 | 0.4769 | 0.4809 | 0.4848 | 0.4886 | 0.4923 | 0.4961 |
| Chhattisgarh, Rural                | 0.1743 | 0.1772 | 0.1801 | 0.1830 | 0.1858 | 0.1889 | 0.1917 | 0.1943 | 0.1971 | 0.1998 | 0.2029 | 0.2065 | 0.2102 | 0.2142 | 0.2185 | 0.2228 | 0.2277 | 0.2328 | 0.2383 | 0.2443 |
| Delhi, Urban                       | 0.3883 | 0.3990 | 0.4094 | 0.4199 | 0.4295 | 0.4392 | 0.4481 | 0.4564 | 0.4645 | 0.4717 | 0.4785 | 0.4848 | 0.4913 | 0.4967 | 0.5015 | 0.5065 | 0.5116 | 0.5165 | 0.5214 | 0.5263 |
| Delhi, Rural                       | 0.3070 | 0.3158 | 0.3244 | 0.3332 | 0.3414 | 0.3499 | 0.3580 | 0.3657 | 0.3735 | 0.3807 | 0.3878 | 0.3948 | 0.4022 | 0.4090 | 0.4152 | 0.4218 | 0.4289 | 0.4359 | 0.4430 | 0.4503 |
| Goa, Urban                         | 0.3769 | 0.3857 | 0.3946 | 0.4037 | 0.4121 | 0.4208 | 0.4288 | 0.4367 | 0.4449 | 0.4519 | 0.4586 | 0.4644 | 0.4709 | 0.4763 | 0.4831 | 0.4885 | 0.4949 | 0.5011 | 0.5071 | 0.5137 |
| Goa, Rural                         | 0.2861 | 0.2941 | 0.3025 | 0.3112 | 0.3194 | 0.3277 | 0.3354 | 0.3430 | 0.3509 | 0.3582 | 0.3655 | 0.3721 | 0.3795 | 0.3861 | 0.3940 | 0.4010 | 0.4089 | 0.4167 | 0.4244 | 0.4328 |
| Gujarat, Urban                     | 0.3380 | 0.3457 | 0.3533 | 0.3609 | 0.3680 | 0.3755 | 0.3824 | 0.3890 | 0.3957 | 0.4018 | 0.4075 | 0.4150 | 0.4222 | 0.4307 | 0.4386 | 0.4456 | 0.4536 | 0.4594 | 0.4669 | 0.4742 |
| Gujarat, Rural                     | 0.2237 | 0.2285 | 0.2333 | 0.2383 | 0.2431 | 0.2484 | 0.2534 | 0.2583 | 0.2635 | 0.2683 | 0.2729 | 0.2783 | 0.2828 | 0.2887 | 0.2945 | 0.2998 | 0.3065 | 0.3118 | 0.3190 | 0.3264 |
| Haryana, Urban                     | 0.3571 | 0.3642 | 0.3714 | 0.3790 | 0.3862 | 0.3940 | 0.4012 | 0.4081 | 0.4152 | 0.4217 | 0.4282 | 0.4356 | 0.4442 | 0.4523 | 0.4597 | 0.4679 | 0.4757 | 0.4826 | 0.4906 | 0.4982 |
| Haryana, Rural                     | 0.2293 | 0.2341 | 0.2389 | 0.2443 | 0.2495 | 0.2553 | 0.2610 | 0.2665 | 0.2723 | 0.2780 | 0.2838 | 0.2896 | 0.2958 | 0.3020 | 0.3080 | 0.3150 | 0.3223 | 0.3292 | 0.3374 | 0.3455 |
| Himachal Pradesh, Urban            | 0.3665 | 0.3740 | 0.3813 | 0.3889 | 0.3957 | 0.4029 | 0.4093 | 0.4155 | 0.4220 | 0.4277 | 0.4332 | 0.4405 | 0.4487 | 0.4572 | 0.4643 | 0.4721 | 0.4801 | 0.4877 | 0.4965 | 0.5052 |
| Himachal Pradesh, Rural            | 0.2150 | 0.2202 | 0.2255 | 0.2313 | 0.2370 | 0.2432 | 0.2493 | 0.2555 | 0.2621 | 0.2685 | 0.2750 | 0.2822 | 0.2891 | 0.2968 | 0.3037 | 0.3116 | 0.3201 | 0.3286 | 0.3386 | 0.3490 |
| Jammu and Kashmir, Urban           | 0.3023 | 0.3091 | 0.3158 | 0.3227 | 0.3290 | 0.3358 | 0.3420 | 0.3479 | 0.3541 | 0.3599 | 0.3660 | 0.3736 | 0.3829 | 0.3921 | 0.4015 | 0.4106 | 0.4203 | 0.4281 | 0.4366 | 0.4444 |
| Jammu and Kashmir, Rural           | 0.1941 | 0.1990 | 0.2039 | 0.2091 | 0.2141 | 0.2198 | 0.2252 | 0.2306 | 0.2363 | 0.2416 | 0.2471 | 0.2525 | 0.2579 | 0.2634 | 0.2692 | 0.2751 | 0.2819 | 0.2875 | 0.2941 | 0.3005 |
| Jharkhand, Urban                   | 0.3962 | 0.4020 | 0.4077 | 0.4137 | 0.4193 | 0.4254 | 0.4311 | 0.4367 | 0.4423 | 0.4474 | 0.4527 | 0.4575 | 0.4617 | 0.4656 | 0.4692 | 0.4724 | 0.4759 | 0.4793 | 0.4831 | 0.4872 |
| Jharkhand, Rural                   | 0.2044 | 0.2074 | 0.2103 | 0.2133 | 0.2161 | 0.2192 | 0.2221 | 0.2246 | 0.2274 | 0.2299 | 0.2327 | 0.2357 | 0.2386 | 0.2416 | 0.2447 | 0.2478 | 0.2513 | 0.2550 | 0.2590 | 0.2635 |
| Karnataka, Urban                   | 0.3277 | 0.3345 | 0.3412 | 0.3482 | 0.3544 | 0.3612 | 0.3674 | 0.3734 | 0.3797 | 0.3854 | 0.3910 | 0.3975 | 0.4045 | 0.4119 | 0.4196 | 0.4265 | 0.4340 | 0.4413 | 0.4487 | 0.4562 |
| Karnataka, Rural                   | 0.2091 | 0.2132 | 0.2173 | 0.2216 | 0.2256 | 0.2301 | 0.2344 | 0.2386 | 0.2432 | 0.2472 | 0.2513 | 0.2555 | 0.2596 | 0.2642 | 0.2693 | 0.2741 | 0.2799 | 0.2859 | 0.2924 | 0.2994 |
| Kerala, Urban                      | 0.3381 | 0.3466 | 0.3548 | 0.3631 | 0.3703 | 0.3778 | 0.3846 | 0.3910 | 0.3974 | 0.4026 | 0.4077 | 0.4122 | 0.4172 | 0.4224 | 0.4278 | 0.4324 | 0.4378 | 0.4432 | 0.4483 | 0.4539 |
| Kerala, Rural                      | 0.2919 | 0.2992 | 0.3065 | 0.3139 | 0.3205 | 0.3277 | 0.3343 | 0.3407 | 0.3472 | 0.3527 | 0.3584 | 0.3631 | 0.3683 | 0.3738 | 0.3796 | 0.3849 | 0.3911 | 0.3975 | 0.4038 | 0.4106 |
| Madhya Pradesh, Urban              | 0.3499 | 0.3559 | 0.3618 | 0.3678 | 0.3731 | 0.3787 | 0.3838 | 0.3886 | 0.3938 | 0.3985 | 0.4033 | 0.4088 | 0.4152 | 0.4222 | 0.4284 | 0.4350 | 0.4409 | 0.4475 | 0.4546 | 0.4612 |
| Madhya Pradesh, Rural              | 0.1933 | 0.1966 | 0.1998 | 0.2033 | 0.2065 | 0.2103 | 0.2138 | 0.2174 | 0.2212 | 0.2248 | 0.2286 | 0.2323 | 0.2361 | 0.2405 | 0.2446 | 0.2494 | 0.2540 | 0.2597 | 0.2660 | 0.2722 |

| Appendix Table 5A. SDI Values by location, 1970-1989 |        |        |        |        |        |        |        |        |        |        |        |        |        |        |        |        |        |        |        |        |
|------------------------------------------------------|--------|--------|--------|--------|--------|--------|--------|--------|--------|--------|--------|--------|--------|--------|--------|--------|--------|--------|--------|--------|
| Location                                             | 1970   | 1971   | 1972   | 1973   | 1974   | 1975   | 1976   | 1977   | 1978   | 1979   | 1980   | 1981   | 1982   | 1983   | 1984   | 1985   | 1986   | 1987   | 1988   | 1989   |
| Maharashtra, Urban                                   | 0.3442 | 0.3526 | 0.3609 | 0.3693 | 0.3771 | 0.3851 | 0.3925 | 0.3998 | 0.4072 | 0.4141 | 0.4210 | 0.4284 | 0.4360 | 0.4436 | 0.4507 | 0.4579 | 0.4648 | 0.4716 | 0.4784 | 0.4858 |
| Maharashtra, Rural                                   | 0.2294 | 0.2346 | 0.2399 | 0.2456 | 0.2511 | 0.2572 | 0.2632 | 0.2692 | 0.2757 | 0.2818 | 0.2883 | 0.2948 | 0.3011 | 0.3077 | 0.3144 | 0.3216 | 0.3289 | 0.3368 | 0.3451 | 0.3544 |
| Manipur, Urban                                       | 0.2751 | 0.2834 | 0.2914 | 0.2995 | 0.3070 | 0.3147 | 0.3215 | 0.3277 | 0.3342 | 0.3400 | 0.3456 | 0.3531 | 0.3609 | 0.3691 | 0.3776 | 0.3855 | 0.3933 | 0.4022 | 0.4110 | 0.4191 |
| Manipur, Rural                                       | 0.2051 | 0.2110 | 0.2169 | 0.2231 | 0.2291 | 0.2354 | 0.2414 | 0.2472 | 0.2534 | 0.2595 | 0.2654 | 0.2722 | 0.2784 | 0.2850 | 0.2921 | 0.2989 | 0.3061 | 0.3148 | 0.3238 | 0.3323 |
| Meghalaya, Urban                                     | 0.3988 | 0.4067 | 0.4142 | 0.4219 | 0.4284 | 0.4351 | 0.4406 | 0.4454 | 0.4500 | 0.4531 | 0.4560 | 0.4586 | 0.4603 | 0.4618 | 0.4633 | 0.4646 | 0.4662 | 0.4683 | 0.4689 | 0.4711 |
| Meghalaya, Rural                                     | 0.2049 | 0.2096 | 0.2141 | 0.2189 | 0.2233 | 0.2281 | 0.2326 | 0.2370 | 0.2416 | 0.2456 | 0.2496 | 0.2539 | 0.2583 | 0.2629 | 0.2680 | 0.2733 | 0.2792 | 0.2860 | 0.2919 | 0.2992 |
| Mizoram, Urban                                       | 0.3076 | 0.3159 | 0.3239 | 0.3322 | 0.3398 | 0.3480 | 0.3556 | 0.3629 | 0.3703 | 0.3765 | 0.3827 | 0.3889 | 0.3949 | 0.4010 | 0.4081 | 0.4172 | 0.4262 | 0.4373 | 0.4457 | 0.4533 |
| Mizoram, Rural                                       | 0.2316 | 0.2378 | 0.2439 | 0.2502 | 0.2561 | 0.2627 | 0.2689 | 0.2750 | 0.2813 | 0.2867 | 0.2923 | 0.2978 | 0.3030 | 0.3085 | 0.3154 | 0.3246 | 0.3340 | 0.3457 | 0.3548 | 0.3632 |
| Nagaland, Urban                                      | 0.3853 | 0.3941 | 0.4023 | 0.4102 | 0.4170 | 0.4239 | 0.4296 | 0.4345 | 0.4393 | 0.4428 | 0.4459 | 0.4509 | 0.4583 | 0.4656 | 0.4731 | 0.4800 | 0.4864 | 0.4935 | 0.5006 | 0.5067 |
| Nagaland, Rural                                      | 0.2636 | 0.2712 | 0.2785 | 0.2860 | 0.2927 | 0.2999 | 0.3063 | 0.3124 | 0.3184 | 0.3233 | 0.3279 | 0.3326 | 0.3379 | 0.3429 | 0.3481 | 0.3528 | 0.3574 | 0.3628 | 0.3685 | 0.3736 |
| Odisha, Urban                                        | 0.3179 | 0.3237 | 0.3294 | 0.3353 | 0.3406 | 0.3463 | 0.3514 | 0.3562 | 0.3611 | 0.3654 | 0.3698 | 0.3756 | 0.3816 | 0.3895 | 0.3960 | 0.4032 | 0.4110 | 0.4172 | 0.4244 | 0.4322 |
| Odisha, Rural                                        | 0.1958 | 0.1995 | 0.2030 | 0.2068 | 0.2103 | 0.2143 | 0.2181 | 0.2218 | 0.2257 | 0.2291 | 0.2328 | 0.2366 | 0.2398 | 0.2446 | 0.2484 | 0.2532 | 0.2587 | 0.2632 | 0.2690 | 0.2758 |
| Punjab, Urban                                        | 0.3558 | 0.3644 | 0.3731 | 0.3821 | 0.3907 | 0.3999 | 0.4086 | 0.4170 | 0.4256 | 0.4335 | 0.4410 | 0.4487 | 0.4562 | 0.4632 | 0.4702 | 0.4772 | 0.4841 | 0.4913 | 0.4981 | 0.5056 |
| Punjab, Rural                                        | 0.2259 | 0.2314 | 0.2372 | 0.2432 | 0.2491 | 0.2554 | 0.2613 | 0.2671 | 0.2734 | 0.2795 | 0.2857 | 0.2925 | 0.2998 | 0.3068 | 0.3141 | 0.3217 | 0.3296 | 0.3379 | 0.3461 | 0.3551 |
| Rajasthan, Urban                                     | 0.3202 | 0.3256 | 0.3310 | 0.3366 | 0.3418 | 0.3475 | 0.3529 | 0.3583 | 0.3639 | 0.3688 | 0.3737 | 0.3789 | 0.3839 | 0.3903 | 0.3957 | 0.4009 | 0.4068 | 0.4119 | 0.4190 | 0.4251 |
| Rajasthan, Rural                                     | 0.1803 | 0.1840 | 0.1875 | 0.1914 | 0.1949 | 0.1990 | 0.2029 | 0.2067 | 0.2108 | 0.2143 | 0.2179 | 0.2219 | 0.2261 | 0.2316 | 0.2363 | 0.2410 | 0.2465 | 0.2514 | 0.2585 | 0.2648 |
| Sikkim, Urban                                        | 0.3070 | 0.3146 | 0.3216 | 0.3286 | 0.3350 | 0.3417 | 0.3480 | 0.3539 | 0.3599 | 0.3652 | 0.3706 | 0.3773 | 0.3860 | 0.3944 | 0.4041 | 0.4144 | 0.4258 | 0.4374 | 0.4483 | 0.4586 |
| Sikkim, Rural                                        | 0.2118 | 0.2163 | 0.2206 | 0.2251 | 0.2294 | 0.2342 | 0.2388 | 0.2433 | 0.2481 | 0.2524 | 0.2569 | 0.2613 | 0.2662 | 0.2708 | 0.2765 | 0.2827 | 0.2898 | 0.2975 | 0.3051 | 0.3128 |
| Tamil Nadu, Urban                                    | 0.3289 | 0.3355 | 0.3421 | 0.3490 | 0.3552 | 0.3619 | 0.3682 | 0.3743 | 0.3807 | 0.3862 | 0.3914 | 0.3975 | 0.4026 | 0.4076 | 0.4133 | 0.4191 | 0.4253 | 0.4322 | 0.4387 | 0.4458 |
| Tamil Nadu, Rural                                    | 0.2206 | 0.2247 | 0.2288 | 0.2333 | 0.2374 | 0.2421 | 0.2464 | 0.2509 | 0.2557 | 0.2600 | 0.2643 | 0.2697 | 0.2744 | 0.2795 | 0.2854 | 0.2919 | 0.2990 | 0.3070 | 0.3150 | 0.3238 |
| Telangana, Urban                                     | 0.3126 | 0.3190 | 0.3253 | 0.3317 | 0.3374 | 0.3436 | 0.3492 | 0.3546 | 0.3602 | 0.3652 | 0.3700 | 0.3762 | 0.3824 | 0.3894 | 0.3957 | 0.4024 | 0.4087 | 0.4155 | 0.4235 | 0.4316 |
| Telangana, Rural                                     | 0.1985 | 0.2014 | 0.2042 | 0.2072 | 0.2098 | 0.2128 | 0.2156 | 0.2182 | 0.2211 | 0.2233 | 0.2254 | 0.2283 | 0.2309 | 0.2341 | 0.2370 | 0.2403 | 0.2437 | 0.2478 | 0.2531 | 0.2588 |
| Tripura, Urban                                       | 0.3957 | 0.4026 | 0.4092 | 0.4158 | 0.4215 | 0.4276 | 0.4327 | 0.4373 | 0.4416 | 0.4444 | 0.4470 | 0.4499 | 0.4527 | 0.4546 | 0.4564 | 0.4576 | 0.4590 | 0.4601 | 0.4630 | 0.4654 |
| Tripura, Rural                                       | 0.2475 | 0.2527 | 0.2578 | 0.2631 | 0.2678 | 0.2731 | 0.2779 | 0.2825 | 0.2871 | 0.2907 | 0.2942 | 0.2981 | 0.3022 | 0.3059 | 0.3096 | 0.3131 | 0.3169 | 0.3205 | 0.3259 | 0.3311 |
| Uttar Pradesh, Urban                                 | 0.3187 | 0.3241 | 0.3293 | 0.3347 | 0.3394 | 0.3444 | 0.3491 | 0.3536 | 0.3583 | 0.3624 | 0.3668 | 0.3713 | 0.3768 | 0.3822 | 0.3874 | 0.3928 | 0.3986 | 0.4042 | 0.4104 | 0.4167 |
| Uttar Pradesh, Rural                                 | 0.2039 | 0.2075 | 0.2109 | 0.2146 | 0.2179 | 0.2216 | 0.2252 | 0.2288 | 0.2327 | 0.2360 | 0.2397 | 0.2430 | 0.2469 | 0.2508 | 0.2548 | 0.2593 | 0.2644 | 0.2697 | 0.2757 | 0.2821 |
| Uttarakhand, Urban                                   | 0.3403 | 0.3469 | 0.3533 | 0.3597 | 0.3658 | 0.3722 | 0.3782 | 0.3839 | 0.3899 | 0.3952 | 0.4009 | 0.4065 | 0.4117 | 0.4169 | 0.4221 | 0.4270 | 0.4322 | 0.4373 | 0.4425 | 0.4479 |
| Uttarakhand, Rural                                   | 0.1910 | 0.1944 | 0.1977 | 0.2010 | 0.2041 | 0.2075 | 0.2106 | 0.2134 | 0.2164 | 0.2193 | 0.2226 | 0.2265 | 0.2307 | 0.2351 | 0.2399 | 0.2448 | 0.2504 | 0.2563 | 0.2626 | 0.2693 |
| West Bengal, Urban                                   | 0.3872 | 0.3935 | 0.3995 | 0.4057 | 0.4112 | 0.4170 | 0.4223 | 0.4272 | 0.4321 | 0.4361 | 0.4399 | 0.4444 | 0.4496 | 0.4549 | 0.4607 | 0.4658 | 0.4706 | 0.4763 | 0.4811 | 0.4860 |
| West Bengal, Rural                                   | 0.2347 | 0.2390 | 0.2431 | 0.2475 | 0.2515 | 0.2560 | 0.2603 | 0.2644 | 0.2685 | 0.2719 | 0.2754 | 0.2785 | 0.2814 | 0.2844 | 0.2881 | 0.2914 | 0.2948 | 0.2992 | 0.3031 | 0.3075 |
| Union Territories other than Delhi, Rural            | 0.2419 | 0.2466 | 0.2515 | 0.2569 | 0.2620 | 0.2675 | 0.2728 | 0.2776 | 0.2826 | 0.2876 | 0.2930 | 0.2992 | 0.3058 | 0.3125 | 0.3192 | 0.3259 | 0.3331 | 0.3403 | 0.3476 | 0.3551 |
| Union Territories other than Delhi, Urban            | 0.4021 | 0.4096 | 0.4174 | 0.4256 | 0.4334 | 0.4416 | 0.4493 | 0.4566 | 0.4638 | 0.4702 | 0.4767 | 0.4827 | 0.4880 | 0.4929 | 0.4974 | 0.5014 | 0.5057 | 0.5099 | 0.5141 | 0.5186 |
| Sub-Saharan Africa                                   | 0.2122 | 0.2170 | 0.2217 | 0.2268 | 0.2321 | 0.2372 | 0.2424 | 0.2476 | 0.2527 | 0.2577 | 0.2627 | 0.2676 | 0.2724 | 0.2772 | 0.2820 | 0.2869 | 0.2909 | 0.2946 | 0.2984 | 0.3025 |
| Central Sub-Saharan Africa                           | 0.2187 | 0.2232 | 0.2275 | 0.2323 | 0.2372 | 0.2412 | 0.2450 | 0.2485 | 0.2516 | 0.2550 | 0.2587 | 0.2624 | 0.2664 | 0.2705 | 0.2752 | 0.2796 | 0.2833 | 0.2869 | 0.2907 | 0.2947 |
| Angola                                               | 0.1863 | 0.1903 | 0.1942 | 0.1983 | 0.2021 | 0.2050 | 0.2076 | 0.2101 | 0.2125 | 0.2151 | 0.2178 | 0.2203 | 0.2228 | 0.2255 | 0.2286 | 0.2321 | 0.2353 | 0.2391 | 0.2433 | 0.2477 |
| Central African Republic                             | 0.1804 | 0.1837 | 0.1868 | 0.1902 | 0.1932 | 0.1962 | 0.1994 | 0.2031 | 0.2066 | 0.2098 | 0.2125 | 0.2162 | 0.2196 | 0.2223 | 0.2257 | 0.2295 | 0.2332 | 0.2362 | 0.2396 | 0.2433 |
| Congo                                                | 0.2327 | 0.2388 | 0.2451 | 0.2518 | 0.2589 | 0.2658 | 0.2726 | 0.2786 | 0.2847 | 0.2916 | 0.2996 | 0.3081 | 0.3170 | 0.3262 | 0.3355 | 0.3440 | 0.3509 | 0.3577 | 0.3648 | 0.3723 |
| Democratic Republic of the Congo                     | 0.2126 | 0.2165 | 0.2201 | 0.2245 | 0.2291 | 0.2323 | 0.2349 | 0.2375 | 0.2397 | 0.2427 | 0.2459 | 0.2492 | 0.2530 | 0.2571 | 0.2624 | 0.2669 | 0.2707 | 0.2740 | 0.2774 | 0.2808 |
| Equatorial Guinea                                    | 0.1929 | 0.1962 | 0.1989 | 0.2021 | 0.2055 | 0.2100 | 0.2168 | 0.2240 | 0.2304 | 0.2363 | 0.2423 | 0.2521 | 0.2604 | 0.2681 | 0.2745 | 0.2794 | 0.2819 | 0.2837 | 0.2862 | 0.2888 |
| Gabon                                                | 0.2874 | 0.2952 | 0.3033 | 0.3119 | 0.3221 | 0.3326 | 0.3442 | 0.3541 | 0.3627 | 0.3715 | 0.3804 | 0.3891 | 0.3974 | 0.4057 | 0.4139 | 0.4218 | 0.4290 | 0.4353 | 0.4419 | 0.4497 |
| Eastern Sub-Saharan Africa                           | 0.1356 | 0.1389 | 0.1422 | 0.1458 | 0.1496 | 0.1537 | 0.1580 | 0.1625 | 0.1671 | 0.1716 | 0.1761 | 0.1806 | 0.1851 | 0.1900 | 0.1955 | 0.2011 | 0.2066 | 0.2118 | 0.2171 | 0.2225 |
| Burundi                                              | 0.0859 | 0.0899 | 0.0935 | 0.0974 | 0.1016 | 0.1057 | 0.1102 | 0.1155 | 0.1207 | 0.1260 | 0.1311 | 0.1366 | 0.1420 | 0.1478 | 0.1537 | 0.1600 | 0.1662 | 0.1721 | 0.1778 | 0.1831 |
| Comoros                                              | 0.1635 | 0.1676 | 0.1716 | 0.1756 | 0.1801 | 0.1846 | 0.1891 | 0.1935 | 0.1981 | 0.2030 | 0.2081 | 0.2134 | 0.2190 | 0.2251 | 0.2318 | 0.2388 | 0.2460 | 0.2531 | 0.2604 | 0.2675 |
| Djibouti                                             | 0.0722 | 0.0734 | 0.0746 | 0.0758 | 0.0769 | 0.0780 | 0.0793 | 0.0804 | 0.0813 | 0.0822 | 0.0833 | 0.1001 | 0.1102 | 0.1214 | 0.1348 | 0.1479 | 0.1599 | 0.1708 | 0.1806 | 0.1899 |
| Eritrea                                              | 0.1077 | 0.1110 | 0.1142 | 0.1175 | 0.1210 | 0.1244 | 0.1280 | 0.1316 | 0.1353 | 0.1392 | 0.1429 | 0.1465 | 0.1501 | 0.1539 | 0.1582 | 0.1628 | 0.1675 | 0.1722 | 0.1771 | 0.1822 |
| Ethiopia                                             | 0.0969 | 0.0991 | 0.1016 | 0.1042 | 0.1064 | 0.1090 | 0.1116 | 0.1140 | 0.1166 | 0.1189 | 0.1217 | 0.1249 | 0.1282 | 0.1322 | 0.1363 | 0.1390 | 0.1419 | 0.1449 | 0.1477 | 0.1502 |
| Kenya                                                | 0.0807 | 0.0917 | 0.1052 | 0.1179 | 0.1326 | 0.1485 | 0.1635 | 0.1780 | 0.1923 | 0.2062 | 0.2196 | 0.2325 | 0.2449 | 0.2572 | 0.2692 | 0.2804 | 0.2914 | 0.3020 | 0.3125 | 0.3234 |
| Madagascar                                           | 0.1373 | 0.1425 | 0.1477 | 0.1531 | 0.1589 | 0.1649 | 0.1709 | 0.1771 | 0.1830 | 0.1891 | 0.1954 | 0.2013 | 0.2069 | 0.2128 | 0.2192 | 0.2257 | 0.2321 | 0.2381 | 0.2438 | 0.2493 |
| Malawi                                               | 0.0909 | 0.0951 | 0.0998 | 0.1046 | 0.1096 | 0.1148 | 0.1201 | 0.1256 | 0.1313 | 0.1370 | 0.1429 | 0.1487 | 0.1545 | 0.1607 | 0.1674 | 0.1746 | 0.1816 | 0.1880 | 0.1938 | 0.1994 |

| Appendix Table 5A. SDI Values by location, 1970-1989 |        |        |        |        |        |        |        |        |        |        |        |        |        |        |        |        |        |        |        |        |  |
|------------------------------------------------------|--------|--------|--------|--------|--------|--------|--------|--------|--------|--------|--------|--------|--------|--------|--------|--------|--------|--------|--------|--------|--|
| Location                                             | 1970   | 1971   | 1972   | 1973   | 1974   | 1975   | 1976   | 1977   | 1978   | 1979   | 1980   | 1981   | 1982   | 1983   | 1984   | 1985   | 1986   | 1987   | 1988   | 1989   |  |
| Mozambique                                           | 0.1035 | 0.1066 | 0.1096 | 0.1127 | 0.1157 | 0.1184 | 0.1212 | 0.1237 | 0.1260 | 0.1283 | 0.1307 | 0.1333 | 0.1353 | 0.1360 | 0.1370 | 0.1376 | 0.1381 | 0.1386 | 0.1396 | 0.1420 |  |
| Rwanda                                               | 0.0534 | 0.0546 | 0.0558 | 0.0569 | 0.0580 | 0.0591 | 0.0603 | 0.0616 | 0.0627 | 0.0641 | 0.0654 | 0.0667 | 0.0678 | 0.0688 | 0.0699 | 0.0708 | 0.0886 | 0.1200 | 0.1436 | 0.1637 |  |
| Somalia                                              | 0.1394 | 0.1412 | 0.1438 | 0.1459 | 0.1472 | 0.1499 | 0.1519 | 0.1548 | 0.1576 | 0.1594 | 0.1605 | 0.1622 | 0.1644 | 0.1660 | 0.1680 | 0.1706 | 0.1732 | 0.1764 | 0.1797 | 0.1833 |  |
| Tanzania                                             | 0.1118 | 0.1172 | 0.1227 | 0.1288 | 0.1351 | 0.1416 | 0.1483 | 0.1550 | 0.1619 | 0.1689 | 0.1761 | 0.1832 | 0.1900 | 0.1970 | 0.2046 | 0.2128 | 0.2201 | 0.2265 | 0.2330 | 0.2391 |  |
| Uganda                                               | 0.0642 | 0.0654 | 0.0667 | 0.0679 | 0.0690 | 0.0699 | 0.0708 | 0.0718 | 0.0779 | 0.0908 | 0.1012 | 0.1097 | 0.1174 | 0.1254 | 0.1338 | 0.1418 | 0.1492 | 0.1561 | 0.1629 | 0.1698 |  |
| Zambia                                               | 0.0888 | 0.0901 | 0.0915 | 0.0928 | 0.0941 | 0.1160 | 0.1353 | 0.1520 | 0.1668 | 0.1804 | 0.1930 | 0.2051 | 0.2163 | 0.2275 | 0.2391 | 0.2506 | 0.2613 | 0.2714 | 0.2814 | 0.2905 |  |
| South Sudan                                          | 0.0464 | 0.0471 | 0.0478 | 0.0485 | 0.0491 | 0.0498 | 0.0505 | 0.0511 | 0.0518 | 0.0525 | 0.0531 | 0.0538 | 0.0544 | 0.0551 | 0.0557 | 0.0564 | 0.0570 | 0.0623 | 0.0701 | 0.0767 |  |
| Central                                              | 0.1580 | 0.1698 | 0.1815 | 0.1933 | 0.2066 | 0.2210 | 0.2353 | 0.2498 | 0.2644 | 0.2786 | 0.2920 | 0.3050 | 0.3177 | 0.3305 | 0.3434 | 0.3557 | 0.3678 | 0.3792 | 0.3903 | 0.4014 |  |
| Coast                                                | 0.0721 | 0.0737 | 0.0753 | 0.0769 | 0.0786 | 0.0800 | 0.0815 | 0.0880 | 0.1110 | 0.1299 | 0.1456 | 0.1596 | 0.1725 | 0.1847 | 0.1955 | 0.2048 | 0.2138 | 0.2224 | 0.2312 | 0.2406 |  |
| Eastern                                              | 0.0740 | 0.0757 | 0.0775 | 0.0833 | 0.1021 | 0.1208 | 0.1374 | 0.1530 | 0.1681 | 0.1827 | 0.1960 | 0.2088 | 0.2210 | 0.2331 | 0.2448 | 0.2557 | 0.2664 | 0.2768 | 0.2871 | 0.2977 |  |
| Nairobi                                              | 0.2947 | 0.3066 | 0.3186 | 0.3306 | 0.3433 | 0.3560 | 0.3686 | 0.3820 | 0.3954 | 0.4080 | 0.4197 | 0.4308 | 0.4417 | 0.4527 | 0.4642 | 0.4754 | 0.4863 | 0.4964 | 0.5062 | 0.5158 |  |
| North Eastern                                        | 0.0398 | 0.0407 | 0.0417 | 0.0426 | 0.0436 | 0.0445 | 0.0454 | 0.0464 | 0.0475 | 0.0485 | 0.0493 | 0.0502 | 0.0510 | 0.0518 | 0.0527 | 0.0535 | 0.0544 | 0.0553 | 0.0562 | 0.0571 |  |
| Nyanza                                               | 0.0769 | 0.0786 | 0.0804 | 0.0934 | 0.1108 | 0.1288 | 0.1451 | 0.1606 | 0.1758 | 0.1904 | 0.2037 | 0.2165 | 0.2287 | 0.2408 | 0.2526 | 0.2635 | 0.2743 | 0.2847 | 0.2951 | 0.3058 |  |
| Rift Valley                                          | 0.0807 | 0.0822 | 0.0838 | 0.0854 | 0.0869 | 0.0883 | 0.0896 | 0.1135 | 0.1367 | 0.1565 | 0.1732 | 0.1883 | 0.2023 | 0.2156 | 0.2277 | 0.2386 | 0.2491 | 0.2592 | 0.2693 | 0.2798 |  |
| Western                                              | 0.0848 | 0.0954 | 0.1105 | 0.1243 | 0.1398 | 0.1563 | 0.1717 | 0.1866 | 0.2011 | 0.2151 | 0.2277 | 0.2397 | 0.2512 | 0.2626 | 0.2736 | 0.2837 | 0.2936 | 0.3030 | 0.3121 | 0.3216 |  |
| Kiambu                                               | 0.1584 | 0.1729 | 0.1870 | 0.2010 | 0.2166 | 0.2333 | 0.2496 | 0.2659 | 0.2822 | 0.2980 | 0.3127 | 0.3270 | 0.3408 | 0.3546 | 0.3684 | 0.3816 | 0.3945 | 0.4065 | 0.4181 | 0.4292 |  |
| Kirinyaga                                            | 0.1700 | 0.1789 | 0.1879 | 0.1972 | 0.2080 | 0.2197 | 0.2314 | 0.2437 | 0.2560 | 0.2682 | 0.2799 | 0.2915 | 0.3029 | 0.3144 | 0.3260 | 0.3371 | 0.3481 | 0.3585 | 0.3687 | 0.3787 |  |
| Murang'a                                             | 0.1459 | 0.1578 | 0.1693 | 0.1810 | 0.1941 | 0.2084 | 0.2224 | 0.2366 | 0.2509 | 0.2647 | 0.2777 | 0.2903 | 0.3026 | 0.3151 | 0.3277 | 0.3398 | 0.3517 | 0.3628 | 0.3736 | 0.3843 |  |
| Nyandarua                                            | 0.1391 | 0.1498 | 0.1603 | 0.1709 | 0.1831 | 0.1965 | 0.2097 | 0.2232 | 0.2368 | 0.2500 | 0.2627 | 0.2751 | 0.2872 | 0.2997 | 0.3125 | 0.3248 | 0.3369 | 0.3484 | 0.3598 | 0.3713 |  |
| Nyeri                                                | 0.1592 | 0.1707 | 0.1822 | 0.1940 | 0.2071 | 0.2210 | 0.2349 | 0.2494 | 0.2640 | 0.2782 | 0.2920 | 0.3054 | 0.3184 | 0.3315 | 0.3448 | 0.3575 | 0.3703 | 0.3824 | 0.3942 | 0.4066 |  |
| Kilifi                                               | 0.0708 | 0.0723 | 0.0738 | 0.0752 | 0.0767 | 0.0781 | 0.0794 | 0.0809 | 0.0823 | 0.0837 | 0.0849 | 0.0861 | 0.0872 | 0.0882 | 0.0892 | 0.0901 | 0.0978 | 0.1111 | 0.1225 | 0.1342 |  |
| Kwale                                                | 0.0660 | 0.0675 | 0.0692 | 0.0707 | 0.0723 | 0.0738 | 0.0752 | 0.0887 | 0.1042 | 0.1186 | 0.1303 | 0.1411 | 0.1512 | 0.1611 | 0.1700 | 0.1774 | 0.1849 | 0.1923 | 0.2003 | 0.2094 |  |
| Lamu                                                 | 0.0724 | 0.0738 | 0.0753 | 0.0768 | 0.0783 | 0.0891 | 0.1081 | 0.1249 | 0.1404 | 0.1552 | 0.1683 | 0.1809 | 0.1929 | 0.2046 | 0.2150 | 0.2241 | 0.2328 | 0.2410 | 0.2488 | 0.2554 |  |
| Mombasa                                              | 0.1240 | 0.1334 | 0.1433 | 0.1536 | 0.1656 | 0.1788 | 0.1919 | 0.2057 | 0.2198 | 0.2337 | 0.2463 | 0.2586 | 0.2707 | 0.2826 | 0.2941 | 0.3048 | 0.3155 | 0.3260 | 0.3366 | 0.3475 |  |
| TaitaTaveta                                          | 0.0718 | 0.0735 | 0.0753 | 0.0770 | 0.0787 | 0.0803 | 0.0819 | 0.0836 | 0.1149 | 0.1380 | 0.1559 | 0.1718 | 0.1863 | 0.1999 | 0.2120 | 0.2226 | 0.2327 | 0.2425 | 0.2525 | 0.2633 |  |
| TanaRiver                                            | 0.0493 | 0.0509 | 0.0525 | 0.0540 | 0.0556 | 0.0569 | 0.0582 | 0.0598 | 0.0613 | 0.0627 | 0.0640 | 0.0651 | 0.0662 | 0.0770 | 0.0845 | 0.0879 | 0.0905 | 0.0919 | 0.0933 | 0.0972 |  |
| Embu                                                 | 0.1114 | 0.1220 | 0.1325 | 0.1432 | 0.1555 | 0.1689 | 0.1821 | 0.1958 | 0.2098 | 0.2236 | 0.2368 | 0.2496 | 0.2620 | 0.2744 | 0.2866 | 0.2982 | 0.3096 | 0.3205 | 0.3313 | 0.3418 |  |
| Isiolo                                               | 0.1407 | 0.1454 | 0.1502 | 0.1549 | 0.1605 | 0.1673 | 0.1742 | 0.1818 | 0.1897 | 0.1978 | 0.2050 | 0.2120 | 0.2190 | 0.2261 | 0.2331 | 0.2396 | 0.2460 | 0.2521 | 0.2581 | 0.2636 |  |
| Kitui                                                | 0.0648 | 0.0664 | 0.0682 | 0.0698 | 0.0715 | 0.0730 | 0.0745 | 0.0917 | 0.1119 | 0.1294 | 0.1445 | 0.1582 | 0.1709 | 0.1834 | 0.1955 | 0.2065 | 0.2173 | 0.2273 | 0.2369 | 0.2458 |  |
| Machakos                                             | 0.0798 | 0.0817 | 0.0835 | 0.0854 | 0.0872 | 0.0889 | 0.1013 | 0.1319 | 0.1557 | 0.1764 | 0.1940 | 0.2102 | 0.2253 | 0.2398 | 0.2535 | 0.2661 | 0.2783 | 0.2902 | 0.3020 | 0.3148 |  |
| Makueni                                              | 0.0811 | 0.0827 | 0.0843 | 0.0859 | 0.0875 | 0.0889 | 0.0903 | 0.0919 | 0.0934 | 0.1279 | 0.1537 | 0.1747 | 0.1928 | 0.2098 | 0.2253 | 0.2392 | 0.2522 | 0.2644 | 0.2762 | 0.2879 |  |
| Marsabit                                             | 0.1425 | 0.1458 | 0.1492 | 0.1525 | 0.1563 | 0.1603 | 0.1644 | 0.1691 | 0.1741 | 0.1793 | 0.1841 | 0.1887 | 0.1933 | 0.1980 | 0.2027 | 0.2072 | 0.2118 | 0.2162 | 0.2204 | 0.2242 |  |
| Meru                                                 | 0.0987 | 0.1067 | 0.1150 | 0.1239 | 0.1349 | 0.1476 | 0.1602 | 0.1728 | 0.1855 | 0.1979 | 0.2094 | 0.2209 | 0.2320 | 0.2432 | 0.2540 | 0.2640 | 0.2742 | 0.2842 | 0.2943 | 0.3053 |  |
| TharakaNithi                                         | 0.0951 | 0.1031 | 0.1110 | 0.1194 | 0.1298 | 0.1419 | 0.1539 | 0.1665 | 0.1795 | 0.1925 | 0.2045 | 0.2159 | 0.2271 | 0.2384 | 0.2496 | 0.2605 | 0.2714 | 0.2820 | 0.2926 | 0.3032 |  |
| Nairobi                                              | 0.2947 | 0.3066 | 0.3186 | 0.3306 | 0.3433 | 0.3560 | 0.3686 | 0.3820 | 0.3954 | 0.4080 | 0.4197 | 0.4308 | 0.4417 | 0.4527 | 0.4642 | 0.4754 | 0.4863 | 0.4964 | 0.5062 | 0.5158 |  |
| Garissa                                              | 0.0397 | 0.0409 | 0.0421 | 0.0433 | 0.0446 | 0.0457 | 0.0468 | 0.0481 | 0.0494 | 0.0506 | 0.0517 | 0.0527 | 0.0538 | 0.0548 | 0.0558 | 0.0568 | 0.0578 | 0.0589 | 0.0600 | 0.0611 |  |
| Mandera                                              | 0.0346 | 0.0356 | 0.0366 | 0.0377 | 0.0387 | 0.0397 | 0.0406 | 0.0417 | 0.0428 | 0.0439 | 0.0450 | 0.0460 | 0.0470 | 0.0480 | 0.0490 | 0.0500 | 0.0510 | 0.0521 | 0.0532 | 0.0543 |  |
| Wajir                                                | 0.0400 | 0.0408 | 0.0416 | 0.0425 | 0.0433 | 0.0441 | 0.0449 | 0.0458 | 0.0466 | 0.0475 | 0.0482 | 0.0489 | 0.0496 | 0.0503 | 0.0510 | 0.0517 | 0.0524 | 0.0531 | 0.0538 | 0.0546 |  |
| HomaBay                                              | 0.0761 | 0.0778 | 0.0795 | 0.0811 | 0.0827 | 0.0842 | 0.0886 | 0.1155 | 0.1370 | 0.1561 | 0.1727 | 0.1880 | 0.2021 | 0.2158 | 0.2288 | 0.2403 | 0.2512 | 0.2613 | 0.2710 | 0.2805 |  |
| Kisii                                                | 0.0784 | 0.0802 | 0.0820 | 0.0877 | 0.1085 | 0.1286 | 0.1461 | 0.1624 | 0.1777 | 0.1924 | 0.2055 | 0.2181 | 0.2303 | 0.2422 | 0.2536 | 0.2642 | 0.2748 | 0.2853 | 0.2960 | 0.3078 |  |
| Kisumu                                               | 0.0809 | 0.0826 | 0.0844 | 0.0873 | 0.1099 | 0.1314 | 0.1500 | 0.1672 | 0.1840 | 0.1998 | 0.2142 | 0.2277 | 0.2407 | 0.2536 | 0.2660 | 0.2779 | 0.2897 | 0.3014 | 0.3132 | 0.3260 |  |
| Migori                                               | 0.0768 | 0.0785 | 0.0802 | 0.0819 | 0.0836 | 0.0851 | 0.1090 | 0.1297 | 0.1482 | 0.1653 | 0.1804 | 0.1944 | 0.2075 | 0.2205 | 0.2328 | 0.2439 | 0.2545 | 0.2644 | 0.2739 | 0.2833 |  |
| Nyamira                                              | 0.1563 | 0.1645 | 0.1728 | 0.1815 | 0.1917 | 0.2035 | 0.2156 | 0.2286 | 0.2419 | 0.2552 | 0.2675 | 0.2797 | 0.2918 | 0.3040 | 0.3163 | 0.3281 | 0.3399 | 0.3513 | 0.3626 | 0.3735 |  |
| Siaya                                                | 0.0740 | 0.0804 | 0.0872 | 0.0944 | 0.1032 | 0.1131 | 0.1230 | 0.1335 | 0.1445 | 0.1555 | 0.1659 | 0.1760 | 0.1860 | 0.1960 | 0.2059 | 0.2153 | 0.2249 | 0.2342 | 0.2436 | 0.2531 |  |
| Baringo                                              | 0.0812 | 0.0826 | 0.0841 | 0.0855 | 0.0869 | 0.0882 | 0.0894 | 0.0908 | 0.1001 | 0.1295 | 0.1509 | 0.1692 | 0.1854 | 0.2002 | 0.2135 | 0.2251 | 0.2362 | 0.2469 | 0.2576 | 0.2683 |  |
| Bomet                                                | 0.0834 | 0.0851 | 0.0869 | 0.0886 | 0.0903 | 0.0919 | 0.0934 | 0.0950 | 0.0967 | 0.0982 | 0.0994 | 0.1077 | 0.1434 | 0.1689 | 0.1888 | 0.2045 | 0.2184 | 0.2309 | 0.2425 | 0.2542 |  |
| Elgeyo-Marakwet                                      | 0.0732 | 0.0748 | 0.0765 | 0.0782 | 0.0799 | 0.0814 | 0.0829 | 0.0846 | 0.1010 | 0.1285 | 0.1492 | 0.1670 | 0.1829 | 0.1975 | 0.2108 | 0.2226 | 0.2340 | 0.2449 | 0.2554 | 0.2661 |  |
| Kajiado                                              | 0.0843 | 0.0858 | 0.0874 | 0.0890 | 0.0906 | 0.0920 | 0.1171 | 0.1411 | 0.1617 | 0.1803 | 0.1970 | 0.2126 | 0.2273 | 0.2413 | 0.2545 | 0.2665 | 0.2783 | 0.2897 | 0.3010 | 0.3126 |  |
| Kericho                                              | 0.0773 | 0.0791 | 0.0809 | 0.0827 | 0.0845 | 0.0861 | 0.0877 | 0.0895 | 0.0912 | 0.0929 | 0.0943 | 0.0956 | 0.1079 | 0.1351 | 0.1545 | 0.1693 | 0.1828 | 0.1956 | 0.2084 | 0.2236 |  |



| Appendix Table 5A. SDI Values by location, 1970-1989 |        |        |        |        |        |        |        |        |        |        |        |        |        |        |        |        |        |        |        |        |  |
|------------------------------------------------------|--------|--------|--------|--------|--------|--------|--------|--------|--------|--------|--------|--------|--------|--------|--------|--------|--------|--------|--------|--------|--|
| Location                                             | 1970   | 1971   | 1972   | 1973   | 1974   | 1975   | 1976   | 1977   | 1978   | 1979   | 1980   | 1981   | 1982   | 1983   | 1984   | 1985   | 1986   | 1987   | 1988   | 1989   |  |
| Laikipia                                             | 0.1063 | 0.1154 | 0.1247 | 0.1348 | 0.1472 | 0.1612 | 0.1750 | 0.1888 | 0.2026 | 0.2163 | 0.2288 | 0.2412 | 0.2532 | 0.2651 | 0.2763 | 0.2867 | 0.2970 | 0.3069 | 0.3170 | 0.3268 |  |
| Nakuru                                               | 0.0867 | 0.0971 | 0.1074 | 0.1175 | 0.1295 | 0.1427 | 0.1556 | 0.1689 | 0.1825 | 0.1958 | 0.2084 | 0.2206 | 0.2324 | 0.2440 | 0.2552 | 0.2658 | 0.2766 | 0.2871 | 0.2978 | 0.3087 |  |
| Nandi                                                | 0.0844 | 0.0859 | 0.0875 | 0.0891 | 0.0906 | 0.0921 | 0.0935 | 0.0950 | 0.0965 | 0.0980 | 0.0992 | 0.1242 | 0.1515 | 0.1732 | 0.1910 | 0.2057 | 0.2192 | 0.2317 | 0.2438 | 0.2562 |  |
| Narok                                                | 0.0727 | 0.0741 | 0.0756 | 0.0770 | 0.0784 | 0.0797 | 0.0809 | 0.0823 | 0.0837 | 0.0849 | 0.1064 | 0.1253 | 0.1411 | 0.1555 | 0.1678 | 0.1781 | 0.1880 | 0.1978 | 0.2077 | 0.2186 |  |
| Samburu                                              | 0.1219 | 0.1249 | 0.1279 | 0.1309 | 0.1350 | 0.1401 | 0.1454 | 0.1509 | 0.1567 | 0.1629 | 0.1692 | 0.1752 | 0.1809 | 0.1866 | 0.1918 | 0.1963 | 0.2007 | 0.2048 | 0.2089 | 0.2125 |  |
| TransNzoia                                           | 0.0851 | 0.0867 | 0.0884 | 0.0900 | 0.0917 | 0.0931 | 0.0946 | 0.0961 | 0.0977 | 0.0992 | 0.1032 | 0.1373 | 0.1608 | 0.1804 | 0.1966 | 0.2096 | 0.2217 | 0.2335 | 0.2458 | 0.2605 |  |
| Turkana                                              | 0.1416 | 0.1447 | 0.1477 | 0.1507 | 0.1545 | 0.1591 | 0.1639 | 0.1690 | 0.1745 | 0.1803 | 0.1852 | 0.1901 | 0.1949 | 0.1999 | 0.2047 | 0.2089 | 0.2130 | 0.2167 | 0.2201 | 0.2227 |  |
| UasinGishu                                           | 0.0876 | 0.0893 | 0.0910 | 0.0927 | 0.0944 | 0.0959 | 0.0975 | 0.0991 | 0.1318 | 0.1608 | 0.1831 | 0.2024 | 0.2201 | 0.2368 | 0.2521 | 0.2657 | 0.2787 | 0.2912 | 0.3034 | 0.3156 |  |
| WestPokot                                            | 0.0865 | 0.0904 | 0.0943 | 0.0986 | 0.1049 | 0.1126 | 0.1203 | 0.1282 | 0.1363 | 0.1447 | 0.1527 | 0.1604 | 0.1681 | 0.1758 | 0.1831 | 0.1896 | 0.1964 | 0.2033 | 0.2107 | 0.2195 |  |
| Bungoma                                              | 0.0845 | 0.0861 | 0.0878 | 0.0894 | 0.0910 | 0.0924 | 0.1152 | 0.1415 | 0.1634 | 0.1828 | 0.1993 | 0.2143 | 0.2282 | 0.2417 | 0.2545 | 0.2659 | 0.2767 | 0.2866 | 0.2958 | 0.3052 |  |
| Busia                                                | 0.1258 | 0.1349 | 0.1440 | 0.1530 | 0.1638 | 0.1760 | 0.1880 | 0.2001 | 0.2123 | 0.2243 | 0.2351 | 0.2455 | 0.2556 | 0.2658 | 0.2758 | 0.2852 | 0.2943 | 0.3031 | 0.3118 | 0.3206 |  |
| Kakamega                                             | 0.0996 | 0.1125 | 0.1240 | 0.1356 | 0.1493 | 0.1641 | 0.1783 | 0.1920 | 0.2053 | 0.2183 | 0.2300 | 0.2413 | 0.2521 | 0.2628 | 0.2732 | 0.2828 | 0.2923 | 0.3015 | 0.3109 | 0.3208 |  |
| Vihiga                                               | 0.1383 | 0.1482 | 0.1582 | 0.1683 | 0.1801 | 0.1931 | 0.2059 | 0.2190 | 0.2324 | 0.2455 | 0.2578 | 0.2696 | 0.2812 | 0.2927 | 0.3041 | 0.3147 | 0.3250 | 0.3345 | 0.3437 | 0.3524 |  |
| Southern Sub-Saharan Africa                          | 0.4474 | 0.4534 | 0.4595 | 0.4658 | 0.4722 | 0.4780 | 0.4836 | 0.4888 | 0.4940 | 0.4993 | 0.5052 | 0.5110 | 0.5164 | 0.5214 | 0.5266 | 0.5314 | 0.5359 | 0.5406 | 0.5462 | 0.5523 |  |
| Botswana                                             | 0.2979 | 0.3084 | 0.3209 | 0.3340 | 0.3461 | 0.3569 | 0.3673 | 0.3768 | 0.3860 | 0.3951 | 0.4044 | 0.4136 | 0.4228 | 0.4319 | 0.4411 | 0.4507 | 0.4608 | 0.4710 | 0.4840 | 0.4973 |  |
| Lesotho                                              | 0.2574 | 0.2608 | 0.2659 | 0.2737 | 0.2808 | 0.2862 | 0.2924 | 0.3006 | 0.3105 | 0.3172 | 0.3229 | 0.3281 | 0.3326 | 0.3365 | 0.3406 | 0.3448 | 0.3489 | 0.3527 | 0.3578 | 0.3639 |  |
| Namibia                                              | 0.3176 | 0.3232 | 0.3288 | 0.3345 | 0.3403 | 0.3460 | 0.3514 | 0.3568 | 0.3623 | 0.3680 | 0.3743 | 0.3800 | 0.3854 | 0.3902 | 0.3949 | 0.3995 | 0.4045 | 0.4099 | 0.4158 | 0.4219 |  |
| South Africa                                         | 0.4857 | 0.4917 | 0.4975 | 0.5037 | 0.5099 | 0.5156 | 0.5210 | 0.5260 | 0.5312 | 0.5365 | 0.5425 | 0.5483 | 0.5538 | 0.5589 | 0.5642 | 0.5692 | 0.5738 | 0.5787 | 0.5843 | 0.5901 |  |
| Swaziland                                            | 0.3119 | 0.3197 | 0.3279 | 0.3353 | 0.3428 | 0.3513 | 0.3596 | 0.3668 | 0.3731 | 0.3787 | 0.3844 | 0.3913 | 0.3979 | 0.4042 | 0.4099 | 0.4151 | 0.4215 | 0.4291 | 0.4371 | 0.4456 |  |
| Zimbabwe                                             | 0.2923 | 0.3001 | 0.3084 | 0.3164 | 0.3243 | 0.3312 | 0.3374 | 0.3423 | 0.3472 | 0.3519 | 0.3571 | 0.3637 | 0.3703 | 0.3773 | 0.3835 | 0.3903 | 0.3969 | 0.4033 | 0.4121 | 0.4224 |  |
| Eastern Cape                                         | 0.4350 | 0.4417 | 0.4481 | 0.4550 | 0.4619 | 0.4679 | 0.4735 | 0.4784 | 0.4834 | 0.4887 | 0.4949 | 0.5010 | 0.5064 | 0.5112 | 0.5163 | 0.5206 | 0.5244 | 0.5285 | 0.5333 | 0.5384 |  |
| Free State                                           | 0.4965 | 0.5017 | 0.5068 | 0.5122 | 0.5177 | 0.5227 | 0.5274 | 0.5317 | 0.5361 | 0.5407 | 0.5459 | 0.5509 | 0.5556 | 0.5599 | 0.5644 | 0.5685 | 0.5723 | 0.5764 | 0.5812 | 0.5864 |  |
| Gauteng                                              | 0.6185 | 0.6225 | 0.6263 | 0.6304 | 0.6345 | 0.6382 | 0.6418 | 0.6452 | 0.6487 | 0.6523 | 0.6562 | 0.6601 | 0.6637 | 0.6672 | 0.6708 | 0.6742 | 0.6773 | 0.6806 | 0.6844 | 0.6883 |  |
| KwaZulu-Natal                                        | 0.4668 | 0.4726 | 0.4783 | 0.4844 | 0.4905 | 0.4960 | 0.5011 | 0.5059 | 0.5107 | 0.5158 | 0.5215 | 0.5271 | 0.5321 | 0.5369 | 0.5418 | 0.5463 | 0.5506 | 0.5550 | 0.5603 | 0.5658 |  |
| Limpopo                                              | 0.3845 | 0.3909 | 0.3972 | 0.4039 | 0.4109 | 0.4171 | 0.4230 | 0.4285 | 0.4342 | 0.4402 | 0.4472 | 0.4541 | 0.4606 | 0.4666 | 0.4730 | 0.4789 | 0.4844 | 0.4903 | 0.4970 | 0.5041 |  |
| Mpumalanga                                           | 0.4367 | 0.4425 | 0.4483 | 0.4545 | 0.4608 | 0.4666 | 0.4723 | 0.4777 | 0.4832 | 0.4891 | 0.4954 | 0.5018 | 0.5078 | 0.5136 | 0.5197 | 0.5254 | 0.5310 | 0.5368 | 0.5434 | 0.5502 |  |
| North-West                                           | 0.4676 | 0.4733 | 0.4789 | 0.4849 | 0.4910 | 0.4965 | 0.5018 | 0.5067 | 0.5118 | 0.5171 | 0.5230 | 0.5289 | 0.5343 | 0.5395 | 0.5449 | 0.5499 | 0.5546 | 0.5595 | 0.5651 | 0.5707 |  |
| Northern Cape                                        | 0.4973 | 0.5023 | 0.5073 | 0.5125 | 0.5178 | 0.5226 | 0.5272 | 0.5314 | 0.5358 | 0.5403 | 0.5452 | 0.5502 | 0.5547 | 0.5590 | 0.5635 | 0.5677 | 0.5716 | 0.5756 | 0.5804 | 0.5852 |  |
| Western Cape                                         | 0.6213 | 0.6248 | 0.6282 | 0.6318 | 0.6354 | 0.6386 | 0.6417 | 0.6444 | 0.6472 | 0.6502 | 0.6535 | 0.6567 | 0.6597 | 0.6624 | 0.6653 | 0.6677 | 0.6700 | 0.6724 | 0.6753 | 0.6785 |  |
| Western Sub-Saharan Africa                           | 0.1971 | 0.2024 | 0.2079 | 0.2135 | 0.2195 | 0.2253 | 0.2311 | 0.2373 | 0.2432 | 0.2488 | 0.2540 | 0.2587 | 0.2634 | 0.2678 | 0.2717 | 0.2762 | 0.2790 | 0.2807 | 0.2825 | 0.2846 |  |
| Benin                                                | 0.1417 | 0.1448 | 0.1479 | 0.1511 | 0.1543 | 0.1569 | 0.1596 | 0.1623 | 0.1650 | 0.1678 | 0.1711 | 0.1746 | 0.1782 | 0.1823 | 0.1868 | 0.1919 | 0.1970 | 0.2019 | 0.2070 | 0.2118 |  |
| Burkina Faso                                         | 0.0815 | 0.0832 | 0.0855 | 0.0876 | 0.0898 | 0.0918 | 0.0938 | 0.0959 | 0.0985 | 0.1011 | 0.1035 | 0.1057 | 0.1076 | 0.1093 | 0.1108 | 0.1128 | 0.1152 | 0.1173 | 0.1198 | 0.1226 |  |
| Cameroon                                             | 0.2195 | 0.2252 | 0.2311 | 0.2371 | 0.2433 | 0.2501 | 0.2564 | 0.2630 | 0.2701 | 0.2767 | 0.2827 | 0.2892 | 0.2958 | 0.3024 | 0.3091 | 0.3156 | 0.3218 | 0.3272 | 0.3320 | 0.3367 |  |
| Cape Verde                                           | 0.1902 | 0.1952 | 0.2000 | 0.2048 | 0.2097 | 0.2141 | 0.2187 | 0.2233 | 0.2286 | 0.2343 | 0.2411 | 0.2484 | 0.2557 | 0.2633 | 0.2710 | 0.2789 | 0.2867 | 0.2944 | 0.3021 | 0.3099 |  |
| Chad                                                 | 0.1344 | 0.1371 | 0.1396 | 0.1418 | 0.1442 | 0.1471 | 0.1499 | 0.1526 | 0.1553 | 0.1568 | 0.1580 | 0.1587 | 0.1595 | 0.1613 | 0.1633 | 0.1659 | 0.1688 | 0.1718 | 0.1754 | 0.1792 |  |
| Cote d'Ivoire                                        | 0.1788 | 0.1838 | 0.1888 | 0.1937 | 0.1987 | 0.2037 | 0.2089 | 0.2139 | 0.2186 | 0.2228 | 0.2248 | 0.2259 | 0.2271 | 0.2283 | 0.2297 | 0.2338 | 0.2408 | 0.2486 | 0.2575 | 0.2675 |  |
| The Gambia                                           | 0.1604 | 0.1641 | 0.1681 | 0.1723 | 0.1769 | 0.1816 | 0.1860 | 0.1907 | 0.1955 | 0.2004 | 0.2053 | 0.2100 | 0.2155 | 0.2211 | 0.2264 | 0.2317 | 0.2371 | 0.2421 | 0.2468 | 0.2513 |  |
| Ghana                                                | 0.2523 | 0.2596 | 0.2661 | 0.2727 | 0.2796 | 0.2854 | 0.2905 | 0.2956 | 0.3006 | 0.3049 | 0.3089 | 0.3126 | 0.3153 | 0.3173 | 0.3196 | 0.3226 | 0.3262 | 0.3304 | 0.3375 | 0.3468 |  |
| Guinea                                               | 0.1479 | 0.1506 | 0.1535 | 0.1565 | 0.1597 | 0.1631 | 0.1668 | 0.1703 | 0.1740 | 0.1775 | 0.1810 | 0.1843 | 0.1876 | 0.1908 | 0.1938 | 0.1970 | 0.2001 | 0.2032 | 0.2066 | 0.2101 |  |
| Guinea-Bissau                                        | 0.1409 | 0.1444 | 0.1480 | 0.1515 | 0.1551 | 0.1588 | 0.1627 | 0.1658 | 0.1695 | 0.1732 | 0.1761 | 0.1788 | 0.1818 | 0.1845 | 0.1874 | 0.1901 | 0.1933 | 0.1967 | 0.2003 | 0.2042 |  |
| Liberia                                              | 0.1643 | 0.1681 | 0.1718 | 0.1755 | 0.1791 | 0.1823 | 0.1857 | 0.1889 | 0.1922 | 0.1954 | 0.1983 | 0.2007 | 0.2031 | 0.2053 | 0.2073 | 0.2093 | 0.2112 | 0.2132 | 0.2157 | 0.2186 |  |
| Mali                                                 | 0.0913 | 0.0935 | 0.0956 | 0.0975 | 0.0993 | 0.1015 | 0.1040 | 0.1067 | 0.1091 | 0.1119 | 0.1143 | 0.1165 | 0.1184 | 0.1203 | 0.1220 | 0.1242 | 0.1265 | 0.1290 | 0.1315 | 0.1346 |  |
| Mauritania                                           | 0.2215 | 0.2270 | 0.2323 | 0.2373 | 0.2424 | 0.2476 | 0.2530 | 0.2584 | 0.2633 | 0.2685 | 0.2735 | 0.2786 | 0.2834 | 0.2882 | 0.2927 | 0.2973 | 0.3021 | 0.3069 | 0.3118 | 0.3169 |  |
| Niger                                                | 0.0988 | 0.1010 | 0.1030 | 0.1046 | 0.1064 | 0.1079 | 0.1097 | 0.1117 | 0.1137 | 0.1162 | 0.1186 | 0.1208 | 0.1232 | 0.1256 | 0.1271 | 0.1288 | 0.1310 | 0.1328 | 0.1346 | 0.1362 |  |
| Nigeria                                              | 0.2175 | 0.2239 | 0.2304 | 0.2373 | 0.2447 | 0.2519 | 0.2592 | 0.2671 | 0.2748 | 0.2822 | 0.2893 | 0.2960 | 0.3026 | 0.3088 | 0.3143 | 0.3202 | 0.3229 | 0.3233 | 0.3228 | 0.3222 |  |
| Sao Tome and Principe                                | 0.1842 | 0.1890 | 0.1939 | 0.1988 | 0.2038 | 0.2089 | 0.2140 | 0.2198 | 0.2254 | 0.2316 | 0.2372 | 0.2427 | 0.2484 | 0.2540 | 0.2592 | 0.2647 | 0.2699 | 0.2746 | 0.2792 | 0.2841 |  |
| Senegal                                              | 0.1645 | 0.1676 | 0.1709 | 0.1739 | 0.1770 | 0.1803 | 0.1837 | 0.1870 | 0.1901 | 0.1936 | 0.1968 | 0.2001 | 0.2039 | 0.2077 | 0.2115 | 0.2155 | 0.2201 | 0.2251 | 0.2302 | 0.2353 |  |
| Sierra Leone                                         | 0.1541 | 0.1578 | 0.1614 | 0.1649 | 0.1684 | 0.1717 | 0.1747 | 0.1776 | 0.1804 | 0.1833 | 0.1860 | 0.1889 | 0.1920 | 0.1949 | 0.1980 | 0.2008 | 0.2037 | 0.2069 | 0.2101 | 0.2136 |  |
| Togo                                                 | 0.1685 | 0.1727 | 0.1767 | 0.1804 | 0.1848 | 0.1886 | 0.1923 | 0.1962 | 0.2002 | 0.2041 | 0.2081 | 0.2119 | 0.2154 | 0.2184 | 0.2216 | 0.2248 | 0.2284 | 0.2316 | 0.2360 | 0.2416 |  |

Appendix Table SB. SDI Values by location, 1990-2016

| Location                                         | 1990   | 1991   | 1992   | 1993   | 1994   | 1995   | 1996   | 1997   | 1998   | 1999   | 2000   | 2001   | 2002   | 2003   | 2004   | 2005   | 2006   | 2007   | 2008   | 2009   | 2010   | 2011   | 2012   | 2013   | 2014   | 2015   | 2016   |
|--------------------------------------------------|--------|--------|--------|--------|--------|--------|--------|--------|--------|--------|--------|--------|--------|--------|--------|--------|--------|--------|--------|--------|--------|--------|--------|--------|--------|--------|--------|
| Global                                           | 0.5746 | 0.5804 | 0.5860 | 0.5911 | 0.5957 | 0.6003 | 0.6048 | 0.6093 | 0.6135 | 0.6176 | 0.6219 | 0.6263 | 0.6304 | 0.6345 | 0.6388 | 0.6432 | 0.6477 | 0.6524 | 0.6572 | 0.6616 | 0.6662 | 0.6710 | 0.6759 | 0.6809 | 0.6860 | 0.6913 | 0.6958 |
| Southeast Asia, East Asia, and Oceania           | 0.5209 | 0.5297 | 0.5387 | 0.5476 | 0.5563 | 0.5648 | 0.5730 | 0.5809 | 0.5874 | 0.5936 | 0.5999 | 0.6061 | 0.6125 | 0.6191 | 0.6261 | 0.6334 | 0.6414 | 0.6498 | 0.6580 | 0.6662 | 0.6745 | 0.6820 | 0.6908 | 0.6987 | 0.7058 | 0.7122 | 0.7185 |
| East Asia                                        | 0.5238 | 0.5331 | 0.5428 | 0.5524 | 0.5618 | 0.5710 | 0.5796 | 0.5875 | 0.5943 | 0.6010 | 0.6077 | 0.6144 | 0.6214 | 0.6286 | 0.6362 | 0.6441 | 0.6526 | 0.6614 | 0.6697 | 0.6778 | 0.6858 | 0.6938 | 0.7014 | 0.7086 | 0.7155 | 0.7221 | 0.7288 |
| China                                            | 0.5121 | 0.5214 | 0.5315 | 0.5416 | 0.5517 | 0.5616 | 0.5704 | 0.5782 | 0.5854 | 0.5925 | 0.5996 | 0.6067 | 0.6142 | 0.6218 | 0.6299 | 0.6382 | 0.6472 | 0.6565 | 0.6653 | 0.6738 | 0.6822 | 0.6905 | 0.6984 | 0.7059 | 0.7130 | 0.7198 | 0.7266 |
| North Korea                                      | 0.5047 | 0.5076 | 0.5096 | 0.5114 | 0.5099 | 0.5064 | 0.5013 | 0.4953 | 0.4892 | 0.4834 | 0.4780 | 0.4735 | 0.4703 | 0.4685 | 0.4682 | 0.4688 | 0.4700 | 0.4714 | 0.4729 | 0.4742 | 0.4760 | 0.4783 | 0.4811 | 0.4842 | 0.4875 | 0.4910 | 0.4936 |
| Taiwan (Province of China)                       | 0.7337 | 0.7425 | 0.7492 | 0.7556 | 0.7623 | 0.7684 | 0.7750 | 0.7880 | 0.7983 | 0.7998 | 0.8082 | 0.8151 | 0.8197 | 0.8242 | 0.8286 | 0.8330 | 0.8373 | 0.8417 | 0.8455 | 0.8488 | 0.8528 | 0.8568 | 0.8605 | 0.8641 | 0.8677 | 0.8713 | 0.8751 |
| Hong Kong Special Administrative Region of China | 0.7035 | 0.7084 | 0.7133 | 0.7181 | 0.7227 | 0.7267 | 0.7305 | 0.7344 | 0.7371 | 0.7397 | 0.7428 | 0.7459 | 0.7492 | 0.7525 | 0.7563 | 0.7607 | 0.7654 | 0.7704 | 0.7751 | 0.7789 | 0.7829 | 0.7870 | 0.7908 | 0.7945 | 0.7981 | 0.8014 | 0.8053 |
| Macao Special Administrative Region of China     | 0.7004 | 0.7054 | 0.7111 | 0.7164 | 0.7214 | 0.7251 | 0.7281 | 0.7306 | 0.7323 | 0.7337 | 0.7354 | 0.7383 | 0.7420 | 0.7468 | 0.7539 | 0.7609 | 0.7681 | 0.7761 | 0.7837 | 0.7890 | 0.7928 | 0.7961 | 0.7993 | 0.8024 | 0.8055 | 0.8085 | 0.8113 |
| China (without Hong Kong and Macao)              | 0.5058 | 0.5152 | 0.5254 | 0.5358 | 0.5461 | 0.5563 | 0.5654 | 0.5735 | 0.5810 | 0.5883 | 0.5956 | 0.6030 | 0.6107 | 0.6187 | 0.6269 | 0.6354 | 0.6446 | 0.6541 | 0.6630 | 0.6717 | 0.6803 | 0.6887 | 0.6967 | 0.7043 | 0.7115 | 0.7184 | 0.7253 |
| Anhui                                            | 0.4458 | 0.4547 | 0.4642 | 0.4738 | 0.4834 | 0.4929 | 0.5017 | 0.5101 | 0.5177 | 0.5249 | 0.5316 | 0.5381 | 0.5448 | 0.5517 | 0.5591 | 0.5670 | 0.5758 | 0.5851 | 0.5940 | 0.6029 | 0.6111 | 0.6187 | 0.6258 | 0.6326 | 0.6390 | 0.6451 | 0.6514 |
| Beijing                                          | 0.6707 | 0.6763 | 0.6824 | 0.6888 | 0.6955 | 0.7024 | 0.7090 | 0.7153 | 0.7209 | 0.7263 | 0.7317 | 0.7375 | 0.7436 | 0.7500 | 0.7568 | 0.7640 | 0.7717 | 0.7797 | 0.7873 | 0.7947 | 0.8020 | 0.8092 | 0.8162 | 0.8229 | 0.8292 | 0.8354 | 0.8415 |
| Chongqing                                        | 0.4740 | 0.4845 | 0.4957 | 0.5072 | 0.5189 | 0.5300 | 0.5393 | 0.5486 | 0.5571 | 0.5654 | 0.5736 | 0.5819 | 0.5906 | 0.5989 | 0.6073 | 0.6159 | 0.6250 | 0.6346 | 0.6434 | 0.6519 | 0.6602 | 0.6681 | 0.6755 | 0.6822 | 0.6885 | 0.6945 | 0.7004 |
| Fujian                                           | 0.4797 | 0.4917 | 0.5045 | 0.5177 | 0.5309 | 0.5439 | 0.5547 | 0.5642 | 0.5727 | 0.5812 | 0.5895 | 0.5977 | 0.6063 | 0.6148 | 0.6234 | 0.6324 | 0.6420 | 0.6523 | 0.6618 | 0.6711 | 0.6802 | 0.6892 | 0.6976 | 0.7055 | 0.7131 | 0.7203 | 0.7274 |
| Gansu                                            | 0.4384 | 0.4467 | 0.4556 | 0.4646 | 0.4734 | 0.4819 | 0.4901 | 0.4982 | 0.5058 | 0.5132 | 0.5201 | 0.5263 | 0.5327 | 0.5392 | 0.5459 | 0.5528 | 0.5602 | 0.5680 | 0.5754 | 0.5827 | 0.5899 | 0.5970 | 0.6036 | 0.6099 | 0.6159 | 0.6216 | 0.6276 |
| Guangdong                                        | 0.5364 | 0.5462 | 0.5567 | 0.5674 | 0.5780 | 0.5884 | 0.5980 | 0.6071 | 0.6154 | 0.6234 | 0.6317 | 0.6398 | 0.6484 | 0.6576 | 0.6673 | 0.6775 | 0.6884 | 0.6997 | 0.7103 | 0.7198 | 0.7286 | 0.7372 | 0.7454 | 0.7532 | 0.7606 | 0.7677 | 0.7747 |
| Guangxi                                          | 0.4585 | 0.4684 | 0.4790 | 0.4899 | 0.5007 | 0.5115 | 0.5214 | 0.5308 | 0.5391 | 0.5471 | 0.5546 | 0.5616 | 0.5690 | 0.5768 | 0.5849 | 0.5936 | 0.6030 | 0.6129 | 0.6222 | 0.6317 | 0.6415 | 0.6514 | 0.6609 | 0.6703 | 0.6790 | 0.6861 | 0.6933 |
| Guizhou                                          | 0.3760 | 0.3848 | 0.3940 | 0.4034 | 0.4128 | 0.4221 | 0.4306 | 0.4389 | 0.4465 | 0.4540 | 0.4616 | 0.4692 | 0.4773 | 0.4854 | 0.4939 | 0.5026 | 0.5120 | 0.5218 | 0.5310 | 0.5402 | 0.5495 | 0.5587 | 0.5673 | 0.5749 | 0.5812 | 0.5873 | 0.5937 |
| Hainan                                           | 0.5108 | 0.5198 | 0.5294 | 0.5391 | 0.5486 | 0.5578 | 0.5664 | 0.5748 | 0.5824 | 0.5898 | 0.5969 | 0.6037 | 0.6108 | 0.6177 | 0.6246 | 0.6319 | 0.6398 | 0.6483 | 0.6564 | 0.6647 | 0.6724 | 0.6795 | 0.6863 | 0.6928 | 0.6989 | 0.7048 | 0.7108 |
| Hebei                                            | 0.5087 | 0.5175 | 0.5270 | 0.5370 | 0.5469 | 0.5564 | 0.5649 | 0.5732 | 0.5809 | 0.5883 | 0.5958 | 0.6033 | 0.6111 | 0.6189 | 0.6270 | 0.6353 | 0.6442 | 0.6536 | 0.6623 | 0.6708 | 0.6792 | 0.6874 | 0.6951 | 0.7024 | 0.7094 | 0.7159 | 0.7225 |
| Heilongjiang                                     | 0.5566 | 0.5656 | 0.5748 | 0.5816 | 0.5875 | 0.5936 | 0.5997 | 0.6058 | 0.6114 | 0.6171 | 0.6225 | 0.6280 | 0.6336 | 0.6388 | 0.6441 | 0.6494 | 0.6553 | 0.6616 | 0.6676 | 0.6735 | 0.6793 | 0.6850 | 0.6904 | 0.6954 | 0.7001 | 0.7045 | 0.7092 |
| Henan                                            | 0.4714 | 0.4805 | 0.4909 | 0.5020 | 0.5133 | 0.5247 | 0.5352 | 0.5454 | 0.5541 | 0.5622 | 0.5702 | 0.5784 | 0.5868 | 0.5953 | 0.6041 | 0.6132 | 0.6230 | 0.6332 | 0.6426 | 0.6518 | 0.6608 | 0.6695 | 0.6777 | 0.6854 | 0.6926 | 0.6994 | 0.7062 |
| Hubei                                            | 0.5039 | 0.5138 | 0.5243 | 0.5348 | 0.5450 | 0.5532 | 0.5612 | 0.5690 | 0.5761 | 0.5831 | 0.5900 | 0.5967 | 0.6036 | 0.6108 | 0.6184 | 0.6263 | 0.6346 | 0.6433 | 0.6514 | 0.6593 | 0.6669 | 0.6744 | 0.6815 | 0.6881 | 0.6943 | 0.7002 | 0.7063 |
| Hunan                                            | 0.4854 | 0.4949 | 0.5045 | 0.5157 | 0.5259 | 0.5360 | 0.5455 | 0.5545 | 0.5617 | 0.5687 | 0.5756 | 0.5825 | 0.5897 | 0.5971 | 0.6048 | 0.6129 | 0.6215 | 0.6305 | 0.6389 | 0.6470 | 0.6551 | 0.6630 | 0.6704 | 0.6781 | 0.6842 | 0.6905 | 0.6969 |
| Inner Mongolia                                   | 0.5118 | 0.5222 | 0.5336 | 0.5453 | 0.5563 | 0.5656 | 0.5748 | 0.5843 | 0.5930 | 0.6016 | 0.6099 | 0.6182 | 0.6266 | 0.6338 | 0.6408 | 0.6478 | 0.6556 | 0.6642 | 0.6722 | 0.6803 | 0.6882 | 0.6959 | 0.7031 | 0.7098 | 0.7161 | 0.7218 | 0.7276 |
| Jiangsu                                          | 0.5389 | 0.5484 | 0.5569 | 0.5649 | 0.5733 | 0.5823 | 0.5909 | 0.5992 | 0.6067 | 0.6141 | 0.6214 | 0.6292 | 0.6374 | 0.6458 | 0.6547 | 0.6639 | 0.6737 | 0.6838 | 0.6932 | 0.7023 | 0.7112 | 0.7199 | 0.7281 | 0.7359 | 0.7432 | 0.7502 | 0.7571 |
| Jiangxi                                          | 0.4485 | 0.4584 | 0.4689 | 0.4795 | 0.4898 | 0.4995 | 0.5088 | 0.5178 | 0.5261 | 0.5341 | 0.5419 | 0.5495 | 0.5572 | 0.5649 | 0.5727 | 0.5808 | 0.5896 | 0.5989 | 0.6068 | 0.6145 | 0.6221 | 0.6294 | 0.6364 | 0.6430 | 0.6493 | 0.6553 | 0.6616 |
| Jilin                                            | 0.5370 | 0.5467 | 0.5569 | 0.5640 | 0.5713 | 0.5789 | 0.5863 | 0.5936 | 0.6003 | 0.6069 | 0.6133 | 0.6198 | 0.6263 | 0.6327 | 0.6392 | 0.6459 | 0.6533 | 0.6611 | 0.6684 | 0.6755 | 0.6826 | 0.6895 | 0.6960 | 0.7021 | 0.7078 | 0.7132 | 0.7187 |
| Liaoning                                         | 0.5916 | 0.5966 | 0.6021 | 0.6081 | 0.6144 | 0.6209 | 0.6273 | 0.6336 | 0.6393 | 0.6450 | 0.6505 | 0.6562 | 0.6620 | 0.6678 | 0.6737 | 0.6798 | 0.6864 | 0.6935 | 0.7001 | 0.7065 | 0.7129 | 0.7191 | 0.7249 | 0.7305 | 0.7357 | 0.7406 | 0.7457 |
| Ningxia                                          | 0.4599 | 0.4693 | 0.4792 | 0.4890 | 0.4983 | 0.5072 | 0.5154 | 0.5233 | 0.5306 | 0.5377 | 0.5449 | 0.5517 | 0.5589 | 0.5664 | 0.5743 | 0.5827 | 0.5917 | 0.6011 | 0.6096 | 0.6171 | 0.6244 | 0.6317 | 0.6386 | 0.6453 | 0.6517 | 0.6578 | 0.6642 |
| Qinghai                                          | 0.4524 | 0.4625 | 0.4726 | 0.4823 | 0.4916 | 0.5005 | 0.5087 | 0.5165 | 0.5237 | 0.5307 | 0.5373 | 0.5436 | 0.5504 | 0.5575 | 0.5644 | 0.5712 | 0.5784 | 0.5859 | 0.5930 | 0.6000 | 0.6069 | 0.6138 | 0.6203 | 0.6266 | 0.6327 | 0.6387 | 0.6450 |
| Shaanxi                                          | 0.4803 | 0.4902 | 0.5007 | 0.5116 | 0.5224 | 0.5320 | 0.5404 | 0.5487 | 0.5563 | 0.5638 | 0.5711 | 0.5787 | 0.5866 | 0.5943 | 0.6021 | 0.6102 | 0.6189 | 0.6282 | 0.6368 | 0.6453 | 0.6537 | 0.6619 | 0.6696 | 0.6768 | 0.6836 | 0.6900 | 0.6964 |
| Shandong                                         | 0.5155 | 0.5248 | 0.5350 | 0.5440 | 0.5530 | 0.5627 | 0.5718 | 0.5806 | 0.5886 | 0.5963 | 0.6040 | 0.6118 | 0.6201 | 0.6288 | 0.6379 | 0.6474 | 0.6575 | 0.6679 | 0.6776 | 0.6868 | 0.6960 | 0.7049 | 0.7132 | 0.7211 | 0.7285 | 0.7356 | 0.7425 |
| Shanghai                                         | 0.6840 | 0.6887 | 0.6936 | 0.6986 | 0.7037 | 0.7090 | 0.7142 | 0.7189 | 0.7233 | 0.7275 | 0.7317 | 0.7364 | 0.7414 | 0.7468 | 0.7527 | 0.7589 | 0.7653 | 0.7720 | 0.7784 | 0.7846 | 0.7907 | 0.7969 | 0.8029 | 0.8088 | 0.8145 | 0.8201 | 0.8260 |
| Shanxi                                           | 0.5109 | 0.5203 | 0.5301 | 0.5401 | 0.5499 | 0.5594 | 0.5684 | 0.5771 | 0.5850 | 0.5927 | 0.5998 | 0.6067 | 0.6137 | 0.6206 | 0.6277 | 0.6349 | 0.6427 | 0.6510 | 0.6587 | 0.6662 | 0.6737 | 0.6810 | 0.6878 | 0.6943 | 0.7005 | 0.7063 | 0.7123 |
| Sichuan                                          | 0.4635 | 0.4724 | 0.4822 | 0.4923 | 0.5024 | 0.5114 | 0.5198 | 0.5278 | 0.5351 | 0.5421 | 0.5491 | 0.5560 | 0.5632 | 0.5711 | 0.5786 | 0.5885 | 0.5980 | 0.6077 | 0.6166 | 0.6252 | 0.6336 | 0.6419 | 0.6496 | 0.6568 | 0.6637 | 0.6702 | 0.6768 |
| Tianjin                                          | 0.6356 | 0.6410 | 0.6469 | 0.6531 | 0.6595 | 0.6662 | 0.6727 | 0.6790 | 0.6848 | 0.6904 | 0.6960 | 0.7022 | 0.7087 | 0.7153 | 0.7221 | 0.7293 | 0.7369 | 0.7450 | 0.7527 | 0.7603 | 0.7677 | 0.7751 | 0.7820 | 0.7887 | 0.7951 | 0.8011 | 0.8073 |
| Tibet                                            | 0.4060 | 0.4137 | 0.4216 | 0.4292 | 0.4366 | 0.4437 | 0.4503 | 0.4564 | 0.4622 | 0.4681 | 0.4744 | 0.4804 | 0.4874 | 0.4950 | 0.5031 | 0.5115 | 0.5187 | 0.5257 | 0.5322 | 0.5384 | 0.5445 | 0.5504 | 0.5558 | 0.5610 | 0.5661 | 0.5712 | 0.5769 |
| Xinjiang                                         | 0.4864 | 0.4988 | 0.5115 | 0.5241 | 0.5362 | 0.5475 | 0.5582 | 0.5686 | 0.5783 | 0.5881 | 0.5972 | 0.6057 | 0.6142 | 0.6218 | 0.6293 | 0.6362 | 0.6440 | 0.6524 | 0.6605 | 0.6680 | 0.6755 | 0.6828 | 0.6895 | 0.6959 | 0.7018 | 0.7074 | 0.7132 |
| Yunnan                                           | 0.4117 | 0.4217 | 0.4323 | 0.4430 | 0.4534 | 0.4637 | 0.4732 | 0.4825 | 0.4909 | 0.4992 | 0.5074 | 0.5152 | 0.5235 | 0.5319 | 0.5408 | 0.5500 | 0.5599 | 0.5702 | 0.5792 | 0.5874 | 0.     |        |        |        |        |        |        |

Appendix Table SB. SDI Values by location, 1990-2016

| Location                       | 1990   | 1991   | 1992   | 1993   | 1994   | 1995   | 1996   | 1997   | 1998   | 1999   | 2000   | 2001   | 2002   | 2003   | 2004   | 2005   | 2006   | 2007   | 2008   | 2009   | 2010     | 2011   | 2012   | 2013   | 2014   | 2015   | 2016   |
|--------------------------------|--------|--------|--------|--------|--------|--------|--------|--------|--------|--------|--------|--------|--------|--------|--------|--------|--------|--------|--------|--------|----------|--------|--------|--------|--------|--------|--------|
| Lampung                        | 0.4369 | 0.4443 | 0.4528 | 0.4603 | 0.4687 | 0.4785 | 0.4886 | 0.4983 | 0.5074 | 0.5163 | 0.5221 | 0.5269 | 0.5315 | 0.5360 | 0.5400 | 0.5441 | 0.5487 | 0.5551 | 0.5623 | 0.5711 | 0.5813   | 0.5922 | 0.6027 | 0.6131 | 0.6231 | 0.6327 | 0.6411 |
| Bangka Belitung                | 0.4915 | 0.4995 | 0.5075 | 0.5143 | 0.5210 | 0.5278 | 0.5348 | 0.5420 | 0.5475 | 0.5530 | 0.5569 | 0.5615 | 0.5667 | 0.5723 | 0.5780 | 0.5838 | 0.5894 | 0.5952 | 0.6016 | 0.6083 | 0.6152   | 0.6228 | 0.6307 | 0.6390 | 0.6474 | 0.6558 | 0.6632 |
| Kepulauan Riau                 | 0.5808 | 0.5934 | 0.6058 | 0.6168 | 0.6264 | 0.6351 | 0.6440 | 0.6528 | 0.6592 | 0.6646 | 0.6686 | 0.6719 | 0.6747 | 0.6775 | 0.6808 | 0.6841 | 0.6878 | 0.6924 | 0.6978 | 0.7042 | 0.7111   | 0.7183 | 0.7262 | 0.7343 | 0.7424 | 0.7507 | 0.7579 |
| Kalimantan Utara               | 0.5884 | 0.5993 | 0.6104 | 0.6202 | 0.6299 | 0.6395 | 0.6491 | 0.6577 | 0.6661 | 0.6725 | 0.6788 | 0.6843 | 0.6888 | 0.6933 | 0.6980 | 0.7036 | 0.7087 | 0.7131 | 0.7201 | 0.7258 | 0.7314   | 0.7386 | 0.7459 | 0.7536 | 0.7614 | 0.7690 | 0.7754 |
| Jakarta                        | 0.6545 | 0.6626 | 0.6699 | 0.6800 | 0.6889 | 0.6973 | 0.7057 | 0.7142 | 0.7196 | 0.7246 | 0.7298 | 0.7350 | 0.7400 | 0.7450 | 0.7498 | 0.7543 | 0.7590 | 0.7639 | 0.7693 | 0.7753 | 0.7817   | 0.7885 | 0.7955 | 0.8028 | 0.8102 | 0.8177 | 0.8243 |
| Jawa Barat                     | 0.4959 | 0.5040 | 0.5121 | 0.5203 | 0.5290 | 0.5376 | 0.5462 | 0.5543 | 0.5596 | 0.5633 | 0.5663 | 0.5689 | 0.5715 | 0.5746 | 0.5777 | 0.5819 | 0.5873 | 0.5932 | 0.6001 | 0.6075 | 0.6153   | 0.6232 | 0.6311 | 0.6393 | 0.6475 | 0.6556 | 0.6627 |
| Jawa Tengah                    | 0.4574 | 0.4662 | 0.4757 | 0.4835 | 0.4915 | 0.4999 | 0.5081 | 0.5162 | 0.5211 | 0.5260 | 0.5292 | 0.5327 | 0.5363 | 0.5404 | 0.5446 | 0.5492 | 0.5549 | 0.5608 | 0.5675 | 0.5747 | 0.5824   | 0.5906 | 0.5990 | 0.6076 | 0.6162 | 0.6246 | 0.6320 |
| Yogyakarta                     | 0.4990 | 0.5084 | 0.5174 | 0.5304 | 0.5429 | 0.5537 | 0.5635 | 0.5719 | 0.5761 | 0.5804 | 0.5837 | 0.5873 | 0.5912 | 0.5949 | 0.5989 | 0.6026 | 0.6071 | 0.6122 | 0.6179 | 0.6243 | 0.6312   | 0.6388 | 0.6466 | 0.6549 | 0.6634 | 0.6717 | 0.6793 |
| Jawa Timur                     | 0.4818 | 0.4902 | 0.4982 | 0.5060 | 0.5138 | 0.5216 | 0.5298 | 0.5382 | 0.5446 | 0.5503 | 0.5561 | 0.5619 | 0.5675 | 0.5730 | 0.5786 | 0.5840 | 0.5899 | 0.5962 | 0.6026 | 0.6095 | 0.6170   | 0.6250 | 0.6334 | 0.6421 | 0.6508 | 0.6595 | 0.6671 |
| Banten                         | 0.4952 | 0.5041 | 0.5131 | 0.5210 | 0.5287 | 0.5364 | 0.5444 | 0.5532 | 0.5606 | 0.5678 | 0.5727 | 0.5769 | 0.5813 | 0.5855 | 0.5896 | 0.5934 | 0.5976 | 0.6021 | 0.6069 | 0.6124 | 0.6182   | 0.6264 | 0.6349 | 0.6436 | 0.6523 | 0.6609 | 0.6686 |
| Bali                           | 0.5059 | 0.5154 | 0.5243 | 0.5343 | 0.5437 | 0.5524 | 0.5611 | 0.5695 | 0.5747 | 0.5788 | 0.5819 | 0.5861 | 0.5888 | 0.5924 | 0.5963 | 0.6003 | 0.6043 | 0.6089 | 0.6143 | 0.6209 | 0.6280   | 0.6357 | 0.6442 | 0.6530 | 0.6616 | 0.6701 | 0.6776 |
| Nusa Tenggara Barat            | 0.3744 | 0.3827 | 0.3922 | 0.4027 | 0.4133 | 0.4240 | 0.4343 | 0.4437 | 0.4517 | 0.4582 | 0.4660 | 0.4750 | 0.4832 | 0.4900 | 0.4979 | 0.5049 | 0.5112 | 0.5183 | 0.5239 | 0.5319 | 0.5389   | 0.5468 | 0.5540 | 0.5617 | 0.5694 | 0.5772 | 0.5841 |
| Nusa Tenggara Timur            | 0.3805 | 0.3878 | 0.3952 | 0.4021 | 0.4087 | 0.4146 | 0.4201 | 0.4263 | 0.4268 | 0.4270 | 0.4289 | 0.4320 | 0.4356 | 0.4393 | 0.4434 | 0.4471 | 0.4512 | 0.4565 | 0.4628 | 0.4702 | 0.4786   | 0.4878 | 0.4972 | 0.5067 | 0.5161 | 0.5254 | 0.5336 |
| Kalimantan Barat               | 0.4287 | 0.4393 | 0.4499 | 0.4611 | 0.4723 | 0.4832 | 0.4940 | 0.5051 | 0.5130 | 0.5199 | 0.5252 | 0.5298 | 0.5342 | 0.5382 | 0.5424 | 0.5462 | 0.5500 | 0.5545 | 0.5593 | 0.5649 | 0.5712   | 0.5781 | 0.5857 | 0.5938 | 0.6020 | 0.6102 | 0.6175 |
| Kalimantan Tengah              | 0.5057 | 0.5145 | 0.5233 | 0.5342 | 0.5445 | 0.5541 | 0.5638 | 0.5728 | 0.5787 | 0.5832 | 0.5853 | 0.5861 | 0.5869 | 0.5877 | 0.5896 | 0.5915 | 0.5942 | 0.5982 | 0.6033 | 0.6096 | 0.6166   | 0.6246 | 0.6331 | 0.6418 | 0.6504 | 0.6590 | 0.6665 |
| Kalimantan Selatan             | 0.4945 | 0.5025 | 0.5101 | 0.5186 | 0.5266 | 0.5343 | 0.5421 | 0.5490 | 0.5535 | 0.5580 | 0.5610 | 0.5635 | 0.5667 | 0.5702 | 0.5738 | 0.5771 | 0.5803 | 0.5842 | 0.5888 | 0.5944 | 0.6010   | 0.6086 | 0.6165 | 0.6249 | 0.6334 | 0.6418 | 0.6493 |
| Kalimantan Timur               | 0.5977 | 0.6075 | 0.6168 | 0.6246 | 0.6324 | 0.6398 | 0.6471 | 0.6539 | 0.6609 | 0.6667 | 0.6733 | 0.6800 | 0.6856 | 0.6907 | 0.6959 | 0.7016 | 0.7067 | 0.7142 | 0.7169 | 0.7217 | 0.7263   | 0.7326 | 0.7394 | 0.7470 | 0.7549 | 0.7630 | 0.7700 |
| Sulawesi Utara                 | 0.5244 | 0.5318 | 0.5389 | 0.5477 | 0.5559 | 0.5639 | 0.5729 | 0.5811 | 0.5879 | 0.5908 | 0.5930 | 0.5946 | 0.5959 | 0.5972 | 0.5988 | 0.6009 | 0.6034 | 0.6071 | 0.6120 | 0.6187 | 0.6259   | 0.6337 | 0.6419 | 0.6505 | 0.6591 | 0.6675 | 0.6750 |
| Sulawesi Tengah                | 0.4524 | 0.4601 | 0.4675 | 0.4761 | 0.4848 | 0.4931 | 0.5016 | 0.5090 | 0.5165 | 0.5227 | 0.5274 | 0.5326 | 0.5377 | 0.5424 | 0.5469 | 0.5510 | 0.5548 | 0.5594 | 0.5651 | 0.5717 | 0.5786   | 0.5876 | 0.5970 | 0.6064 | 0.6157 | 0.6249 | 0.6329 |
| Sulawesi Selatan               | 0.4558 | 0.4648 | 0.4736 | 0.4815 | 0.4891 | 0.4965 | 0.5037 | 0.5104 | 0.5158 | 0.5204 | 0.5251 | 0.5302 | 0.5353 | 0.5403 | 0.5457 | 0.5498 | 0.5545 | 0.5598 | 0.5664 | 0.5744 | 0.5835   | 0.5932 | 0.6033 | 0.6133 | 0.6229 | 0.6322 | 0.6403 |
| Sulawesi Tenggara              | 0.4324 | 0.4415 | 0.4501 | 0.4575 | 0.4649 | 0.4726 | 0.4804 | 0.4872 | 0.4938 | 0.4990 | 0.5033 | 0.5080 | 0.5133 | 0.5187 | 0.5245 | 0.5308 | 0.5373 | 0.5443 | 0.5523 | 0.5613 | 0.5702   | 0.5796 | 0.5891 | 0.5987 | 0.6081 | 0.6173 | 0.6253 |
| Gorontalo                      | 0.4068 | 0.4151 | 0.4236 | 0.4301 | 0.4367 | 0.4435 | 0.4504 | 0.4573 | 0.4617 | 0.4657 | 0.4672 | 0.4698 | 0.4734 | 0.4778 | 0.4825 | 0.4878 | 0.4934 | 0.4999 | 0.5075 | 0.5168 | 0.5263   | 0.5361 | 0.5458 | 0.5551 | 0.5642 | 0.5730 | 0.5808 |
| Sulawesi Barat                 | 0.4139 | 0.4221 | 0.4300 | 0.4361 | 0.4418 | 0.4472 | 0.4528 | 0.4583 | 0.4618 | 0.4656 | 0.4688 | 0.4728 | 0.4773 | 0.4814 | 0.4854 | 0.4891 | 0.4931 | 0.4985 | 0.5066 | 0.5156 | 0.5254   | 0.5362 | 0.5471 | 0.5579 | 0.5683 | 0.5785 | 0.5873 |
| Maluku                         | 0.5189 | 0.5256 | 0.5325 | 0.5389 | 0.5449 | 0.5506 | 0.5565 | 0.5624 | 0.5656 | 0.5668 | 0.5635 | 0.5587 | 0.5536 | 0.5481 | 0.5423 | 0.5362 | 0.5306 | 0.5273 | 0.5265 | 0.5291 | 0.5341   | 0.5413 | 0.5508 | 0.5610 | 0.5711 | 0.5809 | 0.5899 |
| Maluku Utara                   | 0.4577 | 0.4665 | 0.4758 | 0.4835 | 0.4909 | 0.4983 | 0.5060 | 0.5135 | 0.5184 | 0.5225 | 0.5241 | 0.5240 | 0.5228 | 0.5209 | 0.5183 | 0.5147 | 0.5108 | 0.5079 | 0.5072 | 0.5099 | 0.5151   | 0.5222 | 0.5313 | 0.5414 | 0.5516 | 0.5616 | 0.5708 |
| Papua Barat                    | 0.5246 | 0.5338 | 0.5428 | 0.5505 | 0.5579 | 0.5649 | 0.5716 | 0.5779 | 0.5817 | 0.5848 | 0.5869 | 0.5887 | 0.5902 | 0.5920 | 0.5940 | 0.5960 | 0.5981 | 0.6012 | 0.6070 | 0.6154 | 0.6261   | 0.6425 | 0.6574 | 0.6709 | 0.6833 | 0.6951 | 0.7057 |
| Papua                          | 0.5102 | 0.5162 | 0.5218 | 0.5286 | 0.5341 | 0.5401 | 0.5463 | 0.5517 | 0.5583 | 0.5623 | 0.5653 | 0.5688 | 0.5708 | 0.5729 | 0.5739 | 0.5775 | 0.5801 | 0.5826 | 0.5837 | 0.5854 | 0.5877   | 0.5891 | 0.5915 | 0.5952 | 0.5999 | 0.6053 | 0.6101 |
| Oceania                        | 0.3832 | 0.3882 | 0.3930 | 0.3978 | 0.4027 | 0.4073 | 0.4119 | 0.4161 | 0.4203 | 0.4245 | 0.4285 | 0.4325 | 0.4363 | 0.4399 | 0.4434 | 0.4469 | 0.4502 | 0.4537 | 0.4573 | 0.4609 | 0.4645   | 0.4682 | 0.4722 | 0.4762 | 0.4805 | 0.4851 | 0.4891 |
| Fiji                           | 0.5996 | 0.6065 | 0.6136 | 0.6203 | 0.6270 | 0.6336 | 0.6402 | 0.6462 | 0.6518 | 0.6579 | 0.6634 | 0.6687 | 0.6739 | 0.6788 | 0.6839 | 0.6887 | 0.6939 | 0.6988 | 0.7035 | 0.7078 | 0.7123   | 0.7165 | 0.7205 | 0.7248 | 0.7291 | 0.7328 | 0.7365 |
| Kiribati                       | 0.3074 | 0.3116 | 0.3155 | 0.3195 | 0.3239 | 0.3283 | 0.3332 | 0.3384 | 0.3445 | 0.3503 | 0.3569 | 0.3634 | 0.3698 | 0.3764 | 0.3827 | 0.3891 | 0.3947 | 0.4005 | 0.4061 | 0.4115 | 0.4165   | 0.4212 | 0.4261 | 0.4313 | 0.4366 | 0.4421 | 0.4462 |
| Marshall Islands               | 0.4655 | 0.4700 | 0.4731 | 0.4744 | 0.4747 | 0.4759 | 0.4768 | 0.4786 | 0.4820 | 0.4867 | 0.4924 | 0.4985 | 0.5045 | 0.5097 | 0.5141 | 0.5181 | 0.5221 | 0.5267 | 0.5314 | 0.5363 | 0.5415   | 0.5469 | 0.5528 | 0.5588 | 0.5647 | 0.5707 | 0.5752 |
| Federated States of Micronesia | 0.4342 | 0.4458 | 0.4559 | 0.4656 | 0.4747 | 0.4848 | 0.4947 | 0.5034 | 0.5122 | 0.5207 | 0.5299 | 0.5388 | 0.5470 | 0.5548 | 0.5615 | 0.5676 | 0.5734 | 0.5782 | 0.5823 | 0.5862 | 0.5903   | 0.5948 | 0.5993 | 0.6032 | 0.6066 | 0.6100 | 0.6125 |
| Papua New Guinea               | 0.2956 | 0.2999 | 0.3043 | 0.3098 | 0.3154 | 0.3202 | 0.3253 | 0.3297 | 0.3338 | 0.3380 | 0.3417 | 0.3452 | 0.3484 | 0.3517 | 0.3550 | 0.3586 | 0.3623 | 0.3666 | 0.3713 | 0.3763 | 0.3815   | 0.3875 | 0.3936 | 0.3997 | 0.4060 | 0.4126 | 0.4184 |
| Samoa                          | 0.4509 | 0.4584 | 0.4654 | 0.4720 | 0.4771 | 0.4819 | 0.4872 | 0.4925 | 0.4977 | 0.5015 | 0.5043 | 0.5074 | 0.5107 | 0.5141 | 0.5175 | 0.5213 | 0.5251 | 0.5291 | 0.5334 | 0.5368 | 0.5395   | 0.5424 | 0.5454 | 0.5483 | 0.5526 | 0.5582 | 0.5623 |
| Solomon Islands                | 0.3180 | 0.3232 | 0.3291 | 0.3347 | 0.3401 | 0.3461 | 0.3520 | 0.3575 | 0.3628 | 0.3678 | 0.3707 | 0.3726 | 0.3738 | 0.3753 | 0.3770 | 0.3794 | 0.3826 | 0.3871 | 0.3931 | 0.3984 | 0.4043   | 0.4113 | 0.4185 | 0.4255 | 0.4321 | 0.4387 | 0.4437 |
| Tonga                          | 0.4544 | 0.4607 | 0.4662 | 0.4713 | 0.4760 | 0.4809 | 0.4860 | 0.4909 | 0.4958 | 0.5009 | 0.5059 | 0.5111 | 0.5164 | 0.5216 | 0.5266 | 0.5316 | 0.5366 | 0.5412 | 0.5459 | 0.5506 | 0.5555   | 0.5606 | 0.5658 | 0.5708 | 0.5761 | 0.5815 | 0.5857 |
| Vanuatu                        | 0.3350 | 0.3412 | 0.3473 | 0.3528 | 0.3586 | 0.3642 | 0.3698 | 0.3756 | 0.3816 | 0.3874 | 0.3935 | 0.3994 | 0.4046 | 0.4099 | 0.4151 | 0.4202 | 0.4256 | 0.4311 | 0.4370 | 0.4429 | 0.4486   | 0.4543 | 0.4599 | 0.4653 | 0.4708 | 0.4758 | 0.4791 |
| American Samoa                 | 0.6168 | 0.6218 | 0.6265 | 0.6308 | 0.6349 | 0.6390 | 0.6433 | 0.6476 | 0.6518 | 0.6562 | 0.6608 | 0.6656 | 0.6708 | 0.6760 | 0.6812 | 0.6864 | 0.6915 | 0.6968 | 0.7022 | 0.7113 | 0.7164   | 0.7209 | 0.7259 | 0.7305 | 0.7349 | 0.7392 | 0.7420 |
| Guam                           | 0.7554 | 0.7606 | 0.7653 | 0.7697 | 0.7740 | 0.7781 | 0.7817 | 0.7852 | 0.7884 | 0.7913 | 0.7941 | 0.7965 | 0.7988 | 0.8006 | 0.8024 | 0.8042 | 0.8058 | 0.8073 | 0.8087 | 0.8102 | 0.8118</ |        |        |        |        |        |        |

Appendix Table SB. SDI Values by location, 1990-2016

| Location                 | 1990   | 1991   | 1992   | 1993   | 1994   | 1995   | 1996   | 1997   | 1998   | 1999   | 2000   | 2001   | 2002   | 2003   | 2004   | 2005   | 2006   | 2007   | 2008   | 2009   | 2010   | 2011   | 2012   | 2013   | 2014   | 2015   | 2016   |
|--------------------------|--------|--------|--------|--------|--------|--------|--------|--------|--------|--------|--------|--------|--------|--------|--------|--------|--------|--------|--------|--------|--------|--------|--------|--------|--------|--------|--------|
| Romania                  | 0.7307 | 0.7378 | 0.7384 | 0.7388 | 0.7398 | 0.7418 | 0.7444 | 0.7467 | 0.7488 | 0.7515 | 0.7546 | 0.7588 | 0.7637 | 0.7686 | 0.7743 | 0.7798 | 0.7864 | 0.7936 | 0.8015 | 0.8076 | 0.8127 | 0.8176 | 0.8222 | 0.8265 | 0.8301 | 0.8334 | 0.8379 |
| Serbia                   | 0.7005 | 0.7034 | 0.7037 | 0.7014 | 0.6988 | 0.6971 | 0.6985 | 0.7022 | 0.7067 | 0.7091 | 0.7115 | 0.7137 | 0.7173 | 0.7219 | 0.7278 | 0.7325 | 0.7374 | 0.7423 | 0.7475 | 0.7516 | 0.7551 | 0.7585 | 0.7615 | 0.7645 | 0.7668 | 0.7689 | 0.7709 |
| Slovakia                 | 0.7848 | 0.7882 | 0.7918 | 0.7974 | 0.8046 | 0.8100 | 0.8119 | 0.8142 | 0.8168 | 0.8192 | 0.8218 | 0.8247 | 0.8279 | 0.8312 | 0.8347 | 0.8385 | 0.8429 | 0.8483 | 0.8537 | 0.8576 | 0.8604 | 0.8651 | 0.8684 | 0.8714 | 0.8743 | 0.8771 | 0.8799 |
| Slovenia                 | 0.8133 | 0.8130 | 0.8124 | 0.8125 | 0.8133 | 0.8148 | 0.8170 | 0.8199 | 0.8231 | 0.8268 | 0.8309 | 0.8351 | 0.8393 | 0.8433 | 0.8474 | 0.8514 | 0.8556 | 0.8601 | 0.8629 | 0.8648 | 0.8668 | 0.8692 | 0.8715 | 0.8731 | 0.8742 | 0.8771 | 0.8807 |
| Eastern Europe           | 0.7674 | 0.7750 | 0.7816 | 0.7820 | 0.7799 | 0.7775 | 0.7742 | 0.7712 | 0.7681 | 0.7662 | 0.7663 | 0.7677 | 0.7702 | 0.7744 | 0.7798 | 0.7858 | 0.7924 | 0.7965 | 0.8064 | 0.8097 | 0.8134 | 0.8162 | 0.8188 | 0.8207 | 0.8233 | 0.8261 | 0.8290 |
| Belarus                  | 0.7382 | 0.7435 | 0.7477 | 0.7508 | 0.7517 | 0.7480 | 0.7445 | 0.7420 | 0.7407 | 0.7404 | 0.7414 | 0.7437 | 0.7472 | 0.7520 | 0.7580 | 0.7649 | 0.7724 | 0.7800 | 0.7883 | 0.7948 | 0.8002 | 0.8053 | 0.8098 | 0.8138 | 0.8181 | 0.8219 | 0.8257 |
| Estonia                  | 0.7986 | 0.8071 | 0.8125 | 0.8144 | 0.8126 | 0.8120 | 0.8117 | 0.8132 | 0.8157 | 0.8184 | 0.8224 | 0.8270 | 0.8321 | 0.8375 | 0.8431 | 0.8471 | 0.8500 | 0.8537 | 0.8585 | 0.8614 | 0.8660 | 0.8718 | 0.8766 | 0.8803 | 0.8828 | 0.8851 | 0.8874 |
| Latvia                   | 0.7828 | 0.7892 | 0.7928 | 0.7939 | 0.7900 | 0.7862 | 0.7831 | 0.7814 | 0.7813 | 0.7826 | 0.7853 | 0.7896 | 0.7952 | 0.8013 | 0.8078 | 0.8148 | 0.8224 | 0.8306 | 0.8371 | 0.8406 | 0.8433 | 0.8466 | 0.8501 | 0.8509 | 0.8507 | 0.8514 | 0.8532 |
| Lithuania                | 0.7916 | 0.7947 | 0.7998 | 0.8047 | 0.8051 | 0.8036 | 0.8013 | 0.8006 | 0.8013 | 0.8025 | 0.8051 | 0.8088 | 0.8136 | 0.8194 | 0.8255 | 0.8316 | 0.8378 | 0.8448 | 0.8512 | 0.8534 | 0.8559 | 0.8585 | 0.8618 | 0.8653 | 0.8685 | 0.8721 | 0.8762 |
| Moldova                  | 0.6465 | 0.6512 | 0.6525 | 0.6537 | 0.6523 | 0.6502 | 0.6469 | 0.6434 | 0.6373 | 0.6306 | 0.6257 | 0.6239 | 0.6254 | 0.6287 | 0.6339 | 0.6400 | 0.6464 | 0.6528 | 0.6599 | 0.6653 | 0.6712 | 0.6778 | 0.6832 | 0.6891 | 0.6947 | 0.6993 | 0.7034 |
| Russia                   | 0.7736 | 0.7823 | 0.7881 | 0.7874 | 0.7858 | 0.7837 | 0.7808 | 0.7781 | 0.7752 | 0.7735 | 0.7740 | 0.7754 | 0.7780 | 0.7820 | 0.7871 | 0.7929 | 0.7993 | 0.8061 | 0.8115 | 0.8145 | 0.8182 | 0.8211 | 0.8226 | 0.8238 | 0.8259 | 0.8286 | 0.8317 |
| Ukraine                  | 0.7481 | 0.7531 | 0.7572 | 0.7598 | 0.7579 | 0.7535 | 0.7481 | 0.7425 | 0.7369 | 0.7319 | 0.7287 | 0.7280 | 0.7293 | 0.7334 | 0.7400 | 0.7470 | 0.7546 | 0.7627 | 0.7702 | 0.7741 | 0.7779 | 0.7821 | 0.7854 | 0.7889 | 0.7911 | 0.7920 | 0.7927 |
| High-income              | 0.8126 | 0.8169 | 0.8216 | 0.8260 | 0.8301 | 0.8336 | 0.8368 | 0.8398 | 0.8425 | 0.8451 | 0.8482 | 0.8519 | 0.8544 | 0.8563 | 0.8587 | 0.8603 | 0.8612 | 0.8629 | 0.8656 | 0.8682 | 0.8706 | 0.8728 | 0.8751 | 0.8772 | 0.8789 | 0.8807 | 0.8823 |
| High-income Asia Pacific | 0.8047 | 0.8095 | 0.8155 | 0.8210 | 0.8260 | 0.8309 | 0.8350 | 0.8386 | 0.8414 | 0.8439 | 0.8466 | 0.8490 | 0.8514 | 0.8538 | 0.8563 | 0.8588 | 0.8614 | 0.8642 | 0.8666 | 0.8684 | 0.8706 | 0.8727 | 0.8749 | 0.8771 | 0.8793 | 0.8815 | 0.8838 |
| Brunei                   | 0.7444 | 0.7505 | 0.7559 | 0.7610 | 0.7661 | 0.7716 | 0.7772 | 0.7831 | 0.7892 | 0.7958 | 0.8025 | 0.8086 | 0.8148 | 0.8210 | 0.8272 | 0.8333 | 0.8389 | 0.8440 | 0.8486 | 0.8525 | 0.8559 | 0.8585 | 0.8608 | 0.8632 | 0.8657 | 0.8686 | 0.8710 |
| Japan                    | 0.8222 | 0.8278 | 0.8326 | 0.8366 | 0.8402 | 0.8437 | 0.8469 | 0.8499 | 0.8522 | 0.8541 | 0.8560 | 0.8578 | 0.8594 | 0.8611 | 0.8630 | 0.8648 | 0.8668 | 0.8689 | 0.8706 | 0.8718 | 0.8734 | 0.8749 | 0.8765 | 0.8783 | 0.8800 | 0.8817 | 0.8836 |
| South Korea              | 0.7384 | 0.7440 | 0.7534 | 0.7635 | 0.7720 | 0.7813 | 0.7911 | 0.7998 | 0.8047 | 0.8101 | 0.8156 | 0.8207 | 0.8261 | 0.8308 | 0.8355 | 0.8399 | 0.8446 | 0.8493 | 0.8534 | 0.8569 | 0.8608 | 0.8644 | 0.8679 | 0.8712 | 0.8740 | 0.8777 | 0.8814 |
| Singapore                | 0.7409 | 0.7481 | 0.7535 | 0.7604 | 0.7684 | 0.7759 | 0.7839 | 0.7948 | 0.8021 | 0.8045 | 0.8122 | 0.8183 | 0.8234 | 0.8284 | 0.8339 | 0.8401 | 0.8463 | 0.8524 | 0.8579 | 0.8630 | 0.8667 | 0.8693 | 0.8727 | 0.8761 | 0.8795 | 0.8827 | 0.8858 |
| Hokkaido                 | 0.8134 | 0.8180 | 0.8223 | 0.8261 | 0.8297 | 0.8330 | 0.8362 | 0.8391 | 0.8412 | 0.8431 | 0.8449 | 0.8466 | 0.8481 | 0.8498 | 0.8515 | 0.8533 | 0.8551 | 0.8570 | 0.8586 | 0.8596 | 0.8611 | 0.8624 | 0.8640 | 0.8655 | 0.8671 | 0.8687 | 0.8704 |
| Aomori                   | 0.8055 | 0.8097 | 0.8142 | 0.8178 | 0.8219 | 0.8268 | 0.8311 | 0.8350 | 0.8377 | 0.8397 | 0.8416 | 0.8433 | 0.8449 | 0.8465 | 0.8483 | 0.8500 | 0.8518 | 0.8537 | 0.8554 | 0.8563 | 0.8578 | 0.8592 | 0.8607 | 0.8623 | 0.8639 | 0.8655 | 0.8672 |
| Iwate                    | 0.7966 | 0.8015 | 0.8069 | 0.8112 | 0.8159 | 0.8213 | 0.8257 | 0.8297 | 0.8329 | 0.8353 | 0.8376 | 0.8403 | 0.8422 | 0.8439 | 0.8457 | 0.8475 | 0.8494 | 0.8514 | 0.8532 | 0.8542 | 0.8558 | 0.8572 | 0.8588 | 0.8604 | 0.8620 | 0.8637 | 0.8655 |
| Miyagi                   | 0.8127 | 0.8184 | 0.8243 | 0.8284 | 0.8321 | 0.8356 | 0.8389 | 0.8419 | 0.8442 | 0.8461 | 0.8480 | 0.8498 | 0.8514 | 0.8531 | 0.8549 | 0.8567 | 0.8585 | 0.8605 | 0.8622 | 0.8633 | 0.8648 | 0.8662 | 0.8678 | 0.8694 | 0.8710 | 0.8727 | 0.8744 |
| Akita                    | 0.8019 | 0.8064 | 0.8110 | 0.8145 | 0.8186 | 0.8235 | 0.8279 | 0.8320 | 0.8343 | 0.8362 | 0.8382 | 0.8399 | 0.8416 | 0.8432 | 0.8451 | 0.8469 | 0.8488 | 0.8507 | 0.8524 | 0.8535 | 0.8550 | 0.8564 | 0.8579 | 0.8595 | 0.8611 | 0.8628 | 0.8645 |
| Yamagata                 | 0.7933 | 0.7983 | 0.8034 | 0.8073 | 0.8117 | 0.8166 | 0.8210 | 0.8251 | 0.8285 | 0.8313 | 0.8338 | 0.8369 | 0.8401 | 0.8429 | 0.8448 | 0.8467 | 0.8487 | 0.8507 | 0.8525 | 0.8536 | 0.8552 | 0.8567 | 0.8583 | 0.8600 | 0.8616 | 0.8633 | 0.8652 |
| Fukushima                | 0.8008 | 0.8059 | 0.8112 | 0.8152 | 0.8196 | 0.8245 | 0.8287 | 0.8325 | 0.8358 | 0.8385 | 0.8410 | 0.8438 | 0.8469 | 0.8502 | 0.8533 | 0.8552 | 0.8567 | 0.8585 | 0.8603 | 0.8615 | 0.8627 | 0.8638 | 0.8647 | 0.8659 | 0.8678 | 0.8701 | 0.8725 |
| Ibaraki                  | 0.8165 | 0.8221 | 0.8279 | 0.8323 | 0.8371 | 0.8422 | 0.8460 | 0.8489 | 0.8511 | 0.8530 | 0.8549 | 0.8566 | 0.8582 | 0.8598 | 0.8616 | 0.8634 | 0.8652 | 0.8672 | 0.8689 | 0.8700 | 0.8715 | 0.8730 | 0.8745 | 0.8762 | 0.8778 | 0.8795 | 0.8813 |
| Tochigi                  | 0.8176 | 0.8234 | 0.8294 | 0.8340 | 0.8388 | 0.8440 | 0.8480 | 0.8509 | 0.8532 | 0.8552 | 0.8571 | 0.8589 | 0.8606 | 0.8623 | 0.8641 | 0.8660 | 0.8679 | 0.8699 | 0.8716 | 0.8727 | 0.8743 | 0.8757 | 0.8773 | 0.8790 | 0.8807 | 0.8824 | 0.8842 |
| Gunma                    | 0.8124 | 0.8178 | 0.8232 | 0.8273 | 0.8318 | 0.8368 | 0.8410 | 0.8449 | 0.8474 | 0.8494 | 0.8513 | 0.8531 | 0.8547 | 0.8564 | 0.8582 | 0.8601 | 0.8619 | 0.8639 | 0.8656 | 0.8667 | 0.8682 | 0.8697 | 0.8713 | 0.8730 | 0.8746 | 0.8763 | 0.8781 |
| Saitama                  | 0.8101 | 0.8152 | 0.8196 | 0.8235 | 0.8272 | 0.8307 | 0.8338 | 0.8366 | 0.8387 | 0.8404 | 0.8421 | 0.8437 | 0.8451 | 0.8466 | 0.8482 | 0.8498 | 0.8516 | 0.8535 | 0.8550 | 0.8560 | 0.8573 | 0.8586 | 0.8601 | 0.8616 | 0.8631 | 0.8646 | 0.8662 |
| Chiba                    | 0.8148 | 0.8196 | 0.8239 | 0.8279 | 0.8315 | 0.8350 | 0.8382 | 0.8409 | 0.8430 | 0.8448 | 0.8465 | 0.8481 | 0.8496 | 0.8511 | 0.8528 | 0.8545 | 0.8562 | 0.8581 | 0.8597 | 0.8606 | 0.8620 | 0.8634 | 0.8649 | 0.8664 | 0.8679 | 0.8695 | 0.8711 |
| Tokyo                    | 0.8622 | 0.8667 | 0.8708 | 0.8746 | 0.8780 | 0.8813 | 0.8846 | 0.8874 | 0.8897 | 0.8916 | 0.8935 | 0.8953 | 0.8970 | 0.8987 | 0.9006 | 0.9025 | 0.9045 | 0.9064 | 0.9079 | 0.9093 | 0.9108 | 0.9123 | 0.9138 | 0.9152 | 0.9167 | 0.9182 | 0.9198 |
| Kanagawa                 | 0.8214 | 0.8261 | 0.8304 | 0.8343 | 0.8379 | 0.8413 | 0.8444 | 0.8472 | 0.8493 | 0.8511 | 0.8529 | 0.8545 | 0.8560 | 0.8575 | 0.8592 | 0.8609 | 0.8627 | 0.8646 | 0.8662 | 0.8672 | 0.8686 | 0.8699 | 0.8714 | 0.8730 | 0.8745 | 0.8761 | 0.8778 |
| Niigata                  | 0.8053 | 0.8107 | 0.8163 | 0.8206 | 0.8252 | 0.8305 | 0.8350 | 0.8392 | 0.8429 | 0.8453 | 0.8473 | 0.8491 | 0.8508 | 0.8526 | 0.8544 | 0.8563 | 0.8583 | 0.8603 | 0.8621 | 0.8633 | 0.8649 | 0.8664 | 0.8680 | 0.8698 | 0.8714 | 0.8732 | 0.8750 |
| Toyama                   | 0.8171 | 0.8227 | 0.8282 | 0.8322 | 0.8364 | 0.8403 | 0.8437 | 0.8467 | 0.8491 | 0.8511 | 0.8531 | 0.8549 | 0.8566 | 0.8583 | 0.8602 | 0.8621 | 0.8640 | 0.8661 | 0.8678 | 0.8690 | 0.8706 | 0.8721 | 0.8738 | 0.8755 | 0.8772 | 0.8790 | 0.8808 |
| Ishikawa                 | 0.8146 | 0.8205 | 0.8263 | 0.8309 | 0.8356 | 0.8396 | 0.8430 | 0.8460 | 0.8483 | 0.8503 | 0.8523 | 0.8540 | 0.8557 | 0.8573 | 0.8592 | 0.8610 | 0.8629 | 0.8650 | 0.8667 | 0.8678 | 0.8694 | 0.8709 | 0.8725 | 0.8743 | 0.8759 | 0.8777 | 0.8795 |
| Fukui                    | 0.8099 | 0.8154 | 0.8208 | 0.8248 | 0.8291 | 0.8341 | 0.8383 | 0.8423 | 0.8458 | 0.8486 | 0.8512 | 0.8541 | 0.8570 | 0.8592 | 0.8611 | 0.8630 | 0.8640 | 0.8648 | 0.8659 | 0.8665 | 0.8674 | 0.8685 | 0.8694 | 0.8708 | 0.8730 | 0.8757 | 0.8784 |
| Yamanashi                | 0.8076 | 0.8126 | 0.8178 | 0.8219 | 0.8266 | 0.8320 | 0.8366 | 0.8408 | 0.8443 | 0.8463 | 0.8482 | 0.8500 | 0.8517 | 0.8534 | 0.8552 | 0.8571 | 0.8590 | 0.8609 | 0.8627 | 0.8638 | 0.8653 | 0.8668 | 0.8684 | 0.8701 | 0.8718 | 0.8735 | 0.8754 |
| Nagano                   | 0.8050 | 0.8103 | 0.8159 | 0.8201 | 0.8247 | 0.8298 | 0.8341 | 0.8380 | 0.8414 | 0.8441 | 0.8466 | 0.8493 | 0.8519 | 0.8537 | 0.8555 | 0.8574 | 0.8593 | 0.8613 | 0.8631 | 0.8642 | 0.8658 | 0.8671 | 0.8681 | 0.8693 | 0.8713 | 0.8737 | 0.8759 |
| Gifu                     | 0.8112 | 0.8168 | 0.8223 | 0.8265 | 0.8308 | 0.8345 | 0.8378 | 0.8408 | 0.8431 | 0.8450 | 0.8469 | 0.8486 | 0.8503 | 0.8519 | 0.8537 | 0.8556 | 0.8574 | 0.8594 | 0.8611 | 0.8622 | 0.8637 | 0.8651 | 0.     |        |        |        |        |

Appendix Table SB. SDI Values by location, 1990-2016

| Location                | 1990   | 1991   | 1992   | 1993   | 1994   | 1995   | 1996   | 1997   | 1998   | 1999   | 2000   | 2001   | 2002   | 2003   | 2004   | 2005   | 2006   | 2007   | 2008   | 2009   | 2010   | 2011   | 2012   | 2013   | 2014   | 2015   | 2016   |
|-------------------------|--------|--------|--------|--------|--------|--------|--------|--------|--------|--------|--------|--------|--------|--------|--------|--------|--------|--------|--------|--------|--------|--------|--------|--------|--------|--------|--------|
| Oita                    | 0.8065 | 0.8116 | 0.8168 | 0.8207 | 0.8249 | 0.8297 | 0.8338 | 0.8376 | 0.8409 | 0.8430 | 0.8450 | 0.8468 | 0.8486 | 0.8504 | 0.8523 | 0.8543 | 0.8563 | 0.8584 | 0.8596 | 0.8602 | 0.8612 | 0.8623 | 0.8633 | 0.8647 | 0.8669 | 0.8696 | 0.8723 |
| Miyazaki                | 0.7947 | 0.7995 | 0.8043 | 0.8078 | 0.8118 | 0.8165 | 0.8206 | 0.8246 | 0.8281 | 0.8307 | 0.8331 | 0.8358 | 0.8386 | 0.8413 | 0.8440 | 0.8451 | 0.8465 | 0.8468 | 0.8475 | 0.8482 | 0.8486 | 0.8491 | 0.8493 | 0.8494 | 0.8495 | 0.8496 | 0.8497 |
| Kagoshima               | 0.7933 | 0.7985 | 0.8039 | 0.8080 | 0.8126 | 0.8177 | 0.8221 | 0.8262 | 0.8297 | 0.8322 | 0.8345 | 0.8370 | 0.8397 | 0.8419 | 0.8439 | 0.8459 | 0.8464 | 0.8472 | 0.8482 | 0.8487 | 0.8496 | 0.8506 | 0.8517 | 0.8531 | 0.8554 | 0.8582 | 0.8611 |
| Okinawa                 | 0.7821 | 0.7874 | 0.7931 | 0.7974 | 0.8023 | 0.8078 | 0.8121 | 0.8158 | 0.8187 | 0.8208 | 0.8227 | 0.8254 | 0.8284 | 0.8316 | 0.8347 | 0.8361 | 0.8360 | 0.8366 | 0.8372 | 0.8370 | 0.8373 | 0.8378 | 0.8385 | 0.8397 | 0.8420 | 0.8451 | 0.8481 |
| Australasia             | 0.8154 | 0.8183 | 0.8208 | 0.8242 | 0.8279 | 0.8317 | 0.8355 | 0.8394 | 0.8427 | 0.8458 | 0.8493 | 0.8527 | 0.8556 | 0.8580 | 0.8607 | 0.8617 | 0.8612 | 0.8610 | 0.8637 | 0.8674 | 0.8703 | 0.8722 | 0.8751 | 0.8797 | 0.8838 | 0.8866 | 0.8886 |
| Australia               | 0.8177 | 0.8203 | 0.8228 | 0.8263 | 0.8300 | 0.8340 | 0.8380 | 0.8419 | 0.8455 | 0.8490 | 0.8527 | 0.8559 | 0.8587 | 0.8615 | 0.8638 | 0.8652 | 0.8652 | 0.8653 | 0.8679 | 0.8717 | 0.8745 | 0.8760 | 0.8785 | 0.8831 | 0.8874 | 0.8904 | 0.8924 |
| New Zealand             | 0.8031 | 0.8071 | 0.8096 | 0.8130 | 0.8163 | 0.8191 | 0.8221 | 0.8259 | 0.8278 | 0.8283 | 0.8309 | 0.8357 | 0.8390 | 0.8396 | 0.8414 | 0.8430 | 0.8402 | 0.8383 | 0.8415 | 0.8442 | 0.8471 | 0.8511 | 0.8556 | 0.8604 | 0.8632 | 0.8651 | 0.8668 |
| Western Europe          | 0.8013 | 0.8067 | 0.8124 | 0.8172 | 0.8209 | 0.8245 | 0.8280 | 0.8316 | 0.8351 | 0.8381 | 0.8416 | 0.8453 | 0.8480 | 0.8499 | 0.8522 | 0.8542 | 0.8559 | 0.8575 | 0.8594 | 0.8613 | 0.8636 | 0.8664 | 0.8691 | 0.8714 | 0.8728 | 0.8743 | 0.8761 |
| Andorra                 | 0.8680 | 0.8700 | 0.8718 | 0.8731 | 0.8745 | 0.8760 | 0.8779 | 0.8807 | 0.8838 | 0.8869 | 0.8888 | 0.8906 | 0.8923 | 0.8941 | 0.8958 | 0.8975 | 0.8991 | 0.9008 | 0.9024 | 0.9040 | 0.9055 | 0.9071 | 0.9086 | 0.9101 | 0.9116 | 0.9131 | 0.9148 |
| Austria                 | 0.8298 | 0.8324 | 0.8355 | 0.8384 | 0.8410 | 0.8436 | 0.8462 | 0.8487 | 0.8514 | 0.8541 | 0.8570 | 0.8596 | 0.8622 | 0.8645 | 0.8668 | 0.8691 | 0.8714 | 0.8739 | 0.8764 | 0.8782 | 0.8802 | 0.8823 | 0.8845 | 0.8866 | 0.8886 | 0.8904 | 0.8922 |
| Belgium                 | 0.8432 | 0.8459 | 0.8503 | 0.8551 | 0.8589 | 0.8609 | 0.8625 | 0.8651 | 0.8674 | 0.8687 | 0.8705 | 0.8737 | 0.8765 | 0.8772 | 0.8773 | 0.8777 | 0.8785 | 0.8798 | 0.8815 | 0.8834 | 0.8862 | 0.8896 | 0.8930 | 0.8956 | 0.8969 | 0.8978 | 0.8988 |
| Cyprus                  | 0.7450 | 0.7476 | 0.7542 | 0.7651 | 0.7741 | 0.7827 | 0.7902 | 0.7981 | 0.8059 | 0.8124 | 0.8190 | 0.8260 | 0.8314 | 0.8349 | 0.8392 | 0.8432 | 0.8474 | 0.8517 | 0.8561 | 0.8596 | 0.8628 | 0.8655 | 0.8676 | 0.8688 | 0.8697 | 0.8707 | 0.8718 |
| Denmark                 | 0.8796 | 0.8796 | 0.8802 | 0.8808 | 0.8818 | 0.8854 | 0.8892 | 0.8925 | 0.8954 | 0.8970 | 0.8995 | 0.9031 | 0.9050 | 0.9052 | 0.9057 | 0.9059 | 0.9067 | 0.9076 | 0.9093 | 0.9108 | 0.9142 | 0.9190 | 0.9223 | 0.9246 | 0.9253 | 0.9252 | 0.9253 |
| Finland                 | 0.8408 | 0.8413 | 0.8421 | 0.8431 | 0.8449 | 0.8486 | 0.8523 | 0.8564 | 0.8600 | 0.8630 | 0.8672 | 0.8714 | 0.8742 | 0.8758 | 0.8780 | 0.8802 | 0.8827 | 0.8857 | 0.8881 | 0.8896 | 0.8924 | 0.8962 | 0.9001 | 0.9039 | 0.9062 | 0.9068 | 0.9071 |
| France                  | 0.7986 | 0.8046 | 0.8117 | 0.8174 | 0.8205 | 0.8229 | 0.8262 | 0.8295 | 0.8319 | 0.8333 | 0.8355 | 0.8396 | 0.8435 | 0.8459 | 0.8477 | 0.8487 | 0.8505 | 0.8531 | 0.8549 | 0.8562 | 0.8581 | 0.8607 | 0.8631 | 0.8653 | 0.8665 | 0.8675 | 0.8688 |
| Germany                 | 0.8288 | 0.8322 | 0.8354 | 0.8381 | 0.8406 | 0.8431 | 0.8453 | 0.8475 | 0.8497 | 0.8519 | 0.8542 | 0.8565 | 0.8586 | 0.8605 | 0.8623 | 0.8641 | 0.8662 | 0.8687 | 0.8711 | 0.8727 | 0.8748 | 0.8772 | 0.8796 | 0.8819 | 0.8842 | 0.8865 | 0.8887 |
| Greece                  | 0.7651 | 0.7699 | 0.7745 | 0.7788 | 0.7831 | 0.7874 | 0.7918 | 0.7964 | 0.8011 | 0.8057 | 0.8103 | 0.8150 | 0.8199 | 0.8246 | 0.8293 | 0.8337 | 0.8383 | 0.8428 | 0.8466 | 0.8499 | 0.8520 | 0.8526 | 0.8526 | 0.8524 | 0.8524 | 0.8525 | 0.8532 |
| Iceland                 | 0.8471 | 0.8517 | 0.8522 | 0.8554 | 0.8605 | 0.8622 | 0.8645 | 0.8686 | 0.8725 | 0.8748 | 0.8793 | 0.8864 | 0.8884 | 0.8879 | 0.8893 | 0.8916 | 0.8938 | 0.8953 | 0.8942 | 0.8944 | 0.9011 | 0.9064 | 0.9094 | 0.9144 | 0.9176 | 0.9199 | 0.9213 |
| Ireland                 | 0.7679 | 0.7753 | 0.7840 | 0.7917 | 0.7977 | 0.8023 | 0.8060 | 0.8110 | 0.8183 | 0.8262 | 0.8319 | 0.8365 | 0.8420 | 0.8481 | 0.8555 | 0.8605 | 0.8609 | 0.8610 | 0.8626 | 0.8642 | 0.8669 | 0.8705 | 0.8737 | 0.8768 | 0.8795 | 0.8826 | 0.8855 |
| Israel                  | 0.7362 | 0.7427 | 0.7484 | 0.7527 | 0.7570 | 0.7608 | 0.7637 | 0.7655 | 0.7668 | 0.7689 | 0.7723 | 0.7754 | 0.7765 | 0.7768 | 0.7816 | 0.7815 | 0.7843 | 0.7856 | 0.7859 | 0.7878 | 0.7910 | 0.7939 | 0.7957 | 0.7979 | 0.7990 | 0.7993 | 0.8010 |
| Italy                   | 0.7983 | 0.8027 | 0.8069 | 0.8105 | 0.8141 | 0.8176 | 0.8210 | 0.8243 | 0.8277 | 0.8309 | 0.8343 | 0.8375 | 0.8404 | 0.8431 | 0.8457 | 0.8480 | 0.8503 | 0.8527 | 0.8551 | 0.8567 | 0.8584 | 0.8601 | 0.8617 | 0.8630 | 0.8642 | 0.8655 | 0.8669 |
| Luxembourg              | 0.8761 | 0.8797 | 0.8817 | 0.8845 | 0.8883 | 0.8905 | 0.8932 | 0.8979 | 0.9004 | 0.9005 | 0.9038 | 0.9091 | 0.9117 | 0.9124 | 0.9133 | 0.9148 | 0.9167 | 0.9192 | 0.9210 | 0.9215 | 0.9244 | 0.9276 | 0.9289 | 0.9318 | 0.9343 | 0.9355 | 0.9358 |
| Malta                   | 0.7519 | 0.7543 | 0.7588 | 0.7678 | 0.7755 | 0.7767 | 0.7776 | 0.7860 | 0.7953 | 0.8029 | 0.8140 | 0.8188 | 0.8220 | 0.8247 | 0.8269 | 0.8291 | 0.8313 | 0.8338 | 0.8363 | 0.8382 | 0.8404 | 0.8425 | 0.8450 | 0.8476 | 0.8498 | 0.8529 | 0.8563 |
| Netherlands             | 0.8499 | 0.8542 | 0.8586 | 0.8623 | 0.8664 | 0.8706 | 0.8732 | 0.8744 | 0.8760 | 0.8777 | 0.8804 | 0.8840 | 0.8864 | 0.8893 | 0.8929 | 0.8956 | 0.8980 | 0.8995 | 0.9005 | 0.9020 | 0.9048 | 0.9088 | 0.9126 | 0.9153 | 0.9165 | 0.9173 | 0.9181 |
| Norway                  | 0.8473 | 0.8513 | 0.8556 | 0.8589 | 0.8616 | 0.8641 | 0.8680 | 0.8737 | 0.8775 | 0.8799 | 0.8851 | 0.8910 | 0.8937 | 0.8945 | 0.8962 | 0.8973 | 0.8986 | 0.9001 | 0.9008 | 0.9030 | 0.9075 | 0.9118 | 0.9163 | 0.9200 | 0.9218 | 0.9222 | 0.9224 |
| Portugal                | 0.6868 | 0.6939 | 0.7013 | 0.7081 | 0.7138 | 0.7193 | 0.7247 | 0.7301 | 0.7355 | 0.7402 | 0.7460 | 0.7508 | 0.7553 | 0.7593 | 0.7630 | 0.7664 | 0.7698 | 0.7733 | 0.7765 | 0.7793 | 0.7821 | 0.7846 | 0.7867 | 0.7889 | 0.7912 | 0.7936 | 0.7962 |
| Spain                   | 0.7459 | 0.7524 | 0.7587 | 0.7643 | 0.7698 | 0.7752 | 0.7804 | 0.7857 | 0.7909 | 0.7962 | 0.8013 | 0.8063 | 0.8112 | 0.8159 | 0.8202 | 0.8244 | 0.8284 | 0.8325 | 0.8360 | 0.8385 | 0.8404 | 0.8419 | 0.8431 | 0.8440 | 0.8451 | 0.8465 | 0.8482 |
| Sweden                  | 0.8066 | 0.8105 | 0.8156 | 0.8217 | 0.8295 | 0.8382 | 0.8450 | 0.8494 | 0.8526 | 0.8550 | 0.8568 | 0.8574 | 0.8567 | 0.8569 | 0.8582 | 0.8581 | 0.8579 | 0.8592 | 0.8601 | 0.8593 | 0.8602 | 0.8639 | 0.8670 | 0.8687 | 0.8700 | 0.8711 | 0.8724 |
| Switzerland             | 0.8689 | 0.8699 | 0.8721 | 0.8741 | 0.8741 | 0.8741 | 0.8741 | 0.8743 | 0.8749 | 0.8755 | 0.8764 | 0.8774 | 0.8784 | 0.8791 | 0.8800 | 0.8811 | 0.8826 | 0.8846 | 0.8867 | 0.8879 | 0.8893 | 0.8912 | 0.8932 | 0.8949 | 0.8965 | 0.8987 | 0.9013 |
| United Kingdom          | 0.7635 | 0.7693 | 0.7754 | 0.7815 | 0.7874 | 0.7926 | 0.7972 | 0.8024 | 0.8083 | 0.8151 | 0.8216 | 0.8268 | 0.8298 | 0.8315 | 0.8343 | 0.8369 | 0.8383 | 0.8396 | 0.8416 | 0.8433 | 0.8460 | 0.8489 | 0.8528 | 0.8572 | 0.8600 | 0.8618 | 0.8634 |
| Sweden except Stockholm | 0.7841 | 0.7885 | 0.7941 | 0.8009 | 0.8093 | 0.8186 | 0.8259 | 0.8307 | 0.8342 | 0.8368 | 0.8389 | 0.8397 | 0.8393 | 0.8399 | 0.8415 | 0.8414 | 0.8414 | 0.8432 | 0.8448 | 0.8443 | 0.8458 | 0.8501 | 0.8538 | 0.8562 | 0.8580 | 0.8597 | 0.8612 |
| Stockholm               | 0.8793 | 0.8817 | 0.8850 | 0.8890 | 0.8907 | 0.8920 | 0.8933 | 0.8948 | 0.8965 | 0.8986 | 0.9009 | 0.9029 | 0.9047 | 0.9061 | 0.9078 | 0.9094 | 0.9102 | 0.9107 | 0.9106 | 0.9102 | 0.9106 | 0.9105 | 0.9105 | 0.9105 | 0.9105 | 0.9105 | 0.9105 |
| Northern Ireland        | 0.7817 | 0.7881 | 0.7950 | 0.8017 | 0.8073 | 0.8112 | 0.8148 | 0.8196 | 0.8256 | 0.8322 | 0.8380 | 0.8424 | 0.8458 | 0.8482 | 0.8503 | 0.8516 | 0.8515 | 0.8513 | 0.8528 | 0.8547 | 0.8557 | 0.8570 | 0.8595 | 0.8629 | 0.8664 | 0.8696 | 0.8724 |
| Scotland                | 0.7553 | 0.7590 | 0.7642 | 0.7699 | 0.7751 | 0.7792 | 0.7824 | 0.7864 | 0.7918 | 0.7971 | 0.8014 | 0.8055 | 0.8093 | 0.8108 | 0.8127 | 0.8147 | 0.8156 | 0.8159 | 0.8177 | 0.8207 | 0.8232 | 0.8261 | 0.8296 | 0.8324 | 0.8338 | 0.8352 | 0.8369 |
| Wales                   | 0.7372 | 0.7422 | 0.7485 | 0.7555 | 0.7622 | 0.7671 | 0.7718 | 0.7779 | 0.7850 | 0.7924 | 0.7999 | 0.8065 | 0.8110 | 0.8131 | 0.8158 | 0.8189 | 0.8208 | 0.8224 | 0.8248 | 0.8267 | 0.8294 | 0.8330 | 0.8371 | 0.8420 | 0.8452 | 0.8470 | 0.8484 |
| England                 | 0.7647 | 0.7708 | 0.7769 | 0.7830 | 0.7890 | 0.7943 | 0.7991 | 0.8044 | 0.8103 | 0.8172 | 0.8239 | 0.8291 | 0.8319 | 0.8336 | 0.8366 | 0.8392 | 0.8407 | 0.8422 | 0.8441 | 0.8457 | 0.8484 | 0.8514 | 0.8553 | 0.8599 | 0.8628 | 0.8646 | 0.8662 |
| Darlington              | 0.7463 | 0.7498 | 0.7560 | 0.7638 | 0.7723 | 0.7794 | 0.7854 | 0.7906 | 0.7959 | 0.8022 | 0.8081 | 0.8120 | 0.8130 | 0.8139 | 0.8172 | 0.8202 | 0.8226 | 0.8238 | 0.8241 | 0.8253 | 0.8306 | 0.8361 | 0.8414 | 0.8457 | 0.8478 | 0.8483 | 0.8486 |
| Northumberland          | 0.7421 | 0.7456 | 0.7500 | 0.7556 | 0.7623 | 0.7694 | 0.7748 | 0.7812 | 0.7871 | 0.7920 | 0.7968 | 0.8001 | 0.8023 | 0.8036 | 0.8057 | 0.8080 | 0.8100 | 0.8122 | 0.8151 | 0.8171 | 0.8192 | 0.8214 | 0.8245 | 0.8282 | 0.8303 | 0.8314 | 0.8323 |
| Stockton-on-Tees        | 0.7483 | 0.7529 | 0.7592 | 0.7663 | 0.7738 | 0.7800 | 0.7856 | 0.7917 | 0.7985 | 0.8058 | 0.8117 | 0.8154 | 0.8169 | 0.8181 | 0.8204 | 0.8224 | 0.8238 | 0.8253 | 0.8271 | 0.8287 | 0.8306 | 0.8326 | 0.8355 | 0.8398 |        |        |        |

Appendix Table SB. SDI Values by location, 1990-2016

| Location                    | 1990   | 1991   | 1992   | 1993   | 1994   | 1995   | 1996   | 1997   | 1998   | 1999   | 2000   | 2001   | 2002   | 2003   | 2004   | 2005   | 2006   | 2007   | 2008   | 2009   | 2010   | 2011   | 2012   | 2013   | 2014   | 2015   | 2016   |
|-----------------------------|--------|--------|--------|--------|--------|--------|--------|--------|--------|--------|--------|--------|--------|--------|--------|--------|--------|--------|--------|--------|--------|--------|--------|--------|--------|--------|--------|
| Rochdale                    | 0.7201 | 0.7249 | 0.7308 | 0.7374 | 0.7442 | 0.7500 | 0.7549 | 0.7604 | 0.7665 | 0.7732 | 0.7789 | 0.7826 | 0.7841 | 0.7851 | 0.7868 | 0.7881 | 0.7876 | 0.7876 | 0.7890 | 0.7913 | 0.7954 | 0.7998 | 0.8047 | 0.8096 | 0.8125 | 0.8141 | 0.8153 |
| Wigan                       | 0.7274 | 0.7331 | 0.7393 | 0.7458 | 0.7523 | 0.7581 | 0.7633 | 0.7686 | 0.7739 | 0.7795 | 0.7846 | 0.7886 | 0.7910 | 0.7926 | 0.7950 | 0.7971 | 0.7980 | 0.8001 | 0.8008 | 0.8036 | 0.8069 | 0.8114 | 0.8165 | 0.8200 | 0.8223 | 0.8241 |        |
| Halton                      | 0.7395 | 0.7450 | 0.7517 | 0.7592 | 0.7667 | 0.7730 | 0.7778 | 0.7816 | 0.7862 | 0.7924 | 0.7997 | 0.8063 | 0.8096 | 0.8106 | 0.8124 | 0.8143 | 0.8159 | 0.8175 | 0.8202 | 0.8224 | 0.8270 | 0.8317 | 0.8362 | 0.8419 | 0.8466 | 0.8503 | 0.8532 |
| Liverpool                   | 0.7381 | 0.7498 | 0.7596 | 0.7672 | 0.7730 | 0.7772 | 0.7814 | 0.7870 | 0.7945 | 0.8032 | 0.8121 | 0.8179 | 0.8241 | 0.8301 | 0.8358 | 0.8393 | 0.8419 | 0.8444 | 0.8477 | 0.8515 | 0.8551 | 0.8585 | 0.8620 | 0.8654 | 0.8671 | 0.8684 | 0.8695 |
| Tameside                    | 0.7239 | 0.7304 | 0.7373 | 0.7442 | 0.7507 | 0.7561 | 0.7607 | 0.7658 | 0.7715 | 0.7782 | 0.7856 | 0.7915 | 0.7950 | 0.7971 | 0.7999 | 0.8015 | 0.8011 | 0.8005 | 0.8004 | 0.8002 | 0.8020 | 0.8048 | 0.8088 | 0.8132 | 0.8161 | 0.8180 | 0.8196 |
| Salford                     | 0.7373 | 0.7442 | 0.7524 | 0.7611 | 0.7691 | 0.7752 | 0.7796 | 0.7843 | 0.7907 | 0.7990 | 0.8071 | 0.8136 | 0.8179 | 0.8209 | 0.8251 | 0.8284 | 0.8307 | 0.8325 | 0.8337 | 0.8352 | 0.8389 | 0.8430 | 0.8478 | 0.8529 | 0.8563 | 0.8586 | 0.8607 |
| Blackburn with Darwen       | 0.7203 | 0.7263 | 0.7325 | 0.7390 | 0.7452 | 0.7505 | 0.7550 | 0.7599 | 0.7648 | 0.7698 | 0.7755 | 0.7794 | 0.7809 | 0.7818 | 0.7843 | 0.7857 | 0.7857 | 0.7875 | 0.7907 | 0.7935 | 0.7977 | 0.8021 | 0.8066 | 0.8121 | 0.8156 | 0.8179 | 0.8196 |
| Knowsley                    | 0.7201 | 0.7265 | 0.7327 | 0.7385 | 0.7442 | 0.7496 | 0.7553 | 0.7616 | 0.7676 | 0.7736 | 0.7807 | 0.7872 | 0.7906 | 0.7923 | 0.7954 | 0.7994 | 0.8030 | 0.8067 | 0.8109 | 0.8134 | 0.8162 | 0.8186 | 0.8220 | 0.8277 | 0.8316 | 0.8343 | 0.8365 |
| Blackpool                   | 0.7105 | 0.7218 | 0.7322 | 0.7401 | 0.7464 | 0.7508 | 0.7543 | 0.7593 | 0.7660 | 0.7726 | 0.7785 | 0.7816 | 0.7819 | 0.7800 | 0.7820 | 0.7860 | 0.7881 | 0.7877 | 0.7867 | 0.7878 | 0.7924 | 0.7962 | 0.7988 | 0.8013 | 0.8032 | 0.8060 | 0.8090 |
| Manchester                  | 0.7675 | 0.7746 | 0.7813 | 0.7887 | 0.7955 | 0.8014 | 0.8063 | 0.8117 | 0.8193 | 0.8292 | 0.8390 | 0.8474 | 0.8533 | 0.8575 | 0.8623 | 0.8660 | 0.8688 | 0.8719 | 0.8754 | 0.8784 | 0.8816 | 0.8843 | 0.8878 | 0.8922 | 0.8952 | 0.8974 | 0.8995 |
| North Yorkshire             | 0.7620 | 0.7650 | 0.7693 | 0.7743 | 0.7802 | 0.7854 | 0.7902 | 0.7958 | 0.8019 | 0.8085 | 0.8146 | 0.8186 | 0.8207 | 0.8221 | 0.8255 | 0.8290 | 0.8312 | 0.8326 | 0.8342 | 0.8353 | 0.8377 | 0.8405 | 0.8441 | 0.8480 | 0.8493 | 0.8494 | 0.8498 |
| East Riding of Yorkshire    | 0.7461 | 0.7521 | 0.7582 | 0.7647 | 0.7711 | 0.7766 | 0.7819 | 0.7877 | 0.7935 | 0.7990 | 0.8045 | 0.8084 | 0.8102 | 0.8113 | 0.8152 | 0.8178 | 0.8191 | 0.8207 | 0.8234 | 0.8254 | 0.8274 | 0.8283 | 0.8306 | 0.8337 | 0.8357 | 0.8371 | 0.8386 |
| York                        | 0.7808 | 0.7901 | 0.7985 | 0.8043 | 0.8098 | 0.8150 | 0.8192 | 0.8242 | 0.8306 | 0.8364 | 0.8422 | 0.8482 | 0.8540 | 0.8597 | 0.8654 | 0.8697 | 0.8735 | 0.8769 | 0.8795 | 0.8813 | 0.8829 | 0.8845 | 0.8862 | 0.8880 | 0.8898 | 0.8919 | 0.8940 |
| North East Lincolnshire     | 0.7430 | 0.7484 | 0.7554 | 0.7623 | 0.7685 | 0.7731 | 0.7761 | 0.7795 | 0.7835 | 0.7888 | 0.7953 | 0.8006 | 0.8025 | 0.8021 | 0.8029 | 0.8055 | 0.8084 | 0.8132 | 0.8172 | 0.8216 | 0.8252 | 0.8281 | 0.8306 | 0.8333 | 0.8342 | 0.8340 | 0.8341 |
| Calderdale                  | 0.7456 | 0.7501 | 0.7553 | 0.7611 | 0.7673 | 0.7727 | 0.7774 | 0.7826 | 0.7884 | 0.7948 | 0.8008 | 0.8049 | 0.8062 | 0.8069 | 0.8100 | 0.8135 | 0.8158 | 0.8177 | 0.8195 | 0.8208 | 0.8241 | 0.8279 | 0.8328 | 0.8385 | 0.8424 | 0.8452 | 0.8473 |
| North Lincolnshire          | 0.7411 | 0.7463 | 0.7514 | 0.7567 | 0.7632 | 0.7692 | 0.7751 | 0.7810 | 0.7870 | 0.7920 | 0.7964 | 0.8003 | 0.8020 | 0.8022 | 0.8033 | 0.8041 | 0.8046 | 0.8063 | 0.8095 | 0.8122 | 0.8163 | 0.8209 | 0.8260 | 0.8309 | 0.8334 | 0.8344 | 0.8350 |
| Bradford                    | 0.7257 | 0.7319 | 0.7380 | 0.7439 | 0.7499 | 0.7549 | 0.7592 | 0.7631 | 0.7674 | 0.7732 | 0.7789 | 0.7872 | 0.7861 | 0.7873 | 0.7898 | 0.7922 | 0.7948 | 0.7983 | 0.8023 | 0.8053 | 0.8078 | 0.8098 | 0.8121 | 0.8154 | 0.8171 | 0.8180 | 0.8189 |
| Kirklees                    | 0.7345 | 0.7409 | 0.7471 | 0.7531 | 0.7587 | 0.7632 | 0.7675 | 0.7725 | 0.7782 | 0.7847 | 0.7905 | 0.7946 | 0.7961 | 0.7973 | 0.8001 | 0.8028 | 0.8048 | 0.8071 | 0.8100 | 0.8117 | 0.8142 | 0.8168 | 0.8205 | 0.8249 | 0.8279 | 0.8300 | 0.8316 |
| Leeds                       | 0.7631 | 0.7706 | 0.7778 | 0.7846 | 0.7908 | 0.7962 | 0.8015 | 0.8074 | 0.8141 | 0.8225 | 0.8295 | 0.8357 | 0.8416 | 0.8471 | 0.8519 | 0.8571 | 0.8612 | 0.8652 | 0.8685 | 0.8693 | 0.8691 | 0.8684 | 0.8691 | 0.8717 | 0.8738 | 0.8756 | 0.8775 |
| Sheffield                   | 0.7533 | 0.7588 | 0.7644 | 0.7702 | 0.7760 | 0.7813 | 0.7864 | 0.7919 | 0.7983 | 0.8051 | 0.8119 | 0.8184 | 0.8231 | 0.8264 | 0.8308 | 0.8348 | 0.8384 | 0.8430 | 0.8475 | 0.8505 | 0.8530 | 0.8547 | 0.8572 | 0.8605 | 0.8629 | 0.8648 | 0.8665 |
| Wakefield                   | 0.7331 | 0.7383 | 0.7437 | 0.7495 | 0.7557 | 0.7610 | 0.7657 | 0.7709 | 0.7769 | 0.7843 | 0.7915 | 0.7971 | 0.7999 | 0.8015 | 0.8040 | 0.8058 | 0.8067 | 0.8076 | 0.8090 | 0.8100 | 0.8124 | 0.8153 | 0.8198 | 0.8250 | 0.8282 | 0.8306 | 0.8325 |
| Rotherham                   | 0.7200 | 0.7251 | 0.7307 | 0.7370 | 0.7434 | 0.7487 | 0.7532 | 0.7580 | 0.7634 | 0.7693 | 0.7757 | 0.7813 | 0.7850 | 0.7877 | 0.7912 | 0.7937 | 0.7949 | 0.7966 | 0.7987 | 0.8008 | 0.8040 | 0.8066 | 0.8094 | 0.8132 | 0.8162 | 0.8182 | 0.8200 |
| Doncaster                   | 0.7162 | 0.7205 | 0.7252 | 0.7303 | 0.7358 | 0.7409 | 0.7453 | 0.7505 | 0.7564 | 0.7626 | 0.7689 | 0.7739 | 0.7770 | 0.7790 | 0.7821 | 0.7849 | 0.7871 | 0.7899 | 0.7930 | 0.7959 | 0.8005 | 0.8046 | 0.8090 | 0.8135 | 0.8162 | 0.8177 | 0.8190 |
| Kingston upon Hull, City of | 0.7245 | 0.7315 | 0.7395 | 0.7470 | 0.7540 | 0.7594 | 0.7643 | 0.7697 | 0.7759 | 0.7827 | 0.7907 | 0.7966 | 0.8004 | 0.8035 | 0.8077 | 0.8122 | 0.8168 | 0.8215 | 0.8250 | 0.8261 | 0.8254 | 0.8245 | 0.8268 | 0.8312 | 0.8348 | 0.8376 | 0.8399 |
| Barnsley                    | 0.7121 | 0.7176 | 0.7238 | 0.7304 | 0.7367 | 0.7418 | 0.7468 | 0.7528 | 0.7596 | 0.7660 | 0.7718 | 0.7760 | 0.7782 | 0.7796 | 0.7822 | 0.7842 | 0.7860 | 0.7886 | 0.7907 | 0.7916 | 0.7939 | 0.7966 | 0.8009 | 0.8064 | 0.8099 | 0.8121 | 0.8139 |
| Northamptonshire            | 0.7512 | 0.7572 | 0.7639 | 0.7706 | 0.7773 | 0.7832 | 0.7883 | 0.7934 | 0.7986 | 0.8048 | 0.8111 | 0.8156 | 0.8177 | 0.8189 | 0.8214 | 0.8235 | 0.8249 | 0.8265 | 0.8282 | 0.8296 | 0.8325 | 0.8353 | 0.8387 | 0.8429 | 0.8448 | 0.8454 | 0.8458 |
| Leicestershire              | 0.7602 | 0.7649 | 0.7705 | 0.7762 | 0.7820 | 0.7873 | 0.7924 | 0.7981 | 0.8041 | 0.8100 | 0.8160 | 0.8208 | 0.8234 | 0.8256 | 0.8293 | 0.8328 | 0.8357 | 0.8390 | 0.8416 | 0.8431 | 0.8450 | 0.8468 | 0.8501 | 0.8542 | 0.8571 | 0.8592 | 0.8608 |
| Lincolnshire                | 0.7411 | 0.7443 | 0.7488 | 0.7545 | 0.7613 | 0.7677 | 0.7732 | 0.7786 | 0.7842 | 0.7900 | 0.7960 | 0.8016 | 0.8051 | 0.8077 | 0.8100 | 0.8108 | 0.8108 | 0.8119 | 0.8131 | 0.8160 | 0.8192 | 0.8233 | 0.8280 | 0.8306 | 0.8320 | 0.8333 | 0.8333 |
| Rutland                     | 0.7707 | 0.7725 | 0.7765 | 0.7844 | 0.7901 | 0.7956 | 0.8007 | 0.8057 | 0.8106 | 0.8153 | 0.8201 | 0.8137 | 0.8106 | 0.7815 | 0.7579 | 0.7878 | 0.7972 | 0.8036 | 0.8087 | 0.8169 | 0.8306 | 0.8390 | 0.8392 | 0.8385 | 0.8384 | 0.8388 | 0.8397 |
| Derby                       | 0.7481 | 0.7555 | 0.7643 | 0.7735 | 0.7821 | 0.7887 | 0.7938 | 0.7984 | 0.8032 | 0.8098 | 0.8163 | 0.8219 | 0.8265 | 0.8294 | 0.8335 | 0.8366 | 0.8382 | 0.8408 | 0.8439 | 0.8451 | 0.8456 | 0.8461 | 0.8493 | 0.8546 | 0.8584 | 0.8615 | 0.8642 |
| Derbyshire                  | 0.7368 | 0.7415 | 0.7473 | 0.7536 | 0.7603 | 0.7663 | 0.7718 | 0.7775 | 0.7835 | 0.7903 | 0.7961 | 0.8006 | 0.8032 | 0.8047 | 0.8074 | 0.8098 | 0.8118 | 0.8137 | 0.8154 | 0.8161 | 0.8184 | 0.8217 | 0.8264 | 0.8320 | 0.8359 | 0.8386 | 0.8407 |
| Nottinghamshire             | 0.7351 | 0.7399 | 0.7453 | 0.7510 | 0.7568 | 0.7616 | 0.7661 | 0.7712 | 0.7777 | 0.7859 | 0.7941 | 0.8004 | 0.8045 | 0.8073 | 0.8106 | 0.8137 | 0.8157 | 0.8173 | 0.8186 | 0.8189 | 0.8196 | 0.8211 | 0.8242 | 0.8285 | 0.8314 | 0.8335 | 0.8354 |
| Nottingham                  | 0.7601 | 0.7690 | 0.7774 | 0.7855 | 0.7933 | 0.8005 | 0.8072 | 0.8148 | 0.8224 | 0.8283 | 0.8341 | 0.8402 | 0.8462 | 0.8499 | 0.8554 | 0.8602 | 0.8633 | 0.8666 | 0.8698 | 0.8711 | 0.8710 | 0.8703 | 0.8713 | 0.8734 | 0.8751 | 0.8766 | 0.8780 |
| Leicester                   | 0.7330 | 0.7439 | 0.7532 | 0.7613 | 0.7684 | 0.7738 | 0.7777 | 0.7815 | 0.7861 | 0.7925 | 0.8005 | 0.8073 | 0.8114 | 0.8141 | 0.8184 | 0.8219 | 0.8249 | 0.8280 | 0.8314 | 0.8336 | 0.8357 | 0.8373 | 0.8397 | 0.8426 | 0.8449 | 0.8471 | 0.8491 |
| Warwickshire                | 0.7659 | 0.7716 | 0.7781 | 0.7844 | 0.7906 | 0.7958 | 0.8007 | 0.8062 | 0.8119 | 0.8185 | 0.8246 | 0.8299 | 0.8335 | 0.8358 | 0.8383 | 0.8399 | 0.8407 | 0.8418 | 0.8437 | 0.8455 | 0.8488 | 0.8522 | 0.8563 | 0.8607 | 0.8630 | 0.8643 | 0.8654 |
| Herefordshire, County of    | 0.7408 | 0.7455 | 0.7520 | 0.7590 | 0.7654 | 0.7703 | 0.7748 | 0.7803 | 0.7860 | 0.7935 | 0.8011 | 0.8067 | 0.8091 | 0.8110 | 0.8135 | 0.8149 | 0.8148 | 0.8144 | 0.8149 | 0.8160 | 0.8211 | 0.8281 | 0.8355 | 0.8420 | 0.8460 | 0.8483 | 0.8499 |
| Solihull                    | 0.7681 | 0.7727 | 0.7793 | 0.7867 | 0.7941 | 0.8007 | 0.8070 | 0.8136 | 0.8199 | 0.8256 | 0.8301 | 0.8338 | 0.8364 | 0.8388 | 0.8424 | 0.8461 | 0.8488 | 0.8511 | 0.8518 | 0.8513 | 0.8517 | 0.8533 | 0.8574 | 0.8611 | 0.8630 | 0.8636 | 0.8645 |
| Shropshire                  | 0.7461 | 0.7498 | 0.7551 | 0.7611 | 0.7677 | 0.7733 | 0.7782 | 0.7834 | 0.7896 | 0.7960 | 0.8016 | 0.8053 | 0.8076 | 0.8103 | 0.8145 | 0.8173 | 0.8177 | 0.8181 | 0.8203 | 0.8236 | 0.8289 | 0.8342 | 0.8388 | 0.8430 | 0.8451 | 0.8461 | 0.8471 |
| Worcestershire              | 0.7419 | 0.7467 | 0.7526 | 0.7587 | 0.7649 | 0.7702 | 0.7750 | 0.7804 | 0.7871 | 0.7956 | 0.8042 | 0.8102 | 0.8129 | 0.8152 | 0.8188 | 0.8210 | 0.8224 | 0.8231 | 0.8242 | 0.8252 | 0.8281 | 0.     |        |        |        |        |        |

Appendix Table SB. SDI Values by location, 1990-2016

| Location               | 1990   | 1991   | 1992   | 1993   | 1994   | 1995   | 1996   | 1997   | 1998   | 1999   | 2000   | 2001   | 2002   | 2003   | 2004   | 2005   | 2006   | 2007   | 2008   | 2009   | 2010   | 2011   | 2012   | 2013   | 2014   | 2015   | 2016   |        |
|------------------------|--------|--------|--------|--------|--------|--------|--------|--------|--------|--------|--------|--------|--------|--------|--------|--------|--------|--------|--------|--------|--------|--------|--------|--------|--------|--------|--------|--------|
| Barnet                 | 0.7871 | 0.7923 | 0.7973 | 0.8029 | 0.8096 | 0.8163 | 0.8229 | 0.8294 | 0.8354 | 0.8410 | 0.8462 | 0.8511 | 0.8531 | 0.8541 | 0.8554 | 0.8551 | 0.8540 | 0.8534 | 0.8547 | 0.8567 | 0.8603 | 0.8646 | 0.8699 | 0.8749 | 0.8778 | 0.8791 | 0.8802 |        |
| Westminster            | 0.8529 | 0.8603 | 0.8649 | 0.8692 | 0.8727 | 0.8772 | 0.8819 | 0.8864 | 0.8910 | 0.8963 | 0.9014 | 0.9059 | 0.9100 | 0.9136 | 0.9175 | 0.9213 | 0.9243 | 0.9267 | 0.9288 | 0.9306 | 0.9326 | 0.9346 | 0.9364 | 0.9379 | 0.9395 | 0.9411 | 0.9426 |        |
| Bromley                | 0.7792 | 0.7841 | 0.7886 | 0.7933 | 0.7987 | 0.8037 | 0.8088 | 0.8147 | 0.8213 | 0.8289 | 0.8347 | 0.8390 | 0.8417 | 0.8435 | 0.8460 | 0.8473 | 0.8483 | 0.8498 | 0.8510 | 0.8510 | 0.8507 | 0.8505 | 0.8532 | 0.8570 | 0.8598 | 0.8616 | 0.8631 |        |
| Bexley                 | 0.7490 | 0.7556 | 0.7621 | 0.7684 | 0.7739 | 0.7780 | 0.7811 | 0.7843 | 0.7889 | 0.7946 | 0.8007 | 0.8060 | 0.8093 | 0.8112 | 0.8136 | 0.8148 | 0.8154 | 0.8167 | 0.8193 | 0.8211 | 0.8227 | 0.8240 | 0.8278 | 0.8329 | 0.8362 | 0.8382 | 0.8398 |        |
| Redbridge              | 0.7568 | 0.7615 | 0.7666 | 0.7720 | 0.7774 | 0.7823 | 0.7869 | 0.7918 | 0.7972 | 0.8037 | 0.8098 | 0.8148 | 0.8182 | 0.8200 | 0.8221 | 0.8232 | 0.8245 | 0.8267 | 0.8297 | 0.8304 | 0.8307 | 0.8311 | 0.8336 | 0.8373 | 0.8383 | 0.8413 | 0.8428 |        |
| Merton                 | 0.7818 | 0.7919 | 0.7999 | 0.8069 | 0.8132 | 0.8182 | 0.8228 | 0.8285 | 0.8360 | 0.8447 | 0.8518 | 0.8567 | 0.8593 | 0.8608 | 0.8635 | 0.8652 | 0.8661 | 0.8672 | 0.8692 | 0.8696 | 0.8699 | 0.8706 | 0.8740 | 0.8785 | 0.8811 | 0.8823 | 0.8836 |        |
| Brent                  | 0.7838 | 0.7882 | 0.7924 | 0.7971 | 0.8024 | 0.8067 | 0.8105 | 0.8147 | 0.8198 | 0.8261 | 0.8340 | 0.8410 | 0.8446 | 0.8458 | 0.8472 | 0.8465 | 0.8425 | 0.8362 | 0.8320 | 0.8325 | 0.8402 | 0.8498 | 0.8582 | 0.8639 | 0.8656 | 0.8655 | 0.8655 |        |
| Hillingdon             | 0.8074 | 0.8138 | 0.8205 | 0.8274 | 0.8341 | 0.8395 | 0.8442 | 0.8483 | 0.8534 | 0.8592 | 0.8626 | 0.8664 | 0.8680 | 0.8689 | 0.8706 | 0.8709 | 0.8702 | 0.8704 | 0.8723 | 0.8742 | 0.8759 | 0.8780 | 0.8822 | 0.8879 | 0.8919 | 0.8947 | 0.8968 |        |
| Havering               | 0.7504 | 0.7561 | 0.7618 | 0.7677 | 0.7736 | 0.7785 | 0.7827 | 0.7870 | 0.7920 | 0.7981 | 0.8035 | 0.8076 | 0.8103 | 0.8120 | 0.8151 | 0.8181 | 0.8204 | 0.8221 | 0.8248 | 0.8267 | 0.8282 | 0.8287 | 0.8305 | 0.8330 | 0.8347 | 0.8359 | 0.8372 |        |
| Kingston upon Thames   | 0.8039 | 0.8113 | 0.8179 | 0.8233 | 0.8277 | 0.8323 | 0.8368 | 0.8424 | 0.8496 | 0.8585 | 0.8639 | 0.8690 | 0.8738 | 0.8778 | 0.8811 | 0.8836 | 0.8859 | 0.8880 | 0.8908 | 0.8916 | 0.8920 | 0.8922 | 0.8949 | 0.8982 | 0.8999 | 0.9009 | 0.9017 |        |
| Sutton                 | 0.7623 | 0.7694 | 0.7762 | 0.7829 | 0.7898 | 0.7960 | 0.8016 | 0.8073 | 0.8137 | 0.8210 | 0.8277 | 0.8329 | 0.8341 | 0.8343 | 0.8361 | 0.8379 | 0.8401 | 0.8423 | 0.8452 | 0.8462 | 0.8468 | 0.8475 | 0.8502 | 0.8535 | 0.8556 | 0.8570 | 0.8585 |        |
| Harrow                 | 0.7719 | 0.7815 | 0.7894 | 0.7964 | 0.8020 | 0.8060 | 0.8096 | 0.8143 | 0.8210 | 0.8291 | 0.8356 | 0.8396 | 0.8410 | 0.8415 | 0.8443 | 0.8465 | 0.8473 | 0.8481 | 0.8492 | 0.8495 | 0.8511 | 0.8519 | 0.8536 | 0.8557 | 0.8561 | 0.8556 | 0.8556 |        |
| Enfield                | 0.7669 | 0.7728 | 0.7783 | 0.7831 | 0.7867 | 0.7900 | 0.7932 | 0.7977 | 0.8037 | 0.8118 | 0.8199 | 0.8260 | 0.8285 | 0.8281 | 0.8279 | 0.8271 | 0.8262 | 0.8259 | 0.8280 | 0.8311 | 0.8367 | 0.8418 | 0.8468 | 0.8511 | 0.8530 | 0.8534 | 0.8537 |        |
| Croydon                | 0.7718 | 0.7796 | 0.7874 | 0.7945 | 0.8009 | 0.8061 | 0.8103 | 0.8146 | 0.8198 | 0.8259 | 0.8317 | 0.8363 | 0.8394 | 0.8411 | 0.8430 | 0.8427 | 0.8412 | 0.8402 | 0.8409 | 0.8415 | 0.8435 | 0.8452 | 0.8476 | 0.8498 | 0.8502 | 0.8493 | 0.8488 |        |
| Hammersmith and Fulham | 0.8490 | 0.8564 | 0.8616 | 0.8668 | 0.8721 | 0.8772 | 0.8827 | 0.8871 | 0.8913 | 0.8970 | 0.9014 | 0.9057 | 0.9094 | 0.9124 | 0.9158 | 0.9191 | 0.9205 | 0.9216 | 0.9238 | 0.9274 | 0.9322 | 0.9357 | 0.9372 | 0.9385 | 0.9397 | 0.9408 | 0.9424 |        |
| Ealing                 | 0.7952 | 0.7998 | 0.8049 | 0.8104 | 0.8163 | 0.8219 | 0.8274 | 0.8329 | 0.8394 | 0.8472 | 0.8535 | 0.8580 | 0.8601 | 0.8602 | 0.8609 | 0.8604 | 0.8590 | 0.8575 | 0.8573 | 0.8570 | 0.8592 | 0.8630 | 0.8678 | 0.8726 | 0.8755 | 0.8773 | 0.8791 |        |
| Greenwich              | 0.7527 | 0.7602 | 0.7681 | 0.7750 | 0.7804 | 0.7845 | 0.7882 | 0.7927 | 0.7983 | 0.8059 | 0.8140 | 0.8208 | 0.8249 | 0.8263 | 0.8269 | 0.8242 | 0.8214 | 0.8203 | 0.8220 | 0.8246 | 0.8296 | 0.8348 | 0.8407 | 0.8458 | 0.8484 | 0.8476 | 0.8476 |        |
| Wandsworth             | 0.8158 | 0.8248 | 0.8328 | 0.8387 | 0.8440 | 0.8490 | 0.8544 | 0.8597 | 0.8653 | 0.8724 | 0.8789 | 0.8851 | 0.8903 | 0.8946 | 0.8985 | 0.9021 | 0.9057 | 0.9072 | 0.9095 | 0.9106 | 0.9122 | 0.9146 | 0.9189 | 0.9222 | 0.9243 | 0.9261 | 0.9284 |        |
| Waltham Forest         | 0.7391 | 0.7462 | 0.7529 | 0.7598 | 0.7660 | 0.7705 | 0.7738 | 0.7775 | 0.7826 | 0.7896 | 0.7970 | 0.8034 | 0.8062 | 0.8065 | 0.8068 | 0.8052 | 0.8017 | 0.7982 | 0.7975 | 0.7997 | 0.7997 | 0.8066 | 0.8143 | 0.8216 | 0.8282 | 0.8318 | 0.8337 | 0.8352 |
| Camden                 | 0.8574 | 0.8621 | 0.8669 | 0.8719 | 0.8759 | 0.8806 | 0.8825 | 0.8844 | 0.8884 | 0.8972 | 0.9040 | 0.9088 | 0.9122 | 0.9152 | 0.9186 | 0.9219 | 0.9244 | 0.9268 | 0.9289 | 0.9310 | 0.9330 | 0.9352 | 0.9372 | 0.9389 | 0.9404 | 0.9419 | 0.9434 |        |
| Lambeth                | 0.7975 | 0.8113 | 0.8213 | 0.8283 | 0.8338 | 0.8380 | 0.8420 | 0.8468 | 0.8531 | 0.8605 | 0.8667 | 0.8710 | 0.8720 | 0.8727 | 0.8765 | 0.8809 | 0.8852 | 0.8908 | 0.8977 | 0.9033 | 0.9085 | 0.9137 | 0.9187 | 0.9206 | 0.9222 | 0.9237 | 0.9255 |        |
| Lewisham               | 0.7552 | 0.7661 | 0.7749 | 0.7818 | 0.7869 | 0.7901 | 0.7928 | 0.7963 | 0.8019 | 0.8101 | 0.8188 | 0.8257 | 0.8278 | 0.8275 | 0.8285 | 0.8300 | 0.8315 | 0.8330 | 0.8348 | 0.8362 | 0.8396 | 0.8439 | 0.8496 | 0.8561 | 0.8603 | 0.8628 | 0.8646 |        |
| Hounslow               | 0.7949 | 0.8046 | 0.8105 | 0.8147 | 0.8184 | 0.8219 | 0.8250 | 0.8294 | 0.8364 | 0.8465 | 0.8568 | 0.8638 | 0.8655 | 0.8638 | 0.8640 | 0.8652 | 0.8667 | 0.8680 | 0.8720 | 0.8735 | 0.8759 | 0.8783 | 0.8811 | 0.8856 | 0.8909 | 0.8914 | 0.8920 |        |
| Southwark              | 0.8157 | 0.8254 | 0.8327 | 0.8378 | 0.8411 | 0.8439 | 0.8450 | 0.8476 | 0.8535 | 0.8639 | 0.8746 | 0.8826 | 0.8850 | 0.8851 | 0.8877 | 0.8919 | 0.8963 | 0.9004 | 0.9043 | 0.9075 | 0.9114 | 0.9163 | 0.9227 | 0.9293 | 0.9329 | 0.9347 | 0.9366 |        |
| Newham                 | 0.7397 | 0.7475 | 0.7540 | 0.7585 | 0.7603 | 0.7592 | 0.7582 | 0.7603 | 0.7652 | 0.7752 | 0.7902 | 0.8035 | 0.8085 | 0.8082 | 0.8096 | 0.8109 | 0.8090 | 0.8025 | 0.7946 | 0.7950 | 0.8132 | 0.8330 | 0.8439 | 0.8499 | 0.8522 | 0.8526 | 0.8527 |        |
| Barking and Dagenham   | 0.7332 | 0.7392 | 0.7454 | 0.7518 | 0.7585 | 0.7627 | 0.7646 | 0.7684 | 0.7752 | 0.7839 | 0.7925 | 0.7991 | 0.8007 | 0.7975 | 0.7940 | 0.7898 | 0.7870 | 0.7873 | 0.7913 | 0.7944 | 0.7980 | 0.7997 | 0.8036 | 0.8102 | 0.8138 | 0.8146 | 0.8152 |        |
| Haringey               | 0.7771 | 0.7902 | 0.7989 | 0.8050 | 0.8094 | 0.8129 | 0.8166 | 0.8209 | 0.8252 | 0.8310 | 0.8373 | 0.8435 | 0.8465 | 0.8471 | 0.8492 | 0.8509 | 0.8504 | 0.8486 | 0.8476 | 0.8480 | 0.8554 | 0.8647 | 0.8724 | 0.8775 | 0.8796 | 0.8801 | 0.8804 |        |
| Hackney                | 0.8058 | 0.8136 | 0.8218 | 0.8282 | 0.8317 | 0.8315 | 0.8293 | 0.8291 | 0.8341 | 0.8441 | 0.8547 | 0.8629 | 0.8657 | 0.8660 | 0.8683 | 0.8712 | 0.8750 | 0.8807 | 0.8873 | 0.8937 | 0.9019 | 0.9095 | 0.9155 | 0.9203 | 0.9226 | 0.9233 | 0.9239 |        |
| Islington              | 0.8369 | 0.8437 | 0.8507 | 0.8576 | 0.8638 | 0.8689 | 0.8733 | 0.8772 | 0.8818 | 0.8882 | 0.8936 | 0.8980 | 0.9016 | 0.9051 | 0.9086 | 0.9122 | 0.9154 | 0.9186 | 0.9217 | 0.9246 | 0.9272 | 0.9299 | 0.9323 | 0.9343 | 0.9363 | 0.9382 | 0.9401 |        |
| Tower Hamlets          | 0.7938 | 0.7974 | 0.8010 | 0.8048 | 0.8091 | 0.8135 | 0.8187 | 0.8255 | 0.8342 | 0.8471 | 0.8594 | 0.8695 | 0.8756 | 0.8795 | 0.8854 | 0.8909 | 0.8962 | 0.9019 | 0.9075 | 0.9118 | 0.9155 | 0.9191 | 0.9238 | 0.9270 | 0.9289 | 0.9306 | 0.9328 |        |
| Wokingham              | 0.8086 | 0.8104 | 0.8124 | 0.8145 | 0.8173 | 0.8203 | 0.8236 | 0.8286 | 0.8358 | 0.8458 | 0.8566 | 0.8649 | 0.8695 | 0.8719 | 0.8754 | 0.8791 | 0.8813 | 0.8826 | 0.8838 | 0.8833 | 0.8818 | 0.8803 | 0.8820 | 0.8869 | 0.8905 | 0.8932 | 0.8954 |        |
| Buckinghamshire        | 0.7903 | 0.7955 | 0.8010 | 0.8062 | 0.8121 | 0.8179 | 0.8230 | 0.8282 | 0.8336 | 0.8393 | 0.8452 | 0.8491 | 0.8503 | 0.8509 | 0.8538 | 0.8558 | 0.8562 | 0.8559 | 0.8562 | 0.8565 | 0.8583 | 0.8608 | 0.8647 | 0.8689 | 0.8716 | 0.8731 | 0.8743 |        |
| Surrey                 | 0.7931 | 0.8001 | 0.8060 | 0.8111 | 0.8161 | 0.8209 | 0.8255 | 0.8309 | 0.8375 | 0.8460 | 0.8536 | 0.8589 | 0.8613 | 0.8628 | 0.8649 | 0.8664 | 0.8671 | 0.8680 | 0.8691 | 0.8697 | 0.8711 | 0.8724 | 0.8755 | 0.8798 | 0.8824 | 0.8842 | 0.8857 |        |
| Windsor and Maidenhead | 0.7988 | 0.8089 | 0.8171 | 0.8237 | 0.8303 | 0.8365 | 0.8414 | 0.8456 | 0.8500 | 0.8561 | 0.8614 | 0.8653 | 0.8685 | 0.8718 | 0.8762 | 0.8790 | 0.8799 | 0.8811 | 0.8827 | 0.8837 | 0.8854 | 0.8877 | 0.8912 | 0.8964 | 0.9001 | 0.9025 | 0.9046 |        |
| West Berkshire         | 0.8086 | 0.8139 | 0.8202 | 0.8266 | 0.8329 | 0.8381 | 0.8422 | 0.8463 | 0.8513 | 0.8583 | 0.8646 | 0.8685 | 0.8694 | 0.8690 | 0.8691 | 0.8685 | 0.8661 | 0.8631 | 0.8619 | 0.8632 | 0.8677 | 0.8727 | 0.8781 | 0.8827 | 0.8849 | 0.8863 | 0.8873 |        |
| Hampshire              | 0.7757 | 0.7811 | 0.7862 | 0.7913 | 0.7971 | 0.8027 | 0.8080 | 0.8133 | 0.8187 | 0.8245 | 0.8299 | 0.8340 | 0.8362 | 0.8369 | 0.8391 | 0.8408 | 0.8415 | 0.8424 | 0.8437 | 0.8448 | 0.8473 | 0.8504 | 0.8545 | 0.8594 | 0.8624 | 0.8643 | 0.8658 |        |
| Bracknell Forest       | 0.7956 | 0.7993 | 0.8036 | 0.8084 | 0.8143 | 0.8196 | 0.8240 | 0.8280 | 0.8335 | 0.8416 | 0.8493 | 0.8548 | 0.8580 | 0.8599 | 0.8631 | 0.8664 | 0.8683 | 0.8699 | 0.8713 | 0.8717 | 0.8729 | 0.8746 | 0.8777 | 0.8816 | 0.8846 | 0.8867 | 0.8885 |        |
| West Sussex            | 0.7685 | 0.7743 | 0.7800 | 0.7855 | 0.7916 | 0.7975 | 0.8028 | 0.8084 | 0.8139 | 0.8194 | 0.8239 | 0.8273 | 0.8284 | 0.8285 | 0.8305 | 0.8323 | 0.8338 | 0.8350 | 0.8365 | 0.8380 | 0.8409 | 0.8437 | 0.8474 | 0.8518 | 0.8539 | 0.8551 | 0.8561 |        |
| Oxfordshire            | 0.7944 | 0.7995 | 0.8048 | 0.8101 | 0.8164 | 0.8222 | 0.8272 | 0.8324 | 0.8383 | 0.8450 | 0.8513 | 0.8559 | 0.8584 | 0.8604 | 0.8632 | 0.8653 | 0.8656 | 0.8658 | 0.8665 | 0.8675 |        |        |        |        |        |        |        |        |

Appendix Table SB. SDI Values by location, 1990-2016

| Location                  | 1990   | 1991   | 1992   | 1993   | 1994   | 1995   | 1996   | 1997   | 1998   | 1999   | 2000   | 2001   | 2002   | 2003   | 2004   | 2005   | 2006   | 2007   | 2008   | 2009   | 2010   | 2011   | 2012   | 2013   | 2014   | 2015   | 2016   |
|---------------------------|--------|--------|--------|--------|--------|--------|--------|--------|--------|--------|--------|--------|--------|--------|--------|--------|--------|--------|--------|--------|--------|--------|--------|--------|--------|--------|--------|
| Bournemouth               | 0.7587 | 0.7673 | 0.7751 | 0.7805 | 0.7859 | 0.7913 | 0.7968 | 0.8025 | 0.8084 | 0.8137 | 0.8202 | 0.8260 | 0.8313 | 0.8367 | 0.8415 | 0.8468 | 0.8464 | 0.8465 | 0.8474 | 0.8494 | 0.8532 | 0.8577 | 0.8619 | 0.8663 | 0.8689 | 0.8706 | 0.8722 |
| Cornwall                  | 0.7391 | 0.7434 | 0.7484 | 0.7541 | 0.7604 | 0.7659 | 0.7705 | 0.7760 | 0.7822 | 0.7888 | 0.7957 | 0.8009 | 0.8048 | 0.8084 | 0.8120 | 0.8149 | 0.8210 | 0.8210 | 0.8215 | 0.8219 | 0.8219 | 0.8227 | 0.8257 | 0.8297 | 0.8320 | 0.8335 | 0.8348 |
| Plymouth                  | 0.7567 | 0.7623 | 0.7695 | 0.7765 | 0.7826 | 0.7886 | 0.7933 | 0.7985 | 0.8040 | 0.8098 | 0.8151 | 0.8194 | 0.8216 | 0.8232 | 0.8268 | 0.8303 | 0.8329 | 0.8361 | 0.8391 | 0.8398 | 0.8401 | 0.8406 | 0.8430 | 0.8472 | 0.8498 | 0.8513 | 0.8529 |
| North East England        | 0.7372 | 0.7426 | 0.7488 | 0.7554 | 0.7620 | 0.7678 | 0.7732 | 0.7789 | 0.7852 | 0.7919 | 0.7985 | 0.8037 | 0.8070 | 0.8094 | 0.8130 | 0.8164 | 0.8189 | 0.8215 | 0.8241 | 0.8259 | 0.8280 | 0.8303 | 0.8336 | 0.8378 | 0.8405 | 0.8424 | 0.8441 |
| North West England        | 0.7457 | 0.7519 | 0.7588 | 0.7659 | 0.7725 | 0.7779 | 0.7827 | 0.7879 | 0.7939 | 0.8006 | 0.8073 | 0.8126 | 0.8157 | 0.8177 | 0.8208 | 0.8234 | 0.8247 | 0.8265 | 0.8278 | 0.8296 | 0.8327 | 0.8361 | 0.8403 | 0.8450 | 0.8479 | 0.8498 | 0.8514 |
| Yorkshire and the Humber  | 0.7435 | 0.7492 | 0.7553 | 0.7614 | 0.7675 | 0.7727 | 0.7775 | 0.7828 | 0.7887 | 0.7954 | 0.8021 | 0.8075 | 0.8107 | 0.8128 | 0.8163 | 0.8196 | 0.8222 | 0.8251 | 0.8281 | 0.8300 | 0.8321 | 0.8339 | 0.8368 | 0.8406 | 0.8430 | 0.8447 | 0.8462 |
| East Midlands             | 0.7459 | 0.7515 | 0.7577 | 0.7642 | 0.7708 | 0.7766 | 0.7818 | 0.7872 | 0.7931 | 0.7996 | 0.8061 | 0.8114 | 0.8145 | 0.8166 | 0.8198 | 0.8226 | 0.8245 | 0.8264 | 0.8284 | 0.8297 | 0.8316 | 0.8338 | 0.8371 | 0.8414 | 0.8441 | 0.8460 | 0.8476 |
| West Midlands             | 0.7408 | 0.7470 | 0.7536 | 0.7602 | 0.7663 | 0.7712 | 0.7756 | 0.7807 | 0.7866 | 0.7932 | 0.7998 | 0.8049 | 0.8078 | 0.8097 | 0.8129 | 0.8156 | 0.8172 | 0.8189 | 0.8211 | 0.8230 | 0.8258 | 0.8288 | 0.8328 | 0.8374 | 0.8403 | 0.8422 | 0.8437 |
| East of England           | 0.7623 | 0.7686 | 0.7745 | 0.7800 | 0.7859 | 0.7915 | 0.7967 | 0.8023 | 0.8083 | 0.8146 | 0.8203 | 0.8244 | 0.8265 | 0.8278 | 0.8307 | 0.8332 | 0.8347 | 0.8361 | 0.8377 | 0.8389 | 0.8410 | 0.8431 | 0.8462 | 0.8502 | 0.8526 | 0.8541 | 0.8554 |
| Greater London            | 0.8067 | 0.8146 | 0.8214 | 0.8274 | 0.8327 | 0.8372 | 0.8413 | 0.8461 | 0.8521 | 0.8601 | 0.8681 | 0.8746 | 0.8781 | 0.8799 | 0.8828 | 0.8851 | 0.8856 | 0.8861 | 0.8877 | 0.8900 | 0.8942 | 0.8989 | 0.9042 | 0.9094 | 0.9123 | 0.9139 | 0.9149 |
| South East England        | 0.7773 | 0.7832 | 0.7888 | 0.7941 | 0.7998 | 0.8054 | 0.8104 | 0.8157 | 0.8213 | 0.8278 | 0.8340 | 0.8386 | 0.8409 | 0.8423 | 0.8450 | 0.8471 | 0.8481 | 0.8490 | 0.8503 | 0.8513 | 0.8536 | 0.8561 | 0.8598 | 0.8642 | 0.8670 | 0.8687 | 0.8702 |
| South West England        | 0.7628 | 0.7679 | 0.7732 | 0.7788 | 0.7847 | 0.7902 | 0.7951 | 0.8008 | 0.8070 | 0.8137 | 0.8202 | 0.8250 | 0.8276 | 0.8294 | 0.8325 | 0.8350 | 0.8363 | 0.8375 | 0.8388 | 0.8396 | 0.8415 | 0.8437 | 0.8470 | 0.8513 | 0.8540 | 0.8557 | 0.8572 |
| Southern Latin America    | 0.6408 | 0.6473 | 0.6543 | 0.6619 | 0.6708 | 0.6780 | 0.6836 | 0.6883 | 0.6930 | 0.6976 | 0.7021 | 0.7062 | 0.7089 | 0.7120 | 0.7160 | 0.7202 | 0.7247 | 0.7293 | 0.7337 | 0.7379 | 0.7429 | 0.7487 | 0.7544 | 0.7597 | 0.7642 | 0.7681 | 0.7715 |
| Argentina                 | 0.6385 | 0.6452 | 0.6524 | 0.6602 | 0.6698 | 0.6786 | 0.6810 | 0.6840 | 0.6873 | 0.6910 | 0.6950 | 0.6985 | 0.7006 | 0.7029 | 0.7059 | 0.7098 | 0.7141 | 0.7186 | 0.7231 | 0.7272 | 0.7323 | 0.7385 | 0.7445 | 0.7500 | 0.7545 | 0.7582 | 0.7613 |
| Chile                     | 0.6446 | 0.6521 | 0.6601 | 0.6684 | 0.6766 | 0.6853 | 0.6939 | 0.7021 | 0.7096 | 0.7162 | 0.7220 | 0.7275 | 0.7319 | 0.7372 | 0.7436 | 0.7488 | 0.7538 | 0.7585 | 0.7629 | 0.7670 | 0.7717 | 0.7770 | 0.7822 | 0.7872 | 0.7918 | 0.7960 | 0.7998 |
| Uruguay                   | 0.6406 | 0.6425 | 0.6451 | 0.6479 | 0.6520 | 0.6561 | 0.6611 | 0.6669 | 0.6729 | 0.6780 | 0.6821 | 0.6854 | 0.6877 | 0.6900 | 0.6928 | 0.6963 | 0.7001 | 0.7043 | 0.7090 | 0.7138 | 0.7190 | 0.7244 | 0.7294 | 0.7343 | 0.7390 | 0.7433 | 0.7473 |
| High-income North America | 0.8521 | 0.8547 | 0.8575 | 0.8601 | 0.8626 | 0.8649 | 0.8670 | 0.8684 | 0.8696 | 0.8710 | 0.8733 | 0.8763 | 0.8776 | 0.8783 | 0.8798 | 0.8801 | 0.8797 | 0.8815 | 0.8854 | 0.8896 | 0.8929 | 0.8947 | 0.8962 | 0.8972 | 0.8983 | 0.8994 | 0.8999 |
| Canada                    | 0.8469 | 0.8494 | 0.8526 | 0.8554 | 0.8579 | 0.8622 | 0.8668 | 0.8703 | 0.8734 | 0.8775 | 0.8811 | 0.8839 | 0.8866 | 0.8886 | 0.8908 | 0.8919 | 0.8919 | 0.8923 | 0.8941 | 0.8967 | 0.8995 | 0.9014 | 0.9027 | 0.9040 | 0.9053 | 0.9066 | 0.9081 |
| United States             | 0.8525 | 0.8551 | 0.8579 | 0.8604 | 0.8630 | 0.8650 | 0.8667 | 0.8679 | 0.8689 | 0.8700 | 0.8722 | 0.8752 | 0.8763 | 0.8769 | 0.8784 | 0.8785 | 0.8781 | 0.8801 | 0.8842 | 0.8886 | 0.8919 | 0.8938 | 0.8953 | 0.8963 | 0.8973 | 0.8985 | 0.8989 |
| Greenland                 | 0.7504 | 0.7498 | 0.7479 | 0.7491 | 0.7497 | 0.7502 | 0.7504 | 0.7530 | 0.7580 | 0.7617 | 0.7632 | 0.7638 | 0.7665 | 0.7706 | 0.7749 | 0.7795 | 0.7833 | 0.7858 | 0.7879 | 0.7916 | 0.7981 | 0.8042 | 0.8081 | 0.8105 | 0.8125 | 0.8144 | 0.8159 |
| Alabama                   | 0.8317 | 0.8355 | 0.8391 | 0.8424 | 0.8454 | 0.8475 | 0.8488 | 0.8497 | 0.8508 | 0.8526 | 0.8557 | 0.8600 | 0.8624 | 0.8638 | 0.8653 | 0.8650 | 0.8639 | 0.8653 | 0.8691 | 0.8738 | 0.8779 | 0.8801 | 0.8815 | 0.8821 | 0.8827 | 0.8835 | 0.8838 |
| Alaska                    | 0.8453 | 0.8461 | 0.8484 | 0.8522 | 0.8563 | 0.8594 | 0.8613 | 0.8625 | 0.8630 | 0.8629 | 0.8628 | 0.8631 | 0.8630 | 0.8644 | 0.8679 | 0.8706 | 0.8718 | 0.8740 | 0.8776 | 0.8813 | 0.8846 | 0.8871 | 0.8898 | 0.8914 | 0.8936 | 0.8958 | 0.8968 |
| Arizona                   | 0.8374 | 0.8395 | 0.8417 | 0.8438 | 0.8458 | 0.8470 | 0.8480 | 0.8484 | 0.8482 | 0.8478 | 0.8488 | 0.8515 | 0.8525 | 0.8529 | 0.8546 | 0.8551 | 0.8558 | 0.8606 | 0.8682 | 0.8749 | 0.8789 | 0.8803 | 0.8809 | 0.8810 | 0.8811 | 0.8813 | 0.8808 |
| Arkansas                  | 0.8221 | 0.8261 | 0.8300 | 0.8332 | 0.8356 | 0.8371 | 0.8386 | 0.8399 | 0.8416 | 0.8435 | 0.8460 | 0.8492 | 0.8505 | 0.8512 | 0.8527 | 0.8527 | 0.8522 | 0.8545 | 0.8588 | 0.8634 | 0.8667 | 0.8687 | 0.8708 | 0.8722 | 0.8736 | 0.8752 | 0.8760 |
| California                | 0.8414 | 0.8430 | 0.8455 | 0.8481 | 0.8509 | 0.8538 | 0.8573 | 0.8605 | 0.8633 | 0.8656 | 0.8686 | 0.8719 | 0.8725 | 0.8721 | 0.8728 | 0.8726 | 0.8724 | 0.8750 | 0.8800 | 0.8853 | 0.8892 | 0.8911 | 0.8928 | 0.8942 | 0.8955 | 0.8972 | 0.8978 |
| Colorado                  | 0.8703 | 0.8725 | 0.8749 | 0.8777 | 0.8806 | 0.8826 | 0.8836 | 0.8833 | 0.8827 | 0.8822 | 0.8831 | 0.8853 | 0.8867 | 0.8881 | 0.8909 | 0.8922 | 0.8927 | 0.8951 | 0.8991 | 0.9030 | 0.9060 | 0.9080 | 0.9100 | 0.9116 | 0.9131 | 0.9144 | 0.9147 |
| Connecticut               | 0.8892 | 0.8920 | 0.8946 | 0.8968 | 0.8988 | 0.9005 | 0.9018 | 0.9028 | 0.9038 | 0.9052 | 0.9075 | 0.9102 | 0.9110 | 0.9109 | 0.9118 | 0.9118 | 0.9115 | 0.9134 | 0.9170 | 0.9212 | 0.9243 | 0.9261 | 0.9277 | 0.9288 | 0.9296 | 0.9303 | 0.9301 |
| Delaware                  | 0.8671 | 0.8709 | 0.8745 | 0.8776 | 0.8801 | 0.8820 | 0.8829 | 0.8824 | 0.8818 | 0.8819 | 0.8838 | 0.8871 | 0.8883 | 0.8887 | 0.8899 | 0.8890 | 0.8873 | 0.8883 | 0.8921 | 0.8969 | 0.9007 | 0.9030 | 0.9053 | 0.9069 | 0.9081 | 0.9092 | 0.9094 |
| District of Columbia      | 0.8739 | 0.8775 | 0.8833 | 0.8902 | 0.8978 | 0.9048 | 0.9113 | 0.9167 | 0.9210 | 0.9239 | 0.9266 | 0.9294 | 0.9296 | 0.9272 | 0.9260 | 0.9253 | 0.9248 | 0.9254 | 0.9278 | 0.9317 | 0.9352 | 0.9379 | 0.9409 | 0.9435 | 0.9457 | 0.9467 | 0.9475 |
| Florida                   | 0.8535 | 0.8572 | 0.8602 | 0.8629 | 0.8653 | 0.8674 | 0.8689 | 0.8697 | 0.8705 | 0.8711 | 0.8727 | 0.8753 | 0.8763 | 0.8766 | 0.8778 | 0.8779 | 0.8781 | 0.8812 | 0.8864 | 0.8915 | 0.8954 | 0.8971 | 0.8980 | 0.8981 | 0.8982 | 0.8985 | 0.8983 |
| Georgia                   | 0.8434 | 0.8477 | 0.8515 | 0.8546 | 0.8574 | 0.8594 | 0.8605 | 0.8605 | 0.8602 | 0.8601 | 0.8618 | 0.8655 | 0.8674 | 0.8683 | 0.8693 | 0.8683 | 0.8666 | 0.8669 | 0.8745 | 0.8802 | 0.8840 | 0.8859 | 0.8870 | 0.8874 | 0.8877 | 0.8882 | 0.8880 |
| Hawaii                    | 0.8540 | 0.8569 | 0.8597 | 0.8626 | 0.8660 | 0.8693 | 0.8723 | 0.8744 | 0.8753 | 0.8754 | 0.8755 | 0.8757 | 0.8741 | 0.8726 | 0.8738 | 0.8746 | 0.8746 | 0.8768 | 0.8805 | 0.8853 | 0.8892 | 0.8915 | 0.8938 | 0.8954 | 0.8980 | 0.9001 | 0.9009 |
| Idaho                     | 0.8330 | 0.8348 | 0.8370 | 0.8398 | 0.8425 | 0.8446 | 0.8462 | 0.8468 | 0.8476 | 0.8487 | 0.8507 | 0.8535 | 0.8542 | 0.8541 | 0.8551 | 0.8542 | 0.8527 | 0.8544 | 0.8587 | 0.8637 | 0.8675 | 0.8690 | 0.8702 | 0.8709 | 0.8715 | 0.8722 | 0.8721 |
| Illinois                  | 0.8557 | 0.8580 | 0.8605 | 0.8628 | 0.8655 | 0.8681 | 0.8706 | 0.8725 | 0.8740 | 0.8754 | 0.8778 | 0.8810 | 0.8827 | 0.8839 | 0.8863 | 0.8876 | 0.8883 | 0.8909 | 0.8948 | 0.8986 | 0.9016 | 0.9032 | 0.9048 | 0.9058 | 0.9067 | 0.9078 | 0.9081 |
| Indiana                   | 0.8477 | 0.8502 | 0.8523 | 0.8553 | 0.8575 | 0.8588 | 0.8596 | 0.8597 | 0.8599 | 0.8606 | 0.8625 | 0.8656 | 0.8668 | 0.8675 | 0.8686 | 0.8689 | 0.8681 | 0.8692 | 0.8722 | 0.8755 | 0.8779 | 0.8790 | 0.8801 | 0.8807 | 0.8815 | 0.8826 | 0.8831 |
| Iowa                      | 0.8542 | 0.8563 | 0.8585 | 0.8601 | 0.8622 | 0.8637 | 0.8652 | 0.8662 | 0.8670 | 0.8680 | 0.8702 | 0.8731 | 0.8744 | 0.8748 | 0.8762 | 0.8755 | 0.8743 | 0.8758 | 0.8797 | 0.8837 | 0.8867 | 0.8884 | 0.8897 | 0.8905 | 0.8914 | 0.8924 | 0.8929 |
| Kansas                    | 0.8565 | 0.8587 | 0.8606 | 0.8623 | 0.8639 | 0.8649 | 0.8656 | 0.8656 | 0.8658 | 0.8664 | 0.8683 | 0.8715 | 0.8729 | 0.8738 | 0.8754 | 0.8752 | 0.8741 | 0.8753 | 0.8789 | 0.8826 | 0.8856 | 0.8877 | 0.8899 | 0.8918 | 0.8933 | 0.8947 | 0.8952 |
| Kentucky                  | 0.8301 | 0.8330 | 0.8360 | 0.8388 | 0.8414 | 0.8433 | 0.8448 | 0.8459 | 0.8471 | 0.8488 | 0.8515 | 0.8548 | 0.8562 | 0.8567 | 0.8580 | 0.8580 | 0.8573 | 0.8583 | 0.8618 | 0.8651 | 0.8675 | 0.8686 | 0.8696 | 0.8703 | 0.8714 | 0.8730 | 0.8740 |
| Louisiana                 | 0.8238 | 0.8269 | 0.8300 | 0.8332 | 0.8368 | 0.8398 | 0.8422 | 0.8440 | 0.8457 | 0.8473 | 0.8498 | 0.8537 | 0.8559 | 0.8574 | 0.8596 | 0.8605 | 0.8612 | 0.8641 | 0.8686 | 0.8729 | 0.8764 | 0.8783 | 0.8802 |        |        |        |        |



Appendix Table SB. SDI Values by location, 1990-2016

| Location                         | 1990   | 1991   | 1992   | 1993   | 1994   | 1995   | 1996   | 1997   | 1998   | 1999   | 2000   | 2001   | 2002   | 2003   | 2004   | 2005   | 2006   | 2007   | 2008   | 2009   | 2010   | 2011   | 2012   | 2013   | 2014   | 2015   | 2016   |
|----------------------------------|--------|--------|--------|--------|--------|--------|--------|--------|--------|--------|--------|--------|--------|--------|--------|--------|--------|--------|--------|--------|--------|--------|--------|--------|--------|--------|--------|
| South Dakota                     | 0.8335 | 0.8361 | 0.8389 | 0.8423 | 0.8461 | 0.8489 | 0.8518 | 0.8534 | 0.8550 | 0.8567 | 0.8590 | 0.8614 | 0.8614 | 0.8617 | 0.8630 | 0.8625 | 0.8609 | 0.8633 | 0.8681 | 0.8725 | 0.8755 | 0.8771 | 0.8783 | 0.8792 | 0.8802 | 0.8812 | 0.8817 |
| Tennessee                        | 0.8372 | 0.8406 | 0.8442 | 0.8475 | 0.8507 | 0.8531 | 0.8547 | 0.8555 | 0.8566 | 0.8581 | 0.8605 | 0.8639 | 0.8656 | 0.8664 | 0.8674 | 0.8667 | 0.8654 | 0.8669 | 0.8709 | 0.8755 | 0.8788 | 0.8804 | 0.8816 | 0.8822 | 0.8830 | 0.8842 | 0.8847 |
| Texas                            | 0.8323 | 0.8338 | 0.8353 | 0.8371 | 0.8389 | 0.8404 | 0.8416 | 0.8425 | 0.8433 | 0.8439 | 0.8456 | 0.8486 | 0.8497 | 0.8505 | 0.8525 | 0.8531 | 0.8527 | 0.8550 | 0.8601 | 0.8656 | 0.8704 | 0.8732 | 0.8752 | 0.8761 | 0.8770 | 0.8780 | 0.8781 |
| Utah                             | 0.8223 | 0.8269 | 0.8306 | 0.8330 | 0.8345 | 0.8346 | 0.8344 | 0.8340 | 0.8342 | 0.8355 | 0.8387 | 0.8434 | 0.8456 | 0.8468 | 0.8489 | 0.8488 | 0.8476 | 0.8498 | 0.8546 | 0.8594 | 0.8628 | 0.8645 | 0.8660 | 0.8673 | 0.8685 | 0.8701 | 0.8704 |
| Vermont                          | 0.8689 | 0.8725 | 0.8758 | 0.8788 | 0.8820 | 0.8848 | 0.8870 | 0.8887 | 0.8905 | 0.8925 | 0.8951 | 0.8978 | 0.8989 | 0.9000 | 0.9024 | 0.9038 | 0.9045 | 0.9065 | 0.9093 | 0.9118 | 0.9135 | 0.9145 | 0.9157 | 0.9167 | 0.9180 | 0.9195 | 0.9204 |
| Virginia                         | 0.8684 | 0.8715 | 0.8743 | 0.8769 | 0.8796 | 0.8815 | 0.8828 | 0.8833 | 0.8835 | 0.8840 | 0.8855 | 0.8877 | 0.8881 | 0.8882 | 0.8897 | 0.8906 | 0.8912 | 0.8941 | 0.8986 | 0.9031 | 0.9066 | 0.9085 | 0.9102 | 0.9112 | 0.9121 | 0.9131 | 0.9134 |
| Washington                       | 0.8677 | 0.8704 | 0.8731 | 0.8758 | 0.8783 | 0.8801 | 0.8817 | 0.8832 | 0.8850 | 0.8875 | 0.8907 | 0.8941 | 0.8957 | 0.8964 | 0.8978 | 0.8972 | 0.8957 | 0.8965 | 0.8991 | 0.9021 | 0.9045 | 0.9058 | 0.9074 | 0.9085 | 0.9097 | 0.9111 | 0.9116 |
| West Virginia                    | 0.8318 | 0.8343 | 0.8372 | 0.8401 | 0.8431 | 0.8453 | 0.8472 | 0.8486 | 0.8496 | 0.8506 | 0.8520 | 0.8544 | 0.8558 | 0.8568 | 0.8578 | 0.8590 | 0.8586 | 0.8594 | 0.8620 | 0.8649 | 0.8672 | 0.8685 | 0.8700 | 0.8715 | 0.8733 | 0.8751 | 0.8763 |
| Wisconsin                        | 0.8586 | 0.8614 | 0.8641 | 0.8667 | 0.8694 | 0.8715 | 0.8731 | 0.8741 | 0.8750 | 0.8759 | 0.8776 | 0.8801 | 0.8812 | 0.8820 | 0.8837 | 0.8840 | 0.8837 | 0.8852 | 0.8882 | 0.8915 | 0.8941 | 0.8955 | 0.8970 | 0.8982 | 0.8995 | 0.9009 | 0.9016 |
| Wyoming                          | 0.8516 | 0.8539 | 0.8565 | 0.8597 | 0.8630 | 0.8650 | 0.8665 | 0.8684 | 0.8708 | 0.8735 | 0.8761 | 0.8783 | 0.8783 | 0.8780 | 0.8784 | 0.8774 | 0.8767 | 0.8795 | 0.8862 | 0.8928 | 0.8980 | 0.9008 | 0.9023 | 0.9028 | 0.9038 | 0.9049 | 0.9053 |
| Latin America and Caribbean      | 0.5464 | 0.5536 | 0.5608 | 0.5678 | 0.5746 | 0.5813 | 0.5881 | 0.5950 | 0.6018 | 0.6082 | 0.6150 | 0.6212 | 0.6269 | 0.6323 | 0.6378 | 0.6434 | 0.6494 | 0.6554 | 0.6613 | 0.6665 | 0.6720 | 0.6779 | 0.6836 | 0.6892 | 0.6949 | 0.7005 | 0.7050 |
| Caribbean                        | 0.5883 | 0.5943 | 0.5991 | 0.6022 | 0.6047 | 0.6076 | 0.6104 | 0.6132 | 0.6171 | 0.6215 | 0.6260 | 0.6305 | 0.6351 | 0.6401 | 0.6452 | 0.6507 | 0.6562 | 0.6600 | 0.6631 | 0.6668 | 0.6707 | 0.6749 | 0.6794 | 0.6833 | 0.6876 | 0.6921 | 0.6958 |
| Antigua and Barbuda              | 0.6844 | 0.6905 | 0.6956 | 0.7003 | 0.7044 | 0.7067 | 0.7097 | 0.7126 | 0.7156 | 0.7187 | 0.7215 | 0.7233 | 0.7253 | 0.7279 | 0.7310 | 0.7350 | 0.7402 | 0.7461 | 0.7518 | 0.7557 | 0.7587 | 0.7615 | 0.7645 | 0.7675 | 0.7708 | 0.7743 | 0.7776 |
| The Bahamas                      | 0.7188 | 0.7199 | 0.7206 | 0.7219 | 0.7244 | 0.7281 | 0.7331 | 0.7386 | 0.7446 | 0.7509 | 0.7565 | 0.7612 | 0.7651 | 0.7673 | 0.7686 | 0.7700 | 0.7714 | 0.7730 | 0.7745 | 0.7753 | 0.7762 | 0.7773 | 0.7785 | 0.7799 | 0.7814 | 0.7829 |        |
| Barbados                         | 0.7262 | 0.7318 | 0.7367 | 0.7411 | 0.7444 | 0.7476 | 0.7514 | 0.7552 | 0.7589 | 0.7625 | 0.7661 | 0.7690 | 0.7705 | 0.7719 | 0.7735 | 0.7758 | 0.7789 | 0.7820 | 0.7845 | 0.7863 | 0.7876 | 0.7887 | 0.7899 | 0.7915 | 0.7930 | 0.7948 | 0.7966 |
| Belize                           | 0.4519 | 0.4691 | 0.4866 | 0.5022 | 0.5149 | 0.5247 | 0.5318 | 0.5372 | 0.5416 | 0.5462 | 0.5516 | 0.5570 | 0.5626 | 0.5686 | 0.5745 | 0.5799 | 0.5847 | 0.5890 | 0.5927 | 0.5961 | 0.5997 | 0.6038 | 0.6080 | 0.6121 | 0.6166 | 0.6211 | 0.6247 |
| Cuba                             | 0.6849 | 0.6934 | 0.6980 | 0.6970 | 0.6960 | 0.6952 | 0.6947 | 0.6923 | 0.6926 | 0.6943 | 0.6974 | 0.7008 | 0.7053 | 0.7120 | 0.7192 | 0.7254 | 0.7320 | 0.7386 | 0.7392 | 0.7430 | 0.7466 | 0.7513 | 0.7572 | 0.7613 | 0.7665 | 0.7723 | 0.7776 |
| Dominica                         | 0.5957 | 0.6000 | 0.6051 | 0.6119 | 0.6200 | 0.6288 | 0.6372 | 0.6448 | 0.6526 | 0.6594 | 0.6650 | 0.6698 | 0.6738 | 0.6778 | 0.6820 | 0.6858 | 0.6901 | 0.6951 | 0.7007 | 0.7055 | 0.7099 | 0.7140 | 0.7176 | 0.7212 | 0.7253 | 0.7294 | 0.7337 |
| Dominican Republic               | 0.5269 | 0.5302 | 0.5346 | 0.5398 | 0.5453 | 0.5512 | 0.5579 | 0.5655 | 0.5737 | 0.5818 | 0.5893 | 0.5964 | 0.6033 | 0.6093 | 0.6152 | 0.6219 | 0.6294 | 0.6369 | 0.6434 | 0.6495 | 0.6560 | 0.6623 | 0.6684 | 0.6749 | 0.6822 | 0.6897 | 0.6961 |
| Grenada                          | 0.5001 | 0.5095 | 0.5186 | 0.5273 | 0.5356 | 0.5438 | 0.5522 | 0.5609 | 0.5707 | 0.5809 | 0.5907 | 0.5966 | 0.6086 | 0.6162 | 0.6273 | 0.6372 | 0.6457 | 0.6543 | 0.6621 | 0.6681 | 0.6738 | 0.6791 | 0.6837 | 0.6885 | 0.6936 | 0.6990 | 0.7038 |
| Guyana                           | 0.5170 | 0.5176 | 0.5202 | 0.5246 | 0.5303 | 0.5367 | 0.5445 | 0.5524 | 0.5588 | 0.5645 | 0.5690 | 0.5729 | 0.5761 | 0.5788 | 0.5815 | 0.5838 | 0.5871 | 0.5915 | 0.5962 | 0.6013 | 0.6071 | 0.6137 | 0.6209 | 0.6283 | 0.6357 | 0.6429 | 0.6486 |
| Haiti                            | 0.3033 | 0.3098 | 0.3154 | 0.3193 | 0.3214 | 0.3247 | 0.3291 | 0.3341 | 0.3394 | 0.3457 | 0.3520 | 0.3576 | 0.3628 | 0.3676 | 0.3718 | 0.3763 | 0.3810 | 0.3859 | 0.3910 | 0.3968 | 0.4016 | 0.4073 | 0.4128 | 0.4183 | 0.4235 | 0.4284 | 0.4319 |
| Jamaica                          | 0.5989 | 0.6038 | 0.6090 | 0.6145 | 0.6197 | 0.6247 | 0.6292 | 0.6330 | 0.6365 | 0.6398 | 0.6432 | 0.6467 | 0.6505 | 0.6548 | 0.6592 | 0.6639 | 0.6692 | 0.6743 | 0.6787 | 0.6821 | 0.6852 | 0.6884 | 0.6911 | 0.6937 | 0.6962 | 0.6990 | 0.7012 |
| Saint Lucia                      | 0.5548 | 0.5647 | 0.5745 | 0.5831 | 0.5907 | 0.5982 | 0.6062 | 0.6137 | 0.6215 | 0.6288 | 0.6354 | 0.6411 | 0.6471 | 0.6542 | 0.6617 | 0.6684 | 0.6738 | 0.6792 | 0.6844 | 0.6894 | 0.6925 | 0.6965 | 0.7001 | 0.7034 | 0.7066 | 0.7098 | 0.7131 |
| Saint Vincent and the Grenadines | 0.5159 | 0.5243 | 0.5329 | 0.5406 | 0.5475 | 0.5548 | 0.5620 | 0.5690 | 0.5758 | 0.5825 | 0.5890 | 0.5953 | 0.6016 | 0.6083 | 0.6149 | 0.6210 | 0.6272 | 0.6325 | 0.6377 | 0.6419 | 0.6452 | 0.6482 | 0.6513 | 0.6548 | 0.6588 | 0.6634 | 0.6675 |
| Suriname                         | 0.5658 | 0.5695 | 0.5723 | 0.5739 | 0.5750 | 0.5767 | 0.5796 | 0.5833 | 0.5867 | 0.5892 | 0.5925 | 0.5965 | 0.6014 | 0.6073 | 0.6141 | 0.6211 | 0.6283 | 0.6358 | 0.6434 | 0.6510 | 0.6587 | 0.6664 | 0.6735 | 0.6799 | 0.6858 | 0.6913 | 0.6957 |
| Trinidad and Tobago              | 0.6546 | 0.6593 | 0.6631 | 0.6659 | 0.6676 | 0.6689 | 0.6713 | 0.6752 | 0.6805 | 0.6872 | 0.6944 | 0.7004 | 0.7063 | 0.7130 | 0.7193 | 0.7250 | 0.7314 | 0.7379 | 0.7452 | 0.7504 | 0.7551 | 0.7577 | 0.7600 | 0.7619 | 0.7635 | 0.7649 | 0.7662 |
| Bermuda                          | 0.7331 | 0.7372 | 0.7411 | 0.7449 | 0.7485 | 0.7521 | 0.7559 | 0.7597 | 0.7632 | 0.7666 | 0.7701 | 0.7739 | 0.7770 | 0.7806 | 0.7847 | 0.7886 | 0.7925 | 0.7963 | 0.7987 | 0.8008 | 0.8032 | 0.8057 | 0.8081 | 0.8105 | 0.8130 | 0.8155 | 0.8186 |
| Puerto Rico                      | 0.7669 | 0.7742 | 0.7812 | 0.7876 | 0.7934 | 0.7989 | 0.8046 | 0.8105 | 0.8166 | 0.8224 | 0.8280 | 0.8343 | 0.8399 | 0.8449 | 0.8496 | 0.8539 | 0.8576 | 0.8605 | 0.8628 | 0.8658 | 0.8671 | 0.8683 | 0.8696 | 0.8712 | 0.8729 | 0.8747 | 0.8770 |
| Virgin Islands, U.S.             | 0.7766 | 0.7825 | 0.7889 | 0.7955 | 0.8021 | 0.8084 | 0.8144 | 0.8199 | 0.8250 | 0.8294 | 0.8331 | 0.8361 | 0.8388 | 0.8417 | 0.8454 | 0.8504 | 0.8554 | 0.8607 | 0.8644 | 0.8678 | 0.8710 | 0.8735 | 0.8752 | 0.8758 | 0.8764 | 0.8768 | 0.8775 |
| Andean Latin America             | 0.5238 | 0.5298 | 0.5356 | 0.5415 | 0.5478 | 0.5545 | 0.5613 | 0.5683 | 0.5753 | 0.5819 | 0.5881 | 0.5939 | 0.5996 | 0.6047 | 0.6096 | 0.6146 | 0.6198 | 0.6251 | 0.6305 | 0.6351 | 0.6396 | 0.6443 | 0.6487 | 0.6529 | 0.6572 | 0.6618 | 0.6662 |
| Bolivia                          | 0.4249 | 0.4319 | 0.4389 | 0.4459 | 0.4532 | 0.4608 | 0.4688 | 0.4767 | 0.4852 | 0.4938 | 0.5022 | 0.5104 | 0.5183 | 0.5249 | 0.5314 | 0.5387 | 0.5460 | 0.5532 | 0.5603 | 0.5668 | 0.5732 | 0.5797 | 0.5862 | 0.5925 | 0.5987 | 0.6050 | 0.6103 |
| Ecuador                          | 0.5300 | 0.5367 | 0.5435 | 0.5499 | 0.5565 | 0.5630 | 0.5694 | 0.5760 | 0.5826 | 0.5883 | 0.5935 | 0.5984 | 0.6035 | 0.6083 | 0.6134 | 0.6187 | 0.6242 | 0.6294 | 0.6350 | 0.6401 | 0.6449 | 0.6502 | 0.6554 | 0.6604 | 0.6654 | 0.6702 | 0.6743 |
| Peru                             | 0.5480 | 0.5531 | 0.5580 | 0.5631 | 0.5690 | 0.5757 | 0.5823 | 0.5896 | 0.5966 | 0.6033 | 0.6097 | 0.6154 | 0.6208 | 0.6257 | 0.6302 | 0.6344 | 0.6389 | 0.6436 | 0.6484 | 0.6522 | 0.6561 | 0.6599 | 0.6633 | 0.6664 | 0.6697 | 0.6737 | 0.6780 |
| Central Latin America            | 0.5435 | 0.5513 | 0.5599 | 0.5678 | 0.5748 | 0.5813 | 0.5882 | 0.5955 | 0.6023 | 0.6088 | 0.6154 | 0.6216 | 0.6273 | 0.6328 | 0.6389 | 0.6451 | 0.6519 | 0.6586 | 0.6651 | 0.6705 | 0.6763 | 0.6824 | 0.6887 | 0.6949 | 0.7009 | 0.7067 | 0.7113 |
| Colombia                         | 0.5503 | 0.5559 | 0.5617 | 0.5678 | 0.5744 | 0.5813 | 0.5882 | 0.5951 | 0.6011 | 0.6060 | 0.6109 | 0.6156 | 0.6200 | 0.6242 | 0.6287 | 0.6335 | 0.6391 | 0.6454 | 0.6516 | 0.6577 | 0.6643 | 0.6711 | 0.6790 | 0.6864 | 0.6937 | 0.7009 | 0.7068 |
| Costa Rica                       | 0.5700 | 0.5768 | 0.5841 | 0.5911 | 0.5976 | 0.6033 | 0.6083 | 0.6138 | 0.6202 | 0.6273 | 0.6340 | 0.6400 | 0.6456 | 0.6513 | 0.6567 | 0.6620 | 0.6677 | 0.6737 | 0.6794 | 0.6849 | 0.6910 | 0.6973 | 0.7037 | 0.7099 | 0.7159 | 0.7218 | 0.7260 |
| El Salvador                      | 0.4445 | 0.4508 | 0.4577 | 0.4650 | 0.4725 | 0.4803 | 0.4881 | 0.4961 | 0.5044 | 0.5128 | 0.5211 | 0.5292 | 0.5371 | 0.5447 | 0.5522 | 0.5598 | 0.5679 | 0.5762 | 0.5845 | 0.5922 | 0.6002 | 0.6088 | 0.6169 | 0.6246 | 0.6319 | 0.6390 | 0.6448 |
| Guatemala                        | 0.3648 | 0.3703 | 0.3763 | 0.3826 | 0.3893 | 0.3964 | 0.4040 | 0.4121 | 0.4203 | 0.4288 | 0.4376 | 0.4463 | 0.4550 | 0.4635 | 0.4718 | 0.4800 | 0.4887 | 0.4976 | 0.5063 | 0.5144 | 0.5221 | 0.5297 | 0.5367 |        |        |        |        |

Appendix Table SB. SDI Values by location, 1990-2016

| Location                        | 1990   | 1991   | 1992   | 1993   | 1994   | 1995   | 1996   | 1997   | 1998   | 1999   | 2000   | 2001   | 2002   | 2003   | 2004   | 2005   | 2006   | 2007   | 2008   | 2009     | 2010   | 2011   | 2012   | 2013   | 2014   | 2015   | 2016   |        |
|---------------------------------|--------|--------|--------|--------|--------|--------|--------|--------|--------|--------|--------|--------|--------|--------|--------|--------|--------|--------|--------|----------|--------|--------|--------|--------|--------|--------|--------|--------|
| Nayarit                         | 0.5334 | 0.5453 | 0.5574 | 0.5668 | 0.5745 | 0.5822 | 0.5916 | 0.6019 | 0.6120 | 0.6214 | 0.6304 | 0.6383 | 0.6454 | 0.6522 | 0.6585 | 0.6640 | 0.6697 | 0.6751 | 0.6794 | 0.6825   | 0.6867 | 0.6922 | 0.6983 | 0.7048 | 0.7114 | 0.7179 | 0.7233 |        |
| Nuevo Leon                      | 0.6596 | 0.6685 | 0.6779 | 0.6857 | 0.6917 | 0.6968 | 0.7027 | 0.7088 | 0.7147 | 0.7201 | 0.7251 | 0.7296 | 0.7340 | 0.7389 | 0.7440 | 0.7489 | 0.7545 | 0.7601 | 0.7646 | 0.7673   | 0.7697 | 0.7721 | 0.7746 | 0.7773 | 0.7803 | 0.7837 | 0.7869 |        |
| Oaxaca                          | 0.4464 | 0.4564 | 0.4656 | 0.4711 | 0.4738 | 0.4762 | 0.4809 | 0.4873 | 0.4941 | 0.5007 | 0.5076 | 0.5149 | 0.5234 | 0.5333 | 0.5441 | 0.5554 | 0.5679 | 0.5805 | 0.5921 | 0.6013   | 0.6093 | 0.6166 | 0.6231 | 0.6288 | 0.6341 | 0.6390 | 0.6428 |        |
| Puebla                          | 0.5046 | 0.5153 | 0.5256 | 0.5324 | 0.5368 | 0.5404 | 0.5455 | 0.5516 | 0.5581 | 0.5647 | 0.5716 | 0.5785 | 0.5860 | 0.5947 | 0.6041 | 0.6140 | 0.6252 | 0.6366 | 0.6469 | 0.6550   | 0.6622 | 0.6687 | 0.6742 | 0.6788 | 0.6833 | 0.6879 | 0.6917 |        |
| Queretaro                       | 0.5296 | 0.5401 | 0.5492 | 0.5585 | 0.5719 | 0.5893 | 0.6063 | 0.6189 | 0.6272 | 0.6362 | 0.6487 | 0.6606 | 0.6685 | 0.6730 | 0.6768 | 0.6817 | 0.6872 | 0.6927 | 0.6990 | 0.7045   | 0.7098 | 0.7154 | 0.7219 | 0.7278 | 0.7340 | 0.7397 | 0.7443 |        |
| Quintana Roo                    | 0.5756 | 0.5862 | 0.5982 | 0.6086 | 0.6174 | 0.6252 | 0.6336 | 0.6422 | 0.6504 | 0.6580 | 0.6652 | 0.6714 | 0.6771 | 0.6827 | 0.6879 | 0.6927 | 0.6980 | 0.7035 | 0.7086 | 0.7127   | 0.7179 | 0.7244 | 0.7313 | 0.7379 | 0.7441 | 0.7500 | 0.7548 |        |
| San Luis Potosi                 | 0.5002 | 0.5132 | 0.5260 | 0.5360 | 0.5439 | 0.5516 | 0.5612 | 0.5719 | 0.5827 | 0.5933 | 0.6037 | 0.6132 | 0.6222 | 0.6310 | 0.6396 | 0.6477 | 0.6563 | 0.6647 | 0.6721 | 0.6782   | 0.6852 | 0.6936 | 0.7025 | 0.7112 | 0.7196 | 0.7275 | 0.7337 |        |
| Sinaloa                         | 0.5807 | 0.5890 | 0.5973 | 0.6031 | 0.6075 | 0.6126 | 0.6202 | 0.6294 | 0.6392 | 0.6488 | 0.6579 | 0.6662 | 0.6739 | 0.6817 | 0.6893 | 0.6966 | 0.7044 | 0.7120 | 0.7183 | 0.7229   | 0.7271 | 0.7316 | 0.7360 | 0.7400 | 0.7439 | 0.7479 | 0.7513 |        |
| Sonora                          | 0.6140 | 0.6229 | 0.6324 | 0.6396 | 0.6450 | 0.6497 | 0.6558 | 0.6628 | 0.6699 | 0.6766 | 0.6833 | 0.6895 | 0.6958 | 0.7025 | 0.7093 | 0.7159 | 0.7233 | 0.7307 | 0.7371 | 0.7418   | 0.7463 | 0.7512 | 0.7563 | 0.7615 | 0.7668 | 0.7721 | 0.7767 |        |
| Tabasco                         | 0.5153 | 0.5254 | 0.5362 | 0.5445 | 0.5520 | 0.5606 | 0.5719 | 0.5844 | 0.5965 | 0.6072 | 0.6164 | 0.6239 | 0.6303 | 0.6362 | 0.6420 | 0.6476 | 0.6538 | 0.6600 | 0.6653 | 0.6693   | 0.6740 | 0.6796 | 0.6855 | 0.6910 | 0.6963 | 0.7015 | 0.7056 |        |
| Tamaulipas                      | 0.6047 | 0.6166 | 0.6287 | 0.6383 | 0.6459 | 0.6527 | 0.6601 | 0.6676 | 0.6744 | 0.6802 | 0.6853 | 0.6894 | 0.6932 | 0.6971 | 0.7014 | 0.7061 | 0.7122 | 0.7190 | 0.7257 | 0.7315   | 0.7378 | 0.7443 | 0.7505 | 0.7561 | 0.7613 | 0.7660 | 0.7699 |        |
| Tlaxcala                        | 0.5244 | 0.5329 | 0.5384 | 0.5454 | 0.5587 | 0.5728 | 0.5847 | 0.5929 | 0.5992 | 0.6051 | 0.6120 | 0.6202 | 0.6282 | 0.6354 | 0.6436 | 0.6512 | 0.6572 | 0.6641 | 0.6718 | 0.6769   | 0.6807 | 0.6854 | 0.6927 | 0.7011 | 0.7085 | 0.7147 | 0.7195 |        |
| Veracruz de Ignacio de la Llave | 0.5009 | 0.5098 | 0.5192 | 0.5261 | 0.5314 | 0.5370 | 0.5450 | 0.5545 | 0.5641 | 0.5733 | 0.5819 | 0.5897 | 0.5972 | 0.6050 | 0.6130 | 0.6208 | 0.6296 | 0.6385 | 0.6464 | 0.6526   | 0.6586 | 0.6647 | 0.6703 | 0.6754 | 0.6804 | 0.6855 | 0.6897 |        |
| Yucatan                         | 0.5447 | 0.5548 | 0.5657 | 0.5747 | 0.5824 | 0.5899 | 0.5986 | 0.6080 | 0.6171 | 0.6254 | 0.6334 | 0.6406 | 0.6474 | 0.6542 | 0.6608 | 0.6670 | 0.6736 | 0.6800 | 0.6854 | 0.6892   | 0.6930 | 0.6972 | 0.7014 | 0.7057 | 0.7101 | 0.7147 | 0.7187 |        |
| Zacatecas                       | 0.4980 | 0.5120 | 0.5259 | 0.5369 | 0.5458 | 0.5541 | 0.5635 | 0.5736 | 0.5833 | 0.5924 | 0.6009 | 0.6085 | 0.6155 | 0.6223 | 0.6289 | 0.6348 | 0.6410 | 0.6470 | 0.6520 | 0.6556   | 0.6602 | 0.6660 | 0.6722 | 0.6788 | 0.6857 | 0.6927 | 0.6986 |        |
| Tropical Latin America          | 0.5390 | 0.5463 | 0.5531 | 0.5603 | 0.5677 | 0.5757 | 0.5835 | 0.5909 | 0.5984 | 0.6054 | 0.6129 | 0.6197 | 0.6259 | 0.6315 | 0.6370 | 0.6425 | 0.6482 | 0.6542 | 0.6604 | 0.6661   | 0.6723 | 0.6786 | 0.6845 | 0.6903 | 0.6965 | 0.7024 | 0.7071 |        |
| Brazil                          | 0.5402 | 0.5476 | 0.5544 | 0.5613 | 0.5691 | 0.5771 | 0.5849 | 0.5924 | 0.5998 | 0.6069 | 0.6143 | 0.6212 | 0.6273 | 0.6329 | 0.6384 | 0.6438 | 0.6495 | 0.6555 | 0.6616 | 0.6673   | 0.6734 | 0.6797 | 0.6855 | 0.6913 | 0.6974 | 0.7033 | 0.7099 |        |
| Paraguay                        | 0.4732 | 0.4783 | 0.4837 | 0.4898 | 0.4964 | 0.5036 | 0.5111 | 0.5192 | 0.5273 | 0.5353 | 0.5426 | 0.5498 | 0.5575 | 0.5655 | 0.5731 | 0.5802 | 0.5877 | 0.5958 | 0.6039 | 0.6110   | 0.6195 | 0.6280 | 0.6358 | 0.6446 | 0.6531 | 0.6613 | 0.6678 |        |
| Acre                            | 0.4490 | 0.4590 | 0.4665 | 0.4743 | 0.4831 | 0.4916 | 0.5007 | 0.5092 | 0.5166 | 0.5222 | 0.5282 | 0.5337 | 0.5386 | 0.5433 | 0.5485 | 0.5551 | 0.5626 | 0.5702 | 0.5782 | 0.5863   | 0.5948 | 0.6037 | 0.6123 | 0.6205 | 0.6286 | 0.6359 | 0.6416 |        |
| Alagoas                         | 0.4056 | 0.4140 | 0.4224 | 0.4314 | 0.4413 | 0.4515 | 0.4613 | 0.4695 | 0.4775 | 0.4852 | 0.4932 | 0.5007 | 0.5079 | 0.5149 | 0.5219 | 0.5289 | 0.5364 | 0.5444 | 0.5526 | 0.5603   | 0.5685 | 0.5768 | 0.5844 | 0.5917 | 0.5984 | 0.6049 | 0.6098 |        |
| Amazonas                        | 0.4862 | 0.4971 | 0.5056 | 0.5134 | 0.5226 | 0.5336 | 0.5438 | 0.5519 | 0.5601 | 0.5690 | 0.5784 | 0.5857 | 0.5917 | 0.5972 | 0.6030 | 0.6089 | 0.6152 | 0.6225 | 0.6301 | 0.6372   | 0.6448 | 0.6523 | 0.6594 | 0.6663 | 0.6735 | 0.6804 | 0.6858 |        |
| Amapa                           | 0.4774 | 0.4864 | 0.4941 | 0.5013 | 0.5088 | 0.5175 | 0.5279 | 0.5402 | 0.5543 | 0.5672 | 0.5773 | 0.5857 | 0.5939 | 0.6026 | 0.6109 | 0.6173 | 0.6233 | 0.6301 | 0.6377 | 0.6449   | 0.6523 | 0.6597 | 0.6655 | 0.6703 | 0.6748 | 0.6795 | 0.6838 |        |
| Bahia                           | 0.4469 | 0.4559 | 0.4638 | 0.4719 | 0.4806 | 0.4900 | 0.4985 | 0.5071 | 0.5166 | 0.5243 | 0.5318 | 0.5388 | 0.5452 | 0.5515 | 0.5580 | 0.5643 | 0.5709 | 0.5776 | 0.5845 | 0.5910   | 0.5982 | 0.6057 | 0.6128 | 0.6198 | 0.6268 | 0.6332 | 0.6383 |        |
| Ceara                           | 0.4391 | 0.4480 | 0.4551 | 0.4631 | 0.4717 | 0.4814 | 0.4916 | 0.5006 | 0.5088 | 0.5162 | 0.5233 | 0.5305 | 0.5376 | 0.5446 | 0.5515 | 0.5583 | 0.5655 | 0.5730 | 0.5808 | 0.5881   | 0.5961 | 0.6041 | 0.6115 | 0.6186 | 0.6257 | 0.6320 | 0.6371 |        |
| Distrito Federal                | 0.6799 | 0.6859 | 0.6917 | 0.6984 | 0.7044 | 0.7101 | 0.7165 | 0.7230 | 0.7293 | 0.7353 | 0.7410 | 0.7472 | 0.7530 | 0.7582 | 0.7636 | 0.7691 | 0.7749 | 0.7811 | 0.7874 | 0.7933   | 0.7998 | 0.8063 | 0.8122 | 0.8179 | 0.8236 | 0.8288 | 0.8324 |        |
| Espirito Santo                  | 0.5527 | 0.5605 | 0.5684 | 0.5767 | 0.5842 | 0.5922 | 0.6000 | 0.6070 | 0.6141 | 0.6211 | 0.6281 | 0.6352 | 0.6421 | 0.6482 | 0.6541 | 0.6596 | 0.6652 | 0.6709 | 0.6766 | 0.6819   | 0.6877 | 0.6937 | 0.6993 | 0.7048 | 0.7109 | 0.7168 | 0.7214 |        |
| Goias                           | 0.5111 | 0.5199 | 0.5282 | 0.5367 | 0.5457 | 0.5554 | 0.5649 | 0.5736 | 0.5823 | 0.5901 | 0.5972 | 0.6041 | 0.6105 | 0.6165 | 0.6225 | 0.6285 | 0.6346 | 0.6408 | 0.6469 | 0.6525   | 0.6586 | 0.6647 | 0.6703 | 0.6760 | 0.6823 | 0.6885 | 0.6934 |        |
| Maranhao                        | 0.3798 | 0.3867 | 0.3933 | 0.4028 | 0.4129 | 0.4238 | 0.4353 | 0.4459 | 0.4571 | 0.4682 | 0.4789 | 0.4880 | 0.4958 | 0.5035 | 0.5105 | 0.5173 | 0.5246 | 0.5325 | 0.5408 | 0.5487   | 0.5571 | 0.5656 | 0.5735 | 0.5809 | 0.5884 | 0.5952 | 0.6005 |        |
| Minas Gerais                    | 0.5389 | 0.5457 | 0.5523 | 0.5590 | 0.5660 | 0.5738 | 0.5815 | 0.5891 | 0.5964 | 0.6030 | 0.6092 | 0.6161 | 0.6214 | 0.6269 | 0.6324 | 0.6378 | 0.6435 | 0.6495 | 0.6557 | 0.6614   | 0.6675 | 0.6738 | 0.6797 | 0.6855 | 0.6915 | 0.6971 | 0.7016 |        |
| Mato Grosso do Sul              | 0.5141 | 0.5218 | 0.5299 | 0.5392 | 0.5481 | 0.5576 | 0.5672 | 0.5759 | 0.5841 | 0.5913 | 0.5979 | 0.6043 | 0.6101 | 0.6151 | 0.6204 | 0.6261 | 0.6320 | 0.6378 | 0.6435 | 0.6487   | 0.6541 | 0.6594 | 0.6644 | 0.6694 | 0.6753 | 0.6814 | 0.6863 |        |
| Mato Grosso                     | 0.5238 | 0.5318 | 0.5399 | 0.5492 | 0.5592 | 0.5693 | 0.5783 | 0.5867 | 0.5950 | 0.6022 | 0.6087 | 0.6154 | 0.6211 | 0.6259 | 0.6309 | 0.6361 | 0.6417 | 0.6474 | 0.6532 | 0.6585   | 0.6641 | 0.6697 | 0.6751 | 0.6803 | 0.6868 | 0.6934 | 0.6985 |        |
| Para                            | 0.4509 | 0.4582 | 0.4650 | 0.4733 | 0.4828 | 0.4932 | 0.5029 | 0.5107 | 0.5189 | 0.5262 | 0.5322 | 0.5371 | 0.5411 | 0.5448 | 0.5492 | 0.5541 | 0.5598 | 0.5645 | 0.5693 | 0.5739   | 0.5813 | 0.5892 | 0.5974 | 0.6049 | 0.6119 | 0.6188 | 0.6251 | 0.6301 |
| Paraiba                         | 0.4359 | 0.4444 | 0.4509 | 0.4590 | 0.4672 | 0.4764 | 0.4860 | 0.4948 | 0.5035 | 0.5116 | 0.5192 | 0.5265 | 0.5334 | 0.5399 | 0.5463 | 0.5527 | 0.5595 | 0.5666 | 0.5741 | 0.5811   | 0.5886 | 0.5963 | 0.6033 | 0.6098 | 0.6164 | 0.6223 | 0.6270 |        |
| Parana                          | 0.5485 | 0.5563 | 0.5640 | 0.5721 | 0.5804 | 0.5890 | 0.5975 | 0.6058 | 0.6140 | 0.6216 | 0.6289 | 0.6361 | 0.6429 | 0.6488 | 0.6544 | 0.6597 | 0.6653 | 0.6710 | 0.6769 | 0.6822   | 0.6880 | 0.6942 | 0.6999 | 0.7057 | 0.7118 | 0.7176 | 0.7222 |        |
| Pernambuco                      | 0.4677 | 0.4770 | 0.4846 | 0.4924 | 0.5001 | 0.5078 | 0.5160 | 0.5231 | 0.5298 | 0.5361 | 0.5427 | 0.5491 | 0.5553 | 0.5612 | 0.5672 | 0.5730 | 0.5791 | 0.5854 | 0.5919 | 0.5980   | 0.6046 | 0.6112 | 0.6173 | 0.6234 | 0.6297 | 0.6357 | 0.6404 |        |
| Piaui                           | 0.4076 | 0.4152 | 0.4211 | 0.4284 | 0.4363 | 0.4449 | 0.4547 | 0.4644 | 0.4735 | 0.4819 | 0.4902 | 0.4980 | 0.5055 | 0.5125 | 0.5192 | 0.5257 | 0.5329 | 0.5405 | 0.5482 | 0.5553   | 0.5629 | 0.5706 | 0.5778 | 0.5846 | 0.5914 | 0.5976 | 0.6025 |        |
| Rio de Janeiro                  | 0.6204 | 0.6259 | 0.6311 | 0.6365 | 0.6420 | 0.6476 | 0.6533 | 0.6589 | 0.6645 | 0.6701 | 0.6763 | 0.6823 | 0.6876 | 0.6920 | 0.6965 | 0.7008 | 0.7051 | 0.7097 | 0.7144 | 0.7184   | 0.7229 | 0.7274 | 0.7315 | 0.7356 | 0.7403 | 0.7451 | 0.7491 |        |
| Rio Grande do Norte             | 0.4610 | 0.4694 | 0.4770 | 0.4853 | 0.4939 | 0.5038 | 0.5151 | 0.5237 | 0.5309 | 0.5387 | 0.5465 | 0.5542 | 0.5615 | 0.5684 | 0.5753 | 0.5819 | 0.5887 | 0.5959 | 0.6033 | 0.6102   | 0.6177 | 0.6253 | 0.6322 | 0.6386 | 0.6454 | 0.6514 | 0.6562 |        |
| Rondonia                        | 0.4770 | 0.4860 | 0.4941 | 0.5021 | 0.5107 | 0.5195 | 0.5279 | 0.5362 | 0.5446 | 0.5524 | 0.5602 | 0.5680 | 0.5752 | 0.5821 | 0.5893 | 0.5966 | 0.6042 | 0.6118 | 0.6192 | 0.6258</ |        |        |        |        |        |        |        |        |

Appendix Table SB. SDI Values by location, 1990-2016

| Location             | 1990   | 1991   | 1992   | 1993   | 1994   | 1995   | 1996   | 1997   | 1998   | 1999   | 2000   | 2001   | 2002   | 2003   | 2004   | 2005   | 2006   | 2007   | 2008   | 2009   | 2010   | 2011   | 2012   | 2013   | 2014   | 2015   | 2016   |        |
|----------------------|--------|--------|--------|--------|--------|--------|--------|--------|--------|--------|--------|--------|--------|--------|--------|--------|--------|--------|--------|--------|--------|--------|--------|--------|--------|--------|--------|--------|
| Syria                | 0.3756 | 0.3857 | 0.3967 | 0.4077 | 0.4186 | 0.4295 | 0.4406 | 0.4513 | 0.4622 | 0.4725 | 0.4827 | 0.4929 | 0.5035 | 0.5138 | 0.5249 | 0.5372 | 0.5490 | 0.5604 | 0.5714 | 0.5823 | 0.5932 | 0.6030 | 0.6111 | 0.6181 | 0.6251 | 0.6320 | 0.6378 |        |
| Tunisia              | 0.4755 | 0.4886 | 0.5017 | 0.5146 | 0.5270 | 0.5388 | 0.5510 | 0.5626 | 0.5731 | 0.5827 | 0.5912 | 0.5991 | 0.6058 | 0.6120 | 0.6149 | 0.6233 | 0.6289 | 0.6347 | 0.6404 | 0.6463 | 0.6527 | 0.6592 | 0.6667 | 0.6745 | 0.6823 | 0.6899 | 0.6962 |        |
| Turkey               | 0.5760 | 0.5844 | 0.5921 | 0.5995 | 0.6054 | 0.6117 | 0.6189 | 0.6266 | 0.6342 | 0.6413 | 0.6491 | 0.6563 | 0.6634 | 0.6699 | 0.6767 | 0.6836 | 0.6907 | 0.6978 | 0.7050 | 0.7109 | 0.7173 | 0.7242 | 0.7310 | 0.7381 | 0.7458 | 0.7543 | 0.7617 |        |
| United Arab Emirates | 0.5568 | 0.5739 | 0.5902 | 0.6058 | 0.6200 | 0.6329 | 0.6445 | 0.6559 | 0.6669 | 0.6770 | 0.6861 | 0.6950 | 0.7031 | 0.7101 | 0.7160 | 0.7207 | 0.7251 | 0.7286 | 0.7319 | 0.7357 | 0.7401 | 0.7452 | 0.7507 | 0.7563 | 0.7620 | 0.7676 | 0.7716 |        |
| Yemen                | 0.1731 | 0.1769 | 0.1847 | 0.1945 | 0.2055 | 0.2166 | 0.2286 | 0.2405 | 0.2525 | 0.2640 | 0.2757 | 0.2881 | 0.3015 | 0.3173 | 0.3345 | 0.3505 | 0.3616 | 0.3673 | 0.3711 | 0.3741 | 0.3790 | 0.3855 | 0.3979 | 0.4166 | 0.4341 | 0.4449 | 0.4504 |        |
| Afghanistan          | 0.1578 | 0.1603 | 0.1634 | 0.1652 | 0.1652 | 0.1659 | 0.1664 | 0.1669 | 0.1676 | 0.1686 | 0.1700 | 0.1708 | 0.1751 | 0.1812 | 0.1878 | 0.1953 | 0.2029 | 0.2115 | 0.2196 | 0.2290 | 0.2383 | 0.2466 | 0.2548 | 0.2624 | 0.2693 | 0.2758 | 0.2810 |        |
| Sudan                | 0.2948 | 0.2998 | 0.3045 | 0.3089 | 0.3127 | 0.3166 | 0.3204 | 0.3260 | 0.3322 | 0.3403 | 0.3507 | 0.3612 | 0.3718 | 0.3825 | 0.3933 | 0.4039 | 0.4150 | 0.4263 | 0.4373 | 0.4481 | 0.4588 | 0.4702 | 0.4802 | 0.4904 | 0.5005 | 0.5105 | 0.5185 |        |
| Ha'il                | 0.3551 | 0.3693 | 0.3839 | 0.3988 | 0.4138 | 0.4292 | 0.4457 | 0.4625 | 0.4795 | 0.4965 | 0.5140 | 0.5317 | 0.5493 | 0.5670 | 0.5849 | 0.6027 | 0.6207 | 0.6386 | 0.6571 | 0.6743 | 0.6912 | 0.7078 | 0.7239 | 0.7389 | 0.7524 | 0.7649 | 0.7739 |        |
| Qassim               | 0.3414 | 0.3572 | 0.3730 | 0.3888 | 0.4050 | 0.4216 | 0.4394 | 0.4576 | 0.4763 | 0.4953 | 0.5146 | 0.5342 | 0.5538 | 0.5729 | 0.5917 | 0.6101 | 0.6287 | 0.6471 | 0.6655 | 0.6838 | 0.7013 | 0.7173 | 0.7330 | 0.7482 | 0.7623 | 0.7757 | 0.7851 |        |
| Riyadh               | 0.3692 | 0.3847 | 0.4005 | 0.4171 | 0.4340 | 0.4511 | 0.4685 | 0.4864 | 0.5048 | 0.5235 | 0.5428 | 0.5617 | 0.5804 | 0.5992 | 0.6181 | 0.6373 | 0.6562 | 0.6747 | 0.6934 | 0.7107 | 0.7273 | 0.7419 | 0.7558 | 0.7690 | 0.7826 | 0.7953 | 0.8044 |        |
| Tabuk                | 0.3615 | 0.3758 | 0.3906 | 0.4059 | 0.4216 | 0.4376 | 0.4542 | 0.4713 | 0.4888 | 0.5066 | 0.5251 | 0.5434 | 0.5616 | 0.5799 | 0.5984 | 0.6197 | 0.6401 | 0.6594 | 0.6783 | 0.6954 | 0.7116 | 0.7286 | 0.7449 | 0.7600 | 0.7753 | 0.7897 | 0.7999 |        |
| Madinah              | 0.3621 | 0.3770 | 0.3924 | 0.4080 | 0.4237 | 0.4397 | 0.4568 | 0.4744 | 0.4921 | 0.5100 | 0.5284 | 0.5466 | 0.5647 | 0.5830 | 0.6015 | 0.6197 | 0.6382 | 0.6564 | 0.6752 | 0.6927 | 0.7098 | 0.7272 | 0.7439 | 0.7595 | 0.7733 | 0.7862 | 0.7955 |        |
| Makkah               | 0.3816 | 0.3962 | 0.4114 | 0.4268 | 0.4422 | 0.4578 | 0.4744 | 0.4913 | 0.5083 | 0.5253 | 0.5428 | 0.5601 | 0.5770 | 0.5941 | 0.6114 | 0.6281 | 0.6451 | 0.6617 | 0.6789 | 0.6948 | 0.7102 | 0.7261 | 0.7413 | 0.7553 | 0.7677 | 0.7792 | 0.7876 |        |
| Bahah                | 0.3511 | 0.3642 | 0.3780 | 0.3919 | 0.4060 | 0.4203 | 0.4360 | 0.4519 | 0.4678 | 0.4837 | 0.5000 | 0.5164 | 0.5324 | 0.5488 | 0.5654 | 0.5822 | 0.5994 | 0.6164 | 0.6340 | 0.6503 | 0.6665 | 0.6829 | 0.6987 | 0.7135 | 0.7258 | 0.7372 | 0.7455 |        |
| Northern Borders     | 0.4057 | 0.4197 | 0.4344 | 0.4496 | 0.4650 | 0.4804 | 0.4965 | 0.5130 | 0.5296 | 0.5462 | 0.5632 | 0.5798 | 0.5959 | 0.6122 | 0.6287 | 0.6470 | 0.6646 | 0.6812 | 0.6979 | 0.7130 | 0.7275 | 0.7415 | 0.7547 | 0.7665 | 0.7786 | 0.7900 | 0.7968 |        |
| Jawf                 | 0.4144 | 0.4309 | 0.4479 | 0.4649 | 0.4820 | 0.4991 | 0.5174 | 0.5359 | 0.5545 | 0.5730 | 0.5916 | 0.6099 | 0.6277 | 0.6455 | 0.6633 | 0.6812 | 0.6992 | 0.7169 | 0.7349 | 0.7515 | 0.7676 | 0.7837 | 0.7992 | 0.8136 | 0.8260 | 0.8376 | 0.8464 |        |
| Jizan                | 0.3063 | 0.3171 | 0.3287 | 0.3405 | 0.3527 | 0.3651 | 0.3788 | 0.3927 | 0.4068 | 0.4209 | 0.4356 | 0.4504 | 0.4652 | 0.4804 | 0.4961 | 0.5125 | 0.5295 | 0.5464 | 0.5642 | 0.5805 | 0.5968 | 0.6136 | 0.6299 | 0.6462 | 0.6620 | 0.6780 | 0.6901 | 0.6960 |
| 'Asir                | 0.3143 | 0.3275 | 0.3412 | 0.3551 | 0.3694 | 0.3842 | 0.4006 | 0.4172 | 0.4341 | 0.4510 | 0.4685 | 0.4865 | 0.5044 | 0.5225 | 0.5408 | 0.5593 | 0.5785 | 0.5975 | 0.6173 | 0.6359 | 0.6542 | 0.6723 | 0.6898 | 0.7065 | 0.7210 | 0.7346 | 0.7441 |        |
| Najran               | 0.3088 | 0.3203 | 0.3324 | 0.3448 | 0.3575 | 0.3706 | 0.3851 | 0.4000 | 0.4152 | 0.4306 | 0.4466 | 0.4631 | 0.4794 | 0.4961 | 0.5131 | 0.5304 | 0.5483 | 0.5662 | 0.5849 | 0.6025 | 0.6198 | 0.6373 | 0.6544 | 0.6708 | 0.6855 | 0.6994 | 0.7093 |        |
| Eastern Province     | 0.3775 | 0.3929 | 0.4089 | 0.4258 | 0.4412 | 0.4577 | 0.4751 | 0.4929 | 0.5110 | 0.5291 | 0.5478 | 0.5663 | 0.5844 | 0.6027 | 0.6211 | 0.6393 | 0.6576 | 0.6766 | 0.6941 | 0.7113 | 0.7280 | 0.7448 | 0.7610 | 0.7768 | 0.7901 | 0.8031 | 0.8126 |        |
| South Asia           | 0.3490 | 0.3565 | 0.3639 | 0.3711 | 0.3785 | 0.3861 | 0.3940 | 0.4017 | 0.4095 | 0.4173 | 0.4248 | 0.4323 | 0.4398 | 0.4474 | 0.4554 | 0.4638 | 0.4726 | 0.4819 | 0.4909 | 0.5000 | 0.5095 | 0.5193 | 0.5290 | 0.5391 | 0.5495 | 0.5603 | 0.5693 |        |
| South Asia           | 0.3490 | 0.3565 | 0.3639 | 0.3711 | 0.3785 | 0.3861 | 0.3940 | 0.4017 | 0.4095 | 0.4173 | 0.4248 | 0.4323 | 0.4398 | 0.4474 | 0.4554 | 0.4638 | 0.4726 | 0.4819 | 0.4909 | 0.5000 | 0.5095 | 0.5193 | 0.5290 | 0.5391 | 0.5495 | 0.5603 | 0.5693 |        |
| Bangladesh           | 0.3146 | 0.3226 | 0.3310 | 0.3394 | 0.3474 | 0.3552 | 0.3628 | 0.3701 | 0.3771 | 0.3836 | 0.3898 | 0.3958 | 0.4016 | 0.4074 | 0.4135 | 0.4200 | 0.4269 | 0.4344 | 0.4423 | 0.4504 | 0.4586 | 0.4673 | 0.4759 | 0.4847 | 0.4936 | 0.5029 | 0.5109 |        |
| Bhutan               | 0.3014 | 0.3096 | 0.3180 | 0.3270 | 0.3368 | 0.3476 | 0.3588 | 0.3704 | 0.3822 | 0.3939 | 0.4059 | 0.4184 | 0.4315 | 0.4445 | 0.4572 | 0.4697 | 0.4815 | 0.4940 | 0.5061 | 0.5178 | 0.5295 | 0.5412 | 0.5525 | 0.5626 | 0.5721 | 0.5814 | 0.5884 |        |
| India                | 0.3570 | 0.3641 | 0.3712 | 0.3782 | 0.3854 | 0.3929 | 0.4007 | 0.4084 | 0.4161 | 0.4240 | 0.4317 | 0.4396 | 0.4473 | 0.4553 | 0.4636 | 0.4726 | 0.4821 | 0.4921 | 0.5019 | 0.5118 | 0.5222 | 0.5326 | 0.5430 | 0.5535 | 0.5642 | 0.5752 | 0.5844 |        |
| Nepal                | 0.2423 | 0.2497 | 0.2578 | 0.2664 | 0.2756 | 0.2846 | 0.2932 | 0.3017 | 0.3102 | 0.3189 | 0.3278 | 0.3369 | 0.3455 | 0.3539 | 0.3621 | 0.3696 | 0.3769 | 0.3840 | 0.3911 | 0.3979 | 0.4043 | 0.4105 | 0.4171 | 0.4243 | 0.4332 | 0.4433 | 0.4522 |        |
| Pakistan             | 0.2966 | 0.3089 | 0.3195 | 0.3296 | 0.3394 | 0.3493 | 0.3601 | 0.3715 | 0.3828 | 0.3924 | 0.4005 | 0.4083 | 0.4161 | 0.4236 | 0.4309 | 0.4375 | 0.4432 | 0.4484 | 0.4534 | 0.4585 | 0.4640 | 0.4705 | 0.4782 | 0.4877 | 0.4985 | 0.5100 | 0.5190 |        |
| Andhra Pradesh       | 0.3294 | 0.3373 | 0.3448 | 0.3536 | 0.3628 | 0.3727 | 0.3832 | 0.3929 | 0.4035 | 0.4139 | 0.4245 | 0.4345 | 0.4437 | 0.4531 | 0.4625 | 0.4716 | 0.4814 | 0.4926 | 0.5035 | 0.5140 | 0.5251 | 0.5361 | 0.5462 | 0.5563 | 0.5664 | 0.5768 | 0.5853 |        |
| Arunachal Pradesh    | 0.3296 | 0.3376 | 0.3456 | 0.3541 | 0.3619 | 0.3710 | 0.3796 | 0.3886 | 0.3972 | 0.4052 | 0.4132 | 0.4220 | 0.4302 | 0.4384 | 0.4475 | 0.4568 | 0.4663 | 0.4768 | 0.4867 | 0.4972 | 0.5083 | 0.5198 | 0.5322 | 0.5452 | 0.5582 | 0.5710 | 0.5889 |        |
| Assam                | 0.3607 | 0.3671 | 0.3728 | 0.3780 | 0.3833 | 0.3889 | 0.3945 | 0.3999 | 0.4055 | 0.4131 | 0.4210 | 0.4289 | 0.4373 | 0.4456 | 0.4541 | 0.4622 | 0.4708 | 0.4794 | 0.4875 | 0.4955 | 0.5045 | 0.5136 | 0.5226 | 0.5320 | 0.5419 | 0.5524 | 0.5616 |        |
| Bihar                | 0.3062 | 0.3116 | 0.3167 | 0.3183 | 0.3189 | 0.3178 | 0.3179 | 0.3189 | 0.3173 | 0.3169 | 0.3184 | 0.3206 | 0.3248 | 0.3286 | 0.3337 | 0.3382 | 0.3459 | 0.3539 | 0.3630 | 0.3708 | 0.3801 | 0.3899 | 0.4004 | 0.4108 | 0.4208 | 0.4309 | 0.4398 |        |
| Chhattisgarh         | 0.3042 | 0.3102 | 0.3163 | 0.3226 | 0.3292 | 0.3363 | 0.3437 | 0.3516 | 0.3597 | 0.3685 | 0.3764 | 0.3856 | 0.3945 | 0.4045 | 0.4144 | 0.4248 | 0.4363 | 0.4487 | 0.4615 | 0.4733 | 0.4846 | 0.4967 | 0.5088 | 0.5211 | 0.5339 | 0.5470 | 0.5575 |        |
| Delhi                | 0.5240 | 0.5287 | 0.5330 | 0.5379 | 0.5441 | 0.5504 | 0.5567 | 0.5651 | 0.5734 | 0.5823 | 0.5923 | 0.6022 | 0.6123 | 0.6225 | 0.6328 | 0.6431 | 0.6534 | 0.6638 | 0.6738 | 0.6844 | 0.6945 | 0.7047 | 0.7145 | 0.7244 | 0.7344 | 0.7445 | 0.7516 |        |
| Goa                  | 0.4730 | 0.4814 | 0.4900 | 0.5001 | 0.5108 | 0.5225 | 0.5351 | 0.5467 | 0.5605 | 0.5732 | 0.5856 | 0.5969 | 0.6076 | 0.6157 | 0.6228 | 0.6306 | 0.6381 | 0.6448 | 0.6537 | 0.6637 | 0.6733 | 0.6856 | 0.6964 | 0.7069 | 0.7180 | 0.7291 | 0.7384 |        |
| Gujarat              | 0.3886 | 0.3952 | 0.4032 | 0.4109 | 0.4202 | 0.4293 | 0.4389 | 0.4478 | 0.4570 | 0.4655 | 0.4728 | 0.4800 | 0.4872 | 0.4953 | 0.5032 | 0.5124 | 0.5220 | 0.5322 | 0.5415 | 0.5511 | 0.5609 | 0.5705 | 0.5797 | 0.5886 | 0.5977 | 0.6072 | 0.6151 |        |
| Haryana              | 0.3953 | 0.4049 | 0.4133 | 0.4220 | 0.4308 | 0.4394 | 0.4489 | 0.4580 | 0.4667 | 0.4754 | 0.4845 | 0.4939 | 0.5035 | 0.5134 | 0.5236 | 0.5342 | 0.5454 | 0.5570 | 0.5685 | 0.5799 | 0.5912 | 0.6024 | 0.6131 | 0.6238 | 0.6346 | 0.6457 | 0.6550 |        |
| Himachal Pradesh     | 0.3743 | 0.3848 | 0.3958 | 0.4069 | 0.4186 | 0.4301 | 0.4432 | 0.4560 | 0.4688 | 0.4826 | 0.4959 | 0.5082 | 0.5197 | 0.5306 | 0.5415 | 0.5525 | 0.5641 | 0.5753 | 0.5867 | 0.5979 | 0.6099 | 0.6217 | 0.6330 | 0.6439 | 0.6542 | 0.6619 | 0.6694 |        |
| Jammu and Kashmir    | 0.3427 | 0.3486 | 0.3531 | 0.3611 | 0.3688 | 0.3769 | 0.3844 | 0.3955 | 0.4052 | 0.4173 | 0.4292 | 0.4407 | 0.4524 | 0.4637 | 0.4743 | 0.4861 | 0.4972 | 0.5075 | 0.5181 | 0.5284 | 0.5386 | 0.5491 | 0.5592 | 0.5692 | 0.5792 | 0.5892 | 0.5977 |        |
| Jharkhand            | 0.3003 | 0.3056 | 0.3109 | 0.3164 | 0.3223 | 0.3288 | 0.3345 | 0.3419 | 0.3497 | 0.3580 | 0.3653 | 0.3733 | 0.3813 | 0.3888 | 0.3973 | 0.4059 | 0.4145 | 0.4242 | 0.4329 | 0.4424 | 0.4533 | 0.46   |        |        |        |        |        |        |

Appendix Table SB. SDI Values by location, 1990-2016

| Location                 | 1990   | 1991   | 1992   | 1993   | 1994   | 1995   | 1996   | 1997   | 1998   | 1999   | 2000   | 2001   | 2002   | 2003   | 2004   | 2005   | 2006   | 2007   | 2008   | 2009   | 2010   | 2011   | 2012   | 2013   | 2014   | 2015   | 2016   |
|--------------------------|--------|--------|--------|--------|--------|--------|--------|--------|--------|--------|--------|--------|--------|--------|--------|--------|--------|--------|--------|--------|--------|--------|--------|--------|--------|--------|--------|
| Arunachal Pradesh, Rural | 0.3092 | 0.3161 | 0.3232 | 0.3307 | 0.3376 | 0.3456 | 0.3533 | 0.3613 | 0.3691 | 0.3764 | 0.3838 | 0.3923 | 0.4006 | 0.4091 | 0.4187 | 0.4285 | 0.4384 | 0.4495 | 0.4602 | 0.4738 | 0.4876 | 0.5014 | 0.5147 | 0.5279 | 0.5410 | 0.5540 | 0.5647 |
| Assam, Urban             | 0.4994 | 0.5036 | 0.5080 | 0.5132 | 0.5188 | 0.5247 | 0.5305 | 0.5360 | 0.5413 | 0.5488 | 0.5564 | 0.5637 | 0.5714 | 0.5786 | 0.5858 | 0.5924 | 0.5994 | 0.6060 | 0.6119 | 0.6175 | 0.6240 | 0.6305 | 0.6364 | 0.6426 | 0.6495 | 0.6567 | 0.6634 |
| Assam, Rural             | 0.3415 | 0.3479 | 0.3534 | 0.3583 | 0.3632 | 0.3684 | 0.3736 | 0.3787 | 0.3840 | 0.3913 | 0.3989 | 0.4066 | 0.4149 | 0.4232 | 0.4317 | 0.4399 | 0.4486 | 0.4573 | 0.4656 | 0.4738 | 0.4829 | 0.4923 | 0.5015 | 0.5111 | 0.5215 | 0.5324 | 0.5419 |
| Bihar, Urban             | 0.4412 | 0.4472 | 0.4530 | 0.4562 | 0.4591 | 0.4603 | 0.4629 | 0.4664 | 0.4667 | 0.4680 | 0.4712 | 0.4744 | 0.4788 | 0.4823 | 0.4868 | 0.4906 | 0.4978 | 0.5050 | 0.5134 | 0.5205 | 0.5288 | 0.5373 | 0.5459 | 0.5540 | 0.5614 | 0.5683 | 0.5746 |
| Bihar, Rural             | 0.2813 | 0.2865 | 0.2916 | 0.2952 | 0.2944 | 0.2939 | 0.2945 | 0.2959 | 0.2950 | 0.2950 | 0.2969 | 0.2992 | 0.3038 | 0.3077 | 0.3128 | 0.3173 | 0.3249 | 0.3328 | 0.3417 | 0.3495 | 0.3587 | 0.3684 | 0.3789 | 0.3894 | 0.3996 | 0.4099 | 0.4190 |
| Chhattisgarh, Urban      | 0.5000 | 0.5034 | 0.5067 | 0.5101 | 0.5135 | 0.5169 | 0.5214 | 0.5271 | 0.5326 | 0.5386 | 0.5433 | 0.5501 | 0.5571 | 0.5650 | 0.5723 | 0.5806 | 0.5902 | 0.6006 | 0.6112 | 0.6203 | 0.6285 | 0.6372 | 0.6452 | 0.6528 | 0.6611 | 0.6694 | 0.6767 |
| Chhattisgarh, Rural      | 0.2509 | 0.2574 | 0.2639 | 0.2707 | 0.2779 | 0.2857 | 0.2936 | 0.3018 | 0.3102 | 0.3194 | 0.3277 | 0.3370 | 0.3458 | 0.3557 | 0.3654 | 0.3756 | 0.3869 | 0.3991 | 0.4117 | 0.4236 | 0.4352 | 0.4478 | 0.4606 | 0.4739 | 0.4878 | 0.5021 | 0.5135 |
| Delhi, Urban             | 0.5305 | 0.5350 | 0.5388 | 0.5433 | 0.5490 | 0.5549 | 0.5610 | 0.5693 | 0.5775 | 0.5862 | 0.5961 | 0.6059 | 0.6157 | 0.6256 | 0.6356 | 0.6456 | 0.6557 | 0.6658 | 0.6757 | 0.6861 | 0.6959 | 0.7060 | 0.7159 | 0.7257 | 0.7357 | 0.7458 | 0.7530 |
| Delhi, Rural             | 0.4570 | 0.4642 | 0.4706 | 0.4767 | 0.4832 | 0.4900 | 0.4967 | 0.5054 | 0.5147 | 0.5247 | 0.5356 | 0.5468 | 0.5579 | 0.5692 | 0.5803 | 0.5914 | 0.6025 | 0.6136 | 0.6243 | 0.6356 | 0.6465 | 0.6579 | 0.6692 | 0.6807 | 0.6920 | 0.7034 | 0.7130 |
| Goa, Urban               | 0.5200 | 0.5265 | 0.5332 | 0.5414 | 0.5505 | 0.5608 | 0.5720 | 0.5823 | 0.5946 | 0.6057 | 0.6164 | 0.6262 | 0.6355 | 0.6421 | 0.6477 | 0.6541 | 0.6601 | 0.6651 | 0.6725 | 0.6812 | 0.6897 | 0.7011 | 0.7113 | 0.7213 | 0.7324 | 0.7436 | 0.7528 |
| Goa, Rural               | 0.4409 | 0.4494 | 0.4581 | 0.4682 | 0.4789 | 0.4906 | 0.5031 | 0.5148 | 0.5287 | 0.5416 | 0.5544 | 0.5660 | 0.5767 | 0.5850 | 0.5923 | 0.6004 | 0.6083 | 0.6156 | 0.6252 | 0.6356 | 0.6456 | 0.6579 | 0.6685 | 0.6787 | 0.6898 | 0.7007 | 0.7101 |
| Gujarat, Urban           | 0.4815 | 0.4870 | 0.4939 | 0.5010 | 0.5104 | 0.5194 | 0.5291 | 0.5381 | 0.5471 | 0.5553 | 0.5622 | 0.5686 | 0.5746 | 0.5810 | 0.5868 | 0.5942 | 0.6020 | 0.6106 | 0.6184 | 0.6266 | 0.6349 | 0.6429 | 0.6502 | 0.6569 | 0.6638 | 0.6708 | 0.6769 |
| Gujarat, Rural           | 0.3342 | 0.3407 | 0.3486 | 0.3558 | 0.3644 | 0.3729 | 0.3819 | 0.3903 | 0.3991 | 0.4072 | 0.4141 | 0.4210 | 0.4277 | 0.4354 | 0.4430 | 0.4518 | 0.4611 | 0.4712 | 0.4804 | 0.4901 | 0.5001 | 0.5102 | 0.5202 | 0.5302 | 0.5410 | 0.5522 | 0.5614 |
| Haryana, Urban           | 0.5062 | 0.5143 | 0.5210 | 0.5282 | 0.5360 | 0.5435 | 0.5518 | 0.5598 | 0.5672 | 0.5747 | 0.5823 | 0.5896 | 0.5964 | 0.6030 | 0.6097 | 0.6172 | 0.6256 | 0.6349 | 0.6446 | 0.6547 | 0.6647 | 0.6744 | 0.6831 | 0.6913 | 0.7003 | 0.7094 | 0.7171 |
| Haryana, Rural           | 0.3544 | 0.3636 | 0.3719 | 0.3803 | 0.3889 | 0.3974 | 0.4068 | 0.4158 | 0.4243 | 0.4327 | 0.4413 | 0.4503 | 0.4593 | 0.4687 | 0.4783 | 0.4884 | 0.4994 | 0.5111 | 0.5230 | 0.5350 | 0.5469 | 0.5588 | 0.5700 | 0.5809 | 0.5925 | 0.6043 | 0.6142 |
| Himachal Pradesh, Urban  | 0.5140 | 0.5221 | 0.5308 | 0.5397 | 0.5491 | 0.5580 | 0.5688 | 0.5793 | 0.5899 | 0.6017 | 0.6135 | 0.6244 | 0.6348 | 0.6449 | 0.6550 | 0.6649 | 0.6750 | 0.6847 | 0.6924 | 0.6994 | 0.7076 | 0.7154 | 0.7225 | 0.7293 | 0.7362 | 0.7430 | 0.7497 |
| Himachal Pradesh, Rural  | 0.3599 | 0.3705 | 0.3814 | 0.3926 | 0.4043 | 0.4159 | 0.4291 | 0.4419 | 0.4549 | 0.4688 | 0.4822 | 0.4966 | 0.5061 | 0.5171 | 0.5281 | 0.5393 | 0.5511 | 0.5625 | 0.5741 | 0.5854 | 0.5976 | 0.6096 | 0.6210 | 0.6321 | 0.6433 | 0.6517 | 0.6593 |
| Jammu and Kashmir, Urban | 0.4515 | 0.4574 | 0.4615 | 0.4698 | 0.4779 | 0.4862 | 0.4941 | 0.5060 | 0.5159 | 0.5284 | 0.5402 | 0.5511 | 0.5619 | 0.5716 | 0.5813 | 0.5900 | 0.5989 | 0.6070 | 0.6155 | 0.6227 | 0.6293 | 0.6363 | 0.6430 | 0.6496 | 0.6566 | 0.6637 | 0.6707 |
| Jammu and Kashmir, Rural | 0.3068 | 0.3124 | 0.3168 | 0.3244 | 0.3316 | 0.3392 | 0.3464 | 0.3568 | 0.3661 | 0.3778 | 0.3892 | 0.4005 | 0.4120 | 0.4234 | 0.4352 | 0.4464 | 0.4577 | 0.4682 | 0.4791 | 0.4897 | 0.5002 | 0.5110 | 0.5216 | 0.5320 | 0.5426 | 0.5534 | 0.5624 |
| Jharkhand, Urban         | 0.4920 | 0.4967 | 0.5020 | 0.5077 | 0.5140 | 0.5208 | 0.5272 | 0.5361 | 0.5448 | 0.5536 | 0.5608 | 0.5688 | 0.5766 | 0.5835 | 0.5914 | 0.5993 | 0.6069 | 0.6152 | 0.6223 | 0.6298 | 0.6382 | 0.6458 | 0.6526 | 0.6591 | 0.6659 | 0.6729 | 0.6794 |
| Jharkhand, Rural         | 0.2688 | 0.2739 | 0.2794 | 0.2852 | 0.2916 | 0.2987 | 0.3051 | 0.3131 | 0.3214 | 0.3302 | 0.3380 | 0.3463 | 0.3544 | 0.3619 | 0.3703 | 0.3788 | 0.3872 | 0.3967 | 0.4052 | 0.4146 | 0.4255 | 0.4363 | 0.4475 | 0.4595 | 0.4722 | 0.4855 | 0.4964 |
| Karnataka, Urban         | 0.4631 | 0.4707 | 0.4777 | 0.4860 | 0.4954 | 0.5050 | 0.5153 | 0.5251 | 0.5359 | 0.5462 | 0.5567 | 0.5665 | 0.5737 | 0.5813 | 0.5891 | 0.5980 | 0.6065 | 0.6155 | 0.6240 | 0.6311 | 0.6394 | 0.6474 | 0.6554 | 0.6635 | 0.6721 | 0.6809 | 0.6880 |
| Karnataka, Rural         | 0.3064 | 0.3143 | 0.3219 | 0.3300 | 0.3386 | 0.3477 | 0.3573 | 0.3666 | 0.3770 | 0.3872 | 0.3972 | 0.4061 | 0.4148 | 0.4233 | 0.4322 | 0.4423 | 0.4526 | 0.4639 | 0.4750 | 0.4851 | 0.4961 | 0.5070 | 0.5179 | 0.5289 | 0.5403 | 0.5519 | 0.5614 |
| Kerala, Urban            | 0.4597 | 0.4662 | 0.4738 | 0.4833 | 0.4940 | 0.5059 | 0.5182 | 0.5301 | 0.5420 | 0.5540 | 0.5649 | 0.5738 | 0.5820 | 0.5894 | 0.5966 | 0.6048 | 0.6127 | 0.6209 | 0.6291 | 0.6379 | 0.6462 | 0.6553 | 0.6642 | 0.6733 | 0.6833 | 0.6924 | 0.6989 |
| Kerala, Rural            | 0.4177 | 0.4254 | 0.4331 | 0.4422 | 0.4524 | 0.4640 | 0.4761 | 0.4879 | 0.5001 | 0.5126 | 0.5241 | 0.5337 | 0.5428 | 0.5510 | 0.5591 | 0.5682 | 0.5771 | 0.5861 | 0.5952 | 0.6046 | 0.6134 | 0.6229 | 0.6324 | 0.6422 | 0.6530 | 0.6622 | 0.6692 |
| Madhya Pradesh, Urban    | 0.4692 | 0.4760 | 0.4831 | 0.4903 | 0.4971 | 0.5040 | 0.5109 | 0.5172 | 0.5220 | 0.5271 | 0.5306 | 0.5348 | 0.5376 | 0.5414 | 0.5455 | 0.5503 | 0.5567 | 0.5639 | 0.5719 | 0.5814 | 0.5908 | 0.6003 | 0.6091 | 0.6172 | 0.6264 | 0.6348 | 0.6428 |
| Madhya Pradesh, Rural    | 0.2797 | 0.2862 | 0.2917 | 0.2961 | 0.3004 | 0.3048 | 0.3094 | 0.3139 | 0.3177 | 0.3220 | 0.3255 | 0.3308 | 0.3357 | 0.3422 | 0.3487 | 0.3550 | 0.3621 | 0.3699 | 0.3782 | 0.3883 | 0.3990 | 0.4108 | 0.4231 | 0.4364 | 0.4507 | 0.4654 | 0.4776 |
| Maharashtra, Urban       | 0.4932 | 0.4993 | 0.5058 | 0.5136 | 0.5216 | 0.5305 | 0.5401 | 0.5495 | 0.5582 | 0.5677 | 0.5761 | 0.5838 | 0.5910 | 0.5983 | 0.6065 | 0.6161 | 0.6266 | 0.6379 | 0.6484 | 0.6584 | 0.6687 | 0.6783 | 0.6868 | 0.6948 | 0.7032 | 0.7117 | 0.7189 |
| Maharashtra, Rural       | 0.3641 | 0.3728 | 0.3819 | 0.3912 | 0.4003 | 0.4103 | 0.4206 | 0.4303 | 0.4394 | 0.4488 | 0.4567 | 0.4643 | 0.4718 | 0.4796 | 0.4881 | 0.4982 | 0.5096 | 0.5218 | 0.5333 | 0.5445 | 0.5558 | 0.5667 | 0.5767 | 0.5864 | 0.5965 | 0.6067 | 0.6153 |
| Manipur, Urban           | 0.4268 | 0.4341 | 0.4407 | 0.4472 | 0.4527 | 0.4584 | 0.4647 | 0.4715 | 0.4787 | 0.4887 | 0.4981 | 0.5088 | 0.5190 | 0.5296 | 0.5414 | 0.5535 | 0.5640 | 0.5737 | 0.5823 | 0.5916 | 0.5998 | 0.6092 | 0.6182 | 0.6269 | 0.6361 | 0.6429 | 0.6497 |
| Manipur, Rural           | 0.3408 | 0.3489 | 0.3563 | 0.3625 | 0.3666 | 0.3708 | 0.3754 | 0.3809 | 0.3875 | 0.3975 | 0.4077 | 0.4193 | 0.4303 | 0.4420 | 0.4552 | 0.4693 | 0.4820 | 0.4937 | 0.5042 | 0.5150 | 0.5246 | 0.5351 | 0.5452 | 0.5549 | 0.5650 | 0.5755 | 0.5847 |
| Meghalaya, Urban         | 0.4730 | 0.4741 | 0.4740 | 0.4760 | 0.4794 | 0.4844 | 0.4901 | 0.4976 | 0.5057 | 0.5160 | 0.5293 | 0.5445 | 0.5588 | 0.5718 | 0.5837 | 0.5949 | 0.6046 | 0.6130 | 0.6209 | 0.6296 | 0.6381 | 0.6479 | 0.6560 | 0.6649 | 0.6736 | 0.6822 | 0.6956 |
| Meghalaya, Rural         | 0.3066 | 0.3132 | 0.3187 | 0.3232 | 0.3253 | 0.3281 | 0.3312 | 0.3360 | 0.3424 | 0.3520 | 0.3647 | 0.3791 | 0.3929 | 0.4056 | 0.4174 | 0.4288 | 0.4398 | 0.4506 | 0.4611 | 0.4721 | 0.4829 | 0.4946 | 0.5054 | 0.5165 | 0.5280 | 0.5397 | 0.5496 |
| Mizoram, Urban           | 0.4592 | 0.4661 | 0.4722 | 0.4795 | 0.4852 | 0.4916 | 0.5004 | 0.5076 | 0.5142 | 0.5218 | 0.5310 | 0.5396 | 0.5477 | 0.5549 | 0.5616 | 0.5684 | 0.5747 | 0.5808 | 0.5866 | 0.5934 | 0.6011 | 0.6083 | 0.6163 | 0.6245 | 0.6334 | 0.6428 | 0.6513 |
| Mizoram, Rural           | 0.3701 | 0.3781 | 0.3852 | 0.3916 | 0.3946 | 0.3981 | 0.4038 | 0.4084 | 0.4135 | 0.4204 | 0.4297 | 0.4398 | 0.4507 | 0.4614 | 0.4719 | 0.4818 | 0.4914 | 0.5017 | 0.5118 | 0.5230 | 0.5348 | 0.5457 | 0.5572 | 0.5683 | 0.5795 | 0.5907 | 0.6002 |
| Nagaland, Urban          | 0.5126 | 0.5174 | 0.5208 | 0.5249 | 0.5274 | 0.5296 | 0.5320 | 0.5361 | 0.5398 | 0.5443 | 0.5532 | 0.5641 | 0.5761 | 0.5860 | 0.5952 | 0.6042 | 0.6123 | 0.6219 | 0.6316 | 0.6411 | 0.6502 | 0.6604 | 0.6705 | 0.6804 | 0.6912 | 0.7023 | 0.7114 |
| Nagaland, Rural          | 0.3788 | 0.3833 | 0.3866 | 0.3904 | 0.3928 | 0.3953 | 0.3988 | 0.4049 | 0.4118 | 0.4203 | 0.4348 | 0.4521 | 0.4693 | 0.4843 | 0.4983 | 0.5118 | 0.5241 | 0.5372 | 0.5503 | 0.5629 | 0.5747 | 0.5875 | 0.5996 | 0.6111 | 0.6218 | 0.6295 | 0.6370 |
| Odisha, Urban            | 0.4380 | 0.4445 | 0.4499 | 0.4554 | 0.4613 | 0.4687 | 0.4744 | 0.4810 | 0.4882 | 0.4963 | 0.5038 | 0.5117 | 0.5189 | 0.5273 | 0.5363 | 0.5440 | 0.5522 | 0.5608 | 0.5686 | 0.5755 | 0.5835 | 0.5910 | 0.5993 | 0.6079 | 0.6174 | 0.6272 | 0.6354 |
| Odisha, Rural            | 0.2811 | 0.2874 | 0.2930 | 0.2987 | 0.3045 | 0.3120 | 0.3179 | 0.3248 | 0.3326 | 0.3414 | 0.3497 | 0.3584 | 0.3665 | 0.3761 | 0.38   |        |        |        |        |        |        |        |        |        |        |        |        |

Appendix Table SB. SDI Values by location, 1990-2016

| Location                         | 1990   | 1991   | 1992   | 1993   | 1994   | 1995   | 1996   | 1997   | 1998   | 1999   | 2000   | 2001   | 2002   | 2003   | 2004   | 2005   | 2006   | 2007   | 2008   | 2009   | 2010   | 2011   | 2012   | 2013   | 2014   | 2015   | 2016   |
|----------------------------------|--------|--------|--------|--------|--------|--------|--------|--------|--------|--------|--------|--------|--------|--------|--------|--------|--------|--------|--------|--------|--------|--------|--------|--------|--------|--------|--------|
| Angola                           | 0.2522 | 0.2561 | 0.2597 | 0.2621 | 0.2647 | 0.2678 | 0.2719 | 0.2763 | 0.2814 | 0.2860 | 0.2894 | 0.2937 | 0.2991 | 0.3048 | 0.3115 | 0.3197 | 0.3294 | 0.3394 | 0.3487 | 0.3569 | 0.3660 | 0.3766 | 0.3883 | 0.3997 | 0.4109 | 0.4221 | 0.4309 |
| Central African Republic         | 0.2466 | 0.2497 | 0.2522 | 0.2545 | 0.2576 | 0.2608 | 0.2630 | 0.2658 | 0.2692 | 0.2726 | 0.2757 | 0.2790 | 0.2826 | 0.2851 | 0.2881 | 0.2911 | 0.2947 | 0.2998 | 0.3028 | 0.3068 | 0.3113 | 0.3164 | 0.3217 | 0.3270 | 0.3316 | 0.3367 | 0.3416 |
| Congo                            | 0.3794 | 0.3864 | 0.3929 | 0.3989 | 0.4041 | 0.4095 | 0.4154 | 0.4208 | 0.4258 | 0.4300 | 0.4344 | 0.4389 | 0.4445 | 0.4499 | 0.4558 | 0.4618 | 0.4670 | 0.4709 | 0.4751 | 0.4799 | 0.4868 | 0.4945 | 0.5029 | 0.5109 | 0.5185 | 0.5258 | 0.5312 |
| Democratic Republic of the Congo | 0.2827 | 0.2837 | 0.2851 | 0.2843 | 0.2821 | 0.2799 | 0.2768 | 0.2729 | 0.2682 | 0.2635 | 0.2573 | 0.2513 | 0.2464 | 0.2434 | 0.2424 | 0.2430 | 0.2418 | 0.2414 | 0.2423 | 0.2438 | 0.2510 | 0.2602 | 0.2703 | 0.2822 | 0.2923 | 0.3036 | 0.3124 |
| Equatorial Guinea                | 0.2904 | 0.2917 | 0.2970 | 0.3034 | 0.3106 | 0.3215 | 0.3425 | 0.3816 | 0.4091 | 0.4335 | 0.4590 | 0.4862 | 0.5094 | 0.5280 | 0.5476 | 0.5647 | 0.5786 | 0.5918 | 0.6048 | 0.6144 | 0.6236 | 0.6334 | 0.6428 | 0.6510 | 0.6584 | 0.6646 | 0.6693 |
| Gabon                            | 0.4576 | 0.4659 | 0.4738 | 0.4817 | 0.4897 | 0.4976 | 0.5058 | 0.5139 | 0.5214 | 0.5275 | 0.5310 | 0.5343 | 0.5395 | 0.5450 | 0.5510 | 0.5576 | 0.5636 | 0.5700 | 0.5761 | 0.5810 | 0.5863 | 0.5925 | 0.5990 | 0.6050 | 0.6109 | 0.6172 | 0.6224 |
| Eastern Sub-Saharan Africa       | 0.2281 | 0.2340 | 0.2392 | 0.2441 | 0.2487 | 0.2536 | 0.2588 | 0.2637 | 0.2683 | 0.2728 | 0.2772 | 0.2818 | 0.2864 | 0.2911 | 0.2962 | 0.3017 | 0.3077 | 0.3144 | 0.3214 | 0.3288 | 0.3367 | 0.3451 | 0.3538 | 0.3625 | 0.3712 | 0.3797 | 0.3867 |
| Burundi                          | 0.1881 | 0.1929 | 0.1973 | 0.2004 | 0.2020 | 0.2022 | 0.2017 | 0.2012 | 0.2015 | 0.2025 | 0.2037 | 0.2055 | 0.2077 | 0.2103 | 0.2135 | 0.2169 | 0.2206 | 0.2244 | 0.2286 | 0.2336 | 0.2396 | 0.2458 | 0.2522 | 0.2590 | 0.2662 | 0.2723 | 0.2765 |
| Comoros                          | 0.2748 | 0.2819 | 0.2893 | 0.2967 | 0.3027 | 0.3094 | 0.3153 | 0.3207 | 0.3254 | 0.3300 | 0.3347 | 0.3401 | 0.3462 | 0.3525 | 0.3589 | 0.3656 | 0.3731 | 0.3805 | 0.3880 | 0.3955 | 0.4029 | 0.4104 | 0.4188 | 0.4275 | 0.4355 | 0.4433 | 0.4488 |
| Djibouti                         | 0.1989 | 0.2075 | 0.2155 | 0.2229 | 0.2296 | 0.2370 | 0.2444 | 0.2515 | 0.2583 | 0.2654 | 0.2724 | 0.2799 | 0.2875 | 0.2956 | 0.3039 | 0.3124 | 0.3215 | 0.3307 | 0.3403 | 0.3498 | 0.3594 | 0.3690 | 0.3789 | 0.3887 | 0.3986 | 0.4086 | 0.4157 |
| Eritrea                          | 0.1873 | 0.1931 | 0.1999 | 0.2081 | 0.2182 | 0.2292 | 0.2410 | 0.2538 | 0.2666 | 0.2789 | 0.2900 | 0.3000 | 0.3086 | 0.3152 | 0.3207 | 0.3257 | 0.3301 | 0.3346 | 0.3380 | 0.3418 | 0.3464 | 0.3524 | 0.3594 | 0.3667 | 0.3745 | 0.3827 | 0.3892 |
| Ethiopia                         | 0.1532 | 0.1558 | 0.1578 | 0.1605 | 0.1631 | 0.1665 | 0.1706 | 0.1751 | 0.1786 | 0.1824 | 0.1865 | 0.1915 | 0.1961 | 0.1999 | 0.2052 | 0.2120 | 0.2198 | 0.2291 | 0.2394 | 0.2496 | 0.2605 | 0.2721 | 0.2837 | 0.2953 | 0.3062 | 0.3168 | 0.3260 |
| Kenya                            | 0.3348 | 0.3463 | 0.3570 | 0.3668 | 0.3760 | 0.3845 | 0.3925 | 0.3996 | 0.4054 | 0.4104 | 0.4152 | 0.4200 | 0.4246 | 0.4293 | 0.4344 | 0.4397 | 0.4456 | 0.4520 | 0.4585 | 0.4652 | 0.4729 | 0.4810 | 0.4892 | 0.4975 | 0.5057 | 0.5139 | 0.5201 |
| Madagascar                       | 0.2548 | 0.2596 | 0.2636 | 0.2667 | 0.2695 | 0.2723 | 0.2753 | 0.2784 | 0.2818 | 0.2855 | 0.2895 | 0.2942 | 0.2973 | 0.3016 | 0.3062 | 0.3108 | 0.3146 | 0.3185 | 0.3231 | 0.3270 | 0.3311 | 0.3375 | 0.3440 | 0.3497 | 0.3554 | 0.3611 | 0.3654 |
| Malawi                           | 0.2046 | 0.2103 | 0.2146 | 0.2189 | 0.2225 | 0.2269 | 0.2320 | 0.2378 | 0.2431 | 0.2486 | 0.2539 | 0.2581 | 0.2628 | 0.2677 | 0.2732 | 0.2785 | 0.2835 | 0.2896 | 0.2960 | 0.3018 | 0.3077 | 0.3139 | 0.3196 | 0.3258 | 0.3335 | 0.3421 | 0.3484 |
| Mozambique                       | 0.1445 | 0.1485 | 0.1506 | 0.1533 | 0.1566 | 0.1584 | 0.1646 | 0.1720 | 0.1795 | 0.1864 | 0.1927 | 0.1997 | 0.2071 | 0.2139 | 0.2201 | 0.2257 | 0.2310 | 0.2362 | 0.2416 | 0.2473 | 0.2533 | 0.2599 | 0.2679 | 0.2772 | 0.2870 | 0.2971 | 0.3056 |
| Rwanda                           | 0.1814 | 0.1966 | 0.2083 | 0.2169 | 0.2196 | 0.2228 | 0.2259 | 0.2298 | 0.2335 | 0.2368 | 0.2403 | 0.2444 | 0.2500 | 0.2559 | 0.2632 | 0.2719 | 0.2823 | 0.2930 | 0.3051 | 0.3177 | 0.3302 | 0.3423 | 0.3539 | 0.3646 | 0.3743 | 0.3833 | 0.3904 |
| Somalia                          | 0.1868 | 0.1901 | 0.1921 | 0.1944 | 0.1953 | 0.1963 | 0.1975 | 0.1982 | 0.1989 | 0.1998 | 0.2011 | 0.2029 | 0.2054 | 0.2085 | 0.2122 | 0.2161 | 0.2204 | 0.2250 | 0.2300 | 0.2351 | 0.2403 | 0.2455 | 0.2507 | 0.2556 | 0.2603 | 0.2647 | 0.2679 |
| Tanzania                         | 0.2454 | 0.2512 | 0.2556 | 0.2593 | 0.2635 | 0.2705 | 0.2794 | 0.2876 | 0.2954 | 0.3024 | 0.3084 | 0.3142 | 0.3202 | 0.3263 | 0.3324 | 0.3389 | 0.3454 | 0.3523 | 0.3595 | 0.3668 | 0.3747 | 0.3835 | 0.3925 | 0.4016 | 0.4110 | 0.4205 | 0.4281 |
| Uganda                           | 0.1768 | 0.1836 | 0.1901 | 0.1963 | 0.2030 | 0.2091 | 0.2148 | 0.2203 | 0.2258 | 0.2317 | 0.2376 | 0.2438 | 0.2505 | 0.2574 | 0.2646 | 0.2722 | 0.2804 | 0.2892 | 0.2983 | 0.3078 | 0.3175 | 0.3277 | 0.3379 | 0.3484 | 0.3590 | 0.3696 | 0.3771 |
| Zambia                           | 0.2992 | 0.3074 | 0.3147 | 0.3213 | 0.3265 | 0.3312 | 0.3356 | 0.3396 | 0.3431 | 0.3464 | 0.3499 | 0.3535 | 0.3574 | 0.3616 | 0.3663 | 0.3714 | 0.3771 | 0.3847 | 0.3929 | 0.4013 | 0.4102 | 0.4193 | 0.4285 | 0.4372 | 0.4457 | 0.4539 | 0.4602 |
| South Sudan                      | 0.0824 | 0.0876 | 0.0921 | 0.0955 | 0.0983 | 0.1016 | 0.1053 | 0.1084 | 0.1113 | 0.1140 | 0.1167 | 0.1198 | 0.1231 | 0.1266 | 0.1303 | 0.1341 | 0.1383 | 0.1428 | 0.1476 | 0.1525 | 0.1579 | 0.1635 | 0.1696 | 0.1758 | 0.1817 | 0.1877 | 0.1916 |
| Central                          | 0.4130 | 0.4245 | 0.4350 | 0.4444 | 0.4533 | 0.4616 | 0.4695 | 0.4764 | 0.4823 | 0.4874 | 0.4920 | 0.4967 | 0.5011 | 0.5054 | 0.5100 | 0.5150 | 0.5206 | 0.5270 | 0.5332 | 0.5395 | 0.5460 | 0.5529 | 0.5597 | 0.5665 | 0.5730 | 0.5795 | 0.5847 |
| Coast                            | 0.2521 | 0.2639 | 0.2754 | 0.2860 | 0.2959 | 0.3049 | 0.3134 | 0.3210 | 0.3271 | 0.3321 | 0.3372 | 0.3426 | 0.3482 | 0.3542 | 0.3608 | 0.3680 | 0.3758 | 0.3846 | 0.3935 | 0.4031 | 0.4130 | 0.4233 | 0.4339 | 0.4445 | 0.4549 | 0.4653 | 0.4728 |
| Eastern                          | 0.3097 | 0.3218 | 0.3332 | 0.3436 | 0.3534 | 0.3624 | 0.3711 | 0.3787 | 0.3851 | 0.3906 | 0.3959 | 0.4014 | 0.4067 | 0.4122 | 0.4179 | 0.4240 | 0.4305 | 0.4378 | 0.4449 | 0.4522 | 0.4597 | 0.4674 | 0.4751 | 0.4828 | 0.4902 | 0.4976 | 0.5033 |
| Nairobi                          | 0.5261 | 0.5359 | 0.5447 | 0.5525 | 0.5600 | 0.5670 | 0.5738 | 0.5796 | 0.5847 | 0.5892 | 0.5934 | 0.5978 | 0.6021 | 0.6065 | 0.6114 | 0.6168 | 0.6231 | 0.6302 | 0.6372 | 0.6445 | 0.6521 | 0.6602 | 0.6685 | 0.6770 | 0.6855 | 0.6939 | 0.7008 |
| North Eastern                    | 0.0583 | 0.0594 | 0.0605 | 0.0616 | 0.0675 | 0.0752 | 0.0796 | 0.0815 | 0.0757 | 0.0682 | 0.0692 | 0.0703 | 0.0713 | 0.0723 | 0.0733 | 0.0744 | 0.0754 | 0.0765 | 0.0776 | 0.0786 | 0.0798 | 0.0812 | 0.0827 | 0.0844 | 0.0920 | 0.1117 | 0.1244 |
| Nyanza                           | 0.3182 | 0.3307 | 0.3426 | 0.3535 | 0.3638 | 0.3735 | 0.3827 | 0.3910 | 0.3982 | 0.4045 | 0.4106 | 0.4169 | 0.4230 | 0.4292 | 0.4358 | 0.4426 | 0.4501 | 0.4583 | 0.4663 | 0.4746 | 0.4829 | 0.4914 | 0.4999 | 0.5083 | 0.5164 | 0.5244 | 0.5305 |
| Rift Valley                      | 0.2921 | 0.3045 | 0.3164 | 0.3273 | 0.3374 | 0.3467 | 0.3555 | 0.3633 | 0.3697 | 0.3751 | 0.3806 | 0.3861 | 0.3916 | 0.3973 | 0.4034 | 0.4098 | 0.4167 | 0.4244 | 0.4320 | 0.4399 | 0.4481 | 0.4566 | 0.4653 | 0.4739 | 0.4824 | 0.4907 | 0.4968 |
| Western                          | 0.3323 | 0.3431 | 0.3531 | 0.3621 | 0.3705 | 0.3781 | 0.3852 | 0.3913 | 0.3962 | 0.4002 | 0.4042 | 0.4083 | 0.4123 | 0.4165 | 0.4209 | 0.4257 | 0.4311 | 0.4373 | 0.4432 | 0.4496 | 0.4561 | 0.4631 | 0.4702 | 0.4774 | 0.4843 | 0.4912 | 0.4964 |
| Kiambu                           | 0.4405 | 0.4516 | 0.4615 | 0.4703 | 0.4783 | 0.4857 | 0.4925 | 0.4983 | 0.5031 | 0.5071 | 0.5111 | 0.5152 | 0.5190 | 0.5227 | 0.5265 | 0.5308 | 0.5357 | 0.5415 | 0.5469 | 0.5529 | 0.5594 | 0.5665 | 0.5737 | 0.5811 | 0.5884 | 0.5955 | 0.6013 |
| Kirinyaga                        | 0.3887 | 0.3987 | 0.4050 | 0.4173 | 0.4273 | 0.4367 | 0.4458 | 0.4538 | 0.4607 | 0.4668 | 0.4725 | 0.4786 | 0.4843 | 0.4898 | 0.4953 | 0.5012 | 0.5076 | 0.5144 | 0.5205 | 0.5267 | 0.5331 | 0.5396 | 0.5460 | 0.5522 | 0.5582 | 0.5643 | 0.5691 |
| Murang'a                         | 0.3951 | 0.4057 | 0.4153 | 0.4237 | 0.4319 | 0.4397 | 0.4474 | 0.4543 | 0.4605 | 0.4662 | 0.4716 | 0.4769 | 0.4819 | 0.4869 | 0.4920 | 0.4972 | 0.5028 | 0.5091 | 0.5148 | 0.5203 | 0.5258 | 0.5314 | 0.5369 | 0.5422 | 0.5472 | 0.5522 | 0.5561 |
| Nyandarua                        | 0.3831 | 0.3948 | 0.4055 | 0.4148 | 0.4233 | 0.4314 | 0.4392 | 0.4461 | 0.4520 | 0.4574 | 0.4620 | 0.4662 | 0.4702 | 0.4744 | 0.4788 | 0.4836 | 0.4891 | 0.4958 | 0.5028 | 0.5102 | 0.5179 | 0.5260 | 0.5341 | 0.5422 | 0.5499 | 0.5577 | 0.5637 |
| Nyeri                            | 0.4194 | 0.4320 | 0.4433 | 0.4530 | 0.4617 | 0.4696 | 0.4770 | 0.4832 | 0.4883 | 0.4924 | 0.4960 | 0.4995 | 0.5030 | 0.5069 | 0.5117 | 0.5171 | 0.5236 | 0.5311 | 0.5385 | 0.5458 | 0.5527 | 0.5595 | 0.5659 | 0.5720 | 0.5774 | 0.5829 | 0.5873 |
| Kilifi                           | 0.1503 | 0.1664 | 0.1817 | 0.1969 | 0.2121 | 0.2258 | 0.2383 | 0.2492 | 0.2584 | 0.2665 | 0.2733 | 0.2798 | 0.2858 | 0.2909 | 0.2955 | 0.3006 | 0.3062 | 0.3134 | 0.3215 | 0.3304 | 0.3410 | 0.3523 | 0.3638 | 0.3755 | 0.3871 | 0.3984 | 0.4062 |
| Kwale                            | 0.2214 | 0.2338 | 0.2456 | 0.2546 | 0.2607 | 0.2659 | 0.2708 | 0.2750 | 0.2776 | 0.2796 | 0.2812 | 0.2829 | 0.2851 | 0.2888 | 0.2939 | 0.2996 | 0.3062 | 0.3144 | 0.3239 | 0.3343 | 0.3456 | 0.3573 | 0.3692 | 0.3812 | 0.3928 | 0.4042 | 0.4121 |
| Lamu                             | 0.2619 | 0.2687 | 0.2758 | 0.2833 | 0.2918 | 0.3004 | 0.3092 | 0.3174 | 0.3249 | 0.3319 | 0.3382 | 0.3441 | 0.3494 | 0.3548 | 0.3602 | 0.3654 | 0.3706 | 0.3760 | 0.3815 | 0.3881 | 0.3945 | 0.4056 | 0.4150 | 0.4247 | 0.4342 | 0.4437 | 0.4503 |
| Mombasa                          | 0.3598 | 0.3721 | 0.3837 | 0.3941 | 0.4037 | 0.4126 | 0.4212 | 0.4288 | 0.4349 | 0.4399 | 0.4436 | 0.4478 | 0.4522 | 0.4573 | 0.4632 | 0.4697 | 0.4768 | 0.4844 | 0.4914 | 0.4987 | 0.5083 | 0.5184 | 0.52   |        |        |        |        |

Appendix Table SB. SDI Values by location, 1990-2016

| Location                    | 1990   | 1991   | 1992   | 1993   | 1994   | 1995   | 1996   | 1997   | 1998   | 1999   | 2000   | 2001   | 2002   | 2003   | 2004   | 2005   | 2006   | 2007   | 2008   | 2009   | 2010   | 2011   | 2012   | 2013   | 2014   | 2015   | 2016   |
|-----------------------------|--------|--------|--------|--------|--------|--------|--------|--------|--------|--------|--------|--------|--------|--------|--------|--------|--------|--------|--------|--------|--------|--------|--------|--------|--------|--------|--------|
| Elgeyo-Marakwet             | 0.2784 | 0.2908 | 0.3027 | 0.3130 | 0.3223 | 0.3310 | 0.3396 | 0.3475 | 0.3550 | 0.3623 | 0.3707 | 0.3795 | 0.3879 | 0.3951 | 0.4013 | 0.4078 | 0.4151 | 0.4240 | 0.4335 | 0.4437 | 0.4533 | 0.4631 | 0.4728 | 0.4825 | 0.4919 | 0.5010 | 0.5078 |
| Kajiado                     | 0.3250 | 0.3377 | 0.3498 | 0.3600 | 0.3683 | 0.3758 | 0.3828 | 0.3887 | 0.3926 | 0.3950 | 0.3986 | 0.4032 | 0.4087 | 0.4164 | 0.4263 | 0.4369 | 0.4480 | 0.4597 | 0.4706 | 0.4805 | 0.4889 | 0.4975 | 0.5064 | 0.5154 | 0.5244 | 0.5331 | 0.5395 |
| Kericho                     | 0.2422 | 0.2607 | 0.2783 | 0.2955 | 0.3125 | 0.3284 | 0.3431 | 0.3563 | 0.3678 | 0.3780 | 0.3881 | 0.3972 | 0.4057 | 0.4133 | 0.4204 | 0.4278 | 0.4360 | 0.4450 | 0.4550 | 0.4661 | 0.4764 | 0.4871 | 0.4979 | 0.5085 | 0.5187 | 0.5286 | 0.5360 |
| Laikipia                    | 0.3376 | 0.3490 | 0.3602 | 0.3725 | 0.3858 | 0.3983 | 0.4101 | 0.4202 | 0.4283 | 0.4348 | 0.4419 | 0.4491 | 0.4560 | 0.4629 | 0.4700 | 0.4779 | 0.4867 | 0.4965 | 0.5069 | 0.5178 | 0.5275 | 0.5372 | 0.5468 | 0.5563 | 0.5656 | 0.5747 | 0.5819 |
| Nakuru                      | 0.3207 | 0.3329 | 0.3445 | 0.3550 | 0.3647 | 0.3733 | 0.3815 | 0.3885 | 0.3941 | 0.3984 | 0.4030 | 0.4077 | 0.4131 | 0.4204 | 0.4299 | 0.4407 | 0.4526 | 0.4658 | 0.4787 | 0.4916 | 0.5034 | 0.5149 | 0.5260 | 0.5365 | 0.5464 | 0.5561 | 0.5634 |
| Nandi                       | 0.2704 | 0.2851 | 0.2993 | 0.3131 | 0.3265 | 0.3388 | 0.3501 | 0.3599 | 0.3675 | 0.3739 | 0.3816 | 0.3902 | 0.3990 | 0.4080 | 0.4172 | 0.4266 | 0.4362 | 0.4461 | 0.4552 | 0.4647 | 0.4735 | 0.4825 | 0.4914 | 0.5000 | 0.5083 | 0.5163 | 0.5220 |
| Narok                       | 0.2312 | 0.2441 | 0.2568 | 0.2692 | 0.2816 | 0.2934 | 0.3046 | 0.3145 | 0.3227 | 0.3281 | 0.3322 | 0.3358 | 0.3394 | 0.3451 | 0.3528 | 0.3607 | 0.3684 | 0.3753 | 0.3808 | 0.3875 | 0.3942 | 0.4018 | 0.4099 | 0.4182 | 0.4265 | 0.4348 | 0.4406 |
| Samburu                     | 0.2162 | 0.2202 | 0.2238 | 0.2268 | 0.2293 | 0.2314 | 0.2334 | 0.2348 | 0.2354 | 0.2348 | 0.2355 | 0.2377 | 0.2409 | 0.2454 | 0.2512 | 0.2574 | 0.2638 | 0.2701 | 0.2753 | 0.2812 | 0.2865 | 0.2917 | 0.2969 | 0.3023 | 0.3076 | 0.3128 | 0.3164 |
| TransNzoia                  | 0.2784 | 0.2962 | 0.3129 | 0.3278 | 0.3411 | 0.3533 | 0.3644 | 0.3741 | 0.3822 | 0.3896 | 0.3979 | 0.4054 | 0.4120 | 0.4176 | 0.4223 | 0.4270 | 0.4322 | 0.4384 | 0.4451 | 0.4532 | 0.4616 | 0.4706 | 0.4798 | 0.4889 | 0.4977 | 0.5064 | 0.5130 |
| Turkana                     | 0.2269 | 0.2311 | 0.2350 | 0.2385 | 0.2415 | 0.2441 | 0.2469 | 0.2492 | 0.2506 | 0.2501 | 0.2491 | 0.2484 | 0.2482 | 0.2488 | 0.2505 | 0.2530 | 0.2559 | 0.2600 | 0.2645 | 0.2685 | 0.2708 | 0.2733 | 0.2762 | 0.2794 | 0.2830 | 0.2867 | 0.2895 |
| UasinGishu                  | 0.3289 | 0.3421 | 0.3547 | 0.3659 | 0.3760 | 0.3857 | 0.3952 | 0.4042 | 0.4130 | 0.4220 | 0.4322 | 0.4428 | 0.4530 | 0.4619 | 0.4697 | 0.4775 | 0.4857 | 0.4948 | 0.5040 | 0.5133 | 0.5216 | 0.5302 | 0.5389 | 0.5475 | 0.5558 | 0.5639 | 0.5698 |
| WestPokot                   | 0.2300 | 0.2403 | 0.2500 | 0.2579 | 0.2642 | 0.2697 | 0.2747 | 0.2786 | 0.2805 | 0.2812 | 0.2827 | 0.2843 | 0.2862 | 0.2888 | 0.2923 | 0.2965 | 0.3013 | 0.3076 | 0.3142 | 0.3214 | 0.3281 | 0.3353 | 0.3429 | 0.3507 | 0.3588 | 0.3669 | 0.3729 |
| Bungoma                     | 0.3159 | 0.3265 | 0.3363 | 0.3451 | 0.3537 | 0.3620 | 0.3703 | 0.3778 | 0.3850 | 0.3918 | 0.3990 | 0.4065 | 0.4135 | 0.4199 | 0.4258 | 0.4316 | 0.4375 | 0.4440 | 0.4496 | 0.4555 | 0.4620 | 0.4691 | 0.4765 | 0.4841 | 0.4916 | 0.4990 | 0.5047 |
| Busia                       | 0.3307 | 0.3409 | 0.3505 | 0.3585 | 0.3653 | 0.3713 | 0.3769 | 0.3817 | 0.3849 | 0.3870 | 0.3900 | 0.3930 | 0.3960 | 0.3991 | 0.4024 | 0.4060 | 0.4102 | 0.4154 | 0.4207 | 0.4266 | 0.4329 | 0.4397 | 0.4467 | 0.4538 | 0.4608 | 0.4677 | 0.4728 |
| Kakamega                    | 0.3322 | 0.3438 | 0.3548 | 0.3647 | 0.3740 | 0.3825 | 0.3904 | 0.3969 | 0.4017 | 0.4051 | 0.4083 | 0.4112 | 0.4140 | 0.4173 | 0.4214 | 0.4261 | 0.4315 | 0.4375 | 0.4437 | 0.4501 | 0.4566 | 0.4634 | 0.4703 | 0.4772 | 0.4839 | 0.4906 | 0.4958 |
| Vihiga                      | 0.3611 | 0.3697 | 0.3775 | 0.3848 | 0.3913 | 0.3967 | 0.4015 | 0.4051 | 0.4076 | 0.4087 | 0.4102 | 0.4123 | 0.4148 | 0.4180 | 0.4224 | 0.4284 | 0.4362 | 0.4461 | 0.4563 | 0.4669 | 0.4765 | 0.4854 | 0.4933 | 0.5005 | 0.5066 | 0.5126 | 0.5167 |
| Southern Sub-Saharan Africa | 0.5581 | 0.5640 | 0.5700 | 0.5767 | 0.5832 | 0.5887 | 0.5949 | 0.6010 | 0.6060 | 0.6107 | 0.6153 | 0.6201 | 0.6249 | 0.6297 | 0.6350 | 0.6404 | 0.6459 | 0.6513 | 0.6564 | 0.6612 | 0.6664 | 0.6720 | 0.6772 | 0.6814 | 0.6850 | 0.6885 | 0.6914 |
| Botswana                    | 0.5080 | 0.5182 | 0.5275 | 0.5362 | 0.5441 | 0.5518 | 0.5603 | 0.5693 | 0.5776 | 0.5865 | 0.5949 | 0.6022 | 0.6093 | 0.6162 | 0.6234 | 0.6310 | 0.6385 | 0.6466 | 0.6502 | 0.6556 | 0.6619 | 0.6688 | 0.6754 | 0.6823 | 0.6892 | 0.6955 | 0.7009 |
| Lesotho                     | 0.3700 | 0.3763 | 0.3831 | 0.3901 | 0.3971 | 0.4034 | 0.4101 | 0.4167 | 0.4229 | 0.4287 | 0.4350 | 0.4417 | 0.4481 | 0.4546 | 0.4618 | 0.4689 | 0.4754 | 0.4822 | 0.4893 | 0.4963 | 0.5043 | 0.5128 | 0.5212 | 0.5293 | 0.5376 | 0.5455 | 0.5516 |
| Namibia                     | 0.4275 | 0.4334 | 0.4412 | 0.4501 | 0.4594 | 0.4687 | 0.4783 | 0.4878 | 0.4968 | 0.5053 | 0.5139 | 0.5223 | 0.5305 | 0.5385 | 0.5471 | 0.5552 | 0.5627 | 0.5693 | 0.5752 | 0.5803 | 0.5855 | 0.5912 | 0.5972 | 0.6037 | 0.6109 | 0.6182 | 0.6242 |
| South Africa                | 0.5955 | 0.6009 | 0.6064 | 0.6127 | 0.6188 | 0.6240 | 0.6297 | 0.6355 | 0.6402 | 0.6446 | 0.6489 | 0.6533 | 0.6583 | 0.6634 | 0.6690 | 0.6752 | 0.6817 | 0.6883 | 0.6948 | 0.7010 | 0.7073 | 0.7138 | 0.7195 | 0.7237 | 0.7271 | 0.7304 | 0.7336 |
| Swaziland                   | 0.4541 | 0.4620 | 0.4698 | 0.4775 | 0.4845 | 0.4915 | 0.4982 | 0.5041 | 0.5092 | 0.5137 | 0.5181 | 0.5221 | 0.5250 | 0.5277 | 0.5307 | 0.5338 | 0.5367 | 0.5381 | 0.5383 | 0.5394 | 0.5443 | 0.5526 | 0.5618 | 0.5709 | 0.5784 | 0.5844 | 0.5890 |
| Zimbabwe                    | 0.4322 | 0.4428 | 0.4517 | 0.4607 | 0.4698 | 0.4773 | 0.4857 | 0.4926 | 0.4980 | 0.5020 | 0.5048 | 0.5071 | 0.5075 | 0.5056 | 0.5026 | 0.4981 | 0.4919 | 0.4854 | 0.4768 | 0.4719 | 0.4644 | 0.4570 | 0.4738 | 0.4853 | 0.4915 | 0.4968 |        |
| Eastern Cape                | 0.5429 | 0.5472 | 0.5515 | 0.5567 | 0.5621 | 0.5670 | 0.5727 | 0.5785 | 0.5829 | 0.5870 | 0.5913 | 0.5957 | 0.6008 | 0.6059 | 0.6118 | 0.6185 | 0.6257 | 0.6332 | 0.6404 | 0.6466 | 0.6530 | 0.6596 | 0.6654 | 0.6697 | 0.6730 | 0.6762 | 0.6792 |
| Free State                  | 0.5914 | 0.5966 | 0.6023 | 0.6093 | 0.6168 | 0.6235 | 0.6307 | 0.6371 | 0.6414 | 0.6451 | 0.6485 | 0.6522 | 0.6565 | 0.6610 | 0.6661 | 0.6718 | 0.6779 | 0.6842 | 0.6904 | 0.6962 | 0.7021 | 0.7083 | 0.7137 | 0.7177 | 0.7210 | 0.7241 | 0.7272 |
| Gauteng                     | 0.6917 | 0.6950 | 0.6982 | 0.7016 | 0.7046 | 0.7066 | 0.7090 | 0.7120 | 0.7148 | 0.7178 | 0.7209 | 0.7243 | 0.7277 | 0.7312 | 0.7353 | 0.7398 | 0.7445 | 0.7492 | 0.7539 | 0.7585 | 0.7633 | 0.7683 | 0.7726 | 0.7755 | 0.7775 | 0.7797 | 0.7819 |
| KwaZulu-Natal               | 0.5709 | 0.5761 | 0.5814 | 0.5877 | 0.5939 | 0.5989 | 0.6047 | 0.6104 | 0.6150 | 0.6194 | 0.6240 | 0.6287 | 0.6337 | 0.6389 | 0.6447 | 0.6511 | 0.6580 | 0.6651 | 0.6721 | 0.6786 | 0.6852 | 0.6920 | 0.6980 | 0.7025 | 0.7060 | 0.7095 | 0.7128 |
| Limpopo                     | 0.5108 | 0.5175 | 0.5243 | 0.5322 | 0.5401 | 0.5468 | 0.5543 | 0.5619 | 0.5676 | 0.5723 | 0.5768 | 0.5818 | 0.5880 | 0.5945 | 0.6017 | 0.6098 | 0.6184 | 0.6272 | 0.6357 | 0.6432 | 0.6508 | 0.6586 | 0.6654 | 0.6706 | 0.6748 | 0.6787 | 0.6823 |
| Mpumalanga                  | 0.5567 | 0.5632 | 0.5697 | 0.5770 | 0.5838 | 0.5889 | 0.5947 | 0.6008 | 0.6056 | 0.6102 | 0.6147 | 0.6196 | 0.6252 | 0.6310 | 0.6374 | 0.6445 | 0.6519 | 0.6594 | 0.6670 | 0.6740 | 0.6811 | 0.6884 | 0.6948 | 0.6995 | 0.7033 | 0.7070 | 0.7105 |
| North-West                  | 0.5757 | 0.5805 | 0.5849 | 0.5896 | 0.5938 | 0.5968 | 0.6004 | 0.6043 | 0.6082 | 0.6127 | 0.6177 | 0.6228 | 0.6279 | 0.6330 | 0.6386 | 0.6448 | 0.6513 | 0.6580 | 0.6645 | 0.6705 | 0.6768 | 0.6832 | 0.6887 | 0.6927 | 0.6959 | 0.6990 | 0.7021 |
| Northern Cape               | 0.5896 | 0.5938 | 0.5980 | 0.6026 | 0.6069 | 0.6101 | 0.6142 | 0.6189 | 0.6226 | 0.6260 | 0.6295 | 0.6331 | 0.6372 | 0.6414 | 0.6463 | 0.6517 | 0.6575 | 0.6636 | 0.6696 | 0.6754 | 0.6814 | 0.6877 | 0.6932 | 0.6972 | 0.7004 | 0.7036 | 0.7068 |
| Western Cape                | 0.6813 | 0.6841 | 0.6871 | 0.6907 | 0.6946 | 0.6981 | 0.7026 | 0.7076 | 0.7111 | 0.7134 | 0.7153 | 0.7173 | 0.7195 | 0.7219 | 0.7247 | 0.7282 | 0.7319 | 0.7358 | 0.7397 | 0.7435 | 0.7476 | 0.7520 | 0.7557 | 0.7581 | 0.7598 | 0.7617 | 0.7636 |
| Western Sub-Saharan Africa  | 0.2868 | 0.2898 | 0.2934 | 0.2973 | 0.3012 | 0.3053 | 0.3099 | 0.3143 | 0.3185 | 0.3222 | 0.3261 | 0.3304 | 0.3348 | 0.3394 | 0.3450 | 0.3511 | 0.3572 | 0.3637 | 0.3699 | 0.3760 | 0.3828 | 0.3906 | 0.3991 | 0.4073 | 0.4153 | 0.4225 | 0.4278 |
| Benin                       | 0.2168 | 0.2220 | 0.2273 | 0.2326 | 0.2373 | 0.2419 | 0.2469 | 0.2520 | 0.2571 | 0.2622 | 0.2674 | 0.2725 | 0.2776 | 0.2826 | 0.2877 | 0.2928 | 0.2981 | 0.3038 | 0.3096 | 0.3152 | 0.3205 | 0.3257 | 0.3304 | 0.3346 | 0.3398 | 0.3461 | 0.3514 |
| Burkina Faso                | 0.1254 | 0.1301 | 0.1360 | 0.1414 | 0.1456 | 0.1501 | 0.1550 | 0.1598 | 0.1647 | 0.1693 | 0.1733 | 0.1775 | 0.1818 | 0.1862 | 0.1906 | 0.1954 | 0.2005 | 0.2058 | 0.2115 | 0.2174 | 0.2246 | 0.2337 | 0.2436 | 0.2533 | 0.2620 | 0.2691 | 0.2744 |
| Cameroon                    | 0.3409 | 0.3450 | 0.3491 | 0.3527 | 0.3562 | 0.3599 | 0.3644 | 0.3691 | 0.3739 | 0.3785 | 0.3831 | 0.3875 | 0.3920 | 0.3965 | 0.4003 | 0.4033 | 0.4062 | 0.4092 | 0.4122 | 0.4153 | 0.4187 | 0.4228 | 0.4276 | 0.4328 | 0.4387 | 0.4452 | 0.4505 |
| Cape Verde                  | 0.3172 | 0.3247 | 0.3325 | 0.3404 | 0.3490 | 0.3578 | 0.3672 | 0.3769 | 0.3874 | 0.3990 | 0.4103 | 0.4209 | 0.4314 | 0.4418 | 0.4521 | 0.4622 | 0.4726 | 0.4837 | 0.4946 | 0.5046 | 0.5142 | 0.5242 | 0.5336 | 0.5424 | 0.5510 | 0.5592 | 0.5658 |
| Chad                        | 0.1828 | 0.1867 | 0.1906 | 0.1937 | 0.1969 | 0.1998 | 0.2027 | 0.2058 | 0.2088 | 0.2116 | 0.2138 | 0.2166 | 0.2191 | 0.2222 | 0.2282 | 0.2350 | 0.2409 | 0.2465 | 0.2518 | 0.2566 | 0.2624 | 0.2678 | 0.2736 | 0.2796 | 0.2849 | 0.2900 | 0.2950 |
| Cote d'Ivoire               | 0.2774 | 0.2873 | 0.2968 | 0.3058 | 0.3134 | 0.3201 | 0.3266 | 0.3324 | 0.3372 | 0.3412 | 0.3445 | 0.3477 | 0.3507 | 0.3531 | 0.3554 | 0.3577 | 0.3604 | 0.3630 | 0.3661 | 0.3694 | 0.3733 | 0.3769 |        |        |        |        |        |

| <b>Appendix Table 6: GBD world population age standard</b> |                              |                |
|------------------------------------------------------------|------------------------------|----------------|
| <b>Age</b>                                                 | <b>Percent of Population</b> | <b>Rounded</b> |
| ENN                                                        | 0.035667                     | 0.04           |
| LNN                                                        | 0.106232                     | 0.11           |
| PNN                                                        | 1.687834                     | 1.69           |
| 0-1                                                        | 1.829733                     | 1.83           |
| 1-4                                                        | 7.182279                     | 7.18           |
| 5-9                                                        | 8.692810                     | 8.69           |
| 10-14                                                      | 8.395204                     | 8.40           |
| 15-19                                                      | 8.098376                     | 8.10           |
| 20-24                                                      | 7.814477                     | 7.81           |
| 25-29                                                      | 7.559828                     | 7.56           |
| 30-34                                                      | 7.248519                     | 7.25           |
| 35-39                                                      | 6.855877                     | 6.86           |
| 40-44                                                      | 6.384231                     | 6.38           |
| 45-49                                                      | 5.849079                     | 5.85           |
| 50-54                                                      | 5.270976                     | 5.27           |
| 55-59                                                      | 4.678016                     | 4.68           |
| 60-64                                                      | 4.057540                     | 4.06           |
| 65-69                                                      | 3.359068                     | 3.36           |
| 70-74                                                      | 2.629266                     | 2.63           |
| 75-79                                                      | 1.896681                     | 1.90           |
| 80-84                                                      | 1.213480                     | 1.21           |
| 85-89                                                      | 0.644468                     | 0.64           |
| 90-94                                                      | 0.257603                     | 0.26           |
| 95+                                                        | 0.082490                     | 0.08           |

**Appendix Table 7. Number of all-cause mortality data sources by type and location, 1950–2016**

| Geography                                        | SBH | CBH | HH | SIBS | VR/SRS/DSP |
|--------------------------------------------------|-----|-----|----|------|------------|
| Hong Kong Special Administrative Region of China | 2   | 0   | 0  | 0    | 64         |
| Macao Special Administrative Region of China     | 1   | 0   | 0  | 0    | 28         |
| China (without Hong Kong and Macao)              | 4   | 0   | 55 | 0    | 16         |
| Anhui                                            | 4   | 0   | 35 | 0    | 11         |
| Beijing                                          | 4   | 0   | 34 | 0    | 17         |
| Chongqing                                        | 3   | 0   | 34 | 0    | 0          |
| Fujian                                           | 4   | 0   | 34 | 0    | 18         |
| Gansu                                            | 4   | 0   | 34 | 0    | 18         |
| Guangdong                                        | 4   | 0   | 34 | 0    | 11         |
| Guangxi                                          | 4   | 0   | 34 | 0    | 18         |
| Guizhou                                          | 4   | 0   | 34 | 0    | 0          |
| Hainan                                           | 3   | 0   | 34 | 0    | 0          |
| Hebei                                            | 4   | 0   | 34 | 0    | 11         |
| Heilongjiang                                     | 4   | 0   | 33 | 0    | 11         |
| Henan                                            | 4   | 0   | 41 | 0    | 11         |
| Hubei                                            | 4   | 0   | 34 | 0    | 18         |
| Hunan                                            | 4   | 0   | 34 | 0    | 11         |
| Inner Mongolia                                   | 4   | 0   | 34 | 0    | 18         |
| Jiangsu                                          | 3   | 0   | 34 | 0    | 18         |
| Jiangxi                                          | 4   | 0   | 34 | 0    | 11         |
| Jilin                                            | 4   | 0   | 35 | 0    | 0          |
| Liaoning                                         | 4   | 0   | 34 | 0    | 18         |
| Ningxia                                          | 4   | 0   | 34 | 0    | 0          |
| Qinghai                                          | 4   | 0   | 35 | 0    | 0          |
| Shaanxi                                          | 4   | 0   | 34 | 0    | 0          |
| Shandong                                         | 4   | 0   | 34 | 0    | 18         |
| Shanghai                                         | 4   | 0   | 35 | 0    | 14         |
| Shanxi                                           | 4   | 0   | 34 | 0    | 0          |
| Sichuan                                          | 4   | 0   | 33 | 0    | 0          |
| Tianjin                                          | 4   | 0   | 34 | 0    | 17         |
| Tibet                                            | 3   | 0   | 25 | 0    | 18         |
| Xinjiang                                         | 4   | 0   | 31 | 0    | 11         |
| Yunnan                                           | 4   | 0   | 34 | 0    | 11         |
| Zhejiang                                         | 4   | 0   | 34 | 0    | 18         |
| North Korea                                      | 0   | 0   | 1  | 0    | 0          |
| Taiwan (Province of China)                       | 0   | 0   | 0  | 0    | 60         |
| Cambodia                                         | 10  | 5   | 0  | 4    | 0          |
| Indonesia                                        | 43  | 15  | 0  | 5    | 0          |
| Aceh                                             | 30  | 2   | 0  | 4    | 0          |
| Bali                                             | 38  | 3   | 2  | 5    | 0          |
| Bangka-Belitung Islands                          | 24  | 3   | 2  | 4    | 0          |
| Banten                                           | 32  | 3   | 2  | 4    | 0          |
| Bengkulu                                         | 34  | 2   | 2  | 5    | 0          |
| Gorontalo                                        | 22  | 2   | 0  | 5    | 0          |
| Jakarta                                          | 38  | 3   | 4  | 5    | 0          |
| Jambi                                            | 33  | 2   | 2  | 5    | 0          |
| West Java                                        | 38  | 3   | 5  | 5    | 0          |
| Central Java                                     | 38  | 3   | 5  | 5    | 0          |
| East Java                                        | 38  | 3   | 5  | 5    | 0          |



**Appendix Table 7. Number of all-cause mortality data sources by type and location, 1950–2016**

| Geography                      | SBH | CBH | HH | SIBS | VR/SRS/DSP |
|--------------------------------|-----|-----|----|------|------------|
| West Kalimantan                | 34  | 2   | 2  | 5    | 0          |
| South Kalimantan               | 38  | 3   | 2  | 5    | 0          |
| Central Kalimantan             | 35  | 3   | 3  | 5    | 0          |
| East Kalimantan                | 34  | 4   | 1  | 5    | 0          |
| North Kalimantan               | 17  | 2   | 0  | 0    | 0          |
| Riau Islands                   | 28  | 3   | 0  | 5    | 0          |
| Lampung                        | 37  | 3   | 4  | 5    | 0          |
| Maluku                         | 32  | 3   | 0  | 4    | 0          |
| North Maluku                   | 24  | 3   | 0  | 3    | 0          |
| West Nusa Tenggara             | 38  | 3   | 5  | 5    | 0          |
| East Nusa Tenggara             | 34  | 3   | 5  | 5    | 0          |
| Papua                          | 28  | 3   | 0  | 4    | 0          |
| West Papua                     | 28  | 3   | 0  | 4    | 0          |
| Riau                           | 36  | 3   | 2  | 5    | 0          |
| West Sulawesi                  | 29  | 3   | 1  | 3    | 0          |
| South Sulawesi                 | 38  | 3   | 5  | 5    | 0          |
| Central Sulawesi               | 34  | 2   | 5  | 5    | 0          |
| Southeast Sulawesi             | 34  | 3   | 3  | 5    | 0          |
| North Sulawesi                 | 34  | 2   | 1  | 5    | 0          |
| West Sumatra                   | 38  | 3   | 5  | 5    | 0          |
| South Sumatra                  | 38  | 3   | 4  | 5    | 0          |
| North Sumatra                  | 38  | 3   | 5  | 5    | 0          |
| Yogyakarta                     | 38  | 3   | 1  | 5    | 0          |
| Laos                           | 3   | 2   | 0  | 1    | 0          |
| Malaysia                       | 3   | 1   | 0  | 0    | 35         |
| Maldives                       | 6   | 1   | 0  | 0    | 27         |
| Mauritius                      | 0   | 0   | 0  | 0    | 65         |
| Myanmar                        | 5   | 1   | 0  | 0    | 0          |
| Philippines                    | 11  | 6   | 0  | 2    | 61         |
| Sri Lanka                      | 5   | 5   | 0  | 0    | 58         |
| Seychelles                     | 2   | 0   | 1  | 0    | 45         |
| Thailand                       | 11  | 2   | 0  | 0    | 62         |
| Timor-Leste                    | 5   | 5   | 0  | 3    | 0          |
| Vietnam                        | 15  | 3   | 2  | 0    | 0          |
| American Samoa                 | 0   | 0   | 0  | 0    | 50         |
| Federated States of Micronesia | 4   | 0   | 0  | 0    | 0          |
| Fiji                           | 7   | 1   | 0  | 0    | 54         |
| Guam                           | 0   | 0   | 0  | 0    | 59         |
| Kiribati                       | 7   | 1   | 0  | 0    | 11         |
| Marshall Islands               | 2   | 1   | 0  | 0    | 15         |
| Northern Mariana Islands       | 0   | 0   | 0  | 0    | 16         |
| Papua New Guinea               | 5   | 2   | 0  | 0    | 0          |
| Samoa                          | 5   | 1   | 2  | 0    | 18         |
| Solomon Islands                | 4   | 1   | 0  | 0    | 0          |
| Tonga                          | 3   | 1   | 1  | 0    | 15         |
| Vanuatu                        | 4   | 1   | 0  | 0    | 0          |
| Armenia                        | 5   | 4   | 0  | 0    | 35         |
| Azerbaijan                     | 4   | 4   | 0  | 0    | 31         |
| Georgia                        | 3   | 3   | 0  | 0    | 31         |

**Appendix Table 7. Number of all-cause mortality data sources by type and location, 1950–2016**

| Geography              | SBH | CBH | HH | SIBS | VR/SRS/DSP |
|------------------------|-----|-----|----|------|------------|
| Kazakhstan             | 8   | 2   | 0  | 0    | 33         |
| Kyrgyzstan             | 7   | 4   | 0  | 0    | 35         |
| Mongolia               | 8   | 3   | 0  | 0    | 28         |
| Tajikistan             | 7   | 2   | 0  | 0    | 29         |
| Turkmenistan           | 2   | 2   | 0  | 0    | 31         |
| Uzbekistan             | 4   | 2   | 0  | 0    | 29         |
| Albania                | 5   | 2   | 0  | 0    | 33         |
| Bosnia and Herzegovina | 0   | 0   | 0  | 0    | 19         |
| Bulgaria               | 4   | 0   | 0  | 0    | 64         |
| Croatia                | 0   | 0   | 0  | 0    | 30         |
| Czech Republic         | 0   | 0   | 0  | 0    | 66         |
| Hungary                | 1   | 0   | 0  | 0    | 66         |
| Macedonia              | 2   | 0   | 0  | 0    | 25         |
| Montenegro             | 1   | 0   | 4  | 0    | 19         |
| Poland                 | 1   | 0   | 0  | 0    | 65         |
| Romania                | 4   | 2   | 0  | 0    | 60         |
| Serbia                 | 2   | 0   | 4  | 0    | 10         |
| Slovakia               | 0   | 0   | 0  | 0    | 65         |
| Slovenia               | 0   | 0   | 0  | 0    | 34         |
| Belarus                | 2   | 0   | 0  | 0    | 56         |
| Estonia                | 1   | 0   | 0  | 0    | 56         |
| Latvia                 | 1   | 0   | 0  | 0    | 56         |
| Lithuania              | 0   | 0   | 0  | 0    | 57         |
| Moldova                | 4   | 3   | 0  | 0    | 33         |
| Russia                 | 1   | 0   | 0  | 0    | 56         |
| Ukraine                | 5   | 2   | 0  | 0    | 56         |
| Brunei                 | 1   | 0   | 0  | 0    | 45         |
| Japan                  | 0   | 0   | 0  | 0    | 65         |
| Aichi                  | 0   | 0   | 0  | 0    | 35         |
| Akita                  | 0   | 0   | 0  | 0    | 35         |
| Aomori                 | 0   | 0   | 0  | 0    | 35         |
| Chiba                  | 0   | 0   | 0  | 0    | 35         |
| Ehime                  | 0   | 0   | 0  | 0    | 35         |
| Fukui                  | 0   | 0   | 0  | 0    | 35         |
| Fukuoka                | 0   | 0   | 0  | 0    | 35         |
| Fukushima              | 0   | 0   | 0  | 0    | 35         |
| Gifu                   | 0   | 0   | 0  | 0    | 35         |
| Gunma                  | 0   | 0   | 0  | 0    | 35         |
| Hiroshima              | 0   | 0   | 0  | 0    | 35         |
| Hokkaido               | 0   | 0   | 0  | 0    | 35         |
| Hyogo                  | 0   | 0   | 0  | 0    | 35         |
| Ibaraki                | 0   | 0   | 0  | 0    | 35         |
| Ishikawa               | 0   | 0   | 0  | 0    | 35         |
| Iwate                  | 0   | 0   | 0  | 0    | 35         |
| Kagawa                 | 0   | 0   | 0  | 0    | 35         |
| Kagoshima              | 0   | 0   | 0  | 0    | 35         |
| Kanagawa               | 0   | 0   | 0  | 0    | 35         |
| Kochi                  | 0   | 0   | 0  | 0    | 35         |
| Kumamoto               | 0   | 0   | 0  | 0    | 35         |

**Appendix Table 7. Number of all-cause mortality data sources by type and location, 1950–2016**

| Geography   | SBH | CBH | HH | SIBS | VR/SRS/DSP |
|-------------|-----|-----|----|------|------------|
| Kyoto       | 0   | 0   | 0  | 0    | 35         |
| Mie         | 0   | 0   | 0  | 0    | 35         |
| Miyagi      | 0   | 0   | 0  | 0    | 35         |
| Miyazaki    | 0   | 0   | 0  | 0    | 35         |
| Nagano      | 0   | 0   | 0  | 0    | 35         |
| Nagasaki    | 0   | 0   | 0  | 0    | 35         |
| Nara        | 0   | 0   | 0  | 0    | 35         |
| Niigata     | 0   | 0   | 0  | 0    | 35         |
| Oita        | 0   | 0   | 0  | 0    | 35         |
| Okayama     | 0   | 0   | 0  | 0    | 35         |
| Okinawa     | 0   | 0   | 0  | 0    | 35         |
| Osaka       | 0   | 0   | 0  | 0    | 35         |
| Saga        | 0   | 0   | 0  | 0    | 35         |
| Saitama     | 0   | 0   | 0  | 0    | 35         |
| Shiga       | 0   | 0   | 0  | 0    | 35         |
| Shimane     | 0   | 0   | 0  | 0    | 35         |
| Shizuoka    | 0   | 0   | 0  | 0    | 35         |
| Tochigi     | 0   | 0   | 0  | 0    | 35         |
| Tokushima   | 0   | 0   | 0  | 0    | 35         |
| Tokyo       | 0   | 0   | 0  | 0    | 35         |
| Tottori     | 0   | 0   | 0  | 0    | 35         |
| Toyama      | 0   | 0   | 0  | 0    | 35         |
| Wakayama    | 0   | 0   | 0  | 0    | 35         |
| Yamagata    | 0   | 0   | 0  | 0    | 35         |
| Yamaguchi   | 0   | 0   | 0  | 0    | 35         |
| Yamanashi   | 0   | 0   | 0  | 0    | 35         |
| South Korea | 6   | 1   | 0  | 0    | 37         |
| Singapore   | 0   | 0   | 0  | 0    | 64         |
| Australia   | 0   | 0   | 0  | 0    | 65         |
| New Zealand | 0   | 0   | 0  | 0    | 65         |
| Andorra     | 0   | 0   | 0  | 0    | 12         |
| Austria     | 0   | 0   | 0  | 0    | 65         |
| Belgium     | 2   | 0   | 0  | 0    | 65         |
| Cyprus      | 3   | 0   | 0  | 0    | 41         |
| Denmark     | 0   | 0   | 0  | 0    | 65         |
| Finland     | 0   | 0   | 0  | 0    | 66         |
| France      | 0   | 0   | 0  | 0    | 65         |
| Germany     | 0   | 0   | 0  | 0    | 59         |
| Greece      | 0   | 0   | 0  | 0    | 64         |
| Iceland     | 0   | 0   | 0  | 0    | 66         |
| Ireland     | 0   | 0   | 2  | 0    | 65         |
| Israel      | 0   | 0   | 0  | 0    | 65         |
| Italy       | 0   | 0   | 0  | 0    | 64         |
| Luxembourg  | 0   | 0   | 0  | 0    | 64         |
| Malta       | 0   | 0   | 0  | 0    | 65         |
| Netherlands | 0   | 0   | 0  | 0    | 66         |
| Norway      | 0   | 0   | 0  | 0    | 65         |
| Portugal    | 1   | 1   | 0  | 0    | 63         |
| Spain       | 0   | 0   | 0  | 0    | 65         |

**Appendix Table 7. Number of all-cause mortality data sources by type and location, 1950–2016**

| Geography               | SBH | CBH | HH | SIBS | VR/SRS/DSP |
|-------------------------|-----|-----|----|------|------------|
| Sweden                  | 0   | 0   | 0  | 0    | 65         |
| Stockholm               | 0   | 0   | 0  | 0    | 29         |
| Sweden except Stockholm | 0   | 0   | 0  | 0    | 29         |
| Switzerland             | 1   | 0   | 0  | 0    | 65         |
| United Kingdom          | 0   | 0   | 0  | 0    | 63         |
| England                 | 0   | 0   | 0  | 0    | 35         |
| East Midlands           | 0   | 0   | 0  | 0    | 35         |
| Derby                   | 0   | 0   | 0  | 0    | 35         |
| Derbyshire              | 0   | 0   | 0  | 0    | 35         |
| Leicester               | 0   | 0   | 0  | 0    | 35         |
| Leicestershire          | 0   | 0   | 0  | 0    | 35         |
| Lincolnshire            | 0   | 0   | 0  | 0    | 35         |
| Northamptonshire        | 0   | 0   | 0  | 0    | 35         |
| Nottingham              | 0   | 0   | 0  | 0    | 35         |
| Nottinghamshire         | 0   | 0   | 0  | 0    | 35         |
| Rutland                 | 0   | 0   | 0  | 0    | 35         |
| East of England         | 0   | 0   | 0  | 0    | 35         |
| Bedford                 | 0   | 0   | 0  | 0    | 35         |
| Cambridgeshire          | 0   | 0   | 0  | 0    | 35         |
| Central Bedfordshire    | 0   | 0   | 0  | 0    | 35         |
| Essex                   | 0   | 0   | 0  | 0    | 35         |
| Hertfordshire           | 0   | 0   | 0  | 0    | 35         |
| Luton                   | 0   | 0   | 0  | 0    | 35         |
| Norfolk                 | 0   | 0   | 0  | 0    | 35         |
| Peterborough            | 0   | 0   | 0  | 0    | 35         |
| Southend-on-Sea         | 0   | 0   | 0  | 0    | 35         |
| Suffolk                 | 0   | 0   | 0  | 0    | 35         |
| Thurrock                | 0   | 0   | 0  | 0    | 35         |
| Greater London          | 0   | 0   | 0  | 0    | 35         |
| Barking and Dagenham    | 0   | 0   | 0  | 0    | 35         |
| Barnet                  | 0   | 0   | 0  | 0    | 35         |
| Bexley                  | 0   | 0   | 0  | 0    | 35         |
| Brent                   | 0   | 0   | 0  | 0    | 35         |
| Bromley                 | 0   | 0   | 0  | 0    | 35         |
| Camden                  | 0   | 0   | 0  | 0    | 35         |
| Croydon                 | 0   | 0   | 0  | 0    | 35         |
| Ealing                  | 0   | 0   | 0  | 0    | 35         |
| Enfield                 | 0   | 0   | 0  | 0    | 35         |
| Greenwich               | 0   | 0   | 0  | 0    | 35         |
| Hackney                 | 0   | 0   | 0  | 0    | 35         |
| Hammersmith and Fulham  | 0   | 0   | 0  | 0    | 35         |
| Haringey                | 0   | 0   | 0  | 0    | 35         |
| Harrow                  | 0   | 0   | 0  | 0    | 35         |
| Havering                | 0   | 0   | 0  | 0    | 35         |
| Hillingdon              | 0   | 0   | 0  | 0    | 35         |
| Hounslow                | 0   | 0   | 0  | 0    | 35         |
| Islington               | 0   | 0   | 0  | 0    | 35         |
| Kensington and Chelsea  | 0   | 0   | 0  | 0    | 35         |
| Kingston upon Thames    | 0   | 0   | 0  | 0    | 35         |

**Appendix Table 7. Number of all-cause mortality data sources by type and location, 1950–2016**

| Geography                 | SBH | CBH | HH | SIBS | VR/SRS/DSP |
|---------------------------|-----|-----|----|------|------------|
| Lambeth                   | 0   | 0   | 0  | 0    | 35         |
| Lewisham                  | 0   | 0   | 0  | 0    | 35         |
| Merton                    | 0   | 0   | 0  | 0    | 35         |
| Newham                    | 0   | 0   | 0  | 0    | 35         |
| Redbridge                 | 0   | 0   | 0  | 0    | 35         |
| Richmond upon Thames      | 0   | 0   | 0  | 0    | 35         |
| Southwark                 | 0   | 0   | 0  | 0    | 35         |
| Sutton                    | 0   | 0   | 0  | 0    | 35         |
| Tower Hamlets             | 0   | 0   | 0  | 0    | 35         |
| Waltham Forest            | 0   | 0   | 0  | 0    | 35         |
| Wandsworth                | 0   | 0   | 0  | 0    | 35         |
| Westminster               | 0   | 0   | 0  | 0    | 35         |
| North East England        | 0   | 0   | 0  | 0    | 35         |
| County Durham             | 0   | 0   | 0  | 0    | 35         |
| Darlington                | 0   | 0   | 0  | 0    | 35         |
| Gateshead                 | 0   | 0   | 0  | 0    | 35         |
| Hartlepool                | 0   | 0   | 0  | 0    | 35         |
| Middlesbrough             | 0   | 0   | 0  | 0    | 35         |
| Newcastle upon Tyne       | 0   | 0   | 0  | 0    | 35         |
| North Tyneside            | 0   | 0   | 0  | 0    | 35         |
| Northumberland            | 0   | 0   | 0  | 0    | 35         |
| Redcar and Cleveland      | 0   | 0   | 0  | 0    | 35         |
| South Tyneside            | 0   | 0   | 0  | 0    | 35         |
| Stockton-on-Tees          | 0   | 0   | 0  | 0    | 35         |
| Sunderland                | 0   | 0   | 0  | 0    | 35         |
| North West England        | 0   | 0   | 0  | 0    | 35         |
| Blackburn with Darwen     | 0   | 0   | 0  | 0    | 35         |
| Blackpool                 | 0   | 0   | 0  | 0    | 35         |
| Bolton                    | 0   | 0   | 0  | 0    | 35         |
| Bury                      | 0   | 0   | 0  | 0    | 35         |
| Cheshire East             | 0   | 0   | 0  | 0    | 35         |
| Cheshire West and Chester | 0   | 0   | 0  | 0    | 35         |
| Cumbria                   | 0   | 0   | 0  | 0    | 35         |
| Halton                    | 0   | 0   | 0  | 0    | 35         |
| Knowsley                  | 0   | 0   | 0  | 0    | 35         |
| Lancashire                | 0   | 0   | 0  | 0    | 35         |
| Liverpool                 | 0   | 0   | 0  | 0    | 35         |
| Manchester                | 0   | 0   | 0  | 0    | 35         |
| Oldham                    | 0   | 0   | 0  | 0    | 35         |
| Rochdale                  | 0   | 0   | 0  | 0    | 35         |
| Salford                   | 0   | 0   | 0  | 0    | 35         |
| Sefton                    | 0   | 0   | 0  | 0    | 35         |
| St Helens                 | 0   | 0   | 0  | 0    | 35         |
| Stockport                 | 0   | 0   | 0  | 0    | 35         |
| Tameside                  | 0   | 0   | 0  | 0    | 35         |
| Trafford                  | 0   | 0   | 0  | 0    | 35         |
| Warrington                | 0   | 0   | 0  | 0    | 35         |
| Wigan                     | 0   | 0   | 0  | 0    | 35         |
| Wirral                    | 0   | 0   | 0  | 0    | 35         |

**Appendix Table 7. Number of all-cause mortality data sources by type and location, 1950–2016**

| Geography                    | SBH | CBH | HH | SIBS | VR/SRS/DSP |
|------------------------------|-----|-----|----|------|------------|
| South East England           | 0   | 0   | 0  | 0    | 35         |
| Bracknell Forest             | 0   | 0   | 0  | 0    | 35         |
| Brighton and Hove            | 0   | 0   | 0  | 0    | 35         |
| Buckinghamshire              | 0   | 0   | 0  | 0    | 35         |
| East Sussex                  | 0   | 0   | 0  | 0    | 35         |
| Hampshire                    | 0   | 0   | 0  | 0    | 35         |
| Isle of Wight                | 0   | 0   | 0  | 0    | 35         |
| Kent                         | 0   | 0   | 0  | 0    | 35         |
| Medway                       | 0   | 0   | 0  | 0    | 35         |
| Milton Keynes                | 0   | 0   | 0  | 0    | 35         |
| Oxfordshire                  | 0   | 0   | 0  | 0    | 35         |
| Portsmouth                   | 0   | 0   | 0  | 0    | 35         |
| Reading                      | 0   | 0   | 0  | 0    | 35         |
| Slough                       | 0   | 0   | 0  | 0    | 35         |
| Southampton                  | 0   | 0   | 0  | 0    | 35         |
| Surrey                       | 0   | 0   | 0  | 0    | 35         |
| West Berkshire               | 0   | 0   | 0  | 0    | 35         |
| West Sussex                  | 0   | 0   | 0  | 0    | 35         |
| Windsor and Maidenhead       | 0   | 0   | 0  | 0    | 35         |
| Wokingham                    | 0   | 0   | 0  | 0    | 35         |
| South West England           | 0   | 0   | 0  | 0    | 35         |
| Bath and North East Somerset | 0   | 0   | 0  | 0    | 35         |
| Bournemouth                  | 0   | 0   | 0  | 0    | 35         |
| Bristol, City of             | 0   | 0   | 0  | 0    | 35         |
| Cornwall                     | 0   | 0   | 0  | 0    | 35         |
| Devon                        | 0   | 0   | 0  | 0    | 35         |
| Dorset                       | 0   | 0   | 0  | 0    | 35         |
| Gloucestershire              | 0   | 0   | 0  | 0    | 35         |
| North Somerset               | 0   | 0   | 0  | 0    | 35         |
| Plymouth                     | 0   | 0   | 0  | 0    | 35         |
| Poole                        | 0   | 0   | 0  | 0    | 35         |
| Somerset                     | 0   | 0   | 0  | 0    | 35         |
| South Gloucestershire        | 0   | 0   | 0  | 0    | 35         |
| Swindon                      | 0   | 0   | 0  | 0    | 35         |
| Torbay                       | 0   | 0   | 0  | 0    | 35         |
| Wiltshire                    | 0   | 0   | 0  | 0    | 35         |
| West Midlands                | 0   | 0   | 0  | 0    | 35         |
| Birmingham                   | 0   | 0   | 0  | 0    | 35         |
| Coventry                     | 0   | 0   | 0  | 0    | 35         |
| Dudley                       | 0   | 0   | 0  | 0    | 35         |
| Herefordshire, County of     | 0   | 0   | 0  | 0    | 35         |
| Sandwell                     | 0   | 0   | 0  | 0    | 35         |
| Shropshire                   | 0   | 0   | 0  | 0    | 35         |
| Solihull                     | 0   | 0   | 0  | 0    | 35         |
| Staffordshire                | 0   | 0   | 0  | 0    | 35         |
| Stoke-on-Trent               | 0   | 0   | 0  | 0    | 35         |
| Telford and Wrekin           | 0   | 0   | 0  | 0    | 35         |
| Walsall                      | 0   | 0   | 0  | 0    | 35         |
| Warwickshire                 | 0   | 0   | 0  | 0    | 35         |

**Appendix Table 7. Number of all-cause mortality data sources by type and location, 1950–2016**

| Geography                   | SBH | CBH | HH | SIBS | VR/SRS/DSP |
|-----------------------------|-----|-----|----|------|------------|
| Wolverhampton               | 0   | 0   | 0  | 0    | 35         |
| Worcestershire              | 0   | 0   | 0  | 0    | 35         |
| Yorkshire and the Humber    | 0   | 0   | 0  | 0    | 35         |
| Barnsley                    | 0   | 0   | 0  | 0    | 35         |
| Bradford                    | 0   | 0   | 0  | 0    | 35         |
| Calderdale                  | 0   | 0   | 0  | 0    | 35         |
| Doncaster                   | 0   | 0   | 0  | 0    | 35         |
| East Riding of Yorkshire    | 0   | 0   | 0  | 0    | 35         |
| Kingston upon Hull, City of | 0   | 0   | 0  | 0    | 35         |
| Kirklees                    | 0   | 0   | 0  | 0    | 35         |
| Leeds                       | 0   | 0   | 0  | 0    | 35         |
| North East Lincolnshire     | 0   | 0   | 0  | 0    | 35         |
| North Lincolnshire          | 0   | 0   | 0  | 0    | 35         |
| North Yorkshire             | 0   | 0   | 0  | 0    | 35         |
| Rotherham                   | 0   | 0   | 0  | 0    | 35         |
| Sheffield                   | 0   | 0   | 0  | 0    | 35         |
| Wakefield                   | 0   | 0   | 0  | 0    | 35         |
| York                        | 0   | 0   | 0  | 0    | 35         |
| Northern Ireland            | 0   | 0   | 0  | 0    | 64         |
| Scotland                    | 0   | 0   | 0  | 0    | 65         |
| Wales                       | 0   | 0   | 0  | 0    | 33         |
| Argentina                   | 3   | 0   | 0  | 0    | 59         |
| Chile                       | 4   | 0   | 0  | 0    | 65         |
| Uruguay                     | 5   | 0   | 0  | 0    | 64         |
| Canada                      | 0   | 0   | 0  | 0    | 67         |
| Greenland                   | 0   | 0   | 0  | 0    | 57         |
| United States               | 0   | 0   | 0  | 0    | 66         |
| Alabama                     | 0   | 0   | 0  | 0    | 47         |
| Alaska                      | 0   | 0   | 0  | 0    | 47         |
| Arizona                     | 0   | 0   | 0  | 0    | 47         |
| Arkansas                    | 0   | 0   | 0  | 0    | 47         |
| California                  | 0   | 0   | 0  | 0    | 47         |
| Colorado                    | 0   | 0   | 0  | 0    | 47         |
| Connecticut                 | 0   | 0   | 0  | 0    | 47         |
| Delaware                    | 0   | 0   | 0  | 0    | 47         |
| District of Columbia        | 0   | 0   | 0  | 0    | 47         |
| Florida                     | 0   | 0   | 0  | 0    | 47         |
| Georgia                     | 0   | 0   | 0  | 0    | 47         |
| Hawaii                      | 0   | 0   | 0  | 0    | 47         |
| Idaho                       | 0   | 0   | 0  | 0    | 47         |
| Illinois                    | 0   | 0   | 0  | 0    | 47         |
| Indiana                     | 0   | 0   | 0  | 0    | 47         |
| Iowa                        | 0   | 0   | 0  | 0    | 47         |
| Kansas                      | 0   | 0   | 0  | 0    | 47         |
| Kentucky                    | 0   | 0   | 0  | 0    | 47         |
| Louisiana                   | 0   | 0   | 0  | 0    | 47         |
| Maine                       | 0   | 0   | 0  | 0    | 47         |
| Maryland                    | 0   | 0   | 0  | 0    | 47         |
| Massachusetts               | 0   | 0   | 0  | 0    | 47         |

**Appendix Table 7. Number of all-cause mortality data sources by type and location, 1950–2016**

| Geography                        | SBH | CBH | HH | SIBS | VR/SRS/DSP |
|----------------------------------|-----|-----|----|------|------------|
| Michigan                         | 0   | 0   | 0  | 0    | 47         |
| Minnesota                        | 0   | 0   | 0  | 0    | 47         |
| Mississippi                      | 0   | 0   | 0  | 0    | 47         |
| Missouri                         | 0   | 0   | 0  | 0    | 47         |
| Montana                          | 0   | 0   | 0  | 0    | 47         |
| Nebraska                         | 0   | 0   | 0  | 0    | 47         |
| Nevada                           | 0   | 0   | 0  | 0    | 47         |
| New Hampshire                    | 0   | 0   | 0  | 0    | 47         |
| New Jersey                       | 0   | 0   | 0  | 0    | 47         |
| New Mexico                       | 0   | 0   | 0  | 0    | 47         |
| New York                         | 0   | 0   | 0  | 0    | 47         |
| North Carolina                   | 0   | 0   | 0  | 0    | 47         |
| North Dakota                     | 0   | 0   | 0  | 0    | 47         |
| Ohio                             | 0   | 0   | 0  | 0    | 47         |
| Oklahoma                         | 0   | 0   | 0  | 0    | 47         |
| Oregon                           | 0   | 0   | 0  | 0    | 47         |
| Pennsylvania                     | 0   | 0   | 0  | 0    | 47         |
| Rhode Island                     | 0   | 0   | 0  | 0    | 47         |
| South Carolina                   | 0   | 0   | 0  | 0    | 47         |
| South Dakota                     | 0   | 0   | 0  | 0    | 47         |
| Tennessee                        | 0   | 0   | 0  | 0    | 47         |
| Texas                            | 0   | 0   | 0  | 0    | 47         |
| Utah                             | 0   | 0   | 0  | 0    | 47         |
| Vermont                          | 0   | 0   | 0  | 0    | 47         |
| Virginia                         | 0   | 0   | 0  | 0    | 47         |
| Washington                       | 0   | 0   | 0  | 0    | 47         |
| West Virginia                    | 0   | 0   | 0  | 0    | 47         |
| Wisconsin                        | 0   | 0   | 0  | 0    | 47         |
| Wyoming                          | 0   | 0   | 0  | 0    | 47         |
| Antigua and Barbuda              | 0   | 0   | 0  | 0    | 56         |
| The Bahamas                      | 0   | 0   | 0  | 0    | 47         |
| Barbados                         | 0   | 0   | 0  | 0    | 60         |
| Belize                           | 6   | 2   | 0  | 0    | 64         |
| Bermuda                          | 1   | 0   | 0  | 0    | 66         |
| Cuba                             | 1   | 0   | 0  | 0    | 56         |
| Dominica                         | 0   | 0   | 0  | 0    | 63         |
| Dominican Republic               | 14  | 10  | 0  | 2    | 61         |
| Grenada                          | 0   | 0   | 0  | 0    | 54         |
| Guyana                           | 7   | 5   | 0  | 0    | 44         |
| Haiti                            | 8   | 7   | 0  | 2    | 0          |
| Jamaica                          | 5   | 2   | 1  | 0    | 45         |
| Puerto Rico                      | 1   | 1   | 0  | 0    | 65         |
| Saint Lucia                      | 0   | 0   | 0  | 0    | 56         |
| Saint Vincent and the Grenadines | 0   | 0   | 0  | 0    | 49         |
| Suriname                         | 2   | 0   | 0  | 0    | 52         |
| Trinidad and Tobago              | 4   | 2   | 0  | 0    | 61         |
| Virgin Islands, U.S.             | 0   | 0   | 0  | 0    | 49         |
| Bolivia                          | 12  | 5   | 0  | 3    | 16         |
| Ecuador                          | 17  | 6   | 0  | 2    | 61         |



**Appendix Table 7. Number of all-cause mortality data sources by type and location, 1950–2016**

| Geography                       | SBH | CBH | HH | SIBS | VR/SRS/DSP |
|---------------------------------|-----|-----|----|------|------------|
| Peru                            | 19  | 13  | 0  | 5    | 62         |
| Colombia                        | 11  | 7   | 0  | 0    | 60         |
| Costa Rica                      | 7   | 3   | 0  | 0    | 64         |
| El Salvador                     | 10  | 6   | 2  | 3    | 64         |
| Guatemala                       | 8   | 6   | 0  | 1    | 63         |
| Honduras                        | 10  | 6   | 1  | 1    | 37         |
| Mexico                          | 15  | 3   | 0  | 0    | 66         |
| Aguascalientes                  | 14  | 1   | 0  | 0    | 37         |
| Baja California                 | 14  | 1   | 0  | 0    | 37         |
| Baja California Sur             | 14  | 1   | 0  | 0    | 37         |
| Campeche                        | 14  | 1   | 0  | 0    | 37         |
| Chiapas                         | 14  | 1   | 0  | 0    | 36         |
| Chihuahua                       | 14  | 1   | 0  | 0    | 37         |
| Coahuila                        | 14  | 1   | 0  | 0    | 37         |
| Colima                          | 14  | 1   | 0  | 0    | 37         |
| Distrito Federal                | 14  | 1   | 0  | 0    | 37         |
| Durango                         | 14  | 1   | 0  | 0    | 37         |
| Guanajuato                      | 14  | 1   | 0  | 0    | 37         |
| Guerrero                        | 14  | 1   | 0  | 0    | 37         |
| Hidalgo                         | 13  | 1   | 0  | 0    | 37         |
| Jalisco                         | 14  | 1   | 0  | 0    | 37         |
| Mexico                          | 14  | 1   | 0  | 0    | 31         |
| Michoacan de Ocampo             | 14  | 1   | 0  | 0    | 37         |
| Morelos                         | 14  | 1   | 0  | 0    | 37         |
| Nayarit                         | 14  | 1   | 0  | 0    | 37         |
| Nuevo Leon                      | 14  | 1   | 0  | 0    | 37         |
| Oaxaca                          | 14  | 1   | 0  | 0    | 37         |
| Puebla                          | 14  | 1   | 0  | 0    | 37         |
| Queretaro                       | 14  | 1   | 0  | 0    | 33         |
| Quintana Roo                    | 14  | 1   | 0  | 0    | 37         |
| San Luis Potosi                 | 14  | 1   | 0  | 0    | 37         |
| Sinaloa                         | 14  | 1   | 0  | 0    | 37         |
| Sonora                          | 14  | 1   | 0  | 0    | 32         |
| Tabasco                         | 14  | 1   | 0  | 0    | 37         |
| Tamaulipas                      | 14  | 1   | 0  | 0    | 37         |
| Tlaxcala                        | 14  | 1   | 0  | 0    | 31         |
| Veracruz de Ignacio de la Llave | 14  | 1   | 0  | 0    | 37         |
| Yucatan                         | 14  | 1   | 0  | 0    | 37         |
| Zacatecas                       | 14  | 1   | 0  | 0    | 36         |
| Nicaragua                       | 12  | 5   | 0  | 1    | 50         |
| Panama                          | 8   | 1   | 0  | 0    | 64         |
| Venezuela                       | 4   | 1   | 0  | 0    | 63         |
| Brazil                          | 25  | 1   | 0  | 1    | 42         |
| Acre                            | 11  | 1   | 0  | 0    | 37         |
| Alagoas                         | 24  | 2   | 0  | 0    | 37         |
| Amapa                           | 11  | 1   | 0  | 0    | 37         |
| Amazonas                        | 12  | 1   | 0  | 0    | 37         |
| Bahia                           | 24  | 2   | 0  | 0    | 37         |
| Ceara                           | 24  | 2   | 0  | 0    | 30         |

**Appendix Table 7. Number of all-cause mortality data sources by type and location, 1950–2016**

| Geography           | SBH | CBH | HH | SIBS | VR/SRS/DSP |
|---------------------|-----|-----|----|------|------------|
| Distrito Federal    | 24  | 1   | 0  | 0    | 37         |
| Espirito Santo      | 23  | 1   | 0  | 0    | 37         |
| Goiás               | 24  | 1   | 0  | 0    | 31         |
| Maranhao            | 23  | 2   | 0  | 0    | 31         |
| Mato Grosso         | 24  | 1   | 0  | 0    | 37         |
| Mato Grosso do Sul  | 22  | 1   | 0  | 0    | 36         |
| Minas Gerais        | 24  | 1   | 0  | 0    | 37         |
| Para                | 12  | 1   | 0  | 0    | 36         |
| Paraíba             | 24  | 2   | 0  | 0    | 36         |
| Parana              | 24  | 1   | 0  | 0    | 37         |
| Pernambuco          | 24  | 2   | 0  | 0    | 37         |
| Piauí               | 23  | 2   | 0  | 0    | 34         |
| Rio de Janeiro      | 24  | 1   | 0  | 0    | 37         |
| Rio Grande do Norte | 24  | 2   | 0  | 0    | 36         |
| Rio Grande do Sul   | 24  | 1   | 0  | 0    | 37         |
| Rondonia            | 11  | 1   | 0  | 0    | 37         |
| Roraima             | 11  | 1   | 0  | 0    | 37         |
| Santa Catarina      | 23  | 1   | 0  | 0    | 37         |
| Sao Paulo           | 23  | 1   | 0  | 0    | 37         |
| Sergipe             | 24  | 2   | 0  | 0    | 37         |
| Tocantins           | 9   | 1   | 0  | 0    | 25         |
| Paraguay            | 10  | 5   | 0  | 1    | 62         |
| Afghanistan         | 6   | 0   | 1  | 0    | 0          |
| Algeria             | 5   | 4   | 0  | 0    | 18         |
| Bahrain             | 4   | 2   | 0  | 0    | 32         |
| Egypt               | 13  | 26  | 0  | 0    | 63         |
| Iran                | 2   | 5   | 0  | 0    | 21         |
| Iraq                | 7   | 6   | 2  | 2    | 15         |
| Jordan              | 11  | 6   | 0  | 1    | 34         |
| Kuwait              | 3   | 1   | 0  | 0    | 49         |
| Lebanon             | 4   | 2   | 1  | 1    | 7          |
| Libya               | 4   | 1   | 0  | 0    | 12         |
| Morocco             | 9   | 7   | 0  | 2    | 0          |
| Palestine           | 6   | 7   | 0  | 0    | 13         |
| Oman                | 4   | 3   | 0  | 0    | 10         |
| Qatar               | 1   | 2   | 0  | 0    | 32         |
| Saudi Arabia        | 2   | 1   | 1  | 0    | 14         |
| 'Asir               | 0   | 0   | 0  | 0    | 14         |
| Bahah               | 0   | 0   | 0  | 0    | 11         |
| Eastern Province    | 0   | 0   | 0  | 0    | 11         |
| Ha'il               | 0   | 0   | 0  | 0    | 14         |
| Jawf                | 0   | 0   | 0  | 0    | 11         |
| Jizan               | 0   | 0   | 0  | 0    | 14         |
| Madinah             | 0   | 0   | 0  | 0    | 14         |
| Makkah              | 0   | 0   | 0  | 0    | 11         |
| Najran              | 0   | 0   | 0  | 0    | 14         |
| Northern Borders    | 0   | 0   | 0  | 0    | 11         |
| Qassim              | 0   | 0   | 0  | 0    | 13         |
| Riyadh              | 0   | 0   | 0  | 0    | 10         |

**Appendix Table 7. Number of all-cause mortality data sources by type and location, 1950–2016**

| Geography                | SBH | CBH | HH | SIBS | VR/SRS/DSP |
|--------------------------|-----|-----|----|------|------------|
| Tabuk                    | 0   | 0   | 0  | 0    | 13         |
| Sudan                    | 8   | 8   | 0  | 1    | 0          |
| Syria                    | 6   | 3   | 1  | 0    | 23         |
| Tunisia                  | 7   | 5   | 0  | 0    | 20         |
| Turkey                   | 14  | 6   | 0  | 0    | 26         |
| United Arab Emirates     | 2   | 1   | 2  | 0    | 11         |
| Yemen                    | 6   | 7   | 0  | 0    | 0          |
| Bangladesh               | 13  | 12  | 3  | 3    | 14         |
| Bhutan                   | 2   | 1   | 0  | 1    | 0          |
| India                    | 14  | 5   | 0  | 0    | 43         |
| Andhra Pradesh           | 3   | 2   | 0  | 0    | 2          |
| Andhra Pradesh, Rural    | 10  | 5   | 0  | 0    | 2          |
| Andhra Pradesh, Urban    | 10  | 5   | 0  | 0    | 2          |
| Arunachal Pradesh        | 9   | 4   | 0  | 0    | 0          |
| Arunachal Pradesh, Rural | 10  | 4   | 0  | 0    | 0          |
| Arunachal Pradesh, Urban | 11  | 4   | 0  | 0    | 29         |
| Assam                    | 14  | 5   | 0  | 0    | 21         |
| Assam, Rural             | 14  | 5   | 0  | 0    | 20         |
| Assam, Urban             | 14  | 5   | 0  | 0    | 32         |
| Bihar                    | 15  | 5   | 0  | 0    | 12         |
| Bihar, Rural             | 15  | 5   | 0  | 0    | 11         |
| Bihar, Urban             | 14  | 5   | 0  | 0    | 23         |
| Chhattisgarh             | 11  | 3   | 0  | 0    | 8          |
| Chhattisgarh, Rural      | 10  | 3   | 0  | 0    | 7          |
| Chhattisgarh, Urban      | 10  | 3   | 0  | 0    | 20         |
| Delhi                    | 9   | 5   | 0  | 0    | 12         |
| Delhi, Rural             | 10  | 3   | 0  | 0    | 11         |
| Delhi, Urban             | 10  | 5   | 0  | 0    | 43         |
| Goa                      | 8   | 5   | 0  | 0    | 0          |
| Goa, Rural               | 9   | 4   | 0  | 0    | 0          |
| Goa, Urban               | 9   | 3   | 0  | 0    | 0          |
| Gujarat                  | 10  | 5   | 0  | 0    | 21         |
| Gujarat, Rural           | 9   | 5   | 0  | 0    | 20         |
| Gujarat, Urban           | 9   | 5   | 0  | 0    | 31         |
| Haryana                  | 11  | 5   | 0  | 0    | 21         |
| Haryana, Rural           | 11  | 5   | 0  | 0    | 20         |
| Haryana, Urban           | 11  | 5   | 0  | 0    | 49         |
| Himachal Pradesh         | 11  | 5   | 0  | 0    | 21         |
| Himachal Pradesh, Rural  | 11  | 5   | 0  | 0    | 20         |
| Himachal Pradesh, Urban  | 11  | 4   | 0  | 0    | 32         |
| Jammu and Kashmir        | 10  | 5   | 0  | 0    | 2          |
| Jammu and Kashmir, Rural | 10  | 5   | 0  | 0    | 2          |
| Jammu and Kashmir, Urban | 9   | 5   | 0  | 0    | 2          |
| Jharkhand                | 11  | 3   | 0  | 0    | 12         |
| Jharkhand, Rural         | 10  | 3   | 0  | 0    | 11         |
| Jharkhand, Urban         | 10  | 3   | 0  | 0    | 11         |
| Karnataka                | 10  | 5   | 0  | 0    | 21         |
| Karnataka, Rural         | 10  | 5   | 0  | 0    | 20         |
| Karnataka, Urban         | 10  | 5   | 0  | 0    | 20         |

**Appendix Table 7. Number of all-cause mortality data sources by type and location, 1950–2016**

| Geography             | SBH | CBH | HH | SIBS | VR/SRS/DSP |
|-----------------------|-----|-----|----|------|------------|
| Kerala                | 10  | 5   | 0  | 0    | 21         |
| Kerala, Rural         | 10  | 5   | 0  | 0    | 20         |
| Kerala, Urban         | 10  | 5   | 0  | 0    | 49         |
| Madhya Pradesh        | 15  | 5   | 0  | 0    | 12         |
| Madhya Pradesh, Rural | 15  | 5   | 0  | 0    | 11         |
| Madhya Pradesh, Urban | 15  | 5   | 0  | 0    | 11         |
| Maharashtra           | 10  | 5   | 0  | 0    | 21         |
| Maharashtra, Rural    | 10  | 5   | 0  | 0    | 20         |
| Maharashtra, Urban    | 10  | 5   | 0  | 0    | 49         |
| Manipur               | 10  | 5   | 0  | 0    | 0          |
| Manipur, Rural        | 10  | 5   | 0  | 0    | 0          |
| Manipur, Urban        | 10  | 4   | 0  | 0    | 29         |
| Meghalaya             | 10  | 5   | 0  | 0    | 0          |
| Meghalaya, Rural      | 10  | 5   | 0  | 0    | 0          |
| Meghalaya, Urban      | 10  | 5   | 0  | 0    | 12         |
| Mizoram               | 11  | 5   | 0  | 0    | 0          |
| Mizoram, Rural        | 11  | 4   | 0  | 0    | 0          |
| Mizoram, Urban        | 11  | 5   | 0  | 0    | 0          |
| Nagaland              | 8   | 4   | 0  | 0    | 0          |
| Nagaland, Rural       | 10  | 4   | 0  | 0    | 0          |
| Nagaland, Urban       | 10  | 4   | 0  | 0    | 29         |
| Orissa                | 15  | 5   | 0  | 0    | 21         |
| Orissa, Rural         | 15  | 5   | 0  | 0    | 20         |
| Orissa, Urban         | 15  | 5   | 0  | 0    | 52         |
| Punjab                | 10  | 5   | 0  | 0    | 21         |
| Punjab, Rural         | 10  | 5   | 0  | 0    | 20         |
| Punjab, Urban         | 10  | 5   | 0  | 0    | 20         |
| Rajasthan             | 14  | 5   | 0  | 0    | 21         |
| Rajasthan, Rural      | 14  | 5   | 0  | 0    | 20         |
| Rajasthan, Urban      | 14  | 5   | 0  | 0    | 20         |
| Sikkim                | 9   | 3   | 0  | 0    | 0          |
| Sikkim, Rural         | 9   | 3   | 0  | 0    | 0          |
| Sikkim, Urban         | 9   | 3   | 0  | 0    | 11         |
| Tamil Nadu            | 10  | 5   | 0  | 0    | 21         |
| Tamil Nadu, Rural     | 10  | 5   | 0  | 0    | 20         |
| Tamil Nadu, Urban     | 10  | 5   | 0  | 0    | 38         |
| Telangana             | 3   | 2   | 0  | 0    | 2          |
| Telangana, Rural      | 2   | 2   | 0  | 0    | 2          |
| Telangana, Urban      | 2   | 2   | 0  | 0    | 2          |
| Tripura               | 10  | 5   | 0  | 0    | 0          |
| Tripura, Rural        | 10  | 5   | 0  | 0    | 0          |
| Tripura, Urban        | 9   | 5   | 0  | 0    | 0          |
| Uttar Pradesh         | 15  | 5   | 0  | 0    | 16         |
| Uttar Pradesh, Rural  | 15  | 5   | 0  | 0    | 15         |
| Uttar Pradesh, Urban  | 15  | 5   | 0  | 0    | 44         |
| Uttarakhand           | 10  | 3   | 0  | 0    | 2          |
| Uttarakhand, Rural    | 9   | 3   | 0  | 0    | 2          |
| Uttarakhand, Urban    | 9   | 3   | 0  | 0    | 14         |
| West Bengal           | 11  | 5   | 0  | 0    | 21         |

**Appendix Table 7. Number of all-cause mortality data sources by type and location, 1950–2016**

| Geography                        | SBH | CBH | HH | SIBS | VR/SRS/DSP |
|----------------------------------|-----|-----|----|------|------------|
| West Bengal, Rural               | 10  | 5   | 0  | 0    | 20         |
| West Bengal, Urban               | 11  | 5   | 0  | 0    | 20         |
| The Six Minor Territories        | 4   | 1   | 0  | 0    | 0          |
| The Six Minor Territories, Rural | 3   | 0   | 0  | 0    | 0          |
| The Six Minor Territories, Urban | 3   | 1   | 0  | 0    | 29         |
| Nepal                            | 11  | 7   | 1  | 1    | 0          |
| Pakistan                         | 13  | 8   | 7  | 0    | 17         |
| Angola                           | 3   | 2   | 0  | 0    | 0          |
| Central African Republic         | 5   | 1   | 1  | 1    | 0          |
| Congo                            | 4   | 3   | 0  | 2    | 0          |
| Democratic Republic of the Congo | 5   | 2   | 0  | 2    | 0          |
| Equatorial Guinea                | 1   | 1   | 0  | 0    | 0          |
| Gabon                            | 2   | 2   | 0  | 2    | 0          |
| Burundi                          | 8   | 2   | 1  | 1    | 0          |
| Comoros                          | 4   | 2   | 1  | 1    | 0          |
| Djibouti                         | 3   | 1   | 1  | 0    | 0          |
| Eritrea                          | 3   | 2   | 0  | 1    | 0          |
| Ethiopia                         | 6   | 4   | 1  | 3    | 0          |
| Kenya                            | 17  | 8   | 0  | 4    | 0          |
| Central                          | 6   | 0   | 0  | 1    | 0          |
| Kiambu                           | 12  | 6   | 0  | 1    | 0          |
| Kirinyaga                        | 11  | 6   | 0  | 0    | 0          |
| Murang'a                         | 11  | 6   | 0  | 1    | 0          |
| Nyandarua                        | 11  | 6   | 0  | 1    | 0          |
| Nyeri                            | 11  | 6   | 0  | 1    | 0          |
| Coast                            | 6   | 0   | 0  | 1    | 0          |
| Kilifi                           | 12  | 6   | 0  | 1    | 0          |
| Kwale                            | 11  | 6   | 0  | 1    | 0          |
| Lamu                             | 9   | 4   | 0  | 0    | 0          |
| Mombasa                          | 11  | 7   | 0  | 0    | 0          |
| TaitaTaveta                      | 11  | 6   | 0  | 1    | 0          |
| TanaRiver                        | 9   | 3   | 0  | 1    | 0          |
| Eastern                          | 6   | 0   | 0  | 1    | 0          |
| Embu                             | 13  | 7   | 0  | 0    | 0          |
| Isiolo                           | 10  | 4   | 0  | 0    | 0          |
| Kitui                            | 14  | 7   | 0  | 1    | 0          |
| Machakos                         | 14  | 7   | 0  | 1    | 0          |
| Makueni                          | 8   | 4   | 0  | 1    | 0          |
| Marsabit                         | 8   | 4   | 0  | 0    | 0          |
| Meru                             | 11  | 7   | 0  | 1    | 0          |
| TharakaNithi                     | 7   | 4   | 0  | 1    | 0          |
| Nairobi                          | 5   | 0   | 0  | 1    | 0          |
| Nairobi                          | 11  | 6   | 0  | 1    | 0          |
| North Eastern                    | 3   | 0   | 0  | 1    | 0          |
| Garissa                          | 9   | 3   | 0  | 0    | 0          |
| Mandera                          | 9   | 3   | 0  | 1    | 0          |
| Wajir                            | 9   | 3   | 0  | 0    | 0          |
| Nyanza                           | 6   | 0   | 0  | 1    | 0          |
| HomaBay                          | 8   | 4   | 0  | 1    | 0          |

**Appendix Table 7. Number of all-cause mortality data sources by type and location, 1950–2016**

| Geography       | SBH | CBH | HH | SIBS | VR/SRS/DSP |
|-----------------|-----|-----|----|------|------------|
| Kisii           | 11  | 7   | 0  | 1    | 0          |
| Kisumu          | 11  | 7   | 0  | 1    | 0          |
| Migori          | 6   | 4   | 0  | 1    | 0          |
| Nyamira         | 7   | 4   | 0  | 1    | 0          |
| Siaya           | 12  | 7   | 0  | 1    | 0          |
| Rift Valley     | 6   | 0   | 0  | 1    | 0          |
| Baringo         | 11  | 5   | 0  | 1    | 0          |
| Bomet           | 6   | 3   | 0  | 1    | 0          |
| Elgeyo-Marakwet | 11  | 6   | 0  | 1    | 0          |
| Kajiado         | 11  | 5   | 0  | 1    | 0          |
| Kericho         | 12  | 6   | 0  | 0    | 0          |
| Laikipia        | 11  | 5   | 0  | 0    | 0          |
| Nakuru          | 11  | 6   | 0  | 1    | 0          |
| Nandi           | 12  | 6   | 0  | 1    | 0          |
| Narok           | 11  | 6   | 0  | 1    | 0          |
| Samburu         | 7   | 3   | 0  | 0    | 0          |
| TransNzoia      | 11  | 6   | 0  | 0    | 0          |
| Turkana         | 8   | 3   | 0  | 1    | 0          |
| UasinGishu      | 11  | 6   | 0  | 1    | 0          |
| WestPokot       | 11  | 5   | 0  | 1    | 0          |
| Western         | 6   | 0   | 0  | 1    | 0          |
| Bungoma         | 12  | 6   | 0  | 1    | 0          |
| Busia           | 11  | 6   | 0  | 0    | 0          |
| Kakamega        | 11  | 6   | 0  | 0    | 0          |
| Vihiga          | 6   | 3   | 0  | 1    | 0          |
| Madagascar      | 9   | 4   | 1  | 4    | 9          |
| Malawi          | 18  | 7   | 8  | 5    | 0          |
| Mozambique      | 8   | 4   | 2  | 3    | 0          |
| Rwanda          | 13  | 8   | 0  | 4    | 0          |
| Somalia         | 2   | 1   | 0  | 0    | 0          |
| South Sudan     | 2   | 1   | 0  | 0    | 0          |
| Tanzania        | 13  | 7   | 2  | 4    | 0          |
| Uganda          | 12  | 6   | 1  | 4    | 0          |
| Zambia          | 11  | 5   | 0  | 5    | 0          |
| Botswana        | 6   | 3   | 0  | 0    | 0          |
| Lesotho         | 7   | 5   | 0  | 3    | 0          |
| Namibia         | 6   | 4   | 2  | 4    | 0          |
| South Africa    | 4   | 1   | 3  | 1    | 26         |
| Eastern Cape    | 5   | 1   | 3  | 1    | 18         |
| Free State      | 5   | 1   | 3  | 1    | 18         |
| Gauteng         | 5   | 1   | 3  | 1    | 18         |
| KwaZulu-Natal   | 6   | 1   | 3  | 1    | 18         |
| Limpopo         | 5   | 1   | 3  | 1    | 18         |
| Mpumalanga      | 5   | 1   | 3  | 1    | 18         |
| North-West      | 5   | 1   | 3  | 1    | 18         |
| Northern Cape   | 5   | 1   | 3  | 1    | 18         |
| Western Cape    | 5   | 0   | 3  | 1    | 18         |
| Swaziland       | 4   | 4   | 2  | 1    | 0          |
| Zimbabwe        | 8   | 8   | 3  | 6    | 1          |

**Appendix Table 7. Number of all-cause mortality data sources by type and location, 1950–2016**

| <b>Geography</b>      | <b>SBH</b> | <b>CBH</b> | <b>HH</b> | <b>SIBS</b> | <b>VR/SRS/DSP</b> |
|-----------------------|------------|------------|-----------|-------------|-------------------|
| Benin                 | 6          | 6          | 0         | 2           | 0                 |
| Burkina Faso          | 9          | 7          | 1         | 3           | 0                 |
| Cameroon              | 7          | 5          | 1         | 3           | 0                 |
| Cape Verde            | 3          | 2          | 0         | 0           | 8                 |
| Chad                  | 4          | 4          | 0         | 3           | 0                 |
| Cote d'Ivoire         | 6          | 9          | 1         | 3           | 0                 |
| The Gambia            | 6          | 2          | 0         | 1           | 0                 |
| Ghana                 | 16         | 10         | 1         | 1           | 0                 |
| Guinea                | 5          | 4          | 0         | 3           | 0                 |
| Guinea-Bissau         | 4          | 2          | 0         | 1           | 0                 |
| Liberia               | 6          | 4          | 0         | 2           | 0                 |
| Mali                  | 9          | 5          | 4         | 4           | 0                 |
| Mauritania            | 7          | 4          | 1         | 2           | 0                 |
| Niger                 | 6          | 4          | 0         | 3           | 0                 |
| Nigeria               | 13         | 5          | 0         | 2           | 0                 |
| Sao Tome and Principe | 6          | 2          | 1         | 2           | 13                |
| Senegal               | 11         | 10         | 0         | 2           | 0                 |
| Sierra Leone          | 6          | 2          | 1         | 2           | 0                 |
| Togo                  | 7          | 3          | 0         | 2           | 0                 |

**Appendix Table 8. Number of all-cause mortality data sources by type and year, 1950-2016**

|      | SBH | CBH | HH | SIBS | VR/SRS/DSP |
|------|-----|-----|----|------|------------|
| 1950 | 0   | 0   | 0  | 0    | 67         |
| 1951 | 0   | 0   | 0  | 0    | 68         |
| 1952 | 0   | 0   | 0  | 0    | 73         |
| 1953 | 0   | 0   | 1  | 0    | 74         |
| 1954 | 1   | 0   | 0  | 0    | 75         |
| 1955 | 0   | 0   | 0  | 0    | 77         |
| 1956 | 2   | 0   | 0  | 0    | 78         |
| 1957 | 0   | 0   | 0  | 0    | 78         |
| 1958 | 1   | 0   | 1  | 0    | 79         |
| 1959 | 0   | 0   | 0  | 0    | 86         |
| 1960 | 23  | 0   | 2  | 0    | 88         |
| 1961 | 3   | 0   | 1  | 0    | 88         |
| 1962 | 0   | 0   | 0  | 0    | 85         |
| 1963 | 1   | 0   | 0  | 0    | 87         |
| 1964 | 1   | 0   | 0  | 0    | 90         |
| 1965 | 1   | 0   | 0  | 0    | 87         |
| 1966 | 4   | 0   | 0  | 0    | 84         |
| 1967 | 1   | 0   | 1  | 0    | 84         |
| 1968 | 1   | 0   | 0  | 0    | 138        |
| 1969 | 42  | 0   | 0  | 0    | 138        |
| 1970 | 39  | 0   | 1  | 0    | 135        |
| 1971 | 12  | 0   | 5  | 0    | 137        |
| 1972 | 2   | 0   | 0  | 0    | 136        |
| 1973 | 8   | 0   | 1  | 0    | 136        |
| 1974 | 6   | 4   | 1  | 0    | 140        |
| 1975 | 13  | 4   | 0  | 0    | 141        |
| 1976 | 14  | 7   | 1  | 0    | 143        |
| 1977 | 8   | 4   | 1  | 0    | 146        |
| 1978 | 10  | 8   | 0  | 0    | 143        |
| 1979 | 48  | 2   | 2  | 0    | 231        |
| 1980 | 112 | 4   | 1  | 0    | 254        |
| 1981 | 17  | 2   | 1  | 0    | 419        |
| 1982 | 37  | 1   | 6  | 0    | 424        |
| 1983 | 5   | 1   | 0  | 0    | 417        |
| 1984 | 7   | 1   | 1  | 0    | 426        |
| 1985 | 44  | 2   | 1  | 0    | 429        |
| 1986 | 32  | 7   | 2  | 0    | 437        |
| 1987 | 38  | 15  | 5  | 0    | 439        |
| 1988 | 47  | 35  | 3  | 0    | 426        |
| 1989 | 54  | 7   | 32 | 1    | 436        |
| 1990 | 148 | 7   | 1  | 0    | 441        |
| 1991 | 111 | 18  | 5  | 1    | 440        |
| 1992 | 162 | 120 | 3  | 7    | 438        |
| 1993 | 169 | 45  | 2  | 3    | 434        |



**Appendix Table 8. Number of all-cause mortality data sources by type and year, 1950-2016**

|      | <b>SBH</b> | <b>CBH</b> | <b>HH</b> | <b>SIBS</b> | <b>VR/SRS/DSP</b> |
|------|------------|------------|-----------|-------------|-------------------|
| 1994 | 121        | 12         | 3         | 36          | 438               |
| 1995 | 105        | 13         | 4         | 5           | 478               |
| 1996 | 110        | 45         | 36        | 7           | 495               |
| 1997 | 83         | 15         | 37        | 37          | 503               |
| 1998 | 121        | 135        | 47        | 16          | 506               |
| 1999 | 236        | 16         | 63        | 3           | 519               |
| 2000 | 277        | 21         | 100       | 11          | 524               |
| 2001 | 177        | 27         | 37        | 3           | 524               |
| 2002 | 69         | 12         | 76        | 29          | 530               |
| 2003 | 241        | 58         | 64        | 8           | 521               |
| 2004 | 77         | 46         | 88        | 7           | 553               |
| 2005 | 190        | 184        | 79        | 9           | 519               |
| 2006 | 229        | 22         | 80        | 8           | 556               |
| 2007 | 137        | 22         | 67        | 39          | 556               |
| 2008 | 201        | 74         | 68        | 6           | 557               |
| 2009 | 259        | 14         | 66        | 4           | 553               |
| 2010 | 202        | 17         | 97        | 9           | 552               |
| 2011 | 245        | 63         | 79        | 7           | 512               |
| 2012 | 159        | 27         | 63        | 40          | 532               |
| 2013 | 145        | 37         | 31        | 8           | 504               |
| 2014 | 110        | 78         | 30        | 50          | 449               |
| 2015 | 49         | 96         | 0         | 2           | 331               |
| 2016 | 0          | 4          | 0         | 0           | 1                 |

Appendix Table 9. Life expectancy at birth in 2015, from World Population Prospects 2017, WHO, US Census Bureau, and GBD 2016

| Country                          | GBD 2016 |      | WPP 2017 |      | WHO    |      | US Census Bureau |      |
|----------------------------------|----------|------|----------|------|--------|------|------------------|------|
|                                  | Female   | Male | Female   | Male | Female | Male | Female           | Male |
| Afghanistan                      | 58.9     | 56.9 | 64.6     | 62.0 | 61.9   | 59.3 | 52.3             | 49.5 |
| Albania                          | 80.5     | 74.6 | 80.3     | 76.1 | 80.7   | 75.1 | 81.0             | 75.5 |
| Algeria                          | 78.3     | 76.3 | 77.1     | 74.6 | 77.5   | 73.8 | 78.0             | 75.3 |
| American Samoa                   | 74.3     | 70.3 |          |      |        |      | 78.3             | 72.2 |
| Andorra                          | 85.8     | 79.3 |          |      |        |      | 85.0             | 80.6 |
| Angola                           | 64.7     | 63.3 | 63.8     | 58.2 | 54.0   | 50.9 | 56.8             | 54.5 |
| Antigua and Barbuda              | 79.9     | 74.5 | 78.6     | 73.7 | 78.6   | 74.1 | 78.5             | 74.2 |
| Argentina                        | 79.9     | 73.2 | 80.2     | 72.6 | 79.9   | 72.7 | 80.2             | 73.8 |
| Armenia                          | 79.0     | 71.8 | 77.4     | 71.1 | 77.7   | 71.6 | 78.0             | 71.1 |
| Australia                        | 84.6     | 80.5 | 84.7     | 80.7 | 84.8   | 80.9 | 84.7             | 79.7 |
| Austria                          | 83.8     | 79.0 | 83.8     | 78.9 | 83.9   | 79.0 | 84.2             | 78.8 |
| Azerbaijan                       | 75.4     | 68.1 | 74.9     | 68.8 | 75.8   | 69.6 | 75.5             | 69.2 |
| Bahrain                          | 77.7     | 75.9 | 77.8     | 75.9 | 77.9   | 76.2 | 81.0             | 76.5 |
| Bangladesh                       | 74.7     | 70.1 | 73.8     | 70.6 | 73.1   | 70.6 | 75.1             | 70.8 |
| Barbados                         | 78.8     | 74.4 | 78.1     | 73.3 | 77.9   | 73.1 | 77.6             | 72.8 |
| Belarus                          | 78.6     | 68.0 | 78.1     | 67.0 | 78.0   | 66.5 | 78.4             | 66.9 |
| Belgium                          | 83.3     | 78.4 | 83.3     | 78.5 | 83.5   | 78.6 | 83.6             | 78.3 |
| Belize                           | 74.8     | 69.1 | 73.2     | 67.6 | 73.1   | 67.5 | 70.3             | 67.0 |
| Benin                            | 65.8     | 62.0 | 62.1     | 59.1 | 61.1   | 58.8 | 62.9             | 60.1 |
| Bermuda                          | 82.3     | 75.7 |          |      |        |      | 84.4             | 77.9 |
| Bhutan                           | 75.6     | 71.9 | 70.0     | 69.5 | 70.1   | 69.5 | 70.5             | 68.6 |
| Bolivia                          | 74.1     | 72.0 | 71.2     | 66.2 | 73.3   | 68.2 | 71.8             | 66.1 |
| Bosnia and Herzegovina           | 79.9     | 74.8 | 79.2     | 74.2 | 79.7   | 75.0 | 79.8             | 73.5 |
| Botswana                         | 68.7     | 60.6 | 68.3     | 62.7 | 68.1   | 63.3 | 52.3             | 56.0 |
| Brazil                           | 78.9     | 71.5 | 78.9     | 71.6 | 78.7   | 71.4 | 77.3             | 70.0 |
| Brunei                           | 79.4     | 74.5 | 78.8     | 75.5 | 79.2   | 76.3 | 79.4             | 74.6 |
| Bulgaria                         | 78.5     | 71.6 | 78.1     | 71.2 | 78.0   | 71.1 | 77.9             | 71.1 |
| Burkina Faso                     | 61.6     | 59.0 | 60.4     | 59.1 | 60.5   | 59.1 | 57.2             | 53.1 |
| Burundi                          | 61.2     | 58.8 | 59.0     | 55.1 | 61.6   | 57.7 | 61.8             | 58.5 |
| Cambodia                         | 71.2     | 65.4 | 70.5     | 66.4 | 70.7   | 66.6 | 66.7             | 61.7 |
| Cameroon                         | 61.5     | 57.8 | 58.8     | 56.4 | 58.6   | 55.9 | 59.3             | 56.6 |
| Canada                           | 83.8     | 79.7 | 84.1     | 80.2 | 84.1   | 80.2 | 84.5             | 79.2 |
| Cape Verde                       | 78.4     | 68.4 | 74.5     | 70.6 | 75.0   | 71.3 | 74.2             | 69.6 |
| Central African Republic         | 52.1     | 47.4 | 53.2     | 49.6 | 54.1   | 50.9 | 53.2             | 50.5 |
| Chad                             | 60.7     | 57.7 | 53.7     | 51.3 | 54.5   | 51.7 | 51.0             | 48.6 |
| Chile                            | 83.1     | 77.2 | 81.8     | 76.7 | 83.4   | 77.4 | 81.8             | 75.6 |
| China                            | 79.5     | 73.1 | 77.7     | 74.6 | 77.6   | 74.6 | 77.7             | 73.4 |
| Colombia                         | 80.9     | 75.2 | 77.8     | 70.7 | 78.4   | 71.2 | 78.8             | 72.3 |
| Comoros                          | 68.2     | 66.3 | 65.1     | 61.7 | 65.2   | 61.9 | 66.2             | 61.6 |
| Congo                            | 62.0     | 63.3 | 65.5     | 62.3 | 66.3   | 63.2 | 60.0             | 57.6 |
| Costa Rica                       | 83.5     | 78.4 | 82.1     | 77.3 | 82.2   | 77.1 | 81.2             | 75.8 |
| Cote d'Ivoire                    | 61.5     | 57.0 | 54.5     | 51.7 | 54.4   | 52.3 | 59.5             | 57.2 |
| Croatia                          | 80.5     | 74.2 | 80.7     | 74.1 | 81.2   | 74.7 | 79.0             | 72.5 |
| Cuba                             | 81.2     | 76.6 | 81.6     | 77.6 | 81.4   | 76.9 | 81.0             | 76.2 |
| Cyprus                           | 82.8     | 78.1 | 82.5     | 78.2 | 82.7   | 78.3 | 81.5             | 75.7 |
| Czech Republic                   | 81.8     | 76.1 | 81.5     | 75.6 | 81.7   | 75.9 | 81.6             | 75.5 |
| Democratic Republic of the Congo | 62.0     | 59.8 | 60.6     | 57.7 | 61.5   | 58.3 | 58.5             | 55.4 |

Appendix Table 9. Life expectancy at birth in 2015, from World Population Prospects 2017, WHO, US Census Bureau, and GBD 2016

| Country                        | GBD 2016 |      | WPP 2017 |      | WHO    |      | US Census Bureau |      |
|--------------------------------|----------|------|----------|------|--------|------|------------------|------|
|                                | Female   | Male | Female   | Male | Female | Male | Female           | Male |
| Denmark                        | 82.7     | 78.7 | 82.5     | 78.6 | 82.5   | 78.6 | 81.8             | 76.8 |
| Djibouti                       | 68.2     | 64.0 | 63.8     | 60.5 | 65.3   | 61.8 | 65.4             | 60.3 |
| Dominica                       | 74.6     | 68.8 |          |      |        |      | 79.9             | 73.8 |
| Dominican Republic             | 78.4     | 72.6 | 76.9     | 70.6 | 77.1   | 70.9 | 80.3             | 75.8 |
| Ecuador                        | 80.4     | 75.5 | 78.9     | 73.4 | 79.0   | 73.5 | 79.7             | 73.6 |
| Egypt                          | 74.7     | 69.2 | 73.6     | 69.1 | 73.2   | 68.8 | 73.9             | 71.1 |
| El Salvador                    | 78.9     | 71.2 | 77.7     | 68.5 | 77.9   | 68.8 | 77.9             | 71.1 |
| Equatorial Guinea              | 66.2     | 64.2 | 58.9     | 56.2 | 60.0   | 56.6 | 65.0             | 62.8 |
| Eritrea                        | 64.1     | 62.6 | 66.8     | 62.5 | 67.0   | 62.4 | 67.1             | 62.1 |
| Estonia                        | 81.7     | 72.8 | 81.6     | 72.4 | 82.0   | 72.7 | 81.5             | 71.6 |
| Ethiopia                       | 66.0     | 64.3 | 66.7     | 63.0 | 66.8   | 62.8 | 63.9             | 59.1 |
| Federated States of Micronesia | 67.3     | 63.4 | 70.2     | 68.0 | 70.6   | 68.1 | 74.8             | 70.6 |
| Fiji                           | 67.6     | 63.3 | 73.3     | 67.3 | 73.1   | 67.0 | 75.2             | 69.8 |
| Finland                        | 84.4     | 78.6 | 84.0     | 78.2 | 83.8   | 78.3 | 83.9             | 77.8 |
| France                         | 85.3     | 79.1 | 85.3     | 79.3 | 85.4   | 79.4 | 85.0             | 78.7 |
| Gabon                          | 67.7     | 64.3 | 67.1     | 64.1 | 67.2   | 64.7 | 52.5             | 51.6 |
| Georgia                        | 78.6     | 68.8 | 77.4     | 68.9 | 78.3   | 70.3 | 80.4             | 71.9 |
| Germany                        | 83.3     | 78.4 | 83.2     | 78.5 | 83.4   | 78.7 | 83.0             | 78.3 |
| Ghana                          | 66.9     | 63.9 | 63.4     | 61.4 | 63.9   | 61.0 | 68.7             | 63.8 |
| Greece                         | 83.5     | 78.4 | 83.7     | 78.5 | 83.6   | 78.3 | 83.2             | 77.8 |
| Greenland                      | 73.0     | 67.8 |          |      |        |      | 74.9             | 69.4 |
| Grenada                        | 74.2     | 68.6 | 76.0     | 71.1 | 76.1   | 71.2 | 76.9             | 71.5 |
| Guam                           | 75.9     | 68.9 | 81.9     | 76.9 |        |      | 82.2             | 75.9 |
| Guatemala                      | 75.8     | 69.3 | 76.3     | 69.9 | 75.2   | 68.5 | 74.1             | 70.1 |
| Guinea                         | 61.0     | 59.1 | 60.0     | 58.9 | 59.8   | 58.2 | 61.7             | 58.6 |
| Guinea-Bissau                  | 60.7     | 55.7 | 58.7     | 55.3 | 60.5   | 57.2 | 52.3             | 48.2 |
| Guyana                         | 70.1     | 64.0 | 68.9     | 64.3 | 68.5   | 63.9 | 71.2             | 65.1 |
| Haiti                          | 64.2     | 63.5 | 65.2     | 60.8 | 65.5   | 61.5 | 65.9             | 60.8 |
| Honduras                       | 73.5     | 71.5 | 75.9     | 70.9 | 77.0   | 72.3 | 72.7             | 69.3 |
| Hungary                        | 79.1     | 72.2 | 79.2     | 72.1 | 79.1   | 72.3 | 79.6             | 72.0 |
| Iceland                        | 83.9     | 80.6 | 84.1     | 81.1 | 84.1   | 81.2 | 85.2             | 80.8 |
| India                          | 69.8     | 66.6 | 69.8     | 66.8 | 69.9   | 66.9 | 69.4             | 67.0 |
| Indonesia                      | 73.3     | 69.6 | 71.2     | 67.0 | 71.2   | 67.1 | 75.2             | 69.9 |
| Iran                           | 77.9     | 73.7 | 76.8     | 74.5 | 76.6   | 74.5 | 72.8             | 69.6 |
| Iraq                           | 70.4     | 64.9 | 72.0     | 67.4 | 71.8   | 66.2 | 77.2             | 72.6 |
| Ireland                        | 83.3     | 79.0 | 83.3     | 79.3 | 83.4   | 79.4 | 83.1             | 78.4 |
| Israel                         | 84.1     | 79.9 | 84.0     | 80.5 | 84.3   | 80.6 | 84.2             | 80.4 |
| Italy                          | 84.6     | 79.9 | 85.0     | 80.5 | 84.8   | 80.5 | 84.9             | 79.5 |
| Jamaica                        | 76.8     | 73.1 | 78.2     | 73.4 | 78.6   | 73.9 | 75.2             | 71.9 |
| Japan                          | 86.9     | 80.7 | 86.8     | 80.4 | 86.8   | 80.5 | 88.3             | 81.4 |
| Jordan                         | 78.2     | 75.3 | 75.9     | 72.5 | 75.9   | 72.5 | 75.8             | 73.0 |
| Kazakhstan                     | 76.1     | 67.1 | 74.4     | 64.7 | 74.7   | 65.7 | 75.5             | 65.3 |
| Kenya                          | 68.6     | 64.1 | 68.7     | 64.0 | 65.8   | 61.1 | 65.3             | 62.3 |
| Kiribati                       | 65.3     | 57.9 | 69.4     | 62.9 | 68.8   | 63.7 | 68.4             | 63.4 |
| Kuwait                         | 79.6     | 80.0 | 75.8     | 73.7 | 76.0   | 73.7 | 79.2             | 76.5 |
| Kyrgyzstan                     | 74.9     | 67.3 | 74.7     | 66.7 | 75.1   | 67.2 | 74.8             | 66.2 |
| Laos                           | 69.2     | 64.4 | 67.8     | 64.8 | 67.2   | 64.1 | 66.0             | 61.9 |

Appendix Table 9. Life expectancy at birth in 2015, from World Population Prospects 2017, WHO, US Census Bureau, and GBD 2016

| Country                  | GBD 2016 |      | WPP 2017 |      | WHO    |      | US Census Bureau |      |
|--------------------------|----------|------|----------|------|--------|------|------------------|------|
|                          | Female   | Male | Female   | Male | Female | Male | Female           | Male |
| Latvia                   | 79.7     | 69.9 | 79.0     | 69.3 | 79.2   | 69.6 | 79.1             | 69.6 |
| Lebanon                  | 81.3     | 78.8 | 81.3     | 77.8 | 76.5   | 73.5 | 78.7             | 76.2 |
| Lesotho                  | 52.7     | 46.5 | 55.8     | 51.3 | 55.4   | 51.7 | 53.0             | 52.8 |
| Liberia                  | 64.2     | 63.5 | 62.9     | 61.0 | 62.9   | 59.8 | 60.3             | 56.9 |
| Libya                    | 77.0     | 71.4 | 74.8     | 69.1 | 75.6   | 70.1 | 78.1             | 74.5 |
| Lithuania                | 80.2     | 69.5 | 79.7     | 68.9 | 79.1   | 68.1 | 80.5             | 69.2 |
| Luxembourg               | 83.8     | 80.1 | 83.8     | 79.3 | 84.0   | 79.8 | 84.8             | 79.7 |
| Macedonia                | 77.1     | 72.1 | 77.6     | 73.5 | 77.8   | 73.5 | 78.8             | 73.4 |
| Madagascar               | 63.5     | 61.1 | 67.1     | 64.0 | 67.0   | 63.9 | 67.1             | 64.1 |
| Malawi                   | 61.8     | 57.1 | 64.7     | 59.7 | 59.9   | 56.7 | 62.7             | 58.7 |
| Malaysia                 | 77.8     | 72.9 | 77.5     | 73.0 | 77.3   | 72.7 | 77.7             | 72.0 |
| Maldives                 | 81.1     | 77.5 | 78.2     | 76.1 | 80.2   | 76.9 | 77.8             | 73.1 |
| Mali                     | 62.3     | 60.4 | 58.2     | 56.8 | 58.3   | 58.2 | 57.3             | 53.5 |
| Malta                    | 83.7     | 79.0 | 82.3     | 79.0 | 83.7   | 79.7 | 82.7             | 77.9 |
| Marshall Islands         | 66.9     | 62.5 |          |      |        |      | 75.1             | 70.7 |
| Mauritania               | 69.9     | 70.0 | 64.5     | 61.5 | 64.6   | 61.6 | 65.0             | 60.4 |
| Mauritius                | 77.7     | 71.3 | 78.1     | 71.1 | 77.8   | 71.4 | 79.0             | 71.9 |
| Mexico                   | 78.9     | 73.5 | 79.4     | 74.5 | 79.5   | 73.9 | 78.6             | 72.9 |
| Moldova                  | 76.0     | 68.2 | 75.6     | 67.1 | 76.2   | 67.9 | 74.5             | 66.6 |
| Mongolia                 | 72.8     | 63.6 | 73.2     | 65.0 | 73.2   | 64.7 | 73.8             | 65.0 |
| Montenegro               | 79.6     | 74.3 | 79.2     | 74.5 | 78.1   | 74.1 | 81.6             | 75.5 |
| Morocco                  | 76.2     | 73.3 | 76.7     | 74.3 | 75.4   | 73.3 | 79.9             | 73.6 |
| Mozambique               | 61.9     | 56.0 | 59.7     | 55.5 | 59.4   | 55.7 | 53.7             | 52.2 |
| Myanmar                  | 72.9     | 66.2 | 68.7     | 64.0 | 68.5   | 64.6 | 68.8             | 63.9 |
| Namibia                  | 68.7     | 59.9 | 66.1     | 60.5 | 68.3   | 63.1 | 64.5             | 61.8 |
| Nepal                    | 70.9     | 68.4 | 71.4     | 68.3 | 70.8   | 67.7 | 70.5             | 69.0 |
| Netherlands              | 83.6     | 79.7 | 83.5     | 79.8 | 83.6   | 80.0 | 83.5             | 79.1 |
| New Zealand              | 83.4     | 79.6 | 83.4     | 80.0 | 83.3   | 80.0 | 83.2             | 79.0 |
| Nicaragua                | 80.9     | 75.0 | 78.1     | 72.1 | 77.9   | 71.5 | 75.3             | 70.8 |
| Niger                    | 62.4     | 60.1 | 60.6     | 58.6 | 62.8   | 60.9 | 56.4             | 53.9 |
| Nigeria                  | 65.4     | 62.7 | 53.8     | 52.2 | 55.6   | 53.4 | 54.1             | 52.0 |
| North Korea              | 73.5     | 67.8 | 74.7     | 67.7 | 74.0   | 67.0 | 74.2             | 66.3 |
| Northern Mariana Islands | 77.3     | 73.8 |          |      |        |      | 80.7             | 75.2 |
| Norway                   | 84.1     | 80.1 | 84.0     | 80.0 | 83.7   | 79.8 | 83.8             | 79.7 |
| Oman                     | 79.7     | 75.1 | 79.3     | 75.1 | 79.2   | 75.0 | 77.2             | 73.3 |
| Pakistan                 | 68.4     | 66.1 | 67.3     | 65.3 | 67.5   | 65.5 | 69.4             | 65.5 |
| Palestine                | 73.4     | 70.2 | 75.3     | 71.4 |        |      |                  |      |
| Panama                   | 81.7     | 75.8 | 80.9     | 74.9 | 81.1   | 74.7 | 81.4             | 75.7 |
| Papua New Guinea         | 61.8     | 59.2 | 67.9     | 63.0 | 65.4   | 60.6 | 69.4             | 64.8 |
| Paraguay                 | 76.9     | 71.9 | 75.2     | 70.9 | 76.0   | 72.2 | 79.8             | 74.3 |
| Peru                     | 81.5     | 77.5 | 77.4     | 72.1 | 78.0   | 73.1 | 75.6             | 71.5 |
| Philippines              | 73.6     | 66.5 | 72.5     | 65.7 | 72.0   | 65.3 | 72.6             | 65.5 |
| Poland                   | 81.5     | 73.9 | 81.3     | 73.4 | 81.3   | 73.6 | 81.5             | 73.5 |
| Portugal                 | 83.9     | 77.7 | 83.9     | 77.9 | 83.9   | 78.2 | 82.6             | 75.9 |
| Puerto Rico              | 82.2     | 74.8 | 83.5     | 75.8 |        |      | 82.9             | 75.6 |
| Qatar                    | 81.8     | 79.1 | 79.7     | 77.2 | 80.0   | 77.4 | 80.7             | 76.6 |
| Romania                  | 78.7     | 71.5 | 78.7     | 71.8 | 78.8   | 71.4 | 78.6             | 71.5 |

Appendix Table 9. Life expectancy at birth in 2015, from World Population Prospects 2017, WHO, US Census Bureau, and GBD 2016

| Country                          | GBD 2016 |      | WPP 2017 |      | WHO    |      | US Census Bureau |      |
|----------------------------------|----------|------|----------|------|--------|------|------------------|------|
|                                  | Female   | Male | Female   | Male | Female | Male | Female           | Male |
| Russia                           | 76.4     | 65.2 | 76.3     | 65.1 | 76.3   | 64.7 | 76.6             | 64.7 |
| Rwanda                           | 69.0     | 65.6 | 68.4     | 64.3 | 71.1   | 60.9 | 61.3             | 58.1 |
| Saint Lucia                      | 79.3     | 73.0 | 78.0     | 72.7 | 77.9   | 72.6 | 80.5             | 74.9 |
| Saint Vincent and the Grenadines | 74.7     | 68.6 | 75.3     | 70.9 | 75.2   | 71.3 | 77.1             | 73.1 |
| Samoa                            | 73.7     | 69.7 | 78.0     | 71.7 | 77.5   | 70.9 | 76.5             | 70.6 |
| Sao Tome and Principe            | 71.8     | 68.8 | 68.6     | 64.3 | 69.4   | 65.6 | 65.9             | 63.3 |
| Saudi Arabia                     | 78.1     | 75.4 | 76.1     | 73.1 | 76.0   | 73.2 | 77.2             | 73.0 |
| Senegal                          | 67.5     | 64.3 | 68.5     | 64.6 | 68.6   | 64.6 | 63.4             | 59.3 |
| Serbia                           | 78.6     | 72.9 | 77.9     | 72.2 | 78.4   | 72.9 | 78.3             | 72.4 |
| Seychelles                       | 77.2     | 70.2 | 78.3     | 69.2 | 78.0   | 69.1 | 79.2             | 69.9 |
| Sierra Leone                     | 58.7     | 56.6 | 51.8     | 50.7 | 50.8   | 49.3 | 60.4             | 55.2 |
| Singapore                        | 86.0     | 81.2 | 84.9     | 80.7 | 86.1   | 80.0 | 87.5             | 82.1 |
| Slovakia                         | 80.3     | 73.3 | 80.1     | 73.1 | 80.2   | 72.9 | 80.7             | 73.3 |
| Slovenia                         | 83.7     | 77.7 | 83.6     | 77.8 | 83.7   | 77.9 | 81.9             | 74.4 |
| Solomon Islands                  | 63.9     | 61.7 | 71.9     | 68.9 | 70.8   | 67.9 | 77.9             | 72.5 |
| Somalia                          | 57.7     | 56.8 | 57.6     | 54.3 | 56.6   | 53.5 | 54.1             | 49.9 |
| South Africa                     | 64.8     | 58.7 | 65.1     | 58.2 | 66.2   | 59.3 | 63.9             | 60.8 |
| South Korea                      | 84.2     | 77.7 | 84.9     | 78.6 | 85.5   | 78.8 | 85.7             | 79.2 |
| South Sudan                      | 60.0     | 57.8 | 57.3     | 55.3 | 58.6   | 56.1 | 62.3             | 59.3 |
| Spain                            | 85.6     | 80.2 | 85.7     | 80.1 | 85.5   | 80.1 | 84.8             | 78.6 |
| Sri Lanka                        | 80.8     | 73.6 | 78.5     | 71.7 | 78.3   | 71.6 | 80.2             | 73.1 |
| Sudan                            | 69.9     | 66.1 | 65.8     | 62.6 | 65.9   | 62.4 | 65.9             | 61.6 |
| Suriname                         | 74.2     | 68.2 | 74.5     | 68.1 | 74.7   | 68.6 | 74.5             | 69.6 |
| Swaziland                        | 60.6     | 52.1 | 59.8     | 53.4 | 61.1   | 56.6 | 50.5             | 51.6 |
| Sweden                           | 83.9     | 80.2 | 84.1     | 80.5 | 84.0   | 80.7 | 84.0             | 80.1 |
| Switzerland                      | 85.2     | 81.0 | 85.1     | 81.1 | 85.3   | 81.3 | 84.9             | 80.2 |
| Syria                            | 73.5     | 63.4 | 77.0     | 65.1 | 69.9   | 59.9 | 77.2             | 72.3 |
| Taiwan (Province of China)       | 82.8     | 76.7 | 82.7     | 76.9 |        |      | 83.3             | 76.9 |
| Tajikistan                       | 74.1     | 69.1 | 74.0     | 68.1 | 73.6   | 66.6 | 70.7             | 64.3 |
| Tanzania                         | 65.3     | 61.7 | 66.6     | 62.9 | 63.8   | 59.9 | 63.1             | 60.3 |
| Thailand                         | 80.7     | 74.5 | 78.9     | 71.4 | 78.0   | 71.9 | 77.8             | 71.2 |
| The Bahamas                      | 76.2     | 71.1 | 78.5     | 72.4 | 79.1   | 72.9 | 74.7             | 69.8 |
| The Gambia                       | 69.0     | 65.1 | 62.3     | 59.6 | 62.5   | 59.8 | 67.0             | 62.3 |
| Timor-Leste                      | 73.5     | 71.6 | 70.4     | 66.8 | 70.1   | 66.6 | 69.4             | 66.2 |
| Togo                             | 64.6     | 59.6 | 60.6     | 59.0 | 61.1   | 58.6 | 67.2             | 61.9 |
| Tonga                            | 73.2     | 67.4 | 75.9     | 69.9 | 76.4   | 70.6 | 77.6             | 74.5 |
| Trinidad and Tobago              | 76.9     | 69.2 | 74.2     | 67.1 | 74.8   | 67.9 | 75.6             | 69.7 |
| Tunisia                          | 80.3     | 74.5 | 77.6     | 73.5 | 77.8   | 73.0 | 78.1             | 73.8 |
| Turkey                           | 82.1     | 75.7 | 78.7     | 72.2 | 78.9   | 72.6 | 77.0             | 72.3 |
| Turkmenistan                     | 73.6     | 66.2 | 71.1     | 64.2 | 70.5   | 62.2 | 72.9             | 66.8 |
| Uganda                           | 64.1     | 59.2 | 61.6     | 57.3 | 64.3   | 60.3 | 56.4             | 53.5 |
| Ukraine                          | 76.9     | 66.9 | 76.5     | 66.6 | 76.1   | 66.3 | 76.6             | 66.8 |
| United Arab Emirates             | 78.5     | 74.4 | 78.6     | 76.4 | 78.6   | 76.4 | 80.0             | 74.7 |
| United Kingdom                   | 82.8     | 78.9 | 83.2     | 79.5 | 83.0   | 79.4 | 82.8             | 78.4 |
| United States                    | 81.2     | 76.5 | 81.6     | 76.9 | 81.6   | 76.9 | 82.0             | 77.3 |
| Uruguay                          | 81.0     | 73.3 | 80.8     | 73.7 | 80.4   | 73.3 | 80.3             | 73.9 |
| Uzbekistan                       | 73.2     | 66.9 | 73.9     | 68.4 | 72.7   | 66.1 | 76.8             | 70.5 |

**Appendix Table 9. Life expectancy at birth in 2015, from World Population Prospects 2017, WHO, US Census Bureau, and GBD 2016**

| Country              | GBD 2016 |      | WPP 2017 |      | WHO    |      | US Census Bureau |      |
|----------------------|----------|------|----------|------|--------|------|------------------|------|
|                      | Female   | Male | Female   | Male | Female | Male | Female           | Male |
| Vanuatu              | 65.3     | 61.9 | 74.2     | 69.8 | 74.0   | 70.1 | 74.7             | 71.5 |
| Venezuela            | 79.8     | 71.3 | 78.6     | 70.4 | 78.5   | 70.0 | 78.7             | 72.5 |
| Vietnam              | 77.9     | 70.6 | 80.7     | 71.3 | 80.7   | 71.3 | 75.9             | 70.7 |
| Virgin Islands, U.S. | 78.6     | 70.4 | 81.9     | 77.2 |        |      |                  |      |
| Yemen                | 68.2     | 66.2 | 66.2     | 63.3 | 67.2   | 64.3 | 67.4             | 63.1 |
| Zambia               | 61.2     | 55.0 | 63.5     | 58.5 | 64.7   | 59.0 | 53.8             | 50.5 |
| Zimbabwe             | 60.9     | 55.7 | 61.4     | 58.0 | 62.3   | 59.0 | 57.6             | 56.5 |

**Appendix Table 10. Under-5 mortality reference sources by source date and location, 1950-2016**

| Location                                         | Source    | Source years                                         | Method     |
|--------------------------------------------------|-----------|------------------------------------------------------|------------|
| China (without Hong Kong and Macao)              | 1992-2013 | Maternal and Child Health Surveillance System (MCHS) | HH         |
| Hong Kong Special Administrative Region of China | 1950-2013 | Vital Registration                                   | VR/SRS/DSP |
| Macao Special Administrative Region of China     | 1954-2010 | Vital Registration                                   | VR/SRS/DSP |
| Anhui                                            | 2000-2014 | Maternal and Child Health Surveillance System (MCHS) | HH         |
| Beijing                                          | 2000-2014 | Maternal and Child Health Surveillance System (MCHS) | HH         |
| Chongqing                                        | 2000-2014 | Maternal and Child Health Surveillance System (MCHS) | HH         |
| Fujian                                           | 1996-2012 | Maternal and Child Mortality Data                    | HH         |
| Gansu                                            | 1996-2002 | Disease Surveillance Points (DSP)                    | VR/SRS/DSP |
| Guangdong                                        | 2000-2014 | Maternal and Child Health Surveillance System (MCHS) | HH         |
| Guangxi                                          | 2000-2014 | Maternal and Child Health Surveillance System (MCHS) | HH         |
| Guizhou                                          | 2000-2014 | Maternal and Child Health Surveillance System (MCHS) | HH         |
| Hainan                                           | 2000-2014 | Maternal and Child Health Surveillance System (MCHS) | HH         |
| Hebei                                            | 2000-2014 | Maternal and Child Health Surveillance System (MCHS) | HH         |
| Heilongjiang                                     | 2002-2014 | Maternal and Child Health Surveillance System (MCHS) | HH         |
| Henan                                            | 1991-2014 | Maternal and Child Health Surveillance System (MCHS) | HH         |
| Hubei                                            | 2000-2014 | Maternal and Child Health Surveillance System (MCHS) | HH         |
| Hunan                                            | 1996-2012 | Maternal and Child Mortality Data                    | HH         |
| Inner Mongolia                                   | 1996-2012 | Maternal and Child Mortality Data                    | HH         |
| Jiangsu                                          | 2000-2014 | Maternal and Child Health Surveillance System (MCHS) | HH         |
| Jiangxi                                          | 2000-2014 | Maternal and Child Health Surveillance System (MCHS) | HH         |
| Jilin                                            | 2000-2014 | Maternal and Child Health Surveillance System (MCHS) | HH         |
| Liaoning                                         | 1996-2012 | Maternal and Child Mortality Data                    | HH         |
| Ningxia                                          | 2000-2014 | Maternal and Child Health Surveillance System (MCHS) | HH         |
| Qinghai                                          | 2000-2014 | Maternal and Child Health Surveillance System (MCHS) | HH         |
| Shaanxi                                          | 2000-2014 | Maternal and Child Health Surveillance System (MCHS) | HH         |
| Shandong                                         | 2000-2014 | Maternal and Child Health Surveillance System (MCHS) | HH         |
| Shanghai                                         | 2000-2014 | Maternal and Child Health Surveillance System (MCHS) | HH         |
| Shanxi                                           | 2000-2014 | Maternal and Child Health Surveillance System (MCHS) | HH         |
| Sichuan                                          | 2002-2014 | Maternal and Child Health Surveillance System (MCHS) | HH         |
| Tianjin                                          | 2000-2014 | Maternal and Child Health Surveillance System (MCHS) | HH         |
| Tibet                                            | 2000      | Census                                               | SBH        |
| Tibet                                            | 1996-2012 | Maternal and Child Mortality Data                    | HH         |
| Xinjiang                                         | 1990      | Census                                               | SBH        |
| Xinjiang                                         | 2004-2014 | Maternal and Child Health Surveillance System (MCHS) | HH         |
| Yunnan                                           | 1996-2012 | Maternal and Child Mortality Data                    | HH         |
| Zhejiang                                         | 2000-2014 | Maternal and Child Health Surveillance System (MCHS) | HH         |
| Zhejiang                                         | 1996-2012 | Maternal and Child Mortality Data                    | HH         |
| Taiwan (Province of China)                       | 1955-2014 | Vital Registration                                   | VR/SRS/DSP |
| Cambodia                                         | 2000      | Demographic and Health Survey (DHS)                  | CBH        |
| Cambodia                                         | 2005      | Demographic and Health Survey (DHS)                  | CBH        |
| Cambodia                                         | 2010      | Demographic and Health Survey (DHS)                  | CBH        |
| Cambodia                                         | 2014      | Demographic and Health Survey (DHS)                  | CBH        |
| Indonesia                                        | 1987      | Demographic and Health Survey (DHS)                  | CBH        |
| Indonesia                                        | 1991      | Demographic and Health Survey (DHS)                  | CBH        |
| Indonesia                                        | 1994      | Demographic and Health Survey (DHS)                  | CBH        |
| Indonesia                                        | 1997      | Demographic and Health Survey (DHS)                  | CBH        |
| Indonesia                                        | 2002      | Demographic and Health Survey (DHS)                  | CBH        |
| Indonesia                                        | 2007      | Demographic and Health Survey (DHS)                  | CBH        |
| Indonesia                                        | 2012      | Demographic and Health Survey (DHS)                  | CBH        |
| Aceh                                             | 1975      | Census                                               | CBH        |
| Aceh                                             | 1977      | Census                                               | CBH        |
| Aceh                                             | 1979      | Census                                               | CBH        |
| Aceh                                             | 1980      | Census                                               | SBH        |
| Aceh                                             | 1981      | Census                                               | CBH        |
| Aceh                                             | 1983      | Census                                               | CBH        |
| Aceh                                             | 1985      | Census                                               | CBH        |
| Aceh                                             | 1987      | Census                                               | CBH        |
| Aceh                                             | 1989      | Census                                               | CBH        |
| Aceh                                             | 1990      | Census                                               | SBH        |
| Aceh                                             | 1991      | Census                                               | CBH        |
| Aceh                                             | 1993      | Census                                               | CBH        |
| Aceh                                             | 1995      | Census                                               | CBH        |
| Aceh                                             | 1997      | Census                                               | CBH        |
| Aceh                                             | 1999      | Census                                               | CBH        |
| Aceh                                             | 2000      | Census                                               | SBH        |
| Aceh                                             | 2010      | Census                                               | SBH        |
| Aceh                                             | 1987      | Demographic and Health Survey (DHS)                  | CBH        |

**Appendix Table 10. Under-5 mortality reference sources by source date and location, 1950-2016**

| Location | Source | Source years                        | Method |
|----------|--------|-------------------------------------|--------|
| Aceh     | 1987   | Demographic and Health Survey (DHS) | SBH    |
| Aceh     | 1989   | Demographic and Health Survey (DHS) | CBH    |
| Aceh     | 1991   | Demographic and Health Survey (DHS) | CBH    |
| Aceh     | 1991   | Demographic and Health Survey (DHS) | SBH    |
| Aceh     | 1993   | Demographic and Health Survey (DHS) | CBH    |
| Aceh     | 1994   | Demographic and Health Survey (DHS) | SBH    |
| Aceh     | 1995   | Demographic and Health Survey (DHS) | CBH    |
| Aceh     | 1997   | Demographic and Health Survey (DHS) | SBH    |
| Aceh     | 1997   | Demographic and Health Survey (DHS) | CBH    |
| Aceh     | 1999   | Demographic and Health Survey (DHS) | CBH    |
| Aceh     | 2001   | Demographic and Health Survey (DHS) | CBH    |
| Aceh     | 2003   | Demographic and Health Survey (DHS) | CBH    |
| Aceh     | 2005   | Demographic and Health Survey (DHS) | CBH    |
| Aceh     | 2007   | Demographic and Health Survey (DHS) | SBH    |
| Aceh     | 2007   | Demographic and Health Survey (DHS) | CBH    |
| Aceh     | 2009   | Demographic and Health Survey (DHS) | CBH    |
| Aceh     | 2011   | Demographic and Health Survey (DHS) | CBH    |
| Aceh     | 2012   | Demographic and Health Survey (DHS) | SBH    |
| Aceh     | 1985   | Health Survey                       | SBH    |
| Aceh     | 1992   | Health Survey                       | SBH    |
| Aceh     | 1993   | Health Survey                       | SBH    |
| Aceh     | 1994   | Health Survey                       | SBH    |
| Aceh     | 1995   | Health Survey                       | SBH    |
| Aceh     | 1996   | Health Survey                       | SBH    |
| Aceh     | 1998   | Health Survey                       | SBH    |
| Aceh     | 1999   | Health Survey                       | SBH    |
| Aceh     | 2002   | Health Survey                       | SBH    |
| Aceh     | 2003   | Health Survey                       | SBH    |
| Aceh     | 2004   | Health Survey                       | SBH    |
| Aceh     | 2006   | Health Survey                       | SBH    |
| Aceh     | 2007   | Health Survey                       | SBH    |
| Aceh     | 2008   | Health Survey                       | SBH    |
| Aceh     | 2009   | Health Survey                       | SBH    |
| Aceh     | 2010   | Health Survey                       | SBH    |
| Aceh     | 2011   | Health Survey                       | SBH    |
| Aceh     | 2012   | Health Survey                       | SBH    |
| Aceh     | 2013   | Health Survey                       | SBH    |
| Bali     | 1957   | Census                              | CBH    |
| Bali     | 1958   | Census                              | CBH    |
| Bali     | 1959   | Census                              | CBH    |
| Bali     | 1960   | Census                              | CBH    |
| Bali     | 1961   | Census                              | CBH    |
| Bali     | 1962   | Census                              | CBH    |
| Bali     | 1963   | Census                              | CBH    |
| Bali     | 1964   | Census                              | CBH    |
| Bali     | 1965   | Census                              | CBH    |
| Bali     | 1966   | Census                              | CBH    |
| Bali     | 1967   | Census                              | CBH    |
| Bali     | 1968   | Census                              | CBH    |
| Bali     | 1969   | Census                              | CBH    |
| Bali     | 1970   | Census                              | CBH    |
| Bali     | 1971   | Census                              | CBH    |
| Bali     | 1972   | Census                              | CBH    |
| Bali     | 1973   | Census                              | CBH    |
| Bali     | 1974   | Census                              | CBH    |
| Bali     | 1975   | Census                              | CBH    |
| Bali     | 1976   | Census                              | CBH    |
| Bali     | 1977   | Census                              | CBH    |
| Bali     | 1978   | Census                              | CBH    |
| Bali     | 1979   | Census                              | CBH    |
| Bali     | 1980   | Census                              | SBH    |
| Bali     | 1980   | Census                              | CBH    |
| Bali     | 1981   | Census                              | CBH    |
| Bali     | 1982   | Census                              | CBH    |
| Bali     | 1983   | Census                              | CBH    |
| Bali     | 1984   | Census                              | CBH    |
| Bali     | 1985   | Census                              | CBH    |



**Appendix Table 10. Under-5 mortality reference sources by source date and location, 1950-2016**

| Location | Source | Source years                        | Method |
|----------|--------|-------------------------------------|--------|
| Bali     | 1986   | Census                              | CBH    |
| Bali     | 1987   | Census                              | CBH    |
| Bali     | 1988   | Census                              | CBH    |
| Bali     | 1989   | Census                              | CBH    |
| Bali     | 1990   | Census                              | CBH    |
| Bali     | 1990   | Census                              | SBH    |
| Bali     | 1991   | Census                              | CBH    |
| Bali     | 1992   | Census                              | CBH    |
| Bali     | 1993   | Census                              | CBH    |
| Bali     | 1994   | Census                              | CBH    |
| Bali     | 1995   | Census                              | CBH    |
| Bali     | 1996   | Census                              | CBH    |
| Bali     | 1997   | Census                              | CBH    |
| Bali     | 1998   | Census                              | CBH    |
| Bali     | 1999   | Census                              | CBH    |
| Bali     | 2000   | Census                              | SBH    |
| Bali     | 2000   | Census                              | CBH    |
| Bali     | 2002   | Census                              | CBH    |
| Bali     | 2004   | Census                              | CBH    |
| Bali     | 2010   | Census                              | SBH    |
| Bali     | 1967   | Demographic and Health Survey (DHS) | CBH    |
| Bali     | 1969   | Demographic and Health Survey (DHS) | CBH    |
| Bali     | 1971   | Demographic and Health Survey (DHS) | CBH    |
| Bali     | 1973   | Demographic and Health Survey (DHS) | CBH    |
| Bali     | 1975   | Demographic and Health Survey (DHS) | CBH    |
| Bali     | 1977   | Demographic and Health Survey (DHS) | CBH    |
| Bali     | 1979   | Demographic and Health Survey (DHS) | CBH    |
| Bali     | 1981   | Demographic and Health Survey (DHS) | CBH    |
| Bali     | 1983   | Demographic and Health Survey (DHS) | CBH    |
| Bali     | 1985   | Demographic and Health Survey (DHS) | CBH    |
| Bali     | 1987   | Demographic and Health Survey (DHS) | CBH    |
| Bali     | 1987   | Demographic and Health Survey (DHS) | SBH    |
| Bali     | 1989   | Demographic and Health Survey (DHS) | CBH    |
| Bali     | 1991   | Demographic and Health Survey (DHS) | SBH    |
| Bali     | 1991   | Demographic and Health Survey (DHS) | CBH    |
| Bali     | 1993   | Demographic and Health Survey (DHS) | CBH    |
| Bali     | 1994   | Demographic and Health Survey (DHS) | SBH    |
| Bali     | 1995   | Demographic and Health Survey (DHS) | CBH    |
| Bali     | 1997   | Demographic and Health Survey (DHS) | SBH    |
| Bali     | 1997   | Demographic and Health Survey (DHS) | CBH    |
| Bali     | 1999   | Demographic and Health Survey (DHS) | CBH    |
| Bali     | 2001   | Demographic and Health Survey (DHS) | CBH    |
| Bali     | 2003   | Demographic and Health Survey (DHS) | SBH    |
| Bali     | 2003   | Demographic and Health Survey (DHS) | CBH    |
| Bali     | 2005   | Demographic and Health Survey (DHS) | CBH    |
| Bali     | 2007   | Demographic and Health Survey (DHS) | SBH    |
| Bali     | 2007   | Demographic and Health Survey (DHS) | CBH    |
| Bali     | 2009   | Demographic and Health Survey (DHS) | CBH    |
| Bali     | 2011   | Demographic and Health Survey (DHS) | CBH    |
| Bali     | 2012   | Demographic and Health Survey (DHS) | SBH    |
| Bali     | 1982   | Health Survey                       | CBH    |
| Bali     | 1984   | Health Survey                       | CBH    |
| Bali     | 1985   | Health Survey                       | SBH    |
| Bali     | 1986   | Health Survey                       | CBH    |
| Bali     | 1988   | Health Survey                       | CBH    |
| Bali     | 1990   | Health Survey                       | CBH    |
| Bali     | 1992   | Health Survey                       | SBH    |
| Bali     | 1992   | Health Survey                       | CBH    |
| Bali     | 1993   | Health Survey                       | SBH    |
| Bali     | 1994   | Health Survey                       | SBH    |
| Bali     | 1994   | Health Survey                       | CBH    |
| Bali     | 1995   | Health Survey                       | SBH    |
| Bali     | 1996   | Health Survey                       | CBH    |
| Bali     | 1996   | Health Survey                       | SBH    |
| Bali     | 1997   | Health Survey                       | SBH    |
| Bali     | 1998   | Health Survey                       | CBH    |
| Bali     | 1998   | Health Survey                       | SBH    |

**Appendix Table 10. Under-5 mortality reference sources by source date and location, 1950-2016**

| Location        | Source | Source years                        | Method |
|-----------------|--------|-------------------------------------|--------|
| Bali            | 1999   | Health Survey                       | SBH    |
| Bali            | 2000   | Health Survey                       | CBH    |
| Bali            | 2000   | Health Survey                       | SBH    |
| Bali            | 2001   | Health Survey                       | SBH    |
| Bali            | 2002   | Health Survey                       | SBH    |
| Bali            | 2003   | Health Survey                       | SBH    |
| Bali            | 2004   | Health Survey                       | SBH    |
| Bali            | 2005   | Health Survey                       | SBH    |
| Bali            | 2006   | Health Survey                       | SBH    |
| Bali            | 2007   | Health Survey                       | SBH    |
| Bali            | 2008   | Health Survey                       | SBH    |
| Bali            | 2009   | Health Survey                       | SBH    |
| Bali            | 2010   | Health Survey                       | SBH    |
| Bali            | 2011   | Health Survey                       | SBH    |
| Bali            | 2012   | Health Survey                       | SBH    |
| Bali            | 2013   | Health Survey                       | SBH    |
| Bangka Belitung | 1964   | Census                              | CBH    |
| Bangka Belitung | 1966   | Census                              | CBH    |
| Bangka Belitung | 1967   | Census                              | CBH    |
| Bangka Belitung | 1968   | Census                              | CBH    |
| Bangka Belitung | 1969   | Census                              | CBH    |
| Bangka Belitung | 1970   | Census                              | CBH    |
| Bangka Belitung | 1971   | Census                              | CBH    |
| Bangka Belitung | 1972   | Census                              | CBH    |
| Bangka Belitung | 1973   | Census                              | CBH    |
| Bangka Belitung | 1974   | Census                              | CBH    |
| Bangka Belitung | 1975   | Census                              | CBH    |
| Bangka Belitung | 1976   | Census                              | CBH    |
| Bangka Belitung | 1977   | Census                              | CBH    |
| Bangka Belitung | 1978   | Census                              | CBH    |
| Bangka Belitung | 1979   | Census                              | CBH    |
| Bangka Belitung | 1980   | Census                              | CBH    |
| Bangka Belitung | 1980   | Census                              | SBH    |
| Bangka Belitung | 1981   | Census                              | CBH    |
| Bangka Belitung | 1982   | Census                              | CBH    |
| Bangka Belitung | 1983   | Census                              | CBH    |
| Bangka Belitung | 1984   | Census                              | CBH    |
| Bangka Belitung | 1985   | Census                              | CBH    |
| Bangka Belitung | 1986   | Census                              | CBH    |
| Bangka Belitung | 1987   | Census                              | CBH    |
| Bangka Belitung | 1988   | Census                              | CBH    |
| Bangka Belitung | 1989   | Census                              | CBH    |
| Bangka Belitung | 1990   | Census                              | CBH    |
| Bangka Belitung | 1990   | Census                              | SBH    |
| Bangka Belitung | 1991   | Census                              | CBH    |
| Bangka Belitung | 1992   | Census                              | CBH    |
| Bangka Belitung | 1993   | Census                              | CBH    |
| Bangka Belitung | 1994   | Census                              | CBH    |
| Bangka Belitung | 1995   | Census                              | CBH    |
| Bangka Belitung | 1996   | Census                              | CBH    |
| Bangka Belitung | 1997   | Census                              | CBH    |
| Bangka Belitung | 1998   | Census                              | CBH    |
| Bangka Belitung | 1999   | Census                              | CBH    |
| Bangka Belitung | 2000   | Census                              | CBH    |
| Bangka Belitung | 2000   | Census                              | SBH    |
| Bangka Belitung | 2002   | Census                              | CBH    |
| Bangka Belitung | 2004   | Census                              | CBH    |
| Bangka Belitung | 2010   | Census                              | SBH    |
| Bangka Belitung | 1979   | Demographic and Health Survey (DHS) | CBH    |
| Bangka Belitung | 1981   | Demographic and Health Survey (DHS) | CBH    |
| Bangka Belitung | 1983   | Demographic and Health Survey (DHS) | CBH    |
| Bangka Belitung | 1985   | Demographic and Health Survey (DHS) | CBH    |
| Bangka Belitung | 1987   | Demographic and Health Survey (DHS) | CBH    |
| Bangka Belitung | 1989   | Demographic and Health Survey (DHS) | CBH    |
| Bangka Belitung | 1991   | Demographic and Health Survey (DHS) | CBH    |
| Bangka Belitung | 1993   | Demographic and Health Survey (DHS) | CBH    |
| Bangka Belitung | 1995   | Demographic and Health Survey (DHS) | CBH    |

**Appendix Table 10. Under-5 mortality reference sources by source date and location, 1950-2016**

| Location        | Source | Source years                        | Method |
|-----------------|--------|-------------------------------------|--------|
| Bangka Belitung | 1997   | Demographic and Health Survey (DHS) | CBH    |
| Bangka Belitung | 1999   | Demographic and Health Survey (DHS) | CBH    |
| Bangka Belitung | 2001   | Demographic and Health Survey (DHS) | CBH    |
| Bangka Belitung | 2003   | Demographic and Health Survey (DHS) | SBH    |
| Bangka Belitung | 2003   | Demographic and Health Survey (DHS) | CBH    |
| Bangka Belitung | 2005   | Demographic and Health Survey (DHS) | CBH    |
| Bangka Belitung | 2007   | Demographic and Health Survey (DHS) | SBH    |
| Bangka Belitung | 2007   | Demographic and Health Survey (DHS) | CBH    |
| Bangka Belitung | 2009   | Demographic and Health Survey (DHS) | CBH    |
| Bangka Belitung | 2011   | Demographic and Health Survey (DHS) | CBH    |
| Bangka Belitung | 2012   | Demographic and Health Survey (DHS) | SBH    |
| Bangka Belitung | 1984   | Health Survey                       | CBH    |
| Bangka Belitung | 1985   | Health Survey                       | SBH    |
| Bangka Belitung | 1986   | Health Survey                       | CBH    |
| Bangka Belitung | 1988   | Health Survey                       | CBH    |
| Bangka Belitung | 1990   | Health Survey                       | CBH    |
| Bangka Belitung | 1992   | Health Survey                       | CBH    |
| Bangka Belitung | 1994   | Health Survey                       | CBH    |
| Bangka Belitung | 1995   | Health Survey                       | SBH    |
| Bangka Belitung | 1996   | Health Survey                       | CBH    |
| Bangka Belitung | 1998   | Health Survey                       | CBH    |
| Bangka Belitung | 2000   | Health Survey                       | CBH    |
| Bangka Belitung | 2000   | Health Survey                       | SBH    |
| Bangka Belitung | 2001   | Health Survey                       | SBH    |
| Bangka Belitung | 2002   | Health Survey                       | SBH    |
| Bangka Belitung | 2003   | Health Survey                       | SBH    |
| Bangka Belitung | 2004   | Health Survey                       | SBH    |
| Bangka Belitung | 2005   | Health Survey                       | SBH    |
| Bangka Belitung | 2006   | Health Survey                       | SBH    |
| Bangka Belitung | 2007   | Health Survey                       | SBH    |
| Bangka Belitung | 2008   | Health Survey                       | SBH    |
| Bangka Belitung | 2009   | Health Survey                       | SBH    |
| Bangka Belitung | 2010   | Health Survey                       | SBH    |
| Bangka Belitung | 2011   | Health Survey                       | SBH    |
| Bangka Belitung | 2012   | Health Survey                       | SBH    |
| Bangka Belitung | 2013   | Health Survey                       | SBH    |
| Banten          | 1964   | Census                              | CBH    |
| Banten          | 1965   | Census                              | CBH    |
| Banten          | 1966   | Census                              | CBH    |
| Banten          | 1967   | Census                              | CBH    |
| Banten          | 1968   | Census                              | CBH    |
| Banten          | 1969   | Census                              | CBH    |
| Banten          | 1970   | Census                              | CBH    |
| Banten          | 1971   | Census                              | CBH    |
| Banten          | 1972   | Census                              | CBH    |
| Banten          | 1973   | Census                              | CBH    |
| Banten          | 1974   | Census                              | CBH    |
| Banten          | 1975   | Census                              | CBH    |
| Banten          | 1976   | Census                              | CBH    |
| Banten          | 1977   | Census                              | CBH    |
| Banten          | 1978   | Census                              | CBH    |
| Banten          | 1979   | Census                              | CBH    |
| Banten          | 1980   | Census                              | SBH    |
| Banten          | 1980   | Census                              | CBH    |
| Banten          | 1981   | Census                              | CBH    |
| Banten          | 1982   | Census                              | CBH    |
| Banten          | 1983   | Census                              | CBH    |
| Banten          | 1984   | Census                              | CBH    |
| Banten          | 1985   | Census                              | CBH    |
| Banten          | 1986   | Census                              | CBH    |
| Banten          | 1987   | Census                              | CBH    |
| Banten          | 1988   | Census                              | CBH    |
| Banten          | 1989   | Census                              | CBH    |
| Banten          | 1990   | Census                              | SBH    |
| Banten          | 1990   | Census                              | CBH    |
| Banten          | 1991   | Census                              | CBH    |
| Banten          | 1992   | Census                              | CBH    |

**Appendix Table 10. Under-5 mortality reference sources by source date and location, 1950-2016**

| Location | Source | Source years                        | Method |
|----------|--------|-------------------------------------|--------|
| Banten   | 1993   | Census                              | CBH    |
| Banten   | 1994   | Census                              | CBH    |
| Banten   | 1995   | Census                              | CBH    |
| Banten   | 1996   | Census                              | CBH    |
| Banten   | 1997   | Census                              | CBH    |
| Banten   | 1998   | Census                              | CBH    |
| Banten   | 1999   | Census                              | CBH    |
| Banten   | 2000   | Census                              | CBH    |
| Banten   | 2000   | Census                              | SBH    |
| Banten   | 2002   | Census                              | CBH    |
| Banten   | 2004   | Census                              | CBH    |
| Banten   | 2010   | Census                              | SBH    |
| Banten   | 1973   | Demographic and Health Survey (DHS) | CBH    |
| Banten   | 1975   | Demographic and Health Survey (DHS) | CBH    |
| Banten   | 1977   | Demographic and Health Survey (DHS) | CBH    |
| Banten   | 1979   | Demographic and Health Survey (DHS) | CBH    |
| Banten   | 1981   | Demographic and Health Survey (DHS) | CBH    |
| Banten   | 1983   | Demographic and Health Survey (DHS) | CBH    |
| Banten   | 1985   | Demographic and Health Survey (DHS) | CBH    |
| Banten   | 1987   | Demographic and Health Survey (DHS) | CBH    |
| Banten   | 1989   | Demographic and Health Survey (DHS) | CBH    |
| Banten   | 1991   | Demographic and Health Survey (DHS) | CBH    |
| Banten   | 1993   | Demographic and Health Survey (DHS) | CBH    |
| Banten   | 1995   | Demographic and Health Survey (DHS) | CBH    |
| Banten   | 1997   | Demographic and Health Survey (DHS) | CBH    |
| Banten   | 1999   | Demographic and Health Survey (DHS) | CBH    |
| Banten   | 2001   | Demographic and Health Survey (DHS) | CBH    |
| Banten   | 2003   | Demographic and Health Survey (DHS) | SBH    |
| Banten   | 2003   | Demographic and Health Survey (DHS) | CBH    |
| Banten   | 2005   | Demographic and Health Survey (DHS) | CBH    |
| Banten   | 2007   | Demographic and Health Survey (DHS) | CBH    |
| Banten   | 2007   | Demographic and Health Survey (DHS) | SBH    |
| Banten   | 2009   | Demographic and Health Survey (DHS) | CBH    |
| Banten   | 2011   | Demographic and Health Survey (DHS) | CBH    |
| Banten   | 2012   | Demographic and Health Survey (DHS) | SBH    |
| Banten   | 1980   | Health Survey                       | CBH    |
| Banten   | 1982   | Health Survey                       | CBH    |
| Banten   | 1984   | Health Survey                       | CBH    |
| Banten   | 1985   | Health Survey                       | SBH    |
| Banten   | 1986   | Health Survey                       | CBH    |
| Banten   | 1988   | Health Survey                       | CBH    |
| Banten   | 1990   | Health Survey                       | CBH    |
| Banten   | 1992   | Health Survey                       | CBH    |
| Banten   | 1992   | Health Survey                       | SBH    |
| Banten   | 1993   | Health Survey                       | SBH    |
| Banten   | 1994   | Health Survey                       | SBH    |
| Banten   | 1994   | Health Survey                       | CBH    |
| Banten   | 1995   | Health Survey                       | SBH    |
| Banten   | 1996   | Health Survey                       | CBH    |
| Banten   | 1996   | Health Survey                       | SBH    |
| Banten   | 1998   | Health Survey                       | CBH    |
| Banten   | 1998   | Health Survey                       | SBH    |
| Banten   | 1999   | Health Survey                       | SBH    |
| Banten   | 2000   | Health Survey                       | SBH    |
| Banten   | 2000   | Health Survey                       | CBH    |
| Banten   | 2001   | Health Survey                       | SBH    |
| Banten   | 2002   | Health Survey                       | SBH    |
| Banten   | 2003   | Health Survey                       | SBH    |
| Banten   | 2004   | Health Survey                       | SBH    |
| Banten   | 2005   | Health Survey                       | SBH    |
| Banten   | 2006   | Health Survey                       | SBH    |
| Banten   | 2007   | Health Survey                       | SBH    |
| Banten   | 2008   | Health Survey                       | SBH    |
| Banten   | 2009   | Health Survey                       | SBH    |
| Banten   | 2010   | Health Survey                       | SBH    |
| Banten   | 2011   | Health Survey                       | SBH    |
| Banten   | 2012   | Health Survey                       | SBH    |

**Appendix Table 10. Under-5 mortality reference sources by source date and location, 1950-2016**

| Location | Source | Source years                        | Method |
|----------|--------|-------------------------------------|--------|
| Banten   | 2013   | Health Survey                       | SBH    |
| Bengkulu | 1962   | Census                              | CBH    |
| Bengkulu | 1964   | Census                              | CBH    |
| Bengkulu | 1966   | Census                              | CBH    |
| Bengkulu | 1967   | Census                              | CBH    |
| Bengkulu | 1968   | Census                              | CBH    |
| Bengkulu | 1969   | Census                              | CBH    |
| Bengkulu | 1970   | Census                              | CBH    |
| Bengkulu | 1971   | Census                              | CBH    |
| Bengkulu | 1972   | Census                              | CBH    |
| Bengkulu | 1973   | Census                              | CBH    |
| Bengkulu | 1974   | Census                              | CBH    |
| Bengkulu | 1975   | Census                              | CBH    |
| Bengkulu | 1976   | Census                              | CBH    |
| Bengkulu | 1977   | Census                              | CBH    |
| Bengkulu | 1978   | Census                              | CBH    |
| Bengkulu | 1979   | Census                              | CBH    |
| Bengkulu | 1980   | Census                              | CBH    |
| Bengkulu | 1980   | Census                              | SBH    |
| Bengkulu | 1981   | Census                              | CBH    |
| Bengkulu | 1982   | Census                              | CBH    |
| Bengkulu | 1983   | Census                              | CBH    |
| Bengkulu | 1984   | Census                              | CBH    |
| Bengkulu | 1985   | Census                              | CBH    |
| Bengkulu | 1986   | Census                              | CBH    |
| Bengkulu | 1987   | Census                              | CBH    |
| Bengkulu | 1988   | Census                              | CBH    |
| Bengkulu | 1989   | Census                              | CBH    |
| Bengkulu | 1990   | Census                              | SBH    |
| Bengkulu | 1990   | Census                              | CBH    |
| Bengkulu | 1991   | Census                              | CBH    |
| Bengkulu | 1992   | Census                              | CBH    |
| Bengkulu | 1993   | Census                              | CBH    |
| Bengkulu | 1994   | Census                              | CBH    |
| Bengkulu | 1995   | Census                              | CBH    |
| Bengkulu | 1996   | Census                              | CBH    |
| Bengkulu | 1997   | Census                              | CBH    |
| Bengkulu | 1998   | Census                              | CBH    |
| Bengkulu | 1999   | Census                              | CBH    |
| Bengkulu | 2000   | Census                              | CBH    |
| Bengkulu | 2000   | Census                              | SBH    |
| Bengkulu | 2002   | Census                              | CBH    |
| Bengkulu | 2004   | Census                              | CBH    |
| Bengkulu | 2010   | Census                              | SBH    |
| Bengkulu | 1971   | Demographic and Health Survey (DHS) | CBH    |
| Bengkulu | 1973   | Demographic and Health Survey (DHS) | CBH    |
| Bengkulu | 1975   | Demographic and Health Survey (DHS) | CBH    |
| Bengkulu | 1977   | Demographic and Health Survey (DHS) | CBH    |
| Bengkulu | 1979   | Demographic and Health Survey (DHS) | CBH    |
| Bengkulu | 1981   | Demographic and Health Survey (DHS) | CBH    |
| Bengkulu | 1983   | Demographic and Health Survey (DHS) | CBH    |
| Bengkulu | 1985   | Demographic and Health Survey (DHS) | CBH    |
| Bengkulu | 1987   | Demographic and Health Survey (DHS) | SBH    |
| Bengkulu | 1987   | Demographic and Health Survey (DHS) | CBH    |
| Bengkulu | 1989   | Demographic and Health Survey (DHS) | CBH    |
| Bengkulu | 1991   | Demographic and Health Survey (DHS) | CBH    |
| Bengkulu | 1991   | Demographic and Health Survey (DHS) | SBH    |
| Bengkulu | 1993   | Demographic and Health Survey (DHS) | CBH    |
| Bengkulu | 1994   | Demographic and Health Survey (DHS) | SBH    |
| Bengkulu | 1995   | Demographic and Health Survey (DHS) | CBH    |
| Bengkulu | 1997   | Demographic and Health Survey (DHS) | SBH    |
| Bengkulu | 1997   | Demographic and Health Survey (DHS) | CBH    |
| Bengkulu | 1999   | Demographic and Health Survey (DHS) | CBH    |
| Bengkulu | 2001   | Demographic and Health Survey (DHS) | CBH    |
| Bengkulu | 2003   | Demographic and Health Survey (DHS) | SBH    |
| Bengkulu | 2003   | Demographic and Health Survey (DHS) | CBH    |
| Bengkulu | 2005   | Demographic and Health Survey (DHS) | CBH    |

**Appendix Table 10. Under-5 mortality reference sources by source date and location, 1950-2016**

| Location  | Source | Source years                        | Method |
|-----------|--------|-------------------------------------|--------|
| Bengkulu  | 2007   | Demographic and Health Survey (DHS) | CBH    |
| Bengkulu  | 2007   | Demographic and Health Survey (DHS) | SBH    |
| Bengkulu  | 2009   | Demographic and Health Survey (DHS) | CBH    |
| Bengkulu  | 2011   | Demographic and Health Survey (DHS) | CBH    |
| Bengkulu  | 2012   | Demographic and Health Survey (DHS) | SBH    |
| Bengkulu  | 1985   | Health Survey                       | SBH    |
| Bengkulu  | 1992   | Health Survey                       | SBH    |
| Bengkulu  | 1993   | Health Survey                       | SBH    |
| Bengkulu  | 1994   | Health Survey                       | SBH    |
| Bengkulu  | 1995   | Health Survey                       | SBH    |
| Bengkulu  | 1996   | Health Survey                       | SBH    |
| Bengkulu  | 1998   | Health Survey                       | SBH    |
| Bengkulu  | 1999   | Health Survey                       | SBH    |
| Bengkulu  | 2000   | Health Survey                       | SBH    |
| Bengkulu  | 2001   | Health Survey                       | SBH    |
| Bengkulu  | 2002   | Health Survey                       | SBH    |
| Bengkulu  | 2003   | Health Survey                       | SBH    |
| Bengkulu  | 2004   | Health Survey                       | SBH    |
| Bengkulu  | 2005   | Health Survey                       | SBH    |
| Bengkulu  | 2006   | Health Survey                       | SBH    |
| Bengkulu  | 2007   | Health Survey                       | SBH    |
| Bengkulu  | 2008   | Health Survey                       | SBH    |
| Bengkulu  | 2009   | Health Survey                       | SBH    |
| Bengkulu  | 2010   | Health Survey                       | SBH    |
| Bengkulu  | 2011   | Health Survey                       | SBH    |
| Bengkulu  | 2012   | Health Survey                       | SBH    |
| Bengkulu  | 2013   | Health Survey                       | SBH    |
| Gorontalo | 1966   | Census                              | CBH    |
| Gorontalo | 1967   | Census                              | CBH    |
| Gorontalo | 1968   | Census                              | CBH    |
| Gorontalo | 1969   | Census                              | CBH    |
| Gorontalo | 1970   | Census                              | CBH    |
| Gorontalo | 1971   | Census                              | CBH    |
| Gorontalo | 1972   | Census                              | CBH    |
| Gorontalo | 1973   | Census                              | CBH    |
| Gorontalo | 1974   | Census                              | CBH    |
| Gorontalo | 1975   | Census                              | CBH    |
| Gorontalo | 1976   | Census                              | CBH    |
| Gorontalo | 1977   | Census                              | CBH    |
| Gorontalo | 1978   | Census                              | CBH    |
| Gorontalo | 1979   | Census                              | CBH    |
| Gorontalo | 1980   | Census                              | SBH    |
| Gorontalo | 1980   | Census                              | CBH    |
| Gorontalo | 1981   | Census                              | CBH    |
| Gorontalo | 1982   | Census                              | CBH    |
| Gorontalo | 1983   | Census                              | CBH    |
| Gorontalo | 1984   | Census                              | CBH    |
| Gorontalo | 1985   | Census                              | CBH    |
| Gorontalo | 1986   | Census                              | CBH    |
| Gorontalo | 1987   | Census                              | CBH    |
| Gorontalo | 1988   | Census                              | CBH    |
| Gorontalo | 1989   | Census                              | CBH    |
| Gorontalo | 1990   | Census                              | CBH    |
| Gorontalo | 1990   | Census                              | SBH    |
| Gorontalo | 1991   | Census                              | CBH    |
| Gorontalo | 1992   | Census                              | CBH    |
| Gorontalo | 1993   | Census                              | CBH    |
| Gorontalo | 1994   | Census                              | CBH    |
| Gorontalo | 1995   | Census                              | CBH    |
| Gorontalo | 1996   | Census                              | CBH    |
| Gorontalo | 1997   | Census                              | CBH    |
| Gorontalo | 1998   | Census                              | CBH    |
| Gorontalo | 1999   | Census                              | CBH    |
| Gorontalo | 2000   | Census                              | SBH    |
| Gorontalo | 2000   | Census                              | CBH    |
| Gorontalo | 2002   | Census                              | CBH    |
| Gorontalo | 2004   | Census                              | CBH    |

**Appendix Table 10. Under-5 mortality reference sources by source date and location, 1950-2016**

| Location  | Source | Source years                        | Method |
|-----------|--------|-------------------------------------|--------|
| Gorontalo | 2010   | Census                              | SBH    |
| Gorontalo | 1977   | Demographic and Health Survey (DHS) | CBH    |
| Gorontalo | 1979   | Demographic and Health Survey (DHS) | CBH    |
| Gorontalo | 1981   | Demographic and Health Survey (DHS) | CBH    |
| Gorontalo | 1983   | Demographic and Health Survey (DHS) | CBH    |
| Gorontalo | 1985   | Demographic and Health Survey (DHS) | CBH    |
| Gorontalo | 1987   | Demographic and Health Survey (DHS) | CBH    |
| Gorontalo | 1989   | Demographic and Health Survey (DHS) | CBH    |
| Gorontalo | 1991   | Demographic and Health Survey (DHS) | CBH    |
| Gorontalo | 1993   | Demographic and Health Survey (DHS) | CBH    |
| Gorontalo | 1995   | Demographic and Health Survey (DHS) | CBH    |
| Gorontalo | 1997   | Demographic and Health Survey (DHS) | CBH    |
| Gorontalo | 1999   | Demographic and Health Survey (DHS) | CBH    |
| Gorontalo | 2001   | Demographic and Health Survey (DHS) | CBH    |
| Gorontalo | 2003   | Demographic and Health Survey (DHS) | SBH    |
| Gorontalo | 2003   | Demographic and Health Survey (DHS) | CBH    |
| Gorontalo | 2005   | Demographic and Health Survey (DHS) | CBH    |
| Gorontalo | 2007   | Demographic and Health Survey (DHS) | CBH    |
| Gorontalo | 2007   | Demographic and Health Survey (DHS) | SBH    |
| Gorontalo | 2009   | Demographic and Health Survey (DHS) | CBH    |
| Gorontalo | 2011   | Demographic and Health Survey (DHS) | CBH    |
| Gorontalo | 2012   | Demographic and Health Survey (DHS) | SBH    |
| Gorontalo | 1985   | Health Survey                       | SBH    |
| Gorontalo | 1995   | Health Survey                       | SBH    |
| Gorontalo | 2001   | Health Survey                       | SBH    |
| Gorontalo | 2002   | Health Survey                       | SBH    |
| Gorontalo | 2003   | Health Survey                       | SBH    |
| Gorontalo | 2004   | Health Survey                       | SBH    |
| Gorontalo | 2005   | Health Survey                       | SBH    |
| Gorontalo | 2006   | Health Survey                       | SBH    |
| Gorontalo | 2007   | Health Survey                       | SBH    |
| Gorontalo | 2008   | Health Survey                       | SBH    |
| Gorontalo | 2009   | Health Survey                       | SBH    |
| Gorontalo | 2010   | Health Survey                       | SBH    |
| Gorontalo | 2011   | Health Survey                       | SBH    |
| Gorontalo | 2012   | Health Survey                       | SBH    |
| Gorontalo | 2013   | Health Survey                       | SBH    |
| Jakarta   | 1958   | Census                              | CBH    |
| Jakarta   | 1960   | Census                              | CBH    |
| Jakarta   | 1962   | Census                              | CBH    |
| Jakarta   | 1964   | Census                              | CBH    |
| Jakarta   | 1965   | Census                              | CBH    |
| Jakarta   | 1966   | Census                              | CBH    |
| Jakarta   | 1967   | Census                              | CBH    |
| Jakarta   | 1968   | Census                              | CBH    |
| Jakarta   | 1969   | Census                              | CBH    |
| Jakarta   | 1970   | Census                              | CBH    |
| Jakarta   | 1971   | Census                              | CBH    |
| Jakarta   | 1972   | Census                              | CBH    |
| Jakarta   | 1973   | Census                              | CBH    |
| Jakarta   | 1974   | Census                              | CBH    |
| Jakarta   | 1975   | Census                              | CBH    |
| Jakarta   | 1976   | Census                              | CBH    |
| Jakarta   | 1977   | Census                              | CBH    |
| Jakarta   | 1978   | Census                              | CBH    |
| Jakarta   | 1979   | Census                              | CBH    |
| Jakarta   | 1980   | Census                              | CBH    |
| Jakarta   | 1980   | Census                              | SBH    |
| Jakarta   | 1981   | Census                              | CBH    |
| Jakarta   | 1982   | Census                              | CBH    |
| Jakarta   | 1983   | Census                              | CBH    |
| Jakarta   | 1984   | Census                              | CBH    |
| Jakarta   | 1985   | Census                              | CBH    |
| Jakarta   | 1986   | Census                              | CBH    |
| Jakarta   | 1987   | Census                              | CBH    |
| Jakarta   | 1988   | Census                              | CBH    |
| Jakarta   | 1989   | Census                              | CBH    |

**Appendix Table 10. Under-5 mortality reference sources by source date and location, 1950-2016**

| Location | Source | Source years                        | Method |
|----------|--------|-------------------------------------|--------|
| Jakarta  | 1990   | Census                              | CBH    |
| Jakarta  | 1990   | Census                              | SBH    |
| Jakarta  | 1991   | Census                              | CBH    |
| Jakarta  | 1992   | Census                              | CBH    |
| Jakarta  | 1993   | Census                              | CBH    |
| Jakarta  | 1994   | Census                              | CBH    |
| Jakarta  | 1995   | Census                              | CBH    |
| Jakarta  | 1996   | Census                              | CBH    |
| Jakarta  | 1997   | Census                              | CBH    |
| Jakarta  | 1998   | Census                              | CBH    |
| Jakarta  | 1999   | Census                              | CBH    |
| Jakarta  | 2000   | Census                              | CBH    |
| Jakarta  | 2000   | Census                              | SBH    |
| Jakarta  | 2002   | Census                              | CBH    |
| Jakarta  | 2004   | Census                              | CBH    |
| Jakarta  | 2010   | Census                              | SBH    |
| Jakarta  | 1963   | Demographic and Health Survey (DHS) | CBH    |
| Jakarta  | 1965   | Demographic and Health Survey (DHS) | CBH    |
| Jakarta  | 1967   | Demographic and Health Survey (DHS) | CBH    |
| Jakarta  | 1969   | Demographic and Health Survey (DHS) | CBH    |
| Jakarta  | 1971   | Demographic and Health Survey (DHS) | CBH    |
| Jakarta  | 1973   | Demographic and Health Survey (DHS) | CBH    |
| Jakarta  | 1975   | Demographic and Health Survey (DHS) | CBH    |
| Jakarta  | 1977   | Demographic and Health Survey (DHS) | CBH    |
| Jakarta  | 1979   | Demographic and Health Survey (DHS) | CBH    |
| Jakarta  | 1981   | Demographic and Health Survey (DHS) | CBH    |
| Jakarta  | 1983   | Demographic and Health Survey (DHS) | CBH    |
| Jakarta  | 1985   | Demographic and Health Survey (DHS) | CBH    |
| Jakarta  | 1987   | Demographic and Health Survey (DHS) | SBH    |
| Jakarta  | 1987   | Demographic and Health Survey (DHS) | CBH    |
| Jakarta  | 1989   | Demographic and Health Survey (DHS) | CBH    |
| Jakarta  | 1991   | Demographic and Health Survey (DHS) | CBH    |
| Jakarta  | 1991   | Demographic and Health Survey (DHS) | SBH    |
| Jakarta  | 1993   | Demographic and Health Survey (DHS) | CBH    |
| Jakarta  | 1994   | Demographic and Health Survey (DHS) | SBH    |
| Jakarta  | 1995   | Demographic and Health Survey (DHS) | CBH    |
| Jakarta  | 1997   | Demographic and Health Survey (DHS) | CBH    |
| Jakarta  | 1997   | Demographic and Health Survey (DHS) | SBH    |
| Jakarta  | 1999   | Demographic and Health Survey (DHS) | CBH    |
| Jakarta  | 2001   | Demographic and Health Survey (DHS) | CBH    |
| Jakarta  | 2003   | Demographic and Health Survey (DHS) | SBH    |
| Jakarta  | 2003   | Demographic and Health Survey (DHS) | CBH    |
| Jakarta  | 2005   | Demographic and Health Survey (DHS) | CBH    |
| Jakarta  | 2007   | Demographic and Health Survey (DHS) | CBH    |
| Jakarta  | 2007   | Demographic and Health Survey (DHS) | SBH    |
| Jakarta  | 2009   | Demographic and Health Survey (DHS) | CBH    |
| Jakarta  | 2011   | Demographic and Health Survey (DHS) | CBH    |
| Jakarta  | 2012   | Demographic and Health Survey (DHS) | SBH    |
| Jakarta  | 1980   | Health Survey                       | CBH    |
| Jakarta  | 1982   | Health Survey                       | CBH    |
| Jakarta  | 1984   | Health Survey                       | CBH    |
| Jakarta  | 1985   | Health Survey                       | SBH    |
| Jakarta  | 1986   | Health Survey                       | CBH    |
| Jakarta  | 1988   | Health Survey                       | CBH    |
| Jakarta  | 1990   | Health Survey                       | CBH    |
| Jakarta  | 1992   | Health Survey                       | CBH    |
| Jakarta  | 1992   | Health Survey                       | SBH    |
| Jakarta  | 1993   | Health Survey                       | SBH    |
| Jakarta  | 1994   | Health Survey                       | CBH    |
| Jakarta  | 1994   | Health Survey                       | SBH    |
| Jakarta  | 1995   | Health Survey                       | SBH    |
| Jakarta  | 1996   | Health Survey                       | CBH    |
| Jakarta  | 1996   | Health Survey                       | SBH    |
| Jakarta  | 1997   | Health Survey                       | SBH    |
| Jakarta  | 1998   | Health Survey                       | SBH    |
| Jakarta  | 1998   | Health Survey                       | CBH    |
| Jakarta  | 1999   | Health Survey                       | SBH    |



**Appendix Table 10. Under-5 mortality reference sources by source date and location, 1950-2016**

| Location | Source | Source years                        | Method |
|----------|--------|-------------------------------------|--------|
| Jakarta  | 2000   | Health Survey                       | CBH    |
| Jakarta  | 2000   | Health Survey                       | SBH    |
| Jakarta  | 2001   | Health Survey                       | SBH    |
| Jakarta  | 2002   | Health Survey                       | SBH    |
| Jakarta  | 2003   | Health Survey                       | SBH    |
| Jakarta  | 2004   | Health Survey                       | SBH    |
| Jakarta  | 2005   | Health Survey                       | SBH    |
| Jakarta  | 2006   | Health Survey                       | SBH    |
| Jakarta  | 2007   | Health Survey                       | SBH    |
| Jakarta  | 2008   | Health Survey                       | SBH    |
| Jakarta  | 2009   | Health Survey                       | SBH    |
| Jakarta  | 2010   | Health Survey                       | SBH    |
| Jakarta  | 2011   | Health Survey                       | SBH    |
| Jakarta  | 2012   | Health Survey                       | SBH    |
| Jakarta  | 2013   | Health Survey                       | SBH    |
| Jambi    | 1961   | Census                              | CBH    |
| Jambi    | 1963   | Census                              | CBH    |
| Jambi    | 1964   | Census                              | CBH    |
| Jambi    | 1965   | Census                              | CBH    |
| Jambi    | 1966   | Census                              | CBH    |
| Jambi    | 1967   | Census                              | CBH    |
| Jambi    | 1968   | Census                              | CBH    |
| Jambi    | 1969   | Census                              | CBH    |
| Jambi    | 1970   | Census                              | CBH    |
| Jambi    | 1971   | Census                              | CBH    |
| Jambi    | 1972   | Census                              | CBH    |
| Jambi    | 1973   | Census                              | CBH    |
| Jambi    | 1974   | Census                              | CBH    |
| Jambi    | 1975   | Census                              | CBH    |
| Jambi    | 1976   | Census                              | CBH    |
| Jambi    | 1977   | Census                              | CBH    |
| Jambi    | 1978   | Census                              | CBH    |
| Jambi    | 1979   | Census                              | CBH    |
| Jambi    | 1980   | Census                              | CBH    |
| Jambi    | 1980   | Census                              | SBH    |
| Jambi    | 1981   | Census                              | CBH    |
| Jambi    | 1982   | Census                              | CBH    |
| Jambi    | 1983   | Census                              | CBH    |
| Jambi    | 1984   | Census                              | CBH    |
| Jambi    | 1985   | Census                              | CBH    |
| Jambi    | 1986   | Census                              | CBH    |
| Jambi    | 1987   | Census                              | CBH    |
| Jambi    | 1988   | Census                              | CBH    |
| Jambi    | 1989   | Census                              | CBH    |
| Jambi    | 1990   | Census                              | CBH    |
| Jambi    | 1990   | Census                              | SBH    |
| Jambi    | 1991   | Census                              | CBH    |
| Jambi    | 1992   | Census                              | CBH    |
| Jambi    | 1993   | Census                              | CBH    |
| Jambi    | 1994   | Census                              | CBH    |
| Jambi    | 1995   | Census                              | CBH    |
| Jambi    | 1996   | Census                              | CBH    |
| Jambi    | 1997   | Census                              | CBH    |
| Jambi    | 1998   | Census                              | CBH    |
| Jambi    | 1999   | Census                              | CBH    |
| Jambi    | 2000   | Census                              | CBH    |
| Jambi    | 2000   | Census                              | SBH    |
| Jambi    | 2002   | Census                              | CBH    |
| Jambi    | 2004   | Census                              | CBH    |
| Jambi    | 2010   | Census                              | SBH    |
| Jambi    | 1973   | Demographic and Health Survey (DHS) | CBH    |
| Jambi    | 1975   | Demographic and Health Survey (DHS) | CBH    |
| Jambi    | 1977   | Demographic and Health Survey (DHS) | CBH    |
| Jambi    | 1979   | Demographic and Health Survey (DHS) | CBH    |
| Jambi    | 1981   | Demographic and Health Survey (DHS) | CBH    |
| Jambi    | 1983   | Demographic and Health Survey (DHS) | CBH    |
| Jambi    | 1985   | Demographic and Health Survey (DHS) | CBH    |

**Appendix Table 10. Under-5 mortality reference sources by source date and location, 1950-2016**

| Location   | Source | Source years                        | Method |
|------------|--------|-------------------------------------|--------|
| Jambi      | 1987   | Demographic and Health Survey (DHS) | CBH    |
| Jambi      | 1989   | Demographic and Health Survey (DHS) | CBH    |
| Jambi      | 1991   | Demographic and Health Survey (DHS) | SBH    |
| Jambi      | 1991   | Demographic and Health Survey (DHS) | CBH    |
| Jambi      | 1993   | Demographic and Health Survey (DHS) | CBH    |
| Jambi      | 1994   | Demographic and Health Survey (DHS) | SBH    |
| Jambi      | 1995   | Demographic and Health Survey (DHS) | CBH    |
| Jambi      | 1997   | Demographic and Health Survey (DHS) | CBH    |
| Jambi      | 1997   | Demographic and Health Survey (DHS) | SBH    |
| Jambi      | 1999   | Demographic and Health Survey (DHS) | CBH    |
| Jambi      | 2001   | Demographic and Health Survey (DHS) | CBH    |
| Jambi      | 2003   | Demographic and Health Survey (DHS) | CBH    |
| Jambi      | 2003   | Demographic and Health Survey (DHS) | SBH    |
| Jambi      | 2005   | Demographic and Health Survey (DHS) | CBH    |
| Jambi      | 2007   | Demographic and Health Survey (DHS) | SBH    |
| Jambi      | 2007   | Demographic and Health Survey (DHS) | CBH    |
| Jambi      | 2009   | Demographic and Health Survey (DHS) | CBH    |
| Jambi      | 2011   | Demographic and Health Survey (DHS) | CBH    |
| Jambi      | 2012   | Demographic and Health Survey (DHS) | SBH    |
| Jambi      | 1985   | Health Survey                       | SBH    |
| Jambi      | 1992   | Health Survey                       | SBH    |
| Jambi      | 1993   | Health Survey                       | SBH    |
| Jambi      | 1994   | Health Survey                       | SBH    |
| Jambi      | 1995   | Health Survey                       | SBH    |
| Jambi      | 1996   | Health Survey                       | SBH    |
| Jambi      | 1998   | Health Survey                       | SBH    |
| Jambi      | 1999   | Health Survey                       | SBH    |
| Jambi      | 2000   | Health Survey                       | SBH    |
| Jambi      | 2001   | Health Survey                       | SBH    |
| Jambi      | 2002   | Health Survey                       | SBH    |
| Jambi      | 2003   | Health Survey                       | SBH    |
| Jambi      | 2004   | Health Survey                       | SBH    |
| Jambi      | 2005   | Health Survey                       | SBH    |
| Jambi      | 2006   | Health Survey                       | SBH    |
| Jambi      | 2007   | Health Survey                       | SBH    |
| Jambi      | 2008   | Health Survey                       | SBH    |
| Jambi      | 2009   | Health Survey                       | SBH    |
| Jambi      | 2010   | Health Survey                       | SBH    |
| Jambi      | 2011   | Health Survey                       | SBH    |
| Jambi      | 2012   | Health Survey                       | SBH    |
| Jambi      | 2013   | Health Survey                       | SBH    |
| Jawa Barat | 1949   | Census                              | CBH    |
| Jawa Barat | 1950   | Census                              | CBH    |
| Jawa Barat | 1951   | Census                              | CBH    |
| Jawa Barat | 1952   | Census                              | CBH    |
| Jawa Barat | 1953   | Census                              | CBH    |
| Jawa Barat | 1954   | Census                              | CBH    |
| Jawa Barat | 1955   | Census                              | CBH    |
| Jawa Barat | 1956   | Census                              | CBH    |
| Jawa Barat | 1957   | Census                              | CBH    |
| Jawa Barat | 1958   | Census                              | CBH    |
| Jawa Barat | 1959   | Census                              | CBH    |
| Jawa Barat | 1960   | Census                              | CBH    |
| Jawa Barat | 1961   | Census                              | CBH    |
| Jawa Barat | 1962   | Census                              | CBH    |
| Jawa Barat | 1963   | Census                              | CBH    |
| Jawa Barat | 1964   | Census                              | CBH    |
| Jawa Barat | 1965   | Census                              | CBH    |
| Jawa Barat | 1966   | Census                              | CBH    |
| Jawa Barat | 1967   | Census                              | CBH    |
| Jawa Barat | 1968   | Census                              | CBH    |
| Jawa Barat | 1969   | Census                              | CBH    |
| Jawa Barat | 1970   | Census                              | CBH    |
| Jawa Barat | 1971   | Census                              | CBH    |
| Jawa Barat | 1972   | Census                              | CBH    |
| Jawa Barat | 1973   | Census                              | CBH    |
| Jawa Barat | 1974   | Census                              | CBH    |

**Appendix Table 10. Under-5 mortality reference sources by source date and location, 1950-2016**

| Location   | Source | Source years                        | Method |
|------------|--------|-------------------------------------|--------|
| Jawa Barat | 1975   | Census                              | CBH    |
| Jawa Barat | 1976   | Census                              | CBH    |
| Jawa Barat | 1977   | Census                              | CBH    |
| Jawa Barat | 1978   | Census                              | CBH    |
| Jawa Barat | 1979   | Census                              | CBH    |
| Jawa Barat | 1980   | Census                              | CBH    |
| Jawa Barat | 1980   | Census                              | SBH    |
| Jawa Barat | 1981   | Census                              | CBH    |
| Jawa Barat | 1982   | Census                              | CBH    |
| Jawa Barat | 1983   | Census                              | CBH    |
| Jawa Barat | 1984   | Census                              | CBH    |
| Jawa Barat | 1985   | Census                              | CBH    |
| Jawa Barat | 1986   | Census                              | CBH    |
| Jawa Barat | 1987   | Census                              | CBH    |
| Jawa Barat | 1988   | Census                              | CBH    |
| Jawa Barat | 1989   | Census                              | CBH    |
| Jawa Barat | 1990   | Census                              | CBH    |
| Jawa Barat | 1990   | Census                              | SBH    |
| Jawa Barat | 1991   | Census                              | CBH    |
| Jawa Barat | 1992   | Census                              | CBH    |
| Jawa Barat | 1993   | Census                              | CBH    |
| Jawa Barat | 1994   | Census                              | CBH    |
| Jawa Barat | 1995   | Census                              | CBH    |
| Jawa Barat | 1996   | Census                              | CBH    |
| Jawa Barat | 1997   | Census                              | CBH    |
| Jawa Barat | 1998   | Census                              | CBH    |
| Jawa Barat | 1999   | Census                              | CBH    |
| Jawa Barat | 2000   | Census                              | SBH    |
| Jawa Barat | 2000   | Census                              | CBH    |
| Jawa Barat | 2002   | Census                              | CBH    |
| Jawa Barat | 2004   | Census                              | CBH    |
| Jawa Barat | 2010   | Census                              | SBH    |
| Jawa Barat | 1965   | Demographic and Health Survey (DHS) | CBH    |
| Jawa Barat | 1967   | Demographic and Health Survey (DHS) | CBH    |
| Jawa Barat | 1969   | Demographic and Health Survey (DHS) | CBH    |
| Jawa Barat | 1971   | Demographic and Health Survey (DHS) | CBH    |
| Jawa Barat | 1973   | Demographic and Health Survey (DHS) | CBH    |
| Jawa Barat | 1975   | Demographic and Health Survey (DHS) | CBH    |
| Jawa Barat | 1977   | Demographic and Health Survey (DHS) | CBH    |
| Jawa Barat | 1979   | Demographic and Health Survey (DHS) | CBH    |
| Jawa Barat | 1981   | Demographic and Health Survey (DHS) | CBH    |
| Jawa Barat | 1983   | Demographic and Health Survey (DHS) | CBH    |
| Jawa Barat | 1985   | Demographic and Health Survey (DHS) | CBH    |
| Jawa Barat | 1987   | Demographic and Health Survey (DHS) | CBH    |
| Jawa Barat | 1987   | Demographic and Health Survey (DHS) | SBH    |
| Jawa Barat | 1989   | Demographic and Health Survey (DHS) | CBH    |
| Jawa Barat | 1991   | Demographic and Health Survey (DHS) | SBH    |
| Jawa Barat | 1991   | Demographic and Health Survey (DHS) | CBH    |
| Jawa Barat | 1993   | Demographic and Health Survey (DHS) | CBH    |
| Jawa Barat | 1994   | Demographic and Health Survey (DHS) | SBH    |
| Jawa Barat | 1995   | Demographic and Health Survey (DHS) | CBH    |
| Jawa Barat | 1997   | Demographic and Health Survey (DHS) | CBH    |
| Jawa Barat | 1997   | Demographic and Health Survey (DHS) | SBH    |
| Jawa Barat | 1999   | Demographic and Health Survey (DHS) | CBH    |
| Jawa Barat | 2001   | Demographic and Health Survey (DHS) | CBH    |
| Jawa Barat | 2003   | Demographic and Health Survey (DHS) | SBH    |
| Jawa Barat | 2003   | Demographic and Health Survey (DHS) | CBH    |
| Jawa Barat | 2005   | Demographic and Health Survey (DHS) | CBH    |
| Jawa Barat | 2007   | Demographic and Health Survey (DHS) | SBH    |
| Jawa Barat | 2007   | Demographic and Health Survey (DHS) | CBH    |
| Jawa Barat | 2009   | Demographic and Health Survey (DHS) | CBH    |
| Jawa Barat | 2011   | Demographic and Health Survey (DHS) | CBH    |
| Jawa Barat | 2012   | Demographic and Health Survey (DHS) | SBH    |
| Jawa Barat | 1978   | Health Survey                       | CBH    |
| Jawa Barat | 1980   | Health Survey                       | CBH    |
| Jawa Barat | 1982   | Health Survey                       | CBH    |
| Jawa Barat | 1984   | Health Survey                       | CBH    |

**Appendix Table 10. Under-5 mortality reference sources by source date and location, 1950-2016**

| Location    | Source | Source years  | Method |
|-------------|--------|---------------|--------|
| Jawa Barat  | 1985   | Health Survey | SBH    |
| Jawa Barat  | 1986   | Health Survey | CBH    |
| Jawa Barat  | 1988   | Health Survey | CBH    |
| Jawa Barat  | 1990   | Health Survey | CBH    |
| Jawa Barat  | 1992   | Health Survey | CBH    |
| Jawa Barat  | 1992   | Health Survey | SBH    |
| Jawa Barat  | 1993   | Health Survey | SBH    |
| Jawa Barat  | 1994   | Health Survey | SBH    |
| Jawa Barat  | 1994   | Health Survey | CBH    |
| Jawa Barat  | 1995   | Health Survey | SBH    |
| Jawa Barat  | 1996   | Health Survey | CBH    |
| Jawa Barat  | 1996   | Health Survey | SBH    |
| Jawa Barat  | 1997   | Health Survey | SBH    |
| Jawa Barat  | 1998   | Health Survey | CBH    |
| Jawa Barat  | 1998   | Health Survey | SBH    |
| Jawa Barat  | 1999   | Health Survey | SBH    |
| Jawa Barat  | 2000   | Health Survey | SBH    |
| Jawa Barat  | 2000   | Health Survey | CBH    |
| Jawa Barat  | 2001   | Health Survey | SBH    |
| Jawa Barat  | 2002   | Health Survey | SBH    |
| Jawa Barat  | 2003   | Health Survey | SBH    |
| Jawa Barat  | 2004   | Health Survey | SBH    |
| Jawa Barat  | 2005   | Health Survey | SBH    |
| Jawa Barat  | 2006   | Health Survey | SBH    |
| Jawa Barat  | 2007   | Health Survey | SBH    |
| Jawa Barat  | 2008   | Health Survey | SBH    |
| Jawa Barat  | 2009   | Health Survey | SBH    |
| Jawa Barat  | 2010   | Health Survey | SBH    |
| Jawa Barat  | 2011   | Health Survey | SBH    |
| Jawa Barat  | 2012   | Health Survey | SBH    |
| Jawa Barat  | 2013   | Health Survey | SBH    |
| Jawa Tengah | 1949   | Census        | CBH    |
| Jawa Tengah | 1950   | Census        | CBH    |
| Jawa Tengah | 1951   | Census        | CBH    |
| Jawa Tengah | 1952   | Census        | CBH    |
| Jawa Tengah | 1953   | Census        | CBH    |
| Jawa Tengah | 1954   | Census        | CBH    |
| Jawa Tengah | 1955   | Census        | CBH    |
| Jawa Tengah | 1956   | Census        | CBH    |
| Jawa Tengah | 1957   | Census        | CBH    |
| Jawa Tengah | 1958   | Census        | CBH    |
| Jawa Tengah | 1959   | Census        | CBH    |
| Jawa Tengah | 1960   | Census        | CBH    |
| Jawa Tengah | 1961   | Census        | CBH    |
| Jawa Tengah | 1962   | Census        | CBH    |
| Jawa Tengah | 1963   | Census        | CBH    |
| Jawa Tengah | 1964   | Census        | CBH    |
| Jawa Tengah | 1965   | Census        | CBH    |
| Jawa Tengah | 1966   | Census        | CBH    |
| Jawa Tengah | 1967   | Census        | CBH    |
| Jawa Tengah | 1968   | Census        | CBH    |
| Jawa Tengah | 1969   | Census        | CBH    |
| Jawa Tengah | 1970   | Census        | CBH    |
| Jawa Tengah | 1971   | Census        | CBH    |
| Jawa Tengah | 1972   | Census        | CBH    |
| Jawa Tengah | 1973   | Census        | CBH    |
| Jawa Tengah | 1974   | Census        | CBH    |
| Jawa Tengah | 1975   | Census        | CBH    |
| Jawa Tengah | 1976   | Census        | CBH    |
| Jawa Tengah | 1977   | Census        | CBH    |
| Jawa Tengah | 1978   | Census        | CBH    |
| Jawa Tengah | 1979   | Census        | CBH    |
| Jawa Tengah | 1980   | Census        | SBH    |
| Jawa Tengah | 1980   | Census        | CBH    |
| Jawa Tengah | 1981   | Census        | CBH    |
| Jawa Tengah | 1982   | Census        | CBH    |
| Jawa Tengah | 1983   | Census        | CBH    |

**Appendix Table 10. Under-5 mortality reference sources by source date and location, 1950-2016**

| Location    | Source | Source years                        | Method |
|-------------|--------|-------------------------------------|--------|
| Jawa Tengah | 1984   | Census                              | CBH    |
| Jawa Tengah | 1985   | Census                              | CBH    |
| Jawa Tengah | 1986   | Census                              | CBH    |
| Jawa Tengah | 1987   | Census                              | CBH    |
| Jawa Tengah | 1988   | Census                              | CBH    |
| Jawa Tengah | 1989   | Census                              | CBH    |
| Jawa Tengah | 1990   | Census                              | SBH    |
| Jawa Tengah | 1990   | Census                              | CBH    |
| Jawa Tengah | 1991   | Census                              | CBH    |
| Jawa Tengah | 1992   | Census                              | CBH    |
| Jawa Tengah | 1993   | Census                              | CBH    |
| Jawa Tengah | 1994   | Census                              | CBH    |
| Jawa Tengah | 1995   | Census                              | CBH    |
| Jawa Tengah | 1996   | Census                              | CBH    |
| Jawa Tengah | 1997   | Census                              | CBH    |
| Jawa Tengah | 1998   | Census                              | CBH    |
| Jawa Tengah | 1999   | Census                              | CBH    |
| Jawa Tengah | 2000   | Census                              | SBH    |
| Jawa Tengah | 2000   | Census                              | CBH    |
| Jawa Tengah | 2002   | Census                              | CBH    |
| Jawa Tengah | 2004   | Census                              | CBH    |
| Jawa Tengah | 2010   | Census                              | SBH    |
| Jawa Tengah | 1965   | Demographic and Health Survey (DHS) | CBH    |
| Jawa Tengah | 1967   | Demographic and Health Survey (DHS) | CBH    |
| Jawa Tengah | 1969   | Demographic and Health Survey (DHS) | CBH    |
| Jawa Tengah | 1971   | Demographic and Health Survey (DHS) | CBH    |
| Jawa Tengah | 1973   | Demographic and Health Survey (DHS) | CBH    |
| Jawa Tengah | 1975   | Demographic and Health Survey (DHS) | CBH    |
| Jawa Tengah | 1977   | Demographic and Health Survey (DHS) | CBH    |
| Jawa Tengah | 1979   | Demographic and Health Survey (DHS) | CBH    |
| Jawa Tengah | 1981   | Demographic and Health Survey (DHS) | CBH    |
| Jawa Tengah | 1983   | Demographic and Health Survey (DHS) | CBH    |
| Jawa Tengah | 1985   | Demographic and Health Survey (DHS) | CBH    |
| Jawa Tengah | 1987   | Demographic and Health Survey (DHS) | SBH    |
| Jawa Tengah | 1987   | Demographic and Health Survey (DHS) | CBH    |
| Jawa Tengah | 1989   | Demographic and Health Survey (DHS) | CBH    |
| Jawa Tengah | 1991   | Demographic and Health Survey (DHS) | CBH    |
| Jawa Tengah | 1991   | Demographic and Health Survey (DHS) | SBH    |
| Jawa Tengah | 1993   | Demographic and Health Survey (DHS) | CBH    |
| Jawa Tengah | 1994   | Demographic and Health Survey (DHS) | SBH    |
| Jawa Tengah | 1995   | Demographic and Health Survey (DHS) | CBH    |
| Jawa Tengah | 1997   | Demographic and Health Survey (DHS) | CBH    |
| Jawa Tengah | 1997   | Demographic and Health Survey (DHS) | SBH    |
| Jawa Tengah | 1999   | Demographic and Health Survey (DHS) | CBH    |
| Jawa Tengah | 2001   | Demographic and Health Survey (DHS) | CBH    |
| Jawa Tengah | 2003   | Demographic and Health Survey (DHS) | CBH    |
| Jawa Tengah | 2003   | Demographic and Health Survey (DHS) | SBH    |
| Jawa Tengah | 2005   | Demographic and Health Survey (DHS) | CBH    |
| Jawa Tengah | 2007   | Demographic and Health Survey (DHS) | CBH    |
| Jawa Tengah | 2007   | Demographic and Health Survey (DHS) | SBH    |
| Jawa Tengah | 2009   | Demographic and Health Survey (DHS) | CBH    |
| Jawa Tengah | 2011   | Demographic and Health Survey (DHS) | CBH    |
| Jawa Tengah | 2012   | Demographic and Health Survey (DHS) | SBH    |
| Jawa Tengah | 1980   | Health Survey                       | CBH    |
| Jawa Tengah | 1982   | Health Survey                       | CBH    |
| Jawa Tengah | 1984   | Health Survey                       | CBH    |
| Jawa Tengah | 1985   | Health Survey                       | SBH    |
| Jawa Tengah | 1986   | Health Survey                       | CBH    |
| Jawa Tengah | 1988   | Health Survey                       | CBH    |
| Jawa Tengah | 1990   | Health Survey                       | CBH    |
| Jawa Tengah | 1992   | Health Survey                       | CBH    |
| Jawa Tengah | 1992   | Health Survey                       | SBH    |
| Jawa Tengah | 1993   | Health Survey                       | SBH    |
| Jawa Tengah | 1994   | Health Survey                       | CBH    |
| Jawa Tengah | 1994   | Health Survey                       | SBH    |
| Jawa Tengah | 1995   | Health Survey                       | SBH    |
| Jawa Tengah | 1996   | Health Survey                       | CBH    |

**Appendix Table 10. Under-5 mortality reference sources by source date and location, 1950-2016**

| Location    | Source | Source years  | Method |
|-------------|--------|---------------|--------|
| Jawa Tengah | 1996   | Health Survey | SBH    |
| Jawa Tengah | 1997   | Health Survey | SBH    |
| Jawa Tengah | 1998   | Health Survey | CBH    |
| Jawa Tengah | 1998   | Health Survey | SBH    |
| Jawa Tengah | 1999   | Health Survey | SBH    |
| Jawa Tengah | 2000   | Health Survey | SBH    |
| Jawa Tengah | 2000   | Health Survey | CBH    |
| Jawa Tengah | 2001   | Health Survey | SBH    |
| Jawa Tengah | 2002   | Health Survey | SBH    |
| Jawa Tengah | 2003   | Health Survey | SBH    |
| Jawa Tengah | 2004   | Health Survey | SBH    |
| Jawa Tengah | 2005   | Health Survey | SBH    |
| Jawa Tengah | 2006   | Health Survey | SBH    |
| Jawa Tengah | 2007   | Health Survey | SBH    |
| Jawa Tengah | 2008   | Health Survey | SBH    |
| Jawa Tengah | 2009   | Health Survey | SBH    |
| Jawa Tengah | 2010   | Health Survey | SBH    |
| Jawa Tengah | 2011   | Health Survey | SBH    |
| Jawa Tengah | 2012   | Health Survey | SBH    |
| Jawa Tengah | 2013   | Health Survey | SBH    |
| Jawa Timur  | 1949   | Census        | CBH    |
| Jawa Timur  | 1950   | Census        | CBH    |
| Jawa Timur  | 1951   | Census        | CBH    |
| Jawa Timur  | 1952   | Census        | CBH    |
| Jawa Timur  | 1953   | Census        | CBH    |
| Jawa Timur  | 1954   | Census        | CBH    |
| Jawa Timur  | 1955   | Census        | CBH    |
| Jawa Timur  | 1956   | Census        | CBH    |
| Jawa Timur  | 1957   | Census        | CBH    |
| Jawa Timur  | 1958   | Census        | CBH    |
| Jawa Timur  | 1959   | Census        | CBH    |
| Jawa Timur  | 1960   | Census        | CBH    |
| Jawa Timur  | 1961   | Census        | CBH    |
| Jawa Timur  | 1962   | Census        | CBH    |
| Jawa Timur  | 1963   | Census        | CBH    |
| Jawa Timur  | 1964   | Census        | CBH    |
| Jawa Timur  | 1965   | Census        | CBH    |
| Jawa Timur  | 1966   | Census        | CBH    |
| Jawa Timur  | 1967   | Census        | CBH    |
| Jawa Timur  | 1968   | Census        | CBH    |
| Jawa Timur  | 1969   | Census        | CBH    |
| Jawa Timur  | 1970   | Census        | CBH    |
| Jawa Timur  | 1971   | Census        | CBH    |
| Jawa Timur  | 1972   | Census        | CBH    |
| Jawa Timur  | 1973   | Census        | CBH    |
| Jawa Timur  | 1974   | Census        | CBH    |
| Jawa Timur  | 1975   | Census        | CBH    |
| Jawa Timur  | 1976   | Census        | CBH    |
| Jawa Timur  | 1977   | Census        | CBH    |
| Jawa Timur  | 1978   | Census        | CBH    |
| Jawa Timur  | 1979   | Census        | CBH    |
| Jawa Timur  | 1980   | Census        | SBH    |
| Jawa Timur  | 1980   | Census        | CBH    |
| Jawa Timur  | 1981   | Census        | CBH    |
| Jawa Timur  | 1982   | Census        | CBH    |
| Jawa Timur  | 1983   | Census        | CBH    |
| Jawa Timur  | 1984   | Census        | CBH    |
| Jawa Timur  | 1985   | Census        | CBH    |
| Jawa Timur  | 1986   | Census        | CBH    |
| Jawa Timur  | 1987   | Census        | CBH    |
| Jawa Timur  | 1988   | Census        | CBH    |
| Jawa Timur  | 1989   | Census        | CBH    |
| Jawa Timur  | 1990   | Census        | CBH    |
| Jawa Timur  | 1990   | Census        | SBH    |
| Jawa Timur  | 1991   | Census        | CBH    |
| Jawa Timur  | 1992   | Census        | CBH    |
| Jawa Timur  | 1993   | Census        | CBH    |

**Appendix Table 10. Under-5 mortality reference sources by source date and location, 1950-2016**

| Location   | Source | Source years                        | Method |
|------------|--------|-------------------------------------|--------|
| Jawa Timur | 1994   | Census                              | CBH    |
| Jawa Timur | 1995   | Census                              | CBH    |
| Jawa Timur | 1996   | Census                              | CBH    |
| Jawa Timur | 1997   | Census                              | CBH    |
| Jawa Timur | 1998   | Census                              | CBH    |
| Jawa Timur | 1999   | Census                              | CBH    |
| Jawa Timur | 2000   | Census                              | CBH    |
| Jawa Timur | 2000   | Census                              | SBH    |
| Jawa Timur | 2002   | Census                              | CBH    |
| Jawa Timur | 2004   | Census                              | CBH    |
| Jawa Timur | 2010   | Census                              | SBH    |
| Jawa Timur | 1963   | Demographic and Health Survey (DHS) | CBH    |
| Jawa Timur | 1965   | Demographic and Health Survey (DHS) | CBH    |
| Jawa Timur | 1967   | Demographic and Health Survey (DHS) | CBH    |
| Jawa Timur | 1969   | Demographic and Health Survey (DHS) | CBH    |
| Jawa Timur | 1971   | Demographic and Health Survey (DHS) | CBH    |
| Jawa Timur | 1973   | Demographic and Health Survey (DHS) | CBH    |
| Jawa Timur | 1975   | Demographic and Health Survey (DHS) | CBH    |
| Jawa Timur | 1977   | Demographic and Health Survey (DHS) | CBH    |
| Jawa Timur | 1979   | Demographic and Health Survey (DHS) | CBH    |
| Jawa Timur | 1981   | Demographic and Health Survey (DHS) | CBH    |
| Jawa Timur | 1983   | Demographic and Health Survey (DHS) | CBH    |
| Jawa Timur | 1985   | Demographic and Health Survey (DHS) | CBH    |
| Jawa Timur | 1987   | Demographic and Health Survey (DHS) | CBH    |
| Jawa Timur | 1987   | Demographic and Health Survey (DHS) | SBH    |
| Jawa Timur | 1989   | Demographic and Health Survey (DHS) | CBH    |
| Jawa Timur | 1991   | Demographic and Health Survey (DHS) | SBH    |
| Jawa Timur | 1991   | Demographic and Health Survey (DHS) | CBH    |
| Jawa Timur | 1993   | Demographic and Health Survey (DHS) | CBH    |
| Jawa Timur | 1994   | Demographic and Health Survey (DHS) | SBH    |
| Jawa Timur | 1995   | Demographic and Health Survey (DHS) | CBH    |
| Jawa Timur | 1997   | Demographic and Health Survey (DHS) | CBH    |
| Jawa Timur | 1997   | Demographic and Health Survey (DHS) | SBH    |
| Jawa Timur | 1999   | Demographic and Health Survey (DHS) | CBH    |
| Jawa Timur | 2001   | Demographic and Health Survey (DHS) | CBH    |
| Jawa Timur | 2003   | Demographic and Health Survey (DHS) | CBH    |
| Jawa Timur | 2003   | Demographic and Health Survey (DHS) | SBH    |
| Jawa Timur | 2005   | Demographic and Health Survey (DHS) | CBH    |
| Jawa Timur | 2007   | Demographic and Health Survey (DHS) | SBH    |
| Jawa Timur | 2007   | Demographic and Health Survey (DHS) | CBH    |
| Jawa Timur | 2009   | Demographic and Health Survey (DHS) | CBH    |
| Jawa Timur | 2011   | Demographic and Health Survey (DHS) | CBH    |
| Jawa Timur | 2012   | Demographic and Health Survey (DHS) | SBH    |
| Jawa Timur | 1972   | Health Survey                       | CBH    |
| Jawa Timur | 1974   | Health Survey                       | CBH    |
| Jawa Timur | 1976   | Health Survey                       | CBH    |
| Jawa Timur | 1978   | Health Survey                       | CBH    |
| Jawa Timur | 1980   | Health Survey                       | CBH    |
| Jawa Timur | 1982   | Health Survey                       | CBH    |
| Jawa Timur | 1984   | Health Survey                       | CBH    |
| Jawa Timur | 1985   | Health Survey                       | SBH    |
| Jawa Timur | 1986   | Health Survey                       | CBH    |
| Jawa Timur | 1988   | Health Survey                       | CBH    |
| Jawa Timur | 1990   | Health Survey                       | CBH    |
| Jawa Timur | 1992   | Health Survey                       | CBH    |
| Jawa Timur | 1992   | Health Survey                       | SBH    |
| Jawa Timur | 1993   | Health Survey                       | SBH    |
| Jawa Timur | 1994   | Health Survey                       | CBH    |
| Jawa Timur | 1994   | Health Survey                       | SBH    |
| Jawa Timur | 1995   | Health Survey                       | SBH    |
| Jawa Timur | 1996   | Health Survey                       | SBH    |
| Jawa Timur | 1996   | Health Survey                       | CBH    |
| Jawa Timur | 1997   | Health Survey                       | SBH    |
| Jawa Timur | 1998   | Health Survey                       | SBH    |
| Jawa Timur | 1998   | Health Survey                       | CBH    |
| Jawa Timur | 1999   | Health Survey                       | SBH    |
| Jawa Timur | 2000   | Health Survey                       | CBH    |

**Appendix Table 10. Under-5 mortality reference sources by source date and location, 1950-2016**

| Location         | Source | Source years                        | Method |
|------------------|--------|-------------------------------------|--------|
| Jawa Timur       | 2000   | Health Survey                       | SBH    |
| Jawa Timur       | 2001   | Health Survey                       | SBH    |
| Jawa Timur       | 2002   | Health Survey                       | SBH    |
| Jawa Timur       | 2003   | Health Survey                       | SBH    |
| Jawa Timur       | 2004   | Health Survey                       | SBH    |
| Jawa Timur       | 2005   | Health Survey                       | SBH    |
| Jawa Timur       | 2006   | Health Survey                       | SBH    |
| Jawa Timur       | 2007   | Health Survey                       | SBH    |
| Jawa Timur       | 2008   | Health Survey                       | SBH    |
| Jawa Timur       | 2009   | Health Survey                       | SBH    |
| Jawa Timur       | 2010   | Health Survey                       | SBH    |
| Jawa Timur       | 2011   | Health Survey                       | SBH    |
| Jawa Timur       | 2012   | Health Survey                       | SBH    |
| Jawa Timur       | 2013   | Health Survey                       | SBH    |
| Kalimantan Barat | 1962   | Census                              | CBH    |
| Kalimantan Barat | 1963   | Census                              | CBH    |
| Kalimantan Barat | 1964   | Census                              | CBH    |
| Kalimantan Barat | 1965   | Census                              | CBH    |
| Kalimantan Barat | 1966   | Census                              | CBH    |
| Kalimantan Barat | 1967   | Census                              | CBH    |
| Kalimantan Barat | 1968   | Census                              | CBH    |
| Kalimantan Barat | 1969   | Census                              | CBH    |
| Kalimantan Barat | 1970   | Census                              | CBH    |
| Kalimantan Barat | 1971   | Census                              | CBH    |
| Kalimantan Barat | 1972   | Census                              | CBH    |
| Kalimantan Barat | 1973   | Census                              | CBH    |
| Kalimantan Barat | 1974   | Census                              | CBH    |
| Kalimantan Barat | 1975   | Census                              | CBH    |
| Kalimantan Barat | 1976   | Census                              | CBH    |
| Kalimantan Barat | 1977   | Census                              | CBH    |
| Kalimantan Barat | 1978   | Census                              | CBH    |
| Kalimantan Barat | 1979   | Census                              | CBH    |
| Kalimantan Barat | 1980   | Census                              | CBH    |
| Kalimantan Barat | 1980   | Census                              | SBH    |
| Kalimantan Barat | 1981   | Census                              | CBH    |
| Kalimantan Barat | 1982   | Census                              | CBH    |
| Kalimantan Barat | 1983   | Census                              | CBH    |
| Kalimantan Barat | 1984   | Census                              | CBH    |
| Kalimantan Barat | 1985   | Census                              | CBH    |
| Kalimantan Barat | 1986   | Census                              | CBH    |
| Kalimantan Barat | 1987   | Census                              | CBH    |
| Kalimantan Barat | 1988   | Census                              | CBH    |
| Kalimantan Barat | 1989   | Census                              | CBH    |
| Kalimantan Barat | 1990   | Census                              | CBH    |
| Kalimantan Barat | 1990   | Census                              | SBH    |
| Kalimantan Barat | 1991   | Census                              | CBH    |
| Kalimantan Barat | 1992   | Census                              | CBH    |
| Kalimantan Barat | 1993   | Census                              | CBH    |
| Kalimantan Barat | 1994   | Census                              | CBH    |
| Kalimantan Barat | 1995   | Census                              | CBH    |
| Kalimantan Barat | 1996   | Census                              | CBH    |
| Kalimantan Barat | 1997   | Census                              | CBH    |
| Kalimantan Barat | 1998   | Census                              | CBH    |
| Kalimantan Barat | 1999   | Census                              | CBH    |
| Kalimantan Barat | 2000   | Census                              | CBH    |
| Kalimantan Barat | 2000   | Census                              | SBH    |
| Kalimantan Barat | 2002   | Census                              | CBH    |
| Kalimantan Barat | 2004   | Census                              | CBH    |
| Kalimantan Barat | 2010   | Census                              | SBH    |
| Kalimantan Barat | 1969   | Demographic and Health Survey (DHS) | CBH    |
| Kalimantan Barat | 1971   | Demographic and Health Survey (DHS) | CBH    |
| Kalimantan Barat | 1973   | Demographic and Health Survey (DHS) | CBH    |
| Kalimantan Barat | 1975   | Demographic and Health Survey (DHS) | CBH    |
| Kalimantan Barat | 1977   | Demographic and Health Survey (DHS) | CBH    |
| Kalimantan Barat | 1979   | Demographic and Health Survey (DHS) | CBH    |
| Kalimantan Barat | 1981   | Demographic and Health Survey (DHS) | CBH    |
| Kalimantan Barat | 1983   | Demographic and Health Survey (DHS) | CBH    |



**Appendix Table 10. Under-5 mortality reference sources by source date and location, 1950-2016**

| Location           | Source | Source years                        | Method |
|--------------------|--------|-------------------------------------|--------|
| Kalimantan Barat   | 1985   | Demographic and Health Survey (DHS) | CBH    |
| Kalimantan Barat   | 1987   | Demographic and Health Survey (DHS) | SBH    |
| Kalimantan Barat   | 1987   | Demographic and Health Survey (DHS) | CBH    |
| Kalimantan Barat   | 1989   | Demographic and Health Survey (DHS) | CBH    |
| Kalimantan Barat   | 1991   | Demographic and Health Survey (DHS) | CBH    |
| Kalimantan Barat   | 1991   | Demographic and Health Survey (DHS) | SBH    |
| Kalimantan Barat   | 1993   | Demographic and Health Survey (DHS) | CBH    |
| Kalimantan Barat   | 1994   | Demographic and Health Survey (DHS) | SBH    |
| Kalimantan Barat   | 1995   | Demographic and Health Survey (DHS) | CBH    |
| Kalimantan Barat   | 1997   | Demographic and Health Survey (DHS) | CBH    |
| Kalimantan Barat   | 1997   | Demographic and Health Survey (DHS) | SBH    |
| Kalimantan Barat   | 1999   | Demographic and Health Survey (DHS) | CBH    |
| Kalimantan Barat   | 2001   | Demographic and Health Survey (DHS) | CBH    |
| Kalimantan Barat   | 2003   | Demographic and Health Survey (DHS) | SBH    |
| Kalimantan Barat   | 2003   | Demographic and Health Survey (DHS) | CBH    |
| Kalimantan Barat   | 2005   | Demographic and Health Survey (DHS) | CBH    |
| Kalimantan Barat   | 2007   | Demographic and Health Survey (DHS) | SBH    |
| Kalimantan Barat   | 2007   | Demographic and Health Survey (DHS) | CBH    |
| Kalimantan Barat   | 2009   | Demographic and Health Survey (DHS) | CBH    |
| Kalimantan Barat   | 2011   | Demographic and Health Survey (DHS) | CBH    |
| Kalimantan Barat   | 2012   | Demographic and Health Survey (DHS) | SBH    |
| Kalimantan Barat   | 1985   | Health Survey                       | SBH    |
| Kalimantan Barat   | 1992   | Health Survey                       | SBH    |
| Kalimantan Barat   | 1993   | Health Survey                       | SBH    |
| Kalimantan Barat   | 1994   | Health Survey                       | SBH    |
| Kalimantan Barat   | 1995   | Health Survey                       | SBH    |
| Kalimantan Barat   | 1996   | Health Survey                       | SBH    |
| Kalimantan Barat   | 1998   | Health Survey                       | SBH    |
| Kalimantan Barat   | 1999   | Health Survey                       | SBH    |
| Kalimantan Barat   | 2000   | Health Survey                       | SBH    |
| Kalimantan Barat   | 2001   | Health Survey                       | SBH    |
| Kalimantan Barat   | 2002   | Health Survey                       | SBH    |
| Kalimantan Barat   | 2003   | Health Survey                       | SBH    |
| Kalimantan Barat   | 2004   | Health Survey                       | SBH    |
| Kalimantan Barat   | 2005   | Health Survey                       | SBH    |
| Kalimantan Barat   | 2006   | Health Survey                       | SBH    |
| Kalimantan Barat   | 2007   | Health Survey                       | SBH    |
| Kalimantan Barat   | 2008   | Health Survey                       | SBH    |
| Kalimantan Barat   | 2009   | Health Survey                       | SBH    |
| Kalimantan Barat   | 2010   | Health Survey                       | SBH    |
| Kalimantan Barat   | 2011   | Health Survey                       | SBH    |
| Kalimantan Barat   | 2012   | Health Survey                       | SBH    |
| Kalimantan Barat   | 2013   | Health Survey                       | SBH    |
| Kalimantan Selatan | 1958   | Census                              | CBH    |
| Kalimantan Selatan | 1960   | Census                              | CBH    |
| Kalimantan Selatan | 1962   | Census                              | CBH    |
| Kalimantan Selatan | 1963   | Census                              | CBH    |
| Kalimantan Selatan | 1964   | Census                              | CBH    |
| Kalimantan Selatan | 1965   | Census                              | CBH    |
| Kalimantan Selatan | 1966   | Census                              | CBH    |
| Kalimantan Selatan | 1967   | Census                              | CBH    |
| Kalimantan Selatan | 1968   | Census                              | CBH    |
| Kalimantan Selatan | 1969   | Census                              | CBH    |
| Kalimantan Selatan | 1970   | Census                              | CBH    |
| Kalimantan Selatan | 1971   | Census                              | CBH    |
| Kalimantan Selatan | 1972   | Census                              | CBH    |
| Kalimantan Selatan | 1973   | Census                              | CBH    |
| Kalimantan Selatan | 1974   | Census                              | CBH    |
| Kalimantan Selatan | 1975   | Census                              | CBH    |
| Kalimantan Selatan | 1976   | Census                              | CBH    |
| Kalimantan Selatan | 1977   | Census                              | CBH    |
| Kalimantan Selatan | 1978   | Census                              | CBH    |
| Kalimantan Selatan | 1979   | Census                              | CBH    |
| Kalimantan Selatan | 1980   | Census                              | SBH    |
| Kalimantan Selatan | 1980   | Census                              | CBH    |
| Kalimantan Selatan | 1981   | Census                              | CBH    |
| Kalimantan Selatan | 1982   | Census                              | CBH    |

**Appendix Table 10. Under-5 mortality reference sources by source date and location, 1950-2016**

| Location           | Source | Source years                        | Method |
|--------------------|--------|-------------------------------------|--------|
| Kalimantan Selatan | 1983   | Census                              | CBH    |
| Kalimantan Selatan | 1984   | Census                              | CBH    |
| Kalimantan Selatan | 1985   | Census                              | CBH    |
| Kalimantan Selatan | 1986   | Census                              | CBH    |
| Kalimantan Selatan | 1987   | Census                              | CBH    |
| Kalimantan Selatan | 1988   | Census                              | CBH    |
| Kalimantan Selatan | 1989   | Census                              | CBH    |
| Kalimantan Selatan | 1990   | Census                              | SBH    |
| Kalimantan Selatan | 1990   | Census                              | CBH    |
| Kalimantan Selatan | 1991   | Census                              | CBH    |
| Kalimantan Selatan | 1992   | Census                              | CBH    |
| Kalimantan Selatan | 1993   | Census                              | CBH    |
| Kalimantan Selatan | 1994   | Census                              | CBH    |
| Kalimantan Selatan | 1995   | Census                              | CBH    |
| Kalimantan Selatan | 1996   | Census                              | CBH    |
| Kalimantan Selatan | 1997   | Census                              | CBH    |
| Kalimantan Selatan | 1998   | Census                              | CBH    |
| Kalimantan Selatan | 1999   | Census                              | CBH    |
| Kalimantan Selatan | 2000   | Census                              | SBH    |
| Kalimantan Selatan | 2000   | Census                              | CBH    |
| Kalimantan Selatan | 2002   | Census                              | CBH    |
| Kalimantan Selatan | 2004   | Census                              | CBH    |
| Kalimantan Selatan | 2010   | Census                              | SBH    |
| Kalimantan Selatan | 1967   | Demographic and Health Survey (DHS) | CBH    |
| Kalimantan Selatan | 1969   | Demographic and Health Survey (DHS) | CBH    |
| Kalimantan Selatan | 1971   | Demographic and Health Survey (DHS) | CBH    |
| Kalimantan Selatan | 1973   | Demographic and Health Survey (DHS) | CBH    |
| Kalimantan Selatan | 1975   | Demographic and Health Survey (DHS) | CBH    |
| Kalimantan Selatan | 1977   | Demographic and Health Survey (DHS) | CBH    |
| Kalimantan Selatan | 1979   | Demographic and Health Survey (DHS) | CBH    |
| Kalimantan Selatan | 1981   | Demographic and Health Survey (DHS) | CBH    |
| Kalimantan Selatan | 1983   | Demographic and Health Survey (DHS) | CBH    |
| Kalimantan Selatan | 1985   | Demographic and Health Survey (DHS) | CBH    |
| Kalimantan Selatan | 1987   | Demographic and Health Survey (DHS) | CBH    |
| Kalimantan Selatan | 1987   | Demographic and Health Survey (DHS) | SBH    |
| Kalimantan Selatan | 1989   | Demographic and Health Survey (DHS) | CBH    |
| Kalimantan Selatan | 1991   | Demographic and Health Survey (DHS) | SBH    |
| Kalimantan Selatan | 1991   | Demographic and Health Survey (DHS) | CBH    |
| Kalimantan Selatan | 1993   | Demographic and Health Survey (DHS) | CBH    |
| Kalimantan Selatan | 1994   | Demographic and Health Survey (DHS) | SBH    |
| Kalimantan Selatan | 1995   | Demographic and Health Survey (DHS) | CBH    |
| Kalimantan Selatan | 1997   | Demographic and Health Survey (DHS) | SBH    |
| Kalimantan Selatan | 1997   | Demographic and Health Survey (DHS) | CBH    |
| Kalimantan Selatan | 1999   | Demographic and Health Survey (DHS) | CBH    |
| Kalimantan Selatan | 2001   | Demographic and Health Survey (DHS) | CBH    |
| Kalimantan Selatan | 2003   | Demographic and Health Survey (DHS) | CBH    |
| Kalimantan Selatan | 2003   | Demographic and Health Survey (DHS) | SBH    |
| Kalimantan Selatan | 2005   | Demographic and Health Survey (DHS) | CBH    |
| Kalimantan Selatan | 2007   | Demographic and Health Survey (DHS) | SBH    |
| Kalimantan Selatan | 2007   | Demographic and Health Survey (DHS) | CBH    |
| Kalimantan Selatan | 2009   | Demographic and Health Survey (DHS) | CBH    |
| Kalimantan Selatan | 2011   | Demographic and Health Survey (DHS) | CBH    |
| Kalimantan Selatan | 2012   | Demographic and Health Survey (DHS) | SBH    |
| Kalimantan Selatan | 1980   | Health Survey                       | CBH    |
| Kalimantan Selatan | 1982   | Health Survey                       | CBH    |
| Kalimantan Selatan | 1984   | Health Survey                       | CBH    |
| Kalimantan Selatan | 1985   | Health Survey                       | SBH    |
| Kalimantan Selatan | 1986   | Health Survey                       | CBH    |
| Kalimantan Selatan | 1988   | Health Survey                       | CBH    |
| Kalimantan Selatan | 1990   | Health Survey                       | CBH    |
| Kalimantan Selatan | 1992   | Health Survey                       | SBH    |
| Kalimantan Selatan | 1992   | Health Survey                       | CBH    |
| Kalimantan Selatan | 1993   | Health Survey                       | SBH    |
| Kalimantan Selatan | 1994   | Health Survey                       | SBH    |
| Kalimantan Selatan | 1994   | Health Survey                       | CBH    |
| Kalimantan Selatan | 1995   | Health Survey                       | SBH    |
| Kalimantan Selatan | 1996   | Health Survey                       | CBH    |

**Appendix Table 10. Under-5 mortality reference sources by source date and location, 1950-2016**

| Location           | Source | Source years                        | Method |
|--------------------|--------|-------------------------------------|--------|
| Kalimantan Selatan | 1996   | Health Survey                       | SBH    |
| Kalimantan Selatan | 1997   | Health Survey                       | SBH    |
| Kalimantan Selatan | 1998   | Health Survey                       | CBH    |
| Kalimantan Selatan | 1998   | Health Survey                       | SBH    |
| Kalimantan Selatan | 1999   | Health Survey                       | SBH    |
| Kalimantan Selatan | 2000   | Health Survey                       | SBH    |
| Kalimantan Selatan | 2000   | Health Survey                       | CBH    |
| Kalimantan Selatan | 2001   | Health Survey                       | SBH    |
| Kalimantan Selatan | 2002   | Health Survey                       | SBH    |
| Kalimantan Selatan | 2003   | Health Survey                       | SBH    |
| Kalimantan Selatan | 2004   | Health Survey                       | SBH    |
| Kalimantan Selatan | 2005   | Health Survey                       | SBH    |
| Kalimantan Selatan | 2006   | Health Survey                       | SBH    |
| Kalimantan Selatan | 2007   | Health Survey                       | SBH    |
| Kalimantan Selatan | 2008   | Health Survey                       | SBH    |
| Kalimantan Selatan | 2009   | Health Survey                       | SBH    |
| Kalimantan Selatan | 2010   | Health Survey                       | SBH    |
| Kalimantan Selatan | 2011   | Health Survey                       | SBH    |
| Kalimantan Selatan | 2012   | Health Survey                       | SBH    |
| Kalimantan Selatan | 2013   | Health Survey                       | SBH    |
| Kalimantan Tengah  | 1964   | Census                              | CBH    |
| Kalimantan Tengah  | 1966   | Census                              | CBH    |
| Kalimantan Tengah  | 1968   | Census                              | CBH    |
| Kalimantan Tengah  | 1969   | Census                              | CBH    |
| Kalimantan Tengah  | 1970   | Census                              | CBH    |
| Kalimantan Tengah  | 1971   | Census                              | CBH    |
| Kalimantan Tengah  | 1972   | Census                              | CBH    |
| Kalimantan Tengah  | 1973   | Census                              | CBH    |
| Kalimantan Tengah  | 1974   | Census                              | CBH    |
| Kalimantan Tengah  | 1975   | Census                              | CBH    |
| Kalimantan Tengah  | 1976   | Census                              | CBH    |
| Kalimantan Tengah  | 1977   | Census                              | CBH    |
| Kalimantan Tengah  | 1978   | Census                              | CBH    |
| Kalimantan Tengah  | 1979   | Census                              | CBH    |
| Kalimantan Tengah  | 1980   | Census                              | CBH    |
| Kalimantan Tengah  | 1980   | Census                              | SBH    |
| Kalimantan Tengah  | 1981   | Census                              | CBH    |
| Kalimantan Tengah  | 1982   | Census                              | CBH    |
| Kalimantan Tengah  | 1983   | Census                              | CBH    |
| Kalimantan Tengah  | 1984   | Census                              | CBH    |
| Kalimantan Tengah  | 1985   | Census                              | CBH    |
| Kalimantan Tengah  | 1986   | Census                              | CBH    |
| Kalimantan Tengah  | 1987   | Census                              | CBH    |
| Kalimantan Tengah  | 1988   | Census                              | CBH    |
| Kalimantan Tengah  | 1989   | Census                              | CBH    |
| Kalimantan Tengah  | 1990   | Census                              | SBH    |
| Kalimantan Tengah  | 1990   | Census                              | CBH    |
| Kalimantan Tengah  | 1991   | Census                              | CBH    |
| Kalimantan Tengah  | 1992   | Census                              | CBH    |
| Kalimantan Tengah  | 1993   | Census                              | CBH    |
| Kalimantan Tengah  | 1994   | Census                              | CBH    |
| Kalimantan Tengah  | 1995   | Census                              | CBH    |
| Kalimantan Tengah  | 1996   | Census                              | CBH    |
| Kalimantan Tengah  | 1997   | Census                              | CBH    |
| Kalimantan Tengah  | 1998   | Census                              | CBH    |
| Kalimantan Tengah  | 1999   | Census                              | CBH    |
| Kalimantan Tengah  | 2000   | Census                              | CBH    |
| Kalimantan Tengah  | 2000   | Census                              | SBH    |
| Kalimantan Tengah  | 2002   | Census                              | CBH    |
| Kalimantan Tengah  | 2004   | Census                              | CBH    |
| Kalimantan Tengah  | 2010   | Census                              | SBH    |
| Kalimantan Tengah  | 1973   | Demographic and Health Survey (DHS) | CBH    |
| Kalimantan Tengah  | 1975   | Demographic and Health Survey (DHS) | CBH    |
| Kalimantan Tengah  | 1977   | Demographic and Health Survey (DHS) | CBH    |
| Kalimantan Tengah  | 1979   | Demographic and Health Survey (DHS) | CBH    |
| Kalimantan Tengah  | 1981   | Demographic and Health Survey (DHS) | CBH    |
| Kalimantan Tengah  | 1983   | Demographic and Health Survey (DHS) | CBH    |

**Appendix Table 10. Under-5 mortality reference sources by source date and location, 1950-2016**

| Location          | Source | Source years                        | Method |
|-------------------|--------|-------------------------------------|--------|
| Kalimantan Tengah | 1985   | Demographic and Health Survey (DHS) | CBH    |
| Kalimantan Tengah | 1987   | Demographic and Health Survey (DHS) | CBH    |
| Kalimantan Tengah | 1989   | Demographic and Health Survey (DHS) | CBH    |
| Kalimantan Tengah | 1991   | Demographic and Health Survey (DHS) | SBH    |
| Kalimantan Tengah | 1991   | Demographic and Health Survey (DHS) | CBH    |
| Kalimantan Tengah | 1993   | Demographic and Health Survey (DHS) | CBH    |
| Kalimantan Tengah | 1994   | Demographic and Health Survey (DHS) | SBH    |
| Kalimantan Tengah | 1995   | Demographic and Health Survey (DHS) | CBH    |
| Kalimantan Tengah | 1997   | Demographic and Health Survey (DHS) | SBH    |
| Kalimantan Tengah | 1997   | Demographic and Health Survey (DHS) | CBH    |
| Kalimantan Tengah | 1999   | Demographic and Health Survey (DHS) | CBH    |
| Kalimantan Tengah | 2001   | Demographic and Health Survey (DHS) | CBH    |
| Kalimantan Tengah | 2003   | Demographic and Health Survey (DHS) | SBH    |
| Kalimantan Tengah | 2003   | Demographic and Health Survey (DHS) | CBH    |
| Kalimantan Tengah | 2005   | Demographic and Health Survey (DHS) | CBH    |
| Kalimantan Tengah | 2007   | Demographic and Health Survey (DHS) | SBH    |
| Kalimantan Tengah | 2007   | Demographic and Health Survey (DHS) | CBH    |
| Kalimantan Tengah | 2009   | Demographic and Health Survey (DHS) | CBH    |
| Kalimantan Tengah | 2011   | Demographic and Health Survey (DHS) | CBH    |
| Kalimantan Tengah | 2012   | Demographic and Health Survey (DHS) | SBH    |
| Kalimantan Tengah | 1985   | Health Survey                       | SBH    |
| Kalimantan Tengah | 1987   | Health Survey                       | CBH    |
| Kalimantan Tengah | 1992   | Health Survey                       | SBH    |
| Kalimantan Tengah | 1993   | Health Survey                       | SBH    |
| Kalimantan Tengah | 1994   | Health Survey                       | SBH    |
| Kalimantan Tengah | 1995   | Health Survey                       | SBH    |
| Kalimantan Tengah | 1996   | Health Survey                       | SBH    |
| Kalimantan Tengah | 1998   | Health Survey                       | SBH    |
| Kalimantan Tengah | 1999   | Health Survey                       | SBH    |
| Kalimantan Tengah | 2000   | Health Survey                       | SBH    |
| Kalimantan Tengah | 2001   | Health Survey                       | SBH    |
| Kalimantan Tengah | 2002   | Health Survey                       | SBH    |
| Kalimantan Tengah | 2003   | Health Survey                       | SBH    |
| Kalimantan Tengah | 2004   | Health Survey                       | SBH    |
| Kalimantan Tengah | 2005   | Health Survey                       | SBH    |
| Kalimantan Tengah | 2006   | Health Survey                       | SBH    |
| Kalimantan Tengah | 2007   | Health Survey                       | SBH    |
| Kalimantan Tengah | 2008   | Health Survey                       | SBH    |
| Kalimantan Tengah | 2009   | Health Survey                       | SBH    |
| Kalimantan Tengah | 2010   | Health Survey                       | SBH    |
| Kalimantan Tengah | 2011   | Health Survey                       | SBH    |
| Kalimantan Tengah | 2012   | Health Survey                       | SBH    |
| Kalimantan Tengah | 2013   | Health Survey                       | SBH    |
| Kalimantan Timur  | 1965   | Census                              | CBH    |
| Kalimantan Timur  | 1966   | Census                              | CBH    |
| Kalimantan Timur  | 1967   | Census                              | CBH    |
| Kalimantan Timur  | 1968   | Census                              | CBH    |
| Kalimantan Timur  | 1969   | Census                              | CBH    |
| Kalimantan Timur  | 1970   | Census                              | CBH    |
| Kalimantan Timur  | 1971   | Census                              | CBH    |
| Kalimantan Timur  | 1972   | Census                              | CBH    |
| Kalimantan Timur  | 1973   | Census                              | CBH    |
| Kalimantan Timur  | 1974   | Census                              | CBH    |
| Kalimantan Timur  | 1975   | Census                              | CBH    |
| Kalimantan Timur  | 1976   | Census                              | CBH    |
| Kalimantan Timur  | 1977   | Census                              | CBH    |
| Kalimantan Timur  | 1978   | Census                              | CBH    |
| Kalimantan Timur  | 1979   | Census                              | CBH    |
| Kalimantan Timur  | 1980   | Census                              | CBH    |
| Kalimantan Timur  | 1980   | Census                              | SBH    |
| Kalimantan Timur  | 1981   | Census                              | CBH    |
| Kalimantan Timur  | 1982   | Census                              | CBH    |
| Kalimantan Timur  | 1983   | Census                              | CBH    |
| Kalimantan Timur  | 1984   | Census                              | CBH    |
| Kalimantan Timur  | 1985   | Census                              | CBH    |
| Kalimantan Timur  | 1986   | Census                              | CBH    |
| Kalimantan Timur  | 1987   | Census                              | CBH    |

**Appendix Table 10. Under-5 mortality reference sources by source date and location, 1950-2016**

| Location         | Source | Source years                        | Method |
|------------------|--------|-------------------------------------|--------|
| Kalimantan Timur | 1988   | Census                              | CBH    |
| Kalimantan Timur | 1989   | Census                              | CBH    |
| Kalimantan Timur | 1990   | Census                              | CBH    |
| Kalimantan Timur | 1990   | Census                              | SBH    |
| Kalimantan Timur | 1991   | Census                              | CBH    |
| Kalimantan Timur | 1992   | Census                              | CBH    |
| Kalimantan Timur | 1993   | Census                              | CBH    |
| Kalimantan Timur | 1994   | Census                              | CBH    |
| Kalimantan Timur | 1995   | Census                              | CBH    |
| Kalimantan Timur | 1996   | Census                              | CBH    |
| Kalimantan Timur | 1997   | Census                              | CBH    |
| Kalimantan Timur | 1998   | Census                              | CBH    |
| Kalimantan Timur | 1999   | Census                              | CBH    |
| Kalimantan Timur | 2000   | Census                              | SBH    |
| Kalimantan Timur | 2000   | Census                              | CBH    |
| Kalimantan Timur | 2002   | Census                              | CBH    |
| Kalimantan Timur | 2004   | Census                              | CBH    |
| Kalimantan Timur | 2010   | Census                              | SBH    |
| Kalimantan Timur | 1973   | Demographic and Health Survey (DHS) | CBH    |
| Kalimantan Timur | 1975   | Demographic and Health Survey (DHS) | CBH    |
| Kalimantan Timur | 1977   | Demographic and Health Survey (DHS) | CBH    |
| Kalimantan Timur | 1979   | Demographic and Health Survey (DHS) | CBH    |
| Kalimantan Timur | 1981   | Demographic and Health Survey (DHS) | CBH    |
| Kalimantan Timur | 1983   | Demographic and Health Survey (DHS) | CBH    |
| Kalimantan Timur | 1985   | Demographic and Health Survey (DHS) | CBH    |
| Kalimantan Timur | 1987   | Demographic and Health Survey (DHS) | CBH    |
| Kalimantan Timur | 1989   | Demographic and Health Survey (DHS) | CBH    |
| Kalimantan Timur | 1991   | Demographic and Health Survey (DHS) | SBH    |
| Kalimantan Timur | 1991   | Demographic and Health Survey (DHS) | CBH    |
| Kalimantan Timur | 1993   | Demographic and Health Survey (DHS) | CBH    |
| Kalimantan Timur | 1994   | Demographic and Health Survey (DHS) | SBH    |
| Kalimantan Timur | 1995   | Demographic and Health Survey (DHS) | CBH    |
| Kalimantan Timur | 1997   | Demographic and Health Survey (DHS) | CBH    |
| Kalimantan Timur | 1997   | Demographic and Health Survey (DHS) | SBH    |
| Kalimantan Timur | 1999   | Demographic and Health Survey (DHS) | CBH    |
| Kalimantan Timur | 2001   | Demographic and Health Survey (DHS) | CBH    |
| Kalimantan Timur | 2003   | Demographic and Health Survey (DHS) | CBH    |
| Kalimantan Timur | 2003   | Demographic and Health Survey (DHS) | SBH    |
| Kalimantan Timur | 2005   | Demographic and Health Survey (DHS) | CBH    |
| Kalimantan Timur | 2007   | Demographic and Health Survey (DHS) | CBH    |
| Kalimantan Timur | 2007   | Demographic and Health Survey (DHS) | SBH    |
| Kalimantan Timur | 2009   | Demographic and Health Survey (DHS) | CBH    |
| Kalimantan Timur | 2011   | Demographic and Health Survey (DHS) | CBH    |
| Kalimantan Timur | 2012   | Demographic and Health Survey (DHS) | SBH    |
| Kalimantan Timur | 1985   | Health Survey                       | SBH    |
| Kalimantan Timur | 1992   | Health Survey                       | SBH    |
| Kalimantan Timur | 1993   | Health Survey                       | SBH    |
| Kalimantan Timur | 1994   | Health Survey                       | SBH    |
| Kalimantan Timur | 1995   | Health Survey                       | SBH    |
| Kalimantan Timur | 1995   | Health Survey                       | CBH    |
| Kalimantan Timur | 1996   | Health Survey                       | SBH    |
| Kalimantan Timur | 1997   | Health Survey                       | CBH    |
| Kalimantan Timur | 1998   | Health Survey                       | SBH    |
| Kalimantan Timur | 1999   | Health Survey                       | SBH    |
| Kalimantan Timur | 1999   | Health Survey                       | CBH    |
| Kalimantan Timur | 2000   | Health Survey                       | SBH    |
| Kalimantan Timur | 2001   | Health Survey                       | SBH    |
| Kalimantan Timur | 2001   | Health Survey                       | CBH    |
| Kalimantan Timur | 2002   | Health Survey                       | SBH    |
| Kalimantan Timur | 2003   | Health Survey                       | CBH    |
| Kalimantan Timur | 2003   | Health Survey                       | SBH    |
| Kalimantan Timur | 2004   | Health Survey                       | SBH    |
| Kalimantan Timur | 2005   | Health Survey                       | SBH    |
| Kalimantan Timur | 2005   | Health Survey                       | CBH    |
| Kalimantan Timur | 2006   | Health Survey                       | SBH    |
| Kalimantan Timur | 2007   | Health Survey                       | CBH    |
| Kalimantan Timur | 2007   | Health Survey                       | SBH    |

**Appendix Table 10. Under-5 mortality reference sources by source date and location, 1950-2016**

| Location         | Source | Source years                        | Method |
|------------------|--------|-------------------------------------|--------|
| Kalimantan Timur | 2008   | Health Survey                       | SBH    |
| Kalimantan Timur | 2009   | Health Survey                       | SBH    |
| Kalimantan Timur | 2009   | Health Survey                       | CBH    |
| Kalimantan Timur | 2010   | Health Survey                       | SBH    |
| Kalimantan Timur | 2011   | Health Survey                       | SBH    |
| Kalimantan Timur | 2011   | Health Survey                       | CBH    |
| Kalimantan Timur | 2012   | Health Survey                       | SBH    |
| Kalimantan Timur | 2013   | Health Survey                       | SBH    |
| Kalimantan Utara | 1972   | Census                              | CBH    |
| Kalimantan Utara | 1974   | Census                              | CBH    |
| Kalimantan Utara | 1975   | Census                              | CBH    |
| Kalimantan Utara | 1976   | Census                              | CBH    |
| Kalimantan Utara | 1977   | Census                              | CBH    |
| Kalimantan Utara | 1978   | Census                              | CBH    |
| Kalimantan Utara | 1979   | Census                              | CBH    |
| Kalimantan Utara | 1980   | Census                              | SBH    |
| Kalimantan Utara | 1980   | Census                              | CBH    |
| Kalimantan Utara | 1981   | Census                              | CBH    |
| Kalimantan Utara | 1982   | Census                              | CBH    |
| Kalimantan Utara | 1983   | Census                              | CBH    |
| Kalimantan Utara | 1984   | Census                              | CBH    |
| Kalimantan Utara | 1985   | Census                              | CBH    |
| Kalimantan Utara | 1986   | Census                              | CBH    |
| Kalimantan Utara | 1987   | Census                              | CBH    |
| Kalimantan Utara | 1988   | Census                              | CBH    |
| Kalimantan Utara | 1989   | Census                              | CBH    |
| Kalimantan Utara | 1990   | Census                              | SBH    |
| Kalimantan Utara | 1990   | Census                              | CBH    |
| Kalimantan Utara | 1991   | Census                              | CBH    |
| Kalimantan Utara | 1992   | Census                              | CBH    |
| Kalimantan Utara | 1993   | Census                              | CBH    |
| Kalimantan Utara | 1994   | Census                              | CBH    |
| Kalimantan Utara | 1995   | Census                              | CBH    |
| Kalimantan Utara | 1996   | Census                              | CBH    |
| Kalimantan Utara | 1997   | Census                              | CBH    |
| Kalimantan Utara | 1998   | Census                              | CBH    |
| Kalimantan Utara | 1999   | Census                              | CBH    |
| Kalimantan Utara | 2000   | Census                              | SBH    |
| Kalimantan Utara | 2000   | Census                              | CBH    |
| Kalimantan Utara | 2002   | Census                              | CBH    |
| Kalimantan Utara | 2004   | Census                              | CBH    |
| Kalimantan Utara | 2010   | Census                              | SBH    |
| Kalimantan Utara | 1989   | Demographic and Health Survey (DHS) | CBH    |
| Kalimantan Utara | 1991   | Demographic and Health Survey (DHS) | CBH    |
| Kalimantan Utara | 1993   | Demographic and Health Survey (DHS) | CBH    |
| Kalimantan Utara | 1995   | Demographic and Health Survey (DHS) | CBH    |
| Kalimantan Utara | 1997   | Demographic and Health Survey (DHS) | CBH    |
| Kalimantan Utara | 1999   | Demographic and Health Survey (DHS) | CBH    |
| Kalimantan Utara | 2001   | Demographic and Health Survey (DHS) | CBH    |
| Kalimantan Utara | 2003   | Demographic and Health Survey (DHS) | CBH    |
| Kalimantan Utara | 2005   | Demographic and Health Survey (DHS) | CBH    |
| Kalimantan Utara | 2007   | Demographic and Health Survey (DHS) | CBH    |
| Kalimantan Utara | 2009   | Demographic and Health Survey (DHS) | CBH    |
| Kalimantan Utara | 2011   | Demographic and Health Survey (DHS) | CBH    |
| Kalimantan Utara | 1985   | Health Survey                       | SBH    |
| Kalimantan Utara | 1995   | Health Survey                       | SBH    |
| Kalimantan Utara | 2001   | Health Survey                       | SBH    |
| Kalimantan Utara | 2003   | Health Survey                       | SBH    |
| Kalimantan Utara | 2004   | Health Survey                       | SBH    |
| Kalimantan Utara | 2005   | Health Survey                       | SBH    |
| Kalimantan Utara | 2006   | Health Survey                       | SBH    |
| Kalimantan Utara | 2008   | Health Survey                       | SBH    |
| Kalimantan Utara | 2009   | Health Survey                       | SBH    |
| Kalimantan Utara | 2010   | Health Survey                       | SBH    |
| Kalimantan Utara | 2011   | Health Survey                       | SBH    |
| Kalimantan Utara | 2012   | Health Survey                       | SBH    |
| Kalimantan Utara | 2013   | Health Survey                       | SBH    |

**Appendix Table 10. Under-5 mortality reference sources by source date and location, 1950-2016**

| Location       | Source | Source years                        | Method |
|----------------|--------|-------------------------------------|--------|
| Kepulauan Riau | 1970   | Census                              | CBH    |
| Kepulauan Riau | 1971   | Census                              | CBH    |
| Kepulauan Riau | 1972   | Census                              | CBH    |
| Kepulauan Riau | 1973   | Census                              | CBH    |
| Kepulauan Riau | 1974   | Census                              | CBH    |
| Kepulauan Riau | 1975   | Census                              | CBH    |
| Kepulauan Riau | 1976   | Census                              | CBH    |
| Kepulauan Riau | 1977   | Census                              | CBH    |
| Kepulauan Riau | 1978   | Census                              | CBH    |
| Kepulauan Riau | 1979   | Census                              | CBH    |
| Kepulauan Riau | 1980   | Census                              | SBH    |
| Kepulauan Riau | 1980   | Census                              | CBH    |
| Kepulauan Riau | 1981   | Census                              | CBH    |
| Kepulauan Riau | 1982   | Census                              | CBH    |
| Kepulauan Riau | 1983   | Census                              | CBH    |
| Kepulauan Riau | 1984   | Census                              | CBH    |
| Kepulauan Riau | 1985   | Census                              | CBH    |
| Kepulauan Riau | 1986   | Census                              | CBH    |
| Kepulauan Riau | 1987   | Census                              | CBH    |
| Kepulauan Riau | 1988   | Census                              | CBH    |
| Kepulauan Riau | 1989   | Census                              | CBH    |
| Kepulauan Riau | 1990   | Census                              | CBH    |
| Kepulauan Riau | 1990   | Census                              | SBH    |
| Kepulauan Riau | 1991   | Census                              | CBH    |
| Kepulauan Riau | 1992   | Census                              | CBH    |
| Kepulauan Riau | 1993   | Census                              | CBH    |
| Kepulauan Riau | 1994   | Census                              | CBH    |
| Kepulauan Riau | 1995   | Census                              | CBH    |
| Kepulauan Riau | 1996   | Census                              | CBH    |
| Kepulauan Riau | 1997   | Census                              | CBH    |
| Kepulauan Riau | 1998   | Census                              | CBH    |
| Kepulauan Riau | 1999   | Census                              | CBH    |
| Kepulauan Riau | 2000   | Census                              | CBH    |
| Kepulauan Riau | 2000   | Census                              | SBH    |
| Kepulauan Riau | 2002   | Census                              | CBH    |
| Kepulauan Riau | 2004   | Census                              | CBH    |
| Kepulauan Riau | 2010   | Census                              | SBH    |
| Kepulauan Riau | 1981   | Demographic and Health Survey (DHS) | CBH    |
| Kepulauan Riau | 1983   | Demographic and Health Survey (DHS) | CBH    |
| Kepulauan Riau | 1985   | Demographic and Health Survey (DHS) | CBH    |
| Kepulauan Riau | 1987   | Demographic and Health Survey (DHS) | CBH    |
| Kepulauan Riau | 1989   | Demographic and Health Survey (DHS) | CBH    |
| Kepulauan Riau | 1991   | Demographic and Health Survey (DHS) | CBH    |
| Kepulauan Riau | 1993   | Demographic and Health Survey (DHS) | CBH    |
| Kepulauan Riau | 1995   | Demographic and Health Survey (DHS) | CBH    |
| Kepulauan Riau | 1997   | Demographic and Health Survey (DHS) | CBH    |
| Kepulauan Riau | 1999   | Demographic and Health Survey (DHS) | CBH    |
| Kepulauan Riau | 2001   | Demographic and Health Survey (DHS) | CBH    |
| Kepulauan Riau | 2003   | Demographic and Health Survey (DHS) | CBH    |
| Kepulauan Riau | 2005   | Demographic and Health Survey (DHS) | CBH    |
| Kepulauan Riau | 2007   | Demographic and Health Survey (DHS) | SBH    |
| Kepulauan Riau | 2007   | Demographic and Health Survey (DHS) | CBH    |
| Kepulauan Riau | 2009   | Demographic and Health Survey (DHS) | CBH    |
| Kepulauan Riau | 2011   | Demographic and Health Survey (DHS) | CBH    |
| Kepulauan Riau | 2012   | Demographic and Health Survey (DHS) | SBH    |
| Kepulauan Riau | 1985   | Health Survey                       | SBH    |
| Kepulauan Riau | 1992   | Health Survey                       | SBH    |
| Kepulauan Riau | 1993   | Health Survey                       | SBH    |
| Kepulauan Riau | 1994   | Health Survey                       | SBH    |
| Kepulauan Riau | 1995   | Health Survey                       | SBH    |
| Kepulauan Riau | 1996   | Health Survey                       | SBH    |
| Kepulauan Riau | 1998   | Health Survey                       | SBH    |
| Kepulauan Riau | 1999   | Health Survey                       | SBH    |
| Kepulauan Riau | 2000   | Health Survey                       | SBH    |
| Kepulauan Riau | 2001   | Health Survey                       | SBH    |
| Kepulauan Riau | 2003   | Health Survey                       | SBH    |
| Kepulauan Riau | 2004   | Health Survey                       | SBH    |

**Appendix Table 10. Under-5 mortality reference sources by source date and location, 1950-2016**

| Location       | Source | Source years                        | Method |
|----------------|--------|-------------------------------------|--------|
| Kepulauan Riau | 2005   | Health Survey                       | SBH    |
| Kepulauan Riau | 2006   | Health Survey                       | SBH    |
| Kepulauan Riau | 2007   | Health Survey                       | CBH    |
| Kepulauan Riau | 2007   | Health Survey                       | SBH    |
| Kepulauan Riau | 2008   | Health Survey                       | SBH    |
| Kepulauan Riau | 2009   | Health Survey                       | SBH    |
| Kepulauan Riau | 2010   | Health Survey                       | SBH    |
| Kepulauan Riau | 2011   | Health Survey                       | SBH    |
| Kepulauan Riau | 2012   | Health Survey                       | SBH    |
| Kepulauan Riau | 2013   | Health Survey                       | SBH    |
| Lampung        | 1960   | Census                              | CBH    |
| Lampung        | 1961   | Census                              | CBH    |
| Lampung        | 1962   | Census                              | CBH    |
| Lampung        | 1963   | Census                              | CBH    |
| Lampung        | 1964   | Census                              | CBH    |
| Lampung        | 1965   | Census                              | CBH    |
| Lampung        | 1966   | Census                              | CBH    |
| Lampung        | 1967   | Census                              | CBH    |
| Lampung        | 1968   | Census                              | CBH    |
| Lampung        | 1969   | Census                              | CBH    |
| Lampung        | 1970   | Census                              | CBH    |
| Lampung        | 1971   | Census                              | CBH    |
| Lampung        | 1972   | Census                              | CBH    |
| Lampung        | 1973   | Census                              | CBH    |
| Lampung        | 1974   | Census                              | CBH    |
| Lampung        | 1975   | Census                              | CBH    |
| Lampung        | 1976   | Census                              | CBH    |
| Lampung        | 1977   | Census                              | CBH    |
| Lampung        | 1978   | Census                              | CBH    |
| Lampung        | 1979   | Census                              | CBH    |
| Lampung        | 1980   | Census                              | SBH    |
| Lampung        | 1980   | Census                              | CBH    |
| Lampung        | 1981   | Census                              | CBH    |
| Lampung        | 1982   | Census                              | CBH    |
| Lampung        | 1983   | Census                              | CBH    |
| Lampung        | 1984   | Census                              | CBH    |
| Lampung        | 1985   | Census                              | CBH    |
| Lampung        | 1986   | Census                              | CBH    |
| Lampung        | 1987   | Census                              | CBH    |
| Lampung        | 1988   | Census                              | CBH    |
| Lampung        | 1989   | Census                              | CBH    |
| Lampung        | 1990   | Census                              | CBH    |
| Lampung        | 1990   | Census                              | SBH    |
| Lampung        | 1991   | Census                              | CBH    |
| Lampung        | 1992   | Census                              | CBH    |
| Lampung        | 1993   | Census                              | CBH    |
| Lampung        | 1994   | Census                              | CBH    |
| Lampung        | 1995   | Census                              | CBH    |
| Lampung        | 1996   | Census                              | CBH    |
| Lampung        | 1997   | Census                              | CBH    |
| Lampung        | 1998   | Census                              | CBH    |
| Lampung        | 1999   | Census                              | CBH    |
| Lampung        | 2000   | Census                              | CBH    |
| Lampung        | 2000   | Census                              | SBH    |
| Lampung        | 2002   | Census                              | CBH    |
| Lampung        | 2004   | Census                              | CBH    |
| Lampung        | 1969   | Demographic and Health Survey (DHS) | CBH    |
| Lampung        | 1971   | Demographic and Health Survey (DHS) | CBH    |
| Lampung        | 1973   | Demographic and Health Survey (DHS) | CBH    |
| Lampung        | 1975   | Demographic and Health Survey (DHS) | CBH    |
| Lampung        | 1977   | Demographic and Health Survey (DHS) | CBH    |
| Lampung        | 1979   | Demographic and Health Survey (DHS) | CBH    |
| Lampung        | 1981   | Demographic and Health Survey (DHS) | CBH    |
| Lampung        | 1983   | Demographic and Health Survey (DHS) | CBH    |
| Lampung        | 1985   | Demographic and Health Survey (DHS) | CBH    |
| Lampung        | 1987   | Demographic and Health Survey (DHS) | SBH    |
| Lampung        | 1987   | Demographic and Health Survey (DHS) | CBH    |



**Appendix Table 10. Under-5 mortality reference sources by source date and location, 1950-2016**

| Location | Source | Source years                        | Method |
|----------|--------|-------------------------------------|--------|
| Lampung  | 1989   | Demographic and Health Survey (DHS) | CBH    |
| Lampung  | 1991   | Demographic and Health Survey (DHS) | SBH    |
| Lampung  | 1991   | Demographic and Health Survey (DHS) | CBH    |
| Lampung  | 1993   | Demographic and Health Survey (DHS) | CBH    |
| Lampung  | 1994   | Demographic and Health Survey (DHS) | SBH    |
| Lampung  | 1995   | Demographic and Health Survey (DHS) | CBH    |
| Lampung  | 1997   | Demographic and Health Survey (DHS) | SBH    |
| Lampung  | 1997   | Demographic and Health Survey (DHS) | CBH    |
| Lampung  | 1999   | Demographic and Health Survey (DHS) | CBH    |
| Lampung  | 2001   | Demographic and Health Survey (DHS) | CBH    |
| Lampung  | 2003   | Demographic and Health Survey (DHS) | CBH    |
| Lampung  | 2003   | Demographic and Health Survey (DHS) | SBH    |
| Lampung  | 2005   | Demographic and Health Survey (DHS) | CBH    |
| Lampung  | 2007   | Demographic and Health Survey (DHS) | SBH    |
| Lampung  | 2007   | Demographic and Health Survey (DHS) | CBH    |
| Lampung  | 2009   | Demographic and Health Survey (DHS) | CBH    |
| Lampung  | 2011   | Demographic and Health Survey (DHS) | CBH    |
| Lampung  | 2012   | Demographic and Health Survey (DHS) | SBH    |
| Lampung  | 1980   | Health Survey                       | CBH    |
| Lampung  | 1982   | Health Survey                       | CBH    |
| Lampung  | 1984   | Health Survey                       | CBH    |
| Lampung  | 1985   | Health Survey                       | SBH    |
| Lampung  | 1986   | Health Survey                       | CBH    |
| Lampung  | 1988   | Health Survey                       | CBH    |
| Lampung  | 1990   | Health Survey                       | CBH    |
| Lampung  | 1992   | Health Survey                       | SBH    |
| Lampung  | 1992   | Health Survey                       | CBH    |
| Lampung  | 1993   | Health Survey                       | SBH    |
| Lampung  | 1994   | Health Survey                       | CBH    |
| Lampung  | 1994   | Health Survey                       | SBH    |
| Lampung  | 1995   | Health Survey                       | SBH    |
| Lampung  | 1996   | Health Survey                       | CBH    |
| Lampung  | 1996   | Health Survey                       | SBH    |
| Lampung  | 1997   | Health Survey                       | SBH    |
| Lampung  | 1998   | Health Survey                       | SBH    |
| Lampung  | 1998   | Health Survey                       | CBH    |
| Lampung  | 1999   | Health Survey                       | SBH    |
| Lampung  | 2000   | Health Survey                       | CBH    |
| Lampung  | 2000   | Health Survey                       | SBH    |
| Lampung  | 2001   | Health Survey                       | SBH    |
| Lampung  | 2002   | Health Survey                       | SBH    |
| Lampung  | 2003   | Health Survey                       | SBH    |
| Lampung  | 2004   | Health Survey                       | SBH    |
| Lampung  | 2005   | Health Survey                       | SBH    |
| Lampung  | 2006   | Health Survey                       | SBH    |
| Lampung  | 2007   | Health Survey                       | SBH    |
| Lampung  | 2008   | Health Survey                       | SBH    |
| Lampung  | 2009   | Health Survey                       | SBH    |
| Lampung  | 2010   | Health Survey                       | SBH    |
| Lampung  | 2011   | Health Survey                       | SBH    |
| Lampung  | 2012   | Health Survey                       | SBH    |
| Lampung  | 2013   | Health Survey                       | SBH    |
| Maluku   | 1970   | Census                              | CBH    |
| Maluku   | 1971   | Census                              | CBH    |
| Maluku   | 1972   | Census                              | CBH    |
| Maluku   | 1973   | Census                              | CBH    |
| Maluku   | 1974   | Census                              | CBH    |
| Maluku   | 1975   | Census                              | CBH    |
| Maluku   | 1976   | Census                              | CBH    |
| Maluku   | 1977   | Census                              | CBH    |
| Maluku   | 1978   | Census                              | CBH    |
| Maluku   | 1979   | Census                              | CBH    |
| Maluku   | 1980   | Census                              | SBH    |
| Maluku   | 1980   | Census                              | CBH    |
| Maluku   | 1981   | Census                              | CBH    |
| Maluku   | 1982   | Census                              | CBH    |
| Maluku   | 1983   | Census                              | CBH    |

**Appendix Table 10. Under-5 mortality reference sources by source date and location, 1950-2016**

| Location | Source | Source years                        | Method |
|----------|--------|-------------------------------------|--------|
| Maluku   | 1984   | Census                              | CBH    |
| Maluku   | 1985   | Census                              | CBH    |
| Maluku   | 1986   | Census                              | CBH    |
| Maluku   | 1987   | Census                              | CBH    |
| Maluku   | 1988   | Census                              | CBH    |
| Maluku   | 1989   | Census                              | CBH    |
| Maluku   | 1990   | Census                              | SBH    |
| Maluku   | 1990   | Census                              | CBH    |
| Maluku   | 1991   | Census                              | CBH    |
| Maluku   | 1992   | Census                              | CBH    |
| Maluku   | 1993   | Census                              | CBH    |
| Maluku   | 1994   | Census                              | CBH    |
| Maluku   | 1995   | Census                              | CBH    |
| Maluku   | 1996   | Census                              | CBH    |
| Maluku   | 1997   | Census                              | CBH    |
| Maluku   | 1998   | Census                              | CBH    |
| Maluku   | 1999   | Census                              | CBH    |
| Maluku   | 2000   | Census                              | CBH    |
| Maluku   | 2000   | Census                              | SBH    |
| Maluku   | 2002   | Census                              | CBH    |
| Maluku   | 2004   | Census                              | CBH    |
| Maluku   | 2010   | Census                              | SBH    |
| Maluku   | 1991   | Demographic and Health Survey (DHS) | CBH    |
| Maluku   | 1991   | Demographic and Health Survey (DHS) | SBH    |
| Maluku   | 1993   | Demographic and Health Survey (DHS) | CBH    |
| Maluku   | 1994   | Demographic and Health Survey (DHS) | SBH    |
| Maluku   | 1995   | Demographic and Health Survey (DHS) | CBH    |
| Maluku   | 1997   | Demographic and Health Survey (DHS) | SBH    |
| Maluku   | 1997   | Demographic and Health Survey (DHS) | CBH    |
| Maluku   | 1999   | Demographic and Health Survey (DHS) | CBH    |
| Maluku   | 2001   | Demographic and Health Survey (DHS) | CBH    |
| Maluku   | 2003   | Demographic and Health Survey (DHS) | CBH    |
| Maluku   | 2005   | Demographic and Health Survey (DHS) | CBH    |
| Maluku   | 2007   | Demographic and Health Survey (DHS) | CBH    |
| Maluku   | 2007   | Demographic and Health Survey (DHS) | SBH    |
| Maluku   | 2009   | Demographic and Health Survey (DHS) | CBH    |
| Maluku   | 2011   | Demographic and Health Survey (DHS) | CBH    |
| Maluku   | 2012   | Demographic and Health Survey (DHS) | SBH    |
| Maluku   | 1985   | Health Survey                       | SBH    |
| Maluku   | 1992   | Health Survey                       | SBH    |
| Maluku   | 1993   | Health Survey                       | SBH    |
| Maluku   | 1994   | Health Survey                       | SBH    |
| Maluku   | 1995   | Health Survey                       | SBH    |
| Maluku   | 1996   | Health Survey                       | SBH    |
| Maluku   | 1997   | Health Survey                       | CBH    |
| Maluku   | 1998   | Health Survey                       | SBH    |
| Maluku   | 1999   | Health Survey                       | SBH    |
| Maluku   | 1999   | Health Survey                       | CBH    |
| Maluku   | 2001   | Health Survey                       | SBH    |
| Maluku   | 2001   | Health Survey                       | CBH    |
| Maluku   | 2002   | Health Survey                       | SBH    |
| Maluku   | 2003   | Health Survey                       | SBH    |
| Maluku   | 2003   | Health Survey                       | CBH    |
| Maluku   | 2004   | Health Survey                       | SBH    |
| Maluku   | 2005   | Health Survey                       | SBH    |
| Maluku   | 2005   | Health Survey                       | CBH    |
| Maluku   | 2006   | Health Survey                       | SBH    |
| Maluku   | 2007   | Health Survey                       | CBH    |
| Maluku   | 2007   | Health Survey                       | SBH    |
| Maluku   | 2008   | Health Survey                       | SBH    |
| Maluku   | 2009   | Health Survey                       | CBH    |
| Maluku   | 2009   | Health Survey                       | SBH    |
| Maluku   | 2010   | Health Survey                       | SBH    |
| Maluku   | 2011   | Health Survey                       | CBH    |
| Maluku   | 2011   | Health Survey                       | SBH    |
| Maluku   | 2012   | Health Survey                       | SBH    |
| Maluku   | 2013   | Health Survey                       | SBH    |

**Appendix Table 10. Under-5 mortality reference sources by source date and location, 1950-2016**

| Location     | Source | Source years                        | Method |
|--------------|--------|-------------------------------------|--------|
| Maluku Utara | 1970   | Census                              | CBH    |
| Maluku Utara | 1972   | Census                              | CBH    |
| Maluku Utara | 1973   | Census                              | CBH    |
| Maluku Utara | 1974   | Census                              | CBH    |
| Maluku Utara | 1975   | Census                              | CBH    |
| Maluku Utara | 1976   | Census                              | CBH    |
| Maluku Utara | 1977   | Census                              | CBH    |
| Maluku Utara | 1978   | Census                              | CBH    |
| Maluku Utara | 1979   | Census                              | CBH    |
| Maluku Utara | 1980   | Census                              | CBH    |
| Maluku Utara | 1980   | Census                              | SBH    |
| Maluku Utara | 1981   | Census                              | CBH    |
| Maluku Utara | 1982   | Census                              | CBH    |
| Maluku Utara | 1983   | Census                              | CBH    |
| Maluku Utara | 1984   | Census                              | CBH    |
| Maluku Utara | 1985   | Census                              | CBH    |
| Maluku Utara | 1986   | Census                              | CBH    |
| Maluku Utara | 1987   | Census                              | CBH    |
| Maluku Utara | 1988   | Census                              | CBH    |
| Maluku Utara | 1989   | Census                              | CBH    |
| Maluku Utara | 1990   | Census                              | CBH    |
| Maluku Utara | 1990   | Census                              | SBH    |
| Maluku Utara | 1991   | Census                              | CBH    |
| Maluku Utara | 1992   | Census                              | CBH    |
| Maluku Utara | 1993   | Census                              | CBH    |
| Maluku Utara | 1994   | Census                              | CBH    |
| Maluku Utara | 1995   | Census                              | CBH    |
| Maluku Utara | 1996   | Census                              | CBH    |
| Maluku Utara | 1997   | Census                              | CBH    |
| Maluku Utara | 1998   | Census                              | CBH    |
| Maluku Utara | 1999   | Census                              | CBH    |
| Maluku Utara | 2000   | Census                              | CBH    |
| Maluku Utara | 2002   | Census                              | CBH    |
| Maluku Utara | 2004   | Census                              | CBH    |
| Maluku Utara | 2010   | Census                              | SBH    |
| Maluku Utara | 1991   | Demographic and Health Survey (DHS) | SBH    |
| Maluku Utara | 1991   | Demographic and Health Survey (DHS) | CBH    |
| Maluku Utara | 1993   | Demographic and Health Survey (DHS) | CBH    |
| Maluku Utara | 1994   | Demographic and Health Survey (DHS) | SBH    |
| Maluku Utara | 1995   | Demographic and Health Survey (DHS) | CBH    |
| Maluku Utara | 1997   | Demographic and Health Survey (DHS) | CBH    |
| Maluku Utara | 1997   | Demographic and Health Survey (DHS) | SBH    |
| Maluku Utara | 1999   | Demographic and Health Survey (DHS) | CBH    |
| Maluku Utara | 2001   | Demographic and Health Survey (DHS) | CBH    |
| Maluku Utara | 2003   | Demographic and Health Survey (DHS) | CBH    |
| Maluku Utara | 2005   | Demographic and Health Survey (DHS) | CBH    |
| Maluku Utara | 2007   | Demographic and Health Survey (DHS) | SBH    |
| Maluku Utara | 2007   | Demographic and Health Survey (DHS) | CBH    |
| Maluku Utara | 2009   | Demographic and Health Survey (DHS) | CBH    |
| Maluku Utara | 2011   | Demographic and Health Survey (DHS) | CBH    |
| Maluku Utara | 2012   | Demographic and Health Survey (DHS) | SBH    |
| Maluku Utara | 1985   | Health Survey                       | SBH    |
| Maluku Utara | 1995   | Health Survey                       | SBH    |
| Maluku Utara | 1997   | Health Survey                       | CBH    |
| Maluku Utara | 1999   | Health Survey                       | CBH    |
| Maluku Utara | 2001   | Health Survey                       | CBH    |
| Maluku Utara | 2001   | Health Survey                       | SBH    |
| Maluku Utara | 2002   | Health Survey                       | SBH    |
| Maluku Utara | 2003   | Health Survey                       | CBH    |
| Maluku Utara | 2003   | Health Survey                       | SBH    |
| Maluku Utara | 2004   | Health Survey                       | SBH    |
| Maluku Utara | 2005   | Health Survey                       | CBH    |
| Maluku Utara | 2005   | Health Survey                       | SBH    |
| Maluku Utara | 2006   | Health Survey                       | SBH    |
| Maluku Utara | 2007   | Health Survey                       | CBH    |
| Maluku Utara | 2007   | Health Survey                       | SBH    |
| Maluku Utara | 2008   | Health Survey                       | SBH    |

**Appendix Table 10. Under-5 mortality reference sources by source date and location, 1950-2016**

| Location            | Source | Source years                        | Method |
|---------------------|--------|-------------------------------------|--------|
| Maluku Utara        | 2009   | Health Survey                       | CBH    |
| Maluku Utara        | 2009   | Health Survey                       | SBH    |
| Maluku Utara        | 2010   | Health Survey                       | SBH    |
| Maluku Utara        | 2011   | Health Survey                       | SBH    |
| Maluku Utara        | 2011   | Health Survey                       | CBH    |
| Maluku Utara        | 2012   | Health Survey                       | SBH    |
| Maluku Utara        | 2013   | Health Survey                       | SBH    |
| Nusa Tenggara Barat | 1961   | Census                              | CBH    |
| Nusa Tenggara Barat | 1962   | Census                              | CBH    |
| Nusa Tenggara Barat | 1963   | Census                              | CBH    |
| Nusa Tenggara Barat | 1964   | Census                              | CBH    |
| Nusa Tenggara Barat | 1965   | Census                              | CBH    |
| Nusa Tenggara Barat | 1966   | Census                              | CBH    |
| Nusa Tenggara Barat | 1967   | Census                              | CBH    |
| Nusa Tenggara Barat | 1968   | Census                              | CBH    |
| Nusa Tenggara Barat | 1969   | Census                              | CBH    |
| Nusa Tenggara Barat | 1970   | Census                              | CBH    |
| Nusa Tenggara Barat | 1971   | Census                              | CBH    |
| Nusa Tenggara Barat | 1972   | Census                              | CBH    |
| Nusa Tenggara Barat | 1973   | Census                              | CBH    |
| Nusa Tenggara Barat | 1974   | Census                              | CBH    |
| Nusa Tenggara Barat | 1975   | Census                              | CBH    |
| Nusa Tenggara Barat | 1976   | Census                              | CBH    |
| Nusa Tenggara Barat | 1977   | Census                              | CBH    |
| Nusa Tenggara Barat | 1978   | Census                              | CBH    |
| Nusa Tenggara Barat | 1979   | Census                              | CBH    |
| Nusa Tenggara Barat | 1980   | Census                              | CBH    |
| Nusa Tenggara Barat | 1980   | Census                              | SBH    |
| Nusa Tenggara Barat | 1981   | Census                              | CBH    |
| Nusa Tenggara Barat | 1982   | Census                              | CBH    |
| Nusa Tenggara Barat | 1983   | Census                              | CBH    |
| Nusa Tenggara Barat | 1984   | Census                              | CBH    |
| Nusa Tenggara Barat | 1985   | Census                              | CBH    |
| Nusa Tenggara Barat | 1986   | Census                              | CBH    |
| Nusa Tenggara Barat | 1987   | Census                              | CBH    |
| Nusa Tenggara Barat | 1988   | Census                              | CBH    |
| Nusa Tenggara Barat | 1989   | Census                              | CBH    |
| Nusa Tenggara Barat | 1990   | Census                              | CBH    |
| Nusa Tenggara Barat | 1990   | Census                              | SBH    |
| Nusa Tenggara Barat | 1991   | Census                              | CBH    |
| Nusa Tenggara Barat | 1992   | Census                              | CBH    |
| Nusa Tenggara Barat | 1993   | Census                              | CBH    |
| Nusa Tenggara Barat | 1994   | Census                              | CBH    |
| Nusa Tenggara Barat | 1995   | Census                              | CBH    |
| Nusa Tenggara Barat | 1996   | Census                              | CBH    |
| Nusa Tenggara Barat | 1997   | Census                              | CBH    |
| Nusa Tenggara Barat | 1998   | Census                              | CBH    |
| Nusa Tenggara Barat | 1999   | Census                              | CBH    |
| Nusa Tenggara Barat | 2000   | Census                              | SBH    |
| Nusa Tenggara Barat | 2000   | Census                              | CBH    |
| Nusa Tenggara Barat | 2002   | Census                              | CBH    |
| Nusa Tenggara Barat | 2004   | Census                              | CBH    |
| Nusa Tenggara Barat | 2010   | Census                              | SBH    |
| Nusa Tenggara Barat | 1969   | Demographic and Health Survey (DHS) | CBH    |
| Nusa Tenggara Barat | 1971   | Demographic and Health Survey (DHS) | CBH    |
| Nusa Tenggara Barat | 1973   | Demographic and Health Survey (DHS) | CBH    |
| Nusa Tenggara Barat | 1975   | Demographic and Health Survey (DHS) | CBH    |
| Nusa Tenggara Barat | 1977   | Demographic and Health Survey (DHS) | CBH    |
| Nusa Tenggara Barat | 1979   | Demographic and Health Survey (DHS) | CBH    |
| Nusa Tenggara Barat | 1981   | Demographic and Health Survey (DHS) | CBH    |
| Nusa Tenggara Barat | 1983   | Demographic and Health Survey (DHS) | CBH    |
| Nusa Tenggara Barat | 1985   | Demographic and Health Survey (DHS) | CBH    |
| Nusa Tenggara Barat | 1987   | Demographic and Health Survey (DHS) | SBH    |
| Nusa Tenggara Barat | 1987   | Demographic and Health Survey (DHS) | CBH    |
| Nusa Tenggara Barat | 1989   | Demographic and Health Survey (DHS) | CBH    |
| Nusa Tenggara Barat | 1991   | Demographic and Health Survey (DHS) | CBH    |
| Nusa Tenggara Barat | 1991   | Demographic and Health Survey (DHS) | SBH    |

**Appendix Table 10. Under-5 mortality reference sources by source date and location, 1950-2016**

| Location            | Source | Source years                        | Method |
|---------------------|--------|-------------------------------------|--------|
| Nusa Tenggara Barat | 1993   | Demographic and Health Survey (DHS) | CBH    |
| Nusa Tenggara Barat | 1994   | Demographic and Health Survey (DHS) | SBH    |
| Nusa Tenggara Barat | 1995   | Demographic and Health Survey (DHS) | CBH    |
| Nusa Tenggara Barat | 1997   | Demographic and Health Survey (DHS) | SBH    |
| Nusa Tenggara Barat | 1997   | Demographic and Health Survey (DHS) | CBH    |
| Nusa Tenggara Barat | 1999   | Demographic and Health Survey (DHS) | CBH    |
| Nusa Tenggara Barat | 2001   | Demographic and Health Survey (DHS) | CBH    |
| Nusa Tenggara Barat | 2003   | Demographic and Health Survey (DHS) | SBH    |
| Nusa Tenggara Barat | 2003   | Demographic and Health Survey (DHS) | CBH    |
| Nusa Tenggara Barat | 2005   | Demographic and Health Survey (DHS) | CBH    |
| Nusa Tenggara Barat | 2007   | Demographic and Health Survey (DHS) | CBH    |
| Nusa Tenggara Barat | 2007   | Demographic and Health Survey (DHS) | SBH    |
| Nusa Tenggara Barat | 2009   | Demographic and Health Survey (DHS) | CBH    |
| Nusa Tenggara Barat | 2011   | Demographic and Health Survey (DHS) | CBH    |
| Nusa Tenggara Barat | 2012   | Demographic and Health Survey (DHS) | SBH    |
| Nusa Tenggara Barat | 1980   | Health Survey                       | CBH    |
| Nusa Tenggara Barat | 1982   | Health Survey                       | CBH    |
| Nusa Tenggara Barat | 1984   | Health Survey                       | CBH    |
| Nusa Tenggara Barat | 1985   | Health Survey                       | SBH    |
| Nusa Tenggara Barat | 1986   | Health Survey                       | CBH    |
| Nusa Tenggara Barat | 1988   | Health Survey                       | CBH    |
| Nusa Tenggara Barat | 1990   | Health Survey                       | CBH    |
| Nusa Tenggara Barat | 1992   | Health Survey                       | SBH    |
| Nusa Tenggara Barat | 1992   | Health Survey                       | CBH    |
| Nusa Tenggara Barat | 1993   | Health Survey                       | SBH    |
| Nusa Tenggara Barat | 1994   | Health Survey                       | SBH    |
| Nusa Tenggara Barat | 1994   | Health Survey                       | CBH    |
| Nusa Tenggara Barat | 1995   | Health Survey                       | SBH    |
| Nusa Tenggara Barat | 1996   | Health Survey                       | SBH    |
| Nusa Tenggara Barat | 1996   | Health Survey                       | CBH    |
| Nusa Tenggara Barat | 1997   | Health Survey                       | SBH    |
| Nusa Tenggara Barat | 1998   | Health Survey                       | CBH    |
| Nusa Tenggara Barat | 1998   | Health Survey                       | SBH    |
| Nusa Tenggara Barat | 1999   | Health Survey                       | SBH    |
| Nusa Tenggara Barat | 2000   | Health Survey                       | SBH    |
| Nusa Tenggara Barat | 2000   | Health Survey                       | CBH    |
| Nusa Tenggara Barat | 2001   | Health Survey                       | SBH    |
| Nusa Tenggara Barat | 2002   | Health Survey                       | SBH    |
| Nusa Tenggara Barat | 2003   | Health Survey                       | SBH    |
| Nusa Tenggara Barat | 2004   | Health Survey                       | SBH    |
| Nusa Tenggara Barat | 2005   | Health Survey                       | SBH    |
| Nusa Tenggara Barat | 2006   | Health Survey                       | SBH    |
| Nusa Tenggara Barat | 2007   | Health Survey                       | SBH    |
| Nusa Tenggara Barat | 2008   | Health Survey                       | SBH    |
| Nusa Tenggara Barat | 2009   | Health Survey                       | SBH    |
| Nusa Tenggara Barat | 2010   | Health Survey                       | SBH    |
| Nusa Tenggara Barat | 2011   | Health Survey                       | SBH    |
| Nusa Tenggara Barat | 2012   | Health Survey                       | SBH    |
| Nusa Tenggara Barat | 2013   | Health Survey                       | SBH    |
| Nusa Tenggara Timur | 1957   | Census                              | CBH    |
| Nusa Tenggara Timur | 1958   | Census                              | CBH    |
| Nusa Tenggara Timur | 1959   | Census                              | CBH    |
| Nusa Tenggara Timur | 1960   | Census                              | CBH    |
| Nusa Tenggara Timur | 1961   | Census                              | CBH    |
| Nusa Tenggara Timur | 1962   | Census                              | CBH    |
| Nusa Tenggara Timur | 1963   | Census                              | CBH    |
| Nusa Tenggara Timur | 1964   | Census                              | CBH    |
| Nusa Tenggara Timur | 1965   | Census                              | CBH    |
| Nusa Tenggara Timur | 1966   | Census                              | CBH    |
| Nusa Tenggara Timur | 1967   | Census                              | CBH    |
| Nusa Tenggara Timur | 1968   | Census                              | CBH    |
| Nusa Tenggara Timur | 1969   | Census                              | CBH    |
| Nusa Tenggara Timur | 1970   | Census                              | CBH    |
| Nusa Tenggara Timur | 1971   | Census                              | CBH    |
| Nusa Tenggara Timur | 1972   | Census                              | CBH    |
| Nusa Tenggara Timur | 1973   | Census                              | CBH    |
| Nusa Tenggara Timur | 1974   | Census                              | CBH    |

**Appendix Table 10. Under-5 mortality reference sources by source date and location, 1950-2016**

| Location            | Source | Source years                        | Method |
|---------------------|--------|-------------------------------------|--------|
| Nusa Tenggara Timur | 1975   | Census                              | CBH    |
| Nusa Tenggara Timur | 1976   | Census                              | CBH    |
| Nusa Tenggara Timur | 1977   | Census                              | CBH    |
| Nusa Tenggara Timur | 1978   | Census                              | CBH    |
| Nusa Tenggara Timur | 1979   | Census                              | CBH    |
| Nusa Tenggara Timur | 1980   | Census                              | SBH    |
| Nusa Tenggara Timur | 1980   | Census                              | CBH    |
| Nusa Tenggara Timur | 1981   | Census                              | CBH    |
| Nusa Tenggara Timur | 1982   | Census                              | CBH    |
| Nusa Tenggara Timur | 1983   | Census                              | CBH    |
| Nusa Tenggara Timur | 1984   | Census                              | CBH    |
| Nusa Tenggara Timur | 1985   | Census                              | CBH    |
| Nusa Tenggara Timur | 1986   | Census                              | CBH    |
| Nusa Tenggara Timur | 1987   | Census                              | CBH    |
| Nusa Tenggara Timur | 1988   | Census                              | CBH    |
| Nusa Tenggara Timur | 1989   | Census                              | CBH    |
| Nusa Tenggara Timur | 1990   | Census                              | SBH    |
| Nusa Tenggara Timur | 1990   | Census                              | CBH    |
| Nusa Tenggara Timur | 1991   | Census                              | CBH    |
| Nusa Tenggara Timur | 1992   | Census                              | CBH    |
| Nusa Tenggara Timur | 1993   | Census                              | CBH    |
| Nusa Tenggara Timur | 1994   | Census                              | CBH    |
| Nusa Tenggara Timur | 1995   | Census                              | CBH    |
| Nusa Tenggara Timur | 1996   | Census                              | CBH    |
| Nusa Tenggara Timur | 1997   | Census                              | CBH    |
| Nusa Tenggara Timur | 1998   | Census                              | CBH    |
| Nusa Tenggara Timur | 1999   | Census                              | CBH    |
| Nusa Tenggara Timur | 2000   | Census                              | SBH    |
| Nusa Tenggara Timur | 2000   | Census                              | CBH    |
| Nusa Tenggara Timur | 2002   | Census                              | CBH    |
| Nusa Tenggara Timur | 2004   | Census                              | CBH    |
| Nusa Tenggara Timur | 2010   | Census                              | SBH    |
| Nusa Tenggara Timur | 1973   | Demographic and Health Survey (DHS) | CBH    |
| Nusa Tenggara Timur | 1975   | Demographic and Health Survey (DHS) | CBH    |
| Nusa Tenggara Timur | 1977   | Demographic and Health Survey (DHS) | CBH    |
| Nusa Tenggara Timur | 1979   | Demographic and Health Survey (DHS) | CBH    |
| Nusa Tenggara Timur | 1981   | Demographic and Health Survey (DHS) | CBH    |
| Nusa Tenggara Timur | 1983   | Demographic and Health Survey (DHS) | CBH    |
| Nusa Tenggara Timur | 1985   | Demographic and Health Survey (DHS) | CBH    |
| Nusa Tenggara Timur | 1987   | Demographic and Health Survey (DHS) | CBH    |
| Nusa Tenggara Timur | 1989   | Demographic and Health Survey (DHS) | CBH    |
| Nusa Tenggara Timur | 1991   | Demographic and Health Survey (DHS) | SBH    |
| Nusa Tenggara Timur | 1991   | Demographic and Health Survey (DHS) | CBH    |
| Nusa Tenggara Timur | 1993   | Demographic and Health Survey (DHS) | CBH    |
| Nusa Tenggara Timur | 1994   | Demographic and Health Survey (DHS) | SBH    |
| Nusa Tenggara Timur | 1995   | Demographic and Health Survey (DHS) | CBH    |
| Nusa Tenggara Timur | 1997   | Demographic and Health Survey (DHS) | SBH    |
| Nusa Tenggara Timur | 1997   | Demographic and Health Survey (DHS) | CBH    |
| Nusa Tenggara Timur | 1999   | Demographic and Health Survey (DHS) | CBH    |
| Nusa Tenggara Timur | 2001   | Demographic and Health Survey (DHS) | CBH    |
| Nusa Tenggara Timur | 2003   | Demographic and Health Survey (DHS) | SBH    |
| Nusa Tenggara Timur | 2003   | Demographic and Health Survey (DHS) | CBH    |
| Nusa Tenggara Timur | 2005   | Demographic and Health Survey (DHS) | CBH    |
| Nusa Tenggara Timur | 2007   | Demographic and Health Survey (DHS) | SBH    |
| Nusa Tenggara Timur | 2007   | Demographic and Health Survey (DHS) | CBH    |
| Nusa Tenggara Timur | 2009   | Demographic and Health Survey (DHS) | CBH    |
| Nusa Tenggara Timur | 2011   | Demographic and Health Survey (DHS) | CBH    |
| Nusa Tenggara Timur | 2012   | Demographic and Health Survey (DHS) | SBH    |
| Nusa Tenggara Timur | 1985   | Health Survey                       | SBH    |
| Nusa Tenggara Timur | 1992   | Health Survey                       | SBH    |
| Nusa Tenggara Timur | 1993   | Health Survey                       | SBH    |
| Nusa Tenggara Timur | 1994   | Health Survey                       | SBH    |
| Nusa Tenggara Timur | 1995   | Health Survey                       | SBH    |
| Nusa Tenggara Timur | 1996   | Health Survey                       | SBH    |
| Nusa Tenggara Timur | 1997   | Health Survey                       | CBH    |
| Nusa Tenggara Timur | 1998   | Health Survey                       | SBH    |
| Nusa Tenggara Timur | 1999   | Health Survey                       | SBH    |

**Appendix Table 10. Under-5 mortality reference sources by source date and location, 1950-2016**

| Location            | Source | Source years                        | Method |
|---------------------|--------|-------------------------------------|--------|
| Nusa Tenggara Timur | 1999   | Health Survey                       | CBH    |
| Nusa Tenggara Timur | 2000   | Health Survey                       | SBH    |
| Nusa Tenggara Timur | 2001   | Health Survey                       | SBH    |
| Nusa Tenggara Timur | 2001   | Health Survey                       | CBH    |
| Nusa Tenggara Timur | 2002   | Health Survey                       | SBH    |
| Nusa Tenggara Timur | 2003   | Health Survey                       | SBH    |
| Nusa Tenggara Timur | 2003   | Health Survey                       | CBH    |
| Nusa Tenggara Timur | 2004   | Health Survey                       | SBH    |
| Nusa Tenggara Timur | 2005   | Health Survey                       | CBH    |
| Nusa Tenggara Timur | 2005   | Health Survey                       | SBH    |
| Nusa Tenggara Timur | 2006   | Health Survey                       | SBH    |
| Nusa Tenggara Timur | 2007   | Health Survey                       | SBH    |
| Nusa Tenggara Timur | 2007   | Health Survey                       | CBH    |
| Nusa Tenggara Timur | 2008   | Health Survey                       | SBH    |
| Nusa Tenggara Timur | 2009   | Health Survey                       | CBH    |
| Nusa Tenggara Timur | 2009   | Health Survey                       | SBH    |
| Nusa Tenggara Timur | 2010   | Health Survey                       | SBH    |
| Nusa Tenggara Timur | 2011   | Health Survey                       | CBH    |
| Nusa Tenggara Timur | 2011   | Health Survey                       | SBH    |
| Nusa Tenggara Timur | 2012   | Health Survey                       | SBH    |
| Nusa Tenggara Timur | 2013   | Health Survey                       | SBH    |
| Papua               | 1970   | Census                              | CBH    |
| Papua               | 1972   | Census                              | CBH    |
| Papua               | 1974   | Census                              | CBH    |
| Papua               | 1975   | Census                              | CBH    |
| Papua               | 1976   | Census                              | CBH    |
| Papua               | 1977   | Census                              | CBH    |
| Papua               | 1978   | Census                              | CBH    |
| Papua               | 1979   | Census                              | CBH    |
| Papua               | 1980   | Census                              | CBH    |
| Papua               | 1980   | Census                              | SBH    |
| Papua               | 1981   | Census                              | CBH    |
| Papua               | 1982   | Census                              | CBH    |
| Papua               | 1983   | Census                              | CBH    |
| Papua               | 1984   | Census                              | CBH    |
| Papua               | 1985   | Census                              | CBH    |
| Papua               | 1986   | Census                              | CBH    |
| Papua               | 1987   | Census                              | CBH    |
| Papua               | 1988   | Census                              | CBH    |
| Papua               | 1989   | Census                              | CBH    |
| Papua               | 1990   | Census                              | CBH    |
| Papua               | 1991   | Census                              | CBH    |
| Papua               | 1992   | Census                              | CBH    |
| Papua               | 1993   | Census                              | CBH    |
| Papua               | 1994   | Census                              | CBH    |
| Papua               | 1995   | Census                              | CBH    |
| Papua               | 1996   | Census                              | CBH    |
| Papua               | 1997   | Census                              | CBH    |
| Papua               | 1998   | Census                              | CBH    |
| Papua               | 1999   | Census                              | CBH    |
| Papua               | 2000   | Census                              | CBH    |
| Papua               | 2000   | Census                              | SBH    |
| Papua               | 2002   | Census                              | CBH    |
| Papua               | 2004   | Census                              | CBH    |
| Papua               | 2010   | Census                              | SBH    |
| Papua               | 1993   | Demographic and Health Survey (DHS) | CBH    |
| Papua               | 1995   | Demographic and Health Survey (DHS) | CBH    |
| Papua               | 1997   | Demographic and Health Survey (DHS) | CBH    |
| Papua               | 1999   | Demographic and Health Survey (DHS) | CBH    |
| Papua               | 2001   | Demographic and Health Survey (DHS) | CBH    |
| Papua               | 2003   | Demographic and Health Survey (DHS) | CBH    |
| Papua               | 2005   | Demographic and Health Survey (DHS) | CBH    |
| Papua               | 2007   | Demographic and Health Survey (DHS) | SBH    |
| Papua               | 2007   | Demographic and Health Survey (DHS) | CBH    |
| Papua               | 2009   | Demographic and Health Survey (DHS) | CBH    |
| Papua               | 2011   | Demographic and Health Survey (DHS) | CBH    |
| Papua               | 2012   | Demographic and Health Survey (DHS) | SBH    |

**Appendix Table 10. Under-5 mortality reference sources by source date and location, 1950-2016**

| Location    | Source | Source years                        | Method |
|-------------|--------|-------------------------------------|--------|
| Papua       | 1985   | Health Survey                       | SBH    |
| Papua       | 1992   | Health Survey                       | SBH    |
| Papua       | 1993   | Health Survey                       | SBH    |
| Papua       | 1994   | Health Survey                       | SBH    |
| Papua       | 1995   | Health Survey                       | SBH    |
| Papua       | 1996   | Health Survey                       | SBH    |
| Papua       | 1997   | Health Survey                       | CBH    |
| Papua       | 1998   | Health Survey                       | SBH    |
| Papua       | 1999   | Health Survey                       | SBH    |
| Papua       | 1999   | Health Survey                       | CBH    |
| Papua       | 2000   | Health Survey                       | SBH    |
| Papua       | 2001   | Health Survey                       | CBH    |
| Papua       | 2001   | Health Survey                       | SBH    |
| Papua       | 2003   | Health Survey                       | SBH    |
| Papua       | 2003   | Health Survey                       | CBH    |
| Papua       | 2004   | Health Survey                       | SBH    |
| Papua       | 2005   | Health Survey                       | CBH    |
| Papua       | 2005   | Health Survey                       | SBH    |
| Papua       | 2006   | Health Survey                       | SBH    |
| Papua       | 2007   | Health Survey                       | CBH    |
| Papua       | 2007   | Health Survey                       | SBH    |
| Papua       | 2008   | Health Survey                       | SBH    |
| Papua       | 2009   | Health Survey                       | SBH    |
| Papua       | 2009   | Health Survey                       | CBH    |
| Papua       | 2010   | Health Survey                       | SBH    |
| Papua       | 2011   | Health Survey                       | SBH    |
| Papua       | 2011   | Health Survey                       | CBH    |
| Papua       | 2012   | Health Survey                       | SBH    |
| Papua       | 2013   | Health Survey                       | SBH    |
| Papua Barat | 1973   | Census                              | CBH    |
| Papua Barat | 1975   | Census                              | CBH    |
| Papua Barat | 1976   | Census                              | CBH    |
| Papua Barat | 1977   | Census                              | CBH    |
| Papua Barat | 1978   | Census                              | CBH    |
| Papua Barat | 1979   | Census                              | CBH    |
| Papua Barat | 1980   | Census                              | CBH    |
| Papua Barat | 1980   | Census                              | SBH    |
| Papua Barat | 1981   | Census                              | CBH    |
| Papua Barat | 1982   | Census                              | CBH    |
| Papua Barat | 1983   | Census                              | CBH    |
| Papua Barat | 1984   | Census                              | CBH    |
| Papua Barat | 1985   | Census                              | CBH    |
| Papua Barat | 1986   | Census                              | CBH    |
| Papua Barat | 1987   | Census                              | CBH    |
| Papua Barat | 1988   | Census                              | CBH    |
| Papua Barat | 1989   | Census                              | CBH    |
| Papua Barat | 1990   | Census                              | CBH    |
| Papua Barat | 1991   | Census                              | CBH    |
| Papua Barat | 1992   | Census                              | CBH    |
| Papua Barat | 1993   | Census                              | CBH    |
| Papua Barat | 1994   | Census                              | CBH    |
| Papua Barat | 1995   | Census                              | CBH    |
| Papua Barat | 1996   | Census                              | CBH    |
| Papua Barat | 1997   | Census                              | CBH    |
| Papua Barat | 1998   | Census                              | CBH    |
| Papua Barat | 1999   | Census                              | CBH    |
| Papua Barat | 2000   | Census                              | SBH    |
| Papua Barat | 2000   | Census                              | CBH    |
| Papua Barat | 2002   | Census                              | CBH    |
| Papua Barat | 2004   | Census                              | CBH    |
| Papua Barat | 2010   | Census                              | SBH    |
| Papua Barat | 1991   | Demographic and Health Survey (DHS) | CBH    |
| Papua Barat | 1993   | Demographic and Health Survey (DHS) | CBH    |
| Papua Barat | 1995   | Demographic and Health Survey (DHS) | CBH    |
| Papua Barat | 1997   | Demographic and Health Survey (DHS) | CBH    |
| Papua Barat | 1999   | Demographic and Health Survey (DHS) | CBH    |
| Papua Barat | 2001   | Demographic and Health Survey (DHS) | CBH    |



**Appendix Table 10. Under-5 mortality reference sources by source date and location, 1950-2016**

| Location    | Source | Source years                        | Method |
|-------------|--------|-------------------------------------|--------|
| Papua Barat | 2003   | Demographic and Health Survey (DHS) | CBH    |
| Papua Barat | 2005   | Demographic and Health Survey (DHS) | CBH    |
| Papua Barat | 2007   | Demographic and Health Survey (DHS) | CBH    |
| Papua Barat | 2007   | Demographic and Health Survey (DHS) | SBH    |
| Papua Barat | 2009   | Demographic and Health Survey (DHS) | CBH    |
| Papua Barat | 2011   | Demographic and Health Survey (DHS) | CBH    |
| Papua Barat | 2012   | Demographic and Health Survey (DHS) | SBH    |
| Papua Barat | 1985   | Health Survey                       | SBH    |
| Papua Barat | 1992   | Health Survey                       | SBH    |
| Papua Barat | 1993   | Health Survey                       | SBH    |
| Papua Barat | 1994   | Health Survey                       | SBH    |
| Papua Barat | 1995   | Health Survey                       | SBH    |
| Papua Barat | 1996   | Health Survey                       | SBH    |
| Papua Barat | 1997   | Health Survey                       | CBH    |
| Papua Barat | 1998   | Health Survey                       | SBH    |
| Papua Barat | 1999   | Health Survey                       | SBH    |
| Papua Barat | 1999   | Health Survey                       | CBH    |
| Papua Barat | 2000   | Health Survey                       | SBH    |
| Papua Barat | 2001   | Health Survey                       | CBH    |
| Papua Barat | 2001   | Health Survey                       | SBH    |
| Papua Barat | 2003   | Health Survey                       | CBH    |
| Papua Barat | 2003   | Health Survey                       | SBH    |
| Papua Barat | 2004   | Health Survey                       | SBH    |
| Papua Barat | 2005   | Health Survey                       | CBH    |
| Papua Barat | 2005   | Health Survey                       | SBH    |
| Papua Barat | 2006   | Health Survey                       | SBH    |
| Papua Barat | 2007   | Health Survey                       | CBH    |
| Papua Barat | 2007   | Health Survey                       | SBH    |
| Papua Barat | 2008   | Health Survey                       | SBH    |
| Papua Barat | 2009   | Health Survey                       | SBH    |
| Papua Barat | 2009   | Health Survey                       | CBH    |
| Papua Barat | 2010   | Health Survey                       | SBH    |
| Papua Barat | 2011   | Health Survey                       | CBH    |
| Papua Barat | 2011   | Health Survey                       | SBH    |
| Papua Barat | 2012   | Health Survey                       | SBH    |
| Papua Barat | 2013   | Health Survey                       | SBH    |
| Riau        | 1964   | Census                              | CBH    |
| Riau        | 1965   | Census                              | CBH    |
| Riau        | 1966   | Census                              | CBH    |
| Riau        | 1967   | Census                              | CBH    |
| Riau        | 1968   | Census                              | CBH    |
| Riau        | 1969   | Census                              | CBH    |
| Riau        | 1970   | Census                              | CBH    |
| Riau        | 1971   | Census                              | CBH    |
| Riau        | 1972   | Census                              | CBH    |
| Riau        | 1973   | Census                              | CBH    |
| Riau        | 1974   | Census                              | CBH    |
| Riau        | 1975   | Census                              | CBH    |
| Riau        | 1976   | Census                              | CBH    |
| Riau        | 1977   | Census                              | CBH    |
| Riau        | 1978   | Census                              | CBH    |
| Riau        | 1979   | Census                              | CBH    |
| Riau        | 1980   | Census                              | CBH    |
| Riau        | 1980   | Census                              | SBH    |
| Riau        | 1981   | Census                              | CBH    |
| Riau        | 1982   | Census                              | CBH    |
| Riau        | 1983   | Census                              | CBH    |
| Riau        | 1984   | Census                              | CBH    |
| Riau        | 1985   | Census                              | CBH    |
| Riau        | 1986   | Census                              | CBH    |
| Riau        | 1987   | Census                              | CBH    |
| Riau        | 1988   | Census                              | CBH    |
| Riau        | 1989   | Census                              | CBH    |
| Riau        | 1990   | Census                              | CBH    |
| Riau        | 1990   | Census                              | SBH    |
| Riau        | 1991   | Census                              | CBH    |
| Riau        | 1992   | Census                              | CBH    |

**Appendix Table 10. Under-5 mortality reference sources by source date and location, 1950-2016**

| Location | Source | Source years                        | Method |
|----------|--------|-------------------------------------|--------|
| Riau     | 1993   | Census                              | CBH    |
| Riau     | 1994   | Census                              | CBH    |
| Riau     | 1995   | Census                              | CBH    |
| Riau     | 1996   | Census                              | CBH    |
| Riau     | 1997   | Census                              | CBH    |
| Riau     | 1998   | Census                              | CBH    |
| Riau     | 1999   | Census                              | CBH    |
| Riau     | 2000   | Census                              | CBH    |
| Riau     | 2000   | Census                              | SBH    |
| Riau     | 2002   | Census                              | CBH    |
| Riau     | 2004   | Census                              | CBH    |
| Riau     | 2010   | Census                              | SBH    |
| Riau     | 1969   | Demographic and Health Survey (DHS) | CBH    |
| Riau     | 1971   | Demographic and Health Survey (DHS) | CBH    |
| Riau     | 1973   | Demographic and Health Survey (DHS) | CBH    |
| Riau     | 1975   | Demographic and Health Survey (DHS) | CBH    |
| Riau     | 1977   | Demographic and Health Survey (DHS) | CBH    |
| Riau     | 1979   | Demographic and Health Survey (DHS) | CBH    |
| Riau     | 1981   | Demographic and Health Survey (DHS) | CBH    |
| Riau     | 1983   | Demographic and Health Survey (DHS) | CBH    |
| Riau     | 1985   | Demographic and Health Survey (DHS) | CBH    |
| Riau     | 1987   | Demographic and Health Survey (DHS) | CBH    |
| Riau     | 1987   | Demographic and Health Survey (DHS) | SBH    |
| Riau     | 1989   | Demographic and Health Survey (DHS) | CBH    |
| Riau     | 1991   | Demographic and Health Survey (DHS) | CBH    |
| Riau     | 1991   | Demographic and Health Survey (DHS) | SBH    |
| Riau     | 1993   | Demographic and Health Survey (DHS) | CBH    |
| Riau     | 1994   | Demographic and Health Survey (DHS) | SBH    |
| Riau     | 1995   | Demographic and Health Survey (DHS) | CBH    |
| Riau     | 1997   | Demographic and Health Survey (DHS) | SBH    |
| Riau     | 1997   | Demographic and Health Survey (DHS) | CBH    |
| Riau     | 1999   | Demographic and Health Survey (DHS) | CBH    |
| Riau     | 2001   | Demographic and Health Survey (DHS) | CBH    |
| Riau     | 2003   | Demographic and Health Survey (DHS) | SBH    |
| Riau     | 2003   | Demographic and Health Survey (DHS) | CBH    |
| Riau     | 2005   | Demographic and Health Survey (DHS) | CBH    |
| Riau     | 2007   | Demographic and Health Survey (DHS) | SBH    |
| Riau     | 2007   | Demographic and Health Survey (DHS) | CBH    |
| Riau     | 2009   | Demographic and Health Survey (DHS) | CBH    |
| Riau     | 2011   | Demographic and Health Survey (DHS) | CBH    |
| Riau     | 2012   | Demographic and Health Survey (DHS) | SBH    |
| Riau     | 1985   | Health Survey                       | SBH    |
| Riau     | 1992   | Health Survey                       | CBH    |
| Riau     | 1992   | Health Survey                       | SBH    |
| Riau     | 1993   | Health Survey                       | SBH    |
| Riau     | 1994   | Health Survey                       | CBH    |
| Riau     | 1994   | Health Survey                       | SBH    |
| Riau     | 1995   | Health Survey                       | SBH    |
| Riau     | 1996   | Health Survey                       | SBH    |
| Riau     | 1996   | Health Survey                       | CBH    |
| Riau     | 1998   | Health Survey                       | CBH    |
| Riau     | 1998   | Health Survey                       | SBH    |
| Riau     | 1999   | Health Survey                       | SBH    |
| Riau     | 2000   | Health Survey                       | CBH    |
| Riau     | 2000   | Health Survey                       | SBH    |
| Riau     | 2001   | Health Survey                       | SBH    |
| Riau     | 2002   | Health Survey                       | SBH    |
| Riau     | 2003   | Health Survey                       | SBH    |
| Riau     | 2004   | Health Survey                       | SBH    |
| Riau     | 2005   | Health Survey                       | SBH    |
| Riau     | 2006   | Health Survey                       | SBH    |
| Riau     | 2007   | Health Survey                       | SBH    |
| Riau     | 2008   | Health Survey                       | SBH    |
| Riau     | 2009   | Health Survey                       | SBH    |
| Riau     | 2010   | Health Survey                       | SBH    |
| Riau     | 2011   | Health Survey                       | SBH    |
| Riau     | 2012   | Health Survey                       | SBH    |

**Appendix Table 10. Under-5 mortality reference sources by source date and location, 1950-2016**

| Location       | Source | Source years                        | Method |
|----------------|--------|-------------------------------------|--------|
| Riau           | 2013   | Health Survey                       | SBH    |
| Sulawesi Barat | 1966   | Census                              | CBH    |
| Sulawesi Barat | 1967   | Census                              | CBH    |
| Sulawesi Barat | 1968   | Census                              | CBH    |
| Sulawesi Barat | 1969   | Census                              | CBH    |
| Sulawesi Barat | 1970   | Census                              | CBH    |
| Sulawesi Barat | 1971   | Census                              | CBH    |
| Sulawesi Barat | 1972   | Census                              | CBH    |
| Sulawesi Barat | 1973   | Census                              | CBH    |
| Sulawesi Barat | 1974   | Census                              | CBH    |
| Sulawesi Barat | 1975   | Census                              | CBH    |
| Sulawesi Barat | 1976   | Census                              | CBH    |
| Sulawesi Barat | 1977   | Census                              | CBH    |
| Sulawesi Barat | 1978   | Census                              | CBH    |
| Sulawesi Barat | 1979   | Census                              | CBH    |
| Sulawesi Barat | 1980   | Census                              | SBH    |
| Sulawesi Barat | 1980   | Census                              | CBH    |
| Sulawesi Barat | 1981   | Census                              | CBH    |
| Sulawesi Barat | 1982   | Census                              | CBH    |
| Sulawesi Barat | 1983   | Census                              | CBH    |
| Sulawesi Barat | 1984   | Census                              | CBH    |
| Sulawesi Barat | 1985   | Census                              | CBH    |
| Sulawesi Barat | 1986   | Census                              | CBH    |
| Sulawesi Barat | 1987   | Census                              | CBH    |
| Sulawesi Barat | 1988   | Census                              | CBH    |
| Sulawesi Barat | 1989   | Census                              | CBH    |
| Sulawesi Barat | 1990   | Census                              | CBH    |
| Sulawesi Barat | 1990   | Census                              | SBH    |
| Sulawesi Barat | 1991   | Census                              | CBH    |
| Sulawesi Barat | 1992   | Census                              | CBH    |
| Sulawesi Barat | 1993   | Census                              | CBH    |
| Sulawesi Barat | 1994   | Census                              | CBH    |
| Sulawesi Barat | 1995   | Census                              | CBH    |
| Sulawesi Barat | 1996   | Census                              | CBH    |
| Sulawesi Barat | 1997   | Census                              | CBH    |
| Sulawesi Barat | 1998   | Census                              | CBH    |
| Sulawesi Barat | 1999   | Census                              | CBH    |
| Sulawesi Barat | 2000   | Census                              | CBH    |
| Sulawesi Barat | 2000   | Census                              | SBH    |
| Sulawesi Barat | 2002   | Census                              | CBH    |
| Sulawesi Barat | 2004   | Census                              | CBH    |
| Sulawesi Barat | 2010   | Census                              | SBH    |
| Sulawesi Barat | 1983   | Demographic and Health Survey (DHS) | CBH    |
| Sulawesi Barat | 1985   | Demographic and Health Survey (DHS) | CBH    |
| Sulawesi Barat | 1987   | Demographic and Health Survey (DHS) | CBH    |
| Sulawesi Barat | 1989   | Demographic and Health Survey (DHS) | CBH    |
| Sulawesi Barat | 1991   | Demographic and Health Survey (DHS) | CBH    |
| Sulawesi Barat | 1993   | Demographic and Health Survey (DHS) | CBH    |
| Sulawesi Barat | 1995   | Demographic and Health Survey (DHS) | CBH    |
| Sulawesi Barat | 1997   | Demographic and Health Survey (DHS) | CBH    |
| Sulawesi Barat | 1999   | Demographic and Health Survey (DHS) | CBH    |
| Sulawesi Barat | 2001   | Demographic and Health Survey (DHS) | CBH    |
| Sulawesi Barat | 2003   | Demographic and Health Survey (DHS) | CBH    |
| Sulawesi Barat | 2005   | Demographic and Health Survey (DHS) | CBH    |
| Sulawesi Barat | 2007   | Demographic and Health Survey (DHS) | SBH    |
| Sulawesi Barat | 2007   | Demographic and Health Survey (DHS) | CBH    |
| Sulawesi Barat | 2009   | Demographic and Health Survey (DHS) | CBH    |
| Sulawesi Barat | 2011   | Demographic and Health Survey (DHS) | CBH    |
| Sulawesi Barat | 2012   | Demographic and Health Survey (DHS) | SBH    |
| Sulawesi Barat | 1984   | Health Survey                       | CBH    |
| Sulawesi Barat | 1985   | Health Survey                       | SBH    |
| Sulawesi Barat | 1986   | Health Survey                       | CBH    |
| Sulawesi Barat | 1988   | Health Survey                       | CBH    |
| Sulawesi Barat | 1990   | Health Survey                       | CBH    |
| Sulawesi Barat | 1992   | Health Survey                       | SBH    |
| Sulawesi Barat | 1992   | Health Survey                       | CBH    |
| Sulawesi Barat | 1993   | Health Survey                       | SBH    |

**Appendix Table 10. Under-5 mortality reference sources by source date and location, 1950-2016**

| Location         | Source | Source years  | Method |
|------------------|--------|---------------|--------|
| Sulawesi Barat   | 1994   | Health Survey | CBH    |
| Sulawesi Barat   | 1994   | Health Survey | SBH    |
| Sulawesi Barat   | 1995   | Health Survey | SBH    |
| Sulawesi Barat   | 1996   | Health Survey | SBH    |
| Sulawesi Barat   | 1996   | Health Survey | CBH    |
| Sulawesi Barat   | 1998   | Health Survey | SBH    |
| Sulawesi Barat   | 1998   | Health Survey | CBH    |
| Sulawesi Barat   | 1999   | Health Survey | SBH    |
| Sulawesi Barat   | 2000   | Health Survey | SBH    |
| Sulawesi Barat   | 2001   | Health Survey | SBH    |
| Sulawesi Barat   | 2003   | Health Survey | SBH    |
| Sulawesi Barat   | 2004   | Health Survey | SBH    |
| Sulawesi Barat   | 2005   | Health Survey | SBH    |
| Sulawesi Barat   | 2006   | Health Survey | SBH    |
| Sulawesi Barat   | 2007   | Health Survey | SBH    |
| Sulawesi Barat   | 2008   | Health Survey | SBH    |
| Sulawesi Barat   | 2009   | Health Survey | SBH    |
| Sulawesi Barat   | 2010   | Health Survey | SBH    |
| Sulawesi Barat   | 2011   | Health Survey | SBH    |
| Sulawesi Barat   | 2012   | Health Survey | SBH    |
| Sulawesi Barat   | 2013   | Health Survey | SBH    |
| Sulawesi Selatan | 1949   | Census        | CBH    |
| Sulawesi Selatan | 1951   | Census        | CBH    |
| Sulawesi Selatan | 1952   | Census        | CBH    |
| Sulawesi Selatan | 1953   | Census        | CBH    |
| Sulawesi Selatan | 1954   | Census        | CBH    |
| Sulawesi Selatan | 1955   | Census        | CBH    |
| Sulawesi Selatan | 1956   | Census        | CBH    |
| Sulawesi Selatan | 1957   | Census        | CBH    |
| Sulawesi Selatan | 1958   | Census        | CBH    |
| Sulawesi Selatan | 1959   | Census        | CBH    |
| Sulawesi Selatan | 1960   | Census        | CBH    |
| Sulawesi Selatan | 1961   | Census        | CBH    |
| Sulawesi Selatan | 1962   | Census        | CBH    |
| Sulawesi Selatan | 1963   | Census        | CBH    |
| Sulawesi Selatan | 1964   | Census        | CBH    |
| Sulawesi Selatan | 1965   | Census        | CBH    |
| Sulawesi Selatan | 1966   | Census        | CBH    |
| Sulawesi Selatan | 1967   | Census        | CBH    |
| Sulawesi Selatan | 1968   | Census        | CBH    |
| Sulawesi Selatan | 1969   | Census        | CBH    |
| Sulawesi Selatan | 1970   | Census        | CBH    |
| Sulawesi Selatan | 1971   | Census        | CBH    |
| Sulawesi Selatan | 1972   | Census        | CBH    |
| Sulawesi Selatan | 1973   | Census        | CBH    |
| Sulawesi Selatan | 1974   | Census        | CBH    |
| Sulawesi Selatan | 1975   | Census        | CBH    |
| Sulawesi Selatan | 1976   | Census        | CBH    |
| Sulawesi Selatan | 1977   | Census        | CBH    |
| Sulawesi Selatan | 1978   | Census        | CBH    |
| Sulawesi Selatan | 1979   | Census        | CBH    |
| Sulawesi Selatan | 1980   | Census        | CBH    |
| Sulawesi Selatan | 1980   | Census        | SBH    |
| Sulawesi Selatan | 1981   | Census        | CBH    |
| Sulawesi Selatan | 1982   | Census        | CBH    |
| Sulawesi Selatan | 1983   | Census        | CBH    |
| Sulawesi Selatan | 1984   | Census        | CBH    |
| Sulawesi Selatan | 1985   | Census        | CBH    |
| Sulawesi Selatan | 1986   | Census        | CBH    |
| Sulawesi Selatan | 1987   | Census        | CBH    |
| Sulawesi Selatan | 1988   | Census        | CBH    |
| Sulawesi Selatan | 1989   | Census        | CBH    |
| Sulawesi Selatan | 1990   | Census        | SBH    |
| Sulawesi Selatan | 1990   | Census        | CBH    |
| Sulawesi Selatan | 1991   | Census        | CBH    |
| Sulawesi Selatan | 1992   | Census        | CBH    |
| Sulawesi Selatan | 1993   | Census        | CBH    |

**Appendix Table 10. Under-5 mortality reference sources by source date and location, 1950-2016**

| Location         | Source | Source years                        | Method |
|------------------|--------|-------------------------------------|--------|
| Sulawesi Selatan | 1994   | Census                              | CBH    |
| Sulawesi Selatan | 1995   | Census                              | CBH    |
| Sulawesi Selatan | 1996   | Census                              | CBH    |
| Sulawesi Selatan | 1997   | Census                              | CBH    |
| Sulawesi Selatan | 1998   | Census                              | CBH    |
| Sulawesi Selatan | 1999   | Census                              | CBH    |
| Sulawesi Selatan | 2000   | Census                              | SBH    |
| Sulawesi Selatan | 2000   | Census                              | CBH    |
| Sulawesi Selatan | 2002   | Census                              | CBH    |
| Sulawesi Selatan | 2004   | Census                              | CBH    |
| Sulawesi Selatan | 2010   | Census                              | SBH    |
| Sulawesi Selatan | 1967   | Demographic and Health Survey (DHS) | CBH    |
| Sulawesi Selatan | 1969   | Demographic and Health Survey (DHS) | CBH    |
| Sulawesi Selatan | 1971   | Demographic and Health Survey (DHS) | CBH    |
| Sulawesi Selatan | 1973   | Demographic and Health Survey (DHS) | CBH    |
| Sulawesi Selatan | 1975   | Demographic and Health Survey (DHS) | CBH    |
| Sulawesi Selatan | 1977   | Demographic and Health Survey (DHS) | CBH    |
| Sulawesi Selatan | 1979   | Demographic and Health Survey (DHS) | CBH    |
| Sulawesi Selatan | 1981   | Demographic and Health Survey (DHS) | CBH    |
| Sulawesi Selatan | 1983   | Demographic and Health Survey (DHS) | CBH    |
| Sulawesi Selatan | 1985   | Demographic and Health Survey (DHS) | CBH    |
| Sulawesi Selatan | 1987   | Demographic and Health Survey (DHS) | SBH    |
| Sulawesi Selatan | 1987   | Demographic and Health Survey (DHS) | CBH    |
| Sulawesi Selatan | 1989   | Demographic and Health Survey (DHS) | CBH    |
| Sulawesi Selatan | 1991   | Demographic and Health Survey (DHS) | CBH    |
| Sulawesi Selatan | 1991   | Demographic and Health Survey (DHS) | SBH    |
| Sulawesi Selatan | 1993   | Demographic and Health Survey (DHS) | CBH    |
| Sulawesi Selatan | 1994   | Demographic and Health Survey (DHS) | SBH    |
| Sulawesi Selatan | 1995   | Demographic and Health Survey (DHS) | CBH    |
| Sulawesi Selatan | 1997   | Demographic and Health Survey (DHS) | CBH    |
| Sulawesi Selatan | 1997   | Demographic and Health Survey (DHS) | SBH    |
| Sulawesi Selatan | 1999   | Demographic and Health Survey (DHS) | CBH    |
| Sulawesi Selatan | 2001   | Demographic and Health Survey (DHS) | CBH    |
| Sulawesi Selatan | 2003   | Demographic and Health Survey (DHS) | CBH    |
| Sulawesi Selatan | 2003   | Demographic and Health Survey (DHS) | SBH    |
| Sulawesi Selatan | 2005   | Demographic and Health Survey (DHS) | CBH    |
| Sulawesi Selatan | 2007   | Demographic and Health Survey (DHS) | SBH    |
| Sulawesi Selatan | 2007   | Demographic and Health Survey (DHS) | CBH    |
| Sulawesi Selatan | 2009   | Demographic and Health Survey (DHS) | CBH    |
| Sulawesi Selatan | 2011   | Demographic and Health Survey (DHS) | CBH    |
| Sulawesi Selatan | 2012   | Demographic and Health Survey (DHS) | SBH    |
| Sulawesi Selatan | 1978   | Health Survey                       | CBH    |
| Sulawesi Selatan | 1980   | Health Survey                       | CBH    |
| Sulawesi Selatan | 1982   | Health Survey                       | CBH    |
| Sulawesi Selatan | 1984   | Health Survey                       | CBH    |
| Sulawesi Selatan | 1985   | Health Survey                       | SBH    |
| Sulawesi Selatan | 1986   | Health Survey                       | CBH    |
| Sulawesi Selatan | 1988   | Health Survey                       | CBH    |
| Sulawesi Selatan | 1990   | Health Survey                       | CBH    |
| Sulawesi Selatan | 1992   | Health Survey                       | SBH    |
| Sulawesi Selatan | 1992   | Health Survey                       | CBH    |
| Sulawesi Selatan | 1993   | Health Survey                       | SBH    |
| Sulawesi Selatan | 1994   | Health Survey                       | CBH    |
| Sulawesi Selatan | 1994   | Health Survey                       | SBH    |
| Sulawesi Selatan | 1995   | Health Survey                       | SBH    |
| Sulawesi Selatan | 1996   | Health Survey                       | SBH    |
| Sulawesi Selatan | 1996   | Health Survey                       | CBH    |
| Sulawesi Selatan | 1997   | Health Survey                       | SBH    |
| Sulawesi Selatan | 1998   | Health Survey                       | CBH    |
| Sulawesi Selatan | 1998   | Health Survey                       | SBH    |
| Sulawesi Selatan | 1999   | Health Survey                       | SBH    |
| Sulawesi Selatan | 2000   | Health Survey                       | SBH    |
| Sulawesi Selatan | 2000   | Health Survey                       | CBH    |
| Sulawesi Selatan | 2001   | Health Survey                       | SBH    |
| Sulawesi Selatan | 2002   | Health Survey                       | SBH    |
| Sulawesi Selatan | 2003   | Health Survey                       | SBH    |
| Sulawesi Selatan | 2004   | Health Survey                       | SBH    |

**Appendix Table 10. Under-5 mortality reference sources by source date and location, 1950-2016**

| Location         | Source | Source years                        | Method |
|------------------|--------|-------------------------------------|--------|
| Sulawesi Selatan | 2005   | Health Survey                       | SBH    |
| Sulawesi Selatan | 2006   | Health Survey                       | SBH    |
| Sulawesi Selatan | 2007   | Health Survey                       | SBH    |
| Sulawesi Selatan | 2008   | Health Survey                       | SBH    |
| Sulawesi Selatan | 2009   | Health Survey                       | SBH    |
| Sulawesi Selatan | 2010   | Health Survey                       | SBH    |
| Sulawesi Selatan | 2011   | Health Survey                       | SBH    |
| Sulawesi Selatan | 2012   | Health Survey                       | SBH    |
| Sulawesi Selatan | 2013   | Health Survey                       | SBH    |
| Sulawesi Tengah  | 1963   | Census                              | CBH    |
| Sulawesi Tengah  | 1964   | Census                              | CBH    |
| Sulawesi Tengah  | 1965   | Census                              | CBH    |
| Sulawesi Tengah  | 1966   | Census                              | CBH    |
| Sulawesi Tengah  | 1967   | Census                              | CBH    |
| Sulawesi Tengah  | 1968   | Census                              | CBH    |
| Sulawesi Tengah  | 1969   | Census                              | CBH    |
| Sulawesi Tengah  | 1970   | Census                              | CBH    |
| Sulawesi Tengah  | 1971   | Census                              | CBH    |
| Sulawesi Tengah  | 1972   | Census                              | CBH    |
| Sulawesi Tengah  | 1973   | Census                              | CBH    |
| Sulawesi Tengah  | 1974   | Census                              | CBH    |
| Sulawesi Tengah  | 1975   | Census                              | CBH    |
| Sulawesi Tengah  | 1976   | Census                              | CBH    |
| Sulawesi Tengah  | 1977   | Census                              | CBH    |
| Sulawesi Tengah  | 1978   | Census                              | CBH    |
| Sulawesi Tengah  | 1979   | Census                              | CBH    |
| Sulawesi Tengah  | 1980   | Census                              | CBH    |
| Sulawesi Tengah  | 1980   | Census                              | SBH    |
| Sulawesi Tengah  | 1981   | Census                              | CBH    |
| Sulawesi Tengah  | 1982   | Census                              | CBH    |
| Sulawesi Tengah  | 1983   | Census                              | CBH    |
| Sulawesi Tengah  | 1984   | Census                              | CBH    |
| Sulawesi Tengah  | 1985   | Census                              | CBH    |
| Sulawesi Tengah  | 1986   | Census                              | CBH    |
| Sulawesi Tengah  | 1987   | Census                              | CBH    |
| Sulawesi Tengah  | 1988   | Census                              | CBH    |
| Sulawesi Tengah  | 1989   | Census                              | CBH    |
| Sulawesi Tengah  | 1990   | Census                              | SBH    |
| Sulawesi Tengah  | 1990   | Census                              | CBH    |
| Sulawesi Tengah  | 1991   | Census                              | CBH    |
| Sulawesi Tengah  | 1992   | Census                              | CBH    |
| Sulawesi Tengah  | 1993   | Census                              | CBH    |
| Sulawesi Tengah  | 1994   | Census                              | CBH    |
| Sulawesi Tengah  | 1995   | Census                              | CBH    |
| Sulawesi Tengah  | 1996   | Census                              | CBH    |
| Sulawesi Tengah  | 1997   | Census                              | CBH    |
| Sulawesi Tengah  | 1998   | Census                              | CBH    |
| Sulawesi Tengah  | 1999   | Census                              | CBH    |
| Sulawesi Tengah  | 2000   | Census                              | SBH    |
| Sulawesi Tengah  | 2000   | Census                              | CBH    |
| Sulawesi Tengah  | 2002   | Census                              | CBH    |
| Sulawesi Tengah  | 2004   | Census                              | CBH    |
| Sulawesi Tengah  | 2010   | Census                              | SBH    |
| Sulawesi Tengah  | 1971   | Demographic and Health Survey (DHS) | CBH    |
| Sulawesi Tengah  | 1973   | Demographic and Health Survey (DHS) | CBH    |
| Sulawesi Tengah  | 1975   | Demographic and Health Survey (DHS) | CBH    |
| Sulawesi Tengah  | 1977   | Demographic and Health Survey (DHS) | CBH    |
| Sulawesi Tengah  | 1979   | Demographic and Health Survey (DHS) | CBH    |
| Sulawesi Tengah  | 1981   | Demographic and Health Survey (DHS) | CBH    |
| Sulawesi Tengah  | 1983   | Demographic and Health Survey (DHS) | CBH    |
| Sulawesi Tengah  | 1985   | Demographic and Health Survey (DHS) | CBH    |
| Sulawesi Tengah  | 1987   | Demographic and Health Survey (DHS) | CBH    |
| Sulawesi Tengah  | 1987   | Demographic and Health Survey (DHS) | SBH    |
| Sulawesi Tengah  | 1989   | Demographic and Health Survey (DHS) | CBH    |
| Sulawesi Tengah  | 1991   | Demographic and Health Survey (DHS) | CBH    |
| Sulawesi Tengah  | 1991   | Demographic and Health Survey (DHS) | SBH    |
| Sulawesi Tengah  | 1993   | Demographic and Health Survey (DHS) | CBH    |

**Appendix Table 10. Under-5 mortality reference sources by source date and location, 1950-2016**

| Location          | Source | Source years                        | Method |
|-------------------|--------|-------------------------------------|--------|
| Sulawesi Tengah   | 1994   | Demographic and Health Survey (DHS) | SBH    |
| Sulawesi Tengah   | 1995   | Demographic and Health Survey (DHS) | CBH    |
| Sulawesi Tengah   | 1997   | Demographic and Health Survey (DHS) | SBH    |
| Sulawesi Tengah   | 1997   | Demographic and Health Survey (DHS) | CBH    |
| Sulawesi Tengah   | 1999   | Demographic and Health Survey (DHS) | CBH    |
| Sulawesi Tengah   | 2001   | Demographic and Health Survey (DHS) | CBH    |
| Sulawesi Tengah   | 2003   | Demographic and Health Survey (DHS) | SBH    |
| Sulawesi Tengah   | 2003   | Demographic and Health Survey (DHS) | CBH    |
| Sulawesi Tengah   | 2005   | Demographic and Health Survey (DHS) | CBH    |
| Sulawesi Tengah   | 2007   | Demographic and Health Survey (DHS) | SBH    |
| Sulawesi Tengah   | 2007   | Demographic and Health Survey (DHS) | CBH    |
| Sulawesi Tengah   | 2009   | Demographic and Health Survey (DHS) | CBH    |
| Sulawesi Tengah   | 2011   | Demographic and Health Survey (DHS) | CBH    |
| Sulawesi Tengah   | 2012   | Demographic and Health Survey (DHS) | SBH    |
| Sulawesi Tengah   | 1985   | Health Survey                       | SBH    |
| Sulawesi Tengah   | 1992   | Health Survey                       | SBH    |
| Sulawesi Tengah   | 1993   | Health Survey                       | SBH    |
| Sulawesi Tengah   | 1994   | Health Survey                       | SBH    |
| Sulawesi Tengah   | 1995   | Health Survey                       | SBH    |
| Sulawesi Tengah   | 1996   | Health Survey                       | SBH    |
| Sulawesi Tengah   | 1998   | Health Survey                       | SBH    |
| Sulawesi Tengah   | 1999   | Health Survey                       | SBH    |
| Sulawesi Tengah   | 2000   | Health Survey                       | SBH    |
| Sulawesi Tengah   | 2001   | Health Survey                       | SBH    |
| Sulawesi Tengah   | 2002   | Health Survey                       | SBH    |
| Sulawesi Tengah   | 2003   | Health Survey                       | SBH    |
| Sulawesi Tengah   | 2004   | Health Survey                       | SBH    |
| Sulawesi Tengah   | 2005   | Health Survey                       | SBH    |
| Sulawesi Tengah   | 2006   | Health Survey                       | SBH    |
| Sulawesi Tengah   | 2007   | Health Survey                       | SBH    |
| Sulawesi Tengah   | 2008   | Health Survey                       | SBH    |
| Sulawesi Tengah   | 2009   | Health Survey                       | SBH    |
| Sulawesi Tengah   | 2010   | Health Survey                       | SBH    |
| Sulawesi Tengah   | 2011   | Health Survey                       | SBH    |
| Sulawesi Tengah   | 2012   | Health Survey                       | SBH    |
| Sulawesi Tengah   | 2013   | Health Survey                       | SBH    |
| Sulawesi Tenggara | 1962   | Census                              | CBH    |
| Sulawesi Tenggara | 1964   | Census                              | CBH    |
| Sulawesi Tenggara | 1966   | Census                              | CBH    |
| Sulawesi Tenggara | 1967   | Census                              | CBH    |
| Sulawesi Tenggara | 1968   | Census                              | CBH    |
| Sulawesi Tenggara | 1969   | Census                              | CBH    |
| Sulawesi Tenggara | 1970   | Census                              | CBH    |
| Sulawesi Tenggara | 1971   | Census                              | CBH    |
| Sulawesi Tenggara | 1972   | Census                              | CBH    |
| Sulawesi Tenggara | 1973   | Census                              | CBH    |
| Sulawesi Tenggara | 1974   | Census                              | CBH    |
| Sulawesi Tenggara | 1975   | Census                              | CBH    |
| Sulawesi Tenggara | 1976   | Census                              | CBH    |
| Sulawesi Tenggara | 1977   | Census                              | CBH    |
| Sulawesi Tenggara | 1978   | Census                              | CBH    |
| Sulawesi Tenggara | 1979   | Census                              | CBH    |
| Sulawesi Tenggara | 1980   | Census                              | SBH    |
| Sulawesi Tenggara | 1980   | Census                              | CBH    |
| Sulawesi Tenggara | 1981   | Census                              | CBH    |
| Sulawesi Tenggara | 1982   | Census                              | CBH    |
| Sulawesi Tenggara | 1983   | Census                              | CBH    |
| Sulawesi Tenggara | 1984   | Census                              | CBH    |
| Sulawesi Tenggara | 1985   | Census                              | CBH    |
| Sulawesi Tenggara | 1986   | Census                              | CBH    |
| Sulawesi Tenggara | 1987   | Census                              | CBH    |
| Sulawesi Tenggara | 1988   | Census                              | CBH    |
| Sulawesi Tenggara | 1989   | Census                              | CBH    |
| Sulawesi Tenggara | 1990   | Census                              | SBH    |
| Sulawesi Tenggara | 1990   | Census                              | CBH    |
| Sulawesi Tenggara | 1991   | Census                              | CBH    |
| Sulawesi Tenggara | 1992   | Census                              | CBH    |

**Appendix Table 10. Under-5 mortality reference sources by source date and location, 1950-2016**

| Location          | Source | Source years                        | Method |
|-------------------|--------|-------------------------------------|--------|
| Sulawesi Tenggara | 1993   | Census                              | CBH    |
| Sulawesi Tenggara | 1994   | Census                              | CBH    |
| Sulawesi Tenggara | 1995   | Census                              | CBH    |
| Sulawesi Tenggara | 1996   | Census                              | CBH    |
| Sulawesi Tenggara | 1997   | Census                              | CBH    |
| Sulawesi Tenggara | 1998   | Census                              | CBH    |
| Sulawesi Tenggara | 1999   | Census                              | CBH    |
| Sulawesi Tenggara | 2000   | Census                              | CBH    |
| Sulawesi Tenggara | 2000   | Census                              | SBH    |
| Sulawesi Tenggara | 2002   | Census                              | CBH    |
| Sulawesi Tenggara | 2004   | Census                              | CBH    |
| Sulawesi Tenggara | 2010   | Census                              | SBH    |
| Sulawesi Tenggara | 1973   | Demographic and Health Survey (DHS) | CBH    |
| Sulawesi Tenggara | 1975   | Demographic and Health Survey (DHS) | CBH    |
| Sulawesi Tenggara | 1977   | Demographic and Health Survey (DHS) | CBH    |
| Sulawesi Tenggara | 1979   | Demographic and Health Survey (DHS) | CBH    |
| Sulawesi Tenggara | 1981   | Demographic and Health Survey (DHS) | CBH    |
| Sulawesi Tenggara | 1983   | Demographic and Health Survey (DHS) | CBH    |
| Sulawesi Tenggara | 1985   | Demographic and Health Survey (DHS) | CBH    |
| Sulawesi Tenggara | 1987   | Demographic and Health Survey (DHS) | SBH    |
| Sulawesi Tenggara | 1987   | Demographic and Health Survey (DHS) | CBH    |
| Sulawesi Tenggara | 1989   | Demographic and Health Survey (DHS) | CBH    |
| Sulawesi Tenggara | 1991   | Demographic and Health Survey (DHS) | CBH    |
| Sulawesi Tenggara | 1991   | Demographic and Health Survey (DHS) | SBH    |
| Sulawesi Tenggara | 1993   | Demographic and Health Survey (DHS) | CBH    |
| Sulawesi Tenggara | 1994   | Demographic and Health Survey (DHS) | SBH    |
| Sulawesi Tenggara | 1995   | Demographic and Health Survey (DHS) | CBH    |
| Sulawesi Tenggara | 1997   | Demographic and Health Survey (DHS) | SBH    |
| Sulawesi Tenggara | 1997   | Demographic and Health Survey (DHS) | CBH    |
| Sulawesi Tenggara | 1999   | Demographic and Health Survey (DHS) | CBH    |
| Sulawesi Tenggara | 2001   | Demographic and Health Survey (DHS) | CBH    |
| Sulawesi Tenggara | 2003   | Demographic and Health Survey (DHS) | SBH    |
| Sulawesi Tenggara | 2003   | Demographic and Health Survey (DHS) | CBH    |
| Sulawesi Tenggara | 2005   | Demographic and Health Survey (DHS) | CBH    |
| Sulawesi Tenggara | 2007   | Demographic and Health Survey (DHS) | CBH    |
| Sulawesi Tenggara | 2007   | Demographic and Health Survey (DHS) | SBH    |
| Sulawesi Tenggara | 2009   | Demographic and Health Survey (DHS) | CBH    |
| Sulawesi Tenggara | 2011   | Demographic and Health Survey (DHS) | CBH    |
| Sulawesi Tenggara | 2012   | Demographic and Health Survey (DHS) | SBH    |
| Sulawesi Tenggara | 1985   | Health Survey                       | SBH    |
| Sulawesi Tenggara | 1992   | Health Survey                       | SBH    |
| Sulawesi Tenggara | 1993   | Health Survey                       | SBH    |
| Sulawesi Tenggara | 1994   | Health Survey                       | SBH    |
| Sulawesi Tenggara | 1995   | Health Survey                       | CBH    |
| Sulawesi Tenggara | 1995   | Health Survey                       | SBH    |
| Sulawesi Tenggara | 1996   | Health Survey                       | SBH    |
| Sulawesi Tenggara | 1997   | Health Survey                       | CBH    |
| Sulawesi Tenggara | 1998   | Health Survey                       | SBH    |
| Sulawesi Tenggara | 1999   | Health Survey                       | CBH    |
| Sulawesi Tenggara | 1999   | Health Survey                       | SBH    |
| Sulawesi Tenggara | 2000   | Health Survey                       | SBH    |
| Sulawesi Tenggara | 2001   | Health Survey                       | SBH    |
| Sulawesi Tenggara | 2001   | Health Survey                       | CBH    |
| Sulawesi Tenggara | 2002   | Health Survey                       | SBH    |
| Sulawesi Tenggara | 2003   | Health Survey                       | CBH    |
| Sulawesi Tenggara | 2003   | Health Survey                       | SBH    |
| Sulawesi Tenggara | 2004   | Health Survey                       | SBH    |
| Sulawesi Tenggara | 2005   | Health Survey                       | SBH    |
| Sulawesi Tenggara | 2005   | Health Survey                       | CBH    |
| Sulawesi Tenggara | 2006   | Health Survey                       | SBH    |
| Sulawesi Tenggara | 2007   | Health Survey                       | CBH    |
| Sulawesi Tenggara | 2007   | Health Survey                       | SBH    |
| Sulawesi Tenggara | 2008   | Health Survey                       | SBH    |
| Sulawesi Tenggara | 2009   | Health Survey                       | CBH    |
| Sulawesi Tenggara | 2009   | Health Survey                       | SBH    |
| Sulawesi Tenggara | 2010   | Health Survey                       | SBH    |
| Sulawesi Tenggara | 2011   | Health Survey                       | CBH    |



**Appendix Table 10. Under-5 mortality reference sources by source date and location, 1950-2016**

| Location          | Source | Source years                        | Method |
|-------------------|--------|-------------------------------------|--------|
| Sulawesi Tenggara | 2011   | Health Survey                       | SBH    |
| Sulawesi Tenggara | 2012   | Health Survey                       | SBH    |
| Sulawesi Tenggara | 2013   | Health Survey                       | SBH    |
| Sulawesi Utara    | 1960   | Census                              | CBH    |
| Sulawesi Utara    | 1962   | Census                              | CBH    |
| Sulawesi Utara    | 1964   | Census                              | CBH    |
| Sulawesi Utara    | 1965   | Census                              | CBH    |
| Sulawesi Utara    | 1966   | Census                              | CBH    |
| Sulawesi Utara    | 1967   | Census                              | CBH    |
| Sulawesi Utara    | 1968   | Census                              | CBH    |
| Sulawesi Utara    | 1969   | Census                              | CBH    |
| Sulawesi Utara    | 1970   | Census                              | CBH    |
| Sulawesi Utara    | 1971   | Census                              | CBH    |
| Sulawesi Utara    | 1972   | Census                              | CBH    |
| Sulawesi Utara    | 1973   | Census                              | CBH    |
| Sulawesi Utara    | 1974   | Census                              | CBH    |
| Sulawesi Utara    | 1975   | Census                              | CBH    |
| Sulawesi Utara    | 1976   | Census                              | CBH    |
| Sulawesi Utara    | 1977   | Census                              | CBH    |
| Sulawesi Utara    | 1978   | Census                              | CBH    |
| Sulawesi Utara    | 1979   | Census                              | CBH    |
| Sulawesi Utara    | 1980   | Census                              | SBH    |
| Sulawesi Utara    | 1980   | Census                              | CBH    |
| Sulawesi Utara    | 1981   | Census                              | CBH    |
| Sulawesi Utara    | 1982   | Census                              | CBH    |
| Sulawesi Utara    | 1983   | Census                              | CBH    |
| Sulawesi Utara    | 1984   | Census                              | CBH    |
| Sulawesi Utara    | 1985   | Census                              | CBH    |
| Sulawesi Utara    | 1986   | Census                              | CBH    |
| Sulawesi Utara    | 1987   | Census                              | CBH    |
| Sulawesi Utara    | 1988   | Census                              | CBH    |
| Sulawesi Utara    | 1989   | Census                              | CBH    |
| Sulawesi Utara    | 1990   | Census                              | SBH    |
| Sulawesi Utara    | 1990   | Census                              | CBH    |
| Sulawesi Utara    | 1991   | Census                              | CBH    |
| Sulawesi Utara    | 1992   | Census                              | CBH    |
| Sulawesi Utara    | 1993   | Census                              | CBH    |
| Sulawesi Utara    | 1994   | Census                              | CBH    |
| Sulawesi Utara    | 1995   | Census                              | CBH    |
| Sulawesi Utara    | 1996   | Census                              | CBH    |
| Sulawesi Utara    | 1997   | Census                              | CBH    |
| Sulawesi Utara    | 1998   | Census                              | CBH    |
| Sulawesi Utara    | 1999   | Census                              | CBH    |
| Sulawesi Utara    | 2000   | Census                              | SBH    |
| Sulawesi Utara    | 2000   | Census                              | CBH    |
| Sulawesi Utara    | 2002   | Census                              | CBH    |
| Sulawesi Utara    | 2004   | Census                              | CBH    |
| Sulawesi Utara    | 2010   | Census                              | SBH    |
| Sulawesi Utara    | 1973   | Demographic and Health Survey (DHS) | CBH    |
| Sulawesi Utara    | 1975   | Demographic and Health Survey (DHS) | CBH    |
| Sulawesi Utara    | 1977   | Demographic and Health Survey (DHS) | CBH    |
| Sulawesi Utara    | 1979   | Demographic and Health Survey (DHS) | CBH    |
| Sulawesi Utara    | 1981   | Demographic and Health Survey (DHS) | CBH    |
| Sulawesi Utara    | 1983   | Demographic and Health Survey (DHS) | CBH    |
| Sulawesi Utara    | 1985   | Demographic and Health Survey (DHS) | CBH    |
| Sulawesi Utara    | 1987   | Demographic and Health Survey (DHS) | CBH    |
| Sulawesi Utara    | 1987   | Demographic and Health Survey (DHS) | SBH    |
| Sulawesi Utara    | 1989   | Demographic and Health Survey (DHS) | CBH    |
| Sulawesi Utara    | 1991   | Demographic and Health Survey (DHS) | CBH    |
| Sulawesi Utara    | 1991   | Demographic and Health Survey (DHS) | SBH    |
| Sulawesi Utara    | 1993   | Demographic and Health Survey (DHS) | CBH    |
| Sulawesi Utara    | 1994   | Demographic and Health Survey (DHS) | SBH    |
| Sulawesi Utara    | 1995   | Demographic and Health Survey (DHS) | CBH    |
| Sulawesi Utara    | 1997   | Demographic and Health Survey (DHS) | CBH    |
| Sulawesi Utara    | 1997   | Demographic and Health Survey (DHS) | SBH    |
| Sulawesi Utara    | 1999   | Demographic and Health Survey (DHS) | CBH    |
| Sulawesi Utara    | 2001   | Demographic and Health Survey (DHS) | CBH    |

**Appendix Table 10. Under-5 mortality reference sources by source date and location, 1950-2016**

| Location       | Source | Source years                        | Method |
|----------------|--------|-------------------------------------|--------|
| Sulawesi Utara | 2003   | Demographic and Health Survey (DHS) | CBH    |
| Sulawesi Utara | 2003   | Demographic and Health Survey (DHS) | SBH    |
| Sulawesi Utara | 2005   | Demographic and Health Survey (DHS) | CBH    |
| Sulawesi Utara | 2007   | Demographic and Health Survey (DHS) | CBH    |
| Sulawesi Utara | 2007   | Demographic and Health Survey (DHS) | SBH    |
| Sulawesi Utara | 2009   | Demographic and Health Survey (DHS) | CBH    |
| Sulawesi Utara | 2011   | Demographic and Health Survey (DHS) | CBH    |
| Sulawesi Utara | 2012   | Demographic and Health Survey (DHS) | SBH    |
| Sulawesi Utara | 1985   | Health Survey                       | SBH    |
| Sulawesi Utara | 1992   | Health Survey                       | SBH    |
| Sulawesi Utara | 1993   | Health Survey                       | SBH    |
| Sulawesi Utara | 1994   | Health Survey                       | SBH    |
| Sulawesi Utara | 1995   | Health Survey                       | SBH    |
| Sulawesi Utara | 1996   | Health Survey                       | SBH    |
| Sulawesi Utara | 1998   | Health Survey                       | SBH    |
| Sulawesi Utara | 1999   | Health Survey                       | SBH    |
| Sulawesi Utara | 2000   | Health Survey                       | SBH    |
| Sulawesi Utara | 2001   | Health Survey                       | SBH    |
| Sulawesi Utara | 2002   | Health Survey                       | SBH    |
| Sulawesi Utara | 2003   | Health Survey                       | SBH    |
| Sulawesi Utara | 2004   | Health Survey                       | SBH    |
| Sulawesi Utara | 2005   | Health Survey                       | SBH    |
| Sulawesi Utara | 2006   | Health Survey                       | SBH    |
| Sulawesi Utara | 2007   | Health Survey                       | SBH    |
| Sulawesi Utara | 2008   | Health Survey                       | SBH    |
| Sulawesi Utara | 2009   | Health Survey                       | SBH    |
| Sulawesi Utara | 2010   | Health Survey                       | SBH    |
| Sulawesi Utara | 2011   | Health Survey                       | SBH    |
| Sulawesi Utara | 2012   | Health Survey                       | SBH    |
| Sulawesi Utara | 2013   | Health Survey                       | SBH    |
| Sumatera Barat | 1952   | Census                              | CBH    |
| Sumatera Barat | 1953   | Census                              | CBH    |
| Sumatera Barat | 1954   | Census                              | CBH    |
| Sumatera Barat | 1955   | Census                              | CBH    |
| Sumatera Barat | 1956   | Census                              | CBH    |
| Sumatera Barat | 1957   | Census                              | CBH    |
| Sumatera Barat | 1958   | Census                              | CBH    |
| Sumatera Barat | 1959   | Census                              | CBH    |
| Sumatera Barat | 1960   | Census                              | CBH    |
| Sumatera Barat | 1961   | Census                              | CBH    |
| Sumatera Barat | 1962   | Census                              | CBH    |
| Sumatera Barat | 1963   | Census                              | CBH    |
| Sumatera Barat | 1964   | Census                              | CBH    |
| Sumatera Barat | 1965   | Census                              | CBH    |
| Sumatera Barat | 1966   | Census                              | CBH    |
| Sumatera Barat | 1967   | Census                              | CBH    |
| Sumatera Barat | 1968   | Census                              | CBH    |
| Sumatera Barat | 1969   | Census                              | CBH    |
| Sumatera Barat | 1970   | Census                              | CBH    |
| Sumatera Barat | 1971   | Census                              | CBH    |
| Sumatera Barat | 1972   | Census                              | CBH    |
| Sumatera Barat | 1973   | Census                              | CBH    |
| Sumatera Barat | 1974   | Census                              | CBH    |
| Sumatera Barat | 1975   | Census                              | CBH    |
| Sumatera Barat | 1976   | Census                              | CBH    |
| Sumatera Barat | 1977   | Census                              | CBH    |
| Sumatera Barat | 1978   | Census                              | CBH    |
| Sumatera Barat | 1979   | Census                              | CBH    |
| Sumatera Barat | 1980   | Census                              | CBH    |
| Sumatera Barat | 1980   | Census                              | SBH    |
| Sumatera Barat | 1981   | Census                              | CBH    |
| Sumatera Barat | 1982   | Census                              | CBH    |
| Sumatera Barat | 1983   | Census                              | CBH    |
| Sumatera Barat | 1984   | Census                              | CBH    |
| Sumatera Barat | 1985   | Census                              | CBH    |
| Sumatera Barat | 1986   | Census                              | CBH    |
| Sumatera Barat | 1987   | Census                              | CBH    |

**Appendix Table 10. Under-5 mortality reference sources by source date and location, 1950-2016**

| Location       | Source | Source years                        | Method |
|----------------|--------|-------------------------------------|--------|
| Sumatera Barat | 1988   | Census                              | CBH    |
| Sumatera Barat | 1989   | Census                              | CBH    |
| Sumatera Barat | 1990   | Census                              | CBH    |
| Sumatera Barat | 1990   | Census                              | SBH    |
| Sumatera Barat | 1991   | Census                              | CBH    |
| Sumatera Barat | 1992   | Census                              | CBH    |
| Sumatera Barat | 1993   | Census                              | CBH    |
| Sumatera Barat | 1994   | Census                              | CBH    |
| Sumatera Barat | 1995   | Census                              | CBH    |
| Sumatera Barat | 1996   | Census                              | CBH    |
| Sumatera Barat | 1997   | Census                              | CBH    |
| Sumatera Barat | 1998   | Census                              | CBH    |
| Sumatera Barat | 1999   | Census                              | CBH    |
| Sumatera Barat | 2000   | Census                              | SBH    |
| Sumatera Barat | 2000   | Census                              | CBH    |
| Sumatera Barat | 2002   | Census                              | CBH    |
| Sumatera Barat | 2004   | Census                              | CBH    |
| Sumatera Barat | 2010   | Census                              | SBH    |
| Sumatera Barat | 1969   | Demographic and Health Survey (DHS) | CBH    |
| Sumatera Barat | 1971   | Demographic and Health Survey (DHS) | CBH    |
| Sumatera Barat | 1973   | Demographic and Health Survey (DHS) | CBH    |
| Sumatera Barat | 1975   | Demographic and Health Survey (DHS) | CBH    |
| Sumatera Barat | 1977   | Demographic and Health Survey (DHS) | CBH    |
| Sumatera Barat | 1979   | Demographic and Health Survey (DHS) | CBH    |
| Sumatera Barat | 1981   | Demographic and Health Survey (DHS) | CBH    |
| Sumatera Barat | 1983   | Demographic and Health Survey (DHS) | CBH    |
| Sumatera Barat | 1985   | Demographic and Health Survey (DHS) | CBH    |
| Sumatera Barat | 1987   | Demographic and Health Survey (DHS) | SBH    |
| Sumatera Barat | 1987   | Demographic and Health Survey (DHS) | CBH    |
| Sumatera Barat | 1989   | Demographic and Health Survey (DHS) | CBH    |
| Sumatera Barat | 1991   | Demographic and Health Survey (DHS) | SBH    |
| Sumatera Barat | 1991   | Demographic and Health Survey (DHS) | CBH    |
| Sumatera Barat | 1993   | Demographic and Health Survey (DHS) | CBH    |
| Sumatera Barat | 1994   | Demographic and Health Survey (DHS) | SBH    |
| Sumatera Barat | 1995   | Demographic and Health Survey (DHS) | CBH    |
| Sumatera Barat | 1997   | Demographic and Health Survey (DHS) | CBH    |
| Sumatera Barat | 1997   | Demographic and Health Survey (DHS) | SBH    |
| Sumatera Barat | 1999   | Demographic and Health Survey (DHS) | CBH    |
| Sumatera Barat | 2001   | Demographic and Health Survey (DHS) | CBH    |
| Sumatera Barat | 2003   | Demographic and Health Survey (DHS) | SBH    |
| Sumatera Barat | 2003   | Demographic and Health Survey (DHS) | CBH    |
| Sumatera Barat | 2005   | Demographic and Health Survey (DHS) | CBH    |
| Sumatera Barat | 2007   | Demographic and Health Survey (DHS) | CBH    |
| Sumatera Barat | 2007   | Demographic and Health Survey (DHS) | SBH    |
| Sumatera Barat | 2009   | Demographic and Health Survey (DHS) | CBH    |
| Sumatera Barat | 2011   | Demographic and Health Survey (DHS) | CBH    |
| Sumatera Barat | 2012   | Demographic and Health Survey (DHS) | SBH    |
| Sumatera Barat | 1982   | Health Survey                       | CBH    |
| Sumatera Barat | 1984   | Health Survey                       | CBH    |
| Sumatera Barat | 1985   | Health Survey                       | SBH    |
| Sumatera Barat | 1986   | Health Survey                       | CBH    |
| Sumatera Barat | 1988   | Health Survey                       | CBH    |
| Sumatera Barat | 1990   | Health Survey                       | CBH    |
| Sumatera Barat | 1992   | Health Survey                       | CBH    |
| Sumatera Barat | 1992   | Health Survey                       | SBH    |
| Sumatera Barat | 1993   | Health Survey                       | SBH    |
| Sumatera Barat | 1994   | Health Survey                       | SBH    |
| Sumatera Barat | 1994   | Health Survey                       | CBH    |
| Sumatera Barat | 1995   | Health Survey                       | SBH    |
| Sumatera Barat | 1996   | Health Survey                       | SBH    |
| Sumatera Barat | 1996   | Health Survey                       | CBH    |
| Sumatera Barat | 1997   | Health Survey                       | SBH    |
| Sumatera Barat | 1998   | Health Survey                       | SBH    |
| Sumatera Barat | 1998   | Health Survey                       | CBH    |
| Sumatera Barat | 1999   | Health Survey                       | SBH    |
| Sumatera Barat | 2000   | Health Survey                       | CBH    |
| Sumatera Barat | 2000   | Health Survey                       | SBH    |

**Appendix Table 10. Under-5 mortality reference sources by source date and location, 1950-2016**

| Location         | Source | Source years                        | Method |
|------------------|--------|-------------------------------------|--------|
| Sumatera Barat   | 2001   | Health Survey                       | SBH    |
| Sumatera Barat   | 2002   | Health Survey                       | SBH    |
| Sumatera Barat   | 2003   | Health Survey                       | SBH    |
| Sumatera Barat   | 2004   | Health Survey                       | SBH    |
| Sumatera Barat   | 2005   | Health Survey                       | SBH    |
| Sumatera Barat   | 2006   | Health Survey                       | SBH    |
| Sumatera Barat   | 2007   | Health Survey                       | SBH    |
| Sumatera Barat   | 2008   | Health Survey                       | SBH    |
| Sumatera Barat   | 2009   | Health Survey                       | SBH    |
| Sumatera Barat   | 2010   | Health Survey                       | SBH    |
| Sumatera Barat   | 2011   | Health Survey                       | SBH    |
| Sumatera Barat   | 2012   | Health Survey                       | SBH    |
| Sumatera Barat   | 2013   | Health Survey                       | SBH    |
| Sumatera Selatan | 1960   | Census                              | CBH    |
| Sumatera Selatan | 1961   | Census                              | CBH    |
| Sumatera Selatan | 1962   | Census                              | CBH    |
| Sumatera Selatan | 1963   | Census                              | CBH    |
| Sumatera Selatan | 1964   | Census                              | CBH    |
| Sumatera Selatan | 1965   | Census                              | CBH    |
| Sumatera Selatan | 1966   | Census                              | CBH    |
| Sumatera Selatan | 1967   | Census                              | CBH    |
| Sumatera Selatan | 1968   | Census                              | CBH    |
| Sumatera Selatan | 1969   | Census                              | CBH    |
| Sumatera Selatan | 1970   | Census                              | CBH    |
| Sumatera Selatan | 1971   | Census                              | CBH    |
| Sumatera Selatan | 1972   | Census                              | CBH    |
| Sumatera Selatan | 1973   | Census                              | CBH    |
| Sumatera Selatan | 1974   | Census                              | CBH    |
| Sumatera Selatan | 1975   | Census                              | CBH    |
| Sumatera Selatan | 1976   | Census                              | CBH    |
| Sumatera Selatan | 1977   | Census                              | CBH    |
| Sumatera Selatan | 1978   | Census                              | CBH    |
| Sumatera Selatan | 1979   | Census                              | CBH    |
| Sumatera Selatan | 1980   | Census                              | CBH    |
| Sumatera Selatan | 1980   | Census                              | SBH    |
| Sumatera Selatan | 1981   | Census                              | CBH    |
| Sumatera Selatan | 1982   | Census                              | CBH    |
| Sumatera Selatan | 1983   | Census                              | CBH    |
| Sumatera Selatan | 1984   | Census                              | CBH    |
| Sumatera Selatan | 1985   | Census                              | CBH    |
| Sumatera Selatan | 1986   | Census                              | CBH    |
| Sumatera Selatan | 1987   | Census                              | CBH    |
| Sumatera Selatan | 1988   | Census                              | CBH    |
| Sumatera Selatan | 1989   | Census                              | CBH    |
| Sumatera Selatan | 1990   | Census                              | SBH    |
| Sumatera Selatan | 1990   | Census                              | CBH    |
| Sumatera Selatan | 1991   | Census                              | CBH    |
| Sumatera Selatan | 1992   | Census                              | CBH    |
| Sumatera Selatan | 1993   | Census                              | CBH    |
| Sumatera Selatan | 1994   | Census                              | CBH    |
| Sumatera Selatan | 1995   | Census                              | CBH    |
| Sumatera Selatan | 1996   | Census                              | CBH    |
| Sumatera Selatan | 1997   | Census                              | CBH    |
| Sumatera Selatan | 1998   | Census                              | CBH    |
| Sumatera Selatan | 1999   | Census                              | CBH    |
| Sumatera Selatan | 2000   | Census                              | CBH    |
| Sumatera Selatan | 2000   | Census                              | SBH    |
| Sumatera Selatan | 2002   | Census                              | CBH    |
| Sumatera Selatan | 2004   | Census                              | CBH    |
| Sumatera Selatan | 2010   | Census                              | SBH    |
| Sumatera Selatan | 1967   | Demographic and Health Survey (DHS) | CBH    |
| Sumatera Selatan | 1969   | Demographic and Health Survey (DHS) | CBH    |
| Sumatera Selatan | 1971   | Demographic and Health Survey (DHS) | CBH    |
| Sumatera Selatan | 1973   | Demographic and Health Survey (DHS) | CBH    |
| Sumatera Selatan | 1975   | Demographic and Health Survey (DHS) | CBH    |
| Sumatera Selatan | 1977   | Demographic and Health Survey (DHS) | CBH    |
| Sumatera Selatan | 1979   | Demographic and Health Survey (DHS) | CBH    |

**Appendix Table 10. Under-5 mortality reference sources by source date and location, 1950-2016**

| Location         | Source | Source years                        | Method |
|------------------|--------|-------------------------------------|--------|
| Sumatera Selatan | 1981   | Demographic and Health Survey (DHS) | CBH    |
| Sumatera Selatan | 1983   | Demographic and Health Survey (DHS) | CBH    |
| Sumatera Selatan | 1985   | Demographic and Health Survey (DHS) | CBH    |
| Sumatera Selatan | 1987   | Demographic and Health Survey (DHS) | CBH    |
| Sumatera Selatan | 1987   | Demographic and Health Survey (DHS) | SBH    |
| Sumatera Selatan | 1989   | Demographic and Health Survey (DHS) | CBH    |
| Sumatera Selatan | 1991   | Demographic and Health Survey (DHS) | CBH    |
| Sumatera Selatan | 1991   | Demographic and Health Survey (DHS) | SBH    |
| Sumatera Selatan | 1993   | Demographic and Health Survey (DHS) | CBH    |
| Sumatera Selatan | 1994   | Demographic and Health Survey (DHS) | SBH    |
| Sumatera Selatan | 1995   | Demographic and Health Survey (DHS) | CBH    |
| Sumatera Selatan | 1997   | Demographic and Health Survey (DHS) | CBH    |
| Sumatera Selatan | 1997   | Demographic and Health Survey (DHS) | SBH    |
| Sumatera Selatan | 1999   | Demographic and Health Survey (DHS) | CBH    |
| Sumatera Selatan | 2001   | Demographic and Health Survey (DHS) | CBH    |
| Sumatera Selatan | 2003   | Demographic and Health Survey (DHS) | CBH    |
| Sumatera Selatan | 2003   | Demographic and Health Survey (DHS) | SBH    |
| Sumatera Selatan | 2005   | Demographic and Health Survey (DHS) | CBH    |
| Sumatera Selatan | 2007   | Demographic and Health Survey (DHS) | CBH    |
| Sumatera Selatan | 2007   | Demographic and Health Survey (DHS) | SBH    |
| Sumatera Selatan | 2009   | Demographic and Health Survey (DHS) | CBH    |
| Sumatera Selatan | 2011   | Demographic and Health Survey (DHS) | CBH    |
| Sumatera Selatan | 2012   | Demographic and Health Survey (DHS) | SBH    |
| Sumatera Selatan | 1982   | Health Survey                       | CBH    |
| Sumatera Selatan | 1984   | Health Survey                       | CBH    |
| Sumatera Selatan | 1985   | Health Survey                       | SBH    |
| Sumatera Selatan | 1986   | Health Survey                       | CBH    |
| Sumatera Selatan | 1988   | Health Survey                       | CBH    |
| Sumatera Selatan | 1990   | Health Survey                       | CBH    |
| Sumatera Selatan | 1992   | Health Survey                       | SBH    |
| Sumatera Selatan | 1992   | Health Survey                       | CBH    |
| Sumatera Selatan | 1993   | Health Survey                       | SBH    |
| Sumatera Selatan | 1994   | Health Survey                       | SBH    |
| Sumatera Selatan | 1994   | Health Survey                       | CBH    |
| Sumatera Selatan | 1995   | Health Survey                       | SBH    |
| Sumatera Selatan | 1996   | Health Survey                       | CBH    |
| Sumatera Selatan | 1996   | Health Survey                       | SBH    |
| Sumatera Selatan | 1997   | Health Survey                       | SBH    |
| Sumatera Selatan | 1998   | Health Survey                       | CBH    |
| Sumatera Selatan | 1998   | Health Survey                       | SBH    |
| Sumatera Selatan | 1999   | Health Survey                       | SBH    |
| Sumatera Selatan | 2000   | Health Survey                       | CBH    |
| Sumatera Selatan | 2000   | Health Survey                       | SBH    |
| Sumatera Selatan | 2001   | Health Survey                       | SBH    |
| Sumatera Selatan | 2002   | Health Survey                       | SBH    |
| Sumatera Selatan | 2003   | Health Survey                       | SBH    |
| Sumatera Selatan | 2004   | Health Survey                       | SBH    |
| Sumatera Selatan | 2005   | Health Survey                       | SBH    |
| Sumatera Selatan | 2006   | Health Survey                       | SBH    |
| Sumatera Selatan | 2007   | Health Survey                       | SBH    |
| Sumatera Selatan | 2008   | Health Survey                       | SBH    |
| Sumatera Selatan | 2009   | Health Survey                       | SBH    |
| Sumatera Selatan | 2010   | Health Survey                       | SBH    |
| Sumatera Selatan | 2011   | Health Survey                       | SBH    |
| Sumatera Selatan | 2012   | Health Survey                       | SBH    |
| Sumatera Selatan | 2013   | Health Survey                       | SBH    |
| Sumatera Utara   | 1951   | Census                              | CBH    |
| Sumatera Utara   | 1952   | Census                              | CBH    |
| Sumatera Utara   | 1953   | Census                              | CBH    |
| Sumatera Utara   | 1954   | Census                              | CBH    |
| Sumatera Utara   | 1955   | Census                              | CBH    |
| Sumatera Utara   | 1956   | Census                              | CBH    |
| Sumatera Utara   | 1957   | Census                              | CBH    |
| Sumatera Utara   | 1958   | Census                              | CBH    |
| Sumatera Utara   | 1959   | Census                              | CBH    |
| Sumatera Utara   | 1960   | Census                              | CBH    |
| Sumatera Utara   | 1961   | Census                              | CBH    |

**Appendix Table 10. Under-5 mortality reference sources by source date and location, 1950-2016**

| Location       | Source | Source years                        | Method |
|----------------|--------|-------------------------------------|--------|
| Sumatera Utara | 1962   | Census                              | CBH    |
| Sumatera Utara | 1963   | Census                              | CBH    |
| Sumatera Utara | 1964   | Census                              | CBH    |
| Sumatera Utara | 1965   | Census                              | CBH    |
| Sumatera Utara | 1966   | Census                              | CBH    |
| Sumatera Utara | 1967   | Census                              | CBH    |
| Sumatera Utara | 1968   | Census                              | CBH    |
| Sumatera Utara | 1969   | Census                              | CBH    |
| Sumatera Utara | 1970   | Census                              | CBH    |
| Sumatera Utara | 1971   | Census                              | CBH    |
| Sumatera Utara | 1972   | Census                              | CBH    |
| Sumatera Utara | 1973   | Census                              | CBH    |
| Sumatera Utara | 1974   | Census                              | CBH    |
| Sumatera Utara | 1975   | Census                              | CBH    |
| Sumatera Utara | 1976   | Census                              | CBH    |
| Sumatera Utara | 1977   | Census                              | CBH    |
| Sumatera Utara | 1978   | Census                              | CBH    |
| Sumatera Utara | 1979   | Census                              | CBH    |
| Sumatera Utara | 1980   | Census                              | CBH    |
| Sumatera Utara | 1980   | Census                              | SBH    |
| Sumatera Utara | 1981   | Census                              | CBH    |
| Sumatera Utara | 1982   | Census                              | CBH    |
| Sumatera Utara | 1983   | Census                              | CBH    |
| Sumatera Utara | 1984   | Census                              | CBH    |
| Sumatera Utara | 1985   | Census                              | CBH    |
| Sumatera Utara | 1986   | Census                              | CBH    |
| Sumatera Utara | 1987   | Census                              | CBH    |
| Sumatera Utara | 1988   | Census                              | CBH    |
| Sumatera Utara | 1989   | Census                              | CBH    |
| Sumatera Utara | 1990   | Census                              | SBH    |
| Sumatera Utara | 1990   | Census                              | CBH    |
| Sumatera Utara | 1991   | Census                              | CBH    |
| Sumatera Utara | 1992   | Census                              | CBH    |
| Sumatera Utara | 1993   | Census                              | CBH    |
| Sumatera Utara | 1994   | Census                              | CBH    |
| Sumatera Utara | 1995   | Census                              | CBH    |
| Sumatera Utara | 1996   | Census                              | CBH    |
| Sumatera Utara | 1997   | Census                              | CBH    |
| Sumatera Utara | 1998   | Census                              | CBH    |
| Sumatera Utara | 1999   | Census                              | CBH    |
| Sumatera Utara | 2000   | Census                              | SBH    |
| Sumatera Utara | 2000   | Census                              | CBH    |
| Sumatera Utara | 2002   | Census                              | CBH    |
| Sumatera Utara | 2004   | Census                              | CBH    |
| Sumatera Utara | 2010   | Census                              | SBH    |
| Sumatera Utara | 1967   | Demographic and Health Survey (DHS) | CBH    |
| Sumatera Utara | 1969   | Demographic and Health Survey (DHS) | CBH    |
| Sumatera Utara | 1971   | Demographic and Health Survey (DHS) | CBH    |
| Sumatera Utara | 1973   | Demographic and Health Survey (DHS) | CBH    |
| Sumatera Utara | 1975   | Demographic and Health Survey (DHS) | CBH    |
| Sumatera Utara | 1977   | Demographic and Health Survey (DHS) | CBH    |
| Sumatera Utara | 1979   | Demographic and Health Survey (DHS) | CBH    |
| Sumatera Utara | 1981   | Demographic and Health Survey (DHS) | CBH    |
| Sumatera Utara | 1983   | Demographic and Health Survey (DHS) | CBH    |
| Sumatera Utara | 1985   | Demographic and Health Survey (DHS) | CBH    |
| Sumatera Utara | 1987   | Demographic and Health Survey (DHS) | SBH    |
| Sumatera Utara | 1987   | Demographic and Health Survey (DHS) | CBH    |
| Sumatera Utara | 1989   | Demographic and Health Survey (DHS) | CBH    |
| Sumatera Utara | 1991   | Demographic and Health Survey (DHS) | SBH    |
| Sumatera Utara | 1991   | Demographic and Health Survey (DHS) | CBH    |
| Sumatera Utara | 1993   | Demographic and Health Survey (DHS) | CBH    |
| Sumatera Utara | 1994   | Demographic and Health Survey (DHS) | SBH    |
| Sumatera Utara | 1995   | Demographic and Health Survey (DHS) | CBH    |
| Sumatera Utara | 1997   | Demographic and Health Survey (DHS) | CBH    |
| Sumatera Utara | 1997   | Demographic and Health Survey (DHS) | SBH    |
| Sumatera Utara | 1999   | Demographic and Health Survey (DHS) | CBH    |
| Sumatera Utara | 2001   | Demographic and Health Survey (DHS) | CBH    |

**Appendix Table 10. Under-5 mortality reference sources by source date and location, 1950-2016**

| Location       | Source | Source years                        | Method |
|----------------|--------|-------------------------------------|--------|
| Sumatera Utara | 2003   | Demographic and Health Survey (DHS) | CBH    |
| Sumatera Utara | 2003   | Demographic and Health Survey (DHS) | SBH    |
| Sumatera Utara | 2005   | Demographic and Health Survey (DHS) | CBH    |
| Sumatera Utara | 2007   | Demographic and Health Survey (DHS) | CBH    |
| Sumatera Utara | 2007   | Demographic and Health Survey (DHS) | SBH    |
| Sumatera Utara | 2009   | Demographic and Health Survey (DHS) | CBH    |
| Sumatera Utara | 2011   | Demographic and Health Survey (DHS) | CBH    |
| Sumatera Utara | 2012   | Demographic and Health Survey (DHS) | SBH    |
| Sumatera Utara | 1982   | Health Survey                       | CBH    |
| Sumatera Utara | 1984   | Health Survey                       | CBH    |
| Sumatera Utara | 1985   | Health Survey                       | SBH    |
| Sumatera Utara | 1986   | Health Survey                       | CBH    |
| Sumatera Utara | 1988   | Health Survey                       | CBH    |
| Sumatera Utara | 1990   | Health Survey                       | CBH    |
| Sumatera Utara | 1992   | Health Survey                       | SBH    |
| Sumatera Utara | 1992   | Health Survey                       | CBH    |
| Sumatera Utara | 1993   | Health Survey                       | SBH    |
| Sumatera Utara | 1994   | Health Survey                       | SBH    |
| Sumatera Utara | 1994   | Health Survey                       | CBH    |
| Sumatera Utara | 1995   | Health Survey                       | SBH    |
| Sumatera Utara | 1996   | Health Survey                       | SBH    |
| Sumatera Utara | 1996   | Health Survey                       | CBH    |
| Sumatera Utara | 1997   | Health Survey                       | SBH    |
| Sumatera Utara | 1998   | Health Survey                       | SBH    |
| Sumatera Utara | 1998   | Health Survey                       | CBH    |
| Sumatera Utara | 1999   | Health Survey                       | SBH    |
| Sumatera Utara | 2000   | Health Survey                       | CBH    |
| Sumatera Utara | 2000   | Health Survey                       | SBH    |
| Sumatera Utara | 2001   | Health Survey                       | SBH    |
| Sumatera Utara | 2002   | Health Survey                       | SBH    |
| Sumatera Utara | 2003   | Health Survey                       | SBH    |
| Sumatera Utara | 2004   | Health Survey                       | SBH    |
| Sumatera Utara | 2005   | Health Survey                       | SBH    |
| Sumatera Utara | 2006   | Health Survey                       | SBH    |
| Sumatera Utara | 2007   | Health Survey                       | SBH    |
| Sumatera Utara | 2008   | Health Survey                       | SBH    |
| Sumatera Utara | 2009   | Health Survey                       | SBH    |
| Sumatera Utara | 2010   | Health Survey                       | SBH    |
| Sumatera Utara | 2011   | Health Survey                       | SBH    |
| Sumatera Utara | 2012   | Health Survey                       | SBH    |
| Sumatera Utara | 2013   | Health Survey                       | SBH    |
| Yogyakarta     | 1955   | Census                              | CBH    |
| Yogyakarta     | 1957   | Census                              | CBH    |
| Yogyakarta     | 1958   | Census                              | CBH    |
| Yogyakarta     | 1959   | Census                              | CBH    |
| Yogyakarta     | 1960   | Census                              | CBH    |
| Yogyakarta     | 1961   | Census                              | CBH    |
| Yogyakarta     | 1962   | Census                              | CBH    |
| Yogyakarta     | 1963   | Census                              | CBH    |
| Yogyakarta     | 1964   | Census                              | CBH    |
| Yogyakarta     | 1965   | Census                              | CBH    |
| Yogyakarta     | 1966   | Census                              | CBH    |
| Yogyakarta     | 1967   | Census                              | CBH    |
| Yogyakarta     | 1968   | Census                              | CBH    |
| Yogyakarta     | 1969   | Census                              | CBH    |
| Yogyakarta     | 1970   | Census                              | CBH    |
| Yogyakarta     | 1971   | Census                              | CBH    |
| Yogyakarta     | 1972   | Census                              | CBH    |
| Yogyakarta     | 1973   | Census                              | CBH    |
| Yogyakarta     | 1974   | Census                              | CBH    |
| Yogyakarta     | 1975   | Census                              | CBH    |
| Yogyakarta     | 1976   | Census                              | CBH    |
| Yogyakarta     | 1977   | Census                              | CBH    |
| Yogyakarta     | 1978   | Census                              | CBH    |
| Yogyakarta     | 1979   | Census                              | CBH    |
| Yogyakarta     | 1980   | Census                              | SBH    |
| Yogyakarta     | 1980   | Census                              | CBH    |

**Appendix Table 10. Under-5 mortality reference sources by source date and location, 1950-2016**

| Location   | Source | Source years                        | Method |
|------------|--------|-------------------------------------|--------|
| Yogyakarta | 1981   | Census                              | CBH    |
| Yogyakarta | 1982   | Census                              | CBH    |
| Yogyakarta | 1983   | Census                              | CBH    |
| Yogyakarta | 1984   | Census                              | CBH    |
| Yogyakarta | 1985   | Census                              | CBH    |
| Yogyakarta | 1986   | Census                              | CBH    |
| Yogyakarta | 1987   | Census                              | CBH    |
| Yogyakarta | 1988   | Census                              | CBH    |
| Yogyakarta | 1989   | Census                              | CBH    |
| Yogyakarta | 1990   | Census                              | CBH    |
| Yogyakarta | 1990   | Census                              | SBH    |
| Yogyakarta | 1991   | Census                              | CBH    |
| Yogyakarta | 1992   | Census                              | CBH    |
| Yogyakarta | 1993   | Census                              | CBH    |
| Yogyakarta | 1994   | Census                              | CBH    |
| Yogyakarta | 1995   | Census                              | CBH    |
| Yogyakarta | 1996   | Census                              | CBH    |
| Yogyakarta | 1997   | Census                              | CBH    |
| Yogyakarta | 1998   | Census                              | CBH    |
| Yogyakarta | 1999   | Census                              | CBH    |
| Yogyakarta | 2000   | Census                              | CBH    |
| Yogyakarta | 2000   | Census                              | SBH    |
| Yogyakarta | 2002   | Census                              | CBH    |
| Yogyakarta | 2004   | Census                              | CBH    |
| Yogyakarta | 2010   | Census                              | SBH    |
| Yogyakarta | 1965   | Demographic and Health Survey (DHS) | CBH    |
| Yogyakarta | 1967   | Demographic and Health Survey (DHS) | CBH    |
| Yogyakarta | 1969   | Demographic and Health Survey (DHS) | CBH    |
| Yogyakarta | 1971   | Demographic and Health Survey (DHS) | CBH    |
| Yogyakarta | 1973   | Demographic and Health Survey (DHS) | CBH    |
| Yogyakarta | 1975   | Demographic and Health Survey (DHS) | CBH    |
| Yogyakarta | 1977   | Demographic and Health Survey (DHS) | CBH    |
| Yogyakarta | 1979   | Demographic and Health Survey (DHS) | CBH    |
| Yogyakarta | 1981   | Demographic and Health Survey (DHS) | CBH    |
| Yogyakarta | 1983   | Demographic and Health Survey (DHS) | CBH    |
| Yogyakarta | 1985   | Demographic and Health Survey (DHS) | CBH    |
| Yogyakarta | 1987   | Demographic and Health Survey (DHS) | SBH    |
| Yogyakarta | 1987   | Demographic and Health Survey (DHS) | CBH    |
| Yogyakarta | 1989   | Demographic and Health Survey (DHS) | CBH    |
| Yogyakarta | 1991   | Demographic and Health Survey (DHS) | CBH    |
| Yogyakarta | 1991   | Demographic and Health Survey (DHS) | SBH    |
| Yogyakarta | 1993   | Demographic and Health Survey (DHS) | CBH    |
| Yogyakarta | 1994   | Demographic and Health Survey (DHS) | SBH    |
| Yogyakarta | 1995   | Demographic and Health Survey (DHS) | CBH    |
| Yogyakarta | 1997   | Demographic and Health Survey (DHS) | SBH    |
| Yogyakarta | 1997   | Demographic and Health Survey (DHS) | CBH    |
| Yogyakarta | 1999   | Demographic and Health Survey (DHS) | CBH    |
| Yogyakarta | 2001   | Demographic and Health Survey (DHS) | CBH    |
| Yogyakarta | 2003   | Demographic and Health Survey (DHS) | SBH    |
| Yogyakarta | 2003   | Demographic and Health Survey (DHS) | CBH    |
| Yogyakarta | 2005   | Demographic and Health Survey (DHS) | CBH    |
| Yogyakarta | 2007   | Demographic and Health Survey (DHS) | CBH    |
| Yogyakarta | 2007   | Demographic and Health Survey (DHS) | SBH    |
| Yogyakarta | 2009   | Demographic and Health Survey (DHS) | CBH    |
| Yogyakarta | 2011   | Demographic and Health Survey (DHS) | CBH    |
| Yogyakarta | 2012   | Demographic and Health Survey (DHS) | SBH    |
| Yogyakarta | 1982   | Health Survey                       | CBH    |
| Yogyakarta | 1984   | Health Survey                       | CBH    |
| Yogyakarta | 1985   | Health Survey                       | SBH    |
| Yogyakarta | 1986   | Health Survey                       | CBH    |
| Yogyakarta | 1988   | Health Survey                       | CBH    |
| Yogyakarta | 1990   | Health Survey                       | CBH    |
| Yogyakarta | 1992   | Health Survey                       | SBH    |
| Yogyakarta | 1992   | Health Survey                       | CBH    |
| Yogyakarta | 1993   | Health Survey                       | SBH    |
| Yogyakarta | 1994   | Health Survey                       | CBH    |
| Yogyakarta | 1994   | Health Survey                       | SBH    |



**Appendix Table 10. Under-5 mortality reference sources by source date and location, 1950-2016**

| Location                       | Source    | Source years                             | Method     |
|--------------------------------|-----------|------------------------------------------|------------|
| Yogyakarta                     | 1995      | Health Survey                            | SBH        |
| Yogyakarta                     | 1996      | Health Survey                            | SBH        |
| Yogyakarta                     | 1996      | Health Survey                            | CBH        |
| Yogyakarta                     | 1997      | Health Survey                            | SBH        |
| Yogyakarta                     | 1998      | Health Survey                            | CBH        |
| Yogyakarta                     | 1998      | Health Survey                            | SBH        |
| Yogyakarta                     | 1999      | Health Survey                            | SBH        |
| Yogyakarta                     | 2000      | Health Survey                            | SBH        |
| Yogyakarta                     | 2000      | Health Survey                            | CBH        |
| Yogyakarta                     | 2001      | Health Survey                            | SBH        |
| Yogyakarta                     | 2002      | Health Survey                            | SBH        |
| Yogyakarta                     | 2003      | Health Survey                            | SBH        |
| Yogyakarta                     | 2004      | Health Survey                            | SBH        |
| Yogyakarta                     | 2005      | Health Survey                            | SBH        |
| Yogyakarta                     | 2006      | Health Survey                            | SBH        |
| Yogyakarta                     | 2007      | Health Survey                            | SBH        |
| Yogyakarta                     | 2008      | Health Survey                            | SBH        |
| Yogyakarta                     | 2009      | Health Survey                            | SBH        |
| Yogyakarta                     | 2010      | Health Survey                            | SBH        |
| Yogyakarta                     | 2011      | Health Survey                            | SBH        |
| Yogyakarta                     | 2012      | Health Survey                            | SBH        |
| Yogyakarta                     | 2013      | Health Survey                            | SBH        |
| Laos                           | 2011      | Multiple Indicator Cluster Survey (MICS) | CBH        |
| Malaysia                       | 1952-2012 | Vital Registration                       | VR/SRS/DSP |
| Maldives                       | 1974-2013 | Vital Registration                       | VR/SRS/DSP |
| Mauritius                      | 1950-2014 | Vital Registration                       | VR/SRS/DSP |
| Myanmar                        | 2014      | Census                                   | SBH        |
| Myanmar                        | 1997      | Health Survey                            | SBH        |
| Myanmar                        | 2001      | Health Survey                            | SBH        |
| Myanmar                        | 2007      | Health Survey                            | SBH        |
| Myanmar                        | 2010      | Multiple Indicator Cluster Survey (MICS) | CBH        |
| Philippines                    | 1993      | Demographic and Health Survey (DHS)      | CBH        |
| Philippines                    | 1998      | Demographic and Health Survey (DHS)      | CBH        |
| Philippines                    | 2003      | Demographic and Health Survey (DHS)      | CBH        |
| Philippines                    | 2008      | Demographic and Health Survey (DHS)      | CBH        |
| Philippines                    | 2013      | Demographic and Health Survey (DHS)      | CBH        |
| Sri Lanka                      | 1950-2010 | Vital Registration                       | VR/SRS/DSP |
| Seychelles                     | 1952-2014 | Vital Registration                       | VR/SRS/DSP |
| Thailand                       | 1987      | Demographic and Health Survey (DHS)      | CBH        |
| Timor-Leste                    | 2009      | Demographic and Health Survey (DHS)      | CBH        |
| Vietnam                        | 1997      | Demographic and Health Survey (DHS)      | CBH        |
| Vietnam                        | 2002      | Demographic and Health Survey (DHS)      | CBH        |
| American Samoa                 | 1952-2012 | Vital Registration                       | VR/SRS/DSP |
| Federated States of Micronesia | 2000      | Census                                   | SBH        |
| Federated States of Micronesia | 2003      | Vital Registration                       | VR/SRS/DSP |
| Fiji                           | 2007      | Census                                   | SBH        |
| Fiji                           | 1986      | Census (IPUMS)                           | SBH        |
| Fiji                           | 1996      | Census (IPUMS)                           | SBH        |
| Guam                           | 1950-2012 | Vital Registration                       | VR/SRS/DSP |
| Kiribati                       | 2005      | Census                                   | SBH        |
| Kiribati                       | 2010      | Census                                   | SBH        |
| Kiribati                       | 2009      | Demographic Survey                       | CBH        |
| Kiribati                       | 2009      | Demographic Survey                       | SBH        |
| Marshall Islands               | 1999      | Census                                   | SBH        |
| Marshall Islands               | 2011      | Census                                   | SBH        |
| Marshall Islands               | 2006      | Demographic and Health Survey (DHS)      | CBH        |
| Northern Mariana Islands       | 1998-2012 | Vital Registration                       | VR/SRS/DSP |
| Papua New Guinea               | 2000      | Census                                   | SBH        |
| Papua New Guinea               | 1991      | Demographic and Health Survey (DHS)      | SBH        |
| Papua New Guinea               | 1996      | Demographic and Health Survey (DHS)      | CBH        |
| Papua New Guinea               | 1997      | Demographic and Health Survey (DHS)      | SBH        |
| Papua New Guinea               | 2006      | Demographic and Health Survey (DHS)      | CBH        |
| Samoa                          | 2009      | Demographic Survey                       | CBH        |
| Solomon Islands                | 1999      | Census                                   | SBH        |
| Solomon Islands                | 2009      | Census                                   | SBH        |
| Solomon Islands                | 2006      | Demographic and Health Survey (DHS)      | CBH        |
| Tonga                          | 2012      | National Demographic and Health Survey   | CBH        |

**Appendix Table 10. Under-5 mortality reference sources by source date and location, 1950-2016**

| Location               | Source    | Source years                              | Method     |
|------------------------|-----------|-------------------------------------------|------------|
| Vanuatu                | 2013      | National Demographic and Health Survey    | CBH        |
| Armenia                | 2000      | Demographic and Health Survey (DHS)       | CBH        |
| Armenia                | 2005      | Demographic and Health Survey (DHS)       | CBH        |
| Armenia                | 2010      | Demographic and Health Survey (DHS)       | CBH        |
| Armenia                | 2016      | Demographic and Health Survey (DHS)       | CBH        |
| Azerbaijan             | 2006      | Demographic and Health Survey (DHS)       | CBH        |
| Azerbaijan             | 2011      | National Demographic and Health Survey    | CBH        |
| Georgia                | 2005      | Multiple Indicator Cluster Survey (MICS)  | SBH        |
| Georgia                | 1999      | Reproductive Health Survey (RHS)          | SBH        |
| Georgia                | 1999      | Reproductive Health Survey (RHS)          | CBH        |
| Georgia                | 2005      | Reproductive Health Survey (RHS)          | CBH        |
| Georgia                | 2005      | Reproductive Health Survey (RHS)          | SBH        |
| Georgia                | 2010      | Reproductive Health Survey (RHS)          | CBH        |
| Kazakhstan             | 2006      | Multiple Indicator Cluster Survey (MICS)  | SBH        |
| Kazakhstan             | 2010      | Multiple Indicator Cluster Survey (MICS)  | SBH        |
| Kazakhstan             | 2008-2015 | Vital Registration                        | VR/SRS/DSP |
| Kyrgyzstan             | 1997      | Demographic and Health Survey (DHS)       | CBH        |
| Kyrgyzstan             | 2012      | Demographic and Health Survey (DHS)       | CBH        |
| Mongolia               | 1989      | Census (IPUMS)                            | SBH        |
| Mongolia               | 2000      | Multiple Indicator Cluster Survey (MICS)  | SBH        |
| Mongolia               | 2005      | Multiple Indicator Cluster Survey (MICS)  | SBH        |
| Mongolia               | 2010      | Multiple Indicator Cluster Survey (MICS)  | SBH        |
| Mongolia               | 2013      | Multiple Indicator Cluster Survey (MICS)  | SBH        |
| Mongolia               | 2013      | Multiple Indicator Cluster Survey (MICS)  | CBH        |
| Mongolia               | 1998      | Reproductive Health Survey (RHS)          | CBH        |
| Mongolia               | 1998      | Reproductive Health Survey (RHS)          | SBH        |
| Mongolia               | 2003      | Reproductive Health Survey (RHS)          | SBH        |
| Mongolia               | 2008      | Reproductive Health Survey (RHS)          | SBH        |
| Tajikistan             | 1989      | Census                                    | SBH        |
| Tajikistan             | 2012      | Demographic and Health Survey (DHS)       | SBH        |
| Tajikistan             | 2012      | Demographic and Health Survey (DHS)       | CBH        |
| Tajikistan             | 2010      | Health Survey                             | CBH        |
| Tajikistan             | 1999      | Living Standards Measurement Study (LSMS) | SBH        |
| Tajikistan             | 2003      | Living Standards Measurement Study (LSMS) | SBH        |
| Tajikistan             | 2007      | Living Standards Measurement Study (LSMS) | SBH        |
| Tajikistan             | 2000      | Multiple Indicator Cluster Survey (MICS)  | SBH        |
| Tajikistan             | 2005      | Multiple Indicator Cluster Survey (MICS)  | SBH        |
| Turkmenistan           | 2000      | Demographic and Health Survey (DHS)       | CBH        |
| Uzbekistan             | 1996      | Demographic and Health Survey (DHS)       | CBH        |
| Albania                | 2008      | Demographic and Health Survey (DHS)       | CBH        |
| Bosnia and Herzegovina | 1985-2014 | Vital Registration                        | VR/SRS/DSP |
| Bulgaria               | 1950-2013 | Vital Registration                        | VR/SRS/DSP |
| Croatia                | 1985-2013 | Vital Registration                        | VR/SRS/DSP |
| Czech Republic         | 1950-2015 | Vital Registration                        | VR/SRS/DSP |
| Hungary                | 1950-2015 | Vital Registration                        | VR/SRS/DSP |
| Macedonia              | 1982-2013 | Vital Registration                        | VR/SRS/DSP |
| Montenegro             | 1995-2013 | Vital Registration                        | VR/SRS/DSP |
| Poland                 | 1950-2014 | Vital Registration                        | VR/SRS/DSP |
| Romania                | 1956-2015 | Vital Registration                        | VR/SRS/DSP |
| Serbia                 | 1995-2014 | Vital Registration                        | VR/SRS/DSP |
| Slovakia               | 1950-2014 | Vital Registration                        | VR/SRS/DSP |
| Slovenia               | 1982-2015 | Vital Registration                        | VR/SRS/DSP |
| Belarus                | 1989      | Census                                    | SBH        |
| Belarus                | 2005      | Multiple Indicator Cluster Survey (MICS)  | SBH        |
| Estonia                | 1959-2014 | Vital Registration                        | VR/SRS/DSP |
| Latvia                 | 1959-2014 | Vital Registration                        | VR/SRS/DSP |
| Lithuania              | 1959-2015 | Vital Registration                        | VR/SRS/DSP |
| Moldova                | 2005      | Demographic and Health Survey (DHS)       | CBH        |
| Russia                 | 1959-2014 | Vital Registration                        | VR/SRS/DSP |
| Ukraine                | 2007      | Demographic and Health Survey (DHS)       | CBH        |
| Brunei                 | 1950-2014 | Vital Registration                        | VR/SRS/DSP |
| Japan                  | 1950-2014 | Vital Registration                        | VR/SRS/DSP |
| Aichi                  | 1979-2013 | Vital Registration                        | VR/SRS/DSP |
| Akita                  | 1979-2013 | Vital Registration                        | VR/SRS/DSP |
| Aomori                 | 1979-2013 | Vital Registration                        | VR/SRS/DSP |
| Chiba                  | 1979-2013 | Vital Registration                        | VR/SRS/DSP |
| Ehime                  | 1979-2013 | Vital Registration                        | VR/SRS/DSP |

**Appendix Table 10. Under-5 mortality reference sources by source date and location, 1950-2016**

| Location    | Source    | Source years       | Method     |
|-------------|-----------|--------------------|------------|
| Fukui       | 1979-2013 | Vital Registration | VR/SRS/DSP |
| Fukuoka     | 1979-2013 | Vital Registration | VR/SRS/DSP |
| Fukushima   | 1979-2013 | Vital Registration | VR/SRS/DSP |
| Gifu        | 1979-2013 | Vital Registration | VR/SRS/DSP |
| Gunma       | 1979-2013 | Vital Registration | VR/SRS/DSP |
| Hiroshima   | 1979-2013 | Vital Registration | VR/SRS/DSP |
| Hokkaido    | 1979-2013 | Vital Registration | VR/SRS/DSP |
| Hyogo       | 1979-2013 | Vital Registration | VR/SRS/DSP |
| Ibaraki     | 1979-2013 | Vital Registration | VR/SRS/DSP |
| Ishikawa    | 1979-2013 | Vital Registration | VR/SRS/DSP |
| Iwate       | 1979-2013 | Vital Registration | VR/SRS/DSP |
| Kagawa      | 1979-2013 | Vital Registration | VR/SRS/DSP |
| Kagoshima   | 1979-2013 | Vital Registration | VR/SRS/DSP |
| Kanagawa    | 1979-2013 | Vital Registration | VR/SRS/DSP |
| Kochi       | 1979-2013 | Vital Registration | VR/SRS/DSP |
| Kumamoto    | 1979-2013 | Vital Registration | VR/SRS/DSP |
| Kyoto       | 1979-2013 | Vital Registration | VR/SRS/DSP |
| Mie         | 1979-2013 | Vital Registration | VR/SRS/DSP |
| Miyagi      | 1979-2013 | Vital Registration | VR/SRS/DSP |
| Miyazaki    | 1979-2013 | Vital Registration | VR/SRS/DSP |
| Nagano      | 1979-2013 | Vital Registration | VR/SRS/DSP |
| Nagasaki    | 1979-2013 | Vital Registration | VR/SRS/DSP |
| Nara        | 1979-2013 | Vital Registration | VR/SRS/DSP |
| Niigata     | 1979-2013 | Vital Registration | VR/SRS/DSP |
| Oita        | 1979-2013 | Vital Registration | VR/SRS/DSP |
| Okayama     | 1979-2013 | Vital Registration | VR/SRS/DSP |
| Okinawa     | 1979-2013 | Vital Registration | VR/SRS/DSP |
| Osaka       | 1979-2013 | Vital Registration | VR/SRS/DSP |
| Saga        | 1979-2013 | Vital Registration | VR/SRS/DSP |
| Saitama     | 1979-2013 | Vital Registration | VR/SRS/DSP |
| Shiga       | 1979-2013 | Vital Registration | VR/SRS/DSP |
| Shimane     | 1979-2013 | Vital Registration | VR/SRS/DSP |
| Shizuoka    | 1979-2013 | Vital Registration | VR/SRS/DSP |
| Tochigi     | 1979-2013 | Vital Registration | VR/SRS/DSP |
| Tokushima   | 1979-2013 | Vital Registration | VR/SRS/DSP |
| Tokyo       | 1979-2013 | Vital Registration | VR/SRS/DSP |
| Tottori     | 1979-2013 | Vital Registration | VR/SRS/DSP |
| Toyama      | 1979-2013 | Vital Registration | VR/SRS/DSP |
| Wakayama    | 1979-2013 | Vital Registration | VR/SRS/DSP |
| Yamagata    | 1979-2013 | Vital Registration | VR/SRS/DSP |
| Yamaguchi   | 1979-2013 | Vital Registration | VR/SRS/DSP |
| Yamanashi   | 1979-2013 | Vital Registration | VR/SRS/DSP |
| South Korea | 1999-2013 | Vital Registration | VR/SRS/DSP |
| Singapore   | 1950-2015 | Vital Registration | VR/SRS/DSP |
| Australia   | 1950-2014 | Vital Registration | VR/SRS/DSP |
| New Zealand | 1950-2014 | Vital Registration | VR/SRS/DSP |
| Andorra     | 1950-2012 | Vital Registration | VR/SRS/DSP |
| Austria     | 1950-2014 | Vital Registration | VR/SRS/DSP |
| Belgium     | 1950-2014 | Vital Registration | VR/SRS/DSP |
| Cyprus      | 1974-2014 | Vital Registration | VR/SRS/DSP |
| Denmark     | 1950-2014 | Vital Registration | VR/SRS/DSP |
| Finland     | 1950-2015 | Vital Registration | VR/SRS/DSP |
| France      | 1950-2014 | Vital Registration | VR/SRS/DSP |
| Germany     | 1956-2014 | Vital Registration | VR/SRS/DSP |
| Greece      | 1951-2014 | Vital Registration | VR/SRS/DSP |
| Iceland     | 1950-2015 | Vital Registration | VR/SRS/DSP |
| Ireland     | 1950-2014 | Vital Registration | VR/SRS/DSP |
| Israel      | 1950-2014 | Vital Registration | VR/SRS/DSP |
| Italy       | 1950-2013 | Vital Registration | VR/SRS/DSP |
| Luxembourg  | 1950-2014 | Vital Registration | VR/SRS/DSP |
| Malta       | 1950-2014 | Vital Registration | VR/SRS/DSP |
| Netherlands | 1950-2015 | Vital Registration | VR/SRS/DSP |
| Norway      | 1950-2014 | Vital Registration | VR/SRS/DSP |
| Portugal    | 1950-2014 | Vital Registration | VR/SRS/DSP |
| Spain       | 1950-2014 | Vital Registration | VR/SRS/DSP |
| Sweden      | 1950-2014 | Vital Registration | VR/SRS/DSP |
| Stockholm   | 1980-2010 | Vital Registration | VR/SRS/DSP |

**Appendix Table 10. Under-5 mortality reference sources by source date and location, 1950-2016**

| Location                | Source    | Source years       | Method     |
|-------------------------|-----------|--------------------|------------|
| Sweden except Stockholm | 1980-2010 | Vital Registration | VR/SRS/DSP |
| Switzerland             | 1950-2014 | Vital Registration | VR/SRS/DSP |
| United Kingdom          | 1950-2013 | Vital Registration | VR/SRS/DSP |
| England                 | 1981-2015 | Vital Registration | VR/SRS/DSP |
| East Midlands           | 1981-2015 | Vital Registration | VR/SRS/DSP |
| Derby                   | 1981-2015 | Vital Registration | VR/SRS/DSP |
| Derbyshire              | 1981-2015 | Vital Registration | VR/SRS/DSP |
| Leicester               | 1981-2015 | Vital Registration | VR/SRS/DSP |
| Leicestershire          | 1981-2015 | Vital Registration | VR/SRS/DSP |
| Lincolnshire            | 1981-2015 | Vital Registration | VR/SRS/DSP |
| Northamptonshire        | 1981-2015 | Vital Registration | VR/SRS/DSP |
| Nottingham              | 1981-2015 | Vital Registration | VR/SRS/DSP |
| Nottinghamshire         | 1981-2015 | Vital Registration | VR/SRS/DSP |
| Rutland                 | 1981-2015 | Vital Registration | VR/SRS/DSP |
| East of England         | 1981-2015 | Vital Registration | VR/SRS/DSP |
| Bedford                 | 1981-2015 | Vital Registration | VR/SRS/DSP |
| Cambridgeshire          | 1981-2015 | Vital Registration | VR/SRS/DSP |
| Central Bedfordshire    | 1981-2015 | Vital Registration | VR/SRS/DSP |
| Essex                   | 1981-2015 | Vital Registration | VR/SRS/DSP |
| Hertfordshire           | 1981-2015 | Vital Registration | VR/SRS/DSP |
| Luton                   | 1981-2015 | Vital Registration | VR/SRS/DSP |
| Norfolk                 | 1981-2015 | Vital Registration | VR/SRS/DSP |
| Peterborough            | 1981-2015 | Vital Registration | VR/SRS/DSP |
| Southend-on-Sea         | 1981-2015 | Vital Registration | VR/SRS/DSP |
| Suffolk                 | 1981-2015 | Vital Registration | VR/SRS/DSP |
| Thurrock                | 1981-2015 | Vital Registration | VR/SRS/DSP |
| Greater London          | 1981-2015 | Vital Registration | VR/SRS/DSP |
| Barking and Dagenham    | 1981-2015 | Vital Registration | VR/SRS/DSP |
| Barnet                  | 1981-2015 | Vital Registration | VR/SRS/DSP |
| Bexley                  | 1981-2015 | Vital Registration | VR/SRS/DSP |
| Brent                   | 1981-2015 | Vital Registration | VR/SRS/DSP |
| Bromley                 | 1981-2015 | Vital Registration | VR/SRS/DSP |
| Camden                  | 1981-2015 | Vital Registration | VR/SRS/DSP |
| Croydon                 | 1981-2015 | Vital Registration | VR/SRS/DSP |
| Ealing                  | 1981-2015 | Vital Registration | VR/SRS/DSP |
| Enfield                 | 1981-2015 | Vital Registration | VR/SRS/DSP |
| Greenwich               | 1981-2015 | Vital Registration | VR/SRS/DSP |
| Hackney                 | 1981-2015 | Vital Registration | VR/SRS/DSP |
| Hammersmith and Fulham  | 1981-2015 | Vital Registration | VR/SRS/DSP |
| Haringey                | 1981-2015 | Vital Registration | VR/SRS/DSP |
| Harrow                  | 1981-2015 | Vital Registration | VR/SRS/DSP |
| Havering                | 1981-2015 | Vital Registration | VR/SRS/DSP |
| Hillingdon              | 1981-2015 | Vital Registration | VR/SRS/DSP |
| Hounslow                | 1981-2015 | Vital Registration | VR/SRS/DSP |
| Islington               | 1981-2015 | Vital Registration | VR/SRS/DSP |
| Kensington and Chelsea  | 1981-2015 | Vital Registration | VR/SRS/DSP |
| Kingston upon Thames    | 1981-2015 | Vital Registration | VR/SRS/DSP |
| Lambeth                 | 1981-2015 | Vital Registration | VR/SRS/DSP |
| Lewisham                | 1981-2015 | Vital Registration | VR/SRS/DSP |
| Merton                  | 1981-2015 | Vital Registration | VR/SRS/DSP |
| Newham                  | 1981-2015 | Vital Registration | VR/SRS/DSP |
| Redbridge               | 1981-2015 | Vital Registration | VR/SRS/DSP |
| Richmond upon Thames    | 1981-2015 | Vital Registration | VR/SRS/DSP |
| Southwark               | 1981-2015 | Vital Registration | VR/SRS/DSP |
| Sutton                  | 1981-2015 | Vital Registration | VR/SRS/DSP |
| Tower Hamlets           | 1981-2015 | Vital Registration | VR/SRS/DSP |
| Waltham Forest          | 1981-2015 | Vital Registration | VR/SRS/DSP |
| Wandsworth              | 1981-2015 | Vital Registration | VR/SRS/DSP |
| Westminster             | 1981-2015 | Vital Registration | VR/SRS/DSP |
| North East England      | 1981-2015 | Vital Registration | VR/SRS/DSP |
| County Durham           | 1981-2015 | Vital Registration | VR/SRS/DSP |
| Darlington              | 1981-2015 | Vital Registration | VR/SRS/DSP |
| Gateshead               | 1981-2015 | Vital Registration | VR/SRS/DSP |
| Hartlepool              | 1981-2015 | Vital Registration | VR/SRS/DSP |
| Middlesbrough           | 1981-2015 | Vital Registration | VR/SRS/DSP |
| Newcastle upon Tyne     | 1981-2015 | Vital Registration | VR/SRS/DSP |
| North Tyneside          | 1981-2015 | Vital Registration | VR/SRS/DSP |

**Appendix Table 10. Under-5 mortality reference sources by source date and location, 1950-2016**

| Location                     | Source    | Source years       | Method     |
|------------------------------|-----------|--------------------|------------|
| Northumberland               | 1981-2015 | Vital Registration | VR/SRS/DSP |
| Redcar and Cleveland         | 1981-2015 | Vital Registration | VR/SRS/DSP |
| South Tyneside               | 1981-2015 | Vital Registration | VR/SRS/DSP |
| Stockton-on-Tees             | 1981-2015 | Vital Registration | VR/SRS/DSP |
| Sunderland                   | 1981-2015 | Vital Registration | VR/SRS/DSP |
| North West England           | 1981-2015 | Vital Registration | VR/SRS/DSP |
| Blackburn with Darwen        | 1981-2015 | Vital Registration | VR/SRS/DSP |
| Blackpool                    | 1981-2015 | Vital Registration | VR/SRS/DSP |
| Bolton                       | 1981-2015 | Vital Registration | VR/SRS/DSP |
| Bury                         | 1981-2015 | Vital Registration | VR/SRS/DSP |
| Cheshire East                | 1981-2015 | Vital Registration | VR/SRS/DSP |
| Cheshire West and Chester    | 1981-2015 | Vital Registration | VR/SRS/DSP |
| Cumbria                      | 1981-2015 | Vital Registration | VR/SRS/DSP |
| Halton                       | 1981-2015 | Vital Registration | VR/SRS/DSP |
| Knowsley                     | 1981-2015 | Vital Registration | VR/SRS/DSP |
| Lancashire                   | 1981-2015 | Vital Registration | VR/SRS/DSP |
| Liverpool                    | 1981-2015 | Vital Registration | VR/SRS/DSP |
| Manchester                   | 1981-2015 | Vital Registration | VR/SRS/DSP |
| Oldham                       | 1981-2015 | Vital Registration | VR/SRS/DSP |
| Rochdale                     | 1981-2015 | Vital Registration | VR/SRS/DSP |
| Salford                      | 1981-2015 | Vital Registration | VR/SRS/DSP |
| Sefton                       | 1981-2015 | Vital Registration | VR/SRS/DSP |
| St Helens                    | 1981-2015 | Vital Registration | VR/SRS/DSP |
| Stockport                    | 1981-2015 | Vital Registration | VR/SRS/DSP |
| Tameside                     | 1981-2015 | Vital Registration | VR/SRS/DSP |
| Trafford                     | 1981-2015 | Vital Registration | VR/SRS/DSP |
| Warrington                   | 1981-2015 | Vital Registration | VR/SRS/DSP |
| Wigan                        | 1981-2015 | Vital Registration | VR/SRS/DSP |
| Wirral                       | 1981-2015 | Vital Registration | VR/SRS/DSP |
| South East England           | 1981-2015 | Vital Registration | VR/SRS/DSP |
| Bracknell Forest             | 1981-2015 | Vital Registration | VR/SRS/DSP |
| Brighton and Hove            | 1981-2015 | Vital Registration | VR/SRS/DSP |
| Buckinghamshire              | 1981-2015 | Vital Registration | VR/SRS/DSP |
| East Sussex                  | 1981-2015 | Vital Registration | VR/SRS/DSP |
| Hampshire                    | 1981-2015 | Vital Registration | VR/SRS/DSP |
| Isle of Wight                | 1981-2015 | Vital Registration | VR/SRS/DSP |
| Kent                         | 1981-2015 | Vital Registration | VR/SRS/DSP |
| Medway                       | 1981-2015 | Vital Registration | VR/SRS/DSP |
| Milton Keynes                | 1981-2015 | Vital Registration | VR/SRS/DSP |
| Oxfordshire                  | 1981-2015 | Vital Registration | VR/SRS/DSP |
| Portsmouth                   | 1981-2015 | Vital Registration | VR/SRS/DSP |
| Reading                      | 1981-2015 | Vital Registration | VR/SRS/DSP |
| Slough                       | 1981-2015 | Vital Registration | VR/SRS/DSP |
| Southampton                  | 1981-2015 | Vital Registration | VR/SRS/DSP |
| Surrey                       | 1981-2015 | Vital Registration | VR/SRS/DSP |
| West Berkshire               | 1981-2015 | Vital Registration | VR/SRS/DSP |
| West Sussex                  | 1981-2015 | Vital Registration | VR/SRS/DSP |
| Windsor and Maidenhead       | 1981-2015 | Vital Registration | VR/SRS/DSP |
| Wokingham                    | 1981-2015 | Vital Registration | VR/SRS/DSP |
| South West England           | 1981-2015 | Vital Registration | VR/SRS/DSP |
| Bath and North East Somerset | 1981-2015 | Vital Registration | VR/SRS/DSP |
| Bournemouth                  | 1981-2015 | Vital Registration | VR/SRS/DSP |
| Bristol, City of             | 1981-2015 | Vital Registration | VR/SRS/DSP |
| Cornwall                     | 1981-2015 | Vital Registration | VR/SRS/DSP |
| Devon                        | 1981-2015 | Vital Registration | VR/SRS/DSP |
| Dorset                       | 1981-2015 | Vital Registration | VR/SRS/DSP |
| Gloucestershire              | 1981-2015 | Vital Registration | VR/SRS/DSP |
| North Somerset               | 1981-2015 | Vital Registration | VR/SRS/DSP |
| Plymouth                     | 1981-2015 | Vital Registration | VR/SRS/DSP |
| Poole                        | 1981-2015 | Vital Registration | VR/SRS/DSP |
| Somerset                     | 1981-2015 | Vital Registration | VR/SRS/DSP |
| South Gloucestershire        | 1981-2015 | Vital Registration | VR/SRS/DSP |
| Swindon                      | 1981-2015 | Vital Registration | VR/SRS/DSP |
| Torbay                       | 1981-2015 | Vital Registration | VR/SRS/DSP |
| Wiltshire                    | 1981-2015 | Vital Registration | VR/SRS/DSP |
| West Midlands                | 1981-2015 | Vital Registration | VR/SRS/DSP |
| Birmingham                   | 1981-2015 | Vital Registration | VR/SRS/DSP |

**Appendix Table 10. Under-5 mortality reference sources by source date and location, 1950-2016**

| Location                    | Source    | Source years       | Method     |
|-----------------------------|-----------|--------------------|------------|
| Coventry                    | 1981-2015 | Vital Registration | VR/SRS/DSP |
| Dudley                      | 1981-2015 | Vital Registration | VR/SRS/DSP |
| Herefordshire, County of    | 1981-2015 | Vital Registration | VR/SRS/DSP |
| Sandwell                    | 1981-2015 | Vital Registration | VR/SRS/DSP |
| Shropshire                  | 1981-2015 | Vital Registration | VR/SRS/DSP |
| Solihull                    | 1981-2015 | Vital Registration | VR/SRS/DSP |
| Staffordshire               | 1981-2015 | Vital Registration | VR/SRS/DSP |
| Stoke-on-Trent              | 1981-2015 | Vital Registration | VR/SRS/DSP |
| Telford and Wrekin          | 1981-2015 | Vital Registration | VR/SRS/DSP |
| Walsall                     | 1981-2015 | Vital Registration | VR/SRS/DSP |
| Warwickshire                | 1981-2015 | Vital Registration | VR/SRS/DSP |
| Wolverhampton               | 1981-2015 | Vital Registration | VR/SRS/DSP |
| Worcestershire              | 1981-2015 | Vital Registration | VR/SRS/DSP |
| Yorkshire and the Humber    | 1981-2015 | Vital Registration | VR/SRS/DSP |
| Barnsley                    | 1981-2015 | Vital Registration | VR/SRS/DSP |
| Bradford                    | 1981-2015 | Vital Registration | VR/SRS/DSP |
| Calderdale                  | 1981-2015 | Vital Registration | VR/SRS/DSP |
| Doncaster                   | 1981-2015 | Vital Registration | VR/SRS/DSP |
| East Riding of Yorkshire    | 1981-2015 | Vital Registration | VR/SRS/DSP |
| Kingston upon Hull, City of | 1981-2015 | Vital Registration | VR/SRS/DSP |
| Kirklees                    | 1981-2015 | Vital Registration | VR/SRS/DSP |
| Leeds                       | 1981-2015 | Vital Registration | VR/SRS/DSP |
| North East Lincolnshire     | 1981-2015 | Vital Registration | VR/SRS/DSP |
| North Lincolnshire          | 1981-2015 | Vital Registration | VR/SRS/DSP |
| North Yorkshire             | 1981-2015 | Vital Registration | VR/SRS/DSP |
| Rotherham                   | 1981-2015 | Vital Registration | VR/SRS/DSP |
| Sheffield                   | 1981-2015 | Vital Registration | VR/SRS/DSP |
| Wakefield                   | 1981-2015 | Vital Registration | VR/SRS/DSP |
| York                        | 1981-2015 | Vital Registration | VR/SRS/DSP |
| Northern Ireland            | 1950-2013 | Vital Registration | VR/SRS/DSP |
| Scotland                    | 1950-2014 | Vital Registration | VR/SRS/DSP |
| Wales                       | 1981-2013 | Vital Registration | VR/SRS/DSP |
| Argentina                   | 1950-2014 | Vital Registration | VR/SRS/DSP |
| Chile                       | 1950-2014 | Vital Registration | VR/SRS/DSP |
| Uruguay                     | 1950-2014 | Vital Registration | VR/SRS/DSP |
| Canada                      | 1950-2016 | Vital Registration | VR/SRS/DSP |
| Greenland                   | 1952-2014 | Vital Registration | VR/SRS/DSP |
| United States               | 1950-2015 | Vital Registration | VR/SRS/DSP |
| Alabama                     | 1968-2014 | Vital Registration | VR/SRS/DSP |
| Alaska                      | 1968-2014 | Vital Registration | VR/SRS/DSP |
| Arizona                     | 1968-2014 | Vital Registration | VR/SRS/DSP |
| Arkansas                    | 1968-2014 | Vital Registration | VR/SRS/DSP |
| California                  | 1968-2014 | Vital Registration | VR/SRS/DSP |
| Colorado                    | 1968-2014 | Vital Registration | VR/SRS/DSP |
| Connecticut                 | 1968-2014 | Vital Registration | VR/SRS/DSP |
| Delaware                    | 1968-2014 | Vital Registration | VR/SRS/DSP |
| District of Columbia        | 1968-2014 | Vital Registration | VR/SRS/DSP |
| Florida                     | 1968-2014 | Vital Registration | VR/SRS/DSP |
| Georgia                     | 1968-2014 | Vital Registration | VR/SRS/DSP |
| Hawaii                      | 1968-2014 | Vital Registration | VR/SRS/DSP |
| Idaho                       | 1968-2014 | Vital Registration | VR/SRS/DSP |
| Illinois                    | 1968-2014 | Vital Registration | VR/SRS/DSP |
| Indiana                     | 1968-2014 | Vital Registration | VR/SRS/DSP |
| Iowa                        | 1968-2014 | Vital Registration | VR/SRS/DSP |
| Kansas                      | 1968-2014 | Vital Registration | VR/SRS/DSP |
| Kentucky                    | 1968-2014 | Vital Registration | VR/SRS/DSP |
| Louisiana                   | 1968-2014 | Vital Registration | VR/SRS/DSP |
| Maine                       | 1968-2014 | Vital Registration | VR/SRS/DSP |
| Maryland                    | 1968-2014 | Vital Registration | VR/SRS/DSP |
| Massachusetts               | 1968-2014 | Vital Registration | VR/SRS/DSP |
| Michigan                    | 1968-2014 | Vital Registration | VR/SRS/DSP |
| Minnesota                   | 1968-2014 | Vital Registration | VR/SRS/DSP |
| Mississippi                 | 1968-2014 | Vital Registration | VR/SRS/DSP |
| Missouri                    | 1968-2014 | Vital Registration | VR/SRS/DSP |
| Montana                     | 1968-2014 | Vital Registration | VR/SRS/DSP |
| Nebraska                    | 1968-2014 | Vital Registration | VR/SRS/DSP |
| Nevada                      | 1968-2014 | Vital Registration | VR/SRS/DSP |

**Appendix Table 10. Under-5 mortality reference sources by source date and location, 1950-2016**

| Location                         | Source    | Source years                             | Method     |
|----------------------------------|-----------|------------------------------------------|------------|
| New Hampshire                    | 1968-2014 | Vital Registration                       | VR/SRS/DSP |
| New Jersey                       | 1968-2014 | Vital Registration                       | VR/SRS/DSP |
| New Mexico                       | 1968-2014 | Vital Registration                       | VR/SRS/DSP |
| New York                         | 1968-2014 | Vital Registration                       | VR/SRS/DSP |
| North Carolina                   | 1968-2014 | Vital Registration                       | VR/SRS/DSP |
| North Dakota                     | 1968-2014 | Vital Registration                       | VR/SRS/DSP |
| Ohio                             | 1968-2014 | Vital Registration                       | VR/SRS/DSP |
| Oklahoma                         | 1968-2014 | Vital Registration                       | VR/SRS/DSP |
| Oregon                           | 1968-2014 | Vital Registration                       | VR/SRS/DSP |
| Pennsylvania                     | 1968-2014 | Vital Registration                       | VR/SRS/DSP |
| Rhode Island                     | 1968-2014 | Vital Registration                       | VR/SRS/DSP |
| South Carolina                   | 1968-2014 | Vital Registration                       | VR/SRS/DSP |
| South Dakota                     | 1968-2014 | Vital Registration                       | VR/SRS/DSP |
| Tennessee                        | 1968-2014 | Vital Registration                       | VR/SRS/DSP |
| Texas                            | 1968-2014 | Vital Registration                       | VR/SRS/DSP |
| Utah                             | 1968-2014 | Vital Registration                       | VR/SRS/DSP |
| Vermont                          | 1968-2014 | Vital Registration                       | VR/SRS/DSP |
| Virginia                         | 1968-2014 | Vital Registration                       | VR/SRS/DSP |
| Washington                       | 1968-2014 | Vital Registration                       | VR/SRS/DSP |
| West Virginia                    | 1968-2014 | Vital Registration                       | VR/SRS/DSP |
| Wisconsin                        | 1968-2014 | Vital Registration                       | VR/SRS/DSP |
| Wyoming                          | 1968-2014 | Vital Registration                       | VR/SRS/DSP |
| Antigua and Barbuda              | 1950-2014 | Vital Registration                       | VR/SRS/DSP |
| The Bahamas                      | 1965-2013 | Vital Registration                       | VR/SRS/DSP |
| Barbados                         | 1950-2013 | Vital Registration                       | VR/SRS/DSP |
| Belize                           | 1991      | Census                                   | SBH        |
| Belize                           | 2000      | Census                                   | SBH        |
| Belize                           | 2006      | Multiple Indicator Cluster Survey (MICS) | SBH        |
| Belize                           | 2011      | Multiple Indicator Cluster Survey (MICS) | SBH        |
| Belize                           | 1991      | Reproductive Health Survey (RHS)         | CBH        |
| Belize                           | 1991      | Reproductive Health Survey (RHS)         | SBH        |
| Belize                           | 1999      | Reproductive Health Survey (RHS)         | CBH        |
| Belize                           | 1999      | Reproductive Health Survey (RHS)         | SBH        |
| Bermuda                          | 1950-2015 | Vital Registration                       | VR/SRS/DSP |
| Cuba                             | 1959-2014 | Vital Registration                       | VR/SRS/DSP |
| Dominica                         | 1950-2014 | Vital Registration                       | VR/SRS/DSP |
| Dominican Republic               | 1986      | Demographic and Health Survey (DHS)      | CBH        |
| Dominican Republic               | 1991      | Demographic and Health Survey (DHS)      | CBH        |
| Dominican Republic               | 1996      | Demographic and Health Survey (DHS)      | CBH        |
| Dominican Republic               | 2002      | Demographic and Health Survey (DHS)      | CBH        |
| Dominican Republic               | 2007      | Demographic and Health Survey (DHS)      | CBH        |
| Dominican Republic               | 2013      | Demographic and Health Survey (DHS)      | CBH        |
| Grenada                          | 1950-2015 | Vital Registration                       | VR/SRS/DSP |
| Guyana                           | 2009      | Demographic and Health Survey (DHS)      | CBH        |
| Haiti                            | 1994      | Demographic and Health Survey (DHS)      | CBH        |
| Haiti                            | 2000      | Demographic and Health Survey (DHS)      | CBH        |
| Haiti                            | 2005      | Demographic and Health Survey (DHS)      | CBH        |
| Haiti                            | 2012      | Demographic and Health Survey (DHS)      | CBH        |
| Jamaica                          | 1982      | Census (IPUMS)                           | SBH        |
| Jamaica                          | 2001      | Census (IPUMS)                           | SBH        |
| Jamaica                          | 1999      | Multiple Indicator Cluster Survey (MICS) | SBH        |
| Jamaica                          | 2005      | Multiple Indicator Cluster Survey (MICS) | SBH        |
| Jamaica                          | 2008      | Reproductive Health Survey (RHS)         | CBH        |
| Puerto Rico                      | 1950-2014 | Vital Registration                       | VR/SRS/DSP |
| Saint Lucia                      | 1950-2014 | Vital Registration                       | VR/SRS/DSP |
| Saint Vincent and the Grenadines | 1950-2015 | Vital Registration                       | VR/SRS/DSP |
| Suriname                         | 1999      | Multiple Indicator Cluster Survey (MICS) | SBH        |
| Suriname                         | 2006      | Multiple Indicator Cluster Survey (MICS) | SBH        |
| Trinidad and Tobago              | 1987      | Demographic and Health Survey (DHS)      | CBH        |
| Virgin Islands, U.S.             | 1950-2012 | Vital Registration                       | VR/SRS/DSP |
| Bolivia                          | 1989      | Demographic and Health Survey (DHS)      | CBH        |
| Bolivia                          | 1993      | Demographic and Health Survey (DHS)      | CBH        |
| Bolivia                          | 1998      | Demographic and Health Survey (DHS)      | CBH        |
| Bolivia                          | 2003      | Demographic and Health Survey (DHS)      | CBH        |
| Bolivia                          | 2008      | Demographic and Health Survey (DHS)      | CBH        |
| Ecuador                          | 1987      | Demographic and Health Survey (DHS)      | CBH        |
| Ecuador                          | 1989      | Reproductive Health Survey (RHS)         | CBH        |

**Appendix Table 10. Under-5 mortality reference sources by source date and location, 1950-2016**

| Location            | Source    | Source years                                           | Method     |
|---------------------|-----------|--------------------------------------------------------|------------|
| Ecuador             | 1994      | Reproductive Health Survey (RHS)                       | CBH        |
| Ecuador             | 1999      | Reproductive Health Survey (RHS)                       | CBH        |
| Ecuador             | 2004      | Reproductive Health Survey (RHS)                       | CBH        |
| Peru                | 1986      | Demographic and Health Survey (DHS)                    | CBH        |
| Peru                | 1991      | Demographic and Health Survey (DHS)                    | CBH        |
| Peru                | 1996      | Demographic and Health Survey (DHS)                    | CBH        |
| Peru                | 2000      | Demographic and Health Survey (DHS)                    | CBH        |
| Peru                | 2003      | Demographic and Health Survey (DHS)                    | CBH        |
| Peru                | 2004      | Demographic and Health Survey (DHS)                    | CBH        |
| Peru                | 2009      | Demographic and Health Survey (DHS)                    | CBH        |
| Peru                | 2010      | Demographic and Health Survey (DHS)                    | CBH        |
| Peru                | 2011      | Demographic and Health Survey (DHS)                    | CBH        |
| Peru                | 2012      | Demographic and Health Survey (DHS)                    | CBH        |
| Peru                | 2013      | Demographic and Health Survey (DHS)                    | CBH        |
| Peru                | 2014      | Demographic and Health Survey (DHS)                    | CBH        |
| Colombia            | 1986      | Demographic and Health Survey (DHS)                    | CBH        |
| Colombia            | 1990      | Demographic and Health Survey (DHS)                    | CBH        |
| Colombia            | 1995      | Demographic and Health Survey (DHS)                    | CBH        |
| Colombia            | 2000      | Demographic and Health Survey (DHS)                    | CBH        |
| Colombia            | 2004      | Demographic and Health Survey (DHS)                    | CBH        |
| Colombia            | 2009      | Demographic and Health Survey (DHS)                    | CBH        |
| Costa Rica          | 1973      | Census (IPUMS)                                         | SBH        |
| Costa Rica          | 1984      | Census (IPUMS)                                         | SBH        |
| Costa Rica          | 2000      | Census (IPUMS)                                         | SBH        |
| Costa Rica          | 1986      | Reproductive Health Survey (RHS)                       | SBH        |
| Costa Rica          | 1986      | Reproductive Health Survey (RHS)                       | CBH        |
| Costa Rica          | 1992      | Reproductive Health Survey (RHS)                       | CBH        |
| Costa Rica          | 1992      | Reproductive Health Survey (RHS)                       | SBH        |
| El Salvador         | 1985      | Demographic and Health Survey (DHS)                    | CBH        |
| Guatemala           | 1987      | Demographic and Health Survey (DHS)                    | CBH        |
| Guatemala           | 1995      | Demographic and Health Survey (DHS)                    | CBH        |
| Guatemala           | 1998      | Demographic and Health Survey (DHS)                    | CBH        |
| Guatemala           | 2014      | Demographic and Health Survey (DHS)                    | CBH        |
| Guatemala           | 2002      | Reproductive Health Survey (RHS)                       | CBH        |
| Guatemala           | 2008      | Reproductive Health Survey (RHS)                       | CBH        |
| Honduras            | 2005      | Demographic and Health Survey (DHS)                    | CBH        |
| Honduras            | 2011      | Demographic and Health Survey (DHS)                    | CBH        |
| Mexico              | 1987      | Demographic and Health Survey (DHS)                    | CBH        |
| Aguascalientes      | 1990      | Census                                                 | SBH        |
| Aguascalientes      | 2005      | Census                                                 | SBH        |
| Aguascalientes      | 2010      | Census                                                 | SBH        |
| Aguascalientes      | 2015      | Census                                                 | SBH        |
| Aguascalientes      | 1990      | Census (IPUMS)                                         | SBH        |
| Aguascalientes      | 2000      | Census (IPUMS)                                         | SBH        |
| Aguascalientes      | 2005      | Census (IPUMS)                                         | SBH        |
| Aguascalientes      | 2009      | Mexico Household Income and Expenditure Survey (ENIGH) | SBH        |
| Aguascalientes      | 1991      | National Survey of Demographic Dynamics (ENADID)       | SBH        |
| Aguascalientes      | 1992      | National Survey of Demographic Dynamics (ENADID)       | CBH        |
| Aguascalientes      | 2006      | National Survey of Demographic Dynamics (ENADID)       | SBH        |
| Aguascalientes      | 2009      | National Survey of Demographic Dynamics (ENADID)       | SBH        |
| Aguascalientes      | 2014      | National Survey of Demographic Dynamics (ENADID)       | SBH        |
| Baja California     | 1979-2015 | Vital Registration                                     | VR/SRS/DSP |
| Baja California Sur | 1979-2015 | Vital Registration                                     | VR/SRS/DSP |
| Campeche            | 1990      | Census                                                 | SBH        |
| Campeche            | 2005      | Census                                                 | SBH        |
| Campeche            | 2010      | Census                                                 | SBH        |
| Campeche            | 2015      | Census                                                 | SBH        |
| Campeche            | 1990      | Census (IPUMS)                                         | SBH        |
| Campeche            | 2000      | Census (IPUMS)                                         | SBH        |
| Campeche            | 2005      | Census (IPUMS)                                         | SBH        |
| Campeche            | 2009      | Mexico Household Income and Expenditure Survey (ENIGH) | SBH        |
| Campeche            | 1991      | National Survey of Demographic Dynamics (ENADID)       | SBH        |
| Campeche            | 1992      | National Survey of Demographic Dynamics (ENADID)       | CBH        |
| Campeche            | 2006      | National Survey of Demographic Dynamics (ENADID)       | SBH        |
| Campeche            | 2009      | National Survey of Demographic Dynamics (ENADID)       | SBH        |
| Campeche            | 2014      | National Survey of Demographic Dynamics (ENADID)       | SBH        |
| Chiapas             | 1990      | Census                                                 | SBH        |



**Appendix Table 10. Under-5 mortality reference sources by source date and location, 1950-2016**

| Location         | Source    | Source years                                           | Method     |
|------------------|-----------|--------------------------------------------------------|------------|
| Chiapas          | 2005      | Census                                                 | SBH        |
| Chiapas          | 2010      | Census                                                 | SBH        |
| Chiapas          | 2015      | Census                                                 | SBH        |
| Chiapas          | 1990      | Census (IPUMS)                                         | SBH        |
| Chiapas          | 2000      | Census (IPUMS)                                         | SBH        |
| Chiapas          | 2005      | Census (IPUMS)                                         | SBH        |
| Chiapas          | 2009      | Mexico Household Income and Expenditure Survey (ENIGH) | SBH        |
| Chiapas          | 1991      | National Survey of Demographic Dynamics (ENADID)       | SBH        |
| Chiapas          | 1992      | National Survey of Demographic Dynamics (ENADID)       | CBH        |
| Chiapas          | 2006      | National Survey of Demographic Dynamics (ENADID)       | SBH        |
| Chiapas          | 2009      | National Survey of Demographic Dynamics (ENADID)       | SBH        |
| Chiapas          | 2014      | National Survey of Demographic Dynamics (ENADID)       | SBH        |
| Chihuahua        | 1990      | Census                                                 | SBH        |
| Chihuahua        | 2005      | Census                                                 | SBH        |
| Chihuahua        | 2010      | Census                                                 | SBH        |
| Chihuahua        | 2015      | Census                                                 | SBH        |
| Chihuahua        | 1990      | Census (IPUMS)                                         | SBH        |
| Chihuahua        | 2000      | Census (IPUMS)                                         | SBH        |
| Chihuahua        | 2005      | Census (IPUMS)                                         | SBH        |
| Chihuahua        | 2009      | Mexico Household Income and Expenditure Survey (ENIGH) | SBH        |
| Chihuahua        | 1991      | National Survey of Demographic Dynamics (ENADID)       | SBH        |
| Chihuahua        | 1992      | National Survey of Demographic Dynamics (ENADID)       | CBH        |
| Chihuahua        | 2006      | National Survey of Demographic Dynamics (ENADID)       | SBH        |
| Chihuahua        | 2009      | National Survey of Demographic Dynamics (ENADID)       | SBH        |
| Chihuahua        | 2014      | National Survey of Demographic Dynamics (ENADID)       | SBH        |
| Coahuila         | 1990      | Census                                                 | SBH        |
| Coahuila         | 2005      | Census                                                 | SBH        |
| Coahuila         | 2010      | Census                                                 | SBH        |
| Coahuila         | 2015      | Census                                                 | SBH        |
| Coahuila         | 1990      | Census (IPUMS)                                         | SBH        |
| Coahuila         | 2000      | Census (IPUMS)                                         | SBH        |
| Coahuila         | 2005      | Census (IPUMS)                                         | SBH        |
| Coahuila         | 2009      | Mexico Household Income and Expenditure Survey (ENIGH) | SBH        |
| Coahuila         | 1991      | National Survey of Demographic Dynamics (ENADID)       | SBH        |
| Coahuila         | 1992      | National Survey of Demographic Dynamics (ENADID)       | CBH        |
| Coahuila         | 2006      | National Survey of Demographic Dynamics (ENADID)       | SBH        |
| Coahuila         | 2009      | National Survey of Demographic Dynamics (ENADID)       | SBH        |
| Coahuila         | 2014      | National Survey of Demographic Dynamics (ENADID)       | SBH        |
| Colima           | 1990      | Census                                                 | SBH        |
| Colima           | 2005      | Census                                                 | SBH        |
| Colima           | 2010      | Census                                                 | SBH        |
| Colima           | 2015      | Census                                                 | SBH        |
| Colima           | 1990      | Census (IPUMS)                                         | SBH        |
| Colima           | 2000      | Census (IPUMS)                                         | SBH        |
| Colima           | 2005      | Census (IPUMS)                                         | SBH        |
| Colima           | 2009      | Mexico Household Income and Expenditure Survey (ENIGH) | SBH        |
| Colima           | 1991      | National Survey of Demographic Dynamics (ENADID)       | SBH        |
| Colima           | 1992      | National Survey of Demographic Dynamics (ENADID)       | CBH        |
| Colima           | 2006      | National Survey of Demographic Dynamics (ENADID)       | SBH        |
| Colima           | 2009      | National Survey of Demographic Dynamics (ENADID)       | SBH        |
| Colima           | 2014      | National Survey of Demographic Dynamics (ENADID)       | SBH        |
| Distrito Federal | 1979-2015 | Vital Registration                                     | VR/SRS/DSP |
| Durango          | 1990      | Census                                                 | SBH        |
| Durango          | 2005      | Census                                                 | SBH        |
| Durango          | 2010      | Census                                                 | SBH        |
| Durango          | 2015      | Census                                                 | SBH        |
| Durango          | 1990      | Census (IPUMS)                                         | SBH        |
| Durango          | 2000      | Census (IPUMS)                                         | SBH        |
| Durango          | 2005      | Census (IPUMS)                                         | SBH        |
| Durango          | 2009      | Mexico Household Income and Expenditure Survey (ENIGH) | SBH        |
| Durango          | 1991      | National Survey of Demographic Dynamics (ENADID)       | SBH        |
| Durango          | 1992      | National Survey of Demographic Dynamics (ENADID)       | CBH        |
| Durango          | 2006      | National Survey of Demographic Dynamics (ENADID)       | SBH        |
| Durango          | 2009      | National Survey of Demographic Dynamics (ENADID)       | SBH        |
| Durango          | 2014      | National Survey of Demographic Dynamics (ENADID)       | SBH        |
| Guanajuato       | 1990      | Census                                                 | SBH        |
| Guanajuato       | 2005      | Census                                                 | SBH        |

**Appendix Table 10. Under-5 mortality reference sources by source date and location, 1950-2016**

| Location            | Source    | Source years                                           | Method     |
|---------------------|-----------|--------------------------------------------------------|------------|
| Guanajuato          | 2010      | Census                                                 | SBH        |
| Guanajuato          | 2015      | Census                                                 | SBH        |
| Guanajuato          | 1990      | Census (IPUMS)                                         | SBH        |
| Guanajuato          | 2000      | Census (IPUMS)                                         | SBH        |
| Guanajuato          | 2005      | Census (IPUMS)                                         | SBH        |
| Guanajuato          | 2009      | Mexico Household Income and Expenditure Survey (ENIGH) | SBH        |
| Guanajuato          | 1991      | National Survey of Demographic Dynamics (ENADID)       | SBH        |
| Guanajuato          | 1992      | National Survey of Demographic Dynamics (ENADID)       | CBH        |
| Guanajuato          | 2006      | National Survey of Demographic Dynamics (ENADID)       | SBH        |
| Guanajuato          | 2009      | National Survey of Demographic Dynamics (ENADID)       | SBH        |
| Guanajuato          | 2014      | National Survey of Demographic Dynamics (ENADID)       | SBH        |
| Guerrero            | 1990      | Census                                                 | SBH        |
| Guerrero            | 2005      | Census                                                 | SBH        |
| Guerrero            | 2010      | Census                                                 | SBH        |
| Guerrero            | 2015      | Census                                                 | SBH        |
| Guerrero            | 1990      | Census (IPUMS)                                         | SBH        |
| Guerrero            | 2000      | Census (IPUMS)                                         | SBH        |
| Guerrero            | 2005      | Census (IPUMS)                                         | SBH        |
| Guerrero            | 2009      | Mexico Household Income and Expenditure Survey (ENIGH) | SBH        |
| Guerrero            | 1991      | National Survey of Demographic Dynamics (ENADID)       | SBH        |
| Guerrero            | 1992      | National Survey of Demographic Dynamics (ENADID)       | CBH        |
| Guerrero            | 2006      | National Survey of Demographic Dynamics (ENADID)       | SBH        |
| Guerrero            | 2009      | National Survey of Demographic Dynamics (ENADID)       | SBH        |
| Guerrero            | 2014      | National Survey of Demographic Dynamics (ENADID)       | SBH        |
| Hidalgo             | 1990      | Census                                                 | SBH        |
| Hidalgo             | 2005      | Census                                                 | SBH        |
| Hidalgo             | 2010      | Census                                                 | SBH        |
| Hidalgo             | 1990      | Census (IPUMS)                                         | SBH        |
| Hidalgo             | 2000      | Census (IPUMS)                                         | SBH        |
| Hidalgo             | 2005      | Census (IPUMS)                                         | SBH        |
| Hidalgo             | 2009      | Mexico Household Income and Expenditure Survey (ENIGH) | SBH        |
| Hidalgo             | 1991      | National Survey of Demographic Dynamics (ENADID)       | SBH        |
| Hidalgo             | 1992      | National Survey of Demographic Dynamics (ENADID)       | CBH        |
| Hidalgo             | 2006      | National Survey of Demographic Dynamics (ENADID)       | SBH        |
| Hidalgo             | 2009      | National Survey of Demographic Dynamics (ENADID)       | SBH        |
| Hidalgo             | 2014      | National Survey of Demographic Dynamics (ENADID)       | SBH        |
| Jalisco             | 1990      | Census                                                 | SBH        |
| Jalisco             | 2005      | Census                                                 | SBH        |
| Jalisco             | 2010      | Census                                                 | SBH        |
| Jalisco             | 2015      | Census                                                 | SBH        |
| Jalisco             | 1990      | Census (IPUMS)                                         | SBH        |
| Jalisco             | 2000      | Census (IPUMS)                                         | SBH        |
| Jalisco             | 2005      | Census (IPUMS)                                         | SBH        |
| Jalisco             | 2009      | Mexico Household Income and Expenditure Survey (ENIGH) | SBH        |
| Jalisco             | 1991      | National Survey of Demographic Dynamics (ENADID)       | SBH        |
| Jalisco             | 1992      | National Survey of Demographic Dynamics (ENADID)       | CBH        |
| Jalisco             | 2006      | National Survey of Demographic Dynamics (ENADID)       | SBH        |
| Jalisco             | 2009      | National Survey of Demographic Dynamics (ENADID)       | SBH        |
| Jalisco             | 2014      | National Survey of Demographic Dynamics (ENADID)       | SBH        |
| Mexico              | 1979-2015 | Vital Registration                                     | VR/SRS/DSP |
| Michoacan de Ocampo | 1990      | Census                                                 | SBH        |
| Michoacan de Ocampo | 2005      | Census                                                 | SBH        |
| Michoacan de Ocampo | 2010      | Census                                                 | SBH        |
| Michoacan de Ocampo | 2015      | Census                                                 | SBH        |
| Michoacan de Ocampo | 1990      | Census (IPUMS)                                         | SBH        |
| Michoacan de Ocampo | 2000      | Census (IPUMS)                                         | SBH        |
| Michoacan de Ocampo | 2005      | Census (IPUMS)                                         | SBH        |
| Michoacan de Ocampo | 2009      | Mexico Household Income and Expenditure Survey (ENIGH) | SBH        |
| Michoacan de Ocampo | 1991      | National Survey of Demographic Dynamics (ENADID)       | SBH        |
| Michoacan de Ocampo | 1992      | National Survey of Demographic Dynamics (ENADID)       | CBH        |
| Michoacan de Ocampo | 2006      | National Survey of Demographic Dynamics (ENADID)       | SBH        |
| Michoacan de Ocampo | 2009      | National Survey of Demographic Dynamics (ENADID)       | SBH        |
| Michoacan de Ocampo | 2014      | National Survey of Demographic Dynamics (ENADID)       | SBH        |
| Morelos             | 1990      | Census                                                 | SBH        |
| Morelos             | 2005      | Census                                                 | SBH        |
| Morelos             | 2010      | Census                                                 | SBH        |
| Morelos             | 2015      | Census                                                 | SBH        |

**Appendix Table 10. Under-5 mortality reference sources by source date and location, 1950-2016**

| Location     | Source    | Source years                                           | Method     |
|--------------|-----------|--------------------------------------------------------|------------|
| Morelos      | 1990      | Census (IPUMS)                                         | SBH        |
| Morelos      | 2000      | Census (IPUMS)                                         | SBH        |
| Morelos      | 2005      | Census (IPUMS)                                         | SBH        |
| Morelos      | 2009      | Mexico Household Income and Expenditure Survey (ENIGH) | SBH        |
| Morelos      | 1991      | National Survey of Demographic Dynamics (ENADID)       | SBH        |
| Morelos      | 1992      | National Survey of Demographic Dynamics (ENADID)       | CBH        |
| Morelos      | 2006      | National Survey of Demographic Dynamics (ENADID)       | SBH        |
| Morelos      | 2009      | National Survey of Demographic Dynamics (ENADID)       | SBH        |
| Morelos      | 2014      | National Survey of Demographic Dynamics (ENADID)       | SBH        |
| Nayarit      | 1990      | Census                                                 | SBH        |
| Nayarit      | 2005      | Census                                                 | SBH        |
| Nayarit      | 2010      | Census                                                 | SBH        |
| Nayarit      | 2015      | Census                                                 | SBH        |
| Nayarit      | 1990      | Census (IPUMS)                                         | SBH        |
| Nayarit      | 2000      | Census (IPUMS)                                         | SBH        |
| Nayarit      | 2005      | Census (IPUMS)                                         | SBH        |
| Nayarit      | 2009      | Mexico Household Income and Expenditure Survey (ENIGH) | SBH        |
| Nayarit      | 1991      | National Survey of Demographic Dynamics (ENADID)       | SBH        |
| Nayarit      | 1992      | National Survey of Demographic Dynamics (ENADID)       | CBH        |
| Nayarit      | 2006      | National Survey of Demographic Dynamics (ENADID)       | SBH        |
| Nayarit      | 2009      | National Survey of Demographic Dynamics (ENADID)       | SBH        |
| Nayarit      | 2014      | National Survey of Demographic Dynamics (ENADID)       | SBH        |
| Nuevo Leon   | 1990      | Census                                                 | SBH        |
| Nuevo Leon   | 2005      | Census                                                 | SBH        |
| Nuevo Leon   | 2010      | Census                                                 | SBH        |
| Nuevo Leon   | 2015      | Census                                                 | SBH        |
| Nuevo Leon   | 1990      | Census (IPUMS)                                         | SBH        |
| Nuevo Leon   | 2000      | Census (IPUMS)                                         | SBH        |
| Nuevo Leon   | 2005      | Census (IPUMS)                                         | SBH        |
| Nuevo Leon   | 2009      | Mexico Household Income and Expenditure Survey (ENIGH) | SBH        |
| Nuevo Leon   | 1991      | National Survey of Demographic Dynamics (ENADID)       | SBH        |
| Nuevo Leon   | 1992      | National Survey of Demographic Dynamics (ENADID)       | CBH        |
| Nuevo Leon   | 2006      | National Survey of Demographic Dynamics (ENADID)       | SBH        |
| Nuevo Leon   | 2009      | National Survey of Demographic Dynamics (ENADID)       | SBH        |
| Nuevo Leon   | 2014      | National Survey of Demographic Dynamics (ENADID)       | SBH        |
| Oaxaca       | 1990      | Census                                                 | SBH        |
| Oaxaca       | 2005      | Census                                                 | SBH        |
| Oaxaca       | 2010      | Census                                                 | SBH        |
| Oaxaca       | 2015      | Census                                                 | SBH        |
| Oaxaca       | 1990      | Census (IPUMS)                                         | SBH        |
| Oaxaca       | 2000      | Census (IPUMS)                                         | SBH        |
| Oaxaca       | 2005      | Census (IPUMS)                                         | SBH        |
| Oaxaca       | 2009      | Mexico Household Income and Expenditure Survey (ENIGH) | SBH        |
| Oaxaca       | 1991      | National Survey of Demographic Dynamics (ENADID)       | SBH        |
| Oaxaca       | 1992      | National Survey of Demographic Dynamics (ENADID)       | CBH        |
| Oaxaca       | 2006      | National Survey of Demographic Dynamics (ENADID)       | SBH        |
| Oaxaca       | 2009      | National Survey of Demographic Dynamics (ENADID)       | SBH        |
| Oaxaca       | 2014      | National Survey of Demographic Dynamics (ENADID)       | SBH        |
| Puebla       | 1990      | Census                                                 | SBH        |
| Puebla       | 2005      | Census                                                 | SBH        |
| Puebla       | 2010      | Census                                                 | SBH        |
| Puebla       | 2015      | Census                                                 | SBH        |
| Puebla       | 1990      | Census (IPUMS)                                         | SBH        |
| Puebla       | 2000      | Census (IPUMS)                                         | SBH        |
| Puebla       | 2005      | Census (IPUMS)                                         | SBH        |
| Puebla       | 2009      | Mexico Household Income and Expenditure Survey (ENIGH) | SBH        |
| Puebla       | 1991      | National Survey of Demographic Dynamics (ENADID)       | SBH        |
| Puebla       | 1992      | National Survey of Demographic Dynamics (ENADID)       | CBH        |
| Puebla       | 2006      | National Survey of Demographic Dynamics (ENADID)       | SBH        |
| Puebla       | 2009      | National Survey of Demographic Dynamics (ENADID)       | SBH        |
| Puebla       | 2014      | National Survey of Demographic Dynamics (ENADID)       | SBH        |
| Queretaro    | 1979-2015 | Vital Registration                                     | VR/SRS/DSP |
| Quintana Roo | 1990      | Census                                                 | SBH        |
| Quintana Roo | 2005      | Census                                                 | SBH        |
| Quintana Roo | 2010      | Census                                                 | SBH        |
| Quintana Roo | 2015      | Census                                                 | SBH        |
| Quintana Roo | 1990      | Census (IPUMS)                                         | SBH        |

**Appendix Table 10. Under-5 mortality reference sources by source date and location, 1950-2016**

| Location        | Source | Source years                                           | Method |
|-----------------|--------|--------------------------------------------------------|--------|
| Quintana Roo    | 2000   | Census (IPUMS)                                         | SBH    |
| Quintana Roo    | 2005   | Census (IPUMS)                                         | SBH    |
| Quintana Roo    | 2009   | Mexico Household Income and Expenditure Survey (ENIGH) | SBH    |
| Quintana Roo    | 1991   | National Survey of Demographic Dynamics (ENADID)       | SBH    |
| Quintana Roo    | 1992   | National Survey of Demographic Dynamics (ENADID)       | CBH    |
| Quintana Roo    | 2006   | National Survey of Demographic Dynamics (ENADID)       | SBH    |
| Quintana Roo    | 2009   | National Survey of Demographic Dynamics (ENADID)       | SBH    |
| Quintana Roo    | 2014   | National Survey of Demographic Dynamics (ENADID)       | SBH    |
| San Luis Potosi | 1990   | Census                                                 | SBH    |
| San Luis Potosi | 2005   | Census                                                 | SBH    |
| San Luis Potosi | 2010   | Census                                                 | SBH    |
| San Luis Potosi | 2015   | Census                                                 | SBH    |
| San Luis Potosi | 1990   | Census (IPUMS)                                         | SBH    |
| San Luis Potosi | 2000   | Census (IPUMS)                                         | SBH    |
| San Luis Potosi | 2005   | Census (IPUMS)                                         | SBH    |
| San Luis Potosi | 2009   | Mexico Household Income and Expenditure Survey (ENIGH) | SBH    |
| San Luis Potosi | 1991   | National Survey of Demographic Dynamics (ENADID)       | SBH    |
| San Luis Potosi | 1992   | National Survey of Demographic Dynamics (ENADID)       | CBH    |
| San Luis Potosi | 2006   | National Survey of Demographic Dynamics (ENADID)       | SBH    |
| San Luis Potosi | 2009   | National Survey of Demographic Dynamics (ENADID)       | SBH    |
| San Luis Potosi | 2014   | National Survey of Demographic Dynamics (ENADID)       | SBH    |
| Sinaloa         | 1990   | Census                                                 | SBH    |
| Sinaloa         | 2005   | Census                                                 | SBH    |
| Sinaloa         | 2010   | Census                                                 | SBH    |
| Sinaloa         | 2015   | Census                                                 | SBH    |
| Sinaloa         | 1990   | Census (IPUMS)                                         | SBH    |
| Sinaloa         | 2000   | Census (IPUMS)                                         | SBH    |
| Sinaloa         | 2005   | Census (IPUMS)                                         | SBH    |
| Sinaloa         | 2009   | Mexico Household Income and Expenditure Survey (ENIGH) | SBH    |
| Sinaloa         | 1991   | National Survey of Demographic Dynamics (ENADID)       | SBH    |
| Sinaloa         | 1992   | National Survey of Demographic Dynamics (ENADID)       | CBH    |
| Sinaloa         | 2006   | National Survey of Demographic Dynamics (ENADID)       | SBH    |
| Sinaloa         | 2009   | National Survey of Demographic Dynamics (ENADID)       | SBH    |
| Sinaloa         | 2014   | National Survey of Demographic Dynamics (ENADID)       | SBH    |
| Sonora          | 1990   | Census                                                 | SBH    |
| Sonora          | 2005   | Census                                                 | SBH    |
| Sonora          | 2010   | Census                                                 | SBH    |
| Sonora          | 2015   | Census                                                 | SBH    |
| Sonora          | 1990   | Census (IPUMS)                                         | SBH    |
| Sonora          | 2000   | Census (IPUMS)                                         | SBH    |
| Sonora          | 2005   | Census (IPUMS)                                         | SBH    |
| Sonora          | 1991   | National Survey of Demographic Dynamics (ENADID)       | SBH    |
| Sonora          | 1992   | National Survey of Demographic Dynamics (ENADID)       | CBH    |
| Sonora          | 2006   | National Survey of Demographic Dynamics (ENADID)       | SBH    |
| Sonora          | 2009   | National Survey of Demographic Dynamics (ENADID)       | SBH    |
| Sonora          | 2014   | National Survey of Demographic Dynamics (ENADID)       | SBH    |
| Tabasco         | 1990   | Census                                                 | SBH    |
| Tabasco         | 2005   | Census                                                 | SBH    |
| Tabasco         | 2010   | Census                                                 | SBH    |
| Tabasco         | 2015   | Census                                                 | SBH    |
| Tabasco         | 1990   | Census (IPUMS)                                         | SBH    |
| Tabasco         | 2000   | Census (IPUMS)                                         | SBH    |
| Tabasco         | 2005   | Census (IPUMS)                                         | SBH    |
| Tabasco         | 2009   | Mexico Household Income and Expenditure Survey (ENIGH) | SBH    |
| Tabasco         | 1991   | National Survey of Demographic Dynamics (ENADID)       | SBH    |
| Tabasco         | 1992   | National Survey of Demographic Dynamics (ENADID)       | CBH    |
| Tabasco         | 2006   | National Survey of Demographic Dynamics (ENADID)       | SBH    |
| Tabasco         | 2009   | National Survey of Demographic Dynamics (ENADID)       | SBH    |
| Tabasco         | 2014   | National Survey of Demographic Dynamics (ENADID)       | SBH    |
| Tamaulipas      | 1990   | Census                                                 | SBH    |
| Tamaulipas      | 2005   | Census                                                 | SBH    |
| Tamaulipas      | 2010   | Census                                                 | SBH    |
| Tamaulipas      | 2015   | Census                                                 | SBH    |
| Tamaulipas      | 1990   | Census (IPUMS)                                         | SBH    |
| Tamaulipas      | 2000   | Census (IPUMS)                                         | SBH    |
| Tamaulipas      | 2005   | Census (IPUMS)                                         | SBH    |
| Tamaulipas      | 2009   | Mexico Household Income and Expenditure Survey (ENIGH) | SBH    |

**Appendix Table 10. Under-5 mortality reference sources by source date and location, 1950-2016**

| Location                        | Source    | Source years                                           | Method     |
|---------------------------------|-----------|--------------------------------------------------------|------------|
| Tamaulipas                      | 1991      | National Survey of Demographic Dynamics (ENADID)       | SBH        |
| Tamaulipas                      | 1992      | National Survey of Demographic Dynamics (ENADID)       | CBH        |
| Tamaulipas                      | 2006      | National Survey of Demographic Dynamics (ENADID)       | SBH        |
| Tamaulipas                      | 2009      | National Survey of Demographic Dynamics (ENADID)       | SBH        |
| Tamaulipas                      | 2014      | National Survey of Demographic Dynamics (ENADID)       | SBH        |
| Tlaxcala                        | 1979-2015 | Vital Registration                                     | VR/SRS/DSP |
| Veracruz de Ignacio de la Llave | 1990      | Census                                                 | SBH        |
| Veracruz de Ignacio de la Llave | 2005      | Census                                                 | SBH        |
| Veracruz de Ignacio de la Llave | 2010      | Census                                                 | SBH        |
| Veracruz de Ignacio de la Llave | 2015      | Census                                                 | SBH        |
| Veracruz de Ignacio de la Llave | 1990      | Census (IPUMS)                                         | SBH        |
| Veracruz de Ignacio de la Llave | 2000      | Census (IPUMS)                                         | SBH        |
| Veracruz de Ignacio de la Llave | 2005      | Census (IPUMS)                                         | SBH        |
| Veracruz de Ignacio de la Llave | 2009      | Mexico Household Income and Expenditure Survey (ENIGH) | SBH        |
| Veracruz de Ignacio de la Llave | 1991      | National Survey of Demographic Dynamics (ENADID)       | SBH        |
| Veracruz de Ignacio de la Llave | 1992      | National Survey of Demographic Dynamics (ENADID)       | CBH        |
| Veracruz de Ignacio de la Llave | 2006      | National Survey of Demographic Dynamics (ENADID)       | SBH        |
| Veracruz de Ignacio de la Llave | 2009      | National Survey of Demographic Dynamics (ENADID)       | SBH        |
| Veracruz de Ignacio de la Llave | 2014      | National Survey of Demographic Dynamics (ENADID)       | SBH        |
| Yucatan                         | 1990      | Census                                                 | SBH        |
| Yucatan                         | 2005      | Census                                                 | SBH        |
| Yucatan                         | 2010      | Census                                                 | SBH        |
| Yucatan                         | 2015      | Census                                                 | SBH        |
| Yucatan                         | 1990      | Census (IPUMS)                                         | SBH        |
| Yucatan                         | 2000      | Census (IPUMS)                                         | SBH        |
| Yucatan                         | 2005      | Census (IPUMS)                                         | SBH        |
| Yucatan                         | 2009      | Mexico Household Income and Expenditure Survey (ENIGH) | SBH        |
| Yucatan                         | 1991      | National Survey of Demographic Dynamics (ENADID)       | SBH        |
| Yucatan                         | 1992      | National Survey of Demographic Dynamics (ENADID)       | CBH        |
| Yucatan                         | 2006      | National Survey of Demographic Dynamics (ENADID)       | SBH        |
| Yucatan                         | 2009      | National Survey of Demographic Dynamics (ENADID)       | SBH        |
| Yucatan                         | 2014      | National Survey of Demographic Dynamics (ENADID)       | SBH        |
| Zacatecas                       | 1990      | Census                                                 | SBH        |
| Zacatecas                       | 2005      | Census                                                 | SBH        |
| Zacatecas                       | 2010      | Census                                                 | SBH        |
| Zacatecas                       | 2015      | Census                                                 | SBH        |
| Zacatecas                       | 1990      | Census (IPUMS)                                         | SBH        |
| Zacatecas                       | 2000      | Census (IPUMS)                                         | SBH        |
| Zacatecas                       | 2005      | Census (IPUMS)                                         | SBH        |
| Zacatecas                       | 2009      | Mexico Household Income and Expenditure Survey (ENIGH) | SBH        |
| Zacatecas                       | 1991      | National Survey of Demographic Dynamics (ENADID)       | SBH        |
| Zacatecas                       | 1992      | National Survey of Demographic Dynamics (ENADID)       | CBH        |
| Zacatecas                       | 2006      | National Survey of Demographic Dynamics (ENADID)       | SBH        |
| Zacatecas                       | 2009      | National Survey of Demographic Dynamics (ENADID)       | SBH        |
| Zacatecas                       | 2014      | National Survey of Demographic Dynamics (ENADID)       | SBH        |
| Nicaragua                       | 1997      | Demographic and Health Survey (DHS)                    | CBH        |
| Nicaragua                       | 2001      | Demographic and Health Survey (DHS)                    | CBH        |
| Panama                          | 1990      | Census (IPUMS)                                         | SBH        |
| Panama                          | 2000      | Census (IPUMS)                                         | SBH        |
| Panama                          | 2010      | Census (IPUMS)                                         | SBH        |
| Panama                          | 1997      | Living Standards Measurement Study (LSMS)              | SBH        |
| Panama                          | 2003      | Living Standards Measurement Study (LSMS)              | SBH        |
| Venezuela                       | 1950-2013 | Vital Registration                                     | VR/SRS/DSP |
| Brazil                          | 1996      | Demographic and Health Survey (DHS)                    | CBH        |
| Acre                            | 2005      | Brazil National Household Sample Survey (PNAD)         | SBH        |
| Acre                            | 2006      | Brazil National Household Sample Survey (PNAD)         | SBH        |
| Acre                            | 2007      | Brazil National Household Sample Survey (PNAD)         | SBH        |
| Acre                            | 2008      | Brazil National Household Sample Survey (PNAD)         | SBH        |
| Acre                            | 2009      | Brazil National Household Sample Survey (PNAD)         | SBH        |
| Alagoas                         | 2005      | Brazil National Household Sample Survey (PNAD)         | SBH        |
| Amapa                           | 2008      | Brazil National Household Sample Survey (PNAD)         | SBH        |
| Amazonas                        | 1996      | Demographic and Health Survey (DHS)                    | CBH        |
| Bahia                           | 1992      | Brazil National Household Sample Survey (PNAD)         | SBH        |
| Bahia                           | 1993      | Brazil National Household Sample Survey (PNAD)         | SBH        |
| Bahia                           | 1995      | Brazil National Household Sample Survey (PNAD)         | SBH        |
| Bahia                           | 1996      | Brazil National Household Sample Survey (PNAD)         | SBH        |
| Bahia                           | 1997      | Brazil National Household Sample Survey (PNAD)         | SBH        |



**Appendix Table 10. Under-5 mortality reference sources by source date and location, 1950-2016**

| Location           | Source | Source years                                   | Method |
|--------------------|--------|------------------------------------------------|--------|
| Mato Grosso        | 1999   | Brazil National Household Sample Survey (PNAD) | SBH    |
| Mato Grosso        | 2001   | Brazil National Household Sample Survey (PNAD) | SBH    |
| Mato Grosso        | 2002   | Brazil National Household Sample Survey (PNAD) | SBH    |
| Mato Grosso        | 2003   | Brazil National Household Sample Survey (PNAD) | SBH    |
| Mato Grosso        | 2004   | Brazil National Household Sample Survey (PNAD) | SBH    |
| Mato Grosso        | 2005   | Brazil National Household Sample Survey (PNAD) | SBH    |
| Mato Grosso        | 2006   | Brazil National Household Sample Survey (PNAD) | SBH    |
| Mato Grosso        | 2007   | Brazil National Household Sample Survey (PNAD) | SBH    |
| Mato Grosso        | 2008   | Brazil National Household Sample Survey (PNAD) | SBH    |
| Mato Grosso        | 2009   | Brazil National Household Sample Survey (PNAD) | SBH    |
| Mato Grosso do Sul | 1992   | Brazil National Household Sample Survey (PNAD) | SBH    |
| Mato Grosso do Sul | 1993   | Brazil National Household Sample Survey (PNAD) | SBH    |
| Mato Grosso do Sul | 1995   | Brazil National Household Sample Survey (PNAD) | SBH    |
| Mato Grosso do Sul | 1996   | Brazil National Household Sample Survey (PNAD) | SBH    |
| Mato Grosso do Sul | 1997   | Brazil National Household Sample Survey (PNAD) | SBH    |
| Mato Grosso do Sul | 1998   | Brazil National Household Sample Survey (PNAD) | SBH    |
| Mato Grosso do Sul | 1999   | Brazil National Household Sample Survey (PNAD) | SBH    |
| Mato Grosso do Sul | 2001   | Brazil National Household Sample Survey (PNAD) | SBH    |
| Mato Grosso do Sul | 2002   | Brazil National Household Sample Survey (PNAD) | SBH    |
| Mato Grosso do Sul | 2003   | Brazil National Household Sample Survey (PNAD) | SBH    |
| Mato Grosso do Sul | 2004   | Brazil National Household Sample Survey (PNAD) | SBH    |
| Mato Grosso do Sul | 2005   | Brazil National Household Sample Survey (PNAD) | SBH    |
| Mato Grosso do Sul | 2006   | Brazil National Household Sample Survey (PNAD) | SBH    |
| Mato Grosso do Sul | 2007   | Brazil National Household Sample Survey (PNAD) | SBH    |
| Mato Grosso do Sul | 2008   | Brazil National Household Sample Survey (PNAD) | SBH    |
| Mato Grosso do Sul | 2009   | Brazil National Household Sample Survey (PNAD) | SBH    |
| Minas Gerais       | 1992   | Brazil National Household Sample Survey (PNAD) | SBH    |
| Minas Gerais       | 1993   | Brazil National Household Sample Survey (PNAD) | SBH    |
| Minas Gerais       | 1995   | Brazil National Household Sample Survey (PNAD) | SBH    |
| Minas Gerais       | 1996   | Brazil National Household Sample Survey (PNAD) | SBH    |
| Minas Gerais       | 1997   | Brazil National Household Sample Survey (PNAD) | SBH    |
| Minas Gerais       | 1998   | Brazil National Household Sample Survey (PNAD) | SBH    |
| Minas Gerais       | 1999   | Brazil National Household Sample Survey (PNAD) | SBH    |
| Minas Gerais       | 2001   | Brazil National Household Sample Survey (PNAD) | SBH    |
| Minas Gerais       | 2002   | Brazil National Household Sample Survey (PNAD) | SBH    |
| Minas Gerais       | 2003   | Brazil National Household Sample Survey (PNAD) | SBH    |
| Minas Gerais       | 2004   | Brazil National Household Sample Survey (PNAD) | SBH    |
| Minas Gerais       | 2005   | Brazil National Household Sample Survey (PNAD) | SBH    |
| Minas Gerais       | 2006   | Brazil National Household Sample Survey (PNAD) | SBH    |
| Minas Gerais       | 2007   | Brazil National Household Sample Survey (PNAD) | SBH    |
| Minas Gerais       | 2008   | Brazil National Household Sample Survey (PNAD) | SBH    |
| Minas Gerais       | 2009   | Brazil National Household Sample Survey (PNAD) | SBH    |
| Para               | 2005   | Brazil National Household Sample Survey (PNAD) | SBH    |
| Para               | 2006   | Brazil National Household Sample Survey (PNAD) | SBH    |
| Para               | 2007   | Brazil National Household Sample Survey (PNAD) | SBH    |
| Para               | 2008   | Brazil National Household Sample Survey (PNAD) | SBH    |
| Para               | 2009   | Brazil National Household Sample Survey (PNAD) | SBH    |
| Paraíba            | 1991   | Demographic and Health Survey (DHS)            | CBH    |
| Paraíba            | 1996   | Demographic and Health Survey (DHS)            | CBH    |
| Parana             | 1996   | Demographic and Health Survey (DHS)            | CBH    |
| Pernambuco         | 1992   | Brazil National Household Sample Survey (PNAD) | SBH    |
| Pernambuco         | 1993   | Brazil National Household Sample Survey (PNAD) | SBH    |
| Pernambuco         | 1995   | Brazil National Household Sample Survey (PNAD) | SBH    |
| Pernambuco         | 1996   | Brazil National Household Sample Survey (PNAD) | SBH    |
| Pernambuco         | 1997   | Brazil National Household Sample Survey (PNAD) | SBH    |
| Pernambuco         | 1998   | Brazil National Household Sample Survey (PNAD) | SBH    |
| Pernambuco         | 1999   | Brazil National Household Sample Survey (PNAD) | SBH    |
| Pernambuco         | 2001   | Brazil National Household Sample Survey (PNAD) | SBH    |
| Pernambuco         | 2002   | Brazil National Household Sample Survey (PNAD) | SBH    |
| Pernambuco         | 2003   | Brazil National Household Sample Survey (PNAD) | SBH    |
| Pernambuco         | 2004   | Brazil National Household Sample Survey (PNAD) | SBH    |
| Pernambuco         | 2005   | Brazil National Household Sample Survey (PNAD) | SBH    |
| Pernambuco         | 2006   | Brazil National Household Sample Survey (PNAD) | SBH    |
| Pernambuco         | 2007   | Brazil National Household Sample Survey (PNAD) | SBH    |
| Pernambuco         | 2008   | Brazil National Household Sample Survey (PNAD) | SBH    |
| Pernambuco         | 2009   | Brazil National Household Sample Survey (PNAD) | SBH    |
| Piauí              | 2000   | Census                                         | SBH    |

**Appendix Table 10. Under-5 mortality reference sources by source date and location, 1950-2016**

| Location            | Source    | Source years                                      | Method     |
|---------------------|-----------|---------------------------------------------------|------------|
| Piaui               | 1970      | Census (IPUMS)                                    | SBH        |
| Piaui               | 1980      | Census (IPUMS)                                    | SBH        |
| Piaui               | 1991      | Census (IPUMS)                                    | SBH        |
| Rio de Janeiro      | 1979-2015 | Vital Registration                                | VR/SRS/DSP |
| Rio Grande do Norte | 2001      | Brazil National Household Sample Survey (PNAD)    | SBH        |
| Rio Grande do Norte | 2002      | Brazil National Household Sample Survey (PNAD)    | SBH        |
| Rio Grande do Sul   | 1979-2015 | Vital Registration                                | VR/SRS/DSP |
| Rondonia            | 2000      | Census                                            | SBH        |
| Rondonia            | 1970      | Census (IPUMS)                                    | SBH        |
| Rondonia            | 1980      | Census (IPUMS)                                    | SBH        |
| Rondonia            | 1991      | Census (IPUMS)                                    | SBH        |
| Roraima             | 2006      | Brazil National Household Sample Survey (PNAD)    | SBH        |
| Santa Catarina      | 1992      | Brazil National Household Sample Survey (PNAD)    | SBH        |
| Santa Catarina      | 1993      | Brazil National Household Sample Survey (PNAD)    | SBH        |
| Santa Catarina      | 1995      | Brazil National Household Sample Survey (PNAD)    | SBH        |
| Santa Catarina      | 1996      | Brazil National Household Sample Survey (PNAD)    | SBH        |
| Santa Catarina      | 1997      | Brazil National Household Sample Survey (PNAD)    | SBH        |
| Santa Catarina      | 1998      | Brazil National Household Sample Survey (PNAD)    | SBH        |
| Santa Catarina      | 1999      | Brazil National Household Sample Survey (PNAD)    | SBH        |
| Santa Catarina      | 2001      | Brazil National Household Sample Survey (PNAD)    | SBH        |
| Santa Catarina      | 2002      | Brazil National Household Sample Survey (PNAD)    | SBH        |
| Santa Catarina      | 2003      | Brazil National Household Sample Survey (PNAD)    | SBH        |
| Santa Catarina      | 2004      | Brazil National Household Sample Survey (PNAD)    | SBH        |
| Santa Catarina      | 2005      | Brazil National Household Sample Survey (PNAD)    | SBH        |
| Santa Catarina      | 2006      | Brazil National Household Sample Survey (PNAD)    | SBH        |
| Santa Catarina      | 2007      | Brazil National Household Sample Survey (PNAD)    | SBH        |
| Santa Catarina      | 2008      | Brazil National Household Sample Survey (PNAD)    | SBH        |
| Santa Catarina      | 2009      | Brazil National Household Sample Survey (PNAD)    | SBH        |
| Sao Paulo           | 1979-2015 | Vital Registration                                | VR/SRS/DSP |
| Sergipe             | 1992      | Brazil National Household Sample Survey (PNAD)    | SBH        |
| Sergipe             | 1993      | Brazil National Household Sample Survey (PNAD)    | SBH        |
| Sergipe             | 1995      | Brazil National Household Sample Survey (PNAD)    | SBH        |
| Sergipe             | 1996      | Brazil National Household Sample Survey (PNAD)    | SBH        |
| Sergipe             | 1997      | Brazil National Household Sample Survey (PNAD)    | SBH        |
| Sergipe             | 1998      | Brazil National Household Sample Survey (PNAD)    | SBH        |
| Sergipe             | 1999      | Brazil National Household Sample Survey (PNAD)    | SBH        |
| Sergipe             | 2001      | Brazil National Household Sample Survey (PNAD)    | SBH        |
| Sergipe             | 2002      | Brazil National Household Sample Survey (PNAD)    | SBH        |
| Sergipe             | 2003      | Brazil National Household Sample Survey (PNAD)    | SBH        |
| Sergipe             | 2004      | Brazil National Household Sample Survey (PNAD)    | SBH        |
| Sergipe             | 2005      | Brazil National Household Sample Survey (PNAD)    | SBH        |
| Sergipe             | 2006      | Brazil National Household Sample Survey (PNAD)    | SBH        |
| Sergipe             | 2007      | Brazil National Household Sample Survey (PNAD)    | SBH        |
| Sergipe             | 2008      | Brazil National Household Sample Survey (PNAD)    | SBH        |
| Sergipe             | 2009      | Brazil National Household Sample Survey (PNAD)    | SBH        |
| Tocantins           | 2005      | Brazil National Household Sample Survey (PNAD)    | SBH        |
| Tocantins           | 2006      | Brazil National Household Sample Survey (PNAD)    | SBH        |
| Tocantins           | 2007      | Brazil National Household Sample Survey (PNAD)    | SBH        |
| Tocantins           | 2008      | Brazil National Household Sample Survey (PNAD)    | SBH        |
| Tocantins           | 2009      | Brazil National Household Sample Survey (PNAD)    | SBH        |
| Paraguay            | 1990      | Demographic and Health Survey (DHS)               | CBH        |
| Paraguay            | 1995      | Reproductive Health Survey (RHS)                  | CBH        |
| Paraguay            | 1998      | Reproductive Health Survey (RHS)                  | CBH        |
| Paraguay            | 2004      | Reproductive Health Survey (RHS)                  | CBH        |
| Paraguay            | 2008      | Reproductive Health Survey (RHS)                  | CBH        |
| Afghanistan         | 2008      | Afghanistan Living Conditions Survey              | SBH        |
| Afghanistan         | 2012      | Afghanistan Living Conditions Survey              | SBH        |
| Afghanistan         | 2006      | Health Survey                                     | SBH        |
| Afghanistan         | 2000      | Multiple Indicator Cluster Survey (MICS)          | SBH        |
| Afghanistan         | 2003      | Multiple Indicator Cluster Survey (MICS)          | SBH        |
| Afghanistan         | 2010      | Multiple Indicator Cluster Survey (MICS)          | SBH        |
| Algeria             | 2000      | Multiple Indicator Cluster Survey (MICS)          | SBH        |
| Algeria             | 2012      | Multiple Indicator Cluster Survey (MICS)          | SBH        |
| Algeria             | 2012      | Multiple Indicator Cluster Survey (MICS)          | CBH        |
| Algeria             | 1992      | Pan Arab Project for Child Development (PAPCHILD) | SBH        |
| Algeria             | 1992      | Pan Arab Project for Child Development (PAPCHILD) | CBH        |
| Algeria             | 2002      | Pan Arab Project for Family Health (PAPFAM)       | SBH        |



**Appendix Table 10. Under-5 mortality reference sources by source date and location, 1950-2016**

| Location  | Source    | Source years                                      | Method     |
|-----------|-----------|---------------------------------------------------|------------|
| Algeria   | 2002      | Pan Arab Project for Family Health (PAPFAM)       | CBH        |
| Bahrain   | 1980-2012 | Vital Registration                                | VR/SRS/DSP |
| Egypt     | 1988      | Demographic and Health Survey (DHS)               | CBH        |
| Egypt     | 1992      | Demographic and Health Survey (DHS)               | CBH        |
| Egypt     | 1995      | Demographic and Health Survey (DHS)               | CBH        |
| Egypt     | 1997      | Demographic and Health Survey (DHS)               | CBH        |
| Egypt     | 2000      | Demographic and Health Survey (DHS)               | CBH        |
| Egypt     | 2003      | Demographic and Health Survey (DHS)               | CBH        |
| Egypt     | 2005      | Demographic and Health Survey (DHS)               | CBH        |
| Egypt     | 2008      | Demographic and Health Survey (DHS)               | CBH        |
| Egypt     | 2014      | Demographic and Health Survey (DHS)               | CBH        |
| Egypt     | 1998      | Interim Demographic and Health Survey (DHS)       | CBH        |
| Iran      | 2006      | Census (IPUMS)                                    | SBH        |
| Iran      | 2010      | Demographic and Health Survey (DHS)               | CBH        |
| Iran      | 1967      | Health Survey                                     | CBH        |
| Iran      | 1969      | Health Survey                                     | CBH        |
| Iran      | 1971      | Health Survey                                     | CBH        |
| Iran      | 1973      | Health Survey                                     | CBH        |
| Iran      | 1974      | Health Survey                                     | CBH        |
| Iran      | 1975      | Health Survey                                     | CBH        |
| Iran      | 1977      | Health Survey                                     | CBH        |
| Iran      | 1979      | Health Survey                                     | CBH        |
| Iran      | 1981      | Health Survey                                     | CBH        |
| Iran      | 1983      | Health Survey                                     | CBH        |
| Iran      | 1984      | Health Survey                                     | CBH        |
| Iran      | 1985      | Health Survey                                     | CBH        |
| Iran      | 1987      | Health Survey                                     | CBH        |
| Iran      | 1989      | Health Survey                                     | CBH        |
| Iran      | 1991      | Health Survey                                     | CBH        |
| Iran      | 1993      | Health Survey                                     | CBH        |
| Iran      | 1994      | Health Survey                                     | CBH        |
| Iran      | 1995      | Health Survey                                     | CBH        |
| Iran      | 1997      | Health Survey                                     | CBH        |
| Iran      | 1999      | Health Survey                                     | SBH        |
| Iran      | 1999      | Health Survey                                     | CBH        |
| Iraq      | 2006      | Multiple Indicator Cluster Survey (MICS)          | SBH        |
| Iraq      | 2006      | Multiple Indicator Cluster Survey (MICS)          | CBH        |
| Iraq      | 2011      | Multiple Indicator Cluster Survey (MICS)          | SBH        |
| Iraq      | 2011      | Multiple Indicator Cluster Survey (MICS)          | CBH        |
| Jordan    | 1990      | Demographic and Health Survey (DHS)               | CBH        |
| Jordan    | 1997      | Demographic and Health Survey (DHS)               | CBH        |
| Jordan    | 2002      | Demographic and Health Survey (DHS)               | CBH        |
| Jordan    | 2007      | Demographic and Health Survey (DHS)               | CBH        |
| Jordan    | 2009      | Demographic and Health Survey (DHS)               | CBH        |
| Jordan    | 2012      | Demographic and Health Survey (DHS)               | CBH        |
| Kuwait    | 1962-2014 | Vital Registration                                | VR/SRS/DSP |
| Lebanon   | 2000      | Multiple Indicator Cluster Survey (MICS)          | SBH        |
| Lebanon   | 2009      | Multiple Indicator Cluster Survey (MICS)          | SBH        |
| Lebanon   | 1996      | Pan Arab Project for Child Development (PAPCHILD) | CBH        |
| Lebanon   | 1996      | Pan Arab Project for Child Development (PAPCHILD) | SBH        |
| Lebanon   | 2004      | Pan Arab Project for Family Health (PAPFAM)       | SBH        |
| Lebanon   | 2004      | Pan Arab Project for Family Health (PAPFAM)       | CBH        |
| Lebanon   | 2011-2015 | Vital Registration                                | VR/SRS/DSP |
| Libya     | 2003      | Multiple Indicator Cluster Survey (MICS)          | SBH        |
| Libya     | 1995      | Pan Arab Project for Child Development (PAPCHILD) | CBH        |
| Libya     | 1995      | Pan Arab Project for Child Development (PAPCHILD) | SBH        |
| Libya     | 2007      | Pan Arab Project for Family Health (PAPFAM)       | SBH        |
| Morocco   | 1987      | Demographic and Health Survey (DHS)               | CBH        |
| Morocco   | 1992      | Demographic and Health Survey (DHS)               | CBH        |
| Morocco   | 2003      | Demographic and Health Survey (DHS)               | CBH        |
| Palestine | 1997      | Census (IPUMS)                                    | SBH        |
| Palestine | 2007      | Census (IPUMS)                                    | SBH        |
| Palestine | 2004      | Demographic and Health Survey (DHS)               | SBH        |
| Palestine | 2000      | Health Survey                                     | SBH        |
| Palestine | 2000      | Health Survey                                     | CBH        |
| Palestine | 2001      | Health Survey                                     | CBH        |
| Palestine | 2010      | Multiple Indicator Cluster Survey (MICS)          | CBH        |

**Appendix Table 10. Under-5 mortality reference sources by source date and location, 1950-2016**

| Location              | Source    | Source years                                                   | Method     |
|-----------------------|-----------|----------------------------------------------------------------|------------|
| Palestine             | 2010      | Multiple Indicator Cluster Survey (MICS)                       | SBH        |
| Palestine             | 2014      | Multiple Indicator Cluster Survey (MICS)                       | SBH        |
| Palestine             | 2014      | Multiple Indicator Cluster Survey (MICS)                       | CBH        |
| Palestine             | 1992      | National Demographic and Health Survey                         | CBH        |
| Palestine             | 2004      | National Demographic and Health Survey                         | CBH        |
| Palestine             | 2004      | Pan Arab Project for Family Health (PAPFAM)                    | CBH        |
| Oman                  | 2004-2013 | Vital Registration                                             | VR/SRS/DSP |
| Qatar                 | 1987      | Gulf Child Health Survey                                       | CBH        |
| Qatar                 | 1987      | Gulf Child Health Survey                                       | SBH        |
| Qatar                 | 1998      | Gulf Family Health Survey                                      | CBH        |
| Saudi Arabia          | 2004      | Census                                                         | HH         |
| Saudi Arabia          | 2006      | Demographic Research Bulletin 2007                             | HH         |
| Saudi Arabia          | 1988      | Gulf Child Health Survey                                       | SBH        |
| Saudi Arabia          | 1996      | Gulf Family Health Survey                                      | CBH        |
| Saudi Arabia          | 1990      | Levels, Trends and Differentials of Infant and Child Mortality | SBH        |
| 'Asir                 | 1999-2012 | Vital Registration                                             | VR/SRS/DSP |
| Bahah                 | 1999-2012 | Vital Registration                                             | VR/SRS/DSP |
| Eastern Province      | 1999-2012 | Vital Registration                                             | VR/SRS/DSP |
| Ha'il                 | 1999-2012 | Vital Registration                                             | VR/SRS/DSP |
| Jawf                  | 1999-2012 | Vital Registration                                             | VR/SRS/DSP |
| Jizan                 | 1999-2012 | Vital Registration                                             | VR/SRS/DSP |
| Madinah               | 1999-2012 | Vital Registration                                             | VR/SRS/DSP |
| Makkah                | 1999-2012 | Vital Registration                                             | VR/SRS/DSP |
| Najran                | 1999-2012 | Vital Registration                                             | VR/SRS/DSP |
| Northern Borders      | 1999-2012 | Vital Registration                                             | VR/SRS/DSP |
| Qassim                | 1999-2012 | Vital Registration                                             | VR/SRS/DSP |
| Riyadh                | 2010-2012 | Vital Registration                                             | VR/SRS/DSP |
| Tabuk                 | 1999-2012 | Vital Registration                                             | VR/SRS/DSP |
| Sudan                 | 2010      | Multiple Indicator Cluster Survey (MICS)                       | CBH        |
| Sudan                 | 2014      | Multiple Indicator Cluster Survey (MICS)                       | CBH        |
| Syria                 | 2000-2010 | Vital Registration                                             | VR/SRS/DSP |
| Tunisia               | 1988      | Demographic and Health Survey (DHS)                            | CBH        |
| Turkey                | 1993      | Demographic and Health Survey (DHS)                            | CBH        |
| Turkey                | 1998      | Demographic and Health Survey (DHS)                            | CBH        |
| Turkey                | 2003      | Demographic and Health Survey (DHS)                            | CBH        |
| Turkey                | 2008      | Demographic and Health Survey (DHS)                            | CBH        |
| Turkey                | 2013      | Demographic and Health Survey (DHS)                            | CBH        |
| United Arab Emirates  | 2004-2007 | Vital Registration                                             | VR/SRS/DSP |
| Yemen                 | 1991      | Demographic and Health Survey (DHS)                            | CBH        |
| Yemen                 | 1997      | Demographic and Health Survey (DHS)                            | CBH        |
| Yemen                 | 2013      | Demographic and Health Survey (DHS)                            | CBH        |
| Yemen                 | 2003      | Pan Arab Project for Family Health (PAPFAM)                    | CBH        |
| Bangladesh            | 1993      | Demographic and Health Survey (DHS)                            | CBH        |
| Bangladesh            | 1996      | Demographic and Health Survey (DHS)                            | CBH        |
| Bangladesh            | 1999      | Demographic and Health Survey (DHS)                            | CBH        |
| Bangladesh            | 2004      | Demographic and Health Survey (DHS)                            | CBH        |
| Bangladesh            | 2007      | Demographic and Health Survey (DHS)                            | CBH        |
| Bangladesh            | 2011      | Demographic and Health Survey (DHS)                            | CBH        |
| Bangladesh            | 2014      | Demographic and Health Survey (DHS)                            | CBH        |
| Bhutan                | 2005      | Census                                                         | SBH        |
| Bhutan                | 1994      | Health Survey                                                  | CBH        |
| Bhutan                | 2010      | Multiple Indicator Cluster Survey (MICS)                       | SBH        |
| India                 | 1992      | Demographic and Health Survey (DHS)                            | CBH        |
| India                 | 1998      | Demographic and Health Survey (DHS)                            | CBH        |
| India                 | 2005      | Demographic and Health Survey (DHS)                            | CBH        |
| India                 | 2015      | Demographic and Health Survey (DHS)                            | CBH        |
| Andhra Pradesh        | 2015      | Demographic and Health Survey (DHS)                            | CBH        |
| Andhra Pradesh        | 2005      | Human Development Survey                                       | CBH        |
| Andhra Pradesh        | 2005      | Human Development Survey                                       | SBH        |
| Andhra Pradesh        | 2003      | India District Level Household Survey (DLHS)                   | SBH        |
| Andhra Pradesh        | 2008      | India District Level Household Survey (DLHS)                   | SBH        |
| Andhra Pradesh, Rural | 1992      | Demographic and Health Survey (DHS)                            | SBH        |
| Andhra Pradesh, Rural | 1999      | Demographic and Health Survey (DHS)                            | SBH        |
| Andhra Pradesh, Rural | 2006      | Demographic and Health Survey (DHS)                            | SBH        |
| Andhra Pradesh, Rural | 2015      | Demographic and Health Survey (DHS)                            | CBH        |
| Andhra Pradesh, Urban | 1992      | Demographic and Health Survey (DHS)                            | SBH        |
| Andhra Pradesh, Urban | 1999      | Demographic and Health Survey (DHS)                            | SBH        |

**Appendix Table 10. Under-5 mortality reference sources by source date and location, 1950-2016**

| Location                 | Source    | Source years                        | Method     |
|--------------------------|-----------|-------------------------------------|------------|
| Andhra Pradesh, Urban    | 2006      | Demographic and Health Survey (DHS) | SBH        |
| Andhra Pradesh, Urban    | 2015      | Demographic and Health Survey (DHS) | CBH        |
| Arunachal Pradesh        | 1992      | Demographic and Health Survey (DHS) | SBH        |
| Arunachal Pradesh        | 1999      | Demographic and Health Survey (DHS) | SBH        |
| Arunachal Pradesh        | 2006      | Demographic and Health Survey (DHS) | SBH        |
| Arunachal Pradesh        | 2015      | Demographic and Health Survey (DHS) | CBH        |
| Arunachal Pradesh, Rural | 1992      | Demographic and Health Survey (DHS) | SBH        |
| Arunachal Pradesh, Rural | 1993      | Demographic and Health Survey (DHS) | SBH        |
| Arunachal Pradesh, Rural | 1999      | Demographic and Health Survey (DHS) | SBH        |
| Arunachal Pradesh, Rural | 2006      | Demographic and Health Survey (DHS) | SBH        |
| Arunachal Pradesh, Rural | 2015      | Demographic and Health Survey (DHS) | CBH        |
| Arunachal Pradesh, Urban | 1992      | Demographic and Health Survey (DHS) | SBH        |
| Arunachal Pradesh, Urban | 1993      | Demographic and Health Survey (DHS) | SBH        |
| Arunachal Pradesh, Urban | 1999      | Demographic and Health Survey (DHS) | SBH        |
| Arunachal Pradesh, Urban | 2006      | Demographic and Health Survey (DHS) | SBH        |
| Arunachal Pradesh, Urban | 2015      | Demographic and Health Survey (DHS) | CBH        |
| Assam                    | 1992      | Demographic and Health Survey (DHS) | SBH        |
| Assam                    | 1999      | Demographic and Health Survey (DHS) | SBH        |
| Assam                    | 2006      | Demographic and Health Survey (DHS) | SBH        |
| Assam                    | 2015      | Demographic and Health Survey (DHS) | CBH        |
| Assam, Rural             | 1992      | Demographic and Health Survey (DHS) | SBH        |
| Assam, Rural             | 1993      | Demographic and Health Survey (DHS) | SBH        |
| Assam, Rural             | 1999      | Demographic and Health Survey (DHS) | SBH        |
| Assam, Rural             | 2006      | Demographic and Health Survey (DHS) | SBH        |
| Assam, Rural             | 2015      | Demographic and Health Survey (DHS) | CBH        |
| Assam, Urban             | 1992      | Demographic and Health Survey (DHS) | SBH        |
| Assam, Urban             | 1999      | Demographic and Health Survey (DHS) | SBH        |
| Assam, Urban             | 2006      | Demographic and Health Survey (DHS) | SBH        |
| Assam, Urban             | 2015      | Demographic and Health Survey (DHS) | CBH        |
| Bihar                    | 1992      | Demographic and Health Survey (DHS) | SBH        |
| Bihar                    | 1999      | Demographic and Health Survey (DHS) | SBH        |
| Bihar                    | 2006      | Demographic and Health Survey (DHS) | SBH        |
| Bihar                    | 2015      | Demographic and Health Survey (DHS) | CBH        |
| Bihar, Rural             | 1992      | Demographic and Health Survey (DHS) | SBH        |
| Bihar, Rural             | 1993      | Demographic and Health Survey (DHS) | SBH        |
| Bihar, Rural             | 1999      | Demographic and Health Survey (DHS) | SBH        |
| Bihar, Rural             | 2006      | Demographic and Health Survey (DHS) | SBH        |
| Bihar, Rural             | 2015      | Demographic and Health Survey (DHS) | CBH        |
| Bihar, Urban             | 1992      | Demographic and Health Survey (DHS) | SBH        |
| Bihar, Urban             | 1993      | Demographic and Health Survey (DHS) | SBH        |
| Bihar, Urban             | 1999      | Demographic and Health Survey (DHS) | SBH        |
| Bihar, Urban             | 2006      | Demographic and Health Survey (DHS) | SBH        |
| Bihar, Urban             | 2015      | Demographic and Health Survey (DHS) | CBH        |
| Bihar, Urban             | 2004-2015 | Health Survey                       | VR/SRS/DSP |
| Chhattisgarh             | 2006      | Demographic and Health Survey (DHS) | SBH        |
| Chhattisgarh             | 2015      | Demographic and Health Survey (DHS) | CBH        |
| Chhattisgarh, Rural      | 2006      | Demographic and Health Survey (DHS) | SBH        |
| Chhattisgarh, Rural      | 2015      | Demographic and Health Survey (DHS) | CBH        |
| Chhattisgarh, Urban      | 2006      | Demographic and Health Survey (DHS) | SBH        |
| Chhattisgarh, Urban      | 2015      | Demographic and Health Survey (DHS) | CBH        |
| Delhi                    | 1992      | Demographic and Health Survey (DHS) | SBH        |
| Delhi                    | 1999      | Demographic and Health Survey (DHS) | SBH        |
| Delhi                    | 2006      | Demographic and Health Survey (DHS) | SBH        |
| Delhi                    | 2015      | Demographic and Health Survey (DHS) | CBH        |
| Delhi, Rural             | 1992      | Demographic and Health Survey (DHS) | SBH        |
| Delhi, Rural             | 1993      | Demographic and Health Survey (DHS) | SBH        |
| Delhi, Rural             | 1999      | Demographic and Health Survey (DHS) | SBH        |
| Delhi, Rural             | 2006      | Demographic and Health Survey (DHS) | SBH        |
| Delhi, Urban             | 1992      | Demographic and Health Survey (DHS) | SBH        |
| Delhi, Urban             | 1993      | Demographic and Health Survey (DHS) | SBH        |
| Delhi, Urban             | 1999      | Demographic and Health Survey (DHS) | SBH        |
| Delhi, Urban             | 2006      | Demographic and Health Survey (DHS) | SBH        |
| Delhi, Urban             | 2015      | Demographic and Health Survey (DHS) | CBH        |
| Goa                      | 1992      | Demographic and Health Survey (DHS) | SBH        |
| Goa                      | 1999      | Demographic and Health Survey (DHS) | SBH        |
| Goa                      | 2006      | Demographic and Health Survey (DHS) | SBH        |
| Goa                      | 2015      | Demographic and Health Survey (DHS) | CBH        |

**Appendix Table 10. Under-5 mortality reference sources by source date and location, 1950-2016**

| Location                 | Source | Source years                        | Method |
|--------------------------|--------|-------------------------------------|--------|
| Goa, Rural               | 1992   | Demographic and Health Survey (DHS) | SBH    |
| Goa, Rural               | 1999   | Demographic and Health Survey (DHS) | SBH    |
| Goa, Rural               | 2006   | Demographic and Health Survey (DHS) | SBH    |
| Goa, Urban               | 1992   | Demographic and Health Survey (DHS) | SBH    |
| Goa, Urban               | 1993   | Demographic and Health Survey (DHS) | SBH    |
| Goa, Urban               | 1999   | Demographic and Health Survey (DHS) | SBH    |
| Goa, Urban               | 2006   | Demographic and Health Survey (DHS) | SBH    |
| Gujarat                  | 1992   | Demographic and Health Survey (DHS) | SBH    |
| Gujarat                  | 1999   | Demographic and Health Survey (DHS) | SBH    |
| Gujarat                  | 2006   | Demographic and Health Survey (DHS) | SBH    |
| Gujarat                  | 2015   | Demographic and Health Survey (DHS) | CBH    |
| Gujarat, Rural           | 1992   | Demographic and Health Survey (DHS) | SBH    |
| Gujarat, Rural           | 1993   | Demographic and Health Survey (DHS) | SBH    |
| Gujarat, Rural           | 1999   | Demographic and Health Survey (DHS) | SBH    |
| Gujarat, Rural           | 2006   | Demographic and Health Survey (DHS) | SBH    |
| Gujarat, Rural           | 2015   | Demographic and Health Survey (DHS) | CBH    |
| Gujarat, Urban           | 1992   | Demographic and Health Survey (DHS) | SBH    |
| Gujarat, Urban           | 1993   | Demographic and Health Survey (DHS) | SBH    |
| Gujarat, Urban           | 1999   | Demographic and Health Survey (DHS) | SBH    |
| Gujarat, Urban           | 2006   | Demographic and Health Survey (DHS) | SBH    |
| Gujarat, Urban           | 2015   | Demographic and Health Survey (DHS) | CBH    |
| Haryana                  | 1992   | Demographic and Health Survey (DHS) | SBH    |
| Haryana                  | 1999   | Demographic and Health Survey (DHS) | SBH    |
| Haryana                  | 2006   | Demographic and Health Survey (DHS) | SBH    |
| Haryana                  | 2015   | Demographic and Health Survey (DHS) | CBH    |
| Haryana, Rural           | 1992   | Demographic and Health Survey (DHS) | SBH    |
| Haryana, Rural           | 1993   | Demographic and Health Survey (DHS) | SBH    |
| Haryana, Rural           | 1999   | Demographic and Health Survey (DHS) | SBH    |
| Haryana, Rural           | 2006   | Demographic and Health Survey (DHS) | SBH    |
| Haryana, Rural           | 2015   | Demographic and Health Survey (DHS) | CBH    |
| Haryana, Urban           | 1992   | Demographic and Health Survey (DHS) | SBH    |
| Haryana, Urban           | 1993   | Demographic and Health Survey (DHS) | SBH    |
| Haryana, Urban           | 1999   | Demographic and Health Survey (DHS) | SBH    |
| Haryana, Urban           | 2006   | Demographic and Health Survey (DHS) | SBH    |
| Haryana, Urban           | 2015   | Demographic and Health Survey (DHS) | CBH    |
| Himachal Pradesh         | 1992   | Demographic and Health Survey (DHS) | SBH    |
| Himachal Pradesh         | 1999   | Demographic and Health Survey (DHS) | SBH    |
| Himachal Pradesh         | 2006   | Demographic and Health Survey (DHS) | SBH    |
| Himachal Pradesh         | 2015   | Demographic and Health Survey (DHS) | CBH    |
| Himachal Pradesh, Rural  | 1992   | Demographic and Health Survey (DHS) | SBH    |
| Himachal Pradesh, Rural  | 1999   | Demographic and Health Survey (DHS) | SBH    |
| Himachal Pradesh, Rural  | 2006   | Demographic and Health Survey (DHS) | SBH    |
| Himachal Pradesh, Rural  | 2015   | Demographic and Health Survey (DHS) | CBH    |
| Himachal Pradesh, Urban  | 1992   | Demographic and Health Survey (DHS) | SBH    |
| Himachal Pradesh, Urban  | 1999   | Demographic and Health Survey (DHS) | SBH    |
| Himachal Pradesh, Urban  | 2006   | Demographic and Health Survey (DHS) | SBH    |
| Jammu and Kashmir        | 1992   | Demographic and Health Survey (DHS) | SBH    |
| Jammu and Kashmir        | 1999   | Demographic and Health Survey (DHS) | SBH    |
| Jammu and Kashmir        | 2006   | Demographic and Health Survey (DHS) | SBH    |
| Jammu and Kashmir        | 2015   | Demographic and Health Survey (DHS) | CBH    |
| Jammu and Kashmir, Rural | 1992   | Demographic and Health Survey (DHS) | SBH    |
| Jammu and Kashmir, Rural | 1993   | Demographic and Health Survey (DHS) | SBH    |
| Jammu and Kashmir, Rural | 1999   | Demographic and Health Survey (DHS) | SBH    |
| Jammu and Kashmir, Rural | 2006   | Demographic and Health Survey (DHS) | SBH    |
| Jammu and Kashmir, Rural | 2015   | Demographic and Health Survey (DHS) | CBH    |
| Jammu and Kashmir, Urban | 1992   | Demographic and Health Survey (DHS) | SBH    |
| Jammu and Kashmir, Urban | 1993   | Demographic and Health Survey (DHS) | SBH    |
| Jammu and Kashmir, Urban | 1999   | Demographic and Health Survey (DHS) | SBH    |
| Jammu and Kashmir, Urban | 2006   | Demographic and Health Survey (DHS) | SBH    |
| Jammu and Kashmir, Urban | 2015   | Demographic and Health Survey (DHS) | CBH    |
| Jharkhand                | 2006   | Demographic and Health Survey (DHS) | SBH    |
| Jharkhand                | 2015   | Demographic and Health Survey (DHS) | CBH    |
| Jharkhand, Rural         | 2006   | Demographic and Health Survey (DHS) | SBH    |
| Jharkhand, Rural         | 2015   | Demographic and Health Survey (DHS) | CBH    |
| Jharkhand, Urban         | 2006   | Demographic and Health Survey (DHS) | SBH    |
| Jharkhand, Urban         | 2015   | Demographic and Health Survey (DHS) | CBH    |
| Karnataka                | 1992   | Demographic and Health Survey (DHS) | SBH    |

**Appendix Table 10. Under-5 mortality reference sources by source date and location, 1950-2016**

| Location              | Source | Source years                        | Method |
|-----------------------|--------|-------------------------------------|--------|
| Karnataka             | 1999   | Demographic and Health Survey (DHS) | SBH    |
| Karnataka             | 2006   | Demographic and Health Survey (DHS) | SBH    |
| Karnataka             | 2015   | Demographic and Health Survey (DHS) | CBH    |
| Karnataka, Rural      | 1992   | Demographic and Health Survey (DHS) | SBH    |
| Karnataka, Rural      | 1999   | Demographic and Health Survey (DHS) | SBH    |
| Karnataka, Rural      | 2006   | Demographic and Health Survey (DHS) | SBH    |
| Karnataka, Rural      | 2015   | Demographic and Health Survey (DHS) | CBH    |
| Karnataka, Urban      | 1992   | Demographic and Health Survey (DHS) | SBH    |
| Karnataka, Urban      | 1993   | Demographic and Health Survey (DHS) | SBH    |
| Karnataka, Urban      | 1999   | Demographic and Health Survey (DHS) | SBH    |
| Karnataka, Urban      | 2006   | Demographic and Health Survey (DHS) | SBH    |
| Karnataka, Urban      | 2015   | Demographic and Health Survey (DHS) | CBH    |
| Kerala                | 1992   | Demographic and Health Survey (DHS) | SBH    |
| Kerala                | 1999   | Demographic and Health Survey (DHS) | SBH    |
| Kerala                | 2006   | Demographic and Health Survey (DHS) | SBH    |
| Kerala                | 2015   | Demographic and Health Survey (DHS) | CBH    |
| Kerala, Rural         | 1992   | Demographic and Health Survey (DHS) | SBH    |
| Kerala, Rural         | 1999   | Demographic and Health Survey (DHS) | SBH    |
| Kerala, Rural         | 2006   | Demographic and Health Survey (DHS) | SBH    |
| Kerala, Rural         | 2015   | Demographic and Health Survey (DHS) | CBH    |
| Kerala, Urban         | 1992   | Demographic and Health Survey (DHS) | SBH    |
| Kerala, Urban         | 1999   | Demographic and Health Survey (DHS) | SBH    |
| Kerala, Urban         | 2006   | Demographic and Health Survey (DHS) | SBH    |
| Kerala, Urban         | 2015   | Demographic and Health Survey (DHS) | CBH    |
| Madhya Pradesh        | 1992   | Demographic and Health Survey (DHS) | SBH    |
| Madhya Pradesh        | 1999   | Demographic and Health Survey (DHS) | SBH    |
| Madhya Pradesh        | 2006   | Demographic and Health Survey (DHS) | SBH    |
| Madhya Pradesh        | 2015   | Demographic and Health Survey (DHS) | CBH    |
| Madhya Pradesh, Rural | 1992   | Demographic and Health Survey (DHS) | SBH    |
| Madhya Pradesh, Rural | 1999   | Demographic and Health Survey (DHS) | SBH    |
| Madhya Pradesh, Rural | 2006   | Demographic and Health Survey (DHS) | SBH    |
| Madhya Pradesh, Rural | 2015   | Demographic and Health Survey (DHS) | CBH    |
| Madhya Pradesh, Urban | 1992   | Demographic and Health Survey (DHS) | SBH    |
| Madhya Pradesh, Urban | 1999   | Demographic and Health Survey (DHS) | SBH    |
| Madhya Pradesh, Urban | 2006   | Demographic and Health Survey (DHS) | SBH    |
| Madhya Pradesh, Urban | 2015   | Demographic and Health Survey (DHS) | CBH    |
| Maharashtra           | 1992   | Demographic and Health Survey (DHS) | SBH    |
| Maharashtra           | 1999   | Demographic and Health Survey (DHS) | SBH    |
| Maharashtra           | 2006   | Demographic and Health Survey (DHS) | SBH    |
| Maharashtra           | 2015   | Demographic and Health Survey (DHS) | CBH    |
| Maharashtra, Rural    | 1992   | Demographic and Health Survey (DHS) | SBH    |
| Maharashtra, Rural    | 1999   | Demographic and Health Survey (DHS) | SBH    |
| Maharashtra, Rural    | 2006   | Demographic and Health Survey (DHS) | SBH    |
| Maharashtra, Rural    | 2015   | Demographic and Health Survey (DHS) | CBH    |
| Maharashtra, Urban    | 1992   | Demographic and Health Survey (DHS) | SBH    |
| Maharashtra, Urban    | 1993   | Demographic and Health Survey (DHS) | SBH    |
| Maharashtra, Urban    | 1999   | Demographic and Health Survey (DHS) | SBH    |
| Maharashtra, Urban    | 2006   | Demographic and Health Survey (DHS) | SBH    |
| Maharashtra, Urban    | 2015   | Demographic and Health Survey (DHS) | CBH    |
| Manipur               | 1992   | Demographic and Health Survey (DHS) | SBH    |
| Manipur               | 1999   | Demographic and Health Survey (DHS) | SBH    |
| Manipur               | 2006   | Demographic and Health Survey (DHS) | SBH    |
| Manipur               | 2015   | Demographic and Health Survey (DHS) | CBH    |
| Manipur, Rural        | 1992   | Demographic and Health Survey (DHS) | SBH    |
| Manipur, Rural        | 1993   | Demographic and Health Survey (DHS) | SBH    |
| Manipur, Rural        | 1999   | Demographic and Health Survey (DHS) | SBH    |
| Manipur, Rural        | 2006   | Demographic and Health Survey (DHS) | SBH    |
| Manipur, Rural        | 2015   | Demographic and Health Survey (DHS) | CBH    |
| Manipur, Urban        | 1992   | Demographic and Health Survey (DHS) | SBH    |
| Manipur, Urban        | 1993   | Demographic and Health Survey (DHS) | SBH    |
| Manipur, Urban        | 1999   | Demographic and Health Survey (DHS) | SBH    |
| Manipur, Urban        | 2006   | Demographic and Health Survey (DHS) | SBH    |
| Manipur, Urban        | 2015   | Demographic and Health Survey (DHS) | CBH    |
| Meghalaya             | 1992   | Demographic and Health Survey (DHS) | SBH    |
| Meghalaya             | 1999   | Demographic and Health Survey (DHS) | SBH    |
| Meghalaya             | 2006   | Demographic and Health Survey (DHS) | SBH    |
| Meghalaya             | 2015   | Demographic and Health Survey (DHS) | CBH    |

**Appendix Table 10. Under-5 mortality reference sources by source date and location, 1950-2016**

| Location         | Source | Source years                        | Method |
|------------------|--------|-------------------------------------|--------|
| Meghalaya, Rural | 1992   | Demographic and Health Survey (DHS) | SBH    |
| Meghalaya, Rural | 1993   | Demographic and Health Survey (DHS) | SBH    |
| Meghalaya, Rural | 1999   | Demographic and Health Survey (DHS) | SBH    |
| Meghalaya, Rural | 2006   | Demographic and Health Survey (DHS) | SBH    |
| Meghalaya, Rural | 2015   | Demographic and Health Survey (DHS) | CBH    |
| Meghalaya, Urban | 1992   | Demographic and Health Survey (DHS) | SBH    |
| Meghalaya, Urban | 1993   | Demographic and Health Survey (DHS) | SBH    |
| Meghalaya, Urban | 1999   | Demographic and Health Survey (DHS) | SBH    |
| Meghalaya, Urban | 2006   | Demographic and Health Survey (DHS) | SBH    |
| Meghalaya, Urban | 2015   | Demographic and Health Survey (DHS) | CBH    |
| Mizoram          | 1992   | Demographic and Health Survey (DHS) | SBH    |
| Mizoram          | 1999   | Demographic and Health Survey (DHS) | SBH    |
| Mizoram          | 2006   | Demographic and Health Survey (DHS) | SBH    |
| Mizoram          | 2015   | Demographic and Health Survey (DHS) | CBH    |
| Mizoram, Rural   | 1992   | Demographic and Health Survey (DHS) | SBH    |
| Mizoram, Rural   | 1993   | Demographic and Health Survey (DHS) | SBH    |
| Mizoram, Rural   | 1999   | Demographic and Health Survey (DHS) | SBH    |
| Mizoram, Rural   | 2006   | Demographic and Health Survey (DHS) | SBH    |
| Mizoram, Rural   | 2015   | Demographic and Health Survey (DHS) | CBH    |
| Mizoram, Urban   | 1992   | Demographic and Health Survey (DHS) | SBH    |
| Mizoram, Urban   | 1993   | Demographic and Health Survey (DHS) | SBH    |
| Mizoram, Urban   | 1999   | Demographic and Health Survey (DHS) | SBH    |
| Mizoram, Urban   | 2006   | Demographic and Health Survey (DHS) | SBH    |
| Mizoram, Urban   | 2015   | Demographic and Health Survey (DHS) | CBH    |
| Nagaland         | 1999   | Demographic and Health Survey (DHS) | SBH    |
| Nagaland         | 2006   | Demographic and Health Survey (DHS) | SBH    |
| Nagaland         | 2015   | Demographic and Health Survey (DHS) | CBH    |
| Nagaland, Rural  | 1999   | Demographic and Health Survey (DHS) | SBH    |
| Nagaland, Rural  | 2006   | Demographic and Health Survey (DHS) | SBH    |
| Nagaland, Rural  | 2015   | Demographic and Health Survey (DHS) | CBH    |
| Nagaland, Urban  | 1992   | Demographic and Health Survey (DHS) | SBH    |
| Nagaland, Urban  | 1993   | Demographic and Health Survey (DHS) | SBH    |
| Nagaland, Urban  | 1999   | Demographic and Health Survey (DHS) | SBH    |
| Nagaland, Urban  | 2006   | Demographic and Health Survey (DHS) | SBH    |
| Nagaland, Urban  | 2015   | Demographic and Health Survey (DHS) | CBH    |
| Odisha           | 1992   | Demographic and Health Survey (DHS) | SBH    |
| Odisha           | 1999   | Demographic and Health Survey (DHS) | SBH    |
| Odisha           | 2006   | Demographic and Health Survey (DHS) | SBH    |
| Odisha           | 2015   | Demographic and Health Survey (DHS) | CBH    |
| Odisha, Rural    | 1992   | Demographic and Health Survey (DHS) | SBH    |
| Odisha, Rural    | 1993   | Demographic and Health Survey (DHS) | SBH    |
| Odisha, Rural    | 1999   | Demographic and Health Survey (DHS) | SBH    |
| Odisha, Rural    | 2006   | Demographic and Health Survey (DHS) | SBH    |
| Odisha, Rural    | 2015   | Demographic and Health Survey (DHS) | CBH    |
| Odisha, Urban    | 1992   | Demographic and Health Survey (DHS) | SBH    |
| Odisha, Urban    | 1993   | Demographic and Health Survey (DHS) | SBH    |
| Odisha, Urban    | 1999   | Demographic and Health Survey (DHS) | SBH    |
| Odisha, Urban    | 2006   | Demographic and Health Survey (DHS) | SBH    |
| Odisha, Urban    | 2015   | Demographic and Health Survey (DHS) | CBH    |
| Punjab           | 1992   | Demographic and Health Survey (DHS) | SBH    |
| Punjab           | 1999   | Demographic and Health Survey (DHS) | SBH    |
| Punjab           | 2006   | Demographic and Health Survey (DHS) | SBH    |
| Punjab           | 2015   | Demographic and Health Survey (DHS) | CBH    |
| Punjab, Rural    | 1992   | Demographic and Health Survey (DHS) | SBH    |
| Punjab, Rural    | 1993   | Demographic and Health Survey (DHS) | SBH    |
| Punjab, Rural    | 1999   | Demographic and Health Survey (DHS) | SBH    |
| Punjab, Rural    | 2006   | Demographic and Health Survey (DHS) | SBH    |
| Punjab, Rural    | 2015   | Demographic and Health Survey (DHS) | CBH    |
| Punjab, Urban    | 1992   | Demographic and Health Survey (DHS) | SBH    |
| Punjab, Urban    | 1993   | Demographic and Health Survey (DHS) | SBH    |
| Punjab, Urban    | 1999   | Demographic and Health Survey (DHS) | SBH    |
| Punjab, Urban    | 2006   | Demographic and Health Survey (DHS) | SBH    |
| Punjab, Urban    | 2015   | Demographic and Health Survey (DHS) | CBH    |
| Rajasthan        | 1999   | Demographic and Health Survey (DHS) | SBH    |
| Rajasthan        | 2006   | Demographic and Health Survey (DHS) | SBH    |
| Rajasthan        | 2015   | Demographic and Health Survey (DHS) | CBH    |
| Rajasthan, Rural | 1992   | Demographic and Health Survey (DHS) | SBH    |

**Appendix Table 10. Under-5 mortality reference sources by source date and location, 1950-2016**

| Location             | Source | Source years                                 | Method |
|----------------------|--------|----------------------------------------------|--------|
| Rajasthan, Rural     | 1993   | Demographic and Health Survey (DHS)          | SBH    |
| Rajasthan, Rural     | 1999   | Demographic and Health Survey (DHS)          | SBH    |
| Rajasthan, Rural     | 2006   | Demographic and Health Survey (DHS)          | SBH    |
| Rajasthan, Rural     | 2015   | Demographic and Health Survey (DHS)          | CBH    |
| Rajasthan, Urban     | 1992   | Demographic and Health Survey (DHS)          | SBH    |
| Rajasthan, Urban     | 1993   | Demographic and Health Survey (DHS)          | SBH    |
| Rajasthan, Urban     | 1999   | Demographic and Health Survey (DHS)          | SBH    |
| Rajasthan, Urban     | 2006   | Demographic and Health Survey (DHS)          | SBH    |
| Rajasthan, Urban     | 2015   | Demographic and Health Survey (DHS)          | CBH    |
| Sikkim               | 1999   | Demographic and Health Survey (DHS)          | SBH    |
| Sikkim               | 2006   | Demographic and Health Survey (DHS)          | SBH    |
| Sikkim               | 2015   | Demographic and Health Survey (DHS)          | CBH    |
| Sikkim, Rural        | 1999   | Demographic and Health Survey (DHS)          | SBH    |
| Sikkim, Rural        | 2006   | Demographic and Health Survey (DHS)          | SBH    |
| Sikkim, Rural        | 2015   | Demographic and Health Survey (DHS)          | CBH    |
| Sikkim, Urban        | 1999   | Demographic and Health Survey (DHS)          | SBH    |
| Sikkim, Urban        | 2006   | Demographic and Health Survey (DHS)          | SBH    |
| Sikkim, Urban        | 2015   | Demographic and Health Survey (DHS)          | CBH    |
| Tamil Nadu           | 1992   | Demographic and Health Survey (DHS)          | SBH    |
| Tamil Nadu           | 1999   | Demographic and Health Survey (DHS)          | SBH    |
| Tamil Nadu           | 2006   | Demographic and Health Survey (DHS)          | SBH    |
| Tamil Nadu           | 2015   | Demographic and Health Survey (DHS)          | CBH    |
| Tamil Nadu, Rural    | 1992   | Demographic and Health Survey (DHS)          | SBH    |
| Tamil Nadu, Rural    | 1999   | Demographic and Health Survey (DHS)          | SBH    |
| Tamil Nadu, Rural    | 2006   | Demographic and Health Survey (DHS)          | SBH    |
| Tamil Nadu, Rural    | 2015   | Demographic and Health Survey (DHS)          | CBH    |
| Tamil Nadu, Urban    | 1992   | Demographic and Health Survey (DHS)          | SBH    |
| Tamil Nadu, Urban    | 1999   | Demographic and Health Survey (DHS)          | SBH    |
| Tamil Nadu, Urban    | 2006   | Demographic and Health Survey (DHS)          | SBH    |
| Tamil Nadu, Urban    | 2015   | Demographic and Health Survey (DHS)          | CBH    |
| Telangana            | 2015   | Demographic and Health Survey (DHS)          | CBH    |
| Telangana            | 2005   | Human Development Survey                     | CBH    |
| Telangana            | 2005   | Human Development Survey                     | SBH    |
| Telangana            | 2003   | India District Level Household Survey (DLHS) | SBH    |
| Telangana            | 2008   | India District Level Household Survey (DLHS) | SBH    |
| Telangana, Rural     | 2015   | Demographic and Health Survey (DHS)          | CBH    |
| Telangana, Rural     | 2003   | India District Level Household Survey (DLHS) | SBH    |
| Telangana, Rural     | 2008   | India District Level Household Survey (DLHS) | SBH    |
| Telangana, Urban     | 2015   | Demographic and Health Survey (DHS)          | CBH    |
| Telangana, Urban     | 2003   | India District Level Household Survey (DLHS) | SBH    |
| Telangana, Urban     | 2008   | India District Level Household Survey (DLHS) | SBH    |
| Tripura              | 1992   | Demographic and Health Survey (DHS)          | SBH    |
| Tripura              | 1999   | Demographic and Health Survey (DHS)          | SBH    |
| Tripura              | 2006   | Demographic and Health Survey (DHS)          | SBH    |
| Tripura              | 2015   | Demographic and Health Survey (DHS)          | CBH    |
| Tripura, Rural       | 1992   | Demographic and Health Survey (DHS)          | SBH    |
| Tripura, Rural       | 1993   | Demographic and Health Survey (DHS)          | SBH    |
| Tripura, Rural       | 1999   | Demographic and Health Survey (DHS)          | SBH    |
| Tripura, Rural       | 2006   | Demographic and Health Survey (DHS)          | SBH    |
| Tripura, Rural       | 2015   | Demographic and Health Survey (DHS)          | CBH    |
| Tripura, Urban       | 1992   | Demographic and Health Survey (DHS)          | SBH    |
| Tripura, Urban       | 1993   | Demographic and Health Survey (DHS)          | SBH    |
| Tripura, Urban       | 1999   | Demographic and Health Survey (DHS)          | SBH    |
| Tripura, Urban       | 2006   | Demographic and Health Survey (DHS)          | SBH    |
| Tripura, Urban       | 2015   | Demographic and Health Survey (DHS)          | CBH    |
| Uttar Pradesh        | 1992   | Demographic and Health Survey (DHS)          | SBH    |
| Uttar Pradesh        | 1999   | Demographic and Health Survey (DHS)          | SBH    |
| Uttar Pradesh        | 2006   | Demographic and Health Survey (DHS)          | SBH    |
| Uttar Pradesh        | 2015   | Demographic and Health Survey (DHS)          | CBH    |
| Uttar Pradesh, Rural | 1992   | Demographic and Health Survey (DHS)          | SBH    |
| Uttar Pradesh, Rural | 1999   | Demographic and Health Survey (DHS)          | SBH    |
| Uttar Pradesh, Rural | 2006   | Demographic and Health Survey (DHS)          | SBH    |
| Uttar Pradesh, Rural | 2015   | Demographic and Health Survey (DHS)          | CBH    |
| Uttar Pradesh, Urban | 1992   | Demographic and Health Survey (DHS)          | SBH    |
| Uttar Pradesh, Urban | 1999   | Demographic and Health Survey (DHS)          | SBH    |
| Uttar Pradesh, Urban | 2006   | Demographic and Health Survey (DHS)          | SBH    |
| Uttar Pradesh, Urban | 2015   | Demographic and Health Survey (DHS)          | CBH    |

**Appendix Table 10. Under-5 mortality reference sources by source date and location, 1950-2016**

| Location                         | Source | Source years                                 | Method |
|----------------------------------|--------|----------------------------------------------|--------|
| Uttarakhand                      | 2006   | Demographic and Health Survey (DHS)          | SBH    |
| Uttarakhand                      | 2015   | Demographic and Health Survey (DHS)          | CBH    |
| Uttarakhand, Rural               | 2006   | Demographic and Health Survey (DHS)          | SBH    |
| Uttarakhand, Rural               | 2015   | Demographic and Health Survey (DHS)          | CBH    |
| Uttarakhand, Urban               | 2006   | Demographic and Health Survey (DHS)          | SBH    |
| Uttarakhand, Urban               | 2015   | Demographic and Health Survey (DHS)          | CBH    |
| West Bengal                      | 1992   | Demographic and Health Survey (DHS)          | SBH    |
| West Bengal                      | 1999   | Demographic and Health Survey (DHS)          | SBH    |
| West Bengal                      | 2006   | Demographic and Health Survey (DHS)          | SBH    |
| West Bengal                      | 2015   | Demographic and Health Survey (DHS)          | CBH    |
| West Bengal, Rural               | 1992   | Demographic and Health Survey (DHS)          | SBH    |
| West Bengal, Rural               | 1999   | Demographic and Health Survey (DHS)          | SBH    |
| West Bengal, Rural               | 2006   | Demographic and Health Survey (DHS)          | SBH    |
| West Bengal, Rural               | 2015   | Demographic and Health Survey (DHS)          | CBH    |
| West Bengal, Urban               | 1992   | Demographic and Health Survey (DHS)          | SBH    |
| West Bengal, Urban               | 1999   | Demographic and Health Survey (DHS)          | SBH    |
| West Bengal, Urban               | 2006   | Demographic and Health Survey (DHS)          | SBH    |
| West Bengal, Urban               | 2015   | Demographic and Health Survey (DHS)          | CBH    |
| The Six Minor Territories        | 2001   | Census                                       | SBH    |
| The Six Minor Territories        | 2005   | Human Development Survey                     | CBH    |
| The Six Minor Territories        | 2005   | Human Development Survey                     | SBH    |
| The Six Minor Territories        | 2008   | India District Level Household Survey (DLHS) | SBH    |
| The Six Minor Territories        | 2013   | India District Level Household Survey (DLHS) | SBH    |
| The Six Minor Territories, Rural | 2001   | Census                                       | SBH    |
| The Six Minor Territories, Rural | 2008   | India District Level Household Survey (DLHS) | SBH    |
| The Six Minor Territories, Rural | 2013   | India District Level Household Survey (DLHS) | SBH    |
| The Six Minor Territories, Urban | 2001   | Census                                       | SBH    |
| The Six Minor Territories, Urban | 2005   | Human Development Survey                     | CBH    |
| The Six Minor Territories, Urban | 2008   | India District Level Household Survey (DLHS) | SBH    |
| The Six Minor Territories, Urban | 2013   | India District Level Household Survey (DLHS) | SBH    |
| Nepal                            | 1996   | Demographic and Health Survey (DHS)          | CBH    |
| Nepal                            | 2001   | Demographic and Health Survey (DHS)          | CBH    |
| Nepal                            | 2006   | Demographic and Health Survey (DHS)          | CBH    |
| Nepal                            | 2011   | Demographic and Health Survey (DHS)          | CBH    |
| Pakistan                         | 1990   | Demographic and Health Survey (DHS)          | CBH    |
| Pakistan                         | 2006   | Demographic and Health Survey (DHS)          | CBH    |
| Pakistan                         | 2012   | Demographic and Health Survey (DHS)          | CBH    |
| Angola                           | 2016   | Demographic and Health Survey (DHS)          | CBH    |
| Central African Republic         | 1994   | Demographic and Health Survey (DHS)          | CBH    |
| Central African Republic         | 1994   | Demographic and Health Survey (DHS)          | SBH    |
| Central African Republic         | 2000   | Multiple Indicator Cluster Survey (MICS)     | SBH    |
| Central African Republic         | 2006   | Multiple Indicator Cluster Survey (MICS)     | SBH    |
| Central African Republic         | 2010   | Multiple Indicator Cluster Survey (MICS)     | SBH    |
| Congo                            | 2005   | Demographic and Health Survey (DHS)          | CBH    |
| Congo                            | 2011   | Demographic and Health Survey (DHS)          | CBH    |
| Democratic Republic of the Congo | 2007   | Demographic and Health Survey (DHS)          | CBH    |
| Democratic Republic of the Congo | 2013   | Demographic and Health Survey (DHS)          | CBH    |
| Equatorial Guinea                | 2011   | Demographic and Health Survey (DHS)          | CBH    |
| Equatorial Guinea                | 2000   | Multiple Indicator Cluster Survey (MICS)     | SBH    |
| Gabon                            | 2000   | Demographic and Health Survey (DHS)          | CBH    |
| Gabon                            | 2012   | Demographic and Health Survey (DHS)          | CBH    |
| Burundi                          | 1987   | Demographic and Health Survey (DHS)          | CBH    |
| Burundi                          | 2010   | Demographic and Health Survey (DHS)          | CBH    |
| Comoros                          | 1996   | Demographic and Health Survey (DHS)          | CBH    |
| Djibouti                         | 1991   | Demographic Survey                           | SBH    |
| Djibouti                         | 2006   | Multiple Indicator Cluster Survey (MICS)     | SBH    |
| Djibouti                         | 2002   | Pan Arab Project for Family Health (PAPFAM)  | SBH    |
| Djibouti                         | 2002   | Pan Arab Project for Family Health (PAPFAM)  | CBH    |
| Eritrea                          | 1995   | Demographic and Health Survey (DHS)          | CBH    |
| Eritrea                          | 2002   | Demographic and Health Survey (DHS)          | CBH    |
| Ethiopia                         | 2000   | Demographic and Health Survey (DHS)          | CBH    |
| Ethiopia                         | 2005   | Demographic and Health Survey (DHS)          | CBH    |
| Ethiopia                         | 2010   | Demographic and Health Survey (DHS)          | CBH    |
| Ethiopia                         | 2016   | Demographic and Health Survey (DHS)          | CBH    |
| Kenya                            | 1988   | Demographic and Health Survey (DHS)          | CBH    |
| Kenya                            | 1993   | Demographic and Health Survey (DHS)          | CBH    |
| Kenya                            | 1998   | Demographic and Health Survey (DHS)          | CBH    |



**Appendix Table 10. Under-5 mortality reference sources by source date and location, 1950-2016**

| Location    | Source | Source years                        | Method |
|-------------|--------|-------------------------------------|--------|
| Kenya       | 2003   | Demographic and Health Survey (DHS) | CBH    |
| Kenya       | 2008   | Demographic and Health Survey (DHS) | CBH    |
| Kenya       | 2014   | Demographic and Health Survey (DHS) | CBH    |
| Central     | 1989   | Demographic and Health Survey (DHS) | SBH    |
| Central     | 1993   | Demographic and Health Survey (DHS) | SBH    |
| Central     | 1998   | Demographic and Health Survey (DHS) | SBH    |
| Central     | 2003   | Demographic and Health Survey (DHS) | SBH    |
| Central     | 2009   | Demographic and Health Survey (DHS) | SBH    |
| Central     | 2014   | Demographic and Health Survey (DHS) | SBH    |
| Kiambu      | 1988   | Demographic and Health Survey (DHS) | CBH    |
| Kiambu      | 1993   | Demographic and Health Survey (DHS) | CBH    |
| Kiambu      | 1998   | Demographic and Health Survey (DHS) | CBH    |
| Kiambu      | 2003   | Demographic and Health Survey (DHS) | CBH    |
| Kiambu      | 2014   | Demographic and Health Survey (DHS) | CBH    |
| Kirinyaga   | 1988   | Demographic and Health Survey (DHS) | CBH    |
| Kirinyaga   | 1998   | Demographic and Health Survey (DHS) | CBH    |
| Kirinyaga   | 2003   | Demographic and Health Survey (DHS) | CBH    |
| Kirinyaga   | 2008   | Demographic and Health Survey (DHS) | CBH    |
| Kirinyaga   | 2014   | Demographic and Health Survey (DHS) | CBH    |
| Murang'a    | 1988   | Demographic and Health Survey (DHS) | CBH    |
| Murang'a    | 1993   | Demographic and Health Survey (DHS) | CBH    |
| Murang'a    | 1998   | Demographic and Health Survey (DHS) | CBH    |
| Murang'a    | 2003   | Demographic and Health Survey (DHS) | CBH    |
| Murang'a    | 2014   | Demographic and Health Survey (DHS) | CBH    |
| Nyandarua   | 1988   | Demographic and Health Survey (DHS) | CBH    |
| Nyandarua   | 1993   | Demographic and Health Survey (DHS) | CBH    |
| Nyandarua   | 1998   | Demographic and Health Survey (DHS) | CBH    |
| Nyandarua   | 2003   | Demographic and Health Survey (DHS) | CBH    |
| Nyandarua   | 2008   | Demographic and Health Survey (DHS) | CBH    |
| Nyandarua   | 2014   | Demographic and Health Survey (DHS) | CBH    |
| Nyeri       | 1988   | Demographic and Health Survey (DHS) | CBH    |
| Nyeri       | 1993   | Demographic and Health Survey (DHS) | CBH    |
| Nyeri       | 1998   | Demographic and Health Survey (DHS) | CBH    |
| Nyeri       | 2003   | Demographic and Health Survey (DHS) | CBH    |
| Nyeri       | 2008   | Demographic and Health Survey (DHS) | CBH    |
| Nyeri       | 2014   | Demographic and Health Survey (DHS) | CBH    |
| Coast       | 1989   | Demographic and Health Survey (DHS) | SBH    |
| Coast       | 1993   | Demographic and Health Survey (DHS) | SBH    |
| Coast       | 1998   | Demographic and Health Survey (DHS) | SBH    |
| Coast       | 2003   | Demographic and Health Survey (DHS) | SBH    |
| Coast       | 2009   | Demographic and Health Survey (DHS) | SBH    |
| Coast       | 2014   | Demographic and Health Survey (DHS) | SBH    |
| Kilifi      | 1988   | Demographic and Health Survey (DHS) | CBH    |
| Kilifi      | 1993   | Demographic and Health Survey (DHS) | CBH    |
| Kilifi      | 1998   | Demographic and Health Survey (DHS) | CBH    |
| Kilifi      | 2003   | Demographic and Health Survey (DHS) | CBH    |
| Kilifi      | 2008   | Demographic and Health Survey (DHS) | CBH    |
| Kilifi      | 2014   | Demographic and Health Survey (DHS) | CBH    |
| Kwale       | 1988   | Demographic and Health Survey (DHS) | CBH    |
| Kwale       | 1993   | Demographic and Health Survey (DHS) | CBH    |
| Kwale       | 1998   | Demographic and Health Survey (DHS) | CBH    |
| Kwale       | 2003   | Demographic and Health Survey (DHS) | CBH    |
| Kwale       | 2008   | Demographic and Health Survey (DHS) | CBH    |
| Kwale       | 2014   | Demographic and Health Survey (DHS) | CBH    |
| Lamu        | 1993   | Demographic and Health Survey (DHS) | CBH    |
| Lamu        | 2003   | Demographic and Health Survey (DHS) | CBH    |
| Lamu        | 2008   | Demographic and Health Survey (DHS) | CBH    |
| Lamu        | 2014   | Demographic and Health Survey (DHS) | CBH    |
| Mombasa     | 1988   | Demographic and Health Survey (DHS) | CBH    |
| Mombasa     | 1993   | Demographic and Health Survey (DHS) | CBH    |
| Mombasa     | 1998   | Demographic and Health Survey (DHS) | CBH    |
| Mombasa     | 2003   | Demographic and Health Survey (DHS) | CBH    |
| Mombasa     | 2008   | Demographic and Health Survey (DHS) | CBH    |
| Mombasa     | 2014   | Demographic and Health Survey (DHS) | CBH    |
| TaitaTaveta | 1988   | Demographic and Health Survey (DHS) | CBH    |
| TaitaTaveta | 1993   | Demographic and Health Survey (DHS) | CBH    |
| TaitaTaveta | 2003   | Demographic and Health Survey (DHS) | CBH    |

**Appendix Table 10. Under-5 mortality reference sources by source date and location, 1950-2016**

| Location      | Source | Source years                             | Method |
|---------------|--------|------------------------------------------|--------|
| TaitaTaveta   | 2008   | Demographic and Health Survey (DHS)      | CBH    |
| TaitaTaveta   | 2014   | Demographic and Health Survey (DHS)      | CBH    |
| TanaRiver     | 2008   | Demographic and Health Survey (DHS)      | CBH    |
| TanaRiver     | 2014   | Demographic and Health Survey (DHS)      | CBH    |
| Eastern       | 1989   | Demographic and Health Survey (DHS)      | SBH    |
| Eastern       | 1993   | Demographic and Health Survey (DHS)      | SBH    |
| Eastern       | 1998   | Demographic and Health Survey (DHS)      | SBH    |
| Eastern       | 2003   | Demographic and Health Survey (DHS)      | SBH    |
| Eastern       | 2009   | Demographic and Health Survey (DHS)      | SBH    |
| Eastern       | 2014   | Demographic and Health Survey (DHS)      | SBH    |
| Embu          | 1988   | Demographic and Health Survey (DHS)      | CBH    |
| Embu          | 1993   | Demographic and Health Survey (DHS)      | CBH    |
| Embu          | 2008   | Demographic and Health Survey (DHS)      | CBH    |
| Embu          | 2014   | Demographic and Health Survey (DHS)      | CBH    |
| Isiolo        | 2011   | Multiple Indicator Cluster Survey (MICS) | SBH    |
| Kitui         | 1988   | Demographic and Health Survey (DHS)      | CBH    |
| Kitui         | 1993   | Demographic and Health Survey (DHS)      | CBH    |
| Kitui         | 1998   | Demographic and Health Survey (DHS)      | CBH    |
| Kitui         | 2003   | Demographic and Health Survey (DHS)      | CBH    |
| Kitui         | 2008   | Demographic and Health Survey (DHS)      | CBH    |
| Kitui         | 2014   | Demographic and Health Survey (DHS)      | CBH    |
| Machakos      | 1988   | Demographic and Health Survey (DHS)      | CBH    |
| Machakos      | 1993   | Demographic and Health Survey (DHS)      | CBH    |
| Machakos      | 1998   | Demographic and Health Survey (DHS)      | CBH    |
| Machakos      | 2003   | Demographic and Health Survey (DHS)      | CBH    |
| Machakos      | 2008   | Demographic and Health Survey (DHS)      | CBH    |
| Machakos      | 2014   | Demographic and Health Survey (DHS)      | CBH    |
| Makueni       | 2003   | Demographic and Health Survey (DHS)      | CBH    |
| Makueni       | 2008   | Demographic and Health Survey (DHS)      | CBH    |
| Makueni       | 2014   | Demographic and Health Survey (DHS)      | CBH    |
| Marsabit      | 2003   | Demographic and Health Survey (DHS)      | SBH    |
| Meru          | 1988   | Demographic and Health Survey (DHS)      | CBH    |
| Meru          | 1993   | Demographic and Health Survey (DHS)      | CBH    |
| Meru          | 1998   | Demographic and Health Survey (DHS)      | CBH    |
| Meru          | 2003   | Demographic and Health Survey (DHS)      | CBH    |
| Meru          | 2008   | Demographic and Health Survey (DHS)      | CBH    |
| Meru          | 2014   | Demographic and Health Survey (DHS)      | CBH    |
| TharakaNithi  | 2008   | Demographic and Health Survey (DHS)      | CBH    |
| TharakaNithi  | 2014   | Demographic and Health Survey (DHS)      | CBH    |
| Nairobi       | 1989   | Demographic and Health Survey (DHS)      | SBH    |
| Nairobi       | 1993   | Demographic and Health Survey (DHS)      | SBH    |
| Nairobi       | 1998   | Demographic and Health Survey (DHS)      | SBH    |
| Nairobi       | 2003   | Demographic and Health Survey (DHS)      | SBH    |
| Nairobi       | 2009   | Demographic and Health Survey (DHS)      | SBH    |
| Nairobi       | 1988   | Demographic and Health Survey (DHS)      | CBH    |
| Nairobi       | 1993   | Demographic and Health Survey (DHS)      | CBH    |
| Nairobi       | 1998   | Demographic and Health Survey (DHS)      | CBH    |
| Nairobi       | 2003   | Demographic and Health Survey (DHS)      | CBH    |
| Nairobi       | 2008   | Demographic and Health Survey (DHS)      | CBH    |
| Nairobi       | 2014   | Demographic and Health Survey (DHS)      | CBH    |
| North Eastern | 2003   | Demographic and Health Survey (DHS)      | SBH    |
| North Eastern | 2009   | Demographic and Health Survey (DHS)      | SBH    |
| North Eastern | 2014   | Demographic and Health Survey (DHS)      | SBH    |
| Garissa       | 2003   | Demographic and Health Survey (DHS)      | CBH    |
| Garissa       | 2008   | Demographic and Health Survey (DHS)      | CBH    |
| Garissa       | 2014   | Demographic and Health Survey (DHS)      | CBH    |
| Mandera       | 2007   | Multiple Indicator Cluster Survey (MICS) | SBH    |
| Wajir         | 2003   | Demographic and Health Survey (DHS)      | SBH    |
| Nyanza        | 1989   | Demographic and Health Survey (DHS)      | SBH    |
| Nyanza        | 1993   | Demographic and Health Survey (DHS)      | SBH    |
| Nyanza        | 1998   | Demographic and Health Survey (DHS)      | SBH    |
| Nyanza        | 2003   | Demographic and Health Survey (DHS)      | SBH    |
| Nyanza        | 2009   | Demographic and Health Survey (DHS)      | SBH    |
| Nyanza        | 2014   | Demographic and Health Survey (DHS)      | SBH    |
| HomaBay       | 2003   | Demographic and Health Survey (DHS)      | CBH    |
| HomaBay       | 2008   | Demographic and Health Survey (DHS)      | CBH    |
| HomaBay       | 2014   | Demographic and Health Survey (DHS)      | CBH    |

**Appendix Table 10. Under-5 mortality reference sources by source date and location, 1950-2016**

| Location        | Source | Source years                        | Method |
|-----------------|--------|-------------------------------------|--------|
| Kisii           | 1988   | Demographic and Health Survey (DHS) | CBH    |
| Kisii           | 1993   | Demographic and Health Survey (DHS) | CBH    |
| Kisii           | 1998   | Demographic and Health Survey (DHS) | CBH    |
| Kisii           | 2008   | Demographic and Health Survey (DHS) | CBH    |
| Kisii           | 2014   | Demographic and Health Survey (DHS) | CBH    |
| Kisumu          | 1988   | Demographic and Health Survey (DHS) | CBH    |
| Kisumu          | 1993   | Demographic and Health Survey (DHS) | CBH    |
| Kisumu          | 1998   | Demographic and Health Survey (DHS) | CBH    |
| Kisumu          | 2008   | Demographic and Health Survey (DHS) | CBH    |
| Kisumu          | 2014   | Demographic and Health Survey (DHS) | CBH    |
| Migori          | 2003   | Demographic and Health Survey (DHS) | CBH    |
| Migori          | 2008   | Demographic and Health Survey (DHS) | CBH    |
| Migori          | 2014   | Demographic and Health Survey (DHS) | CBH    |
| Nyamira         | 1998   | Demographic and Health Survey (DHS) | CBH    |
| Nyamira         | 2008   | Demographic and Health Survey (DHS) | CBH    |
| Nyamira         | 2014   | Demographic and Health Survey (DHS) | CBH    |
| Siaya           | 1988   | Demographic and Health Survey (DHS) | CBH    |
| Siaya           | 1993   | Demographic and Health Survey (DHS) | CBH    |
| Siaya           | 1998   | Demographic and Health Survey (DHS) | CBH    |
| Siaya           | 2003   | Demographic and Health Survey (DHS) | CBH    |
| Siaya           | 2008   | Demographic and Health Survey (DHS) | CBH    |
| Siaya           | 2014   | Demographic and Health Survey (DHS) | CBH    |
| Rift Valley     | 1989   | Demographic and Health Survey (DHS) | SBH    |
| Rift Valley     | 1993   | Demographic and Health Survey (DHS) | SBH    |
| Rift Valley     | 1998   | Demographic and Health Survey (DHS) | SBH    |
| Rift Valley     | 2003   | Demographic and Health Survey (DHS) | SBH    |
| Rift Valley     | 2009   | Demographic and Health Survey (DHS) | SBH    |
| Rift Valley     | 2014   | Demographic and Health Survey (DHS) | SBH    |
| Baringo         | 2009   | Demographic and Health Survey (DHS) | SBH    |
| Bomet           | 2008   | Demographic and Health Survey (DHS) | CBH    |
| Bomet           | 2014   | Demographic and Health Survey (DHS) | CBH    |
| Elgeyo-Marakwet | 1993   | Demographic and Health Survey (DHS) | CBH    |
| Elgeyo-Marakwet | 1998   | Demographic and Health Survey (DHS) | CBH    |
| Elgeyo-Marakwet | 2003   | Demographic and Health Survey (DHS) | CBH    |
| Elgeyo-Marakwet | 2008   | Demographic and Health Survey (DHS) | CBH    |
| Elgeyo-Marakwet | 2014   | Demographic and Health Survey (DHS) | CBH    |
| Kajiado         | 1988   | Demographic and Health Survey (DHS) | CBH    |
| Kajiado         | 1998   | Demographic and Health Survey (DHS) | CBH    |
| Kajiado         | 2008   | Demographic and Health Survey (DHS) | CBH    |
| Kajiado         | 2014   | Demographic and Health Survey (DHS) | CBH    |
| Kericho         | 1988   | Demographic and Health Survey (DHS) | CBH    |
| Kericho         | 1993   | Demographic and Health Survey (DHS) | CBH    |
| Kericho         | 1998   | Demographic and Health Survey (DHS) | CBH    |
| Kericho         | 2008   | Demographic and Health Survey (DHS) | CBH    |
| Kericho         | 2014   | Demographic and Health Survey (DHS) | CBH    |
| Laikipia        | 1988   | Demographic and Health Survey (DHS) | CBH    |
| Laikipia        | 2003   | Demographic and Health Survey (DHS) | CBH    |
| Laikipia        | 2008   | Demographic and Health Survey (DHS) | CBH    |
| Laikipia        | 2014   | Demographic and Health Survey (DHS) | CBH    |
| Nakuru          | 1988   | Demographic and Health Survey (DHS) | CBH    |
| Nakuru          | 1993   | Demographic and Health Survey (DHS) | CBH    |
| Nakuru          | 1998   | Demographic and Health Survey (DHS) | CBH    |
| Nakuru          | 2003   | Demographic and Health Survey (DHS) | CBH    |
| Nakuru          | 2008   | Demographic and Health Survey (DHS) | CBH    |
| Nakuru          | 2014   | Demographic and Health Survey (DHS) | CBH    |
| Nandi           | 1988   | Demographic and Health Survey (DHS) | CBH    |
| Nandi           | 1993   | Demographic and Health Survey (DHS) | CBH    |
| Nandi           | 1998   | Demographic and Health Survey (DHS) | CBH    |
| Nandi           | 2014   | Demographic and Health Survey (DHS) | CBH    |
| Narok           | 1988   | Demographic and Health Survey (DHS) | CBH    |
| Narok           | 1993   | Demographic and Health Survey (DHS) | CBH    |
| Narok           | 1998   | Demographic and Health Survey (DHS) | CBH    |
| Narok           | 2003   | Demographic and Health Survey (DHS) | CBH    |
| Narok           | 2008   | Demographic and Health Survey (DHS) | CBH    |
| Narok           | 2014   | Demographic and Health Survey (DHS) | CBH    |
| Samburu         | 2009   | Demographic and Health Survey (DHS) | SBH    |
| TransNzoia      | 1988   | Demographic and Health Survey (DHS) | CBH    |

**Appendix Table 10. Under-5 mortality reference sources by source date and location, 1950-2016**

| Location    | Source | Source years                             | Method |
|-------------|--------|------------------------------------------|--------|
| TransNzoia  | 1993   | Demographic and Health Survey (DHS)      | CBH    |
| TransNzoia  | 1998   | Demographic and Health Survey (DHS)      | CBH    |
| TransNzoia  | 2003   | Demographic and Health Survey (DHS)      | CBH    |
| TransNzoia  | 2014   | Demographic and Health Survey (DHS)      | CBH    |
| Turkana     | 2003   | Demographic and Health Survey (DHS)      | CBH    |
| Turkana     | 2008   | Demographic and Health Survey (DHS)      | CBH    |
| Turkana     | 2014   | Demographic and Health Survey (DHS)      | CBH    |
| UasinGishu  | 1988   | Demographic and Health Survey (DHS)      | CBH    |
| UasinGishu  | 1993   | Demographic and Health Survey (DHS)      | CBH    |
| UasinGishu  | 1998   | Demographic and Health Survey (DHS)      | CBH    |
| UasinGishu  | 2003   | Demographic and Health Survey (DHS)      | CBH    |
| UasinGishu  | 2014   | Demographic and Health Survey (DHS)      | CBH    |
| WestPokot   | 2009   | Demographic and Health Survey (DHS)      | SBH    |
| Western     | 1989   | Demographic and Health Survey (DHS)      | SBH    |
| Western     | 1993   | Demographic and Health Survey (DHS)      | SBH    |
| Western     | 1998   | Demographic and Health Survey (DHS)      | SBH    |
| Western     | 2003   | Demographic and Health Survey (DHS)      | SBH    |
| Western     | 2009   | Demographic and Health Survey (DHS)      | SBH    |
| Western     | 2014   | Demographic and Health Survey (DHS)      | SBH    |
| Bungoma     | 1988   | Demographic and Health Survey (DHS)      | CBH    |
| Bungoma     | 1993   | Demographic and Health Survey (DHS)      | CBH    |
| Bungoma     | 1998   | Demographic and Health Survey (DHS)      | CBH    |
| Bungoma     | 2003   | Demographic and Health Survey (DHS)      | CBH    |
| Bungoma     | 2014   | Demographic and Health Survey (DHS)      | CBH    |
| Busia       | 1988   | Demographic and Health Survey (DHS)      | CBH    |
| Busia       | 1993   | Demographic and Health Survey (DHS)      | CBH    |
| Busia       | 1998   | Demographic and Health Survey (DHS)      | CBH    |
| Busia       | 2003   | Demographic and Health Survey (DHS)      | CBH    |
| Busia       | 2008   | Demographic and Health Survey (DHS)      | CBH    |
| Busia       | 2014   | Demographic and Health Survey (DHS)      | CBH    |
| Kakamega    | 1988   | Demographic and Health Survey (DHS)      | CBH    |
| Kakamega    | 1993   | Demographic and Health Survey (DHS)      | CBH    |
| Kakamega    | 1998   | Demographic and Health Survey (DHS)      | CBH    |
| Kakamega    | 2003   | Demographic and Health Survey (DHS)      | CBH    |
| Kakamega    | 2008   | Demographic and Health Survey (DHS)      | CBH    |
| Kakamega    | 2014   | Demographic and Health Survey (DHS)      | CBH    |
| Vihiga      | 2008   | Demographic and Health Survey (DHS)      | CBH    |
| Vihiga      | 2014   | Demographic and Health Survey (DHS)      | CBH    |
| Madagascar  | 1992   | Demographic and Health Survey (DHS)      | CBH    |
| Madagascar  | 1997   | Demographic and Health Survey (DHS)      | CBH    |
| Madagascar  | 2003   | Demographic and Health Survey (DHS)      | CBH    |
| Malawi      | 1992   | Demographic and Health Survey (DHS)      | CBH    |
| Malawi      | 2000   | Demographic and Health Survey (DHS)      | CBH    |
| Malawi      | 2004   | Demographic and Health Survey (DHS)      | CBH    |
| Malawi      | 2010   | Demographic and Health Survey (DHS)      | CBH    |
| Mozambique  | 1997   | Demographic and Health Survey (DHS)      | CBH    |
| Mozambique  | 2003   | Demographic and Health Survey (DHS)      | CBH    |
| Mozambique  | 2011   | Demographic and Health Survey (DHS)      | CBH    |
| Rwanda      | 1992   | Demographic and Health Survey (DHS)      | CBH    |
| Rwanda      | 2000   | Demographic and Health Survey (DHS)      | CBH    |
| Rwanda      | 2005   | Demographic and Health Survey (DHS)      | CBH    |
| Rwanda      | 2007   | Demographic and Health Survey (DHS)      | CBH    |
| Rwanda      | 2010   | Demographic and Health Survey (DHS)      | CBH    |
| Rwanda      | 2014   | Demographic and Health Survey (DHS)      | CBH    |
| Somalia     | 1999   | Multiple Indicator Cluster Survey (MICS) | SBH    |
| Somalia     | 2006   | Multiple Indicator Cluster Survey (MICS) | CBH    |
| Somalia     | 2006   | Multiple Indicator Cluster Survey (MICS) | SBH    |
| South Sudan | 2008   | Census (IPUMS)                           | SBH    |
| Tanzania    | 1991   | Demographic and Health Survey (DHS)      | CBH    |
| Tanzania    | 1996   | Demographic and Health Survey (DHS)      | CBH    |
| Tanzania    | 1999   | Demographic and Health Survey (DHS)      | CBH    |
| Tanzania    | 2004   | Demographic and Health Survey (DHS)      | CBH    |
| Tanzania    | 2009   | Demographic and Health Survey (DHS)      | CBH    |
| Tanzania    | 2015   | Demographic and Health Survey (DHS)      | CBH    |
| Uganda      | 1988   | Demographic and Health Survey (DHS)      | CBH    |
| Uganda      | 1995   | Demographic and Health Survey (DHS)      | CBH    |
| Uganda      | 2000   | Demographic and Health Survey (DHS)      | CBH    |

**Appendix Table 10. Under-5 mortality reference sources by source date and location, 1950-2016**

| Location      | Source    | Source years                             | Method     |
|---------------|-----------|------------------------------------------|------------|
| Uganda        | 2006      | Demographic and Health Survey (DHS)      | CBH        |
| Uganda        | 2011      | Demographic and Health Survey (DHS)      | CBH        |
| Zambia        | 1992      | Demographic and Health Survey (DHS)      | CBH        |
| Zambia        | 1996      | Demographic and Health Survey (DHS)      | CBH        |
| Zambia        | 2001      | Demographic and Health Survey (DHS)      | CBH        |
| Zambia        | 2007      | Demographic and Health Survey (DHS)      | CBH        |
| Zambia        | 2013      | Demographic and Health Survey (DHS)      | CBH        |
| Botswana      | 1988      | Demographic and Health Survey (DHS)      | CBH        |
| Lesotho       | 1986      | Census                                   | SBH        |
| Lesotho       | 2001      | Demographic Survey                       | SBH        |
| Lesotho       | 2011      | Demographic Survey                       | SBH        |
| Lesotho       | 2004      | Demographic and Health Survey (DHS)      | CBH        |
| Lesotho       | 2004      | Demographic and Health Survey (DHS)      | SBH        |
| Lesotho       | 2009      | Demographic and Health Survey (DHS)      | SBH        |
| Lesotho       | 2009      | Demographic and Health Survey (DHS)      | CBH        |
| Lesotho       | 2014      | Demographic and Health Survey (DHS)      | CBH        |
| Lesotho       | 2000      | Multiple Indicator Cluster Survey (MICS) | SBH        |
| Namibia       | 1992      | Demographic and Health Survey (DHS)      | CBH        |
| Namibia       | 2000      | Demographic and Health Survey (DHS)      | CBH        |
| Namibia       | 2006      | Demographic and Health Survey (DHS)      | CBH        |
| Namibia       | 2013      | Demographic and Health Survey (DHS)      | CBH        |
| South Africa  | 1998      | Demographic and Health Survey (DHS)      | CBH        |
| South Africa  | 2006      | Survey (IPUMS)                           | HH         |
| South Africa  | 2012      | Vital Registration                       | VR/SRS/DSP |
| Eastern Cape  | 1996      | Census (IPUMS)                           | SBH        |
| Free State    | 2000      | Census                                   | HH         |
| Free State    | 2006      | Census                                   | HH         |
| Free State    | 2011      | Census                                   | HH         |
| Free State    | 1996      | Census (IPUMS)                           | SBH        |
| Gauteng       | 2000      | Census                                   | HH         |
| Gauteng       | 2006      | Census                                   | HH         |
| Gauteng       | 2011      | Census                                   | HH         |
| Gauteng       | 1996      | Census (IPUMS)                           | SBH        |
| KwaZulu-Natal | 1996      | Census (IPUMS)                           | SBH        |
| Limpopo       | 1996      | Census (IPUMS)                           | SBH        |
| Mpumalanga    | 1996      | Census (IPUMS)                           | SBH        |
| North-West    | 2000      | Census                                   | HH         |
| North-West    | 2006      | Census                                   | HH         |
| North-West    | 2011      | Census                                   | HH         |
| North-West    | 1996      | Census (IPUMS)                           | SBH        |
| Northern Cape | 1996      | Census (IPUMS)                           | SBH        |
| Western Cape  | 1996      | Census (IPUMS)                           | SBH        |
| Swaziland     | 2006      | Demographic and Health Survey (DHS)      | SBH        |
| Swaziland     | 2006      | Demographic and Health Survey (DHS)      | CBH        |
| Swaziland     | 2000      | Multiple Indicator Cluster Survey (MICS) | SBH        |
| Swaziland     | 2010      | Multiple Indicator Cluster Survey (MICS) | SBH        |
| Swaziland     | 2010      | Multiple Indicator Cluster Survey (MICS) | CBH        |
| Swaziland     | 2014      | Multiple Indicator Cluster Survey (MICS) | SBH        |
| Swaziland     | 2014      | Multiple Indicator Cluster Survey (MICS) | CBH        |
| Zimbabwe      | 1988      | Demographic and Health Survey (DHS)      | CBH        |
| Zimbabwe      | 1994      | Demographic and Health Survey (DHS)      | CBH        |
| Zimbabwe      | 1999      | Demographic and Health Survey (DHS)      | CBH        |
| Zimbabwe      | 2005      | Demographic and Health Survey (DHS)      | CBH        |
| Zimbabwe      | 2010      | Demographic and Health Survey (DHS)      | CBH        |
| Zimbabwe      | 2015      | Demographic and Health Survey (DHS)      | CBH        |
| Benin         | 1996      | Demographic and Health Survey (DHS)      | CBH        |
| Benin         | 2001      | Demographic and Health Survey (DHS)      | CBH        |
| Benin         | 2006      | Demographic and Health Survey (DHS)      | CBH        |
| Burkina Faso  | 1992      | Demographic and Health Survey (DHS)      | CBH        |
| Burkina Faso  | 1998      | Demographic and Health Survey (DHS)      | CBH        |
| Burkina Faso  | 2003      | Demographic and Health Survey (DHS)      | CBH        |
| Burkina Faso  | 2010      | Demographic and Health Survey (DHS)      | CBH        |
| Cameroon      | 1991      | Demographic and Health Survey (DHS)      | CBH        |
| Cameroon      | 1998      | Demographic and Health Survey (DHS)      | CBH        |
| Cameroon      | 2004      | Demographic and Health Survey (DHS)      | CBH        |
| Cameroon      | 2011      | Demographic and Health Survey (DHS)      | CBH        |
| Cape Verde    | 1955-2012 | Vital Registration                       | VR/SRS/DSP |

**Appendix Table 10. Under-5 mortality reference sources by source date and location, 1950-2016**

| Location              | Source    | Source years                             | Method     |
|-----------------------|-----------|------------------------------------------|------------|
| Chad                  | 1996      | Demographic and Health Survey (DHS)      | CBH        |
| Chad                  | 2004      | Demographic and Health Survey (DHS)      | CBH        |
| Chad                  | 2014      | Demographic and Health Survey (DHS)      | CBH        |
| Cote d'Ivoire         | 1994      | Demographic and Health Survey (DHS)      | CBH        |
| Cote d'Ivoire         | 1998      | Demographic and Health Survey (DHS)      | CBH        |
| Cote d'Ivoire         | 2011      | Demographic and Health Survey (DHS)      | CBH        |
| The Gambia            | 2013      | Demographic and Health Survey (DHS)      | CBH        |
| Ghana                 | 1988      | Demographic and Health Survey (DHS)      | CBH        |
| Ghana                 | 1993      | Demographic and Health Survey (DHS)      | CBH        |
| Ghana                 | 1998      | Demographic and Health Survey (DHS)      | CBH        |
| Ghana                 | 2003      | Demographic and Health Survey (DHS)      | CBH        |
| Ghana                 | 2008      | Demographic and Health Survey (DHS)      | CBH        |
| Ghana                 | 2014      | Demographic and Health Survey (DHS)      | CBH        |
| Ghana                 | 2007      | Special Demographic and Health Survey    | CBH        |
| Guinea                | 1992      | Demographic and Health Survey (DHS)      | CBH        |
| Guinea                | 1999      | Demographic and Health Survey (DHS)      | CBH        |
| Guinea                | 2005      | Demographic and Health Survey (DHS)      | CBH        |
| Guinea                | 2012      | Demographic and Health Survey (DHS)      | CBH        |
| Guinea-Bissau         | 2000      | Multiple Indicator Cluster Survey (MICS) | SBH        |
| Guinea-Bissau         | 2006      | Multiple Indicator Cluster Survey (MICS) | SBH        |
| Guinea-Bissau         | 2010      | Multiple Indicator Cluster Survey (MICS) | SBH        |
| Guinea-Bissau         | 2014      | Multiple Indicator Cluster Survey (MICS) | CBH        |
| Guinea-Bissau         | 2014      | Multiple Indicator Cluster Survey (MICS) | SBH        |
| Liberia               | 1986      | Demographic and Health Survey (DHS)      | CBH        |
| Liberia               | 2006      | Demographic and Health Survey (DHS)      | CBH        |
| Liberia               | 2013      | Demographic and Health Survey (DHS)      | CBH        |
| Mali                  | 1987      | Demographic and Health Survey (DHS)      | CBH        |
| Mali                  | 1995      | Demographic and Health Survey (DHS)      | CBH        |
| Mali                  | 2001      | Demographic and Health Survey (DHS)      | CBH        |
| Mali                  | 2006      | Demographic and Health Survey (DHS)      | CBH        |
| Mali                  | 2012      | Demographic and Health Survey (DHS)      | CBH        |
| Mauritania            | 2000      | Demographic and Health Survey (DHS)      | CBH        |
| Niger                 | 1992      | Demographic and Health Survey (DHS)      | CBH        |
| Niger                 | 1998      | Demographic and Health Survey (DHS)      | CBH        |
| Niger                 | 2006      | Demographic and Health Survey (DHS)      | CBH        |
| Niger                 | 2012      | Demographic and Health Survey (DHS)      | CBH        |
| Nigeria               | 1990      | Demographic and Health Survey (DHS)      | CBH        |
| Nigeria               | 2003      | Demographic and Health Survey (DHS)      | CBH        |
| Nigeria               | 2008      | Demographic and Health Survey (DHS)      | CBH        |
| Nigeria               | 2013      | Demographic and Health Survey (DHS)      | CBH        |
| Sao Tome and Principe | 1991      | Census                                   | SBH        |
| Sao Tome and Principe | 2008      | Demographic and Health Survey (DHS)      | CBH        |
| Sao Tome and Principe | 2008      | Demographic and Health Survey (DHS)      | SBH        |
| Sao Tome and Principe | 2000      | Multiple Indicator Cluster Survey (MICS) | SBH        |
| Sao Tome and Principe | 2006      | Multiple Indicator Cluster Survey (MICS) | SBH        |
| Sao Tome and Principe | 2014      | Multiple Indicator Cluster Survey (MICS) | SBH        |
| Sao Tome and Principe | 2014      | Multiple Indicator Cluster Survey (MICS) | CBH        |
| Sao Tome and Principe | 1955-1987 | Vital Registration                       | VR/SRS/DSP |
| Senegal               | 1986      | Demographic and Health Survey (DHS)      | CBH        |
| Senegal               | 1992      | Demographic and Health Survey (DHS)      | CBH        |
| Senegal               | 1997      | Demographic and Health Survey (DHS)      | CBH        |
| Senegal               | 2005      | Demographic and Health Survey (DHS)      | CBH        |
| Senegal               | 2010      | Demographic and Health Survey (DHS)      | CBH        |
| Senegal               | 2012      | Demographic and Health Survey (DHS)      | CBH        |
| Senegal               | 2014      | Demographic and Health Survey (DHS)      | CBH        |
| Senegal               | 2015      | Demographic and Health Survey (DHS)      | CBH        |
| Sierra Leone          | 2008      | Demographic and Health Survey (DHS)      | CBH        |
| Sierra Leone          | 2013      | Demographic and Health Survey (DHS)      | CBH        |
| Togo                  | 1988      | Demographic and Health Survey (DHS)      | CBH        |
| Togo                  | 1998      | Demographic and Health Survey (DHS)      | CBH        |
| Togo                  | 2013      | Demographic and Health Survey (DHS)      | CBH        |

Appendix Table 11A. Under-5 mortality rates by location, both sexes combined, 1970, 1975, 1980, 1985, 1990, 1995, 2000, 2005, 2010, 2016

| Location                  | 1970                         | 1975                         | 1980                         | 1985                         | 1990                         | 1995                         | 2000                         | 2005                         | 2010                       | 2016                      |
|---------------------------|------------------------------|------------------------------|------------------------------|------------------------------|------------------------------|------------------------------|------------------------------|------------------------------|----------------------------|---------------------------|
| Global                    | 144.60<br>(137.92 to 151.66) | 127.15<br>(122.28 to 132.23) | 111.19<br>(107.16 to 115.19) | 97.34<br>(93.96 to 100.55)   | 85.08<br>(82.15 to 87.96)    | 77.56<br>(74.99 to 80.11)    | 69.39<br>(67.16 to 71.80)    | 59.84<br>(57.31 to 62.43)    | 49.82<br>(46.43 to 53.51)  | 38.42<br>(34.48 to 43.05) |
| High SDI                  | 88.08<br>(82.31 to 94.51)    | 69.40<br>(65.89 to 73.12)    | 56.63<br>(53.23 to 60.04)    | 45.18<br>(42.80 to 47.69)    | 37.49<br>(35.57 to 39.71)    | 31.39<br>(29.67 to 33.16)    | 24.73<br>(23.11 to 26.44)    | 18.85<br>(17.41 to 20.47)    | 14.46<br>(13.06 to 16.00)  | 11.33<br>(9.80 to 13.16)  |
| High-middle SDI           | 26.16<br>(25.58 to 26.83)    | 20.55<br>(20.00 to 21.17)    | 15.61<br>(15.17 to 16.15)    | 12.30<br>(12.03 to 12.61)    | 10.26<br>(10.08 to 10.50)    | 8.21<br>(8.07 to 8.38)       | 6.89<br>(6.84 to 6.95)       | 5.42<br>(6.18 to 6.28)       | 4.93<br>(5.37 to 5.47)     | 4.93<br>(4.58 to 5.33)    |
| Middle SDI                | 207.59<br>(197.60 to 218.10) | 182.67<br>(174.52 to 191.11) | 159.20<br>(152.84 to 165.09) | 139.23<br>(134.26 to 144.14) | 120.16<br>(115.86 to 124.43) | 107.35<br>(103.45 to 111.13) | 94.08<br>(90.82 to 97.41)    | 80.47<br>(77.13 to 84.01)    | 66.20<br>(61.66 to 70.94)  | 49.56<br>(44.81 to 55.19) |
| Low-middle SDI            | 238.21<br>(220.73 to 256.90) | 223.15<br>(212.32 to 233.78) | 205.89<br>(198.49 to 213.76) | 190.14<br>(183.90 to 196.71) | 173.50<br>(167.83 to 179.42) | 159.64<br>(154.34 to 165.05) | 140.71<br>(135.75 to 145.70) | 116.92<br>(111.67 to 122.35) | 96.16<br>(88.94 to 104.10) | 70.18<br>(60.87 to 80.70) |
| Low SDI                   | 135.90<br>(127.88 to 144.27) | 111.88<br>(106.01 to 117.74) | 91.34<br>(86.64 to 96.34)    | 74.26<br>(70.49 to 78.14)    | 60.05<br>(56.90 to 63.46)    | 49.21<br>(46.90 to 51.54)    | 40.22<br>(38.34 to 42.22)    | 32.56<br>(30.73 to 34.29)    | 25.45<br>(23.49 to 27.59)  | 19.25<br>(16.69 to 22.17) |
| High-income               | 29.66<br>(29.10 to 30.30)    | 23.64<br>(23.08 to 24.25)    | 17.08<br>(16.65 to 17.62)    | 13.22<br>(12.96 to 13.53)    | 11.23<br>(11.06 to 11.47)    | 8.94<br>(8.81 to 9.10)       | 7.56<br>(7.52 to 7.61)       | 6.77<br>(6.73 to 6.83)       | 5.94<br>(5.89 to 5.99)     | 5.40<br>(5.08 to 5.77)    |
| High-income North America | 23.92<br>(23.76 to 24.07)    | 19.04<br>(18.90 to 19.16)    | 15.05<br>(14.94 to 15.17)    | 12.51<br>(12.40 to 12.61)    | 10.90<br>(10.81 to 10.99)    | 8.97<br>(8.89 to 9.05)       | 8.05<br>(7.98 to 8.13)       | 7.88<br>(7.81 to 7.96)       | 7.07<br>(7.00 to 7.13)     | 6.69<br>(6.46 to 6.95)    |
| Canada                    | 22.86<br>(22.43 to 23.25)    | 17.29<br>(16.97 to 17.62)    | 12.54<br>(12.27 to 12.82)    | 9.68<br>(9.46 to 9.89)       | 8.29<br>(8.09 to 8.51)       | 7.27<br>(7.08 to 7.46)       | 6.18<br>(6.00 to 6.35)       | 6.09<br>(5.91 to 6.27)       | 5.72<br>(5.56 to 5.88)     | 5.37<br>(5.18 to 5.56)    |
| Greenland                 | 46.81<br>(43.14 to 50.05)    | 39.46<br>(36.31 to 42.82)    | 39.08<br>(35.83 to 42.68)    | 38.04<br>(34.51 to 41.91)    | 38.73<br>(34.94 to 42.99)    | 27.04<br>(24.25 to 30.14)    | 19.41<br>(17.20 to 21.99)    | 18.06<br>(15.89 to 20.71)    | 16.32<br>(14.16 to 18.72)  | 14.14<br>(11.85 to 16.88) |
| United States             | 24.08<br>(23.78 to 24.40)    | 19.24<br>(18.99 to 19.50)    | 15.30<br>(15.10 to 15.52)    | 12.76<br>(12.57 to 12.96)    | 11.10<br>(10.94 to 11.27)    | 9.09<br>(8.97 to 9.23)       | 8.20<br>(8.11 to 8.30)       | 8.05<br>(7.93 to 8.17)       | 7.21<br>(7.09 to 7.33)     | 6.85<br>(6.66 to 7.04)    |
| Australasia               | 21.50<br>(21.15 to 21.84)    | 17.88<br>(17.57 to 18.20)    | 13.58<br>(13.30 to 13.86)    | 11.96<br>(11.70 to 12.23)    | 9.67<br>(9.43 to 9.90)       | 7.35<br>(7.17 to 7.53)       | 6.59<br>(6.42 to 6.75)       | 6.00<br>(5.83 to 6.17)       | 5.16<br>(5.01 to 5.31)     | 4.16<br>(3.84 to 4.52)    |
| Australia                 | 21.63<br>(21.20 to 22.05)    | 17.63<br>(17.27 to 18.02)    | 13.11<br>(12.78 to 13.42)    | 11.59<br>(11.30 to 11.88)    | 9.40<br>(9.12 to 9.66)       | 7.05<br>(6.85 to 7.26)       | 6.37<br>(6.18 to 6.56)       | 5.85<br>(5.68 to 6.03)       | 4.90<br>(4.75 to 5.08)     | 3.89<br>(3.59 to 4.24)    |
| New Zealand               | 20.93<br>(20.38 to 21.50)    | 18.92<br>(18.38 to 19.41)    | 15.68<br>(15.19 to 16.16)    | 13.69<br>(13.29 to 14.13)    | 10.89<br>(10.53 to 11.26)    | 8.66<br>(8.37 to 8.97)       | 7.54<br>(7.26 to 7.84)       | 6.65<br>(6.38 to 6.95)       | 6.35<br>(6.10 to 6.59)     | 5.57<br>(5.18 to 6.00)    |
| High-income Asia Pacific  | 30.77<br>(28.25 to 33.74)    | 21.82<br>(19.42 to 24.42)    | 15.29<br>(13.22 to 17.81)    | 10.63<br>(9.27 to 12.23)     | 8.30<br>(7.31 to 9.72)       | 6.77<br>(6.10 to 7.55)       | 5.34<br>(5.26 to 5.43)       | 4.29<br>(4.21 to 4.36)       | 3.45<br>(3.38 to 3.53)     | 2.92<br>(2.64 to 3.23)    |
| Brunei                    | 69.59<br>(66.95 to 72.45)    | 43.49<br>(41.43 to 45.66)    | 23.82<br>(22.44 to 25.32)    | 15.26<br>(14.31 to 16.25)    | 11.56<br>(10.81 to 12.43)    | 9.73<br>(9.06 to 10.52)      | 8.83<br>(8.23 to 9.48)       | 8.75<br>(8.17 to 9.37)       | 8.64<br>(7.98 to 9.34)     | 8.64<br>(8.04 to 10.49)   |
| Japan                     | 17.37<br>(17.18 to 17.57)    | 13.68<br>(13.51 to 13.85)    | 10.10<br>(9.97 to 10.25)     | 7.44<br>(7.31 to 7.58)       | 5.93<br>(6.23 to 6.47)       | 4.52<br>(5.76 to 6.11)       | 3.77<br>(4.43 to 4.62)       | 3.77<br>(3.69 to 3.85)       | 3.16<br>(3.08 to 3.25)     | 2.64<br>(2.41 to 2.89)    |
| Singapore                 | 27.58<br>(26.77 to 28.41)    | 18.95<br>(18.27 to 19.65)    | 14.94<br>(14.39 to 15.51)    | 10.71<br>(10.25 to 11.22)    | 7.54<br>(7.19 to 7.86)       | 5.11<br>(4.85 to 5.39)       | 3.84<br>(3.62 to 4.08)       | 3.03<br>(2.84 to 3.26)       | 2.71<br>(2.53 to 2.91)     | 2.27<br>(2.04 to 2.53)    |
| South Korea               | 57.67<br>(50.20 to 66.34)    | 39.54<br>(32.07 to 47.63)    | 25.13<br>(19.13 to 32.48)    | 17.64<br>(13.17 to 22.74)    | 11.99<br>(9.02 to 16.23)     | 8.27<br>(6.51 to 10.38)      | 7.05<br>(6.87 to 7.24)       | 5.58<br>(5.40 to 5.75)       | 4.25<br>(3.97 to 4.25)     | 3.52<br>(2.78 to 4.39)    |
| Western Europe            | 26.32<br>(26.14 to 26.53)    | 20.77<br>(20.59 to 20.94)    | 14.90<br>(14.80 to 15.02)    | 11.31<br>(11.19 to 11.42)    | 9.32<br>(9.23 to 9.41)       | 6.91<br>(6.82 to 6.99)       | 5.73<br>(5.66 to 5.80)       | 4.83<br>(4.77 to 4.89)       | 4.26<br>(4.20 to 4.32)     | 3.70<br>(3.26 to 4.19)    |
| Andorra                   | 22.33<br>(17.39 to 28.62)    | 13.11<br>(10.18 to 16.67)    | 7.61<br>(5.91 to 9.79)       | 6.79<br>(5.30 to 8.54)       | 6.09<br>(4.80 to 7.71)       | 4.34<br>(3.44 to 5.40)       | 3.17<br>(2.50 to 3.97)       | 3.11<br>(2.64 to 4.17)       | 3.17<br>(2.52 to 3.97)     | 3.11<br>(2.60 to 4.27)    |
| Austria                   | 29.67<br>(28.80 to 30.49)    | 24.09<br>(23.29 to 24.85)    | 16.90<br>(16.27 to 17.58)    | 13.26<br>(12.68 to 13.80)    | 9.68<br>(9.24 to 10.16)      | 7.99<br>(6.45 to 7.17)       | 6.79<br>(5.39 to 6.06)       | 5.72<br>(4.63 to 5.24)       | 4.92<br>(4.27 to 4.83)     | 3.37<br>(2.81 to 4.05)    |
| Belgium                   | 24.63<br>(24.27 to 25.02)    | 19.31<br>(18.97 to 19.65)    | 14.82<br>(14.55 to 15.12)    | 11.77<br>(11.52 to 12.04)    | 9.99<br>(9.76 to 10.21)      | 7.63<br>(7.42 to 7.82)       | 5.85<br>(5.67 to 6.02)       | 4.94<br>(4.79 to 5.10)       | 4.49<br>(4.35 to 4.66)     | 3.95<br>(3.61 to 4.33)    |
| Cyprus                    | 40.31<br>(36.31 to 44.32)    | 30.90<br>(29.49 to 32.28)    | 20.47<br>(19.65 to 21.33)    | 15.25<br>(14.61 to 16.02)    | 12.85<br>(12.26 to 13.48)    | 10.46<br>(9.90 to 11.03)     | 8.11<br>(7.60 to 8.64)       | 6.16<br>(5.70 to 6.63)       | 4.35<br>(3.95 to 4.77)     | 3.28<br>(2.82 to 3.80)    |
| Denmark                   | 17.12<br>(16.49 to 17.77)    | 12.62<br>(12.11 to 13.15)    | 10.31<br>(9.85 to 10.79)     | 9.58<br>(9.08 to 10.10)      | 9.02<br>(8.60 to 9.51)       | 6.67<br>(6.33 to 7.03)       | 5.60<br>(5.30 to 5.93)       | 4.88<br>(4.60 to 5.17)       | 4.11<br>(3.85 to 4.38)     | 4.07<br>(3.50 to 4.74)    |
| Finland                   | 16.47<br>(15.68 to 17.34)    | 12.72<br>(12.00 to 13.50)    | 8.88<br>(8.34 to 9.48)       | 7.34<br>(6.85 to 7.83)       | 6.82<br>(6.32 to 7.34)       | 5.00<br>(4.62 to 5.39)       | 4.24<br>(3.89 to 4.63)       | 3.95<br>(3.60 to 4.32)       | 3.01<br>(2.73 to 3.32)     | 2.19<br>(1.77 to 2.70)    |
| France                    | 18.40<br>(18.12 to 18.68)    | 16.51<br>(16.25 to 16.76)    | 12.48<br>(12.26 to 12.74)    | 10.02<br>(9.81 to 10.22)     | 8.87<br>(8.67 to 9.07)       | 6.11<br>(5.94 to 6.28)       | 5.39<br>(5.24 to 5.56)       | 4.39<br>(4.26 to 4.53)       | 4.19<br>(4.06 to 4.31)     | 3.82<br>(3.18 to 4.59)    |
| Germany                   | 25.86<br>(25.58 to 26.14)    | 21.72<br>(21.42 to 22.01)    | 15.27<br>(15.03 to 15.54)    | 11.04<br>(10.84 to 11.27)    | 9.11<br>(8.91 to 9.31)       | 6.52<br>(6.36 to 6.70)       | 5.38<br>(5.23 to 5.54)       | 4.75<br>(4.61 to 4.90)       | 4.22<br>(4.08 to 4.36)     | 3.61<br>(3.00 to 4.44)    |
| Greece                    | 34.05<br>(33.38 to 34.74)    | 26.83<br>(26.24 to 27.40)    | 20.29<br>(19.80 to 20.78)    | 15.44<br>(15.01 to 15.86)    | 10.69<br>(10.35 to 11.05)    | 8.61<br>(8.33 to 8.91)       | 6.34<br>(6.10 to 6.58)       | 5.55<br>(4.36 to 6.74)       | 4.55<br>(3.87 to 4.22)     | 3.91<br>(3.56 to 4.31)    |
| Iceland                   | 15.99<br>(14.77 to 17.28)    | 13.33<br>(12.30 to 14.54)    | 9.72<br>(8.85 to 10.66)      | 7.88<br>(7.12 to 8.71)       | 6.53<br>(5.92 to 7.26)       | 5.85<br>(5.20 to 6.58)       | 5.05<br>(3.55 to 6.57)       | 4.01<br>(2.79 to 5.62)       | 3.17<br>(2.26 to 4.00)     | 2.20<br>(1.85 to 2.62)    |
| Ireland                   | 22.64<br>(21.84 to 23.47)    | 20.34<br>(19.60 to 21.11)    | 14.17<br>(13.58 to 14.75)    | 10.73<br>(10.25 to 11.23)    | 9.34<br>(8.88 to 9.81)       | 7.38<br>(6.96 to 7.80)       | 6.58<br>(6.85 to 7.68)       | 5.98<br>(4.68 to 7.59)       | 4.98<br>(3.94 to 6.44)     | 3.91<br>(3.37 to 4.51)    |
| Israel                    | 30.47<br>(28.10 to 33.15)    | 29.16<br>(28.27 to 30.10)    | 17.18<br>(16.53 to 17.84)    | 13.76<br>(13.20 to 14.33)    | 11.86<br>(11.40 to 12.32)    | 8.88<br>(8.53 to 9.27)       | 7.08<br>(6.79 to 7.39)       | 5.63<br>(5.39 to 5.88)       | 4.62<br>(4.41 to 4.84)     | 3.58<br>(3.13 to 4.14)    |
| Italy                     | 32.75<br>(32.40 to 33.11)    | 23.32<br>(23.00 to 23.62)    | 16.46<br>(16.14 to 16.80)    | 11.91<br>(11.65 to 12.16)    | 9.29<br>(9.07 to 9.52)       | 7.38<br>(7.17 to 7.59)       | 5.34<br>(5.18 to 5.51)       | 4.28<br>(4.14 to 4.44)       | 3.97<br>(3.84 to 4.11)     | 3.21<br>(2.53 to 4.05)    |
| Luxembourg                | 24.07<br>(22.49 to 25.86)    | 17.00<br>(15.77 to 18.35)    | 13.53<br>(12.41 to 14.72)    | 11.29<br>(10.36 to 12.29)    | 8.99<br>(8.15 to 9.85)       | 6.89<br>(5.38 to 6.53)       | 5.92<br>(4.22 to 5.22)       | 4.68<br>(3.05 to 3.85)       | 3.40<br>(2.56 to 3.34)     | 2.15<br>(1.82 to 2.56)    |
| Malta                     | 27.95<br>(26.39 to 29.81)    | 20.57<br>(19.21 to 21.99)    | 16.40<br>(15.31 to 17.50)    | 13.82<br>(12.79 to 14.84)    | 10.45<br>(9.63 to 11.26)     | 9.57<br>(8.74 to 10.38)      | 7.76<br>(7.01 to 8.54)       | 6.26<br>(6.55 to 8.10)       | 5.00<br>(6.54 to 8.12)     | 3.28<br>(5.38 to 7.34)    |
| Netherlands               | 16.23<br>(15.83 to 16.66)    | 13.77<br>(13.37 to 14.18)    | 10.85<br>(10.50 to 11.20)    | 9.81<br>(9.47 to 10.18)      | 8.67<br>(8.37 to 8.97)       | 7.00<br>(6.74 to 7.29)       | 6.33<br>(6.09 to 6.58)       | 5.55<br>(5.35 to 5.77)       | 4.42<br>(4.23 to 4.62)     | 3.80<br>(4.20 to 4.73)    |
| Norway                    | 16.71<br>(16.04 to 17.40)    | 13.73<br>(13.11 to 14.35)    | 10.26<br>(9.72 to 10.89)     | 8.28<br>(9.75 to 10.84)      | 6.61<br>(8.15 to 9.09)       | 5.55<br>(5.23 to 5.87)       | 4.94<br>(4.63 to 5.23)       | 4.01<br>(3.73 to 4.30)       | 3.24<br>(3.01 to 3.47)     | 2.71<br>(2.31 to 3.19)    |
| Portugal                  | 64.48<br>(63.98 to 64.98)    | 43.44<br>(42.95 to 43.95)    | 29.10<br>(28.78 to 29.44)    | 20.64<br>(20.36 to 20.92)    | 14.16<br>(13.92 to 14.38)    | 9.72<br>(9.53 to 9.92)       | 7.02<br>(6.85 to 7.20)       | 4.98<br>(4.84 to 5.15)       | 3.77<br>(3.64 to 3.90)     | 3.12<br>(2.91 to 3.35)    |
| Spain                     | 31.70<br>(31.30 to 32.12)    | 21.82<br>(21.48 to 22.15)    | 15.16<br>(14.89 to 15.45)    | 11.11<br>(10.85 to 11.37)    | 9.39<br>(9.13 to 9.66)       | 6.91<br>(6.70 to 7.12)       | 5.30<br>(5.12 to 5.49)       | 4.60<br>(4.44 to 4.77)       | 3.85<br>(3.71 to 3.99)     | 3.26<br>(2.83 to 3.77)    |
| Sweden                    | 13.35<br>(12.74 to 13.92)    | 10.44<br>(9.93 to 11.00)     | 8.08<br>(7.66 to 8.57)       | 7.08<br>(6.67 to 7.51)       | 6.91<br>(6.54 to 7.30)       | 4.75<br>(4.47 to 5.04)       | 3.95<br>(3.66 to 4.25)       | 3.36<br>(3.12 to 3.61)       | 3.13<br>(2.88 to 3.41)     | 2.64<br>(2.16 to 3.22)    |
| Stockholm                 | 13.29<br>(9.98 to 17.56)     | 10.70<br>(7.87 to 14.10)     | 8.71<br>(7.73 to 9.82)       | 7.04<br>(6.26 to 7.87)       | 6.82<br>(6.19 to 7.48)       | 4.90<br>(4.36 to 5.52)       | 3.92<br>(3.44 to 4.41)       | 3.28<br>(2.89 to 3.71)       | 2.57<br>(2.24 to 2.91)     | 2.28<br>(1.85 to 2.80)    |
| Sweden except Stockholm   | 13.40<br>(12.56 to 14.23)    | 10.40<br>(9.65 to 11.12)     | 7.97<br>(7.52 to 8.45)       | 7.09<br>(6.67 to 7.51)       | 6.91<br>(6.51 to 7.32)       | 4.71<br>(4.42 to 5.00)       | 3.95<br>(3.66 to 4.23)       | 3.39<br>(3.14 to 3.65)       | 3.28<br>(3.02 to 3.54)     | 2.74<br>(2.21 to 3.38)    |
| Switzerland               | 18.41<br>(17.89 to 18.95)    | 13.73<br>(13.27 to 14.18)    | 10.44<br>(10.03 to 10.86)    | 8.85<br>(8.49 to 9.22)       | 8.47<br>(8.10 to 8.82)       | 6.28<br>(5.99 to 6.61)       | 5.81<br>(5.53 to 6.11)       | 5.02<br>(4.75 to 5.30)       | 4.46<br>(4.22 to 4.72)     | 3.95<br>(3.31 to 4.72)    |
| United Kingdom            | 21.66<br>(21.32 to 22.00)    | 18.43<br>(18.11 to 18.74)    | 14.51<br>(14.24 to 14.78)    | 11.37<br>(11.13 to 11.60)    | 9.52<br>(9.33 to 9.73)       | 7.33<br>(7.17 to 7.50)       | 6.63<br>(6.44 to 6.82)       | 5.92<br>(5.82 to 6.03)       | 5.12<br>(4.99 to 5.25)     | 4.57<br>(4.19 to 4.99)    |
| England                   | 20.92<br>(20.35 to 21.44)    | 17.77<br>(17.34 to 18.18)    | 14.21<br>(13.90 to 14.54)    | 11.19<br>(10.99 to 11.40)    | 9.53<br>(9.35 to 9.71)       | 7.28<br>(7.13 to 7.43)       | 6.64<br>(6.43 to 6.86)       | 5.91<br>(5.79 to 6.05)       | 5.14<br>(5.02 to 5.27)     | 4.59<br>(4.26 to 4.95)    |
| East Midlands             | 20.43<br>(19.02 to 21.84)    | 17.33<br>(16.34 to 18.25)    | 13.84<br>(12.90 to 14.72)    | 10.61<br>(10.06 to 11.19)    | 9.57<br>(9.09 to 10.06)      | 7.09<br>(6.72 to 7.47)       | 6.53<br>(6.13 to 6.97)       | 5.90<br>(5.58 to 6.24)       | 5.13<br>(4.83 to 5.42)     | 5.06<br>(4.56 to 5.63)    |
| East of England           | 18.90<br>(16.12 to 21.90)    | 15.63<br>(13.79 to 17.53)    | 12.35<br>(11.22 to 13.54)    | 9.77<br>(9.31 to 10.24)      | 7.48<br>(7.06 to 7.91)       | 6.25<br>(5.90 to             |                              |                              |                            |                           |

Appendix Table 11A. Under-5 mortality rates by location, both sexes combined, 1970, 1975, 1980, 1985, 1990, 1995, 2000, 2005, 2010, 2016

| Location                                         | 1970                         | 1975                         | 1980                         | 1985                         | 1990                       | 1995                       | 2000                       | 2005                      | 2010                      | 2016                      |
|--------------------------------------------------|------------------------------|------------------------------|------------------------------|------------------------------|----------------------------|----------------------------|----------------------------|---------------------------|---------------------------|---------------------------|
| Northern Ireland                                 | 27.46<br>(25.89 to 29.09)    | 21.80<br>(20.49 to 23.09)    | 16.06<br>(14.95 to 17.19)    | 12.17<br>(11.27 to 13.21)    | 9.52<br>(8.73 to 10.41)    | 8.25<br>(7.50 to 9.02)     | 6.54<br>(5.86 to 7.27)     | 6.58<br>(5.98 to 7.26)    | 5.94<br>(5.34 to 6.61)    | 4.81<br>(3.28 to 6.82)    |
| Scotland                                         | 22.91<br>(22.19 to 23.58)    | 20.12<br>(19.41 to 20.84)    | 14.35<br>(13.77 to 14.96)    | 11.59<br>(11.02 to 12.13)    | 9.51<br>(9.03 to 10.02)    | 7.45<br>(7.01 to 7.88)     | 6.48<br>(6.07 to 6.86)     | 5.91<br>(5.52 to 6.29)    | 4.52<br>(4.23 to 4.81)    | 4.08<br>(3.20 to 5.15)    |
| Wales                                            | 22.79<br>(17.69 to 29.39)    | 19.64<br>(15.08 to 25.05)    | 15.77<br>(13.95 to 17.77)    | 11.72<br>(11.01 to 12.47)    | 8.78<br>(8.23 to 9.34)     | 7.18<br>(6.70 to 7.67)     | 6.35<br>(5.90 to 6.85)     | 5.24<br>(4.84 to 5.67)    | 4.69<br>(4.35 to 5.06)    | 4.35<br>(3.55 to 5.30)    |
| Southern Latin America                           | 84.98<br>(84.56 to 85.37)    | 66.93<br>(66.43 to 67.51)    | 43.24<br>(43.01 to 43.48)    | 32.38<br>(32.19 to 32.56)    | 28.52<br>(28.34 to 28.70)  | 23.44<br>(23.29 to 23.60)  | 17.78<br>(17.65 to 17.92)  | 14.56<br>(14.44 to 14.67) | 12.68<br>(12.54 to 12.83) | 11.00<br>(10.46 to 11.61) |
| Argentina                                        | 82.51<br>(81.89 to 83.14)    | 66.09<br>(65.33 to 66.92)    | 44.25<br>(43.97 to 44.55)    | 35.03<br>(34.80 to 35.28)    | 32.59<br>(32.35 to 32.81)  | 27.98<br>(27.77 to 28.20)  | 20.46<br>(20.30 to 20.64)  | 16.32<br>(16.18 to 16.47) | 14.00<br>(13.87 to 14.14) | 12.20<br>(11.73 to 12.72) |
| Chile                                            | 96.64<br>(96.04 to 97.24)    | 71.00<br>(70.48 to 71.53)    | 39.81<br>(39.42 to 40.20)    | 24.99<br>(24.70 to 25.29)    | 20.28<br>(20.02 to 20.54)  | 14.09<br>(13.90 to 14.28)  | 11.04<br>(10.87 to 11.21)  | 9.42<br>(9.26 to 9.58)    | 9.07<br>(8.87 to 9.31)    | 7.85<br>(7.41 to 8.32)    |
| Uruguay                                          | 55.02<br>(53.42 to 56.63)    | 58.87<br>(57.25 to 60.60)    | 46.66<br>(45.09 to 48.26)    | 36.83<br>(35.42 to 38.26)    | 25.79<br>(24.74 to 26.87)  | 21.91<br>(20.95 to 22.80)  | 16.01<br>(15.24 to 16.76)  | 14.18<br>(13.49 to 14.94) | 10.81<br>(9.62 to 12.31)  | 8.76<br>(6.75 to 11.31)   |
| Central Europe, Eastern Europe, and Central Asia | 52.81<br>(47.36 to 58.98)    | 44.97<br>(42.30 to 47.98)    | 40.32<br>(38.43 to 42.41)    | 36.37<br>(34.98 to 37.80)    | 32.35<br>(31.06 to 33.69)  | 33.26<br>(31.57 to 35.13)  | 28.00<br>(26.20 to 29.97)  | 21.86<br>(19.84 to 24.11) | 16.76<br>(14.71 to 19.16) | 13.55<br>(10.91 to 17.05) |
| Eastern Europe                                   | 32.66<br>(28.95 to 37.63)    | 31.87<br>(29.00 to 35.53)    | 29.55<br>(27.78 to 31.61)    | 25.79<br>(24.68 to 27.07)    | 21.34<br>(20.37 to 22.40)  | 22.52<br>(21.37 to 23.81)  | 19.83<br>(18.64 to 21.24)  | 13.90<br>(13.07 to 14.90) | 9.91<br>(9.25 to 10.70)   | 8.35<br>(7.61 to 9.38)    |
| Belarus                                          | 36.13<br>(29.02 to 44.28)    | 30.14<br>(24.67 to 36.55)    | 26.30<br>(21.70 to 31.36)    | 23.89<br>(19.97 to 28.57)    | 20.58<br>(17.15 to 24.61)  | 18.72<br>(15.48 to 22.38)  | 16.07<br>(13.17 to 19.31)  | 11.65<br>(9.39 to 14.20)  | 7.95<br>(6.21 to 10.17)   | 5.53<br>(4.19 to 7.43)    |
| Estonia                                          | 21.84<br>(20.54 to 23.20)    | 22.17<br>(20.87 to 23.53)    | 22.67<br>(21.33 to 24.07)    | 20.25<br>(19.00 to 21.61)    | 16.90<br>(15.85 to 17.98)  | 18.50<br>(17.15 to 19.75)  | 11.28<br>(10.26 to 12.34)  | 7.28<br>(6.56 to 8.18)    | 4.80<br>(4.22 to 5.44)    | 3.15<br>(2.40 to 4.07)    |
| Latvia                                           | 22.08<br>(20.84 to 23.32)    | 25.93<br>(24.58 to 27.31)    | 21.57<br>(20.41 to 22.75)    | 17.39<br>(16.34 to 18.45)    | 17.60<br>(16.63 to 18.63)  | 20.77<br>(19.55 to 22.01)  | 13.14<br>(12.12 to 14.32)  | 9.90<br>(9.00 to 10.83)   | 7.85<br>(7.10 to 8.69)    | 4.82<br>(3.32 to 6.80)    |
| Lithuania                                        | 23.13<br>(22.27 to 24.05)    | 23.91<br>(23.05 to 24.93)    | 19.25<br>(18.42 to 20.07)    | 18.91<br>(18.09 to 19.72)    | 13.73<br>(13.14 to 14.38)  | 15.81<br>(15.09 to 16.51)  | 11.24<br>(10.62 to 11.87)  | 8.76<br>(8.18 to 9.33)    | 5.92<br>(5.53 to 6.39)    | 4.66<br>(4.09 to 5.30)    |
| Moldova                                          | 71.19<br>(47.98 to 102.04)   | 61.83<br>(42.52 to 86.87)    | 55.90<br>(44.36 to 69.31)    | 43.26<br>(35.44 to 51.99)    | 32.28<br>(26.30 to 38.81)  | 35.07<br>(28.89 to 42.29)  | 31.40<br>(25.25 to 38.27)  | 16.81<br>(12.87 to 21.44) | 16.09<br>(12.07 to 20.75) | 11.63<br>(7.71 to 16.80)  |
| Russia                                           | 28.15<br>(28.03 to 28.29)    | 29.74<br>(29.60 to 29.86)    | 28.28<br>(28.05 to 28.51)    | 26.16<br>(25.87 to 26.42)    | 21.53<br>(21.43 to 21.63)  | 23.08<br>(22.84 to 23.31)  | 19.83<br>(19.46 to 20.22)  | 13.72<br>(13.61 to 13.83) | 9.61<br>(9.54 to 9.68)    | 8.37<br>(8.09 to 8.70)    |
| Ukraine                                          | 41.16<br>(26.60 to 59.55)    | 35.98<br>(24.92 to 49.77)    | 32.17<br>(24.58 to 41.17)    | 24.14<br>(19.56 to 29.97)    | 20.61<br>(16.68 to 24.96)  | 21.11<br>(17.00 to 26.02)  | 20.91<br>(16.18 to 26.51)  | 15.42<br>(11.65 to 20.11) | 11.33<br>(8.33 to 14.92)  | 9.18<br>(5.68 to 14.10)   |
| Central Europe                                   | 44.49<br>(41.41 to 48.23)    | 34.19<br>(32.00 to 36.62)    | 28.56<br>(27.26 to 30.00)    | 24.51<br>(23.69 to 25.41)    | 21.80<br>(21.27 to 22.40)  | 18.64<br>(18.20 to 19.12)  | 13.73<br>(13.27 to 14.21)  | 10.58<br>(10.26 to 10.92) | 7.90<br>(7.67 to 8.14)    | 6.20<br>(5.12 to 7.61)    |
| Albania                                          | 108.90<br>(73.32 to 158.98)  | 79.04<br>(54.18 to 110.32)   | 62.35<br>(47.10 to 80.39)    | 49.70<br>(46.30 to 64.19)    | 40.70<br>(34.65 to 47.59)  | 40.70<br>(31.43 to 43.17)  | 21.94<br>(22.65 to 33.11)  | 21.94<br>(17.01 to 27.62) | 17.34<br>(12.24 to 23.89) | 13.72<br>(9.12 to 20.19)  |
| Bosnia and Herzegovina                           | 54.29<br>(39.33 to 74.75)    | 42.98<br>(32.84 to 55.76)    | 33.08<br>(27.08 to 39.84)    | 24.85<br>(23.84 to 25.86)    | 24.85<br>(15.97 to 17.25)  | 18.25<br>(19.14 to 24.38)  | 16.49<br>(10.39 to 11.53)  | 12.90<br>(8.11 to 9.18)   | 11.27<br>(6.39 to 7.20)   | 8.34<br>(4.46 to 5.99)    |
| Bulgaria                                         | 32.12<br>(31.21 to 33.06)    | 27.39<br>(26.56 to 28.23)    | 24.27<br>(23.54 to 25.07)    | 18.85<br>(18.15 to 19.57)    | 18.85<br>(17.68 to 19.10)  | 18.25<br>(17.47 to 19.06)  | 16.49<br>(15.67 to 17.36)  | 12.90<br>(12.17 to 13.63) | 11.27<br>(10.64 to 11.94) | 8.34<br>(5.69 to 12.02)   |
| Croatia                                          | 36.05<br>(25.64 to 50.11)    | 28.57<br>(21.29 to 36.91)    | 22.80<br>(18.57 to 27.63)    | 18.23<br>(17.40 to 19.12)    | 12.62<br>(12.07 to 13.20)  | 11.89<br>(10.83 to 13.01)  | 9.13<br>(8.64 to 9.63)     | 6.91<br>(6.52 to 7.34)    | 5.54<br>(5.20 to 5.90)    | 4.52<br>(3.83 to 5.31)    |
| Czech Republic                                   | 24.00<br>(23.23 to 24.77)    | 21.86<br>(21.23 to 22.49)    | 18.52<br>(17.96 to 19.11)    | 14.35<br>(13.81 to 14.91)    | 11.87<br>(11.36 to 12.43)  | 9.07<br>(8.62 to 9.56)     | 5.37<br>(5.00 to 5.76)     | 4.28<br>(3.99 to 4.59)    | 3.49<br>(3.25 to 3.75)    | 2.82<br>(2.38 to 3.34)    |
| Hungary                                          | 40.01<br>(39.13 to 40.95)    | 36.90<br>(36.11 to 37.70)    | 25.04<br>(24.39 to 25.75)    | 22.48<br>(21.77 to 23.23)    | 17.03<br>(16.42 to 17.67)  | 12.63<br>(12.11 to 13.18)  | 10.57<br>(10.08 to 11.13)  | 7.48<br>(7.07 to 7.94)    | 5.99<br>(5.60 to 6.39)    | 5.58<br>(4.49 to 6.94)    |
| Macedonia                                        | 69.48<br>(39.03 to 112.77)   | 56.68<br>(32.00 to 91.81)    | 53.17<br>(37.35 to 74.46)    | 42.48<br>(30.56 to 57.26)    | 35.57<br>(33.99 to 37.17)  | 23.80<br>(22.48 to 25.12)  | 14.42<br>(13.44 to 15.45)  | 13.83<br>(12.82 to 14.97) | 9.74<br>(8.90 to 10.71)   | 10.06<br>(6.39 to 15.28)  |
| Montenegro                                       | 33.48<br>(21.88 to 50.01)    | 28.19<br>(18.89 to 43.15)    | 23.36<br>(15.62 to 34.41)    | 19.23<br>(12.85 to 27.39)    | 15.39<br>(11.41 to 20.18)  | 15.50<br>(13.80 to 17.30)  | 16.95<br>(15.41 to 18.54)  | 10.82<br>(9.87 to 11.83)  | 8.86<br>(6.12 to 7.67)    | 5.10<br>(3.90 to 6.56)    |
| Poland                                           | 38.56<br>(38.05 to 39.08)    | 28.64<br>(28.24 to 29.07)    | 24.63<br>(24.26 to 25.00)    | 21.02<br>(20.70 to 21.35)    | 18.57<br>(18.24 to 18.91)  | 15.98<br>(15.64 to 16.34)  | 9.57<br>(9.28 to 9.87)     | 7.46<br>(7.21 to 7.72)    | 5.86<br>(5.65 to 6.09)    | 4.50<br>(3.04 to 6.54)    |
| Romania                                          | 56.07<br>(55.40 to 56.79)    | 40.88<br>(40.30 to 41.46)    | 34.60<br>(34.06 to 35.09)    | 31.41<br>(30.88 to 31.94)    | 27.05<br>(33.45 to 34.58)  | 20.24<br>(25.28 to 26.47)  | 15.13<br>(22.72 to 23.94)  | 12.35<br>(17.74 to 18.81) | 10.24<br>(12.89 to 13.80) | 7.89<br>(8.15 to 11.02)   |
| Serbia                                           | 43.95<br>(29.08 to 63.09)    | 36.05<br>(24.75 to 51.53)    | 31.17<br>(21.53 to 43.19)    | 27.05<br>(19.37 to 36.21)    | 20.24<br>(15.59 to 25.96)  | 15.13<br>(20.69 to 22.26)  | 12.35<br>(12.54 to 18.20)  | 10.24<br>(10.22 to 14.87) | 7.89<br>(9.75 to 10.76)   | 6.05<br>(6.58 to 9.30)    |
| Slovakia                                         | 28.81<br>(29.56 to 31.66)    | 22.66<br>(26.86 to 28.89)    | 18.19<br>(22.84 to 24.62)    | 15.13<br>(17.80 to 19.36)    | 10.18<br>(13.52 to 14.92)  | 7.15<br>(11.79 to 13.22)   | 5.43<br>(9.26 to 10.61)    | 4.37<br>(8.07 to 9.30)    | 3.22<br>(6.09 to 7.11)    | 2.37<br>(4.56 to 7.99)    |
| Slovenia                                         | 105.82<br>(89.78 to 124.27)  | 88.50<br>(80.29 to 96.85)    | 77.25<br>(72.15 to 82.90)    | 68.91<br>(64.97 to 73.00)    | 59.10<br>(55.21 to 63.32)  | 58.99<br>(54.60 to 64.15)  | 50.13<br>(45.43 to 55.40)  | 40.74<br>(34.95 to 47.35) | 31.68<br>(25.74 to 38.45) | 24.50<br>(17.92 to 32.91) |
| Central Asia                                     | 107.70<br>(78.74 to 143.76)  | 82.94<br>(65.10 to 103.83)   | 68.41<br>(57.55 to 80.79)    | 56.18<br>(48.85 to 64.43)    | 45.53<br>(39.22 to 52.33)  | 43.19<br>(37.26 to 50.00)  | 30.71<br>(26.14 to 36.37)  | 23.72<br>(18.99 to 29.25) | 16.98<br>(13.21 to 21.34) | 12.11<br>(8.94 to 16.07)  |
| Armenia                                          | 126.62<br>(91.87 to 167.36)  | 96.44<br>(71.18 to 127.73)   | 89.49<br>(72.01 to 110.14)   | 85.70<br>(71.37 to 99.66)    | 77.56<br>(65.00 to 90.73)  | 76.06<br>(64.67 to 89.09)  | 62.90<br>(53.18 to 74.78)  | 51.14<br>(41.87 to 61.62) | 38.58<br>(27.79 to 51.05) | 30.01<br>(21.36 to 41.08) |
| Azerbaijan                                       | 101.68<br>(78.25 to 129.66)  | 77.22<br>(63.05 to 93.14)    | 58.61<br>(51.16 to 67.47)    | 47.94<br>(42.63 to 53.34)    | 42.66<br>(38.24 to 47.61)  | 42.75<br>(38.31 to 48.00)  | 37.90<br>(33.31 to 42.98)  | 27.73<br>(22.95 to 32.99) | 20.66<br>(16.17 to 26.05) | 15.42<br>(11.42 to 20.44) |
| Georgia                                          | 61.55<br>(47.36 to 77.64)    | 54.90<br>(46.96 to 63.74)    | 41.82<br>(42.00 to 55.25)    | 41.82<br>(37.04 to 47.18)    | 41.82<br>(32.78 to 41.41)  | 40.51<br>(35.10 to 46.31)  | 36.92<br>(30.78 to 43.58)  | 29.31<br>(23.50 to 36.05) | 20.24<br>(16.12 to 24.84) | 13.49<br>(9.89 to 18.01)  |
| Kazakhstan                                       | 135.91<br>(116.74 to 157.15) | 111.86<br>(100.58 to 123.93) | 94.84<br>(86.74 to 102.90)   | 81.09<br>(75.35 to 86.83)    | 66.18<br>(61.80 to 70.66)  | 56.35<br>(52.56 to 60.38)  | 49.83<br>(45.98 to 53.63)  | 41.89<br>(38.41 to 45.56) | 35.45<br>(31.84 to 39.22) | 28.94<br>(24.23 to 34.35) |
| Kyrgyzstan                                       | 151.94<br>(128.47 to 176.99) | 136.39<br>(118.33 to 156.91) | 124.66<br>(110.64 to 139.32) | 109.91<br>(100.61 to 120.05) | 91.89<br>(84.21 to 99.44)  | 75.12<br>(68.59 to 81.83)  | 57.58<br>(52.17 to 63.19)  | 41.03<br>(36.27 to 45.88) | 29.48<br>(25.44 to 34.10) | 21.21<br>(16.71 to 26.59) |
| Mongolia                                         | 190.29<br>(145.73 to 241.74) | 169.62<br>(140.46 to 202.71) | 135.92<br>(116.35 to 154.60) | 117.25<br>(101.35 to 134.13) | 98.58<br>(85.50 to 111.90) | 92.73<br>(80.63 to 105.07) | 74.67<br>(64.40 to 86.46)  | 54.23<br>(45.29 to 64.32) | 43.87<br>(35.42 to 54.16) | 37.57<br>(27.10 to 50.82) |
| Tajikistan                                       | 180.44<br>(126.11 to 244.80) | 149.62<br>(108.17 to 198.49) | 124.39<br>(99.50 to 155.34)  | 106.06<br>(89.14 to 124.44)  | 92.38<br>(77.33 to 108.07) | 88.26<br>(73.89 to 105.97) | 80.85<br>(64.36 to 100.76) | 65.81<br>(48.61 to 84.48) | 49.99<br>(35.67 to 67.31) | 37.02<br>(25.16 to 52.60) |
| Turkmenistan                                     | 92.55<br>(69.88 to 122.24)   | 75.41<br>(61.90 to 90.08)    | 67.89<br>(57.81 to 78.53)    | 61.05<br>(52.79 to 70.47)    | 48.89<br>(42.28 to 56.09)  | 50.92<br>(44.47 to 58.71)  | 42.57<br>(35.76 to 50.65)  | 34.64<br>(28.15 to 49.18) | 30.64<br>(22.26 to 41.06) | 23.49<br>(16.75 to 32.12) |
| Uzbekistan                                       | 118.46<br>(111.12 to 125.77) | 99.30<br>(94.48 to 104.84)   | 79.87<br>(75.89 to 84.27)    | 65.34<br>(62.28 to 68.72)    | 51.95<br>(49.71 to 54.41)  | 41.83<br>(39.48 to 44.46)  | 33.07<br>(30.64 to 35.52)  | 27.73<br>(25.68 to 29.97) | 25.73<br>(22.22 to 29.97) | 18.69<br>(14.73 to 23.77) |
| Latin America and Caribbean                      | 105.84<br>(101.86 to 109.85) | 87.86<br>(84.32 to 91.63)    | 68.31<br>(65.00 to 71.66)    | 54.21<br>(51.47 to 56.93)    | 42.66<br>(40.69 to 45.53)  | 35.59<br>(33.37 to 38.00)  | 28.73<br>(26.42 to 30.96)  | 23.93<br>(21.75 to 26.11) | 20.21<br>(17.82 to 22.77) | 16.70<br>(13.96 to 20.06) |
| Central Latin America                            | 94.12<br>(88.02 to 100.46)   | 75.29<br>(70.21 to 80.54)    | 53.87<br>(49.84 to 58.30)    | 43.96<br>(40.40 to 47.96)    | 33.92<br>(31.06 to 36.92)  | 33.92<br>(27.97 to 33.65)  | 26.65<br>(23.83 to 29.53)  | 23.78<br>(20.99 to 26.95) | 19.97<br>(17.03 to 23.55) | 15.48<br>(12.60 to 19.00) |
| Colombia                                         | 69.82<br>(65.44 to 74.48)    | 48.49<br>(44.57 to 52.38)    | 32.12<br>(28.88 to 35.58)    | 24.08<br>(21.33 to 27.07)    | 19.95<br>(17.34 to 22.82)  | 17.29<br>(14.67 to 20.36)  | 15.41<br>(12.88 to 18.56)  | 13.91<br>(11.55 to 16.72) | 12.50<br>(10.19 to 15.13) | 10.58<br>(8.15 to 13.67)  |
| Costa Rica                                       | 148.81<br>(132.14 to 165.68) | 118.41<br>(106.45 to 130.71) | 95.35<br>(86.64 to 105.13)   | 75.64<br>(68.64 to 82.96)    | 53.34<br>(48.31 to 59.45)  | 39.48<br>(34.97 to 44.06)  | 29.33<br>(25.72 to 33.62)  | 20.72<br>(17.54 to 24.32) | 15.78<br>(12.93 to 18.95) | 11.88<br>(9.53 to 14.79)  |
| El Salvador                                      | 178.90<br>(168.48 to 190.20) | 150.01<br>(141.93 to 157.71) | 124.14<br>(118.10 to 130.56) | 100.42<br>(95.49 to 105.48)  |                            |                            |                            |                           |                           |                           |



Appendix Table 11A. Under-5 mortality rates by location, both sexes combined, 1970, 1975, 1980, 1985, 1990, 1995, 2000, 2005, 2010, 2016

| Location                               | 1970                         | 1975                         | 1980                         | 1985                         | 1990                         | 1995                         | 2000                         | 2005                        | 2010                       | 2016                      |
|----------------------------------------|------------------------------|------------------------------|------------------------------|------------------------------|------------------------------|------------------------------|------------------------------|-----------------------------|----------------------------|---------------------------|
| Andean Latin America                   | 191.60<br>(179.05 to 204.99) | 149.95<br>(144.14 to 156.08) | 122.97<br>(116.36 to 129.74) | 99.73<br>(95.65 to 103.94)   | 78.03<br>(75.10 to 81.02)    | 59.66<br>(57.47 to 61.92)    | 44.30<br>(42.29 to 46.38)    | 34.88<br>(32.70 to 37.14)   | 26.97<br>(23.98 to 30.22)  | 20.36<br>(16.25 to 25.40) |
| Bolivia                                | 229.97<br>(215.71 to 244.20) | 192.59<br>(182.32 to 202.94) | 159.82<br>(151.36 to 168.57) | 135.80<br>(129.02 to 142.54) | 114.36<br>(108.29 to 120.76) | 92.38<br>(86.61 to 98.30)    | 72.60<br>(66.67 to 78.73)    | 58.32<br>(51.62 to 65.37)   | 45.76<br>(38.30 to 54.09)  | 33.79<br>(26.33 to 43.16) |
| Ecuador                                | 127.01<br>(120.30 to 133.79) | 101.69<br>(96.86 to 106.89)  | 77.37<br>(73.79 to 81.47)    | 60.24<br>(57.09 to 63.46)    | 48.18<br>(45.65 to 51.01)    | 39.45<br>(36.94 to 41.97)    | 32.82<br>(30.14 to 35.70)    | 27.07<br>(24.28 to 30.14)   | 21.70<br>(18.87 to 24.78)  | 17.27<br>(14.50 to 20.71) |
| Peru                                   | 205.93<br>(184.36 to 230.31) | 155.86<br>(146.52 to 165.24) | 131.05<br>(122.84 to 139.61) | 105.75<br>(99.84 to 111.46)  | 79.32<br>(74.68 to 84.05)    | 57.21<br>(53.84 to 60.87)    | 38.18<br>(35.78 to 40.65)    | 28.60<br>(26.67 to 30.54)   | 21.85<br>(19.82 to 23.85)  | 16.61<br>(13.23 to 20.81) |
| Caribbean                              | 112.24<br>(104.71 to 120.52) | 100.57<br>(94.20 to 107.37)  | 93.28<br>(85.86 to 101.58)   | 80.29<br>(74.48 to 87.42)    | 69.05<br>(63.05 to 75.07)    | 60.45<br>(55.64 to 66.63)    | 50.06<br>(45.13 to 55.58)    | 48.16<br>(42.86 to 53.86)   | 74.52<br>(47.84 to 109.03) | 33.48<br>(23.62 to 46.84) |
| Antigua and Barbuda                    | 33.44<br>(24.74 to 43.44)    | 27.37<br>(19.78 to 36.94)    | 20.95<br>(14.82 to 28.52)    | 14.76<br>(10.54 to 20.16)    | 14.62<br>(10.49 to 19.62)    | 16.84<br>(12.41 to 22.10)    | 16.39<br>(12.23 to 21.96)    | 14.45<br>(10.80 to 19.55)   | 12.46<br>(9.06 to 17.66)   | 11.16<br>(7.40 to 16.47)  |
| The Bahamas                            | 48.70<br>(32.48 to 69.73)    | 40.01<br>(27.02 to 56.40)    | 33.16<br>(21.76 to 48.93)    | 27.66<br>(17.26 to 41.12)    | 22.52<br>(13.64 to 34.58)    | 17.90<br>(11.78 to 26.33)    | 14.01<br>(9.16 to 19.93)     | 14.14<br>(9.67 to 19.54)    | 12.30<br>(8.17 to 18.25)   | 10.98<br>(5.86 to 20.34)  |
| Barbados                               | 46.01<br>(31.93 to 64.10)    | 33.91<br>(23.05 to 48.03)    | 25.43<br>(16.70 to 37.72)    | 21.37<br>(13.31 to 32.50)    | 18.77<br>(11.22 to 29.28)    | 17.79<br>(10.68 to 28.10)    | 17.81<br>(10.64 to 27.61)    | 16.90<br>(11.21 to 23.84)   | 15.50<br>(10.35 to 22.44)  | 14.73<br>(7.91 to 25.69)  |
| Belize                                 | 98.87<br>(77.98 to 122.60)   | 77.05<br>(63.08 to 93.40)    | 62.27<br>(50.57 to 74.12)    | 47.39<br>(39.13 to 56.30)    | 39.60<br>(32.86 to 47.52)    | 29.72<br>(23.50 to 37.33)    | 28.06<br>(21.84 to 35.28)    | 22.14<br>(16.40 to 30.07)   | 17.52<br>(12.40 to 24.05)  | 15.06<br>(8.79 to 24.64)  |
| Bermuda                                | 27.47<br>(22.85 to 32.76)    | 22.45<br>(18.17 to 27.37)    | 21.19<br>(16.95 to 25.97)    | 14.35<br>(11.10 to 18.52)    | 12.13<br>(9.42 to 15.53)     | 9.49<br>(7.15 to 12.69)      | 4.37<br>(2.95 to 6.43)       | 6.20<br>(4.56 to 8.26)      | 4.76<br>(3.38 to 6.51)     | 3.89<br>(2.53 to 5.82)    |
| Cuba                                   | 40.60<br>(40.29 to 40.94)    | 30.12<br>(29.82 to 30.41)    | 23.87<br>(23.42 to 24.37)    | 18.97<br>(18.37 to 19.65)    | 13.98<br>(13.61 to 14.39)    | 11.28<br>(11.07 to 11.48)    | 8.66<br>(8.50 to 8.83)       | 7.18<br>(7.03 to 7.34)      | 6.08<br>(5.92 to 6.23)     | 5.31<br>(5.01 to 5.67)    |
| Dominica                               | 56.76<br>(41.66 to 74.51)    | 34.93<br>(24.92 to 46.96)    | 22.50<br>(15.61 to 30.24)    | 18.31<br>(12.52 to 25.27)    | 17.01<br>(11.84 to 23.62)    | 17.53<br>(12.43 to 23.61)    | 18.66<br>(13.36 to 25.23)    | 20.35<br>(15.01 to 27.72)   | 23.67<br>(16.94 to 33.83)  | 24.95<br>(15.65 to 38.47) |
| Dominican Republic                     | 127.06<br>(114.83 to 139.62) | 107.00<br>(96.56 to 117.58)  | 86.85<br>(78.95 to 93.43)    | 72.52<br>(66.22 to 79.54)    | 60.39<br>(54.93 to 66.10)    | 46.72<br>(42.33 to 51.55)    | 37.43<br>(33.76 to 41.53)    | 36.93<br>(33.00 to 41.20)   | 32.68<br>(28.50 to 37.50)  | 27.42<br>(21.69 to 34.46) |
| Grenada                                | 53.61<br>(32.88 to 81.07)    | 45.33<br>(26.14 to 70.22)    | 35.46<br>(18.03 to 63.58)    | 26.72<br>(13.33 to 49.41)    | 19.76<br>(11.15 to 33.59)    | 16.23<br>(9.89 to 24.19)     | 15.48<br>(9.88 to 22.44)     | 14.33<br>(8.98 to 21.61)    | 14.55<br>(9.59 to 21.45)   | 15.42<br>(8.42 to 27.94)  |
| Guyana                                 | 89.36<br>(82.84 to 96.46)    | 77.96<br>(70.80 to 85.19)    | 64.84<br>(58.60 to 71.45)    | 57.76<br>(52.83 to 62.98)    | 52.17<br>(48.30 to 56.11)    | 49.37<br>(41.45 to 48.45)    | 39.18<br>(35.98 to 42.80)    | 37.31<br>(33.86 to 41.05)   | 33.01<br>(28.72 to 37.78)  | 24.87<br>(19.75 to 31.25) |
| Haiti                                  | 268.20<br>(240.78 to 298.47) | 230.20<br>(208.57 to 253.05) | 202.38<br>(179.17 to 227.06) | 172.84<br>(155.03 to 193.97) | 148.85<br>(132.14 to 166.33) | 125.52<br>(112.11 to 143.62) | 100.03<br>(86.08 to 114.66)  | 88.78<br>(75.52 to 103.17)  | 58.04<br>(49.63 to 66.45)  | 55.41<br>(37.42 to 79.25) |
| Jamaica                                | 48.17<br>(48.96 to 67.89)    | 48.17<br>(40.26 to 58.48)    | 48.17<br>(31.44 to 51.46)    | 48.17<br>(26.54 to 44.19)    | 48.17<br>(22.99 to 40.39)    | 48.17<br>(19.60 to 36.73)    | 48.17<br>(17.53 to 33.45)    | 48.17<br>(14.57 to 33.68)   | 48.17<br>(13.64 to 34.52)  | 48.17<br>(12.21 to 31.69) |
| Puerto Rico                            | 29.57<br>(29.57 to 30.71)    | 22.13<br>(22.13 to 23.07)    | 19.60<br>(19.60 to 20.52)    | 16.91<br>(16.91 to 18.54)    | 15.36<br>(15.36 to 16.21)    | 14.67<br>(14.67 to 15.50)    | 12.13<br>(12.13 to 12.93)    | 10.14<br>(10.14 to 10.92)   | 8.53<br>(8.53 to 9.27)     | 5.80<br>(5.80 to 7.51)    |
| Saint Lucia                            | 62.20<br>(35.88 to 103.91)   | 43.25<br>(27.55 to 65.03)    | 30.29<br>(18.66 to 46.14)    | 24.31<br>(13.75 to 39.25)    | 21.00<br>(12.00 to 35.09)    | 19.05<br>(11.87 to 29.90)    | 18.07<br>(11.40 to 26.98)    | 19.91<br>(12.44 to 30.03)   | 20.14<br>(13.29 to 29.80)  | 17.47<br>(9.11 to 31.17)  |
| Saint Vincent and the Grenadines       | 85.91<br>(57.61 to 119.29)   | 63.14<br>(41.16 to 89.38)    | 44.62<br>(29.16 to 62.96)    | 31.69<br>(20.27 to 46.58)    | 26.62<br>(17.45 to 38.85)    | 24.33<br>(16.42 to 33.80)    | 23.28<br>(16.52 to 31.52)    | 21.62<br>(15.55 to 29.19)   | 19.39<br>(13.66 to 27.21)  | 16.63<br>(10.39 to 26.83) |
| Suriname                               | 69.12<br>(57.58 to 83.80)    | 64.42<br>(54.71 to 75.31)    | 59.03<br>(50.73 to 68.14)    | 53.97<br>(46.93 to 61.55)    | 50.05<br>(43.66 to 57.45)    | 47.42<br>(40.99 to 54.56)    | 45.41<br>(38.14 to 53.29)    | 43.32<br>(34.49 to 51.21)   | 38.92<br>(30.88 to 47.95)  | 34.76<br>(26.83 to 44.78) |
| Trinidad and Tobago                    | 52.99<br>(48.37 to 57.82)    | 47.78<br>(43.18 to 52.87)    | 37.92<br>(33.39 to 42.85)    | 30.44<br>(25.91 to 35.35)    | 28.07<br>(23.20 to 33.49)    | 27.30<br>(22.30 to 32.95)    | 24.28<br>(22.30 to 33.83)    | 23.28<br>(18.89 to 31.64)   | 21.62<br>(15.29 to 30.68)  | 19.39<br>(12.26 to 34.16) |
| Virgin Islands, U.S.                   | 115.52<br>(99.26 to 131.74)  | 98.63<br>(87.12 to 111.51)   | 78.37<br>(69.56 to 88.19)    | 65.66<br>(59.39 to 73.11)    | 51.67<br>(46.48 to 56.92)    | 40.50<br>(35.90 to 45.86)    | 31.53<br>(26.86 to 36.52)    | 25.73<br>(21.35 to 30.88)   | 20.93<br>(16.54 to 26.80)  | 17.08<br>(12.93 to 22.42) |
| Tropical Latin America                 | 114.65<br>(98.03 to 131.18)  | 98.43<br>(86.87 to 111.27)   | 78.75<br>(69.78 to 88.68)    | 65.51<br>(58.98 to 73.00)    | 52.18<br>(46.80 to 57.68)    | 41.07<br>(36.30 to 46.65)    | 31.70<br>(26.85 to 36.96)    | 25.62<br>(21.12 to 31.14)   | 20.82<br>(16.47 to 26.66)  | 16.91<br>(12.82 to 22.07) |
| Brazil                                 | 70.46<br>(63.28 to 78.42)    | 62.06<br>(56.38 to 68.16)    | 52.88<br>(47.84 to 57.99)    | 43.96<br>(40.26 to 48.28)    | 33.44<br>(30.33 to 36.65)    | 28.92<br>(25.94 to 32.12)    | 28.86<br>(25.22 to 32.64)    | 28.86<br>(22.63 to 30.92)   | 23.03<br>(17.98 to 28.90)  | 18.86<br>(14.35 to 24.65) |
| Paraguay                               | 123.48<br>(113.34 to 134.02) | 101.57<br>(94.32 to 108.99)  | 83.98<br>(78.38 to 90.19)    | 69.97<br>(65.06 to 75.31)    | 58.45<br>(54.16 to 63.11)    | 49.95<br>(46.25 to 53.99)    | 41.28<br>(38.56 to 44.22)    | 31.02<br>(29.06 to 33.00)   | 23.59<br>(21.76 to 25.59)  | 17.46<br>(15.34 to 19.89) |
| Southeast Asia, East Asia, and Oceania | 116.28<br>(103.90 to 129.67) | 92.98<br>(83.35 to 102.93)   | 76.54<br>(68.26 to 85.49)    | 63.34<br>(56.58 to 70.86)    | 52.80<br>(47.15 to 59.44)    | 45.74<br>(40.45 to 51.53)    | 36.94<br>(33.05 to 41.23)    | 34.04<br>(21.71 to 26.60)   | 33.00<br>(15.38 to 18.81)  | 25.98<br>(10.64 to 14.62) |
| East Asia                              | 118.77<br>(106.13 to 132.38) | 95.21<br>(85.08 to 105.50)   | 78.62<br>(69.98 to 87.93)    | 64.97<br>(57.85 to 72.80)    | 54.13<br>(48.29 to 60.96)    | 44.57<br>(39.69 to 49.83)    | 34.94<br>(31.41 to 38.87)    | 23.94<br>(21.50 to 26.54)   | 16.61<br>(14.93 to 18.37)  | 11.78<br>(10.24 to 13.74) |
| China                                  | 116.52<br>(106.13 to 132.38) | 98.63<br>(87.12 to 111.51)   | 78.37<br>(69.56 to 88.19)    | 65.66<br>(59.39 to 73.11)    | 51.67<br>(46.48 to 56.92)    | 40.50<br>(35.90 to 45.86)    | 31.53<br>(26.86 to 36.52)    | 25.73<br>(21.35 to 30.88)   | 20.93<br>(16.54 to 26.80)  | 17.08<br>(12.93 to 22.42) |
| North Korea                            | 52.99<br>(45.18 to 72.87)    | 47.78<br>(32.14 to 51.71)    | 37.92<br>(25.47 to 42.00)    | 30.44<br>(23.77 to 38.18)    | 28.07<br>(21.44 to 35.73)    | 27.30<br>(21.44 to 35.73)    | 24.28<br>(38.48 to 166.69)   | 23.28<br>(42.23 to 146.41)  | 21.62<br>(26.80 to 43.02)  | 19.39<br>(24.26 to 39.22) |
| Taiwan (Province of China)             | 27.68<br>(27.23 to 28.13)    | 19.73<br>(19.34 to 20.14)    | 15.72<br>(15.37 to 16.07)    | 11.08<br>(10.81 to 11.37)    | 8.74<br>(8.48 to 9.00)       | 8.94<br>(8.67 to 9.22)       | 8.64<br>(8.38 to 8.89)       | 6.92<br>(6.69 to 7.18)      | 5.43<br>(5.21 to 5.66)     | 4.71<br>(4.18 to 5.28)    |
| Southeast Asia                         | 144.22<br>(137.73 to 150.97) | 122.92<br>(116.71 to 129.88) | 99.42<br>(95.47 to 103.62)   | 83.32<br>(79.86 to 86.79)    | 69.50<br>(66.25 to 72.90)    | 56.67<br>(54.06 to 59.49)    | 46.75<br>(44.30 to 49.49)    | 38.62<br>(36.09 to 41.37)   | 30.46<br>(27.82 to 33.34)  | 25.28<br>(19.25 to 25.78) |
| Cambodia                               | 196.47<br>(167.10 to 227.90) | 283.35<br>(192.84 to 382.31) | 158.44<br>(142.98 to 174.25) | 138.47<br>(129.26 to 148.43) | 119.31<br>(112.15 to 127.10) | 111.91<br>(104.82 to 118.74) | 94.78<br>(88.06 to 101.52)   | 66.93<br>(60.76 to 73.65)   | 46.15<br>(40.62 to 51.97)  | 31.88<br>(26.10 to 38.62) |
| Indonesia                              | 177.53<br>(170.08 to 185.04) | 149.72<br>(142.87 to 156.58) | 125.69<br>(120.80 to 131.57) | 105.43<br>(100.79 to 110.25) | 86.67<br>(83.18 to 90.52)    | 68.19<br>(64.97 to 71.54)    | 54.09<br>(50.70 to 57.56)    | 43.59<br>(40.29 to 47.08)   | 34.60<br>(30.41 to 39.03)  | 25.24<br>(20.54 to 30.96) |
| Laos                                   | 295.17<br>(208.34 to 402.64) | 263.49<br>(196.74 to 338.87) | 236.84<br>(189.95 to 285.55) | 204.55<br>(178.05 to 232.77) | 185.47<br>(164.64 to 207.28) | 164.95<br>(147.00 to 185.71) | 140.88<br>(125.25 to 159.15) | 112.51<br>(97.74 to 128.39) | 82.56<br>(68.76 to 98.06)  | 58.21<br>(40.87 to 80.42) |
| Malaysia                               | 56.26<br>(55.58 to 56.99)    | 43.40<br>(41.58 to 45.13)    | 31.25<br>(29.25 to 33.34)    | 22.55<br>(22.17 to 22.90)    | 16.84<br>(16.53 to 17.20)    | 13.19<br>(12.95 to 13.44)    | 9.34<br>(9.12 to 9.55)       | 8.06<br>(7.87 to 8.25)      | 7.93<br>(7.58 to 8.30)     | 6.00<br>(5.22 to 6.91)    |
| Maldives                               | 398.86<br>(379.83 to 420.65) | 327.93<br>(319.85 to 335.53) | 275.94<br>(270.40 to 281.19) | 187.94<br>(183.90 to 191.94) | 110.00<br>(107.09 to 112.95) | 60.10<br>(58.08 to 62.03)    | 31.30<br>(29.90 to 32.72)    | 18.11<br>(17.13 to 19.08)   | 11.74<br>(10.94 to 12.61)  | 7.49<br>(6.63 to 8.58)    |
| Mauritius                              | 87.36<br>(85.74 to 89.00)    | 61.64<br>(60.35 to 62.99)    | 40.11<br>(39.20 to 41.13)    | 29.66<br>(28.80 to 30.54)    | 22.78<br>(22.06 to 23.49)    | 20.33<br>(19.67 to 21.01)    | 18.05<br>(17.37 to 18.70)    | 16.42<br>(15.77 to 17.11)   | 15.71<br>(15.02 to 16.51)  | 13.92<br>(12.46 to 15.59) |
| Myanmar                                | 205.88<br>(165.32 to 246.59) | 163.03<br>(133.07 to 197.12) | 135.12<br>(109.96 to 161.75) | 117.63<br>(96.74 to 140.38)  | 105.83<br>(88.59 to 125.56)  | 95.67<br>(79.38 to 116.42)   | 83.36<br>(67.80 to 100.92)   | 65.97<br>(53.31 to 81.22)   | 44.52<br>(34.75 to 56.43)  | 27.70<br>(20.83 to 37.50) |
| Philippines                            | 101.10<br>(95.71 to 107.04)  | 90.25<br>(85.50 to 95.21)    | 80.69<br>(76.24 to 85.25)    | 69.33<br>(65.39 to 73.38)    | 56.22<br>(53.19 to 59.42)    | 45.36<br>(42.50 to 48.23)    | 38.73<br>(35.86 to 41.52)    | 34.54<br>(31.42 to 37.92)   | 30.27<br>(26.82 to 34.06)  | 24.12<br>(20.37 to 28.57) |
| Sri Lanka                              | 71.07<br>(70.27 to 71.80)    | 69.70<br>(68.90 to 70.51)    | 44.77<br>(44.18 to 45.37)    | 32.60<br>(31.97 to 33.19)    | 32.73<br>(31.55 to 34.02)    | 20.86<br>(20.39 to 21.33)    | 16.92<br>(16.40 to 17.43)    | 17.56<br>(17.19 to 17.93)   | 13.39<br>(12.39 to 14.45)  | 6.79<br>(5.08 to 9.01)    |
| Seychelles                             | 71.04<br>(67.38 to 75.07)    | 49.29<br>(46.43 to 52.38)    | 31.43<br>(29.08 to 33.77)    | 23.09<br>(21.10 to 25.35)    | 18.71<br>(16.82 to 20.69)    | 14.47<br>(12.89 to 16.17)    | 13.38<br>(11.93 to 15.01)    | 13.31<br>(11.82 to 14.88)   | 12.98<br>(11.46 to 14.76)  | 11.38<br>(9.31 to 13.90)  |
| Thailand                               | 89.21<br>(84.30 to 94.16)    | 68.96<br>(64.27 to 73.96)    | 52.14<br>(47.84 to 57.01)    | 39.28<br>(35.11 to 43.71)    | 28.99<br>(24.95 to 33.57)    | 20.73<br>(17.54 to 24.54)    | 15.62<br>(13.14 to 18.71)    | 11.91<br>(10.05 to 14.00)   | 9.02<br>(7.47 to 10.76)    | 6.41<br>(5.11 to 8.02)    |
| Timor-Leste                            | 305.77<br>(247.19 to 372.87) | 276.95<br>(237.12 to 323.00) | 256.26<br>(222.09 to 291.48) | 185.84<br>(164.77 to 208.19) | 152.41<br>(134.60 to 171.39) | 1                            |                              |                             |                            |                           |

Appendix Table 11A. Under-5 mortality rates by location, both sexes combined, 1970, 1975, 1980, 1985, 1990, 1995, 2000, 2005, 2010, 2016

| Location                     | 1970                         | 1975                         | 1980                         | 1985                         | 1990                         | 1995                         | 2000                         | 2005                         | 2010                        | 2016                      |
|------------------------------|------------------------------|------------------------------|------------------------------|------------------------------|------------------------------|------------------------------|------------------------------|------------------------------|-----------------------------|---------------------------|
| Kiribati                     | 134.93<br>(101.16 to 173.20) | 106.82<br>(70.97 to 153.82)  | 92.96<br>(56.21 to 150.17)   | 91.08<br>(57.48 to 137.73)   | 82.15<br>(60.10 to 106.21)   | 71.97<br>(57.12 to 89.43)    | 65.45<br>(51.53 to 82.09)    | 62.77<br>(46.08 to 82.80)    | 58.58<br>(36.58 to 88.67)   | 48.37<br>(25.30 to 85.40) |
| Marshall Islands             | 79.14<br>(43.21 to 130.56)   | 64.81<br>(34.81 to 110.86)   | 53.53<br>(31.22 to 88.26)    | 50.36<br>(33.33 to 74.15)    | 42.66<br>(30.99 to 59.32)    | 35.38<br>(24.51 to 49.33)    | 30.28<br>(24.50 to 60.38)    | 33.01<br>(21.18 to 48.41)    | 27.41<br>(15.46 to 43.65)   | 22.15<br>(11.84 to 37.95) |
| Northern Mariana Islands     | 18.95<br>(10.38 to 32.15)    | 14.28<br>(7.51 to 26.20)     | 11.05<br>(6.09 to 19.32)     | 8.72<br>(4.48 to 14.80)      | 6.84<br>(3.59 to 11.43)      | 5.84<br>(3.23 to 9.23)       | 4.53<br>(3.38 to 5.90)       | 3.45<br>(2.55 to 4.53)       | 2.15<br>(1.51 to 3.05)      | 2.46<br>(1.35 to 4.12)    |
| Papua New Guinea             | 126.64<br>(99.58 to 155.41)  | 112.37<br>(90.27 to 136.05)  | 104.73<br>(86.73 to 124.82)  | 98.46<br>(81.12 to 117.78)   | 91.02<br>(73.30 to 111.43)   | 81.70<br>(62.74 to 103.98)   | 74.06<br>(52.28 to 101.76)   | 70.72<br>(43.94 to 105.17)   | 63.99<br>(36.61 to 99.55)   | 49.91<br>(28.27 to 83.00) |
| Samoa                        | 58.32<br>(45.42 to 72.72)    | 46.07<br>(32.94 to 62.74)    | 31.68<br>(20.08 to 49.58)    | 26.99<br>(15.05 to 46.02)    | 22.46<br>(11.67 to 40.88)    | 18.66<br>(9.19 to 35.43)     | 15.82<br>(7.60 to 28.91)     | 14.22<br>(6.83 to 26.04)     | 12.61<br>(5.99 to 23.17)    | 10.39<br>(4.84 to 20.16)  |
| Solomon Islands              | 116.69<br>(88.63 to 146.46)  | 93.35<br>(67.31 to 125.52)   | 61.21<br>(43.30 to 87.50)    | 49.84<br>(34.66 to 68.09)    | 44.75<br>(32.46 to 59.73)    | 38.81<br>(28.53 to 51.05)    | 35.93<br>(26.37 to 47.74)    | 35.83<br>(25.17 to 48.72)    | 31.75<br>(21.77 to 45.02)   | 25.50<br>(16.74 to 37.87) |
| Tonga                        | 39.77<br>(28.29 to 53.94)    | 36.15<br>(25.25 to 49.60)    | 33.76<br>(22.24 to 48.50)    | 28.75<br>(17.82 to 43.72)    | 25.52<br>(15.15 to 39.44)    | 24.68<br>(14.54 to 38.74)    | 23.63<br>(13.89 to 38.14)    | 22.32<br>(13.21 to 36.30)    | 21.44<br>(12.27 to 36.28)   | 18.58<br>(9.77 to 32.90)  |
| Vanuatu                      | 97.14<br>(67.47 to 137.44)   | 75.41<br>(49.57 to 109.32)   | 57.34<br>(37.83 to 82.80)    | 46.74<br>(33.43 to 62.69)    | 41.55<br>(31.97 to 52.64)    | 38.38<br>(29.73 to 48.80)    | 39.64<br>(30.68 to 50.54)    | 41.41<br>(31.31 to 53.70)    | 36.89<br>(25.86 to 50.54)   | 31.56<br>(20.71 to 48.59) |
| North Africa and Middle East | 204.06<br>(192.14 to 215.63) | 160.59<br>(153.01 to 168.49) | 126.60<br>(120.36 to 132.80) | 100.52<br>(94.77 to 106.92)  | 74.57<br>(71.24 to 78.30)    | 61.94<br>(59.04 to 64.82)    | 50.73<br>(47.91 to 53.67)    | 41.53<br>(38.17 to 44.95)    | 33.85<br>(30.27 to 37.53)   | 27.90<br>(23.44 to 33.63) |
| North Africa and Middle East | 204.06<br>(192.14 to 215.63) | 160.59<br>(153.01 to 168.49) | 126.60<br>(120.36 to 132.80) | 100.52<br>(94.77 to 106.92)  | 74.57<br>(71.24 to 78.30)    | 61.94<br>(59.04 to 64.82)    | 50.73<br>(47.91 to 53.67)    | 41.53<br>(38.17 to 44.95)    | 33.85<br>(30.27 to 37.53)   | 27.90<br>(23.44 to 33.63) |
| Afghanistan                  | 241.97<br>(188.11 to 300.76) | 230.76<br>(187.25 to 278.45) | 224.01<br>(186.28 to 263.21) | 204.89<br>(173.75 to 238.24) | 154.79<br>(139.39 to 170.71) | 148.08<br>(134.95 to 161.79) | 135.86<br>(122.90 to 149.04) | 112.02<br>(98.97 to 125.66)  | 86.90<br>(73.51 to 103.42)  | 66.61<br>(52.93 to 85.68) |
| Algeria                      | 175.97<br>(155.06 to 196.38) | 141.52<br>(126.30 to 157.69) | 104.22<br>(94.31 to 114.66)  | 69.36<br>(63.28 to 75.81)    | 49.31<br>(44.56 to 54.30)    | 40.51<br>(36.38 to 45.09)    | 33.13<br>(29.42 to 36.85)    | 27.61<br>(24.34 to 31.20)    | 23.63<br>(20.28 to 27.27)   | 18.21<br>(14.15 to 23.86) |
| Bahrain                      | 88.87<br>(69.44 to 110.71)   | 53.84<br>(43.95 to 65.78)    | 28.82<br>(26.48 to 31.44)    | 21.34<br>(19.84 to 22.91)    | 21.70<br>(20.25 to 23.25)    | 17.76<br>(16.35 to 19.27)    | 12.29<br>(11.27 to 13.39)    | 12.78<br>(11.60 to 13.94)    | 8.18<br>(7.43 to 9.00)      | 6.86<br>(5.35 to 8.68)    |
| Egypt                        | 244.98<br>(226.19 to 263.82) | 206.86<br>(189.54 to 223.24) | 159.77<br>(144.51 to 175.00) | 114.71<br>(104.58 to 125.74) | 83.38<br>(75.66 to 91.71)    | 61.74<br>(55.36 to 68.65)    | 44.05<br>(38.90 to 49.80)    | 35.11<br>(30.15 to 40.24)    | 28.03<br>(23.79 to 32.92)   | 19.34<br>(13.25 to 27.75) |
| Iran                         | 246.73<br>(203.63 to 292.00) | 142.38<br>(119.25 to 168.20) | 107.03<br>(90.60 to 123.09)  | 83.79<br>(70.89 to 98.22)    | 67.38<br>(57.66 to 78.97)    | 50.48<br>(42.13 to 59.63)    | 40.79<br>(32.95 to 50.10)    | 29.47<br>(22.08 to 38.69)    | 22.00<br>(16.06 to 29.67)   | 17.80<br>(12.59 to 24.53) |
| Iraq                         | 124.52<br>(105.68 to 143.29) | 102.94<br>(92.24 to 113.88)  | 81.74<br>(73.12 to 93.66)    | 72.19<br>(62.62 to 87.55)    | 52.29<br>(48.91 to 55.66)    | 50.83<br>(47.60 to 54.22)    | 42.18<br>(39.34 to 45.32)    | 40.67<br>(36.23 to 45.52)    | 33.41<br>(28.84 to 38.59)   | 28.47<br>(22.51 to 36.53) |
| Jordan                       | 103.25<br>(92.75 to 113.90)  | 81.80<br>(75.23 to 88.38)    | 57.73<br>(53.99 to 61.93)    | 41.66<br>(38.98 to 44.33)    | 34.21<br>(32.13 to 36.36)    | 30.29<br>(28.42 to 32.27)    | 26.90<br>(25.02 to 28.87)    | 23.31<br>(21.39 to 25.27)    | 19.46<br>(17.19 to 21.91)   | 17.16<br>(14.25 to 21.30) |
| Kuwait                       | 48.98<br>(46.82 to 51.11)    | 44.99<br>(43.28 to 46.66)    | 31.77<br>(30.30 to 33.26)    | 21.00<br>(20.00 to 22.11)    | 15.17<br>(13.14 to 17.38)    | 12.72<br>(11.90 to 13.54)    | 12.78<br>(11.92 to 13.67)    | 11.29<br>(10.56 to 12.12)    | 10.78<br>(10.08 to 11.50)   | 9.45<br>(7.21 to 12.19)   |
| Lebanon                      | 66.26<br>(53.26 to 82.77)    | 66.72<br>(51.20 to 84.57)    | 70.80<br>(46.87 to 102.85)   | 43.53<br>(33.57 to 55.88)    | 34.22<br>(28.32 to 41.21)    | 24.88<br>(20.19 to 30.33)    | 18.36<br>(14.14 to 23.26)    | 13.74<br>(9.83 to 18.57)     | 11.19<br>(8.24 to 14.84)    | 9.46<br>(6.98 to 12.52)   |
| Libya                        | 117.88<br>(104.52 to 132.60) | 86.67<br>(78.01 to 96.45)    | 62.33<br>(55.61 to 69.20)    | 48.11<br>(42.99 to 53.84)    | 40.18<br>(35.58 to 45.08)    | 32.19<br>(27.70 to 37.09)    | 26.69<br>(21.88 to 32.33)    | 21.32<br>(16.32 to 27.02)    | 15.71<br>(11.57 to 20.89)   | 13.88<br>(9.74 to 19.71)  |
| Morocco                      | 188.43<br>(179.86 to 197.15) | 157.93<br>(151.19 to 165.48) | 122.82<br>(116.95 to 128.82) | 93.12<br>(88.07 to 98.33)    | 70.78<br>(66.06 to 75.35)    | 56.14<br>(51.66 to 60.93)    | 45.53<br>(40.00 to 51.46)    | 36.97<br>(30.51 to 44.06)    | 29.33<br>(23.00 to 36.86)   | 21.72<br>(16.40 to 28.57) |
| Palestine                    | 81.48<br>(60.09 to 108.03)   | 73.54<br>(59.53 to 89.62)    | 61.18<br>(53.04 to 71.61)    | 43.77<br>(38.14 to 50.82)    | 40.26<br>(35.04 to 45.52)    | 29.57<br>(25.40 to 34.31)    | 27.09<br>(23.34 to 31.80)    | 25.15<br>(21.57 to 29.46)    | 21.63<br>(18.22 to 25.46)   | 16.72<br>(11.95 to 22.81) |
| Oman                         | 274.00<br>(241.28 to 309.70) | 201.54<br>(174.99 to 227.79) | 133.65<br>(113.87 to 154.24) | 79.66<br>(66.11 to 95.09)    | 48.12<br>(38.75 to 59.45)    | 28.28<br>(22.90 to 34.90)    | 15.80<br>(13.52 to 18.44)    | 7.72<br>(7.35 to 8.09)       | 8.56<br>(8.21 to 8.92)      | 8.04<br>(7.03 to 9.15)    |
| Qatar                        | 73.19<br>(50.53 to 99.87)    | 63.07<br>(47.70 to 82.03)    | 35.12<br>(24.97 to 47.24)    | 26.99<br>(20.10 to 35.10)    | 21.45<br>(15.30 to 29.47)    | 18.81<br>(13.42 to 25.76)    | 16.49<br>(11.68 to 22.45)    | 13.59<br>(9.65 to 18.83)     | 11.42<br>(8.06 to 15.52)    | 9.42<br>(6.17 to 13.84)   |
| Saudi Arabia                 | 148.78<br>(117.81 to 184.52) | 108.69<br>(89.08 to 132.70)  | 80.47<br>(66.22 to 96.45)    | 59.87<br>(48.39 to 73.30)    | 46.77<br>(36.47 to 59.25)    | 33.88<br>(25.33 to 45.16)    | 23.47<br>(16.99 to 32.08)    | 16.47<br>(11.51 to 22.83)    | 11.32<br>(7.86 to 16.35)    | 6.56<br>(4.43 to 9.84)    |
| Sudan                        | 196.64<br>(181.20 to 215.18) | 189.71<br>(174.01 to 205.92) | 176.95<br>(160.36 to 194.59) | 231.15<br>(176.96 to 288.77) | 135.93<br>(123.64 to 149.26) | 115.02<br>(103.55 to 127.01) | 94.37<br>(85.17 to 104.52)   | 78.01<br>(70.07 to 87.11)    | 75.02<br>(65.52 to 85.39)   | 61.56<br>(48.27 to 79.77) |
| Syria                        | 104.73<br>(97.45 to 112.03)  | 81.13<br>(75.18 to 86.99)    | 62.73<br>(57.56 to 68.30)    | 50.96<br>(46.30 to 56.09)    | 42.63<br>(38.74 to 46.73)    | 28.86<br>(26.84 to 30.96)    | 18.11<br>(17.82 to 18.39)    | 15.51<br>(15.33 to 15.69)    | 15.27<br>(15.00 to 15.55)   | 27.05<br>(13.67 to 46.95) |
| Tunisia                      | 159.48<br>(151.32 to 167.82) | 117.93<br>(111.69 to 124.33) | 86.01<br>(80.51 to 91.20)    | 63.09<br>(58.89 to 67.78)    | 47.89<br>(44.44 to 51.71)    | 35.95<br>(32.75 to 39.28)    | 26.60<br>(23.75 to 29.55)    | 20.79<br>(17.84 to 23.67)    | 16.79<br>(13.99 to 19.97)   | 12.54<br>(9.99 to 15.73)  |
| Turkey                       | 192.26<br>(175.44 to 208.82) | 160.98<br>(146.95 to 177.73) | 124.62<br>(111.95 to 138.65) | 92.37<br>(82.16 to 103.17)   | 70.61<br>(63.00 to 79.00)    | 55.55<br>(49.91 to 63.12)    | 40.19<br>(34.51 to 46.70)    | 28.95<br>(23.91 to 34.99)    | 22.00<br>(16.50 to 29.23)   | 15.70<br>(10.98 to 22.06) |
| United Arab Emirates         | 112.70<br>(77.87 to 155.38)  | 80.72<br>(53.03 to 120.58)   | 53.18<br>(33.95 to 77.26)    | 32.42<br>(18.24 to 53.07)    | 22.29<br>(11.93 to 36.61)    | 15.50<br>(8.02 to 27.39)     | 10.58<br>(5.67 to 17.86)     | 6.46<br>(5.10 to 8.15)       | 6.63<br>(3.81 to 10.64)     | 5.75<br>(2.99 to 10.29)   |
| Yemen                        | 316.70<br>(300.83 to 332.74) | 249.88<br>(237.23 to 262.04) | 193.23<br>(182.81 to 203.63) | 154.62<br>(146.09 to 163.91) | 129.54<br>(121.92 to 137.49) | 108.71<br>(102.02 to 115.71) | 88.43<br>(82.18 to 94.98)    | 68.68<br>(62.96 to 75.44)    | 52.07<br>(46.11 to 59.24)   | 43.61<br>(36.07 to 53.84) |
| South Asia                   | 210.83<br>(198.61 to 224.35) | 183.59<br>(173.92 to 193.22) | 158.74<br>(151.64 to 165.65) | 136.16<br>(130.69 to 141.76) | 115.65<br>(110.51 to 120.85) | 99.33<br>(94.55 to 104.27)   | 84.81<br>(80.62 to 89.41)    | 71.72<br>(66.95 to 76.77)    | 57.44<br>(52.30 to 63.26)   | 40.65<br>(35.89 to 46.62) |
| South Asia                   | 210.83<br>(198.61 to 224.35) | 183.59<br>(173.92 to 193.22) | 158.74<br>(151.64 to 165.65) | 136.16<br>(130.69 to 141.76) | 115.65<br>(110.51 to 120.85) | 99.33<br>(94.55 to 104.27)   | 84.81<br>(80.62 to 89.41)    | 71.72<br>(66.95 to 76.77)    | 57.44<br>(52.30 to 63.26)   | 40.65<br>(35.89 to 46.62) |
| Bangladesh                   | 240.57<br>(226.62 to 254.54) | 211.46<br>(202.36 to 220.73) | 192.25<br>(184.53 to 200.34) | 166.73<br>(160.34 to 173.91) | 136.81<br>(131.54 to 142.28) | 108.98<br>(104.16 to 113.53) | 86.07<br>(81.73 to 90.51)    | 67.62<br>(63.61 to 71.64)    | 50.85<br>(46.96 to 55.07)   | 33.97<br>(30.27 to 38.20) |
| Bhutan                       | 261.29<br>(225.41 to 300.19) | 231.87<br>(202.77 to 263.15) | 205.60<br>(182.87 to 231.44) | 170.45<br>(152.30 to 189.33) | 134.33<br>(121.16 to 147.95) | 107.12<br>(96.45 to 118.04)  | 85.36<br>(75.99 to 96.05)    | 64.96<br>(56.86 to 74.56)    | 48.32<br>(41.40 to 56.47)   | 32.91<br>(27.61 to 39.82) |
| India                        | 209.46<br>(195.20 to 225.77) | 181.43<br>(171.26 to 192.03) | 154.88<br>(147.14 to 162.60) | 132.08<br>(125.52 to 138.69) | 112.32<br>(106.84 to 117.85) | 96.87<br>(91.78 to 102.15)   | 82.95<br>(78.02 to 88.06)    | 70.30<br>(64.63 to 76.31)    | 55.76<br>(49.09 to 63.35)   | 39.17<br>(33.02 to 47.30) |
| Nepal                        | 246.60<br>(235.95 to 258.26) | 225.69<br>(215.04 to 235.93) | 201.08<br>(191.83 to 210.66) | 169.88<br>(161.80 to 178.15) | 136.57<br>(130.23 to 142.96) | 105.56<br>(100.15 to 111.21) | 81.04<br>(75.98 to 86.15)    | 62.67<br>(57.84 to 67.56)    | 45.99<br>(41.74 to 50.59)   | 29.35<br>(25.78 to 33.49) |
| Pakistan                     | 175.90<br>(168.09 to 183.84) | 158.50<br>(151.27 to 165.76) | 142.88<br>(136.56 to 149.18) | 126.52<br>(120.91 to 131.96) | 111.49<br>(106.58 to 116.15) | 99.87<br>(95.31 to 104.65)   | 90.75<br>(86.00 to 95.70)    | 84.46<br>(78.02 to 90.84)    | 71.01<br>(64.03 to 78.26)   | 53.45<br>(46.87 to 61.07) |
| Sub-Saharan Africa           | 231.07<br>(215.99 to 246.54) | 214.47<br>(204.48 to 224.64) | 196.99<br>(190.13 to 204.38) | 183.19<br>(177.78 to 188.62) | 171.82<br>(167.08 to 176.62) | 161.21<br>(156.67 to 165.79) | 146.32<br>(142.13 to 150.55) | 124.62<br>(120.28 to 129.23) | 102.62<br>(96.69 to 109.11) | 76.72<br>(68.94 to 85.61) |
| Southern Sub-Saharan Africa  | 126.42<br>(111.64 to 143.02) | 113.44<br>(105.78 to 121.36) | 103.15<br>(97.44 to 109.13)  | 88.68<br>(84.32 to 93.32)    | 74.21<br>(70.61 to 77.72)    | 69.72<br>(65.52 to 74.30)    | 75.74<br>(70.48 to 81.61)    | 77.97<br>(71.04 to 85.06)    | 65.66<br>(59.34 to 71.73)   | 46.45<br>(39.18 to 55.52) |
| Botswana                     | 100.29<br>(87.80 to 113.40)  | 81.05<br>(72.50 to 90.09)    | 68.27<br>(61.37 to 75.42)    | 58.04<br>(52.21 to 64.02)    | 49.58<br>(44.33 to 54.86)    | 57.86<br>(51.54 to 64.77)    | 63.55<br>(55.91 to 72.35)    | 47.12<br>(39.67 to 55.23)    | 26.78<br>(21.27 to 33.51)   | 14.92<br>(11.10 to 20.42) |
| Lesotho                      | 115.69<br>(107.71 to 123.93) | 108.45<br>(100.08 to 117.74) | 99.05<br>(90.92 to 107.55)   | 92.63<br>(84.62 to 100.66)   | 84.97<br>(78.43 to 91.67)    | 85.04<br>(78.33 to 92.04)    | 99.58<br>(91.47 to 108.08)   | 110.52<br>(100.18 to 121.98) | 89.36<br>(76.69 to 102.68)  | 66.60<br>(53.22 to 83.03) |
| Namibia                      | 103.15<br>(83.36 to 128.11)  | 97.80<br>(83.74 to 112.88)   | 97.32<br>(85.12 to 109.84)   | 82.26<br>(73.07 to 93.10)    | 71.76<br>(64.47 to 80.44)    | 59.68<br>(52.48 to 67.36)    | 63.79<br>(55.45 to 73.42)    | 65.63<br>(56.52 to 76.56)    | 55.20<br>(44.92 to 66.10)   | 36.49<br>(23.9            |

Appendix Table 11A. Under-5 mortality rates by location, both sexes combined, 1970, 1975, 1980, 1985, 1990, 1995, 2000, 2005, 2010, 2016

| Location                   | 1970                         | 1975                         | 1980                         | 1985                         | 1990                         | 1995                         | 2000                         | 2005                         | 2010                         | 2016                         |
|----------------------------|------------------------------|------------------------------|------------------------------|------------------------------|------------------------------|------------------------------|------------------------------|------------------------------|------------------------------|------------------------------|
| South Africa               | 133.37<br>(116.33 to 152.92) | 119.96<br>(110.37 to 130.11) | 109.18<br>(101.11 to 117.26) | 95.52<br>(89.45 to 101.72)   | 78.57<br>(73.17 to 83.77)    | 69.83<br>(63.73 to 76.61)    | 75.65<br>(69.05 to 83.07)    | 76.84<br>(67.24 to 86.88)    | 62.03<br>(54.04 to 69.48)    | 43.40<br>(33.17 to 55.91)    |
| Swaziland                  | 188.24<br>(138.63 to 250.28) | 149.65<br>(119.70 to 183.54) | 118.41<br>(103.74 to 135.89) | 90.96<br>(82.22 to 100.27)   | 67.67<br>(61.68 to 73.57)    | 70.14<br>(64.84 to 76.02)    | 93.69<br>(86.44 to 101.15)   | 104.53<br>(96.04 to 113.60)  | 74.24<br>(65.71 to 83.63)    | 49.23<br>(39.22 to 61.08)    |
| Zimbabwe                   | 107.99<br>(97.11 to 119.39)  | 97.87<br>(90.06 to 105.94)   | 90.19<br>(83.98 to 96.61)    | 74.09<br>(69.76 to 78.75)    | 66.53<br>(62.92 to 70.43)    | 72.62<br>(68.50 to 77.56)    | 77.38<br>(72.45 to 82.32)    | 82.75<br>(77.51 to 88.36)    | 78.02<br>(70.86 to 85.79)    | 56.51<br>(47.29 to 68.59)    |
| Western Sub-Saharan Africa | 265.53<br>(249.62 to 281.50) | 243.75<br>(230.68 to 257.83) | 221.95<br>(211.42 to 232.59) | 205.64<br>(197.13 to 213.89) | 194.59<br>(188.03 to 201.38) | 184.08<br>(178.20 to 190.35) | 169.14<br>(163.44 to 175.16) | 148.47<br>(141.83 to 155.06) | 124.94<br>(116.84 to 133.73) | 97.35<br>(87.82 to 108.66)   |
| Benin                      | 279.55<br>(265.60 to 293.03) | 248.35<br>(236.20 to 259.86) | 221.41<br>(210.59 to 232.28) | 197.94<br>(187.47 to 208.49) | 180.22<br>(170.79 to 189.87) | 161.37<br>(152.05 to 171.05) | 139.47<br>(130.00 to 148.83) | 115.60<br>(105.85 to 127.12) | 94.94<br>(84.18 to 107.84)   | 72.17<br>(60.47 to 87.45)    |
| Burkina Faso               | 307.66<br>(284.57 to 332.78) | 285.09<br>(268.05 to 302.84) | 256.30<br>(243.73 to 269.12) | 232.18<br>(221.10 to 243.40) | 211.06<br>(201.58 to 220.86) | 197.51<br>(187.69 to 206.51) | 178.14<br>(168.49 to 188.14) | 155.50<br>(144.24 to 167.04) | 134.26<br>(121.53 to 148.92) | 108.80<br>(94.70 to 126.67)  |
| Cameroon                   | 206.23<br>(195.08 to 217.99) | 185.42<br>(175.14 to 195.10) | 166.86<br>(157.71 to 175.93) | 146.49<br>(137.65 to 155.34) | 136.35<br>(127.87 to 145.05) | 139.78<br>(131.04 to 148.69) | 136.24<br>(126.49 to 147.85) | 124.91<br>(112.32 to 138.66) | 109.31<br>(93.60 to 127.48)  | 88.08<br>(70.15 to 110.07)   |
| Cape Verde                 | 182.33<br>(177.24 to 187.49) | 136.17<br>(131.39 to 141.13) | 91.86<br>(88.05 to 95.86)    | 90.66<br>(87.15 to 94.52)    | 64.68<br>(61.98 to 67.68)    | 71.85<br>(57.81 to 87.03)    | 45.03<br>(39.12 to 51.44)    | 33.07<br>(28.83 to 37.74)    | 23.16<br>(21.24 to 25.33)    | 17.05<br>(14.91 to 19.46)    |
| Chad                       | 257.31<br>(231.52 to 285.50) | 238.44<br>(219.82 to 258.41) | 228.38<br>(213.45 to 243.71) | 218.68<br>(205.95 to 231.96) | 197.58<br>(186.35 to 209.04) | 185.97<br>(174.52 to 197.26) | 182.74<br>(170.72 to 194.91) | 164.03<br>(150.28 to 177.86) | 140.28<br>(125.47 to 156.96) | 113.05<br>(97.92 to 132.28)  |
| Cote d'Ivoire              | 220.74<br>(210.67 to 230.67) | 188.76<br>(180.18 to 197.19) | 161.79<br>(154.61 to 169.67) | 152.36<br>(144.76 to 160.35) | 148.78<br>(141.18 to 156.70) | 147.66<br>(139.04 to 155.99) | 136.95<br>(128.20 to 146.49) | 125.17<br>(114.01 to 137.02) | 108.17<br>(94.78 to 121.90)  | 85.34<br>(72.54 to 100.36)   |
| The Gambia                 | 187.69<br>(162.95 to 214.29) | 166.79<br>(147.12 to 186.92) | 146.16<br>(131.69 to 161.77) | 127.01<br>(115.88 to 138.61) | 112.95<br>(103.57 to 122.19) | 98.99<br>(91.17 to 106.92)   | 85.97<br>(78.95 to 93.17)    | 72.72<br>(65.82 to 80.16)    | 60.36<br>(53.19 to 67.95)    | 48.67<br>(41.52 to 57.93)    |
| Ghana                      | 174.49<br>(165.31 to 183.77) | 158.73<br>(151.19 to 167.03) | 148.98<br>(141.91 to 156.50) | 140.17<br>(133.78 to 146.75) | 123.12<br>(117.75 to 128.73) | 110.59<br>(105.16 to 116.07) | 101.11<br>(95.96 to 106.85)  | 90.07<br>(84.63 to 95.86)    | 74.41<br>(67.39 to 81.54)    | 52.30<br>(43.97 to 63.19)    |
| Guinea                     | 311.24<br>(272.56 to 350.55) | 298.30<br>(272.47 to 326.52) | 275.07<br>(256.09 to 294.85) | 252.96<br>(237.42 to 269.12) | 226.09<br>(213.53 to 239.37) | 201.10<br>(188.04 to 214.47) | 172.77<br>(160.14 to 186.01) | 149.77<br>(135.84 to 163.97) | 126.21<br>(110.98 to 143.72) | 97.49<br>(80.65 to 119.63)   |
| Guinea-Bissau              | 307.81<br>(268.91 to 351.87) | 275.45<br>(244.23 to 310.20) | 251.89<br>(226.89 to 277.55) | 235.52<br>(216.36 to 254.97) | 209.66<br>(195.21 to 226.12) | 183.21<br>(169.88 to 196.35) | 157.85<br>(145.88 to 169.98) | 137.85<br>(124.88 to 150.96) | 101.87<br>(91.32 to 112.74)  | 71.82<br>(62.02 to 82.69)    |
| Liberia                    | 293.14<br>(267.18 to 319.34) | 264.94<br>(243.96 to 286.57) | 242.88<br>(226.40 to 260.24) | 228.70<br>(215.34 to 242.21) | 218.41<br>(207.09 to 230.24) | 214.18<br>(203.19 to 226.21) | 171.50<br>(162.63 to 180.42) | 122.12<br>(114.19 to 129.67) | 93.56<br>(85.18 to 102.71)   | 65.29<br>(56.34 to 76.73)    |
| Mali                       | 354.22<br>(331.75 to 377.76) | 326.58<br>(309.28 to 344.51) | 288.93<br>(274.50 to 303.47) | 262.66<br>(250.23 to 274.93) | 236.32<br>(224.85 to 249.02) | 214.82<br>(203.24 to 227.37) | 192.36<br>(181.47 to 205.50) | 166.02<br>(153.95 to 178.71) | 140.79<br>(126.42 to 157.24) | 117.10<br>(97.65 to 142.37)  |
| Mauritania                 | 171.84<br>(163.59 to 180.98) | 161.14<br>(153.25 to 169.14) | 142.18<br>(135.23 to 149.53) | 124.81<br>(117.66 to 131.89) | 110.27<br>(103.72 to 117.21) | 100.60<br>(93.69 to 107.45)  | 92.50<br>(85.59 to 100.04)   | 83.52<br>(75.71 to 91.27)    | 66.76<br>(58.99 to 74.86)    | 50.33<br>(43.14 to 58.79)    |
| Niger                      | 329.61<br>(303.37 to 358.29) | 331.08<br>(310.53 to 352.83) | 320.10<br>(303.38 to 337.46) | 310.13<br>(294.36 to 325.96) | 293.37<br>(278.98 to 308.46) | 267.10<br>(252.03 to 282.17) | 224.81<br>(210.29 to 239.75) | 178.70<br>(163.04 to 194.91) | 140.74<br>(124.02 to 160.04) | 108.22<br>(90.93 to 130.61)  |
| Nigeria                    | 267.13<br>(240.49 to 294.42) | 244.57<br>(224.39 to 265.94) | 223.51<br>(208.96 to 238.22) | 209.50<br>(199.09 to 220.60) | 206.73<br>(196.67 to 216.92) | 197.42<br>(187.80 to 207.59) | 183.78<br>(174.44 to 193.34) | 163.88<br>(153.52 to 173.95) | 139.22<br>(127.67 to 151.56) | 108.69<br>(93.04 to 126.20)  |
| Sao Tome and Principe      | 148.48<br>(142.07 to 154.76) | 117.84<br>(110.33 to 125.38) | 112.82<br>(106.37 to 119.82) | 123.68<br>(118.30 to 129.57) | 105.66<br>(98.07 to 113.08)  | 91.28<br>(83.97 to 99.21)    | 73.85<br>(66.92 to 80.65)    | 60.29<br>(52.64 to 68.65)    | 41.78<br>(36.63 to 47.66)    | 30.39<br>(25.59 to 36.11)    |
| Senegal                    | 269.32<br>(257.97 to 280.92) | 241.93<br>(232.50 to 251.83) | 203.98<br>(195.66 to 212.24) | 172.04<br>(165.04 to 179.27) | 145.25<br>(139.48 to 150.96) | 132.69<br>(127.07 to 138.05) | 114.93<br>(109.55 to 120.58) | 91.99<br>(86.97 to 97.00)    | 68.94<br>(63.94 to 74.37)    | 49.40<br>(43.93 to 56.26)    |
| Sierra Leone               | 304.18<br>(268.02 to 346.76) | 284.59<br>(254.53 to 316.83) | 273.67<br>(250.92 to 296.26) | 261.40<br>(244.80 to 279.08) | 244.50<br>(231.07 to 259.24) | 230.38<br>(217.56 to 242.51) | 215.15<br>(202.89 to 226.59) | 186.71<br>(174.20 to 198.90) | 154.13<br>(140.44 to 167.53) | 115.58<br>(101.48 to 131.17) |
| Togo                       | 220.16<br>(202.31 to 238.53) | 194.77<br>(181.23 to 208.13) | 171.83<br>(160.90 to 183.25) | 157.82<br>(147.94 to 168.11) | 145.11<br>(136.24 to 154.60) | 134.60<br>(125.57 to 143.59) | 122.43<br>(113.73 to 131.27) | 109.58<br>(100.02 to 119.09) | 92.37<br>(82.84 to 103.43)   | 68.99<br>(59.71 to 80.81)    |
| Eastern Sub-Saharan Africa | 219.05<br>(205.28 to 231.74) | 207.38<br>(196.64 to 217.55) | 192.58<br>(184.33 to 200.76) | 183.06<br>(176.38 to 189.57) | 168.46<br>(162.93 to 173.83) | 154.33<br>(149.32 to 159.36) | 133.31<br>(128.20 to 138.52) | 106.25<br>(101.14 to 111.79) | 83.43<br>(77.12 to 90.11)    | 59.57<br>(51.61 to 69.70)    |
| Burundi                    | 240.15<br>(207.16 to 271.39) | 233.23<br>(207.48 to 262.10) | 213.13<br>(189.44 to 236.38) | 184.31<br>(165.88 to 203.08) | 176.69<br>(159.31 to 195.67) | 174.14<br>(156.98 to 192.41) | 164.29<br>(145.58 to 182.81) | 126.72<br>(111.65 to 143.58) | 97.15<br>(80.27 to 115.06)   | 80.79<br>(66.50 to 116.66)   |
| Comoros                    | 200.94<br>(165.98 to 237.29) | 182.89<br>(160.23 to 205.77) | 164.86<br>(146.64 to 183.28) | 139.78<br>(125.49 to 155.83) | 119.75<br>(107.33 to 131.99) | 105.59<br>(94.89 to 117.27)  | 97.73<br>(86.50 to 110.18)   | 80.19<br>(69.91 to 91.97)    | 68.33<br>(57.05 to 80.84)    | 52.60<br>(39.85 to 70.56)    |
| Djibouti                   | 138.12<br>(116.78 to 161.51) | 128.24<br>(112.09 to 145.56) | 122.12<br>(109.33 to 135.61) | 120.78<br>(109.96 to 132.25) | 115.85<br>(106.22 to 125.61) | 111.37<br>(101.41 to 121.80) | 102.40<br>(91.38 to 113.64)  | 84.73<br>(73.16 to 97.93)    | 68.95<br>(57.83 to 83.11)    | 48.03<br>(39.19 to 59.77)    |
| Eritrea                    | 225.88<br>(197.02 to 257.24) | 203.69<br>(183.28 to 224.45) | 186.71<br>(169.66 to 202.60) | 169.96<br>(156.44 to 185.45) | 148.71<br>(135.80 to 161.87) | 114.93<br>(103.85 to 127.08) | 92.83<br>(80.84 to 105.52)   | 77.82<br>(65.10 to 91.87)    | 67.60<br>(54.70 to 82.83)    | 51.19<br>(40.51 to 65.79)    |
| Ethiopia                   | 235.76<br>(214.67 to 257.86) | 235.36<br>(218.56 to 252.64) | 220.04<br>(206.41 to 233.18) | 203.01<br>(192.04 to 214.93) | 188.38<br>(178.49 to 198.69) | 164.96<br>(156.21 to 174.05) | 140.09<br>(131.61 to 148.90) | 106.14<br>(97.49 to 114.74)  | 74.33<br>(66.19 to 83.93)    | 43.37<br>(36.98 to 51.66)    |
| Kenya                      | 143.02<br>(135.31 to 151.22) | 126.24<br>(119.21 to 133.90) | 110.18<br>(103.08 to 117.37) | 100.46<br>(94.84 to 107.17)  | 95.42<br>(90.12 to 101.34)   | 97.74<br>(91.73 to 103.65)   | 90.26<br>(84.24 to 96.63)    | 74.12<br>(68.33 to 80.87)    | 56.63<br>(50.55 to 62.98)    | 43.44<br>(36.88 to 51.17)    |
| Madagascar                 | 174.21<br>(153.37 to 197.76) | 166.89<br>(148.58 to 187.91) | 165.86<br>(149.22 to 182.45) | 170.98<br>(153.74 to 188.20) | 149.28<br>(136.43 to 162.55) | 135.48<br>(122.82 to 148.72) | 117.27<br>(104.80 to 129.19) | 101.39<br>(88.78 to 113.98)  | 96.37<br>(82.07 to 110.99)   | 79.73<br>(63.38 to 101.85)   |
| Malawi                     | 329.90<br>(298.65 to 364.77) | 293.79<br>(267.30 to 320.48) | 257.61<br>(238.20 to 278.36) | 240.83<br>(224.03 to 259.24) | 223.37<br>(207.69 to 239.51) | 193.77<br>(179.96 to 209.19) | 165.15<br>(151.73 to 178.82) | 123.92<br>(112.76 to 134.50) | 100.30<br>(89.16 to 112.49)  | 68.99<br>(55.33 to 87.40)    |
| Mozambique                 | 254.02<br>(224.00 to 283.15) | 237.68<br>(216.47 to 258.31) | 228.83<br>(214.63 to 243.43) | 254.76<br>(237.15 to 271.60) | 213.40<br>(203.75 to 223.29) | 193.64<br>(184.86 to 202.56) | 161.49<br>(153.40 to 170.19) | 129.92<br>(121.26 to 138.36) | 103.72<br>(93.77 to 114.26)  | 76.15<br>(65.91 to 89.23)    |
| Rwanda                     | 247.89<br>(226.93 to 269.12) | 242.85<br>(223.77 to 263.08) | 210.75<br>(194.43 to 227.73) | 172.85<br>(159.33 to 187.55) | 168.96<br>(156.47 to 182.09) | 185.05<br>(168.32 to 202.25) | 156.24<br>(142.40 to 170.22) | 105.94<br>(95.19 to 116.38)  | 66.73<br>(58.31 to 75.58)    | 49.22<br>(39.57 to 62.28)    |
| Somalia                    | 197.01<br>(163.70 to 233.74) | 226.06<br>(189.56 to 265.45) | 189.13<br>(164.66 to 215.59) | 194.29<br>(174.02 to 215.19) | 178.33<br>(163.13 to 194.56) | 168.54<br>(154.11 to 184.17) | 155.57<br>(141.21 to 170.50) | 133.05<br>(117.00 to 149.88) | 146.29<br>(123.35 to 173.44) | 97.20<br>(81.27 to 117.78)   |
| South Sudan                | 256.10<br>(195.18 to 332.17) | 244.37<br>(192.56 to 306.39) | 233.45<br>(192.98 to 276.63) | 221.89<br>(194.36 to 251.54) | 200.08<br>(180.77 to 221.76) | 170.82<br>(154.88 to 186.21) | 143.59<br>(131.25 to 155.96) | 123.62<br>(110.72 to 137.01) | 107.62<br>(91.54 to 125.11)  | 93.50<br>(73.44 to 117.42)   |
| Tanzania                   | 209.89<br>(194.41 to 224.63) | 191.33<br>(181.10 to 201.72) | 176.29<br>(168.39 to 185.19) | 165.79<br>(158.83 to 172.74) | 154.88<br>(148.76 to 161.48) | 143.43<br>(137.01 to 149.82) | 123.81<br>(117.83 to 130.04) | 100.03<br>(93.84 to 106.57)  | 76.95<br>(69.94 to 84.23)    | 55.72<br>(48.23 to 65.29)    |
| Uganda                     | 199.96<br>(184.24 to 215.35) | 191.00<br>(179.56 to 202.70) | 192.22<br>(181.62 to 202.68) | 182.85<br>(174.40 to 191.81) | 170.31<br>(163.26 to 177.21) | 156.74<br>(150.35 to 163.59) | 134.51<br>(128.33 to 140.70) | 112.53<br>(106.40 to 118.70) | 90.24<br>(83.18 to 97.53)    | 62.43<br>(55.00 to 71.80)    |

Appendix Table 11A. Under-5 mortality rates by location, both sexes combined, 1970, 1975, 1980, 1985, 1990, 1995, 2000, 2005, 2010, 2016

| Location                         | 1970                         | 1975                         | 1980                         | 1985                         | 1990                         | 1995                         | 2000                         | 2005                         | 2010                         | 2016                        |
|----------------------------------|------------------------------|------------------------------|------------------------------|------------------------------|------------------------------|------------------------------|------------------------------|------------------------------|------------------------------|-----------------------------|
| Zambia                           | 184.85<br>(163.58 to 208.94) | 163.93<br>(147.19 to 180.88) | 161.38<br>(146.64 to 177.87) | 167.49<br>(153.73 to 182.53) | 169.97<br>(156.76 to 183.69) | 161.06<br>(147.58 to 174.90) | 142.33<br>(128.60 to 155.19) | 113.28<br>(101.44 to 125.31) | 84.20<br>(72.60 to 97.04)    | 59.75<br>(47.74 to 73.91)   |
| Central Sub-Saharan Africa       | 210.50<br>(169.61 to 254.65) | 197.44<br>(164.18 to 232.97) | 183.57<br>(161.29 to 207.56) | 165.13<br>(149.96 to 182.35) | 166.75<br>(153.31 to 180.56) | 160.49<br>(146.89 to 175.44) | 150.29<br>(135.55 to 166.22) | 126.84<br>(114.58 to 139.63) | 105.05<br>(90.53 to 119.79)  | 74.90<br>(56.49 to 97.42)   |
| Angola                           | 205.00<br>(157.46 to 260.68) | 197.68<br>(154.66 to 243.56) | 192.70<br>(157.45 to 230.47) | 185.04<br>(160.26 to 210.72) | 188.17<br>(166.20 to 212.70) | 163.99<br>(144.24 to 184.46) | 151.22<br>(132.34 to 172.10) | 121.98<br>(106.93 to 139.82) | 92.93<br>(77.84 to 111.23)   | 54.45<br>(40.40 to 71.78)   |
| Central African Republic         | 187.66<br>(155.59 to 222.99) | 189.69<br>(159.53 to 222.22) | 179.65<br>(154.26 to 210.81) | 176.11<br>(151.84 to 202.81) | 177.19<br>(153.84 to 203.75) | 176.48<br>(150.43 to 205.99) | 179.30<br>(152.17 to 210.10) | 170.18<br>(140.83 to 203.84) | 155.44<br>(123.68 to 191.23) | 130.55<br>(97.21 to 176.90) |
| Congo                            | 174.64<br>(133.79 to 224.15) | 151.01<br>(114.00 to 194.69) | 126.30<br>(105.08 to 149.85) | 101.95<br>(89.64 to 114.27)  | 95.44<br>(86.38 to 106.08)   | 99.54<br>(88.88 to 111.46)   | 103.42<br>(91.96 to 115.72)  | 87.26<br>(77.27 to 97.94)    | 68.13<br>(56.79 to 81.87)    | 52.85<br>(37.78 to 74.94)   |
| Democratic Republic of the Congo | 215.95<br>(165.97 to 270.08) | 201.41<br>(162.02 to 247.20) | 185.55<br>(155.01 to 217.25) | 162.46<br>(142.38 to 185.01) | 164.11<br>(144.81 to 184.05) | 163.12<br>(143.25 to 185.65) | 152.43<br>(131.94 to 176.34) | 129.44<br>(112.15 to 149.05) | 109.46<br>(90.77 to 130.40)  | 80.48<br>(58.50 to 107.73)  |
| Equatorial Guinea                | 238.70<br>(178.67 to 309.35) | 217.01<br>(173.65 to 264.27) | 188.57<br>(155.96 to 222.76) | 182.15<br>(154.49 to 211.71) | 194.29<br>(166.46 to 226.91) | 203.30<br>(172.30 to 238.15) | 146.81<br>(118.81 to 177.06) | 112.19<br>(85.44 to 143.94)  | 87.48<br>(62.63 to 120.07)   | 57.03<br>(38.65 to 84.95)   |
| Gabon                            | 171.16<br>(143.60 to 201.79) | 140.12<br>(121.59 to 159.66) | 113.82<br>(102.04 to 126.49) | 95.65<br>(87.24 to 104.07)   | 85.07<br>(77.89 to 92.57)    | 75.38<br>(69.03 to 81.97)    | 69.88<br>(63.50 to 76.46)    | 65.43<br>(58.20 to 73.06)    | 55.85<br>(47.90 to 65.50)    | 43.66<br>(35.51 to 54.61)   |

Appendix Table 11B. Under-5 mortality rates by location, males, 1970, 1975, 1980, 1985, 1990, 1995, 2000, 2005, 2010, 2016

| Location                  | 1970                         | 1975                         | 1980                         | 1985                         | 1990                         | 1995                         | 2000                         | 2005                         | 2010                        | 2016                      |
|---------------------------|------------------------------|------------------------------|------------------------------|------------------------------|------------------------------|------------------------------|------------------------------|------------------------------|-----------------------------|---------------------------|
| Global                    | 149.38<br>(140.47 to 158.96) | 131.24<br>(124.73 to 137.95) | 114.77<br>(109.59 to 120.15) | 100.48<br>(96.16 to 104.87)  | 87.93<br>(84.19 to 91.64)    | 80.18<br>(76.93 to 83.47)    | 71.71<br>(68.56 to 75.09)    | 61.94<br>(58.53 to 65.43)    | 51.80<br>(47.59 to 56.35)   | 40.37<br>(35.58 to 46.09) |
| High SDI                  | 92.53<br>(86.31 to 99.65)    | 73.35<br>(69.41 to 77.49)    | 60.13<br>(56.43 to 64.01)    | 48.24<br>(45.69 to 51.00)    | 40.31<br>(38.14 to 42.74)    | 33.94<br>(31.92 to 35.94)    | 26.90<br>(25.00 to 28.82)    | 20.64<br>(18.90 to 22.54)    | 15.87<br>(14.22 to 17.67)   | 12.46<br>(10.66 to 14.61) |
| High-middle SDI           | 28.87<br>(28.16 to 29.67)    | 22.81<br>(22.14 to 23.54)    | 17.37<br>(16.84 to 17.99)    | 13.67<br>(13.33 to 14.06)    | 11.40<br>(11.18 to 11.67)    | 9.06<br>(8.87 to 9.26)       | 7.58<br>(7.49 to 7.67)       | 6.85<br>(6.76 to 6.93)       | 5.94<br>(5.84 to 6.03)      | 5.39<br>(4.98 to 5.87)    |
| Middle SDI                | 213.50<br>(199.23 to 229.17) | 186.97<br>(175.96 to 198.41) | 162.68<br>(154.75 to 171.06) | 142.13<br>(135.64 to 148.28) | 122.76<br>(117.61 to 128.34) | 109.58<br>(104.75 to 114.53) | 95.95<br>(91.37 to 100.64)   | 82.11<br>(77.69 to 86.55)    | 67.85<br>(62.37 to 73.72)   | 51.39<br>(45.66 to 58.36) |
| Low-middle SDI            | 247.89<br>(225.71 to 271.67) | 231.91<br>(217.70 to 246.41) | 213.81<br>(203.92 to 224.17) | 197.45<br>(189.05 to 206.20) | 180.60<br>(173.09 to 188.44) | 166.38<br>(159.34 to 173.49) | 146.65<br>(139.92 to 153.73) | 122.27<br>(115.29 to 129.67) | 101.00<br>(91.96 to 111.12) | 74.42<br>(63.50 to 87.25) |
| Low SDI                   | 139.56<br>(130.59 to 149.06) | 115.31<br>(108.62 to 121.89) | 94.54<br>(89.58 to 100.09)   | 77.10<br>(72.70 to 81.58)    | 62.62<br>(58.84 to 66.69)    | 51.68<br>(48.91 to 54.54)    | 42.56<br>(40.37 to 45.07)    | 34.61<br>(32.30 to 36.83)    | 27.24<br>(24.88 to 29.85)   | 20.77<br>(17.79 to 24.22) |
| High-income               | 32.51<br>(31.81 to 33.26)    | 26.01<br>(25.37 to 26.74)    | 18.89<br>(18.38 to 19.51)    | 14.64<br>(14.30 to 15.02)    | 12.44<br>(12.22 to 12.71)    | 9.85<br>(9.68 to 10.05)      | 8.31<br>(8.23 to 8.40)       | 7.44<br>(7.35 to 7.52)       | 6.50<br>(6.40 to 6.59)      | 5.91<br>(5.50 to 6.36)    |
| High-income North America | 26.71<br>(26.44 to 26.98)    | 21.27<br>(21.08 to 21.47)    | 16.79<br>(16.63 to 16.97)    | 13.91<br>(13.76 to 14.05)    | 12.10<br>(11.97 to 12.23)    | 9.92<br>(9.81 to 10.02)      | 8.89<br>(8.77 to 9.00)       | 8.69<br>(8.58 to 8.80)       | 7.77<br>(7.65 to 7.87)      | 7.34<br>(7.05 to 7.64)    |
| Canada                    | 25.52<br>(24.95 to 26.09)    | 19.21<br>(18.76 to 19.66)    | 13.98<br>(13.63 to 14.35)    | 10.69<br>(10.41 to 10.96)    | 9.19<br>(8.93 to 9.46)       | 7.97<br>(7.73 to 8.19)       | 6.73<br>(6.47 to 6.99)       | 6.59<br>(6.38 to 6.81)       | 6.15<br>(5.95 to 6.35)      | 5.77<br>(5.41 to 6.16)    |
| Greenland                 | 52.43<br>(48.13 to 56.70)    | 44.63<br>(40.64 to 48.59)    | 43.78<br>(39.55 to 48.32)    | 41.91<br>(37.76 to 46.58)    | 42.23<br>(37.25 to 47.28)    | 29.46<br>(26.08 to 33.25)    | 21.54<br>(18.92 to 24.38)    | 19.61<br>(17.14 to 22.79)    | 17.19<br>(14.62 to 19.99)   | 14.84<br>(11.64 to 18.80) |
| United States             | 26.93<br>(26.56 to 27.30)    | 21.41<br>(21.12 to 21.72)    | 16.98<br>(16.72 to 17.23)    | 14.21<br>(13.92 to 14.46)    | 12.30<br>(12.10 to 12.50)    | 10.01<br>(9.84 to 10.17)     | 9.02<br>(8.87 to 9.17)       | 8.86<br>(8.71 to 9.01)       | 7.89<br>(7.74 to 8.04)      | 7.47<br>(7.17 to 7.77)    |
| Australasia               | 24.08<br>(23.64 to 24.50)    | 20.10<br>(19.71 to 20.50)    | 15.27<br>(14.92 to 15.61)    | 13.44<br>(13.17 to 13.75)    | 10.86<br>(10.58 to 11.13)    | 8.19<br>(7.96 to 8.42)       | 7.30<br>(7.11 to 7.50)       | 6.63<br>(6.43 to 6.84)       | 5.68<br>(5.50 to 5.87)      | 4.55<br>(4.15 to 5.01)    |
| Australia                 | 24.18<br>(23.66 to 24.66)    | 19.78<br>(19.33 to 20.24)    | 14.70<br>(14.31 to 15.08)    | 13.01<br>(12.69 to 13.34)    | 10.53<br>(10.21 to 10.83)    | 7.85<br>(7.61 to 8.10)       | 7.05<br>(6.83 to 7.29)       | 6.47<br>(6.25 to 6.69)       | 5.40<br>(5.22 to 5.59)      | 4.26<br>(3.88 to 4.68)    |
| New Zealand               | 23.66<br>(22.92 to 24.40)    | 21.47<br>(20.82 to 22.08)    | 17.78<br>(17.18 to 18.36)    | 15.48<br>(14.94 to 16.05)    | 12.32<br>(11.87 to 12.75)    | 9.68<br>(9.32 to 10.07)      | 8.41<br>(7.99 to 8.84)       | 7.36<br>(7.02 to 7.74)       | 6.99<br>(6.69 to 7.29)      | 6.10<br>(5.56 to 6.71)    |
| High-income Asia Pacific  | 32.92<br>(30.10 to 36.34)    | 23.51<br>(20.87 to 26.50)    | 16.52<br>(14.21 to 19.35)    | 11.51<br>(9.97 to 13.30)     | 9.00<br>(7.89 to 10.53)      | 7.31<br>(6.57 to 8.21)       | 5.76<br>(5.65 to 5.88)       | 4.61<br>(4.49 to 4.73)       | 3.71<br>(3.60 to 3.82)      | 3.13<br>(2.83 to 3.47)    |
| Brunei                    | 74.94<br>(70.80 to 79.24)    | 47.41<br>(44.48 to 50.40)    | 26.33<br>(24.65 to 28.11)    | 16.92<br>(15.79 to 18.03)    | 12.86<br>(11.98 to 13.83)    | 10.85<br>(10.07 to 11.76)    | 9.82<br>(9.04 to 10.63)      | 9.71<br>(8.97 to 10.44)      | 8.63<br>(8.83 to 10.50)     | 8.33<br>(8.78 to 11.95)   |
| Japan                     | 19.53<br>(19.25 to 19.82)    | 15.34<br>(15.10 to 15.59)    | 11.28<br>(11.08 to 11.48)    | 8.18<br>(8.02 to 8.35)       | 6.93<br>(6.78 to 7.09)       | 6.46<br>(6.25 to 6.64)       | 4.88<br>(4.76 to 5.01)       | 4.04<br>(3.94 to 4.15)       | 3.37<br>(3.27 to 3.49)      | 2.80<br>(2.50 to 3.14)    |
| Singapore                 | 30.58<br>(29.67 to 31.56)    | 21.18<br>(20.39 to 21.99)    | 16.67<br>(16.03 to 17.31)    | 11.94<br>(11.41 to 12.52)    | 8.37<br>(7.97 to 8.75)       | 5.65<br>(5.35 to 5.97)       | 4.25<br>(4.02 to 4.51)       | 3.37<br>(3.15 to 3.63)       | 3.02<br>(2.81 to 3.25)      | 2.55<br>(2.27 to 2.86)    |
| South Korea               | 60.04<br>(51.57 to 70.21)    | 41.34<br>(33.14 to 50.41)    | 26.35<br>(19.87 to 34.45)    | 18.49<br>(13.76 to 23.96)    | 12.65<br>(9.49 to 17.13)     | 8.78<br>(6.80 to 11.23)      | 7.49<br>(7.27 to 7.72)       | 5.91<br>(5.70 to 6.14)       | 4.36<br>(4.17 to 4.55)      | 3.74<br>(2.94 to 4.69)    |
| Western Europe            | 25.04<br>(28.98 to 29.52)    | 14.80<br>(22.96 to 23.41)    | 8.59<br>(16.54 to 16.84)     | 7.59<br>(12.51 to 12.80)     | 6.69<br>(10.32 to 10.57)     | 4.73<br>(7.55 to 7.77)       | 3.42<br>(6.21 to 6.41)       | 3.56<br>(5.23 to 5.40)       | 3.40<br>(4.58 to 4.75)      | 3.54<br>(3.54 to 4.64)    |
| Andorra                   | 33.37<br>(18.95 to 32.77)    | 27.21<br>(11.15 to 19.26)    | 19.13<br>(6.50 to 11.25)     | 14.99<br>(5.82 to 9.69)      | 10.89<br>(5.11 to 8.65)      | 7.58<br>(3.58 to 6.06)       | 6.40<br>(2.61 to 4.37)       | 5.49<br>(2.73 to 4.64)       | 5.08<br>(2.61 to 4.38)      | 3.77<br>(2.66 to 4.75)    |
| Austria                   | 27.81<br>(32.27 to 34.44)    | 21.89<br>(26.23 to 28.22)    | 16.83<br>(18.37 to 19.93)    | 13.41<br>(14.27 to 15.70)    | 11.40<br>(10.39 to 11.46)    | 8.68<br>(7.19 to 8.03)       | 6.61<br>(6.00 to 6.78)       | 5.57<br>(5.12 to 5.89)       | 5.06<br>(4.75 to 5.43)      | 4.44<br>(3.08 to 4.59)    |
| Belgium                   | 45.39<br>(27.38 to 28.27)    | 34.90<br>(21.48 to 22.30)    | 23.33<br>(16.51 to 17.17)    | 17.19<br>(13.12 to 13.71)    | 14.30<br>(11.10 to 11.68)    | 11.45<br>(8.44 to 8.90)      | 8.72<br>(6.39 to 6.83)       | 6.67<br>(5.40 to 5.76)       | 6.67<br>(4.90 to 5.25)      | 6.33<br>(4.04 to 4.89)    |
| Cyprus                    | 19.97<br>(40.24 to 50.63)    | 14.66<br>(32.58 to 36.88)    | 11.80<br>(22.12 to 24.51)    | 10.81<br>(15.99 to 18.31)    | 10.18<br>(13.00 to 15.50)    | 7.39<br>(10.58 to 12.27)     | 6.16<br>(7.93 to 9.48)       | 5.41<br>(6.06 to 7.32)       | 4.39<br>(4.29 to 5.36)      | 4.36<br>(3.05 to 4.24)    |
| Denmark                   | 18.63<br>(19.19 to 20.76)    | 14.40<br>(14.01 to 15.31)    | 10.02<br>(11.20 to 12.41)    | 8.24<br>(10.21 to 11.43)     | 7.62<br>(9.62 to 10.77)      | 5.55<br>(6.88 to 7.89)       | 4.39<br>(5.75 to 6.58)       | 3.32<br>(5.00 to 5.81)       | 3.32<br>(4.02 to 4.78)      | 2.41<br>(3.55 to 5.32)    |
| Finland                   | 20.71<br>(17.74 to 19.65)    | 18.62<br>(13.57 to 15.29)    | 14.14<br>(9.37 to 10.71)     | 11.34<br>(7.67 to 8.81)      | 10.08<br>(7.08 to 8.23)      | 8.86<br>(5.12 to 6.01)       | 6.02<br>(4.31 to 5.16)       | 4.88<br>(3.99 to 4.83)       | 4.62<br>(3.01 to 3.67)      | 4.21<br>(1.92 to 3.02)    |
| France                    | 29.13<br>(20.35 to 21.06)    | 24.49<br>(18.30 to 18.94)    | 17.16<br>(13.85 to 14.45)    | 12.36<br>(11.10 to 11.59)    | 10.24<br>(9.85 to 10.32)     | 7.24<br>(6.68 to 7.06)       | 5.92<br>(5.84 to 6.21)       | 5.20<br>(4.72 to 5.04)       | 4.62<br>(4.45 to 4.78)      | 3.94<br>(3.46 to 5.12)    |
| Germany                   | 36.22<br>(28.71 to 29.53)    | 28.88<br>(24.07 to 24.92)    | 22.07<br>(16.85 to 17.50)    | 16.83<br>(12.10 to 12.64)    | 11.66<br>(10.00 to 10.49)    | 9.35<br>(6.99 to 7.52)       | 8.84<br>(5.75 to 6.10)       | 8.47<br>(5.04 to 5.38)       | 4.32<br>(4.46 to 4.77)      | 4.18<br>(3.19 to 4.94)    |
| Greece                    | 18.22<br>(35.49 to 37.01)    | 15.19<br>(28.21 to 29.51)    | 11.02<br>(21.51 to 22.64)    | 8.83<br>(16.37 to 17.31)     | 7.30<br>(11.29 to 12.05)     | 6.47<br>(9.03 to 9.69)       | 5.45<br>(6.57 to 7.10)       | 5.07<br>(4.66 to 5.07)       | 4.57<br>(4.14 to 4.52)      | 4.21<br>(3.78 to 4.63)    |
| Iceland                   | 25.00<br>(16.80 to 19.82)    | 22.48<br>(13.79 to 16.80)    | 15.64<br>(9.99 to 12.11)     | 11.88<br>(7.93 to 9.80)      | 10.37<br>(6.59 to 8.13)      | 8.14<br>(5.75 to 7.26)       | 7.97<br>(3.93 to 5.05)       | 5.41<br>(3.08 to 4.01)       | 4.25<br>(2.47 to 3.31)      | 4.25<br>(1.97 to 2.93)    |
| Ireland                   | 31.55<br>(24.05 to 29.98)    | 30.76<br>(21.61 to 23.36)    | 18.36<br>(14.94 to 16.35)    | 14.73<br>(11.21 to 12.52)    | 12.77<br>(9.85 to 10.92)     | 9.57<br>(7.66 to 8.63)       | 7.92<br>(7.51 to 8.46)       | 5.98<br>(5.05 to 5.77)       | 4.92<br>(4.27 to 4.83)      | 4.82<br>(3.59 to 5.03)    |
| Israel                    | 35.86<br>(29.57 to 33.81)    | 25.77<br>(29.85 to 31.74)    | 18.16<br>(17.69 to 19.04)    | 13.11<br>(14.13 to 15.31)    | 10.17<br>(12.27 to 13.26)    | 7.95<br>(9.17 to 9.98)       | 6.71<br>(7.27 to 7.92)       | 4.27<br>(5.72 to 6.24)       | 4.48<br>(4.69 to 5.15)      | 4.48<br>(3.33 to 4.39)    |
| Italy                     | 27.82<br>(35.24 to 36.46)    | 19.77<br>(25.33 to 26.21)    | 15.60<br>(17.76 to 18.57)    | 12.95<br>(12.79 to 13.42)    | 10.25<br>(9.90 to 10.47)     | 6.63<br>(7.04 to 8.22)       | 5.19<br>(5.46 to 5.98)       | 3.76<br>(4.44 to 4.80)       | 3.17<br>(4.12 to 4.44)      | 3.32<br>(2.68 to 4.48)    |
| Luxembourg                | 31.30<br>(25.60 to 30.28)    | 23.25<br>(18.05 to 21.62)    | 18.75<br>(13.97 to 17.27)    | 15.77<br>(11.74 to 14.14)    | 11.90<br>(9.19 to 11.30)     | 10.81<br>(5.88 to 7.40)      | 8.65<br>(4.51 to 5.94)       | 8.00<br>(3.30 to 4.29)       | 7.85<br>(2.70 to 3.65)      | 6.67<br>(1.82 to 2.91)    |
| Malta                     | 18.31<br>(29.23 to 33.72)    | 15.49<br>(21.10 to 25.35)    | 12.21<br>(17.41 to 20.04)    | 11.01<br>(14.52 to 17.10)    | 9.74<br>(10.89 to 12.84)     | 7.82<br>(9.83 to 11.77)      | 7.00<br>(7.79 to 9.53)       | 6.12<br>(7.16 to 8.99)       | 4.86<br>(6.91 to 8.93)      | 4.18<br>(5.46 to 8.11)    |
| Netherlands               | 19.10<br>(17.81 to 18.83)    | 15.70<br>(15.03 to 15.99)    | 11.72<br>(11.78 to 12.62)    | 11.72<br>(10.61 to 11.42)    | 9.78<br>(9.37 to 10.09)      | 6.25<br>(5.83 to 8.17)       | 5.55<br>(6.71 to 7.32)       | 4.50<br>(7.15 to 6.40)       | 3.63<br>(4.63 to 5.08)      | 3.02<br>(3.73 to 4.68)    |
| Norway                    | 69.65<br>(68.52 to 70.82)    | 47.61<br>(46.65 to 48.54)    | 32.24<br>(31.61 to 32.94)    | 22.99<br>(22.56 to 23.39)    | 15.79<br>(15.48 to 16.08)    | 10.85<br>(10.60 to 11.12)    | 7.77<br>(7.53 to 8.02)       | 5.48<br>(5.29 to 5.70)       | 4.14<br>(3.99 to 4.29)      | 3.44<br>(3.16 to 3.74)    |
| Spain                     | 35.11<br>(34.43 to 35.78)    | 24.32<br>(23.84 to 24.79)    | 16.96<br>(16.58 to 17.32)    | 12.39<br>(12.05 to 12.74)    | 10.37<br>(10.05 to 10.70)    | 7.59<br>(7.33 to 7.84)       | 5.73<br>(5.50 to 5.97)       | 5.02<br>(4.83 to 5.22)       | 4.10<br>(3.94 to 4.28)      | 3.50<br>(2.95 to 4.14)    |
| Sweden                    | 15.06<br>(11.31 to 19.98)    | 11.74<br>(8.92 to 16.06)     | 9.03<br>(8.74 to 11.13)      | 7.88<br>(7.07 to 8.93)       | 7.71<br>(6.97 to 8.44)       | 5.27<br>(4.86 to 6.19)       | 4.39<br>(3.85 to 4.94)       | 3.72<br>(3.23 to 4.12)       | 3.47<br>(2.47 to 3.26)      | 2.94<br>(2.06 to 3.10)    |
| Stockholm                 | 14.86<br>(13.93 to 15.76)    | 11.57<br>(10.74 to 12.39)    | 8.85<br>(8.32 to 9.40)       | 7.87<br>(7.38 to 8.35)       | 7.72<br>(7.29 to 8.17)       | 5.24<br>(4.91 to 5.55)       | 4.40<br>(4.05 to 4.74)       | 3.78<br>(3.51 to 4.08)       | 3.67<br>(3.36 to 3.99)      | 3.07<br>(2.49 to 3.70)    |
| Sweden except Stockholm   | 20.93<br>(20.24 to 21.61)    | 15.67<br>(15.09 to 16.30)    | 11.86<br>(11.36 to 12.42)    | 9.95<br>(9.50 to 10.41)      | 6.99<br>(9.04 to 9.93)       | 6.46<br>(6.65 to 7.38)       | 5.50<br>(6.09 to 6.87)       | 4.80<br>(5.18 to 5.82)       | 4.80<br>(4.50 to 5.15)      | 4.31<br>(3.50 to 5.29)    |
| Switzerland               | 24.28<br>(23.85 to 24.72)    | 20.68<br>(20.31 to 21.07)    | 16.21<br>(15.89 to 16.56)    | 12.74<br>(12.48 to 13.00)    | 10.69<br>(10.45 to 10.92)    | 8.14<br>(7.95 to 8.35)       | 7.32<br>(7.10 to 7.55)       | 6.50<br>(6.36 to 6.65)       | 5.62<br>(5.47 to 5.77)      | 5.03<br>(4.54 to 5.57)    |
| United Kingdom            | 23.38<br>(22.63 to 24.09)    | 19.91<br>(19.37 to 20.46)    | 15.94<br>(15.57 to 16.34)    | 12.55<br>(12.31 to 12.80)    | 10.66<br>(10.44 to 10.88)    | 8.07<br>(7.90 to 8.25)       | 7.32<br>(7.07 to 7.56)       | 6.48<br>(6.33 to 6.64)       | 5.63<br>(5.48 to 5.78)      | 5.04<br>(4.66 to 5.44)    |
| England                   | 23.20<br>(21.56 to 24.83)    | 19.71<br>(18.62 to 20.78)    | 15.75<br>(14.66 to 16.77)    | 12.05<br>(11.42 to 12.70)    | 10.84<br>(10.29 to 11.43)    | 7.99<br>(7.55 to 8.43)       | 7.35<br>(6.86 to 7.88)       | 6.63<br>(6.26 to 7.01)       | 5.77<br>(5.43 to 6.11)      | 5.71<br>(5.12 to 6.34)    |
| East Midlands             | 21.32<br>(18.06 to 24.86)    | 17.67<br>(15.49 to 19.88)    | 13.99<br>(12.69 to 15.40)    | 11.07<br>(10.53 to 11.62)    | 8.42<br>(7.95 to 8.90)       | 7.00<br>(6.60 to 7.47)       | 5.96<br>(5.59 to 6.35)       | 5.48<br>(5.16 to 5.83)       | 4.93<br>(4.60 to 5.30)      | 4.30<br>(3.59 to 5.07)    |
| Greater London            | 24.73<br>(22.79 to 26.62)    | 21.29<br>(20.37 to 22.19)    | 17.21<br>(16.64 to 17.79)    | 13.30<br>(12.87 to 13.75)    | 11.43<br>(11.05 to 11.82)    | 9.01<br>(8.68 to 9.36)       | 8.07<br>(7.70 to 8.47)       | 6.66<br>(6.40 to 6.94)       | 5.85<br>(5.56 to 6.14)      | 4.43<br>(3.91 to 4.97)    |
| North East England        | 22.65<br>(20.19 to 25.24)    | 19.32<br>(18.09 to 20.55)    |                              |                              |                              |                              |                              |                              |                             |                           |

Appendix Table 11B. Under-5 mortality rates by location, males, 1970, 1975, 1980, 1985, 1990, 1995, 2000, 2005, 2010, 2016

| Location                                         | 1970                         | 1975                         | 1980                         | 1985                         | 1990                        | 1995                       | 2000                       | 2005                      | 2010                      | 2016                      |
|--------------------------------------------------|------------------------------|------------------------------|------------------------------|------------------------------|-----------------------------|----------------------------|----------------------------|---------------------------|---------------------------|---------------------------|
| Northern Ireland                                 | 30-32<br>(28.64 to 32.19)    | 24-20<br>(22.74 to 25.71)    | 17-91<br>(16.65 to 19.16)    | 13-63<br>(12.61 to 14.84)    | 10-69<br>(9.79 to 11.69)    | 9-22<br>(8.36 to 10.11)    | 7-28<br>(6.47 to 8.13)     | 7-33<br>(6.67 to 8.11)    | 6-60<br>(5.93 to 7.37)    | 5-32<br>(3.57 to 7.64)    |
| Scotland                                         | 25-83<br>(24.95 to 26.65)    | 22-71<br>(21.86 to 23.58)    | 16-24<br>(15.55 to 16.94)    | 13-15<br>(12.48 to 13.80)    | 10-79<br>(10.25 to 11.38)   | 8-40<br>(7.90 to 8.91)     | 7-27<br>(6.78 to 7.73)     | 6-61<br>(6.14 to 7.06)    | 5-64<br>(4.69 to 5.38)    | 4-54<br>(3.51 to 5.80)    |
| Wales                                            | 25-56<br>(20.06 to 32.58)    | 22-11<br>(17.09 to 27.93)    | 17-83<br>(15.78 to 20.09)    | 13-30<br>(12.46 to 14.16)    | 9-96<br>(9.32 to 10.62)     | 8-12<br>(7.55 to 8.69)     | 7-15<br>(6.62 to 7.73)     | 5-88<br>(5.44 to 6.36)    | 5-26<br>(4.88 to 5.69)    | 4-88<br>(3.96 to 5.94)    |
| Southern Latin America                           | 90-83<br>(89.94 to 91.69)    | 72-18<br>(71.20 to 73.13)    | 47-27<br>(46.82 to 47.70)    | 35-68<br>(35.38 to 36.00)    | 31-47<br>(31.17 to 31.75)   | 25-91<br>(25.70 to 26.12)  | 19-63<br>(19.41 to 19.83)  | 16-03<br>(15.86 to 16.20) | 13-92<br>(13.74 to 14.10) | 12-10<br>(11.37 to 12.91) |
| Argentina                                        | 88-14<br>(87.02 to 89.27)    | 71-09<br>(69.67 to 72.60)    | 48-39<br>(47.95 to 48.82)    | 38-64<br>(38.29 to 39.01)    | 35-95<br>(35.60 to 36.26)   | 30-96<br>(30.66 to 31.27)  | 22-60<br>(22.35 to 22.84)  | 17-96<br>(17.77 to 18.16) | 15-40<br>(15.22 to 15.57) | 13-45<br>(12.80 to 14.15) |
| Chile                                            | 103-12<br>(101.28 to 104.80) | 76-84<br>(75.55 to 78.04)    | 43-45<br>(42.69 to 44.21)    | 27-43<br>(26.91 to 27.93)    | 22-33<br>(21.91 to 22.76)   | 15-42<br>(15.09 to 15.74)  | 12-06<br>(11.82 to 12.31)  | 10-33<br>(10.08 to 10.58) | 9-84<br>(9.57 to 10.15)   | 8-49<br>(7.84 to 9.20)    |
| Uruguay                                          | 60-04<br>(58.32 to 61.83)    | 64-02<br>(62.23 to 65.86)    | 51-24<br>(49.57 to 52.99)    | 40-69<br>(39.07 to 42.31)    | 28-79<br>(27.62 to 30.04)   | 24-57<br>(23.50 to 25.56)  | 18-03<br>(17.15 to 18.89)  | 15-99<br>(15.20 to 16.86) | 12-23<br>(10.87 to 13.93) | 9-91<br>(7.61 to 12.84)   |
| Central Europe, Eastern Europe, and Central Asia | 57-25<br>(51.00 to 64.53)    | 49-09<br>(45.89 to 52.73)    | 44-19<br>(41.99 to 46.72)    | 40-12<br>(38.44 to 41.87)    | 35-84<br>(34.30 to 37.47)   | 36-75<br>(34.82 to 38.89)  | 31-06<br>(28.96 to 33.32)  | 24-45<br>(22.09 to 27.09) | 18-73<br>(16.44 to 21.50) | 15-19<br>(12.17 to 19.30) |
| Eastern Europe                                   | 36-84<br>(32.60 to 42.42)    | 35-96<br>(32.74 to 40.16)    | 33-43<br>(31.43 to 35.82)    | 29-29<br>(27.99 to 30.76)    | 24-30<br>(23.17 to 25.55)   | 25-45<br>(24.13 to 26.87)  | 22-37<br>(21.01 to 23.96)  | 17-70<br>(14.75 to 16.88) | 11-13<br>(10.37 to 12.03) | 9-36<br>(8.44 to 10.62)   |
| Belarus                                          | 40-93<br>(32.86 to 50.19)    | 34-29<br>(28.05 to 41.50)    | 30-03<br>(24.75 to 35.84)    | 27-30<br>(22.78 to 32.70)    | 23-57<br>(19.60 to 28.21)   | 21-45<br>(17.73 to 25.62)  | 18-43<br>(15.11 to 22.14)  | 13-38<br>(10.77 to 16.32) | 9-10<br>(7.11 to 11.67)   | 6-30<br>(4.76 to 8.50)    |
| Estonia                                          | 25-16<br>(23.60 to 26.76)    | 25-76<br>(24.20 to 27.40)    | 26-32<br>(24.69 to 27.93)    | 23-42<br>(21.85 to 25.07)    | 19-45<br>(18.18 to 20.84)   | 21-13<br>(19.53 to 22.60)  | 12-88<br>(11.72 to 14.10)  | 8-23<br>(7.29 to 9.31)    | 5-32<br>(4.67 to 6.13)    | 3-42<br>(2.59 to 4.46)    |
| Latvia                                           | 25-61<br>(24.10 to 27.10)    | 29-87<br>(28.10 to 31.49)    | 24-78<br>(23.28 to 26.30)    | 19-81<br>(18.57 to 21.10)    | 19-94<br>(18.69 to 21.31)   | 22-88<br>(21.13 to 24.74)  | 14-35<br>(12.87 to 16.02)  | 10-87<br>(9.85 to 11.98)  | 8-57<br>(7.63 to 9.58)    | 5-23<br>(3.38 to 7.70)    |
| Lithuania                                        | 26-05<br>(24.95 to 27.16)    | 26-92<br>(25.80 to 28.12)    | 21-68<br>(20.68 to 22.70)    | 21-26<br>(20.28 to 22.18)    | 15-35<br>(14.64 to 16.13)   | 17-61<br>(16.78 to 18.47)  | 12-58<br>(11.88 to 13.29)  | 9-78<br>(9.07 to 10.47)   | 6-53<br>(6.07 to 7.08)    | 5-09<br>(4.36 to 5.91)    |
| Moldova                                          | 78-41<br>(52.66 to 112.50)   | 68-27<br>(46.77 to 94.74)    | 61-86<br>(49.11 to 76.88)    | 48-28<br>(39.48 to 58.17)    | 36-15<br>(29.39 to 43.51)   | 38-97<br>(32.13 to 47.25)  | 34-94<br>(28.04 to 42.79)  | 18-94<br>(14.45 to 24.11) | 18-16<br>(13.56 to 23.53) | 13-18<br>(8.68 to 18.93)  |
| Russia                                           | 31-78<br>(31.52 to 32.02)    | 33-52<br>(33.24 to 33.77)    | 32-01<br>(31.67 to 32.33)    | 29-69<br>(29.31 to 30.03)    | 24-54<br>(24.35 to 24.73)   | 26-08<br>(25.77 to 26.38)  | 22-34<br>(21.92 to 22.82)  | 15-49<br>(15.33 to 15.63) | 10-76<br>(10.64 to 10.87) | 9-36<br>(9.03 to 9.74)    |
| Ukraine                                          | 46-41<br>(29.83 to 67.19)    | 40-71<br>(27.90 to 56.67)    | 36-36<br>(27.53 to 46.67)    | 27-49<br>(22.27 to 34.01)    | 23-44<br>(18.91 to 28.52)   | 23-90<br>(19.25 to 29.58)  | 23-67<br>(18.28 to 30.12)  | 17-47<br>(13.11 to 22.92) | 12-79<br>(9.40 to 16.92)  | 10-32<br>(6.38 to 16.02)  |
| Central Europe                                   | 48-55<br>(45.06 to 52.70)    | 37-70<br>(35.39 to 40.40)    | 31-65<br>(30.15 to 33.29)    | 27-10<br>(26.16 to 28.14)    | 24-13<br>(23.46 to 24.85)   | 20-39<br>(19.88 to 20.93)  | 15-16<br>(14.64 to 15.72)  | 11-73<br>(11.36 to 12.14) | 8-73<br>(8.46 to 9.01)    | 6-85<br>(5.58 to 8.53)    |
| Albania                                          | 106-99<br>(69.86 to 161.46)  | 78-76<br>(52.18 to 112.44)   | 63-04<br>(47.33 to 82.51)    | 55-69<br>(46.83 to 66.03)    | 42-62<br>(36.14 to 49.90)   | 38-58<br>(32.61 to 45.28)  | 29-22<br>(24.22 to 35.36)  | 23-86<br>(18.50 to 30.15) | 19-06<br>(13.49 to 26.47) | 15-22<br>(9.72 to 23.01)  |
| Bosnia and Herzegovina                           | 59-00<br>(42.50 to 81.79)    | 47-19<br>(35.76 to 61.75)    | 36-72<br>(29.96 to 44.60)    | 27-94<br>(26.70 to 29.13)    | 27-94<br>(18.13 to 19.58)   | 22-65<br>(20.08 to 25.30)  | 12-45<br>(11.80 to 13.11)  | 9-81<br>(9.21 to 10.41)   | 7-67<br>(7.21 to 8.13)    | 5-82<br>(5.01 to 6.74)    |
| Bulgaria                                         | 35-89<br>(34.47 to 36.59)    | 30-36<br>(29.44 to 31.31)    | 27-00<br>(26.22 to 27.92)    | 21-05<br>(20.28 to 21.87)    | 20-49<br>(19.73 to 21.33)   | 20-33<br>(19.45 to 21.27)  | 18-37<br>(17.44 to 19.34)  | 14-40<br>(13.57 to 15.21) | 12-62<br>(11.86 to 13.43) | 9-32<br>(6.32 to 13.50)   |
| Croatia                                          | 40-31<br>(27.98 to 57.04)    | 32-08<br>(23.43 to 42.15)    | 25-72<br>(20.52 to 31.65)    | 20-57<br>(19.54 to 21.70)    | 14-21<br>(13.55 to 14.90)   | 12-98<br>(11.99 to 14.07)  | 10-15<br>(9.54 to 10.76)   | 7-62<br>(7.14 to 8.15)    | 6-08<br>(5.69 to 6.52)    | 4-96<br>(4.17 to 5.85)    |
| Czech Republic                                   | 44-16<br>(42.77 to 45.50)    | 40-85<br>(39.66 to 42.10)    | 27-94<br>(27.02 to 28.81)    | 24-91<br>(23.93 to 25.90)    | 18-78<br>(17.99 to 19.61)   | 13-91<br>(13.28 to 14.59)  | 11-60<br>(11.03 to 12.26)  | 8-21<br>(7.71 to 8.74)    | 6-34<br>(5.91 to 6.75)    | 6-19<br>(4.84 to 7.85)    |
| Hungary                                          | 71-41<br>(40.13 to 115.79)   | 58-76<br>(33.13 to 95.24)    | 55-21<br>(38.69 to 77.39)    | 44-69<br>(32.14 to 60.14)    | 37-79<br>(36.10 to 39.47)   | 25-74<br>(24.32 to 27.18)  | 15-73<br>(14.66 to 16.85)  | 10-65<br>(13.97 to 16.36) | 10-98<br>(9.76 to 11.73)  | 10-98<br>(6.98 to 16.65)  |
| Macedonia                                        | 35-89<br>(23.04 to 54.14)    | 30-47<br>(19.78 to 48.06)    | 25-37<br>(16.70 to 37.69)    | 21-09<br>(14.17 to 30.34)    | 17-05<br>(12.67 to 22.45)   | 17-24<br>(15.35 to 19.24)  | 18-91<br>(17.22 to 20.73)  | 12-18<br>(11.11 to 13.35) | 7-71<br>(6.81 to 8.62)    | 5-72<br>(4.38 to 7.38)    |
| Montenegro                                       | 43-49<br>(42.63 to 44.32)    | 32-56<br>(31.90 to 33.17)    | 28-06<br>(27.54 to 28.61)    | 23-60<br>(23.08 to 24.07)    | 20-81<br>(20.31 to 21.28)   | 17-50<br>(16.98 to 18.01)  | 10-49<br>(10.09 to 10.88)  | 8-18<br>(7.86 to 8.49)    | 6-36<br>(6.10 to 6.64)    | 4-86<br>(3.14 to 7.30)    |
| Poland                                           | 60-38<br>(59.49 to 61.34)    | 44-42<br>(43.66 to 45.17)    | 37-79<br>(37.11 to 38.41)    | 34-51<br>(33.82 to 35.16)    | 31-51<br>(36.70 to 38.07)   | 28-54<br>(27.86 to 29.23)  | 25-79<br>(25.08 to 26.47)  | 20-27<br>(19.70 to 20.93) | 14-83<br>(14.34 to 15.37) | 10-58<br>(9.07 to 12.34)  |
| Romania                                          | 48-20<br>(31.77 to 69.01)    | 39-86<br>(27.35 to 56.98)    | 34-65<br>(23.93 to 48.11)    | 30-31<br>(21.80 to 40.63)    | 22-83<br>(17.59 to 29.31)   | 23-60<br>(22.72 to 24.49)  | 17-02<br>(14.09 to 20.45)  | 13-98<br>(11.54 to 16.86) | 11-60<br>(11.04 to 12.19) | 8-90<br>(7.42 to 10.50)   |
| Serbia                                           | 34-43<br>(33.02 to 35.72)    | 31-46<br>(30.13 to 32.87)    | 26-98<br>(25.90 to 28.11)    | 21-05<br>(20.12 to 22.03)    | 15-96<br>(15.18 to 16.77)   | 11-02<br>(13.13 to 14.83)  | 9-59<br>(10.29 to 11.81)   | 7-27<br>(8.89 to 10.35)   | 6-62<br>(6.63 to 7.90)    | 6-62<br>(4.84 to 8.94)    |
| Slovakia                                         | 32-47<br>(23.30 to 44.19)    | 25-71<br>(20.01 to 32.69)    | 20-74<br>(18.19 to 23.52)    | 17-30<br>(16.38 to 18.29)    | 11-65<br>(10.86 to 12.40)   | 8-11<br>(7.54 to 8.72)     | 6-10<br>(5.57 to 6.63)     | 4-87<br>(4.45 to 5.32)    | 3-57<br>(3.25 to 3.94)    | 2-62<br>(2.23 to 3.05)    |
| Slovenia                                         | 111-48<br>(93.02 to 132.63)  | 93-67<br>(84.13 to 104.22)   | 82-14<br>(76.46 to 88.98)    | 74-37<br>(69.61 to 78.99)    | 64-48<br>(59.88 to 69.44)   | 55-14<br>(59.69 to 70.36)  | 44-36<br>(49.75 to 61.02)  | 35-54<br>(38.72 to 52.98) | 33-33<br>(28.56 to 43.07) | 27-48<br>(19.94 to 37.38) |
| Central Asia                                     | 112-44<br>(81.93 to 151.13)  | 87-48<br>(68.85 to 109.58)   | 73-01<br>(61.14 to 86.63)    | 60-74<br>(52.77 to 69.97)    | 49-83<br>(42.82 to 57.59)   | 47-35<br>(40.75 to 54.48)  | 33-95<br>(28.90 to 40.15)  | 26-36<br>(21.08 to 32.37) | 18-92<br>(14.78 to 23.82) | 13-51<br>(10.00 to 17.94) |
| Armenia                                          | 130-23<br>(93.91 to 174.01)  | 99-77<br>(72.40 to 134.50)   | 92-74<br>(74.21 to 114.86)   | 89-89<br>(75.12 to 104.94)   | 83-08<br>(69.77 to 97.66)   | 81-82<br>(69.18 to 96.25)  | 67-73<br>(56.90 to 80.71)  | 54-92<br>(44.77 to 66.12) | 41-63<br>(29.32 to 56.61) | 32-61<br>(22.41 to 45.80) |
| Azerbaijan                                       | 109-15<br>(82.76 to 140.41)  | 83-58<br>(67.59 to 102.21)   | 64-22<br>(55.19 to 74.86)    | 53-13<br>(47.14 to 59.22)    | 47-66<br>(42.63 to 53.22)   | 47-51<br>(42.30 to 53.52)  | 42-11<br>(36.72 to 48.13)  | 30-94<br>(25.43 to 37.08) | 23-11<br>(17.99 to 29.36) | 17-27<br>(12.62 to 23.11) |
| Georgia                                          | 60-80<br>(51.04 to 85.19)    | 60-80<br>(51.29 to 70.09)    | 53-59<br>(46.39 to 61.06)    | 46-53<br>(41.36 to 52.57)    | 41-69<br>(36.75 to 46.26)   | 45-28<br>(39.25 to 51.79)  | 41-30<br>(34.44 to 48.71)  | 32-90<br>(26.36 to 40.40) | 22-84<br>(18.16 to 28.21) | 15-26<br>(11.08 to 20.56) |
| Kazakhstan                                       | 146-11<br>(124.67 to 170.17) | 120-52<br>(107.75 to 133.73) | 102-54<br>(93.43 to 112.05)  | 88-15<br>(81.33 to 95.09)    | 72-53<br>(67.70 to 77.56)   | 61-95<br>(57.76 to 66.35)  | 54-88<br>(50.48 to 59.33)  | 46-28<br>(42.07 to 50.63) | 39-22<br>(35.11 to 43.47) | 32-24<br>(26.81 to 38.51) |
| Kyrgyzstan                                       | 161-31<br>(134.47 to 190.56) | 145-32<br>(123.82 to 170.19) | 133-38<br>(116.86 to 151.01) | 118-29<br>(108.19 to 129.67) | 99-45<br>(91.27 to 108.04)  | 82-05<br>(74.52 to 90.17)  | 63-49<br>(56.99 to 70.21)  | 45-97<br>(40.34 to 51.46) | 33-56<br>(28.69 to 39.04) | 24-32<br>(18.88 to 30.85) |
| Mongolia                                         | 188-12<br>(140.80 to 244.24) | 167-68<br>(136.87 to 204.53) | 134-23<br>(113.84 to 155.53) | 122-98<br>(102.22 to 144.93) | 104-93<br>(90.73 to 120.80) | 99-48<br>(85.39 to 113.80) | 79-63<br>(67.32 to 92.52)  | 60-89<br>(50.63 to 72.35) | 48-79<br>(38.58 to 60.44) | 42-14<br>(30.18 to 57.30) |
| Tajikistan                                       | 193-83<br>(130.62 to 272.28) | 160-66<br>(115.46 to 214.54) | 133-66<br>(106.67 to 166.31) | 114-78<br>(96.23 to 135.46)  | 101-42<br>(83.81 to 119.94) | 98-09<br>(81.44 to 119.30) | 91-44<br>(71.59 to 115.36) | 75-22<br>(55.47 to 96.79) | 56-78<br>(40.49 to 76.51) | 42-15<br>(28.66 to 60.45) |
| Turkmenistan                                     | 98-92<br>(74.62 to 130.29)   | 81-18<br>(66.64 to 97.08)    | 73-45<br>(62.27 to 84.85)    | 66-50<br>(57.27 to 76.73)    | 53-72<br>(46.57 to 61.69)   | 55-92<br>(48.84 to 64.60)  | 47-07<br>(39.38 to 56.34)  | 41-87<br>(31.17 to 54.81) | 34-31<br>(24.92 to 45.92) | 26-48<br>(18.87 to 36.31) |
| Uzbekistan                                       | 126-66<br>(118.03 to 134.95) | 106-64<br>(101.04 to 113.27) | 85-99<br>(81.18 to 91.29)    | 70-38<br>(66.79 to 74.22)    | 56-08<br>(53.41 to 59.14)   | 45-33<br>(42.47 to 48.50)  | 36-04<br>(33.18 to 38.88)  | 30-31<br>(27.90 to 32.98) | 28-05<br>(24.11 to 32.80) | 20-60<br>(16.17 to 26.29) |
| Latin America and Caribbean                      | 111-44<br>(106.90 to 115.94) | 93-11<br>(89.20 to 97.39)    | 72-95<br>(69.21 to 76.68)    | 58-13<br>(55.02 to 61.13)    | 46-59<br>(43.86 to 49.38)   | 38-71<br>(36.17 to 41.53)  | 31-43<br>(28.79 to 33.99)  | 26-28<br>(23.84 to 28.72) | 22-26<br>(19.58 to 25.10) | 18-46<br>(15.38 to 22.24) |
| Central Latin America                            | 98-15<br>(91.98 to 104.60)   | 79-22<br>(73.69 to 84.73)    | 57-60<br>(53.34 to 62.28)    | 47-29<br>(43.46 to 51.47)    | 36-96<br>(33.76 to 40.22)   | 33-49<br>(30.54 to 36.75)  | 29-21<br>(26.10 to 32.41)  | 26-13<br>(23.11 to 29.56) | 22-06<br>(18.81 to 26.03) | 17-15<br>(13.89 to 21.14) |
| Colombia                                         | 74-60<br>(69.90 to 79.54)    | 52-88<br>(48.35 to 57.35)    | 35-64<br>(31.82 to 39.59)    | 26-78<br>(23.71 to 30.09)    | 19-16<br>(19.20 to 25.32)   | 17-08<br>(16.24 to 22.63)  | 15-34<br>(14.27 to 20.64)  | 13-77<br>(12.73 to 18.45) | 11-62<br>(11.19 to 16.70) | 11-62<br>(8.82 to 15.22)  |
| Costa Rica                                       | 158-20<br>(140.26 to 176.16) | 126-70<br>(113.54 to 140.54) | 102-43<br>(93.09 to 112.22)  | 80-40<br>(73.20 to 88.13)    | 57-63<br>(51.98 to 64.35)   | 43-14<br>(38.33 to 48.21)  | 32-17<br>(27.94 to 37.05)  | 22-80<br>(19.25 to 26.78) | 17-45<br>(14.09 to 21.15) | 13-17<br>(10.40 to 16.60) |
| El Salvador                                      | 182-73<br>(171.89 to 195.16) | 153-99<br>(145.04 to 162.82) | 127-77                       |                              |                             |                            |                            |                           |                           |                           |

Appendix Table 11B. Under-5 mortality rates by location, males, 1970, 1975, 1980, 1985, 1990, 1995, 2000, 2005, 2010, 2016

| Location                               | 1970                         | 1975                         | 1980                         | 1985                         | 1990                         | 1995                         | 2000                         | 2005                         | 2010                        | 2016                      |
|----------------------------------------|------------------------------|------------------------------|------------------------------|------------------------------|------------------------------|------------------------------|------------------------------|------------------------------|-----------------------------|---------------------------|
| Venezuela                              | 72.35<br>(71.71 to 73.00)    | 64.72<br>(64.18 to 65.29)    | 45.25<br>(44.84 to 45.68)    | 35.92<br>(35.58 to 36.24)    | 31.65<br>(31.36 to 31.94)    | 30.70<br>(30.37 to 31.03)    | 23.74<br>(23.49 to 23.98)    | 20.28<br>(20.07 to 20.49)    | 18.81<br>(18.56 to 19.05)   | 18.65<br>(17.62 to 19.78) |
| Andean Latin America                   | 196.74<br>(183.53 to 211.57) | 155.49<br>(148.98 to 162.24) | 127.79<br>(120.14 to 135.65) | 104.05<br>(98.79 to 109.14)  | 81.68<br>(78.35 to 85.39)    | 63.02<br>(60.24 to 65.92)    | 47.49<br>(45.24 to 49.84)    | 29.69<br>(35.22 to 40.67)    | 22.62<br>(26.15 to 33.60)   | 22.62<br>(17.75 to 28.67) |
| Bolivia                                | 237.42<br>(220.93 to 254.08) | 199.59<br>(187.83 to 210.78) | 166.10<br>(155.09 to 177.46) | 140.99<br>(131.26 to 150.46) | 119.18<br>(112.04 to 126.41) | 96.72<br>(90.18 to 103.73)   | 76.69<br>(69.88 to 84.06)    | 62.46<br>(54.05 to 71.34)    | 49.63<br>(40.70 to 59.97)   | 37.14<br>(28.24 to 48.40) |
| Ecuador                                | 129.08<br>(122.05 to 136.15) | 104.04<br>(98.86 to 109.52)  | 80.01<br>(75.84 to 84.80)    | 63.20<br>(59.25 to 67.14)    | 51.10<br>(47.98 to 54.57)    | 42.16<br>(39.42 to 44.93)    | 35.36<br>(32.60 to 38.35)    | 29.44<br>(26.26 to 32.75)    | 23.72<br>(20.68 to 27.14)   | 18.94<br>(15.81 to 22.70) |
| Peru                                   | 211.61<br>(189.76 to 236.08) | 162.34<br>(152.75 to 172.78) | 136.36<br>(126.93 to 145.47) | 110.39<br>(103.68 to 117.22) | 82.87<br>(78.14 to 88.04)    | 60.50<br>(56.78 to 64.67)    | 41.32<br>(38.59 to 44.00)    | 31.59<br>(29.38 to 33.86)    | 24.45<br>(22.15 to 26.73)   | 18.74<br>(14.65 to 23.82) |
| Caribbean                              | 122.23<br>(113.72 to 132.26) | 109.52<br>(102.16 to 116.94) | 100.87<br>(92.78 to 109.74)  | 85.94<br>(79.15 to 93.82)    | 73.63<br>(67.13 to 80.57)    | 64.42<br>(58.95 to 71.02)    | 53.39<br>(47.87 to 59.17)    | 51.41<br>(44.58 to 58.50)    | 77.21<br>(49.95 to 111.94)  | 36.10<br>(25.40 to 50.63) |
| Antigua and Barbuda                    | 36.56<br>(25.27 to 49.57)    | 30.38<br>(21.37 to 41.42)    | 23.68<br>(16.60 to 32.93)    | 16.88<br>(12.05 to 23.07)    | 16.73<br>(11.92 to 22.63)    | 19.38<br>(14.14 to 25.85)    | 19.15<br>(14.00 to 26.01)    | 16.98<br>(12.48 to 23.23)    | 14.66<br>(10.49 to 21.00)   | 13.17<br>(8.50 to 19.62)  |
| The Bahamas                            | 53.07<br>(34.81 to 76.64)    | 42.90<br>(28.53 to 61.85)    | 35.53<br>(23.00 to 52.29)    | 29.92<br>(18.61 to 44.32)    | 24.11<br>(14.74 to 36.85)    | 19.26<br>(12.53 to 27.95)    | 15.10<br>(9.81 to 21.81)     | 14.99<br>(9.82 to 21.58)     | 12.92<br>(8.50 to 19.32)    | 11.66<br>(6.18 to 21.64)  |
| Barbados                               | 50.73<br>(35.48 to 71.49)    | 38.29<br>(26.11 to 54.03)    | 28.54<br>(18.68 to 42.80)    | 23.90<br>(14.75 to 36.47)    | 20.61<br>(11.75 to 32.45)    | 18.52<br>(10.99 to 29.21)    | 17.76<br>(10.69 to 27.41)    | 17.28<br>(11.39 to 24.80)    | 16.68<br>(11.09 to 24.92)   | 15.17<br>(7.46 to 28.42)  |
| Belize                                 | 108.00<br>(84.80 to 132.66)  | 84.04<br>(68.44 to 102.36)   | 67.72<br>(54.96 to 80.42)    | 52.42<br>(43.10 to 62.83)    | 43.59<br>(35.88 to 52.38)    | 32.86<br>(25.72 to 41.35)    | 30.67<br>(23.57 to 38.55)    | 24.24<br>(17.85 to 32.95)    | 19.16<br>(13.53 to 26.26)   | 16.62<br>(9.28 to 27.98)  |
| Bermuda                                | 29.80<br>(24.69 to 36.16)    | 23.96<br>(18.89 to 29.70)    | 22.23<br>(17.58 to 27.87)    | 15.06<br>(11.60 to 19.58)    | 12.96<br>(9.94 to 16.58)     | 10.29<br>(7.64 to 13.86)     | 4.80<br>(3.18 to 7.21)       | 6.97<br>(5.10 to 9.29)       | 5.38<br>(3.81 to 7.38)      | 4.43<br>(2.75 to 6.82)    |
| Cuba                                   | 44.19<br>(43.55 to 44.89)    | 33.22<br>(32.81 to 33.62)    | 26.59<br>(26.03 to 27.21)    | 21.28<br>(20.61 to 22.05)    | 15.74<br>(15.31 to 16.20)    | 12.73<br>(12.48 to 12.97)    | 9.76<br>(9.55 to 9.96)       | 8.05<br>(7.87 to 8.23)       | 6.80<br>(6.63 to 6.97)      | 5.94<br>(5.56 to 6.39)    |
| Dominica                               | 58.79<br>(42.66 to 77.66)    | 37.00<br>(26.41 to 49.97)    | 24.31<br>(16.85 to 32.98)    | 19.41<br>(13.04 to 27.31)    | 18.03<br>(12.60 to 25.08)    | 18.22<br>(12.87 to 24.75)    | 19.15<br>(13.64 to 26.12)    | 20.77<br>(15.25 to 28.35)    | 23.53<br>(16.63 to 33.70)   | 24.87<br>(14.79 to 40.32) |
| Dominican Republic                     | 135.66<br>(122.55 to 149.06) | 114.46<br>(103.27 to 125.74) | 93.33<br>(84.83 to 102.46)   | 78.18<br>(71.45 to 85.79)    | 65.44<br>(59.50 to 71.66)    | 51.14<br>(46.32 to 56.39)    | 41.33<br>(37.27 to 45.84)    | 40.80<br>(36.46 to 45.52)    | 36.35<br>(31.70 to 41.75)   | 30.73<br>(24.27 to 38.71) |
| Grenada                                | 55.57<br>(34.00 to 84.26)    | 47.30<br>(27.08 to 74.01)    | 37.33<br>(18.68 to 67.73)    | 28.18<br>(13.94 to 52.54)    | 20.93<br>(11.81 to 35.50)    | 17.25<br>(10.48 to 25.64)    | 16.52<br>(10.50 to 23.86)    | 15.38<br>(9.67 to 23.27)     | 15.70<br>(10.32 to 23.19)   | 16.77<br>(9.02 to 30.79)  |
| Guayana                                | 96.94<br>(89.75 to 104.74)   | 85.06<br>(77.26 to 92.96)    | 71.32<br>(64.25 to 78.93)    | 63.75<br>(57.96 to 69.70)    | 57.68<br>(53.73 to 62.08)    | 49.91<br>(45.91 to 53.71)    | 43.60<br>(40.06 to 47.70)    | 41.51<br>(37.65 to 45.67)    | 36.86<br>(31.98 to 42.27)   | 27.98<br>(22.10 to 35.31) |
| Haiti                                  | 293.27<br>(260.77 to 328.43) | 250.94<br>(226.62 to 275.66) | 217.93<br>(194.36 to 245.30) | 183.29<br>(164.10 to 206.17) | 156.93<br>(138.06 to 176.06) | 133.06<br>(117.73 to 151.90) | 105.14<br>(90.31 to 120.50)  | 93.56<br>(77.10 to 111.42)   | 161.71<br>(93.26 to 248.88) | 59.01<br>(39.66 to 85.04) |
| Jamaica                                | 62.15<br>(52.57 to 72.66)    | 51.86<br>(43.08 to 62.99)    | 43.86<br>(33.65 to 55.37)    | 37.11<br>(28.22 to 47.16)    | 32.93<br>(24.35 to 43.05)    | 29.00<br>(20.72 to 39.16)    | 26.37<br>(18.52 to 35.87)    | 23.61<br>(15.57 to 35.97)    | 23.25<br>(14.45 to 37.11)   | 21.44<br>(12.67 to 34.68) |
| Puerto Rico                            | 33.20<br>(32.42 to 33.96)    | 25.10<br>(24.50 to 25.70)    | 22.27<br>(21.77 to 22.87)    | 19.44<br>(18.59 to 20.40)    | 17.47<br>(16.83 to 18.06)    | 16.67<br>(16.14 to 17.23)    | 13.90<br>(13.44 to 14.35)    | 11.69<br>(11.20 to 12.17)    | 9.87<br>(9.47 to 10.34)     | 7.27<br>(6.31 to 8.38)    |
| Saint Lucia                            | 67.27<br>(38.20 to 113.35)   | 47.84<br>(30.36 to 72.34)    | 34.01<br>(20.73 to 51.88)    | 27.32<br>(15.41 to 43.99)    | 23.47<br>(13.53 to 39.29)    | 21.09<br>(13.05 to 32.90)    | 19.78<br>(12.43 to 29.82)    | 21.54<br>(13.29 to 32.51)    | 21.72<br>(14.27 to 32.00)   | 19.01<br>(9.54 to 34.78)  |
| Saint Vincent and the Grenadines       | 89.31<br>(59.55 to 124.75)   | 67.12<br>(43.87 to 96.71)    | 48.44<br>(31.86 to 68.34)    | 34.77<br>(22.12 to 51.06)    | 29.62<br>(19.40 to 43.48)    | 27.37<br>(18.53 to 38.07)    | 26.27<br>(18.61 to 35.68)    | 24.43<br>(17.47 to 33.32)    | 22.22<br>(15.66 to 31.30)   | 19.21<br>(11.99 to 31.04) |
| Suriname                               | 74.61<br>(61.33 to 90.89)    | 69.87<br>(58.94 to 82.29)    | 64.68<br>(55.07 to 75.29)    | 59.25<br>(50.90 to 68.19)    | 54.65<br>(47.78 to 62.80)    | 51.36<br>(44.38 to 59.10)    | 49.15<br>(41.34 to 57.76)    | 45.84<br>(37.05 to 55.21)    | 42.01<br>(33.30 to 52.01)   | 37.57<br>(28.44 to 49.24) |
| Trinidad and Tobago                    | 58.42<br>(53.13 to 63.68)    | 52.99<br>(48.01 to 58.57)    | 42.39<br>(36.97 to 48.25)    | 34.19<br>(28.90 to 39.88)    | 31.49<br>(25.85 to 37.75)    | 30.59<br>(24.71 to 37.25)    | 30.63<br>(24.77 to 37.77)    | 27.15<br>(21.01 to 35.43)    | 24.64<br>(17.08 to 34.13)   | 23.30<br>(13.37 to 38.52) |
| Virgin Islands, U.S.                   | 36.15<br>(33.07 to 39.16)    | 32.28<br>(29.41 to 35.34)    | 28.89<br>(26.27 to 31.63)    | 23.96<br>(21.92 to 26.13)    | 21.85<br>(19.98 to 23.84)    | 19.60<br>(17.85 to 21.49)    | 16.02<br>(14.53 to 17.66)    | 13.86<br>(12.24 to 15.59)    | 12.39<br>(10.60 to 14.43)   | 10.43<br>(8.37 to 12.95)  |
| Tropical Latin America                 | 126.85<br>(108.75 to 145.14) | 108.32<br>(95.87 to 122.70)  | 86.16<br>(76.41 to 97.17)    | 72.12<br>(65.08 to 80.25)    | 56.67<br>(51.02 to 63.09)    | 44.48<br>(39.33 to 50.62)    | 34.73<br>(29.77 to 40.47)    | 28.40<br>(23.44 to 34.11)    | 23.13<br>(18.04 to 29.97)   | 18.87<br>(14.27 to 24.88) |
| Brazil                                 | 126.52<br>(107.94 to 145.03) | 108.26<br>(95.56 to 122.72)  | 86.46<br>(76.32 to 97.84)    | 71.79<br>(64.60 to 80.07)    | 57.59<br>(51.64 to 63.64)    | 45.48<br>(39.68 to 52.42)    | 35.25<br>(29.82 to 41.13)    | 28.61<br>(23.67 to 34.59)    | 23.29<br>(18.11 to 30.14)   | 18.96<br>(14.40 to 24.84) |
| Paraguay                               | 76.23<br>(68.38 to 85.15)    | 67.89<br>(61.22 to 74.94)    | 58.53<br>(52.93 to 64.26)    | 48.76<br>(44.59 to 53.79)    | 37.26<br>(33.58 to 40.93)    | 32.32<br>(28.81 to 36.08)    | 32.08<br>(27.81 to 36.55)    | 29.60<br>(25.09 to 34.32)    | 25.60<br>(20.02 to 32.19)   | 21.00<br>(15.74 to 27.78) |
| Southeast Asia, East Asia, and Oceania | 126.70<br>(115.68 to 138.49) | 104.79<br>(96.91 to 112.82)  | 87.35<br>(81.28 to 94.06)    | 72.98<br>(67.52 to 78.50)    | 61.28<br>(56.29 to 66.43)    | 52.80<br>(48.64 to 57.40)    | 44.00<br>(40.93 to 47.35)    | 33.51<br>(31.07 to 36.02)    | 25.70<br>(23.52 to 28.10)   | 19.20<br>(16.69 to 22.10) |
| East Asia                              | 117.11<br>(104.35 to 130.53) | 93.95<br>(83.78 to 104.20)   | 77.60<br>(69.27 to 86.71)    | 64.53<br>(57.50 to 72.27)    | 54.17<br>(48.18 to 61.29)    | 47.37<br>(41.81 to 53.54)    | 38.62<br>(34.67 to 42.92)    | 25.72<br>(23.10 to 28.41)    | 18.45<br>(16.61 to 20.34)   | 13.48<br>(11.57 to 15.92) |
| China                                  | 119.58<br>(106.41 to 133.40) | 96.16<br>(85.71 to 106.79)   | 79.66<br>(71.01 to 89.03)    | 66.13<br>(58.94 to 74.18)    | 55.47<br>(49.17 to 62.74)    | 46.10<br>(40.97 to 51.60)    | 36.54<br>(32.85 to 40.61)    | 25.50<br>(22.83 to 28.25)    | 17.97<br>(16.08 to 19.89)   | 12.87<br>(11.16 to 15.03) |
| North Korea                            | 60.21<br>(46.55 to 76.14)    | 43.99<br>(33.82 to 54.75)    | 35.26<br>(26.82 to 45.17)    | 32.58<br>(25.18 to 41.25)    | 30.15<br>(23.06 to 38.66)    | 30.15<br>(41.09 to 174.34)   | 26.59<br>(45.02 to 152.80)   | 22.33<br>(28.68 to 46.59)    | 18.43<br>(26.06 to 42.71)   | 15.53<br>(21.95 to 37.73) |
| Taiwan (Province of China)             | 29.00<br>(28.41 to 29.61)    | 21.10<br>(20.63 to 21.66)    | 16.93<br>(16.50 to 17.38)    | 11.98<br>(11.67 to 12.34)    | 9.41<br>(9.12 to 9.73)       | 9.66<br>(9.34 to 9.98)       | 9.31<br>(9.02 to 9.60)       | 7.45<br>(7.16 to 7.76)       | 5.86<br>(5.56 to 6.16)      | 5.07<br>(4.42 to 5.89)    |
| Southeast Asia                         | 154.19<br>(143.54 to 164.07) | 131.51<br>(122.81 to 140.15) | 107.59<br>(101.99 to 113.21) | 90.18<br>(85.99 to 94.53)    | 75.50<br>(71.41 to 79.71)    | 61.80<br>(58.28 to 65.58)    | 51.19<br>(47.72 to 55.02)    | 42.56<br>(39.05 to 46.33)    | 33.75<br>(30.45 to 37.25)   | 24.89<br>(21.33 to 29.02) |
| Cambodia                               | 205.14<br>(173.97 to 238.77) | 274.41<br>(200.68 to 358.99) | 169.82<br>(153.40 to 187.29) | 148.25<br>(138.99 to 158.43) | 128.83<br>(121.13 to 137.23) | 120.75<br>(113.17 to 128.09) | 102.56<br>(95.23 to 109.96)  | 72.99<br>(66.34 to 80.29)    | 51.04<br>(44.90 to 57.49)   | 35.64<br>(29.17 to 43.23) |
| Indonesia                              | 188.64<br>(175.46 to 201.33) | 159.40<br>(148.97 to 169.85) | 133.40<br>(124.80 to 142.22) | 112.14<br>(104.57 to 119.56) | 94.12<br>(88.38 to 100.26)   | 75.12<br>(70.36 to 80.07)    | 60.15<br>(54.47 to 65.97)    | 49.49<br>(45.13 to 54.10)    | 39.59<br>(34.15 to 45.16)   | 29.18<br>(23.34 to 36.20) |
| Laos                                   | 313.42<br>(220.75 to 426.80) | 280.76<br>(209.86 to 360.28) | 252.76<br>(202.93 to 306.31) | 219.28<br>(191.22 to 249.68) | 199.55<br>(176.89 to 222.57) | 178.12<br>(158.21 to 200.57) | 152.52<br>(134.94 to 171.76) | 122.10<br>(106.13 to 139.23) | 90.11<br>(75.06 to 107.37)  | 64.18<br>(45.02 to 89.16) |
| Malaysia                               | 61.62<br>(60.45 to 62.83)    | 47.71<br>(45.17 to 50.14)    | 34.28<br>(31.55 to 37.13)    | 24.78<br>(24.18 to 25.37)    | 18.45<br>(18.03 to 18.92)    | 14.42<br>(14.11 to 14.76)    | 10.20<br>(9.92 to 10.49)     | 8.81<br>(8.58 to 9.06)       | 8.67<br>(8.25 to 9.10)      | 6.51<br>(5.47 to 7.72)    |
| Maldives                               | 413.27<br>(392.94 to 435.73) | 339.36<br>(330.71 to 347.94) | 285.13<br>(278.89 to 291.09) | 193.47<br>(188.41 to 198.34) | 113.23<br>(110.16 to 116.39) | 63.07<br>(61.00 to 65.18)    | 33.86<br>(32.31 to 35.42)    | 19.93<br>(18.84 to 21.00)    | 12.99<br>(12.08 to 13.94)   | 8.28<br>(7.32 to 9.46)    |
| Mauritius                              | 92.62<br>(90.29 to 94.95)    | 66.51<br>(64.61 to 68.36)    | 44.28<br>(43.04 to 45.48)    | 33.30<br>(32.26 to 34.39)    | 25.78<br>(24.96 to 26.66)    | 23.00<br>(22.12 to 23.86)    | 20.37<br>(19.51 to 21.17)    | 17.56<br>(17.71 to 19.21)    | 15.53<br>(16.74 to 18.50)   | 13.71<br>(13.71 to 17.63) |
| Myanmar                                | 227.09<br>(182.20 to 272.42) | 180.12<br>(146.81 to 217.75) | 149.66<br>(121.80 to 179.25) | 130.30<br>(107.17 to 155.46) | 117.38<br>(98.30 to 139.35)  | 106.19<br>(88.08 to 129.28)  | 92.77<br>(75.44 to 112.40)   | 73.87<br>(59.65 to 91.01)    | 50.44<br>(39.37 to 63.99)   | 31.75<br>(23.86 to 43.02) |
| Philippines                            | 109.75<br>(103.50 to 116.72) | 98.21<br>(93.09 to 103.83)   | 88.05<br>(82.99 to 93.33)    | 75.92<br>(71.65 to 80.39)    | 62.00<br>(58.50 to 65.58)    | 50.39<br>(47.16 to 53.71)    | 43.17<br>(39.94 to 46.36)    | 38.63<br>(35.14 to 42.41)    | 33.98<br>(30.11 to 38.26)   | 27.20<br>(22.90 to 32.32) |
| Sri Lanka                              | 74.87<br>(73.37 to 76.42)    | 73.56<br>(72.04 to 75.04)    | 48.57<br>(47.61 to 49.56)    | 35.46<br>(34.60 to 36.26)    | 35.20<br>(33.82 to 36.71)    | 22.41<br>(21.77 to 22.98)    | 18.27<br>(17.69 to 18.87)    | 19.05<br>(18.56 to 19.55)    | 14.05<br>(13.13 to 15.03)   | 7.32<br>(5.37 to 9.89)    |
| Seychelles                             | 75.13<br>(71.08 to 79.52)    | 53.05<br>(49.52 to 56.68)    | 34.55<br>(31.94 to 37.45)    | 25.49<br>(23.22 to 28.08)    | 20.60<br>(18.37 to 22.92)    | 15.79<br>(13.85 to 17.87)    | 14.51<br>(12.93 to 16.30)    | 14.44<br>(12.81 to 16.18)    | 14.10<br>(12.38 to 16.06)   | 12.36<br>(9.84 to 15.46)  |
| Thailand                               | 94.78<br>(88.46 to 100.65)   | 75.26<br>(69.68 to 80.94)    | 57.57<br>(52.65 to 62.94)    | 43.57<br>(38.71 to 48.83)    | 32.29<br>(27                 |                              |                              |                              |                             |                           |

Appendix Table 11B. Under-5 mortality rates by location, males, 1970, 1975, 1980, 1985, 1990, 1995, 2000, 2005, 2010, 2016

| Location                     | 1970                         | 1975                         | 1980                         | 1985                         | 1990                         | 1995                         | 2000                         | 2005                         | 2010                         | 2016                      |
|------------------------------|------------------------------|------------------------------|------------------------------|------------------------------|------------------------------|------------------------------|------------------------------|------------------------------|------------------------------|---------------------------|
| Fiji                         | 54.85<br>(48.21 to 61.92)    | 52.04<br>(42.22 to 63.80)    | 41.04<br>(31.27 to 53.35)    | 33.17<br>(23.87 to 44.05)    | 29.58<br>(19.86 to 43.53)    | 30.94<br>(22.10 to 41.96)    | 33.10<br>(26.02 to 41.64)    | 37.22<br>(28.93 to 46.67)    | 40.01<br>(29.41 to 53.12)    | 40.67<br>(23.83 to 66.06) |
| Guam                         | 37.16<br>(34.08 to 40.55)    | 28.24<br>(24.78 to 31.80)    | 18.52<br>(15.89 to 21.34)    | 14.85<br>(12.38 to 17.48)    | 13.81<br>(11.90 to 15.78)    | 13.23<br>(11.30 to 15.24)    | 12.43<br>(10.81 to 13.94)    | 13.76<br>(12.14 to 15.51)    | 15.48<br>(13.00 to 17.97)    | 15.21<br>(10.63 to 21.04) |
| Kiribati                     | 142.65<br>(105.01 to 185.60) | 112.83<br>(74.38 to 164.32)  | 97.93<br>(58.87 to 158.74)   | 94.99<br>(60.31 to 142.90)   | 85.31<br>(63.02 to 111.52)   | 74.69<br>(59.28 to 92.97)    | 68.07<br>(53.35 to 85.39)    | 65.34<br>(47.35 to 87.64)    | 61.14<br>(37.79 to 92.95)    | 50.85<br>(26.43 to 89.80) |
| Marshall Islands             | 89.58<br>(49.08 to 148.79)   | 73.34<br>(39.51 to 125.34)   | 60.43<br>(35.28 to 100.11)   | 56.17<br>(37.24 to 81.37)    | 47.46<br>(34.13 to 66.41)    | 39.39<br>(27.08 to 55.10)    | 44.59<br>(27.32 to 67.45)    | 36.80<br>(23.45 to 53.87)    | 30.73<br>(17.12 to 49.70)    | 24.95<br>(13.27 to 43.80) |
| Northern Mariana Islands     | 22.41<br>(12.20 to 38.32)    | 16.79<br>(8.50 to 31.27)     | 12.84<br>(6.99 to 22.69)     | 9.95<br>(5.10 to 17.09)      | 7.70<br>(4.02 to 13.00)      | 6.53<br>(3.59 to 10.33)      | 5.01<br>(3.78 to 6.57)       | 3.80<br>(2.82 to 5.03)       | 2.37<br>(1.65 to 3.42)       | 2.70<br>(1.49 to 4.43)    |
| Papua New Guinea             | 133.98<br>(105.58 to 164.35) | 118.74<br>(95.34 to 144.80)  | 110.47<br>(91.16 to 131.86)  | 103.73<br>(85.41 to 124.54)  | 95.94<br>(77.39 to 117.70)   | 86.43<br>(66.18 to 111.01)   | 78.53<br>(55.02 to 108.33)   | 75.16<br>(46.14 to 112.57)   | 67.43<br>(38.81 to 107.48)   | 53.82<br>(30.19 to 90.18) |
| Samoa                        | 63.28<br>(48.37 to 80.67)    | 50.00<br>(35.57 to 69.55)    | 34.53<br>(21.53 to 54.91)    | 29.56<br>(15.98 to 51.59)    | 24.75<br>(12.31 to 46.05)    | 20.64<br>(9.84 to 40.33)     | 17.51<br>(8.23 to 32.69)     | 15.75<br>(7.37 to 29.13)     | 13.99<br>(6.44 to 26.08)     | 11.54<br>(5.16 to 22.92)  |
| Solomon Islands              | 125.60<br>(95.12 to 158.58)  | 100.07<br>(71.86 to 135.35)  | 66.19<br>(46.68 to 94.25)    | 53.98<br>(37.32 to 73.74)    | 48.58<br>(34.97 to 65.42)    | 42.35<br>(30.83 to 56.48)    | 39.26<br>(28.64 to 52.02)    | 39.16<br>(27.44 to 53.34)    | 34.88<br>(23.64 to 50.19)    | 28.21<br>(18.43 to 41.90) |
| Tonga                        | 46.13<br>(32.13 to 63.65)    | 42.12<br>(28.58 to 58.56)    | 39.58<br>(25.60 to 57.23)    | 33.86<br>(20.90 to 51.74)    | 30.14<br>(17.91 to 46.52)    | 29.19<br>(17.19 to 46.10)    | 27.99<br>(16.30 to 45.27)    | 26.44<br>(15.57 to 43.10)    | 25.41<br>(14.51 to 43.11)    | 22.02<br>(11.53 to 39.05) |
| Vanuatu                      | 104.83<br>(72.36 to 148.68)  | 81.55<br>(52.93 to 119.33)   | 62.14<br>(40.55 to 90.26)    | 50.73<br>(36.31 to 67.74)    | 45.19<br>(34.53 to 57.49)    | 41.81<br>(32.16 to 53.04)    | 43.11<br>(33.43 to 54.74)    | 40.30<br>(34.05 to 58.76)    | 40.30<br>(27.91 to 55.54)    | 34.73<br>(22.23 to 54.55) |
| North Africa and Middle East | 207.51<br>(194.45 to 220.85) | 162.92<br>(154.35 to 172.05) | 128.62<br>(121.44 to 135.84) | 102.73<br>(96.28 to 109.67)  | 77.03<br>(73.25 to 81.56)    | 64.46<br>(60.83 to 68.07)    | 53.29<br>(49.68 to 57.13)    | 43.81<br>(39.66 to 48.13)    | 35.97<br>(31.88 to 40.63)    | 29.55<br>(24.16 to 36.31) |
| North Africa and Middle East | 207.51<br>(194.45 to 220.85) | 162.92<br>(154.35 to 172.05) | 128.62<br>(121.44 to 135.84) | 102.73<br>(96.28 to 109.67)  | 77.03<br>(73.25 to 81.56)    | 64.46<br>(60.83 to 68.07)    | 53.29<br>(49.68 to 57.13)    | 43.81<br>(39.66 to 48.13)    | 35.97<br>(31.88 to 40.63)    | 29.55<br>(24.16 to 36.31) |
| Afghanistan                  | 223.83<br>(169.42 to 291.44) | 213.59<br>(169.90 to 264.86) | 207.13<br>(168.25 to 249.35) | 190.65<br>(158.31 to 226.91) | 149.56<br>(130.00 to 172.50) | 145.67<br>(128.54 to 164.72) | 135.35<br>(117.83 to 155.18) | 112.76<br>(94.01 to 134.83)  | 88.10<br>(69.77 to 113.10)   | 67.97<br>(50.10 to 94.41) |
| Algeria                      | 181.29<br>(159.27 to 203.19) | 145.73<br>(130.17 to 162.89) | 107.80<br>(97.22 to 119.02)  | 72.84<br>(66.35 to 79.86)    | 52.47<br>(47.13 to 58.20)    | 43.19<br>(38.18 to 48.09)    | 35.52<br>(31.55 to 39.54)    | 29.70<br>(26.19 to 33.57)    | 25.47<br>(21.75 to 29.45)    | 19.70<br>(15.30 to 25.83) |
| Bahrain                      | 87.55<br>(67.98 to 109.89)   | 53.88<br>(43.67 to 65.87)    | 29.61<br>(27.10 to 32.35)    | 22.04<br>(20.40 to 23.72)    | 22.33<br>(20.78 to 23.95)    | 18.37<br>(16.83 to 19.92)    | 12.83<br>(11.72 to 14.00)    | 13.32<br>(12.08 to 14.57)    | 8.52<br>(7.71 to 9.37)       | 7.12<br>(5.47 to 9.14)    |
| Egypt                        | 234.85<br>(217.26 to 253.47) | 199.19<br>(182.97 to 215.19) | 155.17<br>(140.51 to 170.17) | 112.18<br>(102.35 to 123.04) | 81.35<br>(73.71 to 89.36)    | 61.14<br>(54.93 to 68.02)    | 45.02<br>(39.94 to 50.98)    | 36.28<br>(30.99 to 41.53)    | 29.42<br>(24.97 to 34.67)    | 20.64<br>(13.84 to 30.12) |
| Iran                         | 256.69<br>(211.53 to 303.63) | 148.21<br>(124.19 to 175.64) | 111.22<br>(94.14 to 127.70)  | 87.32<br>(74.06 to 102.42)   | 71.21<br>(61.06 to 83.41)    | 54.04<br>(45.10 to 63.70)    | 44.05<br>(35.57 to 54.12)    | 32.23<br>(24.14 to 42.33)    | 24.26<br>(17.71 to 32.69)    | 19.70<br>(13.92 to 27.15) |
| Iraq                         | 135.20<br>(111.88 to 158.69) | 111.18<br>(97.39 to 124.99)  | 87.34<br>(78.43 to 98.88)    | 75.99<br>(67.38 to 89.21)    | 57.17<br>(53.20 to 61.33)    | 55.17<br>(51.44 to 59.25)    | 45.66<br>(42.24 to 49.31)    | 42.74<br>(38.25 to 47.48)    | 35.49<br>(30.47 to 41.33)    | 29.84<br>(23.78 to 38.18) |
| Jordan                       | 98.92<br>(88.37 to 109.75)   | 79.76<br>(72.52 to 86.71)    | 57.58<br>(52.94 to 62.89)    | 42.36<br>(39.38 to 45.46)    | 34.83<br>(32.30 to 37.55)    | 30.96<br>(28.70 to 33.36)    | 27.43<br>(25.48 to 29.57)    | 23.59<br>(21.48 to 25.74)    | 19.97<br>(17.58 to 22.64)    | 17.45<br>(14.29 to 21.65) |
| Kuwait                       | 50.60<br>(48.24 to 53.02)    | 46.90<br>(44.90 to 48.79)    | 33.81<br>(32.07 to 35.44)    | 22.55<br>(21.43 to 23.75)    | 15.81<br>(13.82 to 17.87)    | 13.47<br>(12.60 to 14.41)    | 13.56<br>(12.67 to 14.51)    | 12.02<br>(11.23 to 12.92)    | 10.10<br>(10.79 to 12.28)    | 10.10<br>(7.57 to 13.23)  |
| Lebanon                      | 64.16<br>(51.58 to 80.56)    | 62.92<br>(49.00 to 79.24)    | 64.63<br>(44.77 to 90.79)    | 41.29<br>(32.28 to 52.61)    | 33.05<br>(27.39 to 39.75)    | 24.37<br>(19.67 to 29.70)    | 23.37<br>(13.73 to 23.04)    | 18.01<br>(9.52 to 18.41)     | 13.47<br>(8.08 to 14.81)     | 9.09<br>(6.70 to 12.08)   |
| Libya                        | 119.52<br>(105.65 to 135.05) | 88.53<br>(79.41 to 98.49)    | 64.56<br>(57.69 to 71.77)    | 50.45<br>(45.11 to 56.41)    | 42.39<br>(37.40 to 47.76)    | 34.21<br>(29.40 to 39.64)    | 28.50<br>(23.29 to 34.62)    | 22.91<br>(17.53 to 29.07)    | 16.95<br>(12.46 to 22.59)    | 14.48<br>(10.18 to 20.37) |
| Morocco                      | 204.47<br>(193.37 to 216.31) | 171.03<br>(162.12 to 180.59) | 132.86<br>(125.24 to 140.36) | 100.48<br>(94.37 to 107.05)  | 75.36<br>(69.87 to 80.91)    | 59.99<br>(54.55 to 65.23)    | 49.12<br>(42.73 to 55.46)    | 40.06<br>(32.32 to 48.70)    | 31.84<br>(24.54 to 40.38)    | 23.72<br>(17.23 to 32.15) |
| Palestine                    | 77.27<br>(57.00 to 102.93)   | 69.80<br>(56.20 to 85.33)    | 57.85<br>(49.78 to 67.71)    | 42.10<br>(36.45 to 49.01)    | 39.46<br>(34.17 to 44.84)    | 29.83<br>(25.85 to 34.63)    | 27.88<br>(23.97 to 32.83)    | 26.78<br>(22.83 to 31.75)    | 23.35<br>(19.50 to 27.60)    | 18.13<br>(13.03 to 24.73) |
| Oman                         | 267.55<br>(234.96 to 303.74) | 196.76<br>(169.85 to 223.75) | 130.70<br>(110.60 to 151.73) | 79.10<br>(65.15 to 95.50)    | 49.02<br>(39.25 to 61.39)    | 29.59<br>(23.74 to 36.85)    | 16.82<br>(14.26 to 19.71)    | 8.22<br>(7.81 to 8.64)       | 9.16<br>(8.78 to 9.58)       | 8.61<br>(7.52 to 9.75)    |
| Qatar                        | 72.71<br>(50.26 to 99.35)    | 63.23<br>(47.87 to 82.21)    | 36.20<br>(25.83 to 48.62)    | 28.28<br>(20.94 to 37.19)    | 22.83<br>(16.06 to 31.93)    | 20.15<br>(14.38 to 27.94)    | 17.79<br>(12.51 to 24.42)    | 14.76<br>(10.52 to 20.52)    | 12.47<br>(8.86 to 16.97)     | 10.33<br>(6.82 to 15.04)  |
| Saudi Arabia                 | 119.24<br>(126.67 to 200.41) | 117.85<br>(95.56 to 144.01)  | 87.71<br>(71.82 to 106.12)   | 65.37<br>(52.44 to 80.33)    | 51.24<br>(39.55 to 65.14)    | 37.43<br>(27.79 to 50.36)    | 26.23<br>(18.91 to 36.17)    | 18.48<br>(12.64 to 25.82)    | 12.67<br>(8.73 to 18.46)     | 7.27<br>(4.89 to 10.83)   |
| Sudan                        | 201.65<br>(183.12 to 223.83) | 195.82<br>(179.77 to 214.66) | 183.56<br>(165.86 to 203.02) | 240.65<br>(181.82 to 300.56) | 143.22<br>(128.87 to 158.17) | 122.75<br>(110.26 to 135.20) | 101.91<br>(91.33 to 113.73)  | 85.02<br>(74.97 to 95.36)    | 82.16<br>(70.60 to 94.19)    | 67.93<br>(52.90 to 88.21) |
| Syria                        | 105.54<br>(98.03 to 113.82)  | 81.33<br>(74.91 to 87.78)    | 64.72<br>(58.74 to 71.06)    | 53.92<br>(48.48 to 59.74)    | 46.17<br>(41.68 to 50.93)    | 31.66<br>(28.92 to 34.57)    | 20.01<br>(19.16 to 20.77)    | 17.22<br>(16.64 to 17.69)    | 17.00<br>(16.35 to 17.59)    | 24.99<br>(14.13 to 40.62) |
| Tunisia                      | 165.76<br>(155.99 to 176.01) | 122.29<br>(114.87 to 130.10) | 89.53<br>(84.04 to 94.92)    | 66.98<br>(62.45 to 72.01)    | 51.68<br>(47.79 to 55.87)    | 39.40<br>(35.86 to 43.15)    | 29.55<br>(26.33 to 32.99)    | 23.12<br>(19.83 to 26.74)    | 18.86<br>(15.71 to 22.42)    | 14.14<br>(11.14 to 17.90) |
| Turkey                       | 202.25<br>(184.30 to 220.81) | 168.97<br>(153.89 to 187.01) | 131.09<br>(117.31 to 146.57) | 97.24<br>(86.55 to 108.74)   | 74.53<br>(66.25 to 84.17)    | 59.10<br>(52.08 to 67.72)    | 43.36<br>(37.12 to 50.24)    | 31.59<br>(25.82 to 38.43)    | 24.09<br>(18.02 to 32.05)    | 17.25<br>(11.87 to 24.56) |
| United Arab Emirates         | 116.71<br>(80.67 to 161.03)  | 84.23<br>(55.35 to 125.79)   | 56.47<br>(36.04 to 82.06)    | 35.15<br>(19.78 to 57.55)    | 24.46<br>(13.09 to 40.17)    | 17.13<br>(8.86 to 30.26)     | 11.71<br>(6.27 to 19.76)     | 7.10<br>(5.61 to 8.95)       | 7.30<br>(4.20 to 11.71)      | 6.32<br>(3.29 to 11.31)   |
| Yemen                        | 326.23<br>(307.43 to 347.66) | 257.78<br>(245.03 to 271.64) | 198.70<br>(186.90 to 210.53) | 157.99<br>(147.94 to 168.55) | 131.51<br>(122.26 to 141.00) | 110.04<br>(102.39 to 118.09) | 89.69<br>(82.36 to 97.13)    | 70.08<br>(63.43 to 77.47)    | 53.72<br>(47.25 to 61.33)    | 44.62<br>(36.86 to 55.29) |
| South Asia                   | 213.90<br>(195.88 to 233.11) | 184.39<br>(172.61 to 196.37) | 158.29<br>(149.49 to 167.21) | 135.50<br>(128.55 to 142.62) | 114.92<br>(108.96 to 120.99) | 98.21<br>(92.68 to 104.52)   | 83.35<br>(78.05 to 89.05)    | 70.24<br>(64.88 to 76.04)    | 56.42<br>(50.70 to 63.06)    | 40.41<br>(34.93 to 47.48) |
| South Asia                   | 213.90<br>(195.88 to 233.11) | 184.39<br>(172.61 to 196.37) | 158.29<br>(149.49 to 167.21) | 135.50<br>(128.55 to 142.62) | 114.92<br>(108.96 to 120.99) | 98.21<br>(92.68 to 104.52)   | 83.35<br>(78.05 to 89.05)    | 70.24<br>(64.88 to 76.04)    | 56.42<br>(50.70 to 63.06)    | 40.41<br>(34.93 to 47.48) |
| Bangladesh                   | 254.94<br>(238.22 to 270.70) | 216.73<br>(204.62 to 228.79) | 191.98<br>(181.78 to 202.83) | 167.66<br>(159.58 to 176.78) | 139.33<br>(132.11 to 146.43) | 110.90<br>(104.35 to 117.40) | 87.93<br>(81.81 to 93.89)    | 69.46<br>(64.64 to 74.33)    | 52.63<br>(48.15 to 57.26)    | 35.67<br>(31.60 to 40.27) |
| Bhutan                       | 263.59<br>(222.24 to 307.50) | 232.90<br>(199.69 to 269.50) | 205.23<br>(177.69 to 235.21) | 169.54<br>(149.26 to 190.59) | 133.11<br>(118.94 to 147.78) | 106.15<br>(95.24 to 117.83)  | 84.91<br>(75.11 to 95.53)    | 65.13<br>(56.90 to 75.38)    | 49.11<br>(41.41 to 58.57)    | 34.01<br>(27.83 to 42.21) |
| India                        | 215.70<br>(195.89 to 236.99) | 186.72<br>(172.97 to 200.74) | 155.45<br>(143.93 to 167.24) | 131.21<br>(122.37 to 140.03) | 110.60<br>(103.86 to 117.58) | 94.27<br>(88.08 to 100.51)   | 80.15<br>(74.70 to 85.73)    | 67.44<br>(61.57 to 73.98)    | 53.30<br>(46.47 to 61.42)    | 37.86<br>(31.51 to 46.04) |
| Nepal                        | 249.31<br>(237.50 to 261.26) | 227.41<br>(214.09 to 240.70) | 201.21<br>(188.86 to 214.04) | 168.86<br>(158.37 to 179.56) | 135.72<br>(127.68 to 144.24) | 105.03<br>(98.37 to 111.70)  | 80.96<br>(75.65 to 86.39)    | 63.06<br>(57.77 to 68.17)    | 47.00<br>(42.12 to 52.43)    | 30.61<br>(26.37 to 35.58) |
| Pakistan                     | 171.43<br>(161.51 to 181.50) | 153.15<br>(144.86 to 161.43) | 137.48<br>(130.52 to 145.03) | 122.53<br>(116.18 to 129.07) | 108.61<br>(103.25 to 113.81) | 97.28<br>(92.25 to 102.71)   | 88.95<br>(83.48 to 94.77)    | 83.31<br>(76.67 to 89.78)    | 70.59<br>(63.22 to 78.35)    | 53.95<br>(46.25 to 63.08) |
| Sub-Saharan Africa           | 244.14<br>(225.19 to 263.78) | 227.49<br>(214.76 to 240.16) | 209.44<br>(199.99 to 219.40) | 194.35<br>(187.09 to 201.63) | 181.91<br>(175.46 to 188.37) | 170.54<br>(164.62 to 176.72) | 154.73<br>(148.86 to 160.98) | 132.12<br>(126.28 to 138.16) | 109.16<br>(101.51 to 117.47) | 82.09<br>(72.70 to 93.23) |
| Southern Sub-Saharan Africa  | 135.87<br>(119.06 to 154.19) | 122.90<br>(114.09 to 131.78) | 112.57<br>(105.92 to 119.58) | 97.13<br>(92.11 to 102.42)   | 81.28<br>(76.76 to 85.57)    | 76.07<br>(71.16 to 81.43)    | 81.87<br>(75.42 to 88.66)    | 83.75<br>(75.74 to 91.99)    | 70.77<br>(63.13 to 78.37)    | 50.49<br>(42.04 to 61.31) |
| Botswana                     | 105.59<br>(91.46 to 120.10)  | 86.24<br>(76.31 to 96.64)    | 73.66<br>(65.86 to 82.05)    | 63.68<br>(57.41 to 70.21)    | 54.89<br>(48.70 to 61.29)    | 63.61<br>(55.52 to 72.43)    | 63.61<br>(60.29 to 79.86)    | 52.13<br>(43.03 to 61.86)    | 30.13<br>(23.54 to 38.32)    | 16.91<br>(12.31 to        |



Appendix Table 11B. Under-5 mortality rates by location, males, 1970, 1975, 1980, 1985, 1990, 1995, 2000, 2005, 2010, 2016

| Location                   | 1970                         | 1975                         | 1980                         | 1985                         | 1990                         | 1995                         | 2000                         | 2005                         | 2010                         | 2016                         |
|----------------------------|------------------------------|------------------------------|------------------------------|------------------------------|------------------------------|------------------------------|------------------------------|------------------------------|------------------------------|------------------------------|
| Namibia                    | 100.64<br>(80.93 to 123.32)  | 97.90<br>(83.56 to 114.35)   | 100.30<br>(86.62 to 115.73)  | 87.30<br>(76.54 to 99.39)    | 77.24<br>(68.02 to 87.41)    | 64.79<br>(56.07 to 73.95)    | 69.69<br>(59.43 to 80.62)    | 72.52<br>(60.52 to 85.94)    | 61.31<br>(49.41 to 74.35)    | 40.99<br>(26.81 to 60.75)    |
| South Africa               | 140.11<br>(121.70 to 161.70) | 126.85<br>(116.31 to 137.89) | 116.37<br>(107.61 to 125.25) | 102.43<br>(95.67 to 109.60)  | 84.20<br>(78.44 to 90.00)    | 74.39<br>(67.74 to 81.68)    | 79.44<br>(72.11 to 87.20)    | 65.21<br>(69.75 to 90.81)    | 65.21<br>(56.44 to 73.65)    | 46.27<br>(34.86 to 60.45)    |
| Swaziland                  | 195.23<br>(142.19 to 263.55) | 157.04<br>(122.65 to 195.07) | 126.49<br>(107.54 to 147.52) | 99.50<br>(87.37 to 111.90)   | 75.20<br>(68.26 to 82.41)    | 77.94<br>(70.98 to 85.20)    | 103.33<br>(93.48 to 113.46)  | 114.66<br>(104.13 to 126.13) | 81.78<br>(71.60 to 93.30)    | 54.75<br>(43.37 to 68.63)    |
| Zimbabwe                   | 116.36<br>(101.63 to 132.15) | 107.59<br>(98.08 to 117.23)  | 100.55<br>(93.16 to 108.15)  | 83.23<br>(77.86 to 88.80)    | 75.02<br>(70.39 to 79.93)    | 80.93<br>(75.00 to 87.44)    | 85.34<br>(77.43 to 93.28)    | 90.36<br>(83.51 to 97.44)    | 85.10<br>(76.22 to 94.45)    | 62.13<br>(49.84 to 78.17)    |
| Western Sub-Saharan Africa | 277.36<br>(258.34 to 297.01) | 256.08<br>(239.50 to 273.25) | 234.01<br>(220.00 to 247.92) | 216.60<br>(206.10 to 227.45) | 204.70<br>(196.61 to 213.24) | 193.51<br>(185.71 to 201.89) | 178.00<br>(170.27 to 186.31) | 156.65<br>(148.76 to 165.25) | 132.25<br>(122.63 to 142.88) | 103.40<br>(92.45 to 116.63)  |
| Benin                      | 289.77<br>(272.72 to 305.10) | 261.16<br>(247.01 to 275.27) | 236.34<br>(221.82 to 251.08) | 211.71<br>(195.62 to 226.37) | 191.59<br>(177.58 to 205.62) | 170.41<br>(158.89 to 182.39) | 146.76<br>(135.41 to 158.03) | 121.66<br>(110.41 to 133.80) | 100.28<br>(88.20 to 114.16)  | 76.78<br>(64.06 to 93.08)    |
| Burkina Faso               | 317.58<br>(287.60 to 350.24) | 294.90<br>(272.35 to 319.17) | 265.71<br>(248.07 to 284.11) | 240.83<br>(225.48 to 256.79) | 219.39<br>(208.02 to 231.84) | 206.15<br>(193.67 to 218.48) | 187.11<br>(173.07 to 201.52) | 164.68<br>(150.36 to 179.72) | 143.46<br>(126.93 to 162.20) | 117.25<br>(99.63 to 139.75)  |
| Cameroon                   | 218.44<br>(206.02 to 231.94) | 195.88<br>(184.92 to 206.24) | 175.93<br>(165.20 to 186.72) | 154.25<br>(144.62 to 163.88) | 143.46<br>(134.46 to 152.83) | 147.04<br>(136.77 to 157.22) | 143.36<br>(132.24 to 156.61) | 131.49<br>(117.43 to 146.78) | 115.26<br>(97.78 to 135.32)  | 93.27<br>(73.48 to 117.72)   |
| Cape Verde                 | 191.00<br>(184.56 to 197.57) | 142.62<br>(136.88 to 148.39) | 96.55<br>(92.04 to 101.34)   | 95.54<br>(91.39 to 100.06)   | 69.26<br>(65.59 to 73.14)    | 77.51<br>(62.42 to 93.88)    | 49.55<br>(43.02 to 56.80)    | 37.02<br>(32.19 to 42.47)    | 26.30<br>(24.04 to 28.83)    | 19.50<br>(17.03 to 22.33)    |
| Chad                       | 270.88<br>(238.82 to 305.83) | 249.84<br>(225.68 to 274.82) | 237.26<br>(219.33 to 255.55) | 226.22<br>(211.40 to 241.67) | 203.92<br>(190.27 to 218.80) | 192.22<br>(177.69 to 206.34) | 189.18<br>(173.63 to 205.63) | 170.24<br>(153.39 to 187.56) | 146.00<br>(128.59 to 166.61) | 118.10<br>(100.08 to 141.38) |
| Cote d'Ivoire              | 240.97<br>(228.45 to 252.49) | 207.31<br>(197.03 to 218.33) | 178.75<br>(169.30 to 188.18) | 168.31<br>(158.62 to 178.54) | 164.25<br>(153.96 to 174.70) | 163.08<br>(152.72 to 173.47) | 151.61<br>(141.13 to 162.39) | 139.19<br>(125.35 to 153.33) | 120.98<br>(104.30 to 137.99) | 96.14<br>(80.14 to 114.90)   |
| The Gambia                 | 209.41<br>(181.30 to 240.42) | 186.01<br>(162.61 to 209.77) | 162.88<br>(144.85 to 182.60) | 140.15<br>(124.59 to 155.92) | 123.25<br>(109.13 to 137.16) | 106.98<br>(96.68 to 118.02)  | 92.19<br>(83.32 to 101.80)   | 77.66<br>(69.39 to 86.66)    | 64.57<br>(56.28 to 73.47)    | 52.39<br>(44.51 to 62.42)    |
| Ghana                      | 187.89<br>(177.53 to 198.29) | 170.53<br>(161.78 to 180.11) | 159.23<br>(151.26 to 167.58) | 149.38<br>(141.69 to 156.73) | 131.75<br>(124.50 to 139.00) | 118.90<br>(112.97 to 125.00) | 109.25<br>(103.71 to 115.28) | 98.11<br>(92.09 to 104.54)   | 81.96<br>(74.50 to 89.84)    | 58.48<br>(49.17 to 70.65)    |
| Guinea                     | 316.07<br>(270.85 to 363.81) | 303.56<br>(271.77 to 337.41) | 281.49<br>(257.44 to 306.19) | 261.01<br>(241.71 to 281.55) | 234.86<br>(219.73 to 250.49) | 210.22<br>(195.07 to 225.88) | 181.48<br>(165.69 to 198.78) | 157.91<br>(140.46 to 176.13) | 133.44<br>(114.68 to 155.41) | 103.63<br>(83.54 to 130.43)  |
| Guinea-Bissau              | 340.52<br>(296.05 to 390.64) | 306.19<br>(270.40 to 346.32) | 279.56<br>(250.75 to 308.57) | 259.79<br>(235.93 to 283.60) | 230.30<br>(210.64 to 251.94) | 200.71<br>(184.43 to 216.84) | 172.63<br>(158.56 to 186.78) | 150.39<br>(136.05 to 165.73) | 111.45<br>(99.07 to 123.65)  | 79.07<br>(68.16 to 91.62)    |
| Liberia                    | 312.36<br>(280.11 to 345.06) | 280.28<br>(255.81 to 305.99) | 255.88<br>(236.19 to 275.48) | 241.17<br>(224.29 to 258.43) | 228.42<br>(214.06 to 243.52) | 224.00<br>(212.04 to 237.17) | 179.63<br>(169.60 to 189.81) | 127.63<br>(117.50 to 137.58) | 97.93<br>(87.54 to 109.68)   | 69.04<br>(58.24 to 83.05)    |
| Mali                       | 363.15<br>(334.82 to 392.02) | 335.52<br>(314.07 to 358.12) | 297.37<br>(280.34 to 315.40) | 271.19<br>(255.77 to 285.76) | 244.84<br>(231.63 to 259.03) | 223.41<br>(210.01 to 237.45) | 201.08<br>(187.04 to 217.04) | 175.25<br>(159.46 to 191.72) | 149.80<br>(131.90 to 170.09) | 125.20<br>(102.15 to 155.53) |
| Mauritania                 | 180.62<br>(171.55 to 190.20) | 168.24<br>(158.69 to 178.36) | 148.70<br>(139.83 to 157.65) | 131.21<br>(123.14 to 139.40) | 116.50<br>(108.86 to 124.79) | 107.11<br>(98.76 to 115.70)  | 99.05<br>(90.75 to 107.85)   | 89.93<br>(80.52 to 99.40)    | 72.59<br>(63.39 to 82.25)    | 55.43<br>(46.80 to 65.62)    |
| Niger                      | 338.65<br>(308.70 to 371.91) | 338.09<br>(314.06 to 362.91) | 325.19<br>(305.78 to 345.65) | 314.47<br>(296.01 to 333.67) | 297.69<br>(281.95 to 314.47) | 271.86<br>(255.27 to 288.34) | 229.27<br>(212.00 to 246.74) | 182.74<br>(164.98 to 201.09) | 144.34<br>(125.48 to 166.04) | 111.41<br>(92.35 to 136.39)  |
| Nigeria                    | 279.10<br>(249.77 to 308.48) | 258.47<br>(235.44 to 282.42) | 237.61<br>(218.78 to 256.43) | 221.79<br>(209.59 to 235.12) | 217.88<br>(206.70 to 229.64) | 207.39<br>(196.37 to 218.43) | 192.83<br>(182.34 to 203.22) | 172.04<br>(161.41 to 183.01) | 146.30<br>(133.68 to 160.14) | 114.33<br>(97.72 to 133.46)  |
| Sao Tome and Principe      | 153.39<br>(144.14 to 163.46) | 123.17<br>(113.51 to 132.85) | 119.49<br>(108.78 to 130.56) | 131.09<br>(122.46 to 140.18) | 112.92<br>(102.77 to 123.00) | 97.95<br>(87.69 to 108.32)   | 80.43<br>(70.96 to 90.49)    | 67.03<br>(57.00 to 77.41)    | 47.44<br>(40.84 to 54.51)    | 34.96<br>(28.59 to 42.34)    |
| Senegal                    | 273.72<br>(257.14 to 291.82) | 248.00<br>(234.12 to 262.47) | 212.50<br>(199.60 to 225.55) | 183.23<br>(173.12 to 193.68) | 154.11<br>(145.80 to 162.53) | 140.32<br>(131.02 to 150.05) | 123.61<br>(114.28 to 133.35) | 99.88<br>(93.75 to 106.18)   | 75.90<br>(69.98 to 82.56)    | 55.07<br>(48.74 to 62.66)    |
| Sierra Leone               | 313.72<br>(275.18 to 356.41) | 293.62<br>(262.83 to 327.93) | 282.71<br>(257.69 to 307.84) | 271.05<br>(251.88 to 291.26) | 254.49<br>(238.68 to 271.02) | 239.74<br>(225.28 to 253.39) | 225.01<br>(211.35 to 237.83) | 195.85<br>(181.94 to 208.70) | 161.98<br>(147.26 to 176.45) | 121.78<br>(106.73 to 138.88) |
| Togo                       | 236.26<br>(213.38 to 259.01) | 207.33<br>(190.35 to 224.35) | 181.43<br>(168.95 to 194.32) | 166.89<br>(155.50 to 178.56) | 154.18<br>(143.00 to 166.22) | 143.62<br>(131.94 to 155.25) | 131.13<br>(119.67 to 142.59) | 117.68<br>(105.81 to 130.28) | 99.78<br>(88.13 to 113.49)   | 75.22<br>(63.96 to 89.64)    |
| Eastern Sub-Saharan Africa | 235.97<br>(218.30 to 252.45) | 223.48<br>(209.72 to 236.30) | 207.37<br>(197.03 to 217.63) | 195.92<br>(187.53 to 204.30) | 179.61<br>(172.31 to 186.59) | 164.40<br>(158.07 to 170.83) | 141.70<br>(135.43 to 148.13) | 113.32<br>(106.59 to 119.97) | 89.33<br>(81.25 to 97.86)    | 64.33<br>(54.85 to 76.46)    |
| Burundi                    | 245.59<br>(212.67 to 278.54) | 239.37<br>(211.79 to 268.86) | 219.98<br>(196.17 to 244.09) | 191.41<br>(172.15 to 211.80) | 184.39<br>(165.72 to 205.44) | 182.14<br>(163.59 to 201.59) | 172.28<br>(152.38 to 192.76) | 133.44<br>(117.59 to 150.94) | 102.84<br>(84.03 to 123.15)  | 86.17<br>(58.94 to 126.96)   |
| Comoros                    | 223.19<br>(176.57 to 271.04) | 200.46<br>(169.90 to 229.59) | 178.08<br>(156.41 to 199.75) | 149.01<br>(132.25 to 168.69) | 126.42<br>(111.42 to 141.92) | 110.49<br>(97.60 to 124.57)  | 101.53<br>(88.06 to 115.72)  | 82.85<br>(70.63 to 95.79)    | 70.80<br>(56.43 to 87.89)    | 55.18<br>(39.09 to 78.68)    |
| Djibouti                   | 150.24<br>(125.82 to 177.80) | 139.44<br>(119.55 to 160.64) | 132.62<br>(117.45 to 148.75) | 130.55<br>(117.77 to 143.82) | 124.57<br>(112.93 to 136.38) | 119.40<br>(106.48 to 132.65) | 109.61<br>(95.77 to 123.67)  | 90.85<br>(77.00 to 106.41)   | 74.27<br>(61.15 to 90.99)    | 52.34<br>(41.92 to 66.31)    |
| Eritrea                    | 246.08<br>(213.32 to 281.41) | 221.81<br>(200.07 to 245.48) | 203.01<br>(184.78 to 220.57) | 184.26<br>(169.27 to 200.99) | 160.87<br>(146.01 to 175.50) | 124.24<br>(112.03 to 137.95) | 99.99<br>(86.80 to 114.20)   | 84.57<br>(70.17 to 100.42)   | 73.76<br>(59.24 to 91.08)    | 56.38<br>(44.28 to 73.01)    |
| Ethiopia                   | 265.77<br>(234.72 to 297.00) | 264.48<br>(241.68 to 287.43) | 247.28<br>(230.22 to 264.86) | 225.01<br>(209.74 to 241.15) | 204.75<br>(191.43 to 219.26) | 178.70<br>(167.49 to 190.22) | 149.98<br>(139.80 to 161.10) | 114.11<br>(103.45 to 125.49) | 80.27<br>(69.59 to 93.59)    | 47.60<br>(38.93 to 58.75)    |
| Kenya                      | 152.01<br>(143.24 to 160.93) | 134.47<br>(127.14 to 142.67) | 117.71<br>(109.90 to 125.52) | 107.63<br>(101.60 to 114.78) | 102.40<br>(96.45 to 108.72)  | 104.74<br>(98.21 to 111.10)  | 96.72<br>(90.19 to 103.55)   | 79.63<br>(73.46 to 86.70)    | 61.24<br>(54.75 to 67.92)    | 47.28<br>(40.04 to 55.85)    |
| Madagascar                 | 186.98<br>(163.77 to 213.39) | 178.62<br>(158.76 to 200.45) | 176.67<br>(158.60 to 195.70) | 181.18<br>(162.93 to 200.86) | 157.60<br>(144.11 to 171.74) | 142.66<br>(129.04 to 157.19) | 123.32<br>(109.96 to 136.11) | 106.54<br>(93.04 to 119.86)  | 101.17<br>(85.23 to 117.43)  | 83.90<br>(66.63 to 107.05)   |
| Malawi                     | 348.92<br>(316.09 to 385.84) | 310.83<br>(282.82 to 339.36) | 272.30<br>(251.38 to 294.80) | 253.61<br>(235.65 to 272.70) | 234.52<br>(217.76 to 252.11) | 203.08<br>(188.34 to 219.61) | 172.94<br>(158.59 to 187.47) | 129.75<br>(118.20 to 141.08) | 105.25<br>(93.50 to 118.52)  | 73.12<br>(58.15 to 93.42)    |
| Mozambique                 | 266.65<br>(235.09 to 297.89) | 249.63<br>(227.00 to 271.97) | 240.25<br>(224.86 to 256.09) | 265.53<br>(247.36 to 283.36) | 224.49<br>(213.71 to 235.44) | 204.02<br>(194.59 to 213.46) | 170.24<br>(161.60 to 179.47) | 137.07<br>(127.80 to 146.17) | 109.72<br>(98.93 to 121.23)  | 81.15<br>(70.00 to 95.43)    |
| Rwanda                     | 263.06<br>(240.23 to 287.84) | 257.25<br>(234.72 to 279.86) | 222.39<br>(203.95 to 241.24) | 182.30<br>(167.33 to 199.47) | 177.02<br>(163.21 to 192.04) | 193.70<br>(175.10 to 212.26) | 164.51<br>(149.19 to 180.51) | 111.68<br>(100.11 to 123.88) | 71.04<br>(61.68 to 81.07)    | 53.12<br>(41.31 to 69.28)    |
| Somalia                    | 225.98<br>(179.91 to 274.97) | 254.60<br>(204.95 to 304.91) | 215.34<br>(178.63 to 252.99) | 217.63<br>(183.87 to 249.54) | 196.61<br>(169.66 to 221.87) | 184.27<br>(159.92 to 209.70) | 168.79<br>(146.94 to 192.01) | 143.84<br>(120.95 to 168.95) | 156.38<br>(124.74 to 192.46) | 104.65<br>(81.38 to 134.67)  |
| South Sudan                | 274.01<br>(208.36 to 358.12) | 261.54<br>(205.84 to 328.67) | 249.81<br>(205.68 to 297.30) | 236.62<br>(207.10 to 267.85) | 212.45<br>(191.21 to 235.01) | 181.41<br>(164.30 to 198.30) | 152.28<br>(138.95 to 165.63) | 131.44<br>(117.57 to 145.70) | 114.34<br>(97.19 to 133.10)  | 99.52<br>(78.09 to 125.48)   |
| Tanzania                   | 215.62<br>(198.78 to 231.85) | 196.90<br>(185.88 to 207.83) | 181.73<br>(173.43 to 190.87) | 170.94<br>(163.60 to 178.29) | 159.68<br>(152.69 to 167.25) | 147.88<br>(141.11 to 154.66) | 127.67<br>(121.42 to 134.23) | 103.47<br>(96.82 to 110.20)  | 80.19<br>(72.65 to 88.20)    | 58.79<br>(50.57 to 69.36)    |

Appendix Table 11B. Under-5 mortality rates by location, males, 1970, 1975, 1980, 1985, 1990, 1995, 2000, 2005, 2010, 2016

| Location                         | 1970                         | 1975                         | 1980                         | 1985                         | 1990                         | 1995                         | 2000                         | 2005                         | 2010                         | 2016                         |
|----------------------------------|------------------------------|------------------------------|------------------------------|------------------------------|------------------------------|------------------------------|------------------------------|------------------------------|------------------------------|------------------------------|
| Uganda                           | 221.58<br>(203.09 to 240.04) | 211.48<br>(198.19 to 225.09) | 211.06<br>(199.56 to 222.86) | 200.35<br>(190.87 to 210.06) | 187.31<br>(179.23 to 194.79) | 172.24<br>(164.99 to 179.71) | 147.62<br>(140.55 to 154.64) | 123.49<br>(116.47 to 130.51) | 99.29<br>(91.19 to 108.12)   | 69.27<br>(60.58 to 80.28)    |
| Zambia                           | 190.44<br>(167.19 to 216.64) | 167.66<br>(149.37 to 184.97) | 163.61<br>(148.24 to 181.39) | 171.55<br>(156.58 to 188.18) | 177.09<br>(160.23 to 194.64) | 169.57<br>(153.70 to 185.53) | 152.53<br>(137.68 to 167.62) | 123.91<br>(109.74 to 137.34) | 93.90<br>(80.06 to 109.56)   | 67.30<br>(53.63 to 83.83)    |
| Central Sub-Saharan Africa       | 216.10<br>(170.66 to 265.91) | 203.30<br>(166.63 to 240.45) | 189.93<br>(165.74 to 214.55) | 171.69<br>(155.59 to 190.16) | 173.96<br>(159.30 to 188.68) | 167.96<br>(152.75 to 184.26) | 157.73<br>(142.09 to 174.81) | 133.50<br>(120.69 to 147.57) | 111.08<br>(95.36 to 127.04)  | 79.97<br>(60.07 to 104.95)   |
| Angola                           | 215.35<br>(164.96 to 274.24) | 207.64<br>(161.88 to 257.51) | 202.44<br>(165.39 to 242.42) | 194.22<br>(168.45 to 221.02) | 197.10<br>(174.22 to 222.41) | 171.96<br>(151.22 to 193.52) | 158.93<br>(139.36 to 180.76) | 128.68<br>(113.04 to 147.54) | 98.72<br>(82.94 to 118.43)   | 58.97<br>(43.93 to 77.91)    |
| Central African Republic         | 180.31<br>(147.56 to 217.68) | 185.22<br>(153.52 to 218.81) | 179.37<br>(151.83 to 209.78) | 180.59<br>(152.64 to 208.60) | 185.09<br>(158.83 to 215.26) | 185.11<br>(155.26 to 217.34) | 188.60<br>(158.30 to 225.13) | 179.18<br>(146.24 to 217.89) | 163.90<br>(129.47 to 204.20) | 137.97<br>(101.61 to 186.69) |
| Congo                            | 167.46<br>(121.89 to 230.84) | 145.78<br>(106.63 to 199.01) | 123.67<br>(99.49 to 150.55)  | 102.73<br>(88.88 to 117.12)  | 99.09<br>(87.53 to 112.89)   | 104.43<br>(89.83 to 121.66)  | 108.83<br>(92.84 to 125.37)  | 92.56<br>(79.94 to 105.96)   | 73.22<br>(57.87 to 92.14)    | 57.73<br>(37.59 to 87.11)    |
| Democratic Republic of the Congo | 221.48<br>(167.54 to 282.88) | 207.26<br>(164.83 to 255.79) | 191.71<br>(160.02 to 225.06) | 168.51<br>(147.18 to 193.20) | 170.77<br>(149.91 to 192.86) | 170.43<br>(148.50 to 194.01) | 159.76<br>(138.40 to 185.71) | 135.97<br>(117.44 to 157.45) | 115.44<br>(94.83 to 138.18)  | 85.59<br>(62.20 to 114.53)   |
| Equatorial Guinea                | 246.31<br>(179.00 to 326.15) | 224.91<br>(175.04 to 278.60) | 196.57<br>(159.36 to 235.82) | 191.34<br>(159.67 to 225.39) | 205.59<br>(175.13 to 241.55) | 216.07<br>(182.59 to 254.44) | 156.55<br>(126.50 to 189.56) | 120.17<br>(90.33 to 156.07)  | 94.32<br>(64.90 to 132.67)   | 62.44<br>(40.87 to 95.65)    |
| Gabon                            | 186.70<br>(153.03 to 223.36) | 153.05<br>(130.31 to 177.08) | 124.55<br>(109.62 to 140.57) | 105.08<br>(94.44 to 115.95)  | 94.04<br>(85.24 to 103.15)   | 83.98<br>(76.77 to 91.84)    | 78.38<br>(70.76 to 86.32)    | 73.82<br>(65.13 to 83.52)    | 63.53<br>(53.89 to 75.68)    | 50.10<br>(40.11 to 63.50)    |

Appendix Table 11C. Under-5 mortality rates by location, females, 1970, 1975, 1980, 1985, 1990, 1995, 2000, 2005, 2010, 2016

| Location                  | 1970                         | 1975                         | 1980                         | 1985                         | 1990                         | 1995                         | 2000                         | 2005                         | 2010                      | 2016                      |
|---------------------------|------------------------------|------------------------------|------------------------------|------------------------------|------------------------------|------------------------------|------------------------------|------------------------------|---------------------------|---------------------------|
| Global                    | 139.58<br>(134.84 to 144.50) | 122.85<br>(119.08 to 126.69) | 107.42<br>(104.03 to 110.86) | 94.01<br>(91.34 to 96.67)    | 82.05<br>(79.70 to 84.56)    | 74.77<br>(72.76 to 76.85)    | 66.89<br>(65.48 to 68.36)    | 57.60<br>(55.80 to 59.34)    | 47.71<br>(45.24 to 50.40) | 36.35<br>(33.32 to 39.86) |
| High SDI                  | 83.37<br>(78.14 to 88.98)    | 65.22<br>(62.10 to 68.44)    | 52.93<br>(49.71 to 56.12)    | 41.93<br>(39.62 to 44.28)    | 34.48<br>(32.72 to 36.45)    | 28.65<br>(27.20 to 30.19)    | 22.35<br>(20.99 to 23.80)    | 16.91<br>(15.77 to 18.23)    | 12.95<br>(11.82 to 14.22) | 10.12<br>(8.85 to 11.63)  |
| High-middle SDI           | 23.28<br>(22.77 to 23.86)    | 18.17<br>(17.66 to 18.73)    | 13.76<br>(13.39 to 14.20)    | 10.85<br>(10.64 to 11.10)    | 9.05<br>(8.89 to 9.26)       | 7.32<br>(7.20 to 7.46)       | 6.17<br>(6.11 to 6.22)       | 5.58<br>(5.54 to 5.63)       | 4.88<br>(4.85 to 4.91)    | 4.44<br>(4.17 to 4.76)    |
| Middle SDI                | 201.40<br>(195.28 to 207.77) | 178.17<br>(171.75 to 184.24) | 155.55<br>(150.58 to 160.45) | 136.18<br>(131.95 to 140.71) | 117.42<br>(113.24 to 121.60) | 104.99<br>(101.87 to 108.15) | 92.08<br>(89.79 to 94.35)    | 78.71<br>(75.95 to 81.45)    | 64.42<br>(61.02 to 68.10) | 47.60<br>(43.92 to 51.84) |
| Low-middle SDI            | 228.30<br>(215.13 to 241.85) | 214.19<br>(206.33 to 221.92) | 197.81<br>(192.44 to 203.18) | 182.64<br>(177.83 to 187.56) | 166.19<br>(161.51 to 170.80) | 152.66<br>(147.85 to 157.69) | 134.53<br>(130.93 to 138.23) | 111.37<br>(107.59 to 115.35) | 91.12<br>(85.68 to 96.91) | 65.77<br>(58.19 to 74.16) |
| Low SDI                   | 132.06<br>(124.61 to 139.68) | 108.26<br>(102.95 to 113.84) | 87.95<br>(83.26 to 93.10)    | 71.23<br>(67.76 to 74.87)    | 57.26<br>(54.59 to 60.20)    | 46.52<br>(44.44 to 48.66)    | 37.65<br>(36.01 to 39.25)    | 30.32<br>(29.05 to 31.58)    | 23.49<br>(21.98 to 25.17) | 17.60<br>(15.47 to 20.06) |
| High-income               | 26.65<br>(26.12 to 27.23)    | 21.13<br>(20.64 to 21.68)    | 15.18<br>(14.82 to 15.61)    | 11.73<br>(11.52 to 11.97)    | 9.96<br>(9.81 to 10.17)      | 7.97<br>(7.86 to 8.10)       | 6.77<br>(6.73 to 6.82)       | 6.07<br>(6.03 to 6.12)       | 5.35<br>(5.32 to 5.37)    | 4.86<br>(4.61 to 5.15)    |
| High-income North America | 20.97<br>(20.73 to 21.23)    | 16.68<br>(16.50 to 16.86)    | 13.21<br>(13.07 to 13.36)    | 11.02<br>(10.90 to 11.16)    | 9.63<br>(9.52 to 9.75)       | 7.97<br>(7.87 to 8.07)       | 7.18<br>(7.10 to 7.27)       | 7.04<br>(6.95 to 7.12)       | 6.34<br>(6.26 to 6.41)    | 6.02<br>(5.81 to 6.24)    |
| Canada                    | 20.03<br>(19.52 to 20.51)    | 15.26<br>(14.85 to 15.66)    | 11.02<br>(10.73 to 11.34)    | 8.63<br>(8.38 to 8.87)       | 7.35<br>(7.13 to 7.58)       | 6.52<br>(6.31 to 6.73)       | 5.59<br>(5.46 to 5.71)       | 5.55<br>(5.37 to 5.75)       | 5.26<br>(5.08 to 5.44)    | 4.94<br>(4.93 to 4.94)    |
| Greenland                 | 40.94<br>(37.14 to 45.03)    | 34.05<br>(31.11 to 37.35)    | 34.46<br>(31.25 to 38.38)    | 33.83<br>(30.25 to 38.01)    | 35.20<br>(31.24 to 39.79)    | 24.63<br>(21.67 to 28.19)    | 17.36<br>(15.20 to 19.88)    | 16.45<br>(14.34 to 18.90)    | 15.35<br>(13.24 to 17.81) | 13.42<br>(12.07 to 14.92) |
| United States             | 21.08<br>(20.71 to 21.44)    | 16.97<br>(16.61 to 17.29)    | 13.53<br>(13.30 to 13.78)    | 11.25<br>(11.07 to 11.42)    | 9.85<br>(9.65 to 10.04)      | 8.14<br>(7.98 to 8.29)       | 7.35<br>(7.25 to 7.46)       | 7.20<br>(7.07 to 7.34)       | 6.50<br>(6.37 to 6.65)    | 6.20<br>(6.12 to 6.28)    |
| Australasia               | 18.77<br>(18.42 to 19.15)    | 15.54<br>(15.21 to 15.87)    | 11.80<br>(11.53 to 12.08)    | 10.40<br>(10.15 to 10.65)    | 8.42<br>(8.20 to 8.64)       | 6.46<br>(6.31 to 6.60)       | 5.83<br>(5.68 to 5.99)       | 5.34<br>(5.18 to 5.49)       | 4.61<br>(4.47 to 4.74)    | 3.75<br>(3.52 to 4.01)    |
| Australia                 | 18.95<br>(18.51 to 19.38)    | 15.37<br>(15.01 to 15.75)    | 11.43<br>(11.13 to 11.74)    | 10.09<br>(9.81 to 10.39)     | 8.20<br>(7.95 to 8.45)       | 6.20<br>(6.02 to 6.40)       | 5.65<br>(5.47 to 5.83)       | 5.21<br>(5.05 to 5.36)       | 4.38<br>(4.23 to 4.53)    | 3.51<br>(3.28 to 3.77)    |
| New Zealand               | 18.05<br>(17.46 to 18.64)    | 16.23<br>(15.69 to 16.77)    | 13.46<br>(12.96 to 13.95)    | 11.81<br>(11.43 to 12.21)    | 9.37<br>(9.05 to 9.71)       | 7.57<br>(7.26 to 7.89)       | 6.64<br>(6.44 to 6.83)       | 5.91<br>(5.64 to 6.18)       | 5.67<br>(5.43 to 5.91)    | 5.01<br>(4.79 to 5.26)    |
| High-income Asia Pacific  | 28.49<br>(26.17 to 31.06)    | 20.03<br>(17.86 to 22.47)    | 13.99<br>(12.21 to 16.18)    | 9.70<br>(8.52 to 11.10)      | 7.55<br>(6.67 to 8.81)       | 6.18<br>(5.59 to 6.83)       | 4.90<br>(4.78 to 5.01)       | 3.94<br>(3.84 to 4.04)       | 3.19<br>(3.11 to 3.26)    | 2.70<br>(2.44 to 3.01)    |
| Brunei                    | 63.95<br>(61.65 to 66.37)    | 39.36<br>(37.69 to 41.05)    | 21.18<br>(19.81 to 22.64)    | 13.52<br>(12.64 to 14.46)    | 10.19<br>(9.46 to 11.01)     | 8.64<br>(7.93 to 9.29)       | 7.73<br>(7.32 to 8.31)       | 7.60<br>(7.22 to 8.29)       | 7.60<br>(7.06 to 8.16)    | 6.03<br>(7.25 to 8.96)    |
| Japan                     | 15.08<br>(14.85 to 15.34)    | 11.92<br>(11.70 to 12.13)    | 8.87<br>(8.70 to 9.03)       | 6.67<br>(6.52 to 6.81)       | 5.74<br>(5.61 to 5.87)       | 4.14<br>(4.04 to 4.24)       | 3.48<br>(3.40 to 3.57)       | 3.48<br>(2.86 to 3.03)       | 2.94<br>(2.36 to 3.48)    | 2.47<br>(2.31 to 2.64)    |
| Singapore                 | 24.41<br>(23.60 to 25.19)    | 16.56<br>(15.96 to 17.23)    | 13.09<br>(12.60 to 13.60)    | 9.39<br>(8.98 to 9.83)       | 7.39<br>(6.34 to 6.92)       | 5.53<br>(4.32 to 4.77)       | 4.53<br>(3.19 to 3.60)       | 3.40<br>(2.51 to 2.86)       | 2.67<br>(2.21 to 2.55)    | 1.98<br>(1.79 to 2.18)    |
| South Korea               | 55.12<br>(48.27 to 62.75)    | 37.61<br>(30.69 to 45.34)    | 23.82<br>(18.33 to 30.46)    | 16.66<br>(12.56 to 21.58)    | 11.23<br>(8.46 to 15.04)     | 7.71<br>(6.15 to 9.53)       | 6.57<br>(6.33 to 6.82)       | 5.22<br>(5.02 to 5.44)       | 3.84<br>(3.69 to 4.01)    | 3.29<br>(2.59 to 4.09)    |
| Western Europe            | 23.23<br>(23.00 to 23.46)    | 18.21<br>(18.02 to 18.39)    | 13.02<br>(12.90 to 13.15)    | 9.89<br>(9.77 to 10.01)      | 8.15<br>(8.06 to 8.23)       | 6.11<br>(6.04 to 6.18)       | 5.11<br>(5.06 to 5.17)       | 4.32<br>(4.27 to 4.38)       | 3.84<br>(3.80 to 3.88)    | 3.32<br>(2.97 to 3.72)    |
| Andorra                   | 19.45<br>(15.88 to 24.03)    | 11.31<br>(9.11 to 13.95)     | 6.57<br>(5.23 to 8.24)       | 5.41<br>(4.74 to 7.35)       | 3.93<br>(4.45 to 6.61)       | 2.89<br>(3.28 to 4.70)       | 2.89<br>(2.39 to 3.52)       | 3.05<br>(2.51 to 3.74)       | 2.95<br>(2.43 to 3.54)    | 3.07<br>(2.55 to 3.76)    |
| Austria                   | 25.77<br>(24.87 to 26.69)    | 20.79<br>(20.04 to 21.54)    | 14.55<br>(13.96 to 15.24)    | 11.43<br>(10.92 to 11.90)    | 8.40<br>(7.98 to 8.84)       | 5.96<br>(5.63 to 6.31)       | 5.01<br>(4.70 to 5.32)       | 4.31<br>(4.08 to 4.56)       | 3.98<br>(3.75 to 4.24)    | 2.95<br>(2.52 to 3.47)    |
| Belgium                   | 21.27<br>(20.95 to 21.62)    | 16.57<br>(16.29 to 16.85)    | 12.70<br>(12.44 to 12.96)    | 10.04<br>(9.82 to 10.28)     | 8.52<br>(8.35 to 8.68)       | 6.53<br>(6.37 to 6.70)       | 5.04<br>(4.92 to 5.17)       | 4.28<br>(4.14 to 4.42)       | 3.89<br>(3.76 to 4.03)    | 3.43<br>(3.15 to 3.73)    |
| Cyprus                    | 34.89<br>(31.26 to 38.96)    | 26.66<br>(24.93 to 28.83)    | 17.44<br>(16.46 to 18.66)    | 13.20<br>(12.45 to 14.13)    | 11.33<br>(11.00 to 11.70)    | 9.42<br>(8.70 to 10.28)      | 7.43<br>(6.75 to 8.23)       | 5.64<br>(5.09 to 6.26)       | 3.88<br>(3.49 to 4.32)    | 2.92<br>(2.47 to 3.41)    |
| Denmark                   | 14.12<br>(13.54 to 14.71)    | 10.45<br>(9.95 to 10.97)     | 8.75<br>(8.28 to 9.29)       | 7.27<br>(7.75 to 8.83)       | 5.91<br>(7.33 to 8.33)       | 4.32<br>(5.59 to 6.27)       | 3.42<br>(4.67 to 5.39)       | 3.42<br>(4.06 to 4.59)       | 3.81<br>(3.56 to 4.05)    | 3.75<br>(3.44 to 4.12)    |
| Finland                   | 14.19<br>(13.46 to 14.98)    | 10.96<br>(10.31 to 11.63)    | 7.70<br>(7.21 to 8.25)       | 6.40<br>(5.95 to 6.84)       | 4.42<br>(5.53 to 6.45)       | 3.73<br>(4.09 to 4.79)       | 3.48<br>(3.43 to 4.07)       | 3.48<br>(3.18 to 3.79)       | 2.69<br>(2.42 to 2.96)    | 1.96<br>(1.62 to 2.37)    |
| France                    | 15.98<br>(15.70 to 16.27)    | 14.29<br>(14.04 to 14.55)    | 10.73<br>(10.51 to 10.97)    | 8.63<br>(8.43 to 8.82)       | 6.32<br>(7.41 to 7.77)       | 5.32<br>(5.16 to 5.47)       | 4.74<br>(4.60 to 4.90)       | 3.88<br>(3.75 to 4.03)       | 3.41<br>(3.63 to 3.83)    | 3.14<br>(2.88 to 4.04)    |
| Germany                   | 22.40<br>(22.03 to 22.81)    | 18.80<br>(18.43 to 19.16)    | 13.28<br>(12.99 to 13.56)    | 9.64<br>(9.42 to 9.89)       | 7.91<br>(7.71 to 8.11)       | 5.76<br>(5.68 to 5.83)       | 4.81<br>(4.66 to 4.96)       | 4.27<br>(4.14 to 4.43)       | 3.79<br>(3.66 to 3.94)    | 3.27<br>(2.79 to 3.90)    |
| Greece                    | 31.72<br>(31.08 to 32.38)    | 24.63<br>(24.05 to 25.16)    | 18.38<br>(17.91 to 18.87)    | 13.96<br>(13.54 to 14.34)    | 9.65<br>(9.33 to 9.98)       | 7.81<br>(7.56 to 8.10)       | 6.48<br>(5.59 to 6.04)       | 4.21<br>(4.04 to 4.37)       | 3.74<br>(3.58 to 3.91)    | 3.62<br>(3.32 to 3.96)    |
| Iceland                   | 13.61<br>(12.57 to 14.75)    | 11.38<br>(10.72 to 12.19)    | 8.35<br>(7.65 to 9.17)       | 6.88<br>(6.24 to 7.59)       | 5.73<br>(5.15 to 6.38)       | 5.21<br>(4.62 to 5.93)       | 3.55<br>(3.12 to 4.05)       | 2.82<br>(2.48 to 3.25)       | 2.34<br>(2.02 to 2.68)    | 1.98<br>(1.73 to 2.29)    |
| Ireland                   | 20.12<br>(19.28 to 21.00)    | 18.04<br>(17.31 to 18.85)    | 12.58<br>(12.01 to 13.18)    | 9.49<br>(9.18 to 9.84)       | 8.23<br>(7.82 to 8.68)       | 6.57<br>(6.18 to 6.99)       | 5.73<br>(6.11 to 6.90)       | 4.53<br>(4.23 to 4.82)       | 3.80<br>(3.57 to 4.05)    | 3.54<br>(3.14 to 4.02)    |
| Israel                    | 29.34<br>(26.58 to 32.47)    | 27.48<br>(26.62 to 28.38)    | 15.94<br>(15.29 to 16.58)    | 12.75<br>(12.19 to 13.30)    | 10.91<br>(10.49 to 11.34)    | 8.16<br>(7.83 to 8.52)       | 6.55<br>(6.29 to 6.83)       | 5.27<br>(5.04 to 5.50)       | 4.30<br>(4.11 to 4.51)    | 3.33<br>(2.92 to 3.81)    |
| Italy                     | 29.45<br>(28.84 to 30.00)    | 20.70<br>(20.30 to 21.13)    | 14.65<br>(14.26 to 15.05)    | 10.63<br>(10.34 to 10.92)    | 8.36<br>(8.11 to 8.62)       | 6.77<br>(6.55 to 6.98)       | 4.95<br>(4.87 to 5.03)       | 3.93<br>(3.79 to 4.10)       | 2.92<br>(3.52 to 3.80)    | 2.92<br>(2.36 to 3.60)    |
| Luxembourg                | 20.18<br>(18.92 to 21.55)    | 14.10<br>(13.12 to 15.11)    | 11.37<br>(10.68 to 12.08)    | 9.55<br>(8.65 to 10.54)      | 7.68<br>(6.90 to 8.47)       | 5.17<br>(4.67 to 5.75)       | 4.13<br>(3.79 to 4.54)       | 3.02<br>(2.66 to 3.45)       | 2.69<br>(2.33 to 3.12)    | 1.98<br>(1.81 to 2.18)    |
| Malta                     | 24.40<br>(22.76 to 26.23)    | 17.74<br>(17.09 to 18.41)    | 13.90<br>(12.92 to 15.01)    | 11.75<br>(10.85 to 12.64)    | 8.91<br>(8.17 to 9.73)       | 7.26<br>(7.53 to 9.00)       | 6.82<br>(6.09 to 7.56)       | 6.48<br>(5.78 to 7.28)       | 6.72<br>(6.03 to 7.45)    | 5.87<br>(5.30 to 6.52)    |
| Netherlands               | 14.04<br>(13.63 to 14.46)    | 11.94<br>(11.57 to 12.33)    | 9.41<br>(9.09 to 9.76)       | 8.54<br>(8.22 to 8.88)       | 7.54<br>(7.26 to 7.85)       | 6.14<br>(5.91 to 6.41)       | 5.62<br>(5.41 to 5.85)       | 4.94<br>(4.74 to 5.14)       | 3.97<br>(3.78 to 4.15)    | 3.41<br>(3.15 to 3.70)    |
| Norway                    | 14.18<br>(13.56 to 14.79)    | 11.65<br>(11.12 to 12.21)    | 8.72<br>(8.24 to 9.27)       | 7.76<br>(8.31 to 9.24)       | 7.37<br>(6.99 to 7.76)       | 4.81<br>(4.54 to 5.11)       | 4.30<br>(4.03 to 4.57)       | 3.50<br>(3.29 to 3.73)       | 2.84<br>(2.63 to 3.04)    | 2.37<br>(2.06 to 2.75)    |
| Portugal                  | 58.99<br>(57.81 to 60.21)    | 39.01<br>(38.30 to 39.74)    | 25.76<br>(25.34 to 26.24)    | 18.16<br>(17.79 to 18.53)    | 12.42<br>(12.14 to 12.73)    | 8.52<br>(8.31 to 8.73)       | 6.22<br>(6.07 to 6.38)       | 4.46<br>(4.32 to 4.61)       | 3.38<br>(3.25 to 3.51)    | 2.79<br>(2.65 to 2.94)    |
| Spain                     | 28.08<br>(27.46 to 28.70)    | 19.15<br>(18.71 to 19.57)    | 13.24<br>(12.93 to 13.60)    | 9.74<br>(9.47 to 10.04)      | 8.35<br>(8.08 to 8.64)       | 6.19<br>(5.95 to 6.42)       | 4.84<br>(4.66 to 5.03)       | 4.14<br>(3.98 to 4.32)       | 3.58<br>(3.43 to 3.73)    | 3.01<br>(2.70 to 3.37)    |
| Sweden                    | 11.54<br>(11.00 to 12.07)    | 9.06<br>(8.59 to 9.55)       | 7.07<br>(6.68 to 7.51)       | 6.24<br>(5.85 to 6.62)       | 6.06<br>(5.72 to 6.41)       | 4.20<br>(3.92 to 4.47)       | 3.48<br>(3.23 to 3.74)       | 2.98<br>(2.76 to 3.20)       | 2.77<br>(2.55 to 3.00)    | 2.33<br>(1.93 to 2.80)    |
| Stockholm                 | 11.39<br>(8.60 to 15.04)     | 9.16<br>(6.76 to 12.06)      | 7.47<br>(6.59 to 8.43)       | 6.09<br>(5.41 to 6.80)       | 5.91<br>(5.35 to 6.47)       | 4.28<br>(3.78 to 4.81)       | 3.44<br>(3.03 to 3.86)       | 2.89<br>(2.55 to 3.27)       | 2.26<br>(2.00 to 2.54)    | 2.02<br>(1.63 to 2.48)    |
| Sweden except Stockholm   | 11.84<br>(11.02 to 12.65)    | 9.16<br>(8.53 to 9.80)       | 7.05<br>(6.62 to 7.50)       | 6.25<br>(5.89 to 6.64)       | 6.06<br>(5.69 to 6.43)       | 4.15<br>(3.89 to 4.41)       | 3.47<br>(3.23 to 3.70)       | 2.97<br>(2.75 to 3.19)       | 2.87<br>(2.67 to 3.06)    | 2.39<br>(1.93 to 2.94)    |
| Switzerland               | 15.77<br>(15.21 to 16.33)    | 11.68<br>(11.22 to 12.14)    | 8.93<br>(8.56 to 9.34)       | 7.70<br>(7.34 to 8.08)       | 7.40<br>(7.04 to 7.73)       | 5.53<br>(5.24 to 5.82)       | 5.13<br>(4.89 to 5.36)       | 4.52<br>(4.24 to 4.79)       | 4.10<br>(3.88 to 4.35)    | 3.57<br>(3.11 to 4.12)    |
| United Kingdom            | 18.91<br>(18.56 to 19.28)    | 16.07<br>(15.74 to 16.38)    | 12.71<br>(12.45 to 12.99)    | 9.92<br>(9.68 to 10.16)      | 8.30<br>(8.11 to 8.49)       | 6.48<br>(6.32 to 6.64)       | 5.90<br>(5.74 to 6.07)       | 5.31<br>(5.20 to 5.43)       | 4.61<br>(4.47 to 4.73)    | 4.08<br>(3.83 to 4.38)    |
| England                   | 18.33<br>(17.80 to 18.81)    | 15.51<br>(15.10 to 15.91)    | 12.38<br>(12.10 to 12.69)    | 9.76<br>(9.57 to 9.95)       | 8.34<br>(8.17 to 8.52)       | 6.44<br>(6.29 to 6.59)       | 5.93<br>(5.76 to 6.13)       | 5.32<br>(5.19 to 5.44)       | 4.63<br>(4.51 to 4.76)    | 4.12<br>(3.82 to 4.44)    |
| East Midlands             | 17.52<br>(16.28 to 18.80)    | 14.83<br>(13.98 to 15.68)    | 11.83<br>(11.00 to 12.58)    | 9.07<br>(8.59 to 9.59)       | 8.22<br>(7.80 to 8.64)       | 6.13<br>(5.79 to 6.47)       | 5.68<br>(5.31 to 6.07)       | 5.13<br>(4.83 to 5.44)       | 4.47<br>(4.20 to 4.73)    | 4.40<br>(3.95 to 4.88)    |
| East of England           | 16.36<br>(14.04 to 18.85)    | 13.49<br>(11.97 to 15.06)    | 10.63<br>(9.66 to 11.63)     | 8.41<br>(8.00 to 8.83)       | 6.49<br>(6.12 to 6.86)       | 5.46<br>(5.14 to 5.82)       | 4.71<br>(4.45 to 4.99)       | 4.37<br>(4.09 to 4.66)       | 3.97<br>(3.69 to 4.25)    | 3.49                      |

Appendix Table 11C. Under-5 mortality rates by location, females, 1970, 1975, 1980, 1985, 1990, 1995, 2000, 2005, 2010, 2016

| Location                                         | 1970                         | 1975                         | 1980                         | 1985                        | 1990                       | 1995                      | 2000                      | 2005                      | 2010                      | 2016                      |
|--------------------------------------------------|------------------------------|------------------------------|------------------------------|-----------------------------|----------------------------|---------------------------|---------------------------|---------------------------|---------------------------|---------------------------|
| Northern Ireland                                 | 24.43<br>(22.96 to 25.93)    | 19.25<br>(18.08 to 20.45)    | 14.11<br>(13.08 to 15.09)    | 10.64<br>(9.81 to 11.60)    | 8.29<br>(7.58 to 9.04)     | 7.21<br>(6.56 to 7.87)    | 5.75<br>(5.18 to 6.37)    | 5.79<br>(5.24 to 6.39)    | 5.25<br>(4.74 to 5.81)    | 4.23<br>(2.96 to 5.89)    |
| Scotland                                         | 19.82<br>(19.18 to 20.50)    | 17.37<br>(16.71 to 18.03)    | 12.36<br>(11.83 to 12.90)    | 9.95<br>(9.47 to 10.40)     | 8.16<br>(7.73 to 8.60)     | 6.45<br>(6.07 to 6.84)    | 5.64<br>(5.29 to 5.98)    | 5.18<br>(4.86 to 5.50)    | 3.99<br>(3.72 to 4.24)    | 3.60<br>(2.88 to 4.47)    |
| Wales                                            | 19.91<br>(15.17 to 26.00)    | 17.06<br>(12.98 to 22.04)    | 13.63<br>(12.03 to 15.49)    | 10.06<br>(9.42 to 10.73)    | 7.54<br>(7.05 to 8.03)     | 6.19<br>(5.78 to 6.62)    | 5.50<br>(5.10 to 5.91)    | 4.55<br>(4.20 to 4.92)    | 4.09<br>(3.77 to 4.42)    | 3.81<br>(3.10 to 4.61)    |
| Southern Latin America                           | 78.91<br>(78.17 to 79.61)    | 61.49<br>(60.89 to 62.03)    | 39.04<br>(38.76 to 39.34)    | 28.94<br>(28.72 to 29.16)   | 25.46<br>(25.25 to 25.67)  | 20.87<br>(20.67 to 21.08) | 15.86<br>(15.73 to 16.00) | 13.03<br>(12.91 to 13.15) | 11.38<br>(11.23 to 11.54) | 9.86<br>(9.52 to 10.24)   |
| Argentina                                        | 76.66<br>(75.77 to 77.57)    | 60.89<br>(60.22 to 61.55)    | 39.95<br>(39.52 to 40.42)    | 31.27<br>(30.96 to 31.59)   | 29.09<br>(28.74 to 29.43)  | 24.87<br>(24.60 to 25.16) | 18.24<br>(18.03 to 18.45) | 14.62<br>(14.45 to 14.80) | 12.55<br>(12.39 to 12.72) | 10.90<br>(10.61 to 11.22) |
| Chile                                            | 89.91<br>(88.30 to 91.49)    | 64.93<br>(63.71 to 66.17)    | 36.03<br>(35.30 to 36.77)    | 22.45<br>(21.96 to 22.91)   | 18.14<br>(17.76 to 18.54)  | 12.70<br>(12.46 to 12.96) | 9.97<br>(9.74 to 10.21)   | 8.48<br>(8.29 to 8.67)    | 8.27<br>(8.05 to 8.53)    | 7.18<br>(6.97 to 7.41)    |
| Uruguay                                          | 49.74<br>(48.33 to 51.27)    | 53.46<br>(51.98 to 55.02)    | 41.85<br>(40.36 to 43.27)    | 32.78<br>(31.44 to 34.04)   | 22.63<br>(21.71 to 23.64)  | 19.12<br>(18.28 to 19.92) | 13.88<br>(13.22 to 14.54) | 12.28<br>(11.69 to 12.95) | 9.33<br>(8.28 to 10.62)   | 7.55<br>(5.85 to 9.71)    |
| Central Europe, Eastern Europe, and Central Asia | 48.13<br>(43.44 to 53.40)    | 40.64<br>(38.46 to 42.90)    | 36.24<br>(34.70 to 37.98)    | 32.43<br>(31.20 to 33.69)   | 28.66<br>(27.60 to 29.74)  | 29.57<br>(28.06 to 31.13) | 24.75<br>(23.27 to 26.39) | 19.10<br>(17.46 to 20.94) | 14.66<br>(12.92 to 16.65) | 11.81<br>(9.58 to 14.76)  |
| Eastern Europe                                   | 28.26<br>(25.03 to 32.46)    | 27.57<br>(25.21 to 30.65)    | 25.48<br>(23.97 to 27.17)    | 22.11<br>(21.15 to 23.23)   | 18.22<br>(17.41 to 19.11)  | 19.42<br>(18.40 to 20.54) | 17.14<br>(16.11 to 18.37) | 11.98<br>(11.27 to 12.84) | 8.62<br>(8.04 to 9.32)    | 7.29<br>(6.73 to 8.07)    |
| Belarus                                          | 31.05<br>(24.95 to 38.07)    | 25.77<br>(21.06 to 31.33)    | 22.37<br>(18.48 to 26.68)    | 20.28<br>(16.97 to 24.29)   | 17.40<br>(14.53 to 20.79)  | 15.81<br>(13.09 to 18.96) | 13.56<br>(11.13 to 16.33) | 9.82<br>(7.92 to 11.97)   | 6.73<br>(5.26 to 8.60)    | 4.71<br>(3.59 to 6.29)    |
| Estonia                                          | 18.32<br>(17.08 to 19.71)    | 18.37<br>(17.21 to 19.59)    | 18.82<br>(17.62 to 20.07)    | 16.90<br>(15.78 to 18.09)   | 14.19<br>(13.21 to 15.23)  | 15.69<br>(14.45 to 17.02) | 9.59<br>(8.62 to 10.51)   | 6.28<br>(5.63 to 6.95)    | 4.26<br>(3.71 to 4.85)    | 2.87<br>(2.17 to 3.70)    |
| Latvia                                           | 18.36<br>(17.28 to 19.64)    | 21.75<br>(20.53 to 23.22)    | 18.17<br>(17.02 to 19.35)    | 14.84<br>(13.85 to 15.95)   | 15.15<br>(14.16 to 16.15)  | 18.52<br>(17.35 to 19.83) | 11.87<br>(11.07 to 12.78) | 8.88<br>(7.95 to 9.85)    | 7.10<br>(6.36 to 7.95)    | 4.38<br>(3.25 to 5.84)    |
| Lithuania                                        | 20.09<br>(19.20 to 21.04)    | 20.75<br>(19.85 to 21.68)    | 16.68<br>(15.90 to 17.48)    | 16.42<br>(15.63 to 17.24)   | 12.02<br>(11.43 to 12.63)  | 13.89<br>(13.20 to 14.64) | 9.83<br>(9.22 to 10.39)   | 7.70<br>(7.18 to 8.21)    | 5.28<br>(4.89 to 5.74)    | 4.21<br>(3.81 to 4.67)    |
| Moldova                                          | 63.52<br>(42.64 to 90.90)    | 55.00<br>(38.02 to 77.36)    | 49.58<br>(38.98 to 61.94)    | 37.94<br>(30.90 to 45.58)   | 28.18<br>(22.86 to 33.89)  | 30.97<br>(25.60 to 37.22) | 27.63<br>(22.31 to 33.59) | 14.57<br>(11.15 to 18.58) | 13.89<br>(10.52 to 17.90) | 10.00<br>(6.58 to 14.53)  |
| Russia                                           | 24.35<br>(24.12 to 24.59)    | 25.76<br>(25.51 to 26.03)    | 24.37<br>(24.07 to 24.68)    | 22.44<br>(22.12 to 22.72)   | 18.35<br>(18.17 to 18.53)  | 19.91<br>(19.64 to 20.19) | 17.16<br>(16.79 to 17.53) | 11.85<br>(11.72 to 12.00) | 8.39<br>(8.30 to 8.50)    | 7.33<br>(7.08 to 7.63)    |
| Ukraine                                          | 35.63<br>(23.18 to 51.40)    | 31.00<br>(21.51 to 42.72)    | 27.75<br>(21.49 to 35.32)    | 20.59<br>(16.60 to 25.53)   | 17.61<br>(14.23 to 21.40)  | 18.14<br>(14.54 to 22.40) | 17.98<br>(13.97 to 22.85) | 13.23<br>(10.16 to 17.15) | 9.77<br>(7.15 to 12.82)   | 7.95<br>(4.93 to 12.20)   |
| Central Europe                                   | 40.19<br>(37.51 to 43.44)    | 30.47<br>(28.61 to 32.65)    | 25.28<br>(24.12 to 26.54)    | 21.76<br>(21.04 to 22.51)   | 19.34<br>(18.88 to 19.86)  | 16.79<br>(16.36 to 17.25) | 12.22<br>(11.80 to 12.70) | 9.37<br>(9.09 to 9.65)    | 7.03<br>(6.83 to 7.24)    | 5.51<br>(4.64 to 6.65)    |
| Albania                                          | 111.13<br>(77.57 to 156.98)  | 79.24<br>(55.83 to 109.05)   | 61.61<br>(46.97 to 78.94)    | 53.09<br>(44.65 to 63.08)   | 38.63<br>(32.81 to 45.29)  | 35.09<br>(29.55 to 41.37) | 25.88<br>(20.83 to 30.87) | 19.88<br>(15.45 to 24.97) | 15.49<br>(10.93 to 21.16) | 12.11<br>(8.48 to 17.15)  |
| Bosnia and Herzegovina                           | 49.28<br>(35.91 to 67.47)    | 38.49<br>(29.74 to 49.67)    | 29.21<br>(23.99 to 34.93)    | 21.55<br>(20.74 to 22.42)   | 14.25<br>(13.67 to 14.79)  | 20.60<br>(18.07 to 23.51) | 9.34<br>(8.87 to 9.86)    | 7.40<br>(6.96 to 7.86)    | 5.86<br>(5.49 to 6.23)    | 4.50<br>(3.87 to 5.20)    |
| Bulgaria                                         | 28.57<br>(27.72 to 29.44)    | 24.23<br>(23.46 to 25.07)    | 21.37<br>(20.69 to 22.07)    | 16.52<br>(15.90 to 17.13)   | 16.14<br>(15.48 to 16.80)  | 16.06<br>(15.33 to 16.79) | 14.50<br>(13.76 to 15.26) | 11.32<br>(10.68 to 11.96) | 9.84<br>(9.31 to 10.41)   | 7.31<br>(5.03 to 10.45)   |
| Croatia                                          | 31.55<br>(23.24 to 42.66)    | 24.84<br>(19.07 to 31.77)    | 19.71<br>(16.45 to 23.33)    | 15.76<br>(14.98 to 16.60)   | 10.92<br>(10.38 to 11.50)  | 10.73<br>(9.52 to 12.05)  | 8.05<br>(7.60 to 8.52)    | 6.17<br>(5.74 to 6.61)    | 4.97<br>(4.02 to 5.34)    | 4.05<br>(3.42 to 4.74)    |
| Czech Republic                                   | 20.53<br>(19.88 to 21.24)    | 18.60<br>(18.05 to 19.16)    | 15.71<br>(15.22 to 16.25)    | 12.21<br>(11.73 to 12.68)   | 10.10<br>(9.70 to 10.54)   | 7.75<br>(7.35 to 8.17)    | 4.65<br>(4.33 to 4.98)    | 3.70<br>(3.45 to 3.97)    | 3.02<br>(2.81 to 3.24)    | 2.43<br>(2.08 to 2.86)    |
| Hungary                                          | 35.61<br>(34.37 to 36.92)    | 32.71<br>(31.61 to 33.83)    | 21.97<br>(21.21 to 22.78)    | 19.91<br>(19.16 to 20.73)   | 15.18<br>(14.54 to 15.93)  | 11.27<br>(10.68 to 11.87) | 9.48<br>(8.94 to 10.02)   | 6.72<br>(6.29 to 7.14)    | 5.61<br>(5.21 to 6.02)    | 4.94<br>(4.12 to 5.96)    |
| Macedonia                                        | 67.44<br>(37.86 to 109.57)   | 54.49<br>(30.81 to 88.34)    | 51.02<br>(35.92 to 71.32)    | 40.15<br>(28.85 to 54.30)   | 33.24<br>(31.72 to 34.75)  | 21.75<br>(20.51 to 22.97) | 13.04<br>(12.14 to 13.97) | 12.50<br>(11.56 to 13.51) | 8.77<br>(8.00 to 9.63)    | 9.10<br>(5.77 to 13.83)   |
| Montenegro                                       | 30.87<br>(20.68 to 44.93)    | 25.73<br>(17.76 to 38.09)    | 21.19<br>(14.40 to 30.70)    | 15.72<br>(11.51 to 24.26)   | 13.60<br>(10.09 to 17.81)  | 13.63<br>(12.06 to 15.30) | 14.82<br>(13.36 to 16.35) | 9.35<br>(8.51 to 10.28)   | 8.96<br>(5.29 to 6.69)    | 4.44<br>(3.40 to 5.68)    |
| Poland                                           | 33.35<br>(32.56 to 34.16)    | 24.51<br>(24.00 to 25.06)    | 21.01<br>(20.51 to 21.49)    | 18.30<br>(17.83 to 18.80)   | 16.21<br>(15.78 to 16.66)  | 14.38<br>(13.92 to 14.86) | 6.60<br>(6.27 to 6.95)    | 6.71<br>(6.45 to 7.00)    | 5.33<br>(5.09 to 5.57)    | 4.13<br>(2.94 to 5.74)    |
| Romania                                          | 51.52<br>(50.66 to 52.36)    | 37.13<br>(36.45 to 37.80)    | 31.22<br>(30.66 to 31.81)    | 28.13<br>(27.55 to 28.69)   | 20.73<br>(29.84 to 31.07)  | 23.05<br>(22.49 to 23.66) | 20.73<br>(20.14 to 21.32) | 16.12<br>(15.62 to 16.65) | 11.74<br>(11.34 to 12.17) | 8.35<br>(7.16 to 9.70)    |
| Serbia                                           | 39.49<br>(26.25 to 56.70)    | 32.05<br>(21.98 to 45.83)    | 27.51<br>(19.02 to 38.09)    | 23.63<br>(16.93 to 31.72)   | 17.51<br>(13.54 to 22.41)  | 19.21<br>(18.52 to 19.93) | 13.15<br>(10.89 to 15.85) | 10.63<br>(8.82 to 12.76)  | 8.81<br>(8.40 to 9.26)    | 6.82<br>(5.70 to 8.04)    |
| Slovakia                                         | 26.66<br>(25.55 to 27.77)    | 23.98<br>(23.25 to 24.82)    | 20.32<br>(19.52 to 21.19)    | 15.96<br>(15.19 to 16.74)   | 12.35<br>(11.69 to 13.04)  | 10.95<br>(10.32 to 11.63) | 7.66<br>(8.14 to 9.46)    | 5.86<br>(7.11 to 8.27)    | 5.46<br>(5.45 to 6.30)    | 4.66<br>(4.26 to 6.99)    |
| Slovenia                                         | 24.97<br>(18.49 to 33.09)    | 19.44<br>(15.43 to 24.40)    | 15.49<br>(13.52 to 17.64)    | 12.84<br>(12.12 to 13.55)   | 8.64<br>(8.10 to 9.19)     | 6.13<br>(5.69 to 6.63)    | 4.71<br>(4.29 to 5.13)    | 3.83<br>(3.50 to 4.16)    | 2.85<br>(2.59 to 3.13)    | 2.11<br>(1.79 to 2.45)    |
| Central Asia                                     | 99.88<br>(86.37 to 115.39)   | 83.07<br>(76.31 to 89.72)    | 72.11<br>(67.70 to 76.87)    | 63.17<br>(59.71 to 66.83)   | 53.43<br>(50.03 to 57.09)  | 53.06<br>(49.40 to 57.59) | 44.80<br>(40.93 to 49.29) | 35.80<br>(30.91 to 41.33) | 27.77<br>(22.74 to 33.74) | 21.33<br>(15.69 to 28.47) |
| Armenia                                          | 102.69<br>(75.19 to 137.65)  | 78.17<br>(61.15 to 98.31)    | 63.58<br>(53.77 to 74.55)    | 51.35<br>(44.52 to 58.91)   | 40.90<br>(35.33 to 47.01)  | 38.41<br>(33.16 to 44.25) | 26.92<br>(22.82 to 31.68) | 20.68<br>(16.61 to 25.36) | 14.78<br>(11.42 to 18.67) | 10.52<br>(7.78 to 13.93)  |
| Azerbaijan                                       | 122.78<br>(90.44 to 159.64)  | 92.90<br>(69.53 to 120.93)   | 86.04<br>(69.34 to 106.40)   | 81.25<br>(67.35 to 94.94)   | 71.64<br>(59.65 to 84.30)  | 69.55<br>(58.94 to 82.31) | 57.25<br>(48.35 to 68.59) | 46.73<br>(38.01 to 56.52) | 35.05<br>(26.16 to 45.28) | 27.09<br>(20.17 to 35.77) |
| Georgia                                          | 93.64<br>(73.10 to 117.61)   | 70.39<br>(58.12 to 83.93)    | 52.56<br>(46.60 to 59.57)    | 42.35<br>(37.64 to 47.08)   | 37.29<br>(33.58 to 41.67)  | 37.46<br>(33.62 to 41.85) | 33.23<br>(29.47 to 37.35) | 33.23<br>(20.26 to 28.41) | 33.23<br>(14.20 to 22.41) | 33.23<br>(10.09 to 17.50) |
| Kazakhstan                                       | 55.95<br>(43.41 to 70.17)    | 49.40<br>(42.40 to 57.14)    | 43.22<br>(37.22 to 49.20)    | 36.83<br>(32.51 to 41.52)   | 32.44<br>(28.62 to 36.21)  | 35.43<br>(30.75 to 40.64) | 32.28<br>(26.85 to 38.06) | 25.50<br>(20.46 to 31.37) | 17.47<br>(13.88 to 21.46) | 11.60<br>(8.64 to 15.31)  |
| Kyrgyzstan                                       | 125.15<br>(108.35 to 143.59) | 102.71<br>(92.61 to 113.34)  | 86.70<br>(79.93 to 93.68)    | 73.67<br>(68.91 to 78.31)   | 59.48<br>(55.57 to 63.43)  | 50.39<br>(47.02 to 53.99) | 44.53<br>(41.15 to 47.84) | 37.24<br>(34.43 to 40.15) | 31.46<br>(28.38 to 34.66) | 25.44<br>(21.51 to 29.95) |
| Mongolia                                         | 142.30<br>(121.15 to 164.82) | 127.19<br>(112.18 to 143.24) | 115.68<br>(103.48 to 128.14) | 101.27<br>(91.86 to 110.87) | 84.10<br>(76.27 to 91.64)  | 67.99<br>(62.30 to 73.74) | 51.49<br>(46.94 to 56.34) | 35.94<br>(31.97 to 40.01) | 25.29<br>(21.99 to 29.08) | 17.99<br>(14.48 to 22.21) |
| Tajikistan                                       | 192.57<br>(144.73 to 247.08) | 171.66<br>(139.72 to 207.59) | 137.69<br>(115.83 to 159.83) | 111.24<br>(96.79 to 126.76) | 91.91<br>(78.34 to 106.33) | 85.63<br>(72.67 to 98.66) | 69.46<br>(59.22 to 81.73) | 47.23<br>(39.04 to 56.59) | 38.70<br>(30.51 to 48.20) | 32.77<br>(23.19 to 45.12) |
| Turkmenistan                                     | 166.43<br>(121.59 to 217.37) | 138.08<br>(100.45 to 182.47) | 114.69<br>(91.58 to 141.35)  | 96.95<br>(80.74 to 114.75)  | 82.92<br>(70.52 to 95.62)  | 77.97<br>(65.81 to 92.52) | 69.78<br>(56.58 to 85.37) | 55.97<br>(41.39 to 72.02) | 42.89<br>(30.56 to 57.85) | 31.65<br>(21.37 to 45.16) |
| Uzbekistan                                       | 85.86<br>(64.95 to 113.35)   | 69.36<br>(56.85 to 82.59)    | 62.06<br>(52.89 to 71.75)    | 55.33<br>(47.84 to 63.59)   | 43.72<br>(37.74 to 50.14)  | 45.61<br>(39.87 to 52.50) | 37.80<br>(31.83 to 44.76) | 33.20<br>(25.03 to 43.04) | 26.76<br>(19.53 to 36.00) | 20.32<br>(14.51 to 27.80) |
| Latin America and Caribbean                      | 109.84<br>(103.64 to 116.15) | 91.59<br>(87.32 to 96.60)    | 73.45<br>(69.90 to 77.24)    | 60.04<br>(57.45 to 63.02)   | 47.62<br>(45.71 to 49.57)  | 38.15<br>(36.24 to 40.27) | 29.95<br>(27.89 to 32.03) | 24.96<br>(23.25 to 26.85) | 23.29<br>(20.23 to 26.95) | 16.69<br>(13.23 to 20.91) |
| Central Latin America                            | 99.98<br>(96.43 to 103.50)   | 82.36<br>(79.19 to 85.78)    | 63.45<br>(60.48 to 66.55)    | 50.09<br>(47.62 to 52.59)   | 39.42<br>(37.33 to 41.47)  | 32.31<br>(30.47 to 34.30) | 25.90<br>(23.94 to 27.77) | 21.45<br>(19.58 to 23.37) | 18.05<br>(15.97 to 20.31) | 14.85<br>(12.48 to 17.74) |
| Colombia                                         | 89.90<br>(84.00 to 96.16)    | 71.16<br>(66.43 to 76.04)    | 49.96<br>(46.22 to 54.07)    | 40.47<br>(37.04 to 44.26)   | 30.74<br>(28.14 to 33.45)  | 27.66<br>(25.23 to 30.34) | 23.96<br>(21.48 to 26.62) | 21.31<br>(18.82 to 24.19) | 17.78<br>(15.11 to 21.02) | 13.72<br>(11.24 to 16.75) |
| Costa Rica                                       | 64.81<br>(60.64 to 69.11)    | 43.88<br>(40.60 to 47.17)    | 28.43<br>(25.73 to 31.23)    | 21.24<br>(18.81 to 23.95)   | 17.60<br>(15.32 to 20.18)  | 15.32<br>(13.04 to 18.07) | 13.66<br>(11.46 to 16.39) | 12.40<br>(10.30 to 14.96) | 11.18<br>(9.12 to 13.51)  | 9.48<br>(7.45 to 12.05)   |
| El Salvador                                      | 138.94<br>(123.40 to 154.51) | 109.72<br>(98.20 to 121.45)  | 87.92<br>(79.59 to 97.59)    | 70.65<br>(63.88 to 77.74)   | 48.85<br>(44.04 to 54.45)  | 35.63<br>(31.51 to 39.84) | 26.36<br>(23.38 to 29.89) | 18.55<br>(15.74           |                           |                           |

Appendix Table 11C. Under-5 mortality rates by location, females, 1970, 1975, 1980, 1985, 1990, 1995, 2000, 2005, 2010, 2016

| Location                               | 1970                         | 1975                         | 1980                         | 1985                         | 1990                         | 1995                         | 2000                         | 2005                        | 2010                      | 2016                      |
|----------------------------------------|------------------------------|------------------------------|------------------------------|------------------------------|------------------------------|------------------------------|------------------------------|-----------------------------|---------------------------|---------------------------|
| Venezuela                              | 65.15<br>(64.54 to 65.77)    | 56.39<br>(55.81 to 56.94)    | 37.95<br>(37.56 to 38.36)    | 29.61<br>(29.29 to 29.92)    | 25.69<br>(25.43 to 25.97)    | 24.80<br>(24.52 to 25.09)    | 19.00<br>(18.78 to 19.21)    | 16.20<br>(16.02 to 16.37)   | 15.02<br>(14.91 to 15.14) | 14.91<br>(14.31 to 15.57) |
| Andean Latin America                   | 186.23<br>(174.28 to 199.33) | 144.15<br>(138.65 to 150.37) | 117.93<br>(111.83 to 124.07) | 95.21<br>(91.62 to 98.87)    | 74.21<br>(71.60 to 77.06)    | 56.14<br>(54.21 to 58.11)    | 40.95<br>(39.01 to 42.97)    | 31.65<br>(29.91 to 33.46)   | 24.12<br>(21.65 to 26.77) | 17.98<br>(14.68 to 21.96) |
| Bolivia                                | 222.15<br>(208.19 to 236.12) | 185.24<br>(173.94 to 196.47) | 153.22<br>(146.48 to 160.36) | 130.35<br>(126.27 to 134.75) | 109.31<br>(102.57 to 116.02) | 87.83<br>(81.99 to 93.44)    | 68.30<br>(63.18 to 73.64)    | 53.97<br>(48.92 to 59.10)   | 41.70<br>(35.62 to 48.31) | 30.27<br>(24.32 to 37.67) |
| Ecuador                                | 124.83<br>(117.78 to 131.67) | 99.22<br>(93.93 to 104.12)   | 74.59<br>(71.17 to 78.16)    | 57.13<br>(54.64 to 59.90)    | 45.11<br>(42.91 to 47.47)    | 36.60<br>(34.18 to 39.15)    | 30.15<br>(27.61 to 32.96)    | 24.57<br>(22.04 to 27.35)   | 19.57<br>(17.02 to 22.37) | 15.51<br>(12.98 to 18.59) |
| Peru                                   | 200.01<br>(177.42 to 224.20) | 149.06<br>(139.27 to 158.91) | 125.48<br>(117.00 to 134.54) | 100.89<br>(94.78 to 106.83)  | 75.60<br>(70.92 to 80.69)    | 53.76<br>(50.62 to 57.20)    | 34.90<br>(32.58 to 37.40)    | 25.47<br>(23.70 to 27.36)   | 19.12<br>(17.40 to 20.96) | 14.37<br>(11.73 to 17.65) |
| Caribbean                              | 101.72<br>(94.99 to 109.06)  | 91.17<br>(84.90 to 97.79)    | 85.30<br>(78.19 to 93.60)    | 74.37<br>(68.48 to 81.25)    | 64.25<br>(58.67 to 70.36)    | 56.28<br>(51.57 to 62.15)    | 46.58<br>(41.83 to 51.82)    | 44.75<br>(40.60 to 49.19)   | 37.77<br>(34.50 to 41.60) | 30.73<br>(21.87 to 42.58) |
| Antigua and Barbuda                    | 30.22<br>(23.87 to 37.65)    | 24.27<br>(17.54 to 32.16)    | 18.14<br>(12.74 to 24.75)    | 12.57<br>(8.89 to 17.21)     | 12.45<br>(8.88 to 16.72)     | 14.23<br>(10.15 to 18.48)    | 13.55<br>(10.38 to 17.72)    | 11.85<br>(9.01 to 15.78)    | 10.19<br>(7.50 to 14.30)  | 9.10<br>(6.26 to 13.22)   |
| The Bahamas                            | 44.08<br>(29.14 to 63.29)    | 36.95<br>(25.43 to 51.33)    | 30.65<br>(20.06 to 45.80)    | 25.28<br>(15.71 to 37.88)    | 20.84<br>(12.72 to 32.07)    | 16.46<br>(10.60 to 24.24)    | 12.86<br>(8.63 to 18.40)     | 13.25<br>(9.32 to 17.93)    | 11.65<br>(7.65 to 17.17)  | 10.26<br>(5.41 to 19.19)  |
| Barbados                               | 41.13<br>(28.27 to 58.43)    | 29.37<br>(20.17 to 41.80)    | 22.20<br>(14.53 to 32.75)    | 18.75<br>(11.40 to 28.83)    | 16.86<br>(10.23 to 26.62)    | 17.03<br>(10.16 to 26.92)    | 17.86<br>(10.55 to 28.03)    | 16.50<br>(10.90 to 23.69)   | 14.28<br>(9.54 to 20.56)  | 14.27<br>(8.38 to 22.86)  |
| Belize                                 | 89.46<br>(70.74 to 110.19)   | 69.85<br>(56.99 to 85.43)    | 56.66<br>(45.86 to 67.63)    | 42.21<br>(34.72 to 50.40)    | 35.49<br>(29.22 to 42.70)    | 26.49<br>(20.93 to 33.44)    | 25.37<br>(19.50 to 31.62)    | 19.98<br>(14.77 to 27.07)   | 15.84<br>(11.19 to 21.75) | 13.46<br>(8.29 to 21.20)  |
| Bermuda                                | 25.12<br>(20.66 to 30.40)    | 20.91<br>(16.75 to 25.47)    | 20.14<br>(15.91 to 24.77)    | 13.62<br>(10.40 to 17.81)    | 11.30<br>(8.62 to 14.63)     | 8.61<br>(6.46 to 11.59)      | 3.93<br>(2.72 to 5.79)       | 5.42<br>(3.94 to 7.31)      | 4.14<br>(2.91 to 5.69)    | 3.33<br>(2.31 to 4.80)    |
| Cuba                                   | 36.80<br>(36.49 to 37.15)    | 26.84<br>(26.49 to 27.23)    | 21.00<br>(20.55 to 21.52)    | 16.53<br>(15.94 to 17.16)    | 12.12<br>(11.78 to 12.50)    | 9.75<br>(9.57 to 9.93)       | 7.51<br>(7.37 to 7.66)       | 6.27<br>(6.13 to 6.42)      | 5.31<br>(5.17 to 5.45)    | 4.65<br>(4.43 to 4.91)    |
| Dominica                               | 54.62<br>(39.85 to 71.27)    | 32.76<br>(23.25 to 44.25)    | 20.61<br>(14.22 to 28.10)    | 17.16<br>(11.81 to 23.72)    | 15.95<br>(11.11 to 22.18)    | 16.80<br>(11.94 to 22.60)    | 18.14<br>(13.01 to 24.48)    | 19.90<br>(14.68 to 27.14)   | 23.82<br>(17.11 to 33.67) | 25.05<br>(16.56 to 36.52) |
| Dominican Republic                     | 118.03<br>(106.78 to 129.78) | 99.16<br>(89.59 to 109.07)   | 80.04<br>(72.74 to 88.04)    | 66.59<br>(60.74 to 72.96)    | 55.09<br>(50.15 to 60.30)    | 42.07<br>(38.14 to 46.44)    | 33.35<br>(30.07 to 36.97)    | 32.86<br>(29.31 to 36.66)   | 28.83<br>(25.12 to 33.03) | 25.94<br>(18.99 to 30.03) |
| Grenada                                | 51.56<br>(31.57 to 78.66)    | 43.26<br>(25.35 to 66.34)    | 33.49<br>(17.39 to 59.22)    | 25.19<br>(12.83 to 46.08)    | 18.54<br>(10.51 to 31.09)    | 15.15<br>(9.28 to 22.57)     | 14.39<br>(9.20 to 21.06)     | 13.23<br>(8.18 to 19.99)    | 13.33<br>(8.84 to 19.55)  | 13.99<br>(7.80 to 24.95)  |
| Guayana                                | 81.39<br>(75.50 to 87.67)    | 70.50<br>(64.05 to 77.01)    | 58.04<br>(52.80 to 63.75)    | 51.47<br>(47.39 to 55.79)    | 46.40<br>(42.85 to 49.95)    | 39.79<br>(36.59 to 42.99)    | 34.54<br>(31.67 to 37.73)    | 32.89<br>(29.88 to 36.14)   | 28.86<br>(25.30 to 33.04) | 21.61<br>(17.28 to 26.98) |
| Haiti                                  | 241.88<br>(215.52 to 269.44) | 208.41<br>(187.54 to 232.52) | 186.04<br>(162.49 to 210.79) | 161.87<br>(143.34 to 183.05) | 140.36<br>(124.17 to 158.40) | 119.66<br>(105.02 to 135.98) | 94.66<br>(81.37 to 108.79)   | 83.77<br>(73.42 to 95.14)   | 78.33<br>(68.16 to 88.50) | 61.64<br>(50.73 to 73.95) |
| Jamaica                                | 53.78<br>(45.19 to 63.13)    | 44.30<br>(36.87 to 53.36)    | 37.72<br>(29.19 to 47.42)    | 32.26<br>(24.75 to 40.80)    | 28.71<br>(21.43 to 37.46)    | 25.27<br>(18.35 to 34.15)    | 23.04<br>(16.51 to 31.04)    | 20.62<br>(13.51 to 31.35)   | 20.39<br>(12.69 to 31.87) | 18.60<br>(11.74 to 28.56) |
| Puerto Rico                            | 26.94<br>(26.27 to 27.64)    | 19.99<br>(19.44 to 20.52)    | 17.72<br>(17.24 to 18.19)    | 15.69<br>(14.94 to 16.59)    | 14.03<br>(13.71 to 14.33)    | 13.39<br>(13.00 to 13.81)    | 11.11<br>(10.70 to 11.51)    | 9.31<br>(9.00 to 9.62)      | 7.86<br>(7.53 to 8.20)    | 5.88<br>(5.26 to 6.59)    |
| Saint Lucia                            | 56.99<br>(33.17 to 94.45)    | 38.52<br>(25.03 to 56.83)    | 26.46<br>(16.61 to 39.68)    | 21.22<br>(12.94 to 34.23)    | 18.46<br>(10.61 to 30.85)    | 16.95<br>(10.54 to 26.90)    | 16.32<br>(10.27 to 24.76)    | 18.23<br>(11.47 to 27.23)   | 18.52<br>(11.99 to 27.41) | 15.89<br>(8.66 to 27.45)  |
| Saint Vincent and the Grenadines       | 82.42<br>(54.82 to 115.62)   | 59.04<br>(38.08 to 84.01)    | 40.68<br>(26.62 to 58.20)    | 28.51<br>(18.32 to 42.06)    | 23.54<br>(15.39 to 34.38)    | 21.20<br>(14.23 to 29.42)    | 20.19<br>(14.32 to 27.54)    | 18.73<br>(13.46 to 25.37)   | 16.47<br>(11.64 to 23.05) | 13.97<br>(8.69 to 22.35)  |
| Suriname                               | 63.18<br>(52.77 to 75.44)    | 58.54<br>(49.89 to 68.21)    | 52.93<br>(45.85 to 60.33)    | 48.26<br>(42.65 to 54.53)    | 45.09<br>(39.23 to 51.99)    | 43.17<br>(37.19 to 49.78)    | 41.37<br>(34.74 to 48.70)    | 38.52<br>(31.36 to 46.50)   | 35.60<br>(28.33 to 43.69) | 31.74<br>(25.11 to 40.01) |
| Trinidad and Tobago                    | 47.34<br>(43.08 to 51.74)    | 42.37<br>(38.20 to 47.00)    | 33.27<br>(29.50 to 37.17)    | 26.55<br>(22.74 to 30.60)    | 24.52<br>(20.60 to 29.08)    | 23.89<br>(19.75 to 28.40)    | 24.21<br>(19.65 to 29.82)    | 21.52<br>(16.59 to 27.96)   | 19.59<br>(13.59 to 27.07) | 18.51<br>(11.11 to 29.62) |
| Virgin Islands, U.S.                   | 26.83<br>(24.41 to 29.14)    | 23.79<br>(21.64 to 26.08)    | 21.22<br>(19.52 to 22.97)    | 17.62<br>(16.42 to 18.83)    | 16.17<br>(14.84 to 17.63)    | 14.61<br>(13.29 to 16.01)    | 11.87<br>(10.75 to 13.18)    | 10.24<br>(9.07 to 11.54)    | 9.15<br>(7.91 to 10.50)   | 7.68<br>(6.34 to 9.32)    |
| Tropical Latin America                 | 103.51<br>(88.75 to 118.57)  | 88.38<br>(78.02 to 99.92)    | 70.16<br>(62.23 to 78.82)    | 58.86<br>(52.94 to 65.70)    | 46.42<br>(41.53 to 51.17)    | 36.31<br>(32.10 to 40.96)    | 28.17<br>(23.93 to 32.82)    | 22.94<br>(18.99 to 27.69)   | 18.62<br>(14.98 to 23.49) | 15.21<br>(11.59 to 19.75) |
| Brazil                                 | 102.24<br>(87.18 to 118.05)  | 88.13<br>(77.11 to 100.20)   | 70.67<br>(61.96 to 79.76)    | 58.93<br>(52.85 to 65.85)    | 46.50<br>(41.44 to 51.83)    | 36.45<br>(32.62 to 40.68)    | 27.98<br>(23.53 to 32.64)    | 22.48<br>(18.34 to 27.51)   | 18.23<br>(14.59 to 23.17) | 14.75<br>(11.14 to 19.29) |
| Paraguay                               | 64.40<br>(57.51 to 71.96)    | 55.94<br>(50.82 to 60.76)    | 46.96<br>(42.48 to 51.50)    | 38.92<br>(35.40 to 42.69)    | 29.42<br>(26.73 to 32.14)    | 25.34<br>(22.89 to 28.06)    | 25.48<br>(22.45 to 28.75)    | 23.58<br>(20.20 to 27.48)   | 20.32<br>(15.90 to 25.38) | 16.62<br>(12.89 to 21.36) |
| Southeast Asia, East Asia, and Oceania | 120.07<br>(110.51 to 129.86) | 98.15<br>(91.18 to 105.10)   | 80.42<br>(74.87 to 86.52)    | 66.77<br>(61.77 to 71.99)    | 55.38<br>(51.43 to 59.72)    | 46.84<br>(43.49 to 50.52)    | 38.27<br>(35.99 to 40.82)    | 28.26<br>(26.76 to 29.85)   | 21.25<br>(19.79 to 22.81) | 15.53<br>(13.82 to 17.53) |
| East Asia                              | 115.40<br>(103.20 to 128.23) | 91.94<br>(82.48 to 101.56)   | 75.40<br>(67.31 to 84.21)    | 62.07<br>(55.14 to 69.67)    | 51.29<br>(45.78 to 57.42)    | 43.90<br>(38.71 to 49.46)    | 35.03<br>(31.18 to 39.15)    | 22.30<br>(20.13 to 24.62)   | 15.49<br>(13.98 to 17.07) | 11.09<br>(9.54 to 13.12)  |
| China                                  | 117.97<br>(105.33 to 131.18) | 94.23<br>(84.49 to 104.20)   | 77.53<br>(69.03 to 86.74)    | 63.73<br>(56.58 to 71.62)    | 52.64<br>(46.93 to 58.90)    | 42.84<br>(38.29 to 47.91)    | 33.08<br>(29.52 to 36.72)    | 22.10<br>(19.84 to 24.56)   | 15.03<br>(13.52 to 16.64) | 10.52<br>(9.15 to 12.28)  |
| North Korea                            | 55.60<br>(43.78 to 69.17)    | 39.32<br>(30.41 to 48.49)    | 30.83<br>(23.94 to 38.72)    | 28.17<br>(22.22 to 35.03)    | 25.70<br>(19.80 to 32.66)    | 86.91<br>(35.71 to 159.09)   | 82.90<br>(39.34 to 138.87)   | 31.32<br>(24.95 to 39.23)   | 28.27<br>(22.39 to 35.60) | 23.76<br>(18.71 to 30.70) |
| Taiwan (Province of China)             | 26.26<br>(25.64 to 26.84)    | 18.27<br>(17.80 to 18.72)    | 14.43<br>(14.05 to 14.83)    | 10.11<br>(9.83 to 10.41)     | 7.99<br>(7.72 to 8.26)       | 8.16<br>(7.88 to 8.44)       | 7.91<br>(7.66 to 8.18)       | 6.35<br>(6.14 to 6.59)      | 4.97<br>(4.80 to 5.15)    | 4.32<br>(3.91 to 4.83)    |
| Southeast Asia                         | 133.78<br>(129.75 to 138.34) | 113.94<br>(108.22 to 120.08) | 90.86<br>(87.09 to 94.74)    | 76.13<br>(72.35 to 79.72)    | 63.21<br>(59.93 to 66.73)    | 51.29<br>(49.20 to 53.44)    | 42.09<br>(40.59 to 43.67)    | 34.46<br>(32.61 to 36.59)   | 26.97<br>(24.64 to 29.33) | 19.52<br>(16.89 to 22.56) |
| Cambodia                               | 187.48<br>(160.40 to 216.72) | 292.18<br>(183.38 to 405.07) | 146.51<br>(131.99 to 161.12) | 128.36<br>(119.20 to 138.26) | 109.44<br>(102.84 to 116.60) | 102.74<br>(96.40 to 109.16)  | 86.74<br>(80.58 to 92.90)    | 60.49<br>(55.00 to 66.54)   | 41.03<br>(36.18 to 46.27) | 27.94<br>(22.89 to 33.84) |
| Indonesia                              | 165.89<br>(160.28 to 171.26) | 139.58<br>(132.05 to 147.10) | 117.61<br>(112.01 to 123.27) | 98.39<br>(94.01 to 103.30)   | 78.84<br>(75.68 to 82.20)    | 60.91<br>(58.01 to 64.20)    | 47.72<br>(46.16 to 49.38)    | 37.40<br>(34.96 to 40.04)   | 29.37<br>(26.41 to 32.65) | 21.09<br>(17.02 to 25.31) |
| Laos                                   | 276.02<br>(195.66 to 373.48) | 245.37<br>(182.97 to 314.77) | 220.12<br>(177.62 to 265.21) | 189.09<br>(164.56 to 215.50) | 170.68<br>(152.07 to 191.04) | 151.11<br>(134.16 to 170.56) | 128.65<br>(114.12 to 145.47) | 102.45<br>(89.26 to 117.32) | 74.63<br>(62.03 to 88.79) | 51.95<br>(36.54 to 71.67) |
| Malaysia                               | 50.58<br>(49.53 to 51.67)    | 38.83<br>(37.55 to 40.02)    | 28.04<br>(26.65 to 29.43)    | 20.18<br>(19.62 to 20.76)    | 15.14<br>(14.71 to 15.61)    | 11.88<br>(11.58 to 12.20)    | 8.42<br>(8.17 to 8.68)       | 7.27<br>(7.04 to 7.49)      | 7.15<br>(6.80 to 7.53)    | 5.46<br>(4.95 to 6.04)    |
| Maldives                               | 383.62<br>(364.78 to 404.74) | 315.79<br>(307.94 to 323.49) | 266.23<br>(260.59 to 271.90) | 182.12<br>(178.78 to 185.44) | 106.49<br>(103.67 to 109.51) | 56.94<br>(54.91 to 58.80)    | 28.60<br>(27.32 to 29.92)    | 16.17<br>(15.29 to 17.04)   | 10.37<br>(9.65 to 11.16)  | 6.63<br>(5.87 to 7.62)    |
| Mauritius                              | 81.88<br>(79.66 to 84.27)    | 56.57<br>(54.91 to 58.18)    | 35.77<br>(34.79 to 36.88)    | 25.88<br>(25.00 to 26.76)    | 19.66<br>(19.01 to 20.39)    | 17.55<br>(16.99 to 18.12)    | 15.63<br>(15.12 to 16.18)    | 14.32<br>(13.69 to 14.96)   | 13.78<br>(13.15 to 14.48) | 12.23<br>(11.16 to 13.47) |
| Myanmar                                | 184.05<br>(148.01 to 220.41) | 145.43<br>(118.63 to 175.71) | 120.13<br>(97.78 to 143.73)  | 104.59<br>(86.01 to 124.85)  | 93.94<br>(78.60 to 111.41)   | 84.84<br>(70.46 to 103.19)   | 73.67<br>(59.93 to 89.10)    | 57.83<br>(46.78 to 71.13)   | 38.42<br>(29.99 to 48.63) | 23.53<br>(17.72 to 31.81) |
| Philippines                            | 91.94<br>(87.39 to 96.81)    | 81.81<br>(77.59 to 86.20)    | 72.89<br>(69.06 to 76.71)    | 62.36<br>(58.81 to 65.92)    | 50.10<br>(47.46 to 52.83)    | 40.03<br>(37.63 to 42.49)    | 34.02<br>(31.51 to 36.49)    | 30.20<br>(27.52 to 33.13)   | 26.34<br>(23.34 to 29.66) | 20.86<br>(17.69 to 24.61) |
| Sri Lanka                              | 67.12<br>(65.62 to 68.65)    | 65.68<br>(64.23 to 67.15)    | 40.79<br>(39.81 to 41.83)    | 29.60<br>(28.80 to 30.46)    | 20.55<br>(20.10 to 21.00)    | 16.71<br>(16.10 to 17.32)    | 13.06<br>(12.80 to 13.32)    | 12.12<br>(11.50 to 12.74)   | 11.80<br>(11.50 to 12.10) | 10.33<br>(9.79 to 10.87)  |
| Seychelles                             | 83.33<br>(62.44 to 71.50)    | 62.33<br>(42.40 to 48.61)    | 46.42<br>(25.90 to 30.25)    | 34.79<br>(18.65 to 22.60)    | 25.51<br>(14.97 to 18.52)    | 18.61<br>(11.75 to 14.45)    | 15.15<br>(10.80 to 13.65)    | 10.67<br>(10.71 to 13.62)   | 8.07<br>(10.39 to 13.39)  | 5.81<br>(8.75 to 12.24)   |
| Thailand                               | 297.74<br>(241.36 to 363.32) | 270.72<br>(231.45 to 315.29) | 248.56<br>(214.93 to 284.89) | 178.72<br>(158.27 to 201.85) | 145.97<br>(128.60 to 164.86) | 114.49<br>(98.76 to 132.07)  | 94.90<br>(79.26 to 112.4     |                             |                           |                           |

Appendix Table 11C. Under-5 mortality rates by location, females, 1970, 1975, 1980, 1985, 1990, 1995, 2000, 2005, 2010, 2016

| Location                     | 1970                         | 1975                         | 1980                         | 1985                         | 1990                         | 1995                         | 2000                         | 2005                         | 2010                       | 2016                      |
|------------------------------|------------------------------|------------------------------|------------------------------|------------------------------|------------------------------|------------------------------|------------------------------|------------------------------|----------------------------|---------------------------|
| Guam                         | 28.61<br>(25.99 to 31.76)    | 22.86<br>(21.40 to 24.49)    | 15.68<br>(14.53 to 16.82)    | 12.34<br>(11.84 to 13.00)    | 11.35<br>(10.31 to 12.42)    | 10.87<br>(10.19 to 11.57)    | 10.08<br>(9.10 to 11.18)     | 11.15<br>(10.13 to 12.39)    | 12.37<br>(11.56 to 13.27)  | 12.02<br>(9.77 to 15.06)  |
| Kiribati                     | 126.82<br>(95.75 to 161.14)  | 100.52<br>(66.73 to 143.53)  | 87.65<br>(53.12 to 142.96)   | 86.90<br>(55.44 to 130.41)   | 78.76<br>(58.02 to 101.96)   | 69.07<br>(54.32 to 85.69)    | 62.66<br>(49.66 to 78.28)    | 60.01<br>(44.52 to 77.55)    | 55.83<br>(35.02 to 83.70)  | 45.75<br>(24.16 to 79.53) |
| Marshall Islands             | 68.18<br>(36.66 to 114.46)   | 55.85<br>(29.80 to 95.97)    | 46.28<br>(27.65 to 76.47)    | 44.27<br>(29.09 to 64.59)    | 37.61<br>(27.26 to 51.99)    | 31.17<br>(21.58 to 42.75)    | 35.77<br>(21.94 to 54.80)    | 29.03<br>(18.18 to 42.45)    | 23.92<br>(13.43 to 37.87)  | 19.21<br>(10.22 to 32.79) |
| Northern Mariana Islands     | 15.64<br>(8.65 to 26.15)     | 11.69<br>(6.55 to 21.00)     | 9.08<br>(4.95 to 15.71)      | 7.37<br>(3.88 to 12.55)      | 5.90<br>(3.06 to 9.82)       | 5.11<br>(2.85 to 8.17)       | 4.01<br>(2.94 to 5.30)       | 3.08<br>(2.20 to 4.09)       | 1.92<br>(1.31 to 2.72)     | 2.21<br>(1.19 to 3.74)    |
| Papua New Guinea             | 118.71<br>(92.94 to 146.09)  | 105.49<br>(84.69 to 127.82)  | 98.54<br>(81.43 to 117.18)   | 92.77<br>(76.42 to 110.72)   | 85.71<br>(69.17 to 104.87)   | 76.59<br>(58.99 to 97.16)    | 69.24<br>(49.48 to 94.63)    | 65.92<br>(41.21 to 97.56)    | 58.40<br>(34.24 to 91.22)  | 45.68<br>(26.21 to 75.23) |
| Samoa                        | 52.96<br>(41.53 to 65.36)    | 41.84<br>(30.02 to 56.48)    | 28.61<br>(18.49 to 43.87)    | 24.21<br>(14.28 to 40.06)    | 19.98<br>(10.89 to 35.29)    | 16.53<br>(8.44 to 30.31)     | 13.99<br>(6.92 to 24.72)     | 12.56<br>(6.25 to 22.36)     | 11.12<br>(5.47 to 19.74)   | 9.15<br>(4.49 to 17.17)   |
| Solomon Islands              | 107.16<br>(82.09 to 134.01)  | 86.16<br>(62.79 to 115.55)   | 55.88<br>(39.73 to 80.15)    | 45.40<br>(31.92 to 62.31)    | 40.65<br>(29.65 to 53.47)    | 35.03<br>(26.10 to 45.69)    | 32.36<br>(23.72 to 42.89)    | 32.27<br>(22.49 to 44.09)    | 28.42<br>(19.54 to 40.38)  | 22.62<br>(14.96 to 33.22) |
| Tonga                        | 33.09<br>(24.36 to 44.09)    | 29.89<br>(21.47 to 40.33)    | 27.66<br>(18.48 to 39.30)    | 23.40<br>(14.62 to 35.60)    | 20.68<br>(12.40 to 31.81)    | 19.94<br>(11.87 to 31.17)    | 19.06<br>(11.29 to 30.55)    | 17.98<br>(10.70 to 29.16)    | 17.28<br>(9.88 to 29.15)   | 14.96<br>(7.90 to 26.33)  |
| Vanuatu                      | 88.92<br>(61.72 to 124.84)   | 68.84<br>(46.20 to 98.82)    | 52.20<br>(34.73 to 75.10)    | 42.48<br>(30.60 to 57.04)    | 37.66<br>(28.83 to 48.22)    | 34.70<br>(26.89 to 43.86)    | 35.94<br>(27.88 to 46.02)    | 37.58<br>(28.99 to 48.52)    | 33.24<br>(23.53 to 44.37)  | 28.20<br>(19.09 to 42.24) |
| North Africa and Middle East | 200.49<br>(189.81 to 210.97) | 158.19<br>(151.73 to 164.85) | 124.51<br>(118.99 to 129.86) | 98.22<br>(92.69 to 104.02)   | 71.99<br>(69.03 to 75.04)    | 59.31<br>(56.95 to 61.70)    | 48.05<br>(45.84 to 50.42)    | 39.12<br>(36.70 to 41.70)    | 31.62<br>(28.72 to 34.61)  | 26.17<br>(22.62 to 30.78) |
| North Africa and Middle East | 200.49<br>(189.81 to 210.97) | 158.19<br>(151.73 to 164.85) | 124.51<br>(118.99 to 129.86) | 98.22<br>(92.69 to 104.02)   | 71.99<br>(69.03 to 75.04)    | 59.31<br>(56.95 to 61.70)    | 48.05<br>(45.84 to 50.42)    | 39.12<br>(36.70 to 41.70)    | 31.62<br>(28.72 to 34.61)  | 26.17<br>(22.62 to 30.78) |
| Afghanistan                  | 261.19<br>(207.74 to 312.10) | 248.96<br>(205.75 to 292.71) | 241.84<br>(205.66 to 279.61) | 219.88<br>(188.44 to 255.18) | 160.33<br>(147.78 to 174.16) | 150.64<br>(137.51 to 164.71) | 136.41<br>(125.93 to 147.91) | 111.24<br>(103.74 to 119.22) | 85.63<br>(76.91 to 96.07)  | 65.17<br>(55.79 to 76.01) |
| Algeria                      | 170.38<br>(150.18 to 190.71) | 137.09<br>(122.32 to 152.83) | 100.45<br>(90.89 to 110.18)  | 65.71<br>(59.91 to 71.80)    | 45.98<br>(41.97 to 50.25)    | 37.70<br>(33.83 to 41.85)    | 30.63<br>(27.25 to 34.23)    | 25.41<br>(22.38 to 28.82)    | 21.69<br>(18.61 to 24.92)  | 16.64<br>(12.91 to 21.72) |
| Bahrain                      | 90.25<br>(71.06 to 111.59)   | 53.81<br>(44.03 to 65.58)    | 28.00<br>(25.76 to 30.61)    | 20.60<br>(19.14 to 22.17)    | 21.06<br>(19.61 to 22.60)    | 17.13<br>(15.78 to 18.62)    | 11.72<br>(10.74 to 12.81)    | 12.23<br>(11.12 to 13.40)    | 7.84<br>(7.14 to 8.62)     | 6.59<br>(5.22 to 8.21)    |
| Egypt                        | 255.72<br>(234.80 to 276.24) | 214.99<br>(197.07 to 232.22) | 164.66<br>(148.71 to 180.61) | 117.40<br>(106.98 to 128.92) | 85.54<br>(77.44 to 94.18)    | 62.38<br>(55.85 to 69.92)    | 43.03<br>(37.86 to 48.67)    | 33.86<br>(29.07 to 38.87)    | 26.54<br>(22.51 to 31.09)  | 17.97<br>(12.63 to 25.23) |
| Iran                         | 236.27<br>(195.29 to 279.61) | 136.26<br>(114.06 to 160.68) | 102.62<br>(86.83 to 117.98)  | 80.08<br>(67.91 to 93.72)    | 63.35<br>(54.19 to 74.30)    | 46.79<br>(39.05 to 55.36)    | 37.39<br>(30.23 to 45.91)    | 26.56<br>(19.89 to 34.92)    | 19.63<br>(14.32 to 26.47)  | 15.81<br>(11.17 to 21.77) |
| Iraq                         | 113.16<br>(98.71 to 127.55)  | 94.16<br>(85.54 to 102.69)   | 75.78<br>(66.68 to 88.13)    | 68.16<br>(56.82 to 85.99)    | 47.10<br>(43.91 to 50.32)    | 46.22<br>(42.93 to 49.75)    | 38.47<br>(35.57 to 41.83)    | 34.47<br>(33.37 to 44.15)    | 31.20<br>(26.66 to 36.23)  | 27.04<br>(21.03 to 35.07) |
| Jordan                       | 107.81<br>(97.16 to 118.88)  | 83.95<br>(77.07 to 90.94)    | 57.89<br>(53.99 to 61.86)    | 40.92<br>(37.91 to 44.01)    | 33.56<br>(31.17 to 35.87)    | 29.60<br>(27.35 to 31.92)    | 26.35<br>(24.20 to 28.50)    | 23.02<br>(20.92 to 25.13)    | 18.92<br>(16.67 to 21.37)  | 16.85<br>(13.72 to 20.87) |
| Kuwait                       | 47.29<br>(45.12 to 49.43)    | 43.00<br>(41.15 to 44.85)    | 29.67<br>(28.19 to 31.17)    | 19.39<br>(18.44 to 20.48)    | 14.50<br>(12.30 to 16.86)    | 11.94<br>(11.14 to 12.74)    | 11.96<br>(11.08 to 12.83)    | 10.53<br>(9.81 to 11.34)     | 9.99<br>(9.30 to 10.71)    | 8.77<br>(6.84 to 11.10)   |
| Lebanon                      | 68.47<br>(54.68 to 85.16)    | 43.00<br>(33.43 to 91.46)    | 29.67<br>(48.85 to 114.86)   | 19.39<br>(34.75 to 60.19)    | 14.50<br>(29.28 to 42.99)    | 11.94<br>(20.59 to 30.89)    | 11.96<br>(14.41 to 23.77)    | 10.53<br>(10.12 to 18.75)    | 9.99<br>(8.42 to 15.17)    | 8.77<br>(7.23 to 13.15)   |
| Libya                        | 116.16<br>(103.28 to 129.74) | 84.72<br>(76.04 to 94.43)    | 59.96<br>(53.41 to 66.83)    | 45.64<br>(40.80 to 50.89)    | 37.84<br>(33.59 to 42.31)    | 30.05<br>(25.95 to 34.48)    | 24.78<br>(20.31 to 29.91)    | 19.64<br>(15.05 to 24.95)    | 14.40<br>(10.63 to 19.13)  | 13.24<br>(9.14 to 18.97)  |
| Morocco                      | 171.59<br>(162.16 to 181.90) | 144.17<br>(136.66 to 152.29) | 112.28<br>(105.79 to 119.17) | 85.37<br>(79.63 to 90.74)    | 65.93<br>(61.36 to 70.50)    | 52.06<br>(47.57 to 56.94)    | 41.72<br>(36.68 to 47.25)    | 33.70<br>(28.68 to 39.00)    | 26.68<br>(21.28 to 33.07)  | 19.60<br>(15.52 to 24.78) |
| Palestine                    | 85.90<br>(63.23 to 115.94)   | 77.47<br>(62.88 to 94.38)    | 64.69<br>(55.40 to 75.73)    | 45.52<br>(39.47 to 52.67)    | 41.11<br>(35.85 to 46.75)    | 29.29<br>(24.68 to 33.87)    | 26.25<br>(22.24 to 31.15)    | 23.43<br>(19.96 to 27.73)    | 19.82<br>(16.50 to 23.50)  | 15.24<br>(10.80 to 20.84) |
| Oman                         | 280.77<br>(248.19 to 316.45) | 206.56<br>(180.05 to 232.73) | 136.76<br>(117.82 to 157.14) | 80.26<br>(67.04 to 94.55)    | 47.18<br>(38.59 to 57.94)    | 26.91<br>(21.99 to 32.89)    | 14.73<br>(12.66 to 17.17)    | 7.20<br>(6.82 to 7.55)       | 7.92<br>(7.54 to 8.30)     | 7.45<br>(6.50 to 8.51)    |
| Qatar                        | 73.68<br>(50.99 to 101.19)   | 62.91<br>(47.68 to 81.76)    | 34.00<br>(24.54 to 45.82)    | 25.63<br>(19.24 to 32.96)    | 19.98<br>(14.44 to 26.98)    | 17.41<br>(12.29 to 23.78)    | 15.13<br>(10.81 to 20.60)    | 12.37<br>(8.80 to 17.17)     | 10.32<br>(7.22 to 14.10)   | 8.46<br>(5.47 to 12.53)   |
| Saudi Arabia                 | 135.99<br>(107.58 to 169.08) | 99.27<br>(81.98 to 120.46)   | 73.03<br>(60.88 to 87.68)    | 54.21<br>(43.67 to 66.05)    | 42.16<br>(32.74 to 53.20)    | 30.23<br>(22.74 to 39.99)    | 20.63<br>(15.15 to 27.96)    | 14.40<br>(10.37 to 19.69)    | 9.93<br>(6.96 to 14.20)    | 5.84<br>(3.94 to 8.86)    |
| Sudan                        | 191.44<br>(174.76 to 209.42) | 183.35<br>(164.49 to 200.38) | 170.08<br>(152.16 to 188.15) | 221.37<br>(171.60 to 276.90) | 128.34<br>(115.94 to 142.86) | 106.99<br>(94.89 to 119.89)  | 86.54<br>(77.50 to 97.15)    | 70.73<br>(62.02 to 79.42)    | 67.59<br>(58.21 to 77.74)  | 54.94<br>(42.73 to 71.16) |
| Syria                        | 103.88<br>(95.57 to 112.08)  | 80.91<br>(74.40 to 87.80)    | 60.64<br>(55.01 to 66.41)    | 47.84<br>(43.39 to 52.66)    | 38.91<br>(34.73 to 43.32)    | 25.92<br>(24.09 to 27.91)    | 16.12<br>(15.57 to 16.74)    | 13.71<br>(13.23 to 14.33)    | 13.46<br>(12.91 to 14.13)  | 29.24<br>(12.88 to 53.07) |
| Tunisia                      | 152.88<br>(145.76 to 160.42) | 113.36<br>(108.00 to 118.41) | 82.32<br>(76.96 to 87.68)    | 59.02<br>(54.81 to 63.16)    | 43.92<br>(40.62 to 47.39)    | 32.32<br>(29.43 to 35.52)    | 23.50<br>(21.11 to 26.20)    | 18.09<br>(15.82 to 20.44)    | 14.63<br>(12.19 to 17.41)  | 10.63<br>(8.78 to 13.46)  |
| Turkey                       | 181.77<br>(165.56 to 198.22) | 152.59<br>(139.22 to 167.92) | 117.82<br>(105.62 to 130.71) | 87.26<br>(77.50 to 97.35)    | 66.50<br>(59.56 to 74.28)    | 51.83<br>(45.47 to 58.91)    | 36.87<br>(31.40 to 42.81)    | 26.18<br>(21.77 to 31.38)    | 19.80<br>(14.89 to 26.16)  | 14.08<br>(10.02 to 19.43) |
| United Arab Emirates         | 108.51<br>(75.02 to 149.41)  | 77.05<br>(50.62 to 115.14)   | 49.74<br>(31.76 to 72.23)    | 29.57<br>(16.63 to 48.39)    | 20.02<br>(10.72 to 32.89)    | 13.81<br>(7.15 to 24.40)     | 9.40<br>(5.04 to 15.88)      | 5.79<br>(4.57 to 7.30)       | 5.93<br>(3.41 to 9.52)     | 5.15<br>(2.68 to 9.23)    |
| Yemen                        | 306.69<br>(291.83 to 320.91) | 241.58<br>(227.54 to 255.03) | 187.48<br>(176.42 to 198.29) | 151.09<br>(142.83 to 159.41) | 127.49<br>(120.92 to 134.76) | 107.32<br>(100.75 to 113.79) | 87.11<br>(81.56 to 93.02)    | 67.21<br>(61.82 to 73.36)    | 50.34<br>(44.55 to 57.45)  | 42.54<br>(34.93 to 52.56) |
| South Asia                   | 207.70<br>(197.68 to 217.51) | 182.84<br>(173.39 to 192.36) | 159.28<br>(152.02 to 167.17) | 136.90<br>(130.76 to 143.15) | 116.43<br>(110.89 to 122.15) | 100.55<br>(95.72 to 105.33)  | 86.40<br>(82.60 to 90.23)    | 73.34<br>(68.96 to 77.94)    | 58.56<br>(54.00 to 63.40)  | 40.91<br>(36.87 to 45.54) |
| South Asia                   | 207.70<br>(197.68 to 217.51) | 182.84<br>(173.39 to 192.36) | 159.28<br>(152.02 to 167.17) | 136.90<br>(130.76 to 143.15) | 116.43<br>(110.89 to 122.15) | 100.55<br>(95.72 to 105.33)  | 86.40<br>(82.60 to 90.23)    | 73.34<br>(68.96 to 77.94)    | 58.56<br>(54.00 to 63.40)  | 40.91<br>(36.87 to 45.54) |
| Bangladesh                   | 225.54<br>(209.75 to 242.26) | 205.93<br>(194.62 to 217.84) | 192.54<br>(183.85 to 201.78) | 165.76<br>(157.44 to 174.35) | 134.16<br>(127.17 to 141.12) | 106.97<br>(101.38 to 112.77) | 84.13<br>(79.44 to 88.78)    | 65.70<br>(61.07 to 70.32)    | 49.00<br>(44.76 to 53.74)  | 32.18<br>(28.47 to 36.65) |
| Bhutan                       | 258.90<br>(226.35 to 293.10) | 230.80<br>(205.00 to 258.09) | 205.98<br>(185.89 to 227.96) | 171.41<br>(155.53 to 188.56) | 135.60<br>(123.49 to 148.99) | 108.13<br>(97.02 to 119.32)  | 85.84<br>(76.31 to 97.11)    | 64.78<br>(57.10 to 74.06)    | 47.51<br>(41.28 to 54.41)  | 31.77<br>(27.38 to 37.33) |
| India                        | 202.90<br>(186.87 to 217.39) | 175.88<br>(165.25 to 187.31) | 154.28<br>(147.80 to 161.03) | 133.02<br>(125.95 to 140.03) | 114.18<br>(107.22 to 120.96) | 99.70<br>(93.32 to 105.82)   | 86.03<br>(80.67 to 91.81)    | 73.47<br>(67.44 to 79.57)    | 58.49<br>(52.31 to 65.68)  | 40.61<br>(33.89 to 48.63) |
| Nepal                        | 243.76<br>(232.35 to 255.57) | 223.90<br>(215.10 to 232.35) | 200.95<br>(194.40 to 207.49) | 170.95<br>(165.13 to 176.86) | 137.46<br>(133.00 to 141.87) | 106.12<br>(101.53 to 110.77) | 81.13<br>(76.20 to 86.17)    | 62.25<br>(57.61 to 66.95)    | 44.91<br>(41.26 to 48.99)  | 28.02<br>(25.15 to 31.26) |
| Pakistan                     | 180.67<br>(173.82 to 187.72) | 164.19<br>(157.52 to 171.55) | 148.63<br>(142.37 to 155.07) | 130.77<br>(125.14 to 136.09) | 114.55<br>(109.38 to 119.88) | 102.66<br>(97.92 to 107.63)  | 92.72<br>(88.23 to 97.60)    | 85.72<br>(79.26 to 92.46)    | 71.46<br>(64.65 to 78.57)  | 52.90<br>(47.54 to 58.88) |
| Sub-Saharan Africa           | 217.46<br>(206.43 to 228.91) | 200.92<br>(193.28 to 208.69) | 184.03<br>(179.30 to 189.22) | 171.59<br>(167.43 to 176.06) | 161.33<br>(157.70 to 164.89) | 151.52<br>(147.27 to 155.81) | 137.60<br>(133.99 to 140.99) | 116.86<br>(113.66 to 120.35) | 95.84<br>(91.28 to 100.56) | 71.16<br>(64.96 to 78.39) |
| Southern Sub-Saharan Africa  | 116.74<br>(104.48 to 131.01) | 103.76<br>(96.98 to 111.09)  | 93.51<br>(88.04 to 98.80)    | 80.03<br>(75.98 to 84.30)    | 66.97<br>(63.82 to 70.23)    | 63.19<br>(59.58 to 67.26)    | 69.45<br>(65.22 to 74.33)    | 72.03<br>(65.98 to 78.66)    | 60.42<br>(55.37 to 65.53)  | 42.31<br>(36.12 to 50.19) |
| Botswana                     | 94.83<br>(83.76 to 106.59)   | 75.71<br>(67.77 to 83.86)    | 62.72<br>(56.07 to 69.33)    | 52.23<br>(46.54 to 58.20)    | 44.11<br>(39.57 to 48.68)    | 51.95<br>(46.98 to 57.32)    | 57.38<br>(51.08 to 64.46)    | 41.96<br>(35.53 to 48.65)    | 23.33<br>(18.86 to 28.67)  | 12.86<br>(9.85 to 17.20)  |
| Lesotho                      | 112.22<br>(102.69 to 122.69) | 105.95<br>(98.29 to 114.53)  | 96.36<br>(89.68 to 103.12)   | 87.63<br>(81.96 to 93.42)    | 77.60<br>(72.48 to 83.42)    | 76.33<br>(70.98 to 81.96)    | 88.90<br>(82.23 to 96.00)    | 98.34<br>(88.53 to 108.66)   | 79.08<br>(67.89 to 91.66)  | 58.54<br>(46.73 to 73.10) |
| Namibia                      | 105.74<br>(83.85             |                              |                              |                              |                              |                              |                              |                              |                            |                           |

Appendix Table 11C. Under-5 mortality rates by location, females, 1970, 1975, 1980, 1985, 1990, 1995, 2000, 2005, 2010, 2016

| Location                   | 1970                         | 1975                         | 1980                         | 1985                         | 1990                         | 1995                         | 2000                         | 2005                         | 2010                         | 2016                        |
|----------------------------|------------------------------|------------------------------|------------------------------|------------------------------|------------------------------|------------------------------|------------------------------|------------------------------|------------------------------|-----------------------------|
| South Africa               | 126.53<br>(110.94 to 145.36) | 112.94<br>(104.19 to 122.49) | 101.82<br>(94.02 to 109.58)  | 88.41<br>(82.58 to 94.58)    | 72.78<br>(67.63 to 77.81)    | 65.14<br>(59.30 to 71.45)    | 71.76<br>(65.62 to 78.63)    | 73.41<br>(64.71 to 83.32)    | 58.76<br>(51.59 to 65.53)    | 40.43<br>(31.37 to 51.42)   |
| Swaziland                  | 181.04<br>(135.11 to 237.87) | 142.04<br>(114.50 to 172.59) | 110.10<br>(95.95 to 125.11)  | 82.18<br>(73.85 to 91.52)    | 59.91<br>(54.21 to 66.22)    | 62.10<br>(56.77 to 68.00)    | 83.76<br>(77.00 to 90.95)    | 94.08<br>(84.73 to 103.80)   | 66.47<br>(57.93 to 75.83)    | 43.54<br>(34.43 to 53.88)   |
| Zimbabwe                   | 99.36<br>(91.14 to 107.26)   | 87.95<br>(80.58 to 95.55)    | 79.62<br>(73.35 to 85.94)    | 64.77<br>(60.47 to 69.57)    | 57.86<br>(54.20 to 61.81)    | 64.14<br>(60.11 to 68.26)    | 74.98<br>(67.00 to 71.62)    | 70.79<br>(69.39 to 80.92)    | 50.76<br>(64.18 to 77.68)    | 50.76<br>(44.68 to 58.83)   |
| Western Sub-Saharan Africa | 253.13<br>(240.22 to 266.02) | 230.82<br>(220.57 to 241.47) | 209.30<br>(202.25 to 216.70) | 194.15<br>(187.83 to 200.54) | 184.01<br>(178.82 to 189.32) | 174.21<br>(168.67 to 180.04) | 159.88<br>(155.08 to 164.64) | 139.91<br>(134.44 to 145.20) | 117.31<br>(110.71 to 124.43) | 91.02<br>(82.97 to 100.13)  |
| Benin                      | 268.92<br>(251.82 to 285.06) | 235.03<br>(221.02 to 248.37) | 205.87<br>(194.76 to 216.65) | 183.61<br>(175.92 to 191.63) | 168.39<br>(160.61 to 176.43) | 151.95<br>(142.45 to 161.87) | 131.89<br>(122.06 to 142.01) | 109.30<br>(99.15 to 120.10)  | 89.38<br>(78.57 to 102.43)   | 67.37<br>(56.09 to 81.53)   |
| Burkina Faso               | 297.27<br>(281.10 to 314.72) | 274.83<br>(262.93 to 287.19) | 246.45<br>(238.39 to 254.64) | 223.14<br>(214.68 to 231.55) | 202.34<br>(192.10 to 212.27) | 188.47<br>(179.54 to 197.12) | 168.75<br>(162.94 to 174.68) | 145.90<br>(137.55 to 154.23) | 124.64<br>(114.64 to 135.31) | 99.97<br>(89.54 to 112.98)  |
| Cameroon                   | 193.66<br>(183.45 to 204.49) | 174.64<br>(165.10 to 183.74) | 157.51<br>(149.68 to 165.23) | 138.49<br>(130.43 to 146.48) | 129.03<br>(120.91 to 137.40) | 132.31<br>(124.65 to 140.39) | 128.91<br>(120.54 to 138.81) | 118.15<br>(106.86 to 130.33) | 103.17<br>(89.13 to 119.14)  | 82.72<br>(66.71 to 102.19)  |
| Cape Verde                 | 173.40<br>(167.58 to 179.56) | 129.52<br>(124.51 to 134.80) | 87.03<br>(83.30 to 91.50)    | 85.65<br>(82.03 to 89.50)    | 59.98<br>(57.26 to 62.73)    | 66.02<br>(52.85 to 79.93)    | 40.36<br>(35.07 to 46.27)    | 29.00<br>(25.45 to 33.22)    | 19.91<br>(18.28 to 21.75)    | 14.52<br>(12.68 to 16.55)   |
| Chad                       | 243.34<br>(222.97 to 264.03) | 226.70<br>(211.45 to 242.49) | 219.23<br>(205.33 to 233.43) | 210.91<br>(198.90 to 223.35) | 191.05<br>(181.42 to 200.15) | 179.53<br>(170.62 to 188.25) | 176.09<br>(167.00 to 185.57) | 157.63<br>(147.10 to 168.05) | 134.39<br>(122.71 to 147.82) | 107.85<br>(95.70 to 122.91) |
| Cote d'Ivoire              | 199.91<br>(189.15 to 210.37) | 169.66<br>(161.15 to 178.07) | 144.31<br>(136.84 to 151.94) | 135.93<br>(129.25 to 142.84) | 132.86<br>(126.50 to 139.66) | 131.78<br>(123.98 to 139.99) | 121.86<br>(113.72 to 130.52) | 110.73<br>(101.61 to 120.55) | 94.98<br>(84.92 to 105.41)   | 74.21<br>(64.71 to 85.39)   |
| The Gambia                 | 165.32<br>(144.17 to 187.66) | 146.98<br>(129.46 to 165.31) | 128.94<br>(115.84 to 142.73) | 113.47<br>(104.45 to 122.09) | 102.33<br>(96.63 to 107.95)  | 90.76<br>(84.60 to 97.12)    | 79.57<br>(73.19 to 86.23)    | 67.63<br>(61.17 to 74.98)    | 56.02<br>(49.67 to 63.14)    | 44.84<br>(38.18 to 53.56)   |
| Ghana                      | 160.38<br>(152.12 to 169.31) | 146.32<br>(139.26 to 154.07) | 138.20<br>(131.24 to 145.67) | 130.47<br>(124.84 to 136.79) | 114.03<br>(110.35 to 118.20) | 101.84<br>(96.46 to 107.20)  | 92.53<br>(87.56 to 97.95)    | 81.60<br>(76.36 to 86.84)    | 66.47<br>(60.19 to 72.92)    | 45.79<br>(38.45 to 55.15)   |
| Guinea                     | 306.30<br>(274.88 to 337.01) | 292.92<br>(271.79 to 314.82) | 268.51<br>(254.19 to 282.94) | 244.71<br>(232.09 to 257.60) | 217.11<br>(204.15 to 229.50) | 191.77<br>(179.89 to 203.16) | 163.85<br>(154.30 to 173.44) | 141.45<br>(130.67 to 152.01) | 118.81<br>(106.87 to 132.97) | 91.21<br>(77.29 to 108.58)  |
| Guinea-Bissau              | 274.16<br>(240.66 to 311.46) | 243.78<br>(216.56 to 273.68) | 223.39<br>(201.58 to 246.24) | 210.52<br>(194.46 to 226.99) | 188.40<br>(177.57 to 200.60) | 165.19<br>(154.61 to 175.66) | 142.63<br>(132.23 to 153.28) | 124.93<br>(113.17 to 137.37) | 92.00<br>(82.27 to 102.04)   | 64.36<br>(55.46 to 74.11)   |
| Liberia                    | 272.89<br>(253.70 to 292.11) | 248.77<br>(231.26 to 267.44) | 229.17<br>(213.94 to 244.65) | 215.55<br>(205.56 to 226.02) | 207.88<br>(198.71 to 217.23) | 203.83<br>(193.36 to 214.91) | 162.92<br>(154.34 to 172.07) | 116.32<br>(110.75 to 121.62) | 88.94<br>(82.77 to 95.62)    | 61.33<br>(54.35 to 70.07)   |
| Mali                       | 344.85<br>(327.58 to 363.46) | 317.20<br>(303.64 to 331.44) | 280.07<br>(267.24 to 293.10) | 253.69<br>(242.30 to 265.05) | 227.37<br>(216.98 to 238.78) | 205.80<br>(194.34 to 218.38) | 183.20<br>(173.44 to 193.27) | 156.33<br>(147.38 to 165.18) | 131.34<br>(120.37 to 143.90) | 108.59<br>(92.92 to 128.55) |
| Mauritania                 | 162.62<br>(154.62 to 171.47) | 153.68<br>(146.84 to 160.29) | 135.34<br>(128.45 to 141.80) | 118.09<br>(111.42 to 125.00) | 103.74<br>(97.48 to 110.08)  | 93.77<br>(88.23 to 99.34)    | 85.63<br>(79.89 to 91.68)    | 76.79<br>(70.29 to 83.19)    | 60.64<br>(54.46 to 67.07)    | 44.98<br>(39.29 to 51.61)   |
| Niger                      | 320.11<br>(298.56 to 344.18) | 323.72<br>(306.39 to 342.35) | 314.76<br>(301.11 to 328.77) | 305.58<br>(292.13 to 319.33) | 288.83<br>(274.80 to 302.74) | 262.12<br>(248.16 to 276.22) | 220.12<br>(208.14 to 232.55) | 174.46<br>(160.89 to 188.37) | 136.97<br>(121.75 to 153.61) | 104.87<br>(89.44 to 124.54) |
| Nigeria                    | 254.45<br>(228.67 to 280.41) | 229.85<br>(212.23 to 248.66) | 208.58<br>(198.01 to 219.16) | 196.48<br>(186.34 to 206.61) | 194.92<br>(184.47 to 205.03) | 186.87<br>(176.87 to 196.67) | 174.20<br>(165.13 to 184.44) | 155.24<br>(144.83 to 165.37) | 131.72<br>(120.18 to 143.62) | 102.71<br>(87.79 to 119.24) |
| Sao Tome and Principe      | 143.43<br>(134.41 to 152.75) | 112.35<br>(103.52 to 122.47) | 105.96<br>(100.73 to 111.44) | 116.04<br>(109.08 to 123.55) | 98.19<br>(90.12 to 106.97)   | 84.41<br>(77.24 to 92.58)    | 67.06<br>(62.01 to 72.61)    | 53.36<br>(47.38 to 59.89)    | 35.95<br>(32.00 to 40.49)    | 25.68<br>(22.50 to 29.68)   |
| Senegal                    | 264.76<br>(251.52 to 278.35) | 235.64<br>(222.40 to 250.10) | 195.16<br>(185.04 to 206.25) | 160.45<br>(151.31 to 169.95) | 136.07<br>(128.41 to 144.01) | 124.78<br>(119.11 to 130.31) | 105.95<br>(101.99 to 110.10) | 83.82<br>(78.37 to 90.25)    | 61.72<br>(56.88 to 67.07)    | 43.52<br>(38.19 to 49.83)   |
| Sierra Leone               | 294.46<br>(259.58 to 334.95) | 275.40<br>(247.01 to 305.54) | 264.46<br>(242.68 to 286.38) | 251.57<br>(237.36 to 266.99) | 234.33<br>(222.11 to 247.39) | 220.85<br>(209.04 to 232.44) | 205.12<br>(194.01 to 216.32) | 177.41<br>(165.11 to 188.94) | 146.14<br>(133.28 to 158.77) | 109.28<br>(95.85 to 124.01) |
| Togo                       | 203.77<br>(190.33 to 217.67) | 181.98<br>(171.41 to 192.76) | 162.06<br>(152.05 to 172.20) | 148.58<br>(139.55 to 157.88) | 135.88<br>(128.38 to 143.19) | 125.41<br>(118.76 to 132.17) | 113.56<br>(107.36 to 119.97) | 101.33<br>(94.36 to 108.58)  | 84.83<br>(77.44 to 93.30)    | 62.65<br>(55.38 to 71.82)   |
| Eastern Sub-Saharan Africa | 201.41<br>(191.77 to 210.60) | 190.61<br>(182.69 to 198.42) | 177.22<br>(170.58 to 184.22) | 169.74<br>(164.76 to 175.05) | 156.93<br>(152.47 to 161.32) | 143.93<br>(139.33 to 148.59) | 124.67<br>(119.89 to 129.68) | 98.98<br>(94.68 to 103.62)   | 77.36<br>(72.57 to 82.31)    | 54.67<br>(48.28 to 62.80)   |
| Burundi                    | 234.55<br>(201.24 to 267.03) | 226.91<br>(201.37 to 256.40) | 206.07<br>(182.61 to 230.28) | 176.99<br>(159.36 to 195.55) | 168.76<br>(152.00 to 186.67) | 165.91<br>(149.21 to 184.22) | 156.06<br>(138.87 to 174.05) | 119.79<br>(105.37 to 135.76) | 91.28<br>(76.53 to 107.06)   | 75.25<br>(53.99 to 106.04)  |
| Comoros                    | 177.57<br>(154.22 to 202.70) | 164.44<br>(145.06 to 184.23) | 150.97<br>(132.47 to 169.95) | 130.10<br>(113.70 to 146.94) | 112.75<br>(100.66 to 125.25) | 100.45<br>(89.22 to 113.35)  | 93.77<br>(81.54 to 107.39)   | 77.40<br>(66.64 to 89.78)    | 65.74<br>(56.36 to 75.73)    | 49.90<br>(40.65 to 62.03)   |
| Djibouti                   | 125.53<br>(107.63 to 145.11) | 116.60<br>(103.88 to 129.99) | 111.21<br>(100.80 to 122.24) | 110.63<br>(101.43 to 120.08) | 106.78<br>(98.54 to 114.86)  | 103.02<br>(95.82 to 111.00)  | 94.90<br>(86.65 to 103.59)   | 78.38<br>(69.21 to 89.17)    | 63.43<br>(54.21 to 74.72)    | 43.55<br>(36.36 to 52.98)   |
| Eritrea                    | 204.61<br>(180.04 to 231.18) | 184.63<br>(166.94 to 202.35) | 169.57<br>(154.02 to 184.12) | 154.91<br>(141.93 to 169.28) | 135.93<br>(124.35 to 148.21) | 105.13<br>(95.37 to 115.89)  | 85.29<br>(75.03 to 96.24)    | 70.72<br>(59.60 to 82.67)    | 61.11<br>(49.77 to 74.25)    | 45.72<br>(36.54 to 58.20)   |
| Ethiopia                   | 204.56<br>(191.81 to 217.52) | 205.07<br>(191.30 to 218.47) | 191.72<br>(179.46 to 204.36) | 180.13<br>(170.63 to 189.91) | 171.36<br>(161.40 to 181.62) | 150.68<br>(140.06 to 161.19) | 129.82<br>(120.83 to 140.01) | 97.86<br>(90.42 to 106.06)   | 68.16<br>(62.25 to 74.67)    | 38.97<br>(34.95 to 44.29)   |
| Kenya                      | 133.94<br>(126.65 to 141.67) | 117.88<br>(111.50 to 125.48) | 102.49<br>(95.84 to 109.20)  | 93.12<br>(87.82 to 99.38)    | 88.27<br>(83.29 to 93.71)    | 90.53<br>(85.14 to 95.95)    | 83.60<br>(77.98 to 89.46)    | 68.45<br>(62.87 to 74.94)    | 51.88<br>(46.09 to 57.88)    | 39.48<br>(33.62 to 46.27)   |
| Madagascar                 | 161.23<br>(142.71 to 182.51) | 154.98<br>(137.74 to 174.39) | 154.87<br>(139.00 to 171.29) | 160.62<br>(144.19 to 176.65) | 140.82<br>(128.40 to 153.64) | 128.19<br>(116.29 to 141.29) | 111.11<br>(99.43 to 122.84)  | 96.12<br>(84.23 to 108.69)   | 91.43<br>(78.64 to 105.22)   | 75.44<br>(59.85 to 96.09)   |
| Malawi                     | 310.50<br>(280.97 to 344.47) | 276.42<br>(251.46 to 301.07) | 242.63<br>(224.23 to 262.80) | 227.79<br>(211.99 to 245.47) | 212.01<br>(197.65 to 227.61) | 184.26<br>(171.37 to 198.72) | 157.21<br>(144.86 to 170.52) | 117.98<br>(107.26 to 128.44) | 95.19<br>(84.65 to 106.02)   | 64.73<br>(52.42 to 81.20)   |
| Mozambique                 | 241.01<br>(213.00 to 268.54) | 225.37<br>(206.09 to 244.62) | 217.07<br>(203.59 to 230.30) | 243.68<br>(226.85 to 260.34) | 201.97<br>(193.35 to 210.78) | 182.95<br>(174.74 to 191.16) | 152.48<br>(144.57 to 160.55) | 122.56<br>(114.49 to 130.47) | 97.54<br>(88.46 to 107.15)   | 71.00<br>(61.70 to 82.83)   |
| Rwanda                     | 232.57<br>(211.65 to 253.14) | 228.31<br>(208.78 to 248.72) | 198.99<br>(181.77 to 216.96) | 163.30<br>(149.44 to 178.24) | 160.82<br>(148.34 to 174.96) | 176.32<br>(159.03 to 193.25) | 147.89<br>(134.39 to 162.01) | 100.14<br>(89.17 to 110.93)  | 62.35<br>(54.25 to 70.21)    | 45.24<br>(37.79 to 55.12)   |
| Somalia                    | 167.17<br>(146.70 to 191.59) | 196.58<br>(172.72 to 223.10) | 162.13<br>(149.62 to 177.18) | 170.24<br>(159.92 to 180.47) | 159.52<br>(151.47 to 168.06) | 152.33<br>(143.90 to 161.08) | 141.96<br>(131.35 to 153.93) | 121.94<br>(110.87 to 133.98) | 135.95<br>(120.30 to 155.03) | 89.53<br>(81.00 to 100.36)  |
| South Sudan                | 237.48<br>(181.12 to 305.17) | 226.51<br>(178.98 to 283.29) | 216.43<br>(178.73 to 256.27) | 206.57<br>(181.01 to 233.72) | 187.23<br>(169.35 to 207.53) | 159.80<br>(145.33 to 173.92) | 134.56<br>(123.15 to 146.34) | 115.48<br>(103.24 to 127.53) | 100.64<br>(85.78 to 116.41)  | 87.25<br>(68.50 to 109.41)  |
| Tanzania                   | 203.99<br>(190.01 to 217.45) | 185.59<br>(176.09 to 195.59) | 170.69<br>(162.92 to 179.35) | 160.49<br>(153.81 to 167.40) | 149.92<br>(144.24 to 155.67) | 138.86<br>(132.70 to 144.92) | 119.82<br>(113.94 to 125.96) | 96.50<br>(90.52 to 102.86)   | 73.62<br>(66.97 to 80.39)    | 52.55<br>(45.83 to 61.10)   |
| Uganda                     | 177.69<br>(164.89 to 190.02) | 169.91<br>(160.19 to 179.95) | 172.83<br>(162.88 to 182.78) | 164.84<br>(157.09 to 173.51) | 152.81<br>(146.22 to 159.13) | 140.79<br>(134.54 to 147.42) | 121.01<br>(115.67 to 126.49) | 101.25<br>(95.84 to 106.68)  | 80.92<br>(74.95 to 87.09)    | 55.38<br>(49.27 to 63.06)   |

Appendix Table 11C. Under-5 mortality rates by location, females, 1970, 1975, 1980, 1985, 1990, 1995, 2000, 2005, 2010, 2016

| Location                         | 1970                         | 1975                         | 1980                         | 1985                         | 1990                         | 1995                         | 2000                         | 2005                         | 2010                         | 2016                        |
|----------------------------------|------------------------------|------------------------------|------------------------------|------------------------------|------------------------------|------------------------------|------------------------------|------------------------------|------------------------------|-----------------------------|
| Zambia                           | 179.10<br>(157.73 to 204.27) | 160.08<br>(141.71 to 179.55) | 159.09<br>(143.06 to 177.55) | 163.32<br>(148.41 to 180.00) | 162.63<br>(150.08 to 175.72) | 152.30<br>(137.25 to 167.47) | 131.82<br>(117.76 to 145.57) | 102.33<br>(90.60 to 114.83)  | 74.22<br>(64.15 to 85.21)    | 51.96<br>(41.35 to 64.13)   |
| Central Sub-Saharan Africa       | 204.71<br>(168.62 to 244.67) | 191.37<br>(160.10 to 224.31) | 177.00<br>(155.32 to 200.34) | 158.34<br>(142.52 to 175.43) | 159.29<br>(145.57 to 172.89) | 152.78<br>(139.39 to 167.63) | 142.60<br>(128.62 to 157.34) | 120.00<br>(108.05 to 132.84) | 98.85<br>(85.64 to 112.95)   | 69.69<br>(52.79 to 90.59)   |
| Angola                           | 194.34<br>(149.31 to 246.70) | 187.43<br>(146.91 to 230.92) | 182.68<br>(148.97 to 218.35) | 175.59<br>(151.67 to 200.11) | 178.98<br>(157.70 to 201.92) | 155.78<br>(137.06 to 175.16) | 143.28<br>(125.30 to 163.30) | 115.08<br>(101.04 to 132.00) | 86.97<br>(72.72 to 104.19)   | 49.80<br>(37.02 to 65.74)   |
| Central African Republic         | 195.23<br>(161.07 to 233.17) | 194.29<br>(162.36 to 230.35) | 179.93<br>(152.72 to 213.32) | 171.51<br>(144.42 to 199.96) | 169.05<br>(145.04 to 195.26) | 167.60<br>(142.14 to 198.44) | 169.73<br>(141.36 to 202.51) | 160.91<br>(130.56 to 196.69) | 146.73<br>(112.81 to 184.40) | 122.91<br>(88.99 to 167.58) |
| Congo                            | 182.03<br>(144.92 to 219.71) | 156.41<br>(121.86 to 193.15) | 129.00<br>(106.71 to 153.35) | 101.14<br>(87.48 to 115.63)  | 91.69<br>(80.98 to 104.28)   | 94.50<br>(84.39 to 105.87)   | 97.85<br>(86.38 to 110.08)   | 81.79<br>(71.03 to 93.57)    | 62.89<br>(53.47 to 73.21)    | 47.82<br>(37.98 to 62.39)   |
| Democratic Republic of the Congo | 210.26<br>(165.32 to 259.81) | 195.39<br>(156.83 to 238.72) | 179.19<br>(149.45 to 211.60) | 156.23<br>(136.21 to 179.56) | 157.24<br>(138.09 to 177.71) | 155.59<br>(137.01 to 177.80) | 144.89<br>(124.71 to 167.47) | 122.71<br>(106.03 to 141.44) | 103.29<br>(85.24 to 123.08)  | 75.23<br>(54.36 to 101.14)  |
| Equatorial Guinea                | 230.87<br>(176.10 to 290.75) | 208.88<br>(171.09 to 251.95) | 180.33<br>(151.48 to 210.69) | 172.68<br>(148.57 to 200.10) | 182.65<br>(156.37 to 212.29) | 190.15<br>(161.07 to 223.00) | 136.78<br>(111.15 to 164.74) | 103.97<br>(81.26 to 130.74)  | 80.42<br>(60.16 to 106.84)   | 51.46<br>(36.35 to 73.93)   |
| Gabon                            | 155.15<br>(132.16 to 179.13) | 126.80<br>(112.64 to 141.22) | 102.77<br>(93.67 to 112.63)  | 85.94<br>(79.02 to 92.80)    | 75.84<br>(69.50 to 82.42)    | 66.51<br>(60.88 to 72.49)    | 61.13<br>(55.73 to 66.83)    | 56.79<br>(51.02 to 62.86)    | 47.94<br>(41.85 to 55.01)    | 37.02<br>(30.78 to 45.45)   |



Appendix Table 12A. Under-5 death numbers by location, both sexes combined, 1970, 1975, 1980, 1985, 1990, 1995, 2000, 2005, 2010, 2016

| Location                  | 1970                                     | 1975                                     | 1980                                     | 1985                                     | 1990                                     | 1995                                   | 2000                               | 2005                               | 2010                               | 2016                               |
|---------------------------|------------------------------------------|------------------------------------------|------------------------------------------|------------------------------------------|------------------------------------------|----------------------------------------|------------------------------------|------------------------------------|------------------------------------|------------------------------------|
| Global                    | 16,370 68<br>(16,056 12 to<br>16,698 02) | 14,625 48<br>(14,367 04 to<br>14,913 05) | 13,262 11<br>(13,011 64 to<br>13,507 42) | 12,263 01<br>(12,039 25 to<br>12,485 18) | 11,051 04<br>(10,832 93 to<br>11,257 59) | 9,874 87<br>(9,659 99 to<br>10,084 05) | 8,747 57<br>(8,524 34 to 8,950 23) | 7,674 69<br>(7,477 90 to 7,866 89) | 6,630 59<br>(6,422 02 to 6,842 72) | 4,999 79<br>(4,776 15 to 5,236 95) |
| High SDI                  | 1,414 05<br>(1,318 40 to 1,517 92)       | 1,134 65<br>(1,065 11 to 1,201 40)       | 949 40<br>(887 01 to 1,012 26)           | 785 33<br>(738 38 to 834 98)             | 618 13<br>(583 77 to 655 79)             | 454 55<br>(428 67 to 483 80)           | 342 01<br>(320 91 to 368 32)       | 264 64<br>(239 54 to 300 54)       | 216 02<br>(191 83 to 250 78)       | 163 17<br>(142 99 to 196 03)       |
| High-middle SDI           | 352 84<br>(344 30 to 362 93)             | 250 71<br>(243 97 to 258 47)             | 191 80<br>(186 44 to 198 16)             | 146 37<br>(143 39 to 149 79)             | 123 91<br>(121 84 to 126 84)             | 93 65<br>(92 28 to 95 20)              | 76 72<br>(76 34 to 77 12)          | 68 53<br>(68 18 to 68 89)          | 60 00<br>(59 69 to 60 34)          | 53 34<br>(51 71 to 55 18)          |
| Middle SDI                | 6,483 59<br>(6,274 02 to 6,704 36)       | 6,110 86<br>(5,920 80 to 6,298 41)       | 5,790 72<br>(5,619 04 to 5,950 07)       | 5,557 71<br>(5,392 74 to 5,711 79)       | 5,106 99<br>(4,962 34 to 5,244 88)       | 4,697 15<br>(4,538 53 to 4,858 07)     | 4,220 56<br>(4,064 83 to 4,367 81) | 3,715 53<br>(3,573 25 to 3,864 34) | 3,174 88<br>(3,016 58 to 3,340 48) | 2,275 93<br>(2,116 11 to 2,443 54) |
| Low-middle SDI            | 2,432 00<br>(2,290 70 to 2,574 74)       | 2,524 32<br>(2,389 66 to 2,649 43)       | 2,580 35<br>(2,446 81 to 2,705 03)       | 2,614 88<br>(2,484 23 to 2,752 85)       | 2,608 49<br>(2,479 03 to 2,730 48)       | 2,656 20<br>(2,500 39 to 2,787 50)     | 2,625 74<br>(2,478 97 to 2,751 11) | 2,470 87<br>(2,345 41 to 2,591 81) | 2,294 54<br>(2,151 84 to 2,431 89) | 1,904 74<br>(1,767 18 to 2,048 42) |
| Low SDI                   | 5,679 60<br>(5,509 67 to 5,850 01)       | 4,598 48<br>(4,478 62 to 4,728 93)       | 3,744 08<br>(3,632 65 to 3,858 41)       | 3,153 42<br>(3,067 88 to 3,234 87)       | 2,588 45<br>(2,523 52 to 2,655 65)       | 1,968 92<br>(1,922 10 to 2,016 55)     | 1,478 69<br>(1,444 79 to 1,511 80) | 1,151 53<br>(1,120 85 to 1,180 85) | 882 20<br>(853 21 to 910 28)       | 600 32<br>(567 87 to 636 34)       |
| High-income               | 408 91<br>(400 29 to 418 62)             | 294 25<br>(287 56 to 301 89)             | 211 98<br>(206 60 to 218 40)             | 158 77<br>(155 73 to 162 21)             | 138 51<br>(136 43 to 141 51)             | 105 58<br>(104 20 to 107 15)           | 89 17<br>(88 20 to 90 17)          | 79 96<br>(79 17 to 80 79)          | 70 71<br>(70 01 to 71 40)          | 62 78<br>(60 73 to 64 76)          |
| High-income North America | 94 67<br>(93 53 to 95 85)                | 65 81<br>(65 11 to 66 49)                | 58 92<br>(58 58 to 59 26)                | 51 32<br>(51 04 to 51 62)                | 49 06<br>(48 79 to 49 37)                | 38 86<br>(38 61 to 39 08)              | 35 19<br>(34 98 to 35 40)          | 30 98<br>(30 29 to 31 74)          | 30 82<br>(30 82 to 31 17)          | 29 64<br>(28 86 to 30 37)          |
| Canada                    | 8 20<br>(8 02 to 8 36)                   | 6 03<br>(5 90 to 6 17)                   | 4 59<br>(4 48 to 4 70)                   | 3 64<br>(3 54 to 3 73)                   | 2 72<br>(2 22 to 3 41)                   | 2 06<br>(2 05 to 2 80)                 | 2 09<br>(2 00 to 2 12)             | 2 14<br>(2 01 to 2 17)             | 2 15<br>(2 07 to 2 20)             | 2 15<br>(1 78 to 2 58)             |
| Greenland                 | 0 07<br>(0 07 to 0 08)                   | 0 04<br>(0 04 to 0 05)                   | 0 04<br>(0 04 to 0 04)                   | 0 04<br>(0 04 to 0 04)                   | 0 04<br>(0 04 to 0 05)                   | 0 03<br>(0 02 to 0 03)                 | 0 01<br>(0 01 to 0 02)             | 0 01<br>(0 01 to 0 02)             | 0 01<br>(0 01 to 0 01)             | 0 01<br>(0 01 to 0 01)             |
| United States             | 86 34<br>(85 21 to 87 53)                | 59 70<br>(59 02 to 60 40)                | 54 26<br>(53 95 to 54 58)                | 47 61<br>(47 35 to 47 89)                | 45 69<br>(45 43 to 45 97)                | 36 09<br>(35 88 to 36 30)              | 33 39<br>(32 90 to 33 31)          | 33 09<br>(33 18 to 33 61)          | 28 82<br>(28 66 to 29 00)          | 27 47<br>(26 81 to 28 08)          |
| Australasia               | 6 89<br>(6 76 to 7 01)                   | 5 17<br>(5 07 to 5 27)                   | 3 76<br>(3 68 to 3 84)                   | 3 50<br>(3 42 to 3 58)                   | 2 29<br>(2 96 to 3 11)                   | 2 00<br>(2 24 to 2 35)                 | 1 89<br>(1 95 to 2 05)             | 2 00<br>(1 83 to 1 94)             | 1 82<br>(1 77 to 1 88)             | 1 49<br>(1 32 to 1 67)             |
| Australia                 | 5 58<br>(5 46 to 5 70)                   | 4 11<br>(4 01 to 4 21)                   | 2 96<br>(2 89 to 3 04)                   | 2 79<br>(2 72 to 2 87)                   | 2 40<br>(2 33 to 2 47)                   | 1 80<br>(1 74 to 1 85)                 | 1 57<br>(1 52 to 1 62)             | 1 50<br>(1 45 to 1 55)             | 1 43<br>(1 38 to 1 48)             | 1 17<br>(1 02 to 1 35)             |
| New Zealand               | 1 30<br>(1 27 to 1 34)                   | 1 06<br>(1 03 to 1 09)                   | 0 80<br>(0 77 to 0 82)                   | 0 70<br>(0 68 to 0 73)                   | 0 64<br>(0 62 to 0 66)                   | 0 50<br>(0 48 to 0 52)                 | 0 43<br>(0 41 to 0 45)             | 0 39<br>(0 37 to 0 40)             | 0 39<br>(0 38 to 0 41)             | 0 32<br>(0 27 to 0 38)             |
| High-income Asia Pacific  | 89 50<br>(81 04 to 99 50)                | 61 19<br>(54 54 to 68 71)                | 38 53<br>(33 37 to 44 96)                | 23 16<br>(20 19 to 26 59)                | 16 47<br>(14 47 to 19 28)                | 13 04<br>(11 76 to 14 57)              | 9 63<br>(9 49 to 9 78)             | 6 77<br>(6 66 to 6 88)             | 5 47<br>(5 38 to 5 56)             | 4 13<br>(3 75 to 4 55)             |
| Brunei                    | 0 25<br>(0 24 to 0 26)                   | 0 19<br>(0 18 to 0 20)                   | 0 13<br>(0 12 to 0 14)                   | 0 09<br>(0 09 to 0 10)                   | 0 08<br>(0 07 to 0 09)                   | 0 07<br>(0 07 to 0 08)                 | 0 07<br>(0 07 to 0 08)             | 0 06<br>(0 06 to 0 07)             | 0 06<br>(0 05 to 0 06)             | 0 06<br>(0 05 to 0 07)             |
| Japan                     | 33 32<br>(32 41 to 34 17)                | 25 64<br>(25 00 to 26 25)                | 16 26<br>(16 09 to 16 42)                | 10 89<br>(10 77 to 11 01)                | 7 99<br>(7 90 to 8 09)                   | 7 13<br>(6 95 to 7 33)                 | 5 35<br>(5 28 to 5 43)             | 4 16<br>(4 09 to 4 22)             | 3 44<br>(3 38 to 3 49)             | 2 55<br>(2 45 to 2 67)             |
| Singapore                 | 1 26<br>(1 22 to 1 30)                   | 0 77<br>(0 74 to 0 80)                   | 0 60<br>(0 58 to 0 63)                   | 0 45<br>(0 43 to 0 47)                   | 0 36<br>(0 35 to 0 38)                   | 0 25<br>(0 23 to 0 26)                 | 0 17<br>(0 16 to 0 18)             | 0 11<br>(0 10 to 0 12)             | 0 10<br>(0 09 to 0 10)             | 0 08<br>(0 06 to 0 10)             |
| South Korea               | 54 67<br>(46 43 to 64 39)                | 34 60<br>(27 94 to 41 81)                | 21 54<br>(16 42 to 28 03)                | 11 72<br>(8 78 to 15 10)                 | 8 03<br>(6 05 to 10 87)                  | 5 59<br>(4 38 to 7 02)                 | 4 04<br>(3 92 to 4 16)             | 2 44<br>(2 36 to 2 53)             | 1 87<br>(1 80 to 1 95)             | 1 43<br>(1 08 to 1 84)             |
| Western Europe            | 152 52<br>(151 59 to 153 48)             | 104 42<br>(103 77 to 105 10)             | 71 56<br>(71 02 to 72 12)                | 51 24<br>(50 88 to 51 63)                | 42 75<br>(42 38 to 43 11)                | 29 85<br>(29 55 to 30 13)              | 24 77<br>(24 52 to 25 01)          | 21 34<br>(21 12 to 21 56)          | 19 46<br>(19 27 to 19 66)          | 16 35<br>(15 12 to 17 67)          |
| Andorra                   | <0 01<br>(<0 01 to <0 01)                | <0 01<br>(<0 01 to <0 01)                | <0 01<br>(<0 01 to <0 01)                | <0 01<br>(<0 01 to <0 01)                | <0 01<br>(<0 01 to <0 01)                | <0 01<br>(<0 01 to <0 01)              | <0 01<br>(<0 01 to <0 01)          | <0 01<br>(<0 01 to <0 01)          | <0 01<br>(<0 01 to <0 01)          | <0 01<br>(<0 01 to <0 01)          |
| Austria                   | 3 35<br>(3 25 to 3 45)                   | 2 23<br>(2 15 to 2 30)                   | 1 52<br>(1 46 to 1 59)                   | 0 87<br>(1 10 to 1 20)                   | 0 61<br>(0 83 to 0 92)                   | 0 45<br>(0 58 to 0 65)                 | 0 39<br>(0 42 to 0 48)             | 0 36<br>(0 36 to 0 41)             | 0 28<br>(0 33 to 0 38)             | 0 28<br>(0 21 to 0 36)             |
| Belgium                   | 3 47<br>(3 41 to 3 53)                   | 2 30<br>(2 26 to 2 35)                   | 1 81<br>(1 76 to 1 85)                   | 1 36<br>(1 32 to 1 40)                   | 1 23<br>(1 20 to 1 26)                   | 0 89<br>(0 87 to 0 92)                 | 0 68<br>(0 66 to 0 70)             | 0 59<br>(0 57 to 0 61)             | 0 57<br>(0 55 to 0 59)             | 0 51<br>(0 43 to 0 61)             |
| Cyprus                    | 0 55<br>(0 49 to 0 63)                   | 0 33<br>(0 31 to 0 34)                   | 0 25<br>(0 24 to 0 26)                   | 0 19<br>(0 18 to 0 19)                   | 0 15<br>(0 15 to 0 16)                   | 0 11<br>(0 10 to 0 11)                 | 0 07<br>(0 06 to 0 07)             | 0 05<br>(0 05 to 0 06)             | 0 04<br>(0 04 to 0 05)             | 0 03<br>(0 03 to 0 04)             |
| Denmark                   | 1 24<br>(1 19 to 1 29)                   | 0 88<br>(0 84 to 0 92)                   | 0 59<br>(0 56 to 0 62)                   | 0 51<br>(0 49 to 0 54)                   | 0 46<br>(0 54 to 0 59)                   | 0 32<br>(0 43 to 0 48)                 | 0 26<br>(0 35 to 0 40)             | 0 23<br>(0 30 to 0 34)             | 0 20<br>(0 24 to 0 27)             | 0 13<br>(0 19 to 0 30)             |
| Finland                   | 1 05<br>(1 00 to 1 11)                   | 0 82<br>(0 77 to 0 87)                   | 0 56<br>(0 53 to 0 60)                   | 0 46<br>(0 43 to 0 49)                   | 0 44<br>(0 41 to 0 48)                   | 0 32<br>(0 29 to 0 34)                 | 0 24<br>(0 22 to 0 27)             | 0 23<br>(0 21 to 0 25)             | 0 18<br>(0 16 to 0 20)             | 0 13<br>(0 10 to 0 17)             |
| France                    | 15 61<br>(15 35 to 15 88)                | 12 33<br>(12 11 to 12 55)                | 9 78<br>(9 58 to 10 01)                  | 7 70<br>(7 53 to 7 86)                   | 6 76<br>(6 60 to 6 92)                   | 4 45<br>(4 32 to 4 58)                 | 4 13<br>(4 00 to 4 26)             | 3 44<br>(3 33 to 3 55)             | 3 34<br>(3 24 to 3 45)             | 3 03<br>(2 36 to 3 88)             |
| Germany                   | 27 61<br>(27 20 to 28 02)                | 17 43<br>(17 08 to 17 78)                | 12 84<br>(12 57 to 13 12)                | 9 07<br>(8 87 to 9 29)                   | 7 83<br>(7 63 to 8 03)                   | 5 09<br>(4 95 to 5 23)                 | 4 10<br>(3 98 to 4 22)             | 3 29<br>(3 19 to 3 40)             | 2 81<br>(2 72 to 2 91)             | 2 53<br>(2 00 to 3 24)             |
| Greece                    | 4 87<br>(4 76 to 4 99)                   | 3 80<br>(3 71 to 3 89)                   | 2 90<br>(2 83 to 2 98)                   | 1 79<br>(1 73 to 1 84)                   | 1 10<br>(1 06 to 1 15)                   | 0 89<br>(0 86 to 0 93)                 | 0 65<br>(0 62 to 0 68)             | 0 50<br>(0 48 to 0 52)             | 0 46<br>(0 44 to 0 48)             | 0 36<br>(0 28 to 0 46)             |
| Iceland                   | 0 07<br>(0 06 to 0 07)                   | 0 06<br>(0 05 to 0 06)                   | 0 04<br>(0 04 to 0 05)                   | 0 03<br>(0 03 to 0 03)                   | 0 03<br>(0 03 to 0 03)                   | 0 03<br>(0 02 to 0 03)                 | 0 03<br>(0 01 to 0 02)             | 0 01<br>(0 01 to 0 02)             | 0 01<br>(0 01 to 0 01)             | 0 01<br>(0 01 to 0 01)             |
| Ireland                   | 1 47<br>(1 42 to 1 53)                   | 1 36<br>(1 31 to 1 42)                   | 1 02<br>(0 98 to 1 07)                   | 0 67<br>(0 64 to 0 70)                   | 0 50<br>(0 48 to 0 53)                   | 0 36<br>(0 34 to 0 39)                 | 0 31<br>(0 38 to 0 42)             | 0 31<br>(0 29 to 0 33)             | 0 25<br>(0 30 to 0 34)             | 0 25<br>(0 18 to 0 35)             |
| Israel                    | 2 25<br>(2 08 to 2 44)                   | 2 54<br>(2 45 to 2 63)                   | 1 73<br>(1 67 to 1 80)                   | 1 45<br>(1 38 to 1 50)                   | 1 22<br>(1 17 to 1 27)                   | 1 00<br>(0 96 to 1 05)                 | 0 92<br>(0 89 to 0 97)             | 0 82<br>(0 78 to 0 85)             | 0 75<br>(0 71 to 0 78)             | 0 61<br>(0 53 to 0 70)             |
| Italy                     | 30 09<br>(29 67 to 30 56)                | 19 40<br>(19 06 to 19 73)                | 10 76<br>(10 51 to 11 01)                | 6 92<br>(6 74 to 7 10)                   | 5 31<br>(5 15 to 5 47)                   | 3 90<br>(3 78 to 4 03)                 | 2 87<br>(2 77 to 2 98)             | 2 37<br>(2 28 to 2 47)             | 2 20<br>(2 12 to 2 29)             | 1 60<br>(1 12 to 2 26)             |
| Luxembourg                | 0 11<br>(0 10 to 0 11)                   | 0 07<br>(0 06 to 0 07)                   | 0 06<br>(0 05 to 0 06)                   | 0 05<br>(0 04 to 0 05)                   | 0 04<br>(0 04 to 0 05)                   | 0 03<br>(0 03 to 0 04)                 | 0 03<br>(0 02 to 0 03)             | 0 02<br>(0 02 to 0 02)             | 0 02<br>(0 01 to 0 02)             | 0 01<br>(0 01 to 0 02)             |
| Malta                     | 0 15<br>(0 14 to 0 16)                   | 0 12<br>(0 11 to 0 13)                   | 0 09<br>(0 09 to 0 10)                   | 0 08<br>(0 07 to 0 09)                   | 0 06<br>(0 06 to 0 07)                   | 0 05<br>(0 04 to 0 05)                 | 0 03<br>(0 03 to 0 04)             | 0 03<br>(0 02 to 0 03)             | 0 03<br>(0 03 to 0 03)             | 0 02<br>(0 02 to 0 03)             |
| Netherlands               | 3 78<br>(3 66 to 3 91)                   | 2 47<br>(2 39 to 2 55)                   | 1 93<br>(1 87 to 2 00)                   | 1 75<br>(1 68 to 1 82)                   | 1 69<br>(1 62 to 1 75)                   | 1 33<br>(1 24 to 1 39)                 | 1 29<br>(1 24 to 1 34)             | 1 06<br>(1 01 to 1 11)             | 0 82<br>(0 78 to 0 85)             | 0 67<br>(0 54 to 0 84)             |
| Norway                    | 1 07<br>(1 02 to 1 11)                   | 0 76<br>(0 73 to 0 80)                   | 0 52<br>(0 49 to 0 55)                   | 0 53<br>(0 50 to 0 56)                   | 0 52<br>(0 49 to 0 54)                   | 0 34<br>(0 32 to 0 36)                 | 0 29<br>(0 27 to 0 31)             | 0 23<br>(0 22 to 0 25)             | 0 20<br>(0 18 to 0 21)             | 0 17<br>(0 13 to 0 21)             |
| Portugal                  | 11 95<br>(11 82 to 12 08)                | 7 64<br>(7 46 to 7 84)                   | 4 54<br>(4 47 to 4 61)                   | 2 73<br>(2 68 to 2 77)                   | 1 66<br>(1 63 to 1 70)                   | 1 06<br>(1 03 to 1 09)                 | 0 81<br>(0 79 to 0 83)             | 0 54<br>(0 52 to 0 56)             | 0 38<br>(0 37 to 0 39)             | 0 26<br>(0 22 to 0 30)             |
| Spain                     | 21 12<br>(20 79 to 21 48)                | 14 67<br>(14 40 to 14 94)                | 8 56<br>(8 38 to 8 74)                   | 5 04<br>(4 90 to 5 18)                   | 3 74<br>(3 63 to 3 85)                   | 2 53<br>(2 44 to 2 62)                 | 2 09<br>(2 01 to 2 18)             | 2 11<br>(2 04 to 2 20)             | 1 87<br>(1 80 to 1 95)             | 1 40<br>(1 03 to 1 87)             |
| Sweden                    | 1 48<br>(1 38 to 1 59)                   | 1 08<br>(1 00 to 1 15)                   | 0 78<br>(0 74 to 0 82)                   | 0 70<br>(0 66 to 0 74)                   | 0 83<br>(0 79 to 0 88)                   | 0 49<br>(0 47 to 0 52)                 | 0 36<br>(0 33 to 0 38)             | 0 35<br>(0 32 to 0 37)             | 0 36<br>(0 33 to 0 38)             | 0 31<br>(0 24 to 0 40)             |
| Stockholm                 | 0 21<br>(0 16 to 0 28)                   | 0 16<br>(0 12 to 0 21)                   | 0 13<br>(0 11 to 0 14)                   | 0 11<br>(0 10 to 0 13)                   | 0 14<br>(0 13 to 0 16)                   | 0 09<br>(0 08 to 0 10)                 | 0 07<br>(0 06 to 0 08)             | 0 07<br>(0 06 to 0 08)             | 0 06<br>(0 06 to 0 07)             | 0 06<br>(0 05 to 0 08)             |
| Sweden except Stockholm   | 1 27<br>(1 19 to 1 35)                   | 0 91<br>(0 85 to 0 98)                   | 0 65<br>(0 61 to 0 69)                   | 0 58<br>(0 55 to 0 62)                   | 0 69<br>(0 65 to 0 73)                   | 0 40<br>(0 38 to 0 42)                 | 0 29<br>(0 27 to 0 31)             | 0 28<br>(0 26 to 0 30)             | 0 29<br>(0 27 to 0 32)             | 0 25<br>(0 18 to 0 33)             |
| Switzerland               | 1 81<br>(1 76 to 1 87)                   | 1 09<br>(1 05 to 1 13)                   | 0 76<br>(0 73 to 0 80)                   | 0 66<br>(0 63 to 0 69)                   | 0 70<br>(0 67 to 0 73)                   | 0 52<br>(0 49 to 0 54)                 | 0 45<br>(0 42 to 0 47)             | 0 37<br>(0 35 to 0 39)             | 0 35<br>(0 34 to 0 38)             | 0 34<br>(0 26 to 0 44)             |
| United Kingdom            | 19 30<br>(18 87 to 19 74)                | 12 97<br>(12 68 to 13 26)                | 10 44<br>(10 29 to 10 59)                | 8 37<br>(8 29 to 8 46)                   | 7 44<br>(7 36 to 7 52)                   | 5 36<br>(5 30 to 5 43)                 | 4 49<br>(4 44 to 4 55)             | 4 30<br>(4 25 to 4 35)             | 4 12<br>(4 07 to 4 17)             | 3 57<br>(3 46 to 3 68)             |
| England                   | 15 33<br>(15 03 to 15 62)                | 10 28<br>(10 07 to 10 50)                | 8 42<br>(8 31 to 8 54)                   | 6 85<br>(6 79 to 6 92)                   | 6 26<br>(6 19 to 6 32)                   | 4 47<br>(4 42 to 4 52)                 | 3 80<br>(3 75 to 3 84)             | 3 66<br>(3 61 to 3 70)             | 3 53<br>(3 49 to 3 57)             | 3 07<br>(3 01 to 3 13)             |
| East Midlands             | 1 18<br>(1 14 to 1 23)                   | 0 82<br>(0 79 to 0 86)                   | 0 68<br>(0 65 to 0 70)                   | 0 52<br>(0 50 to 0 54)                   | 0 51<br>(0 49 to 0 52)                   | 0 35<br>(0 34 to 0 37)                 | 0 30<br>(0 29 to 0 31)             | 0 29<br>(0 28                      |                                    |                                    |

Appendix Table 12A. Under-5 death numbers by location, both sexes combined, 1970, 1975, 1980, 1985, 1990, 1995, 2000, 2005, 2010, 2016

| Location                                         | 1970                               | 1975                         | 1980                         | 1985                         | 1990                         | 1995                         | 2000                         | 2005                         | 2010                         | 2016                         |
|--------------------------------------------------|------------------------------------|------------------------------|------------------------------|------------------------------|------------------------------|------------------------------|------------------------------|------------------------------|------------------------------|------------------------------|
| West Midlands                                    | 1 99<br>(1 86 to 2 12)             | 1 30<br>(1 20 to 1 42)       | 1 05<br>(1 00 to 1 10)       | 0 86<br>(0 83 to 0 89)       | 0 84<br>(0 81 to 0 87)       | 0 55<br>(0 53 to 0 57)       | 0 49<br>(0 47 to 0 51)       | 0 50<br>(0 48 to 0 52)       | 0 47<br>(0 45 to 0 49)       | 0 47<br>(0 43 to 0 51)       |
| Yorkshire and the Humber                         | 1 76<br>(1 67 to 1 84)             | 1 17<br>(1 10 to 1 23)       | 0 95<br>(0 92 to 0 99)       | 0 77<br>(0 75 to 0 79)       | 0 68<br>(0 66 to 0 71)       | 0 52<br>(0 50 to 0 54)       | 0 44<br>(0 43 to 0 46)       | 0 43<br>(0 41 to 0 44)       | 0 38<br>(0 37 to 0 40)       | 0 34<br>(0 32 to 0 35)       |
| Northern Ireland                                 | 0 84<br>(0 77 to 0 91)             | 0 62<br>(0 58 to 0 66)       | 0 47<br>(0 44 to 0 50)       | 0 34<br>(0 32 to 0 37)       | 0 25<br>(0 23 to 0 27)       | 0 20<br>(0 18 to 0 22)       | 0 14<br>(0 13 to 0 16)       | 0 15<br>(0 14 to 0 16)       | 0 15<br>(0 14 to 0 17)       | 0 11<br>(0 08 to 0 16)       |
| Scotland                                         | 2 04<br>(1 97 to 2 10)             | 1 36<br>(1 31 to 1 41)       | 0 98<br>(0 94 to 1 02)       | 0 76<br>(0 72 to 0 79)       | 0 62<br>(0 59 to 0 65)       | 0 45<br>(0 42 to 0 47)       | 0 35<br>(0 33 to 0 37)       | 0 32<br>(0 30 to 0 34)       | 0 27<br>(0 25 to 0 29)       | 0 24<br>(0 17 to 0 32)       |
| Wales                                            | 1 09<br>(0 83 to 1 43)             | 0 72<br>(0 55 to 0 93)       | 0 57<br>(0 50 to 0 65)       | 0 42<br>(0 39 to 0 44)       | 0 31<br>(0 29 to 0 33)       | 0 24<br>(0 23 to 0 26)       | 0 20<br>(0 19 to 0 22)       | 0 17<br>(0 16 to 0 19)       | 0 17<br>(0 16 to 0 18)       | 0 15<br>(0 12 to 0 19)       |
| Southern Latin America                           | 65 34<br>(64 69 to 65 98)          | 57 66<br>(56 52 to 58 89)    | 39 22<br>(38 89 to 39 55)    | 29 56<br>(29 27 to 29 85)    | 27 20<br>(26 92 to 27 48)    | 21 55<br>(21 29 to 21 80)    | 17 59<br>(16 67 to 18 50)    | 14 46<br>(13 72 to 15 20)    | 12 97<br>(12 34 to 13 61)    | 11 18<br>(9 87 to 12 62)     |
| Argentina                                        | 38 59<br>(37 99 to 39 19)          | 37 56<br>(36 43 to 38 79)    | 27 78<br>(27 47 to 28 08)    | 21 56<br>(21 32 to 21 81)    | 20 10<br>(19 85 to 20 34)    | 16 43<br>(16 21 to 16 66)    | 13 92<br>(13 00 to 14 83)    | 11 52<br>(10 80 to 12 25)    | 10 24<br>(9 63 to 10 87)     | 8 85<br>(7 65 to 10 23)      |
| Chile                                            | 23 67<br>(23 44 to 23 89)          | 16 93<br>(16 74 to 17 14)    | 9 23<br>(9 11 to 9 36)       | 6 24<br>(6 15 to 6 34)       | 5 80<br>(5 71 to 5 89)       | 3 88<br>(3 81 to 3 95)       | 2 80<br>(2 76 to 2 85)       | 2 25<br>(2 19 to 2 30)       | 2 22<br>(2 04 to 2 39)       | 1 89<br>(1 55 to 2 30)       |
| Uruguay                                          | 3 08<br>(2 98 to 3 17)             | 3 17<br>(3 08 to 3 27)       | 2 21<br>(2 14 to 2 30)       | 1 75<br>(1 68 to 1 83)       | 1 29<br>(1 23 to 1 36)       | 1 23<br>(1 13 to 1 34)       | 0 87<br>(0 80 to 0 93)       | 0 69<br>(0 63 to 0 76)       | 0 51<br>(0 44 to 0 59)       | 0 43<br>(0 28 to 0 62)       |
| Central Europe, Eastern Europe, and Central Asia | 331 20<br>(310 30 to 353 87)       | 302 38<br>(287 52 to 317 29) | 281 62<br>(270 66 to 294 07) | 270 62<br>(261 68 to 280 42) | 218 86<br>(211 32 to 226 58) | 172 51<br>(165 91 to 180 10) | 126 45<br>(120 24 to 133 21) | 105 52<br>(97 42 to 114 92)  | 92 92<br>(82 94 to 105 15)   | 77 55<br>(67 27 to 91 46)    |
| Eastern Europe                                   | 96 57<br>(86 13 to 110 34)         | 100 50<br>(91 89 to 111 24)  | 96 34<br>(90 20 to 103 63)   | 91 77<br>(88 06 to 96 51)    | 64 58<br>(61 72 to 67 78)    | 47 79<br>(45 49 to 50 26)    | 37 11<br>(35 07 to 39 58)    | 29 03<br>(27 23 to 31 23)    | 24 58<br>(23 01 to 26 56)    | 21 75<br>(19 33 to 24 79)    |
| Belarus                                          | 5 36<br>(4 28 to 6 61)             | 4 44<br>(3 59 to 5 34)       | 4 06<br>(3 32 to 4 89)       | 4 00<br>(3 34 to 4 77)       | 3 00<br>(2 50 to 3 60)       | 2 01<br>(1 66 to 2 41)       | 1 51<br>(1 23 to 1 82)       | 1 09<br>(0 88 to 1 35)       | 0 86<br>(0 67 to 1 09)       | 0 64<br>(0 48 to 0 86)       |
| Estonia                                          | 0 47<br>(0 44 to 0 49)             | 0 47<br>(0 44 to 0 50)       | 0 50<br>(0 47 to 0 53)       | 0 48<br>(0 45 to 0 51)       | 0 37<br>(0 35 to 0 40)       | 0 26<br>(0 24 to 0 28)       | 0 15<br>(0 13 to 0 16)       | 0 10<br>(0 09 to 0 12)       | 0 07<br>(0 06 to 0 08)       | 0 04<br>(0 03 to 0 06)       |
| Latvia                                           | 0 76<br>(0 71 to 0 80)             | 0 89<br>(0 84 to 0 94)       | 0 76<br>(0 72 to 0 80)       | 0 71<br>(0 66 to 0 75)       | 0 66<br>(0 63 to 0 70)       | 0 47<br>(0 44 to 0 50)       | 0 26<br>(0 24 to 0 28)       | 0 21<br>(0 19 to 0 23)       | 0 16<br>(0 14 to 0 18)       | 0 11<br>(0 07 to 0 16)       |
| Lithuania                                        | 1 28<br>(1 23 to 1 34)             | 1 25<br>(1 19 to 1 31)       | 0 98<br>(0 94 to 1 02)       | 1 09<br>(1 04 to 1 14)       | 0 78<br>(0 75 to 0 82)       | 0 66<br>(0 63 to 0 69)       | 0 39<br>(0 36 to 0 41)       | 0 26<br>(0 24 to 0 28)       | 0 19<br>(0 18 to 0 20)       | 0 14<br>(0 11 to 0 17)       |
| Moldova                                          | 5 40<br>(3 55 to 7 89)             | 5 00<br>(3 35 to 7 02)       | 4 80<br>(3 78 to 5 96)       | 3 99<br>(3 25 to 4 80)       | 2 59<br>(2 11 to 3 12)       | 2 04<br>(1 69 to 2 47)       | 1 37<br>(1 10 to 1 67)       | 0 76<br>(0 58 to 0 97)       | 0 74<br>(0 55 to 0 95)       | 0 52<br>(0 35 to 0 76)       |
| Russia                                           | 53 51<br>(52 92 to 54 17)          | 61 84<br>(61 14 to 62 54)    | 61 25<br>(60 54 to 62 03)    | 62 76<br>(61 98 to 63 59)    | 43 44<br>(42 99 to 43 92)    | 31 75<br>(31 28 to 32 26)    | 25 22<br>(24 64 to 25 85)    | 19 91<br>(19 63 to 20 21)    | 16 87<br>(16 66 to 17 10)    | 15 82<br>(14 49 to 17 27)    |
| Ukraine                                          | 29 80<br>(19 16 to 43 24)          | 26 62<br>(18 34 to 37 04)    | 23 98<br>(18 06 to 31 06)    | 18 76<br>(15 12 to 23 25)    | 13 72<br>(11 10 to 16 81)    | 10 60<br>(8 47 to 13 04)     | 8 22<br>(6 37 to 10 45)      | 6 68<br>(5 11 to 8 80)       | 5 69<br>(4 18 to 7 58)       | 4 48<br>(2 51 to 7 46)       |
| Central Europe                                   | 85 08<br>(80 79 to 90 35)          | 72 44<br>(68 96 to 76 42)    | 59 14<br>(56 67 to 61 93)    | 48 12<br>(46 44 to 49 85)    | 37 52<br>(36 56 to 38 50)    | 25 55<br>(24 97 to 26 12)    | 16 33<br>(15 88 to 16 81)    | 12 22<br>(11 86 to 12 61)    | 9 30<br>(9 03 to 9 60)       | 8 86<br>(5 91 to 8 02)       |
| Albania                                          | 6 21<br>(3 57 to 10 34)            | 4 91<br>(2 90 to 7 78)       | 4 35<br>(3 01 to 6 11)       | 4 30<br>(3 49 to 5 22)       | 3 46<br>(2 89 to 4 07)       | 2 64<br>(2 21 to 3 12)       | 1 45<br>(1 18 to 1 77)       | 0 86<br>(0 66 to 1 11)       | 0 61<br>(0 42 to 0 88)       | 0 54<br>(0 32 to 0 84)       |
| Bosnia and Herzegovina                           | 4 60<br>(3 32 to 6 35)             | 3 33<br>(2 48 to 4 40)       | 2 39<br>(1 91 to 3 00)       | 1 96<br>(1 86 to 2 06)       | 1 20<br>(1 15 to 1 25)       | 1 17<br>(1 04 to 1 33)       | 0 38<br>(0 36 to 0 40)       | 0 29<br>(0 27 to 0 31)       | 0 24<br>(0 22 to 0 25)       | 0 17<br>(0 13 to 0 22)       |
| Bulgaria                                         | 4 39<br>(4 25 to 4 53)             | 3 96<br>(3 83 to 4 09)       | 3 15<br>(3 05 to 3 26)       | 2 30<br>(2 21 to 2 39)       | 1 94<br>(1 87 to 2 03)       | 1 37<br>(1 30 to 1 43)       | 1 17<br>(1 11 to 1 24)       | 0 90<br>(0 85 to 0 96)       | 0 82<br>(0 77 to 0 87)       | 0 55<br>(0 33 to 0 88)       |
| Croatia                                          | 2 35<br>(1 64 to 3 29)             | 1 87<br>(1 37 to 2 44)       | 1 51<br>(1 22 to 1 86)       | 1 17<br>(1 11 to 1 23)       | 0 70<br>(0 67 to 0 74)       | 0 60<br>(0 54 to 0 65)       | 0 38<br>(0 36 to 0 40)       | 0 28<br>(0 26 to 0 30)       | 0 23<br>(0 21 to 0 24)       | 0 17<br>(0 14 to 0 20)       |
| Czech Republic                                   | 3 49<br>(3 36 to 3 61)             | 4 08<br>(3 96 to 4 21)       | 2 90<br>(2 79 to 3 02)       | 1 96<br>(1 87 to 2 03)       | 1 56<br>(1 48 to 1 63)       | 0 88<br>(0 83 to 0 93)       | 0 48<br>(0 44 to 0 51)       | 0 43<br>(0 40 to 0 46)       | 0 40<br>(0 37 to 0 43)       | 0 30<br>(0 23 to 0 41)       |
| Hungary                                          | 6 03<br>(5 88 to 6 19)             | 6 87<br>(6 70 to 7 05)       | 3 77<br>(3 67 to 3 89)       | 2 93<br>(2 83 to 3 03)       | 2 16<br>(2 07 to 2 24)       | 1 39<br>(1 33 to 1 46)       | 1 02<br>(0 97 to 1 07)       | 0 73<br>(0 68 to 0 78)       | 0 55<br>(0 51 to 0 58)       | 0 50<br>(0 37 to 0 68)       |
| Macedonia                                        | 2 91<br>(1 61 to 4 82)             | 2 32<br>(1 24 to 3 88)       | 2 16<br>(1 50 to 3 04)       | 1 63<br>(1 17 to 2 21)       | 1 24<br>(1 18 to 1 30)       | 0 77<br>(0 73 to 0 82)       | 0 40<br>(0 37 to 0 44)       | 0 32<br>(0 30 to 0 35)       | 0 23<br>(0 21 to 0 25)       | 0 22<br>(0 14 to 0 33)       |
| Montenegro                                       | 0 36<br>(0 24 to 0 54)             | 0 30<br>(0 20 to 0 46)       | 0 25<br>(0 16 to 0 38)       | 0 21<br>(0 13 to 0 31)       | 0 15<br>(0 11 to 0 20)       | 0 14<br>(0 12 to 0 16)       | 0 14<br>(0 13 to 0 15)       | 0 08<br>(0 08 to 0 09)       | 0 05<br>(0 05 to 0 06)       | 0 04<br>(0 03 to 0 05)       |
| Poland                                           | 20 42<br>(20 08 to 20 76)          | 18 22<br>(17 88 to 18 59)    | 16 77<br>(16 47 to 17 11)    | 14 07<br>(13 69 to 14 45)    | 10 02<br>(9 80 to 10 25)     | 6 70<br>(6 52 to 6 89)       | 3 57<br>(3 44 to 3 71)       | 2 74<br>(2 64 to 2 85)       | 2 37<br>(2 26 to 2 48)       | 1 68<br>(0 99 to 2 72)       |
| Romania                                          | 24 61<br>(24 22 to 24 99)          | 17 59<br>(17 27 to 17 90)    | 14 26<br>(14 02 to 14 53)    | 11 47<br>(11 22 to 11 71)    | 10 89<br>(10 66 to 11 13)    | 6 18<br>(5 99 to 6 37)       | 5 14<br>(4 97 to 5 29)       | 3 88<br>(3 72 to 4 05)       | 2 44<br>(2 35 to 2 54)       | 1 66<br>(1 35 to 2 07)       |
| Serbia                                           | 6 44<br>(4 26 to 9 24)             | 5 66<br>(3 83 to 8 10)       | 4 81<br>(3 32 to 6 65)       | 4 07<br>(2 92 to 5 41)       | 2 82<br>(2 18 to 3 61)       | 2 80<br>(2 70 to 2 90)       | 1 56<br>(1 28 to 1 87)       | 1 17<br>(0 97 to 1 41)       | 0 88<br>(0 83 to 0 93)       | 0 64<br>(0 53 to 0 76)       |
| Slovakia                                         | 2 45<br>(2 36 to 2 54)             | 2 67<br>(2 58 to 2 78)       | 2 25<br>(2 17 to 2 34)       | 1 66<br>(1 59 to 1 74)       | 1 15<br>(1 09 to 1 21)       | 0 78<br>(0 74 to 0 83)       | 0 53<br>(0 50 to 0 57)       | 0 46<br>(0 43 to 0 50)       | 0 41<br>(0 38 to 0 44)       | 0 34<br>(0 23 to 0 49)       |
| Slovenia                                         | 0 81<br>(0 58 to 1 12)             | 0 67<br>(0 51 to 0 88)       | 0 55<br>(0 47 to 0 63)       | 0 39<br>(0 37 to 0 41)       | 0 23<br>(0 22 to 0 25)       | 0 14<br>(0 13 to 0 15)       | 0 10<br>(0 09 to 0 11)       | 0 08<br>(0 07 to 0 09)       | 0 07<br>(0 06 to 0 08)       | 0 05<br>(0 04 to 0 06)       |
| Central Asia                                     | 149 56<br>(133 03 to 167 45)       | 129 44<br>(118 97 to 140 67) | 126 13<br>(117 33 to 136 11) | 130 73<br>(122 53 to 139 39) | 116 76<br>(109 81 to 124 38) | 99 17<br>(92 95 to 106 08)   | 73 02<br>(67 23 to 79 48)    | 64 27<br>(56 55 to 73 08)    | 59 04<br>(49 26 to 71 16)    | 48 95<br>(39 27 to 61 62)    |
| Armenia                                          | 6 69<br>(4 60 to 9 47)             | 5 64<br>(4 36 to 7 30)       | 5 68<br>(4 77 to 6 79)       | 5 01<br>(4 33 to 5 82)       | 3 65<br>(3 15 to 4 23)       | 2 16<br>(1 84 to 2 52)       | 1 16<br>(0 97 to 1 38)       | 0 91<br>(0 70 to 1 16)       | 0 70<br>(0 54 to 0 90)       | 0 55<br>(0 39 to 0 74)       |
| Azerbaijan                                       | 18 75<br>(12 95 to 25 60)          | 13 91<br>(10 21 to 18 65)    | 14 34<br>(11 46 to 17 82)    | 15 62<br>(13 07 to 18 33)    | 14 64<br>(12 24 to 17 31)    | 12 20<br>(10 32 to 14 41)    | 8 00<br>(6 76 to 9 48)       | 7 81<br>(6 24 to 9 61)       | 7 60<br>(5 49 to 10 05)      | 5 73<br>(3 76 to 8 37)       |
| Georgia                                          | 9 17<br>(6 94 to 11 94)            | 7 25<br>(5 78 to 9 00)       | 5 56<br>(4 50 to 6 78)       | 4 69<br>(3 98 to 5 47)       | 3 89<br>(3 38 to 4 45)       | 2 65<br>(2 31 to 3 05)       | 1 96<br>(1 69 to 2 26)       | 1 61<br>(1 29 to 1 99)       | 1 39<br>(1 04 to 1 81)       | 1 01<br>(0 73 to 1 39)       |
| Kazakhstan                                       | 24 12<br>(17 46 to 31 67)          | 21 26<br>(17 59 to 25 60)    | 19 20<br>(16 32 to 22 15)    | 17 37<br>(15 26 to 19 64)    | 14 30<br>(12 54 to 16 05)    | 11 94<br>(10 13 to 13 98)    | 8 92<br>(7 31 to 10 73)      | 8 61<br>(6 77 to 10 75)      | 7 52<br>(5 93 to 9 33)       | 5 33<br>(3 88 to 7 15)       |
| Kyrgyzstan                                       | 13 28<br>(10 64 to 16 65)          | 10 90<br>(9 15 to 12 87)     | 10 12<br>(8 77 to 11 55)     | 10 19<br>(9 16 to 11 22)     | 8 55<br>(7 88 to 9 26)       | 6 37<br>(4 58 to 6 93)       | 5 02<br>(4 58 to 5 50)       | 4 52<br>(4 07 to 5 02)       | 4 93<br>(4 35 to 5 55)       | 4 44<br>(3 56 to 5 38)       |
| Mongolia                                         | 7 92<br>(6 19 to 9 83)             | 7 42<br>(5 87 to 9 08)       | 7 61<br>(6 20 to 9 12)       | 7 61<br>(6 56 to 8 68)       | 6 42<br>(5 70 to 7 16)       | 4 16<br>(3 67 to 4 70)       | 2 81<br>(2 46 to 3 17)       | 2 08<br>(1 78 to 2 41)       | 1 94<br>(1 62 to 2 29)       | 1 65<br>(1 23 to 2 13)       |
| Tajikistan                                       | 21 07<br>(16 05 to 27 30)          | 19 99<br>(16 35 to 24 32)    | 18 61<br>(15 83 to 21 67)    | 20 25<br>(17 51 to 23 38)    | 19 42<br>(16 70 to 22 38)    | 16 39<br>(14 19 to 18 80)    | 11 92<br>(9 87 to 14 47)     | 9 01<br>(7 50 to 10 90)      | 8 79<br>(6 86 to 11 07)      | 9 41<br>(5 86 to 14 34)      |
| Turkmenistan                                     | 12 35<br>(8 40 to 17 22)           | 11 10<br>(7 48 to 15 54)     | 10 69<br>(8 36 to 13 60)     | 11 30<br>(9 34 to 13 41)     | 11 40<br>(9 61 to 13 32)     | 10 50<br>(8 77 to 12 64)     | 8 28<br>(6 11 to 11 00)      | 6 73<br>(4 67 to 9 10)       | 5 62<br>(3 69 to 7 91)       | 4 47<br>(2 94 to 6 54)       |
| Uzbekistan                                       | 36 21<br>(25 53 to 49 03)          | 31 96<br>(25 07 to 39 87)    | 34 32<br>(28 01 to 41 33)    | 38 70<br>(32 77 to 45 40)    | 34 49<br>(29 15 to 40 13)    | 32 80<br>(28 11 to 38 45)    | 24 95<br>(20 38 to 30 26)    | 22 97<br>(16 47 to 30 96)    | 20 55<br>(12 04 to 31 61)    | 16 37<br>(8 64 to 27 70)     |
| Latin America and Caribbean                      | 1 042 38<br>(1 014 49 to 1 070 47) | 948 91<br>(927 56 to 970 02) | 830 07<br>(810 87 to 851 00) | 700 91<br>(685 98 to 716 06) | 573 03<br>(559 62 to 586 71) | 461 77<br>(451 04 to 473 57) | 358 67<br>(347 13 to 370 54) | 291 18<br>(281 69 to 301 35) | 267 10<br>(243 22 to 293 75) | 185 21<br>(175 07 to 197 95) |
| Central Latin America                            | 390 40<br>(380 45 to 400 83)       | 356 70<br>(347 76 to 366 17) | 304 44<br>(296 66 to 312 88) | 257 48<br>(251 11 to 264 56) | 217 96<br>(211 77 to 224 12) | 184 61<br>(179 52 to 189 58) | 147 85<br>(143 01 to 152 64) | 119 61<br>(115 39 to 124 35) | 98 17<br>(93 97 to 102 51)   | 75 72<br>(71 77 to 80 32)    |
| Colombia                                         | 63 13<br>(57 42 to 69 60)          | 54 55<br>(49 55 to 59 64)    | 42 27<br>(37 85 to 46 60)    | 37 48<br>(33 57 to 41 53)    | 30 36<br>(26 41 to 34 59)    | 27 28<br>(24 38 to 30 23)    | 22 60<br>(20 22 to 25 10)    | 19 75<br>(17 40 to 22 65)    | 15 98<br>(13 42 to 18 92)    | 10 65<br>(8 61 to 13 36)     |
| Costa Rica                                       | 4 14<br>(3 85 to 4 46)             | 2 83<br>(2 59 to 3 09)       | 2 21<br>(1 96 to 2 47)       | 1 92<br>(1 68 to 2 18)       | 1 60<br>(1 38 to 1 85)       | 1 32<br>(1 09 to 1 60)       | 1 16<br>(0 95 to 1 41)       | 0 99<br>(0 80 to 1 20)       | 0 85<br>(0 65 to 1 10)       | 0 63<br>(0 41 to 0 94)       |
| El Salvador                                      | 21 27<br>(18 54 to 24 18)          | 18 79<br>(16 82 to 20 86)    | 15 41<br>(13 85 to 17 06)    | 11 44<br>(10 28 to 12 64)    | 8 20<br>(7 24 to 9 28)       | 6 12<br>(5 24 to 7 15)       | 4 31<br>(3 67 to 5 01)       | 2 77<br>(2 18 to 3 43)       | 1 89<br>(1 47 to 2 39)       | 1 25<br>(0 86 to 1 77)       |
|                                                  |                                    |                              |                              |                              |                              |                              |                              |                              |                              |                              |

Appendix Table 12A. Under-5 death numbers by location, both sexes combined, 1970, 1975, 1980, 1985, 1990, 1995, 2000, 2005, 2010, 2016

| Location                               | 1970                               | 1975                               | 1980                               | 1985                               | 1990                               | 1995                               | 2000                               | 2005                         | 2010                         | 2016                         |
|----------------------------------------|------------------------------------|------------------------------------|------------------------------------|------------------------------------|------------------------------------|------------------------------------|------------------------------------|------------------------------|------------------------------|------------------------------|
| Andean Latin America                   | 162.89<br>(151.63 to 174.35)       | 143.16<br>(135.93 to 150.28)       | 131.41<br>(124.23 to 138.90)       | 114.63<br>(108.94 to 120.74)       | 92.98<br>(88.77 to 97.46)          | 72.00<br>(68.71 to 75.57)          | 52.82<br>(49.52 to 55.93)          | 41.53<br>(38.34 to 44.75)    | 34.25<br>(31.16 to 37.26)    | 28.19<br>(24.29 to 32.41)    |
| Bolivia                                | 42.91<br>(39.35 to 46.60)          | 39.72<br>(37.07 to 42.33)          | 36.27<br>(33.88 to 38.94)          | 32.45<br>(30.22 to 34.86)          | 27.88<br>(26.00 to 29.72)          | 23.54<br>(21.69 to 25.40)          | 19.25<br>(17.19 to 21.66)          | 15.65<br>(13.64 to 17.81)    | 12.49<br>(10.25 to 15.03)    | 9.74<br>(7.35 to 12.63)      |
| Ecuador                                | 93.37<br>(82.77 to 104.31)         | 78.75<br>(72.36 to 84.72)          | 73.32<br>(66.95 to 79.81)          | 63.53<br>(58.60 to 68.58)          | 49.48<br>(46.01 to 53.25)          | 35.20<br>(32.26 to 38.24)          | 22.60<br>(20.67 to 24.50)          | 16.72<br>(14.89 to 18.70)    | 14.10<br>(12.66 to 15.58)    | 12.11<br>(9.61 to 15.23)     |
| Peru                                   | 101.68<br>(88.51 to 115.18)        | 88.82<br>(75.84 to 100.79)         | 79.08<br>(67.36 to 91.95)          | 69.99<br>(60.51 to 80.01)          | 61.83<br>(52.80 to 70.43)          | 52.47<br>(45.01 to 60.31)          | 43.46<br>(35.12 to 53.06)          | 40.89<br>(34.16 to 48.09)    | 37.79<br>(30.71 to 44.82)    | 27.23<br>(19.75 to 37.76)    |
| Caribbean                              | 0.06<br>(0.05 to 0.08)             | 0.05<br>(0.03 to 0.06)             | 0.03<br>(0.02 to 0.04)             | 0.02<br>(0.01 to 0.03)             | 0.02<br>(0.01 to 0.02)             | 0.11<br>(0.01 to 0.03)             | 0.02<br>(0.01 to 0.03)             | 0.08<br>(0.01 to 0.03)       | 0.08<br>(0.01 to 0.02)       | 0.08<br>(0.01 to 0.02)       |
| Antigua and Barbuda                    | 0.23<br>(0.15 to 0.34)             | 0.20<br>(0.14 to 0.29)             | 0.18<br>(0.12 to 0.27)             | 0.16<br>(0.10 to 0.24)             | 0.13<br>(0.08 to 0.22)             | 0.11<br>(0.07 to 0.16)             | 0.06<br>(0.05 to 0.11)             | 0.08<br>(0.06 to 0.11)       | 0.08<br>(0.05 to 0.12)       | 0.08<br>(0.03 to 0.16)       |
| The Bahamas                            | 0.24<br>(0.17 to 0.34)             | 0.17<br>(0.11 to 0.23)             | 0.12<br>(0.08 to 0.17)             | 0.10<br>(0.06 to 0.15)             | 0.07<br>(0.04 to 0.11)             | 0.06<br>(0.03 to 0.10)             | 0.06<br>(0.04 to 0.08)             | 0.06<br>(0.04 to 0.08)       | 0.05<br>(0.03 to 0.08)       | 0.04<br>(0.02 to 0.09)       |
| Barbados                               | 0.54<br>(0.42 to 0.66)             | 0.44<br>(0.36 to 0.54)             | 0.38<br>(0.31 to 0.46)             | 0.30<br>(0.29 to 0.42)             | 0.30<br>(0.24 to 0.36)             | 0.19<br>(0.15 to 0.25)             | 0.21<br>(0.15 to 0.27)             | 0.19<br>(0.13 to 0.26)       | 0.19<br>(0.10 to 0.23)       | 0.15<br>(0.07 to 0.29)       |
| Belize                                 | 0.03<br>(0.02 to 0.03)             | 0.02<br>(0.01 to 0.02)             | 0.01<br>(0.01 to 0.02)             | 0.01<br>(0.01 to 0.01)             | 0.01<br>(0.01 to 0.01)             | 0.01<br>(0.01 to 0.01)             | <0.01<br>(-0.01 to 0.01)           | <0.01<br>(-0.01 to 0.01)     | <0.01<br>(-0.01 to 0.01)     | <0.01<br>(-0.01 to 0.01)     |
| Bermuda                                | 10.60<br>(10.48 to 10.73)          | 5.95<br>(5.86 to 6.04)             | 3.25<br>(3.25 to 3.42)             | 3.25<br>(3.13 to 3.36)             | 2.57<br>(2.49 to 2.64)             | 1.66<br>(1.62 to 1.71)             | 1.28<br>(1.25 to 1.31)             | 0.87<br>(0.85 to 0.90)       | 0.78<br>(0.75 to 0.80)       | 0.60<br>(0.48 to 0.74)       |
| Cuba                                   | 0.17<br>(0.12 to 0.22)             | 0.08<br>(0.05 to 0.11)             | 0.04<br>(0.03 to 0.06)             | 0.03<br>(0.02 to 0.05)             | 0.03<br>(0.02 to 0.04)             | 0.03<br>(0.02 to 0.04)             | 0.02<br>(0.02 to 0.03)             | 0.02<br>(0.02 to 0.03)       | 0.02<br>(0.02 to 0.04)       | 0.03<br>(0.02 to 0.04)       |
| Dominica                               | 20.53<br>(17.61 to 23.50)          | 19.97<br>(17.35 to 22.65)          | 17.40<br>(15.34 to 19.61)          | 13.55<br>(11.83 to 15.37)          | 11.90<br>(9.88 to 13.96)           | 10.02<br>(8.04 to 12.01)           | 7.98<br>(6.75 to 9.33)             | 7.79<br>(6.22 to 9.64)       | 6.66<br>(5.16 to 8.50)       | 5.11<br>(3.63 to 6.89)       |
| Dominican Republic                     | 0.16<br>(0.09 to 0.24)             | 0.13<br>(0.07 to 0.20)             | 0.09<br>(0.05 to 0.17)             | 0.09<br>(0.04 to 0.16)             | 0.09<br>(0.03 to 0.09)             | 0.04<br>(0.02 to 0.06)             | 0.04<br>(0.02 to 0.05)             | 0.03<br>(0.02 to 0.04)       | 0.03<br>(0.02 to 0.04)       | 0.03<br>(0.01 to 0.05)       |
| Grenada                                | 1.96<br>(1.71 to 2.23)             | 1.83<br>(1.63 to 2.05)             | 1.58<br>(1.40 to 1.79)             | 1.28<br>(1.07 to 1.51)             | 1.17<br>(0.93 to 1.43)             | 0.98<br>(0.78 to 1.17)             | 0.76<br>(0.62 to 0.92)             | 0.61<br>(0.50 to 0.73)       | 0.45<br>(0.36 to 0.56)       | 0.34<br>(0.25 to 0.45)       |
| Guayana                                | 54.14<br>(41.55 to 67.08)          | 49.80<br>(37.90 to 61.20)          | 47.39<br>(36.20 to 59.62)          | 44.03<br>(34.78 to 53.51)          | 39.28<br>(31.21 to 47.11)          | 33.87<br>(27.24 to 41.27)          | 28.40<br>(20.17 to 37.63)          | 27.20<br>(20.75 to 34.14)    | 21.93<br>(16.24 to 27.64)    | 17.95<br>(11.07 to 27.81)    |
| Haiti                                  | 4.18<br>(3.42 to 4.88)             | 3.18<br>(2.60 to 3.88)             | 2.36<br>(1.98 to 3.66)             | 2.26<br>(1.72 to 3.14)             | 2.15<br>(1.46 to 3.15)             | 1.59<br>(1.19 to 2.75)             | 1.31<br>(1.04 to 2.36)             | 1.26<br>(0.78 to 2.09)       | 1.26<br>(0.63 to 2.28)       | 1.13<br>(0.61 to 1.88)       |
| Jamaica                                | 2.16<br>(2.12 to 2.21)             | 1.75<br>(1.71 to 1.79)             | 1.46<br>(1.43 to 1.50)             | 1.12<br>(1.07 to 1.17)             | 0.98<br>(0.96 to 1.01)             | 0.85<br>(0.80 to 0.90)             | 0.64<br>(0.59 to 0.70)             | 0.48<br>(0.43 to 0.54)       | 0.38<br>(0.34 to 0.43)       | 0.28<br>(0.22 to 0.34)       |
| Puerto Rico                            | 0.30<br>(0.17 to 0.50)             | 0.20<br>(0.13 to 0.32)             | 0.14<br>(0.09 to 0.21)             | 0.11<br>(0.05 to 0.18)             | 0.08<br>(0.05 to 0.14)             | 0.07<br>(0.04 to 0.11)             | 0.05<br>(0.03 to 0.08)             | 0.05<br>(0.03 to 0.08)       | 0.04<br>(0.03 to 0.07)       | 0.03<br>(0.02 to 0.06)       |
| Saint Lucia                            | 0.33<br>(0.22 to 0.47)             | 0.24<br>(0.16 to 0.34)             | 0.16<br>(0.11 to 0.24)             | 0.11<br>(0.07 to 0.16)             | 0.08<br>(0.05 to 0.13)             | 0.07<br>(0.04 to 0.10)             | 0.05<br>(0.03 to 0.07)             | 0.04<br>(0.03 to 0.06)       | 0.04<br>(0.03 to 0.05)       | 0.03<br>(0.02 to 0.05)       |
| Saint Vincent and the Grenadines       | 0.92<br>(0.74 to 1.15)             | 0.73<br>(0.61 to 0.88)             | 0.65<br>(0.56 to 0.77)             | 0.64<br>(0.53 to 0.75)             | 0.59<br>(0.47 to 0.74)             | 0.58<br>(0.44 to 0.75)             | 0.55<br>(0.40 to 0.71)             | 0.49<br>(0.32 to 0.66)       | 0.41<br>(0.26 to 0.60)       | 0.33<br>(0.19 to 0.54)       |
| Suriname                               | 1.50<br>(1.30 to 1.70)             | 1.34<br>(1.15 to 1.56)             | 1.25<br>(1.04 to 1.50)             | 1.06<br>(0.86 to 1.29)             | 0.70<br>(0.55 to 0.87)             | 0.57<br>(0.41 to 0.76)             | 0.53<br>(0.38 to 0.71)             | 0.46<br>(0.33 to 0.62)       | 0.38<br>(0.20 to 0.66)       | 0.28<br>(0.10 to 0.65)       |
| Trinidad and Tobago                    | 0.08<br>(0.07 to 0.09)             | 0.07<br>(0.06 to 0.08)             | 0.06<br>(0.06 to 0.07)             | 0.05<br>(0.04 to 0.05)             | 0.04<br>(0.04 to 0.05)             | 0.03<br>(0.03 to 0.04)             | 0.02<br>(0.02 to 0.02)             | 0.02<br>(0.02 to 0.02)       | 0.01<br>(0.01 to 0.02)       | 0.01<br>(0.01 to 0.01)       |
| Virgin Islands, U.S.                   | 387.40<br>(370.54 to 405.48)       | 360.23<br>(345.43 to 374.83)       | 315.13<br>(303.32 to 327.17)       | 288.80<br>(250.15 to 266.66)       | 200.25<br>(193.69 to 206.68)       | 152.70<br>(147.62 to 157.82)       | 114.54<br>(109.77 to 119.57)       | 89.16<br>(84.74 to 93.59)    | 70.89<br>(66.06 to 75.87)    | 54.08<br>(50.14 to 57.89)    |
| Tropical Latin America                 | 389.56<br>(364.76 to 400.08)       | 354.61<br>(339.89 to 369.19)       | 253.62<br>(298.01 to 321.75)       | 253.62<br>(245.07 to 261.63)       | 195.65<br>(189.13 to 202.07)       | 148.45<br>(143.43 to 153.59)       | 110.33<br>(105.67 to 115.43)       | 85.44<br>(81.01 to 89.88)    | 67.81<br>(63.16 to 72.69)    | 51.69<br>(47.75 to 55.42)    |
| Brazil                                 | 5.85<br>(5.18 to 6.59)             | 5.61<br>(5.01 to 6.23)             | 5.23<br>(4.52 to 5.91)             | 5.18<br>(4.66 to 5.72)             | 4.60<br>(4.15 to 5.09)             | 4.25<br>(3.66 to 4.92)             | 4.21<br>(3.61 to 4.91)             | 3.72<br>(3.09 to 4.44)       | 3.08<br>(2.33 to 4.01)       | 2.39<br>(1.76 to 3.20)       |
| Paraguay                               | 4.680 63<br>(4.513 53 to 4.853 10) | 3.585 26<br>(3.466 93 to 3.709 45) | 2.822 90<br>(2.724 44 to 2.917 13) | 2.435 14<br>(2.357 40 to 2.509 11) | 2.047 19<br>(1.985 54 to 2.113 07) | 1.595 70<br>(1.531 67 to 1.664 88) | 1.190 57<br>(1.138 10 to 1.249 71) | 834.76<br>(801.60 to 872.18) | 628.63<br>(600.11 to 657.86) | 422.43<br>(395.54 to 450.63) |
| Southeast Asia, East Asia, and Oceania | 3,228.78<br>(3,076.56 to 3,393.65) | 2,293.55<br>(2,192.21 to 2,399.57) | 1,717.13<br>(1,638.80 to 1,797.43) | 1,467.79<br>(1,401.89 to 1,533.43) | 1,218.52<br>(1,167.87 to 1,275.60) | 896.63<br>(845.74 to 954.87)       | 605.37<br>(562.94 to 653.52)       | 351.00<br>(335.82 to 366.91) | 243.15<br>(230.82 to 256.31) | 154.53<br>(140.90 to 170.05) |
| East Asia                              | 3,183.91<br>(3,035.01 to 3,344.13) | 2,263.60<br>(2,164.70 to 2,368.33) | 1,694.78<br>(1,618.63 to 1,777.04) | 1,446.29<br>(1,381.46 to 1,510.94) | 1,198.00<br>(1,146.90 to 1,255.53) | 825.37<br>(794.59 to 858.67)       | 534.34<br>(514.66 to 555.90)       | 327.06<br>(314.22 to 339.79) | 223.01<br>(213.60 to 233.18) | 137.53<br>(125.38 to 150.62) |
| China                                  | 34.30<br>(22.94 to 48.28)          | 22.76<br>(14.79 to 31.96)          | 16.11<br>(10.40 to 23.36)          | 17.71<br>(11.60 to 25.61)          | 17.69<br>(11.18 to 26.29)          | 68.36<br>(29.58 to 111.61)         | 68.52<br>(32.65 to 108.18)         | 22.47<br>(14.92 to 32.82)    | 19.13<br>(12.47 to 28.20)    | 16.08<br>(10.40 to 24.93)    |
| North Korea                            | 10.57<br>(10.39 to 10.74)          | 7.19<br>(7.03 to 7.34)             | 6.25<br>(6.10 to 6.39)             | 3.79<br>(3.68 to 3.90)             | 2.91<br>(2.75 to 2.92)             | 2.91<br>(2.82 to 3.00)             | 2.51<br>(2.43 to 2.58)             | 1.48<br>(1.43 to 1.54)       | 1.01<br>(0.96 to 1.06)       | 0.92<br>(0.80 to 1.08)       |
| Taiwan (Province of China)             | 1,434.28<br>(1,368.14 to 1,507.80) | 1,273.98<br>(1,212.37 to 1,341.93) | 1,088.97<br>(1,037.31 to 1,139.35) | 950.63<br>(913.40 to 990.37)       | 811.75<br>(774.83 to 853.12)       | 682.08<br>(645.10 to 728.72)       | 466.90<br>(536.47 to 605.54)       | 369.88<br>(437.56 to 501.46) | 369.88<br>(345.80 to 397.36) | 254.38<br>(231.69 to 277.91) |
| Southeast Asia                         | 50.45<br>(41.52 to 60.33)          | 81.66<br>(51.43 to 113.35)         | 40.81<br>(35.11 to 47.06)          | 36.57<br>(31.63 to 41.75)          | 33.63<br>(30.06 to 37.27)          | 34.39<br>(31.12 to 38.16)          | 30.55<br>(27.63 to 33.69)          | 23.97<br>(21.29 to 26.92)    | 17.83<br>(15.23 to 20.53)    | 12.45<br>(9.87 to 15.32)     |
| Cambodia                               | 751.42<br>(728.26 to 774.03)       | 637.80<br>(611.66 to 663.67)       | 556.13<br>(535.14 to 576.52)       | 472.82<br>(457.44 to 489.61)       | 389.09<br>(377.24 to 401.64)       | 321.50<br>(312.52 to 330.86)       | 265.40<br>(256.90 to 273.94)       | 215.27<br>(207.04 to 223.78) | 172.48<br>(163.74 to 182.31) | 112.70<br>(102.57 to 123.67) |
| Indonesia                              | 36.85<br>(22.46 to 55.60)          | 36.28<br>(23.62 to 51.26)          | 31.55<br>(22.45 to 41.44)          | 29.23<br>(21.81 to 36.24)          | 30.02<br>(23.31 to 37.16)          | 30.06<br>(23.02 to 37.70)          | 26.33<br>(20.73 to 32.31)          | 21.70<br>(16.48 to 27.59)    | 18.16<br>(11.66 to 26.60)    | 14.87<br>(7.49 to 25.62)     |
| Laos                                   | 19.67<br>(19.42 to 19.94)          | 16.24<br>(15.53 to 16.90)          | 12.76<br>(11.80 to 13.73)          | 10.79<br>(10.60 to 10.99)          | 8.51<br>(8.34 to 8.69)             | 7.09<br>(6.94 to 7.24)             | 5.00<br>(4.88 to 5.13)             | 3.94<br>(3.82 to 4.05)       | 4.15<br>(3.88 to 4.41)       | 3.06<br>(2.58 to 3.58)       |
| Malaysia                               | 1.19<br>(1.03 to 1.36)             | 1.01<br>(0.88 to 1.15)             | 0.93<br>(0.81 to 1.06)             | 0.74<br>(0.64 to 0.84)             | 0.49<br>(0.43 to 0.56)             | 0.29<br>(0.25 to 0.33)             | 0.16<br>(0.14 to 0.17)             | 0.10<br>(0.10 to 0.11)       | 0.08<br>(0.07 to 0.09)       | 0.04<br>(0.04 to 0.05)       |
| Maldives                               | 1.91<br>(1.87 to 1.95)             | 1.40<br>(1.37 to 1.43)             | 0.96<br>(0.94 to 0.99)             | 0.54<br>(0.52 to 0.56)             | 0.50<br>(0.48 to 0.52)             | 0.44<br>(0.43 to 0.46)             | 0.36<br>(0.34 to 0.37)             | 0.28<br>(0.27 to 0.30)       | 0.22<br>(0.21 to 0.23)       | 0.19<br>(0.15 to 0.23)       |
| Mauritius                              | 154.73<br>(106.39 to 211.51)       | 138.39<br>(99.13 to 185.24)        | 127.40<br>(91.31 to 166.31)        | 120.82<br>(91.72 to 153.29)        | 114.15<br>(83.77 to 150.14)        | 104.11<br>(73.47 to 146.59)        | 91.70<br>(63.18 to 127.52)         | 72.83<br>(47.93 to 105.00)   | 46.65<br>(30.23 to 67.75)    | 26.23<br>(15.54 to 44.11)    |
| Myanmar                                | 127.47<br>(118.85 to 136.39)       | 127.24<br>(117.26 to 137.54)       | 128.95<br>(118.39 to 139.81)       | 121.81<br>(112.78 to 131.05)       | 107.13<br>(98.91 to 116.35)        | 92.66<br>(85.80 to 99.67)          | 83.51<br>(76.56 to 90.92)          | 77.55<br>(70.12 to 85.67)    | 69.63<br>(60.41 to 80.07)    | 58.02<br>(47.89 to 69.70)    |
| Philippines                            | 25.50<br>(25.19 to 25.79)          | 25.81<br>(25.23 to 26.40)          | 18.74<br>(18.47 to 19.01)          | 12.74<br>(12.50 to 13.00)          | 11.96<br>(11.45 to 12.51)          | 7.37<br>(7.21 to 7.55)             | 5.84<br>(5.66 to 6.02)             | 6.47<br>(6.31 to 6.63)       | 4.81<br>(4.34 to 5.25)       | 1.92<br>(1.24 to 2.87)       |
| Sri Lanka                              | 0.14<br>(0.13 to 0.15)             | 0.09<br>(0.09 to 0.10)             | 0.06<br>(0.05 to 0.06)             | 0.04<br>(0.04 to 0.05)             | 0.03<br>(0.03 to 0.03)             | 0.02<br>(0.02 to 0.03)             | 0.02<br>(0.02 to 0.02)             | 0.02<br>(0.02 to 0.02)       | 0.02<br>(0.02 to 0.03)       | 0.02<br>(0.01 to 0.02)       |
| Seychelles                             | 123.10<br>(107.98 to 138.25)       | 99.86<br>(86.94 to 113.76)         | 72.58<br>(58.27 to 87.54)          | 48.76<br>(39.89 to 58.94)          | 34.63<br>(27.18 to 42.82)          | 24.15<br>(18.19 to 31.13)          | 16.43<br>(12.16 to 21.43)          | 10.46<br>(8.02 to 13.69)     | 6.59<br>(5.28 to 8.23)       | 3.69<br>(2.63 to 4.95)       |
| Thailand                               | 6.71<br>(4.74 to 9.09)             | 6.79<br>(5.02 to 8.58)             | 6.02<br>(4.55 to 7.63)             | 4.58<br>(3.43 to 5.91)             | 3.88<br>(3.00 to 4.84)             | 3.17<br>(2.47 to 3.87)             | 2.02<br>(1.51 to 2.63)             | 1.72<br>(1.20 to 2.32)       | 1.69<br>(1.11 to 2.47)       | 1.18<br>(0.65 to 1.90)       |
| Timor-Leste                            | 132.87<br>(106.06 to 162.52)       | 99.96<br>(84.97 to 117.11)         | 90.87<br>(77.80 to 105.13)         | 90.05<br>(75.77 to 105.54)         | 76.71<br>(63.14 to 91.62)          | 56.03<br>(46.73 to 66.47)          | 31.96<br>(35.31 to 45.59)          | 27.14<br>(26.70 to 38.07)    | 19.72<br>(21.46 to 34.20)    | 17.92<br>(14.91 to 26.17)    |
| Vietnam                                | 17.57<br>(14.54 to 20.88)          | 17.73<br>(14.79 to 20.91)          | 16.79<br>(14.20 to 19.60)          | 16.73<br>(14.07 to 19.62)          | 16.92<br>(13.92 to 20.23)          | 16.99<br>(13.42 to 21.15)          | 16.91<br>(12.35 to 22.51)          | 16.85<br>(11.05 to 24.24)    | 15.60<br>(9.65 to 23.77)     | 13.53<br>(8.26 to 21.60)     |
| Oceania                                | 0.04<br>(0.03 to 0.04)             | 0.03<br>(0.03                      |                                    |                                    |                                    |                                    |                                    |                              |                              |                              |

Appendix Table 12A. Under-5 death numbers by location, both sexes combined, 1970, 1975, 1980, 1985, 1990, 1995, 2000, 2005, 2010, 2016

| Location                     | 1970                               | 1975                               | 1980                               | 1985                               | 1990                               | 1995                               | 2000                               | 2005                               | 2010                               | 2016                               |
|------------------------------|------------------------------------|------------------------------------|------------------------------------|------------------------------------|------------------------------------|------------------------------------|------------------------------------|------------------------------------|------------------------------------|------------------------------------|
| Marshall Islands             | 0.07<br>(0.04 to 0.12)             | 0.07<br>(0.04 to 0.12)             | 0.06<br>(0.04 to 0.10)             | 0.07<br>(0.05 to 0.10)             | 0.07<br>(0.05 to 0.09)             | 0.06<br>(0.04 to 0.09)             | 0.08<br>(0.05 to 0.11)             | 0.06<br>(0.04 to 0.09)             | 0.06<br>(0.03 to 0.10)             | 0.05<br>(0.02 to 0.08)             |
| Northern Mariana Islands     | 0.01<br>(<0.01 to 0.01)            | 0.01<br>(<0.01 to 0.01)            | 0.01<br>(<0.01 to 0.01)            | 0.01<br>(<0.01 to 0.02)            | 0.01<br>(0.01 to 0.02)             | 0.01<br>(0.01 to 0.02)             | 0.01<br>(0.01 to 0.02)             | 0.01<br>(0.01 to 0.01)             | 0.01<br>(<0.01 to 0.01)            | 0.01<br>(<0.01 to 0.01)            |
| Papua New Guinea             | 12.94<br>(10.17 to 15.97)          | 13.45<br>(10.78 to 16.41)          | 13.15<br>(10.81 to 15.69)          | 13.34<br>(10.93 to 16.08)          | 13.82<br>(11.09 to 16.93)          | 14.19<br>(10.88 to 18.20)          | 14.27<br>(10.03 to 19.67)          | 14.35<br>(8.79 to 21.51)           | 13.43<br>(7.64 to 21.30)           | 11.59<br>(6.53 to 19.40)           |
| Samoa                        | 0.33<br>(0.25 to 0.42)             | 0.26<br>(0.18 to 0.37)             | 0.18<br>(0.11 to 0.31)             | 0.16<br>(0.09 to 0.29)             | 0.13<br>(0.06 to 0.24)             | 0.10<br>(0.05 to 0.20)             | 0.09<br>(0.04 to 0.17)             | 0.08<br>(0.04 to 0.15)             | 0.07<br>(0.03 to 0.13)             | 0.06<br>(0.03 to 0.11)             |
| Solomon Islands              | 0.76<br>(0.55 to 0.98)             | 0.71<br>(0.48 to 1.01)             | 0.55<br>(0.36 to 0.83)             | 0.50<br>(0.34 to 0.71)             | 0.50<br>(0.34 to 0.70)             | 0.50<br>(0.36 to 0.69)             | 0.53<br>(0.38 to 0.73)             | 0.58<br>(0.39 to 0.80)             | 0.54<br>(0.35 to 0.81)             | 0.43<br>(0.27 to 0.66)             |
| Tonga                        | 0.12<br>(0.08 to 0.17)             | 0.11<br>(0.07 to 0.15)             | 0.11<br>(0.07 to 0.15)             | 0.09<br>(0.06 to 0.14)             | 0.09<br>(0.05 to 0.14)             | 0.08<br>(0.04 to 0.13)             | 0.07<br>(0.04 to 0.12)             | 0.07<br>(0.04 to 0.12)             | 0.07<br>(0.04 to 0.11)             | 0.05<br>(0.03 to 0.09)             |
| Vanuatu                      | 0.37<br>(0.25 to 0.52)             | 0.33<br>(0.22 to 0.48)             | 0.29<br>(0.19 to 0.42)             | 0.27<br>(0.19 to 0.36)             | 0.26<br>(0.20 to 0.33)             | 0.26<br>(0.19 to 0.33)             | 0.28<br>(0.21 to 0.35)             | 0.31<br>(0.23 to 0.40)             | 0.30<br>(0.21 to 0.41)             | 0.27<br>(0.17 to 0.41)             |
| North Africa and Middle East | 1,612.18<br>(1,500.92 to 1,736.49) | 1,405.97<br>(1,304.24 to 1,495.41) | 1,225.13<br>(1,139.14 to 1,313.87) | 1,055.52<br>(981.44 to 1,128.22)   | 805.96<br>(756.02 to 857.73)       | 672.74<br>(623.47 to 728.99)       | 569.22<br>(515.91 to 621.10)       | 494.48<br>(444.82 to 550.52)       | 441.29<br>(389.87 to 496.34)       | 357.07<br>(298.18 to 421.63)       |
| North Africa and Middle East | 1,612.18<br>(1,500.92 to 1,736.49) | 1,405.97<br>(1,304.24 to 1,495.41) | 1,225.13<br>(1,139.14 to 1,313.87) | 1,055.52<br>(981.44 to 1,128.22)   | 805.96<br>(756.02 to 857.73)       | 672.74<br>(623.47 to 728.99)       | 569.22<br>(515.91 to 621.10)       | 494.48<br>(444.82 to 550.52)       | 441.29<br>(389.87 to 496.34)       | 357.07<br>(298.18 to 421.63)       |
| Afghanistan                  | 126.11<br>(87.97 to 164.00)        | 133.30<br>(96.15 to 173.72)        | 136.13<br>(102.60 to 172.45)       | 110.88<br>(83.62 to 138.31)        | 79.71<br>(59.95 to 98.66)          | 95.03<br>(69.94 to 118.24)         | 100.10<br>(76.88 to 122.45)        | 98.23<br>(76.04 to 120.75)         | 81.04<br>(59.64 to 103.31)         | 74.79<br>(49.40 to 103.93)         |
| Algeria                      | 103.23<br>(85.23 to 121.58)        | 91.06<br>(74.32 to 107.59)         | 74.05<br>(60.71 to 87.25)          | 54.52<br>(43.50 to 65.63)          | 41.37<br>(32.87 to 50.52)          | 37.29<br>(28.21 to 48.30)          | 34.01<br>(25.91 to 43.14)          | 31.01<br>(22.85 to 36.33)          | 23.98<br>(17.16 to 31.90)          | 16.03<br>(10.49 to 23.80)          |
| Bahrain                      | 0.65<br>(0.47 to 0.84)             | 0.46<br>(0.36 to 0.56)             | 0.31<br>(0.28 to 0.34)             | 0.28<br>(0.26 to 0.30)             | 0.31<br>(0.29 to 0.33)             | 0.24<br>(0.22 to 0.26)             | 0.17<br>(0.15 to 0.18)             | 0.16<br>(0.14 to 0.17)             | 0.15<br>(0.13 to 0.16)             | 0.13<br>(0.10 to 0.17)             |
| Egypt                        | 351.26<br>(315.15 to 389.36)       | 317.26<br>(284.04 to 352.38)       | 258.52<br>(225.82 to 291.52)       | 194.87<br>(174.08 to 217.67)       | 142.63<br>(128.26 to 158.14)       | 101.06<br>(90.08 to 113.01)        | 75.77<br>(65.61 to 86.72)          | 66.39<br>(56.29 to 77.36)          | 60.68<br>(50.04 to 73.34)          | 41.67<br>(28.52 to 60.81)          |
| Iran                         | 320.82<br>(244.46 to 402.30)       | 208.43<br>(160.75 to 262.54)       | 182.46<br>(137.96 to 230.52)       | 164.11<br>(129.32 to 200.56)       | 133.04<br>(107.65 to 161.32)       | 73.63<br>(54.78 to 96.22)          | 52.06<br>(34.10 to 74.91)          | 44.45<br>(21.39 to 78.73)          | 37.57<br>(15.43 to 70.78)          | 27.87<br>(11.24 to 59.62)          |
| Iraq                         | 54.79<br>(29.48 to 72.93)          | 51.12<br>(27.17 to 66.99)          | 45.58<br>(22.97 to 60.24)          | 44.37<br>(22.49 to 59.83)          | 34.62<br>(14.56 to 50.06)          | 37.79<br>(16.00 to 57.74)          | 35.53<br>(18.68 to 52.15)          | 39.18<br>(26.79 to 52.40)          | 45.68<br>(26.29 to 62.83)          | 46.39<br>(22.89 to 69.72)          |
| Jordan                       | 9.05<br>(8.13 to 9.98)             | 8.04<br>(7.40 to 8.70)             | 6.38<br>(4.96 to 8.52)             | 4.32<br>(3.83 to 4.84)             | 4.27<br>(3.31 to 4.18)             | 4.27<br>(3.70 to 4.91)             | 3.85<br>(3.39 to 4.31)             | 3.59<br>(3.19 to 4.03)             | 3.58<br>(3.08 to 4.11)             | 3.38<br>(2.69 to 4.28)             |
| Kuwait                       | 1.76<br>(1.68 to 1.84)             | 2.04<br>(1.96 to 2.12)             | 1.66<br>(1.58 to 1.74)             | 1.16<br>(1.11 to 1.22)             | 0.68<br>(0.58 to 0.78)             | 0.57<br>(0.53 to 0.60)             | 0.54<br>(0.50 to 0.57)             | 0.53<br>(0.50 to 0.57)             | 0.62<br>(0.58 to 0.67)             | 0.52<br>(0.46 to 0.73)             |
| Lebanon                      | 6.19<br>(4.92 to 7.81)             | 6.55<br>(4.99 to 8.19)             | 6.54<br>(4.31 to 8.93)             | 3.56<br>(2.68 to 4.56)             | 2.41<br>(1.96 to 2.96)             | 1.64<br>(1.24 to 2.12)             | 1.06<br>(0.77 to 1.40)             | 0.74<br>(0.49 to 1.07)             | 0.62<br>(0.40 to 0.90)             | 0.64<br>(0.44 to 0.89)             |
| Libya                        | 8.77<br>(7.17 to 10.39)            | 7.09<br>(6.00 to 8.21)             | 5.62<br>(4.68 to 6.69)             | 4.83<br>(3.77 to 5.98)             | 4.42<br>(3.42 to 5.52)             | 3.95<br>(3.14 to 4.82)             | 3.60<br>(2.70 to 4.58)             | 2.94<br>(2.08 to 3.91)             | 1.97<br>(1.34 to 2.71)             | 1.15<br>(0.78 to 1.62)             |
| Morocco                      | 103.12<br>(95.84 to 111.05)        | 91.87<br>(85.65 to 97.81)          | 79.55<br>(74.16 to 85.40)          | 66.55<br>(61.90 to 71.15)          | 52.90<br>(48.64 to 57.15)          | 39.92<br>(35.70 to 44.19)          | 29.12<br>(25.19 to 33.24)          | 21.16<br>(17.46 to 25.51)          | 15.16<br>(11.81 to 19.31)          | 9.72<br>(7.18 to 12.90)            |
| Palestine                    | 4.56<br>(2.63 to 6.45)             | 3.44<br>(2.23 to 6.11)             | 3.83<br>(1.63 to 5.45)             | 3.07<br>(1.23 to 4.49)             | 2.97<br>(1.42 to 4.90)             | 3.09<br>(1.45 to 4.22)             | 3.15<br>(1.40 to 4.69)             | 3.98<br>(1.67 to 4.72)             | 3.85<br>(2.48 to 5.45)             | 3.85<br>(1.87 to 6.03)             |
| Oman                         | 10.28<br>(8.94 to 11.71)           | 8.94<br>(7.49 to 10.36)            | 7.17<br>(5.78 to 8.59)             | 5.16<br>(4.18 to 6.27)             | 3.49<br>(2.79 to 4.35)             | 2.26<br>(1.80 to 2.87)             | 1.44<br>(1.18 to 1.75)             | 0.71<br>(0.61 to 0.82)             | 0.75<br>(0.63 to 0.87)             | 0.73<br>(0.53 to 0.97)             |
| Qatar                        | 0.28<br>(0.19 to 0.39)             | 0.30<br>(0.23 to 0.39)             | 0.25<br>(0.17 to 0.35)             | 0.25<br>(0.19 to 0.33)             | 0.21<br>(0.17 to 0.33)             | 0.19<br>(0.15 to 0.28)             | 0.18<br>(0.12 to 0.24)             | 0.19<br>(0.13 to 0.26)             | 0.24<br>(0.16 to 0.33)             | 0.24<br>(0.16 to 0.36)             |
| Saudi Arabia                 | 42.04<br>(36.89 to 47.44)          | 37.83<br>(34.37 to 41.60)          | 34.27<br>(30.39 to 38.38)          | 33.89<br>(29.47 to 39.11)          | 29.53<br>(25.36 to 34.40)          | 21.70<br>(18.11 to 26.39)          | 16.29<br>(13.49 to 20.11)          | 11.11<br>(9.25 to 13.61)           | 6.88<br>(5.68 to 8.38)             | 3.10<br>(2.47 to 3.92)             |
| Sudan                        | 73.27<br>(59.93 to 87.31)          | 79.40<br>(61.83 to 95.61)          | 83.56<br>(66.24 to 101.50)         | 125.85<br>(93.14 to 158.75)        | 79.79<br>(68.35 to 92.79)          | 84.00<br>(70.05 to 98.99)          | 83.00<br>(67.41 to 100.69)         | 72.44<br>(54.03 to 90.88)          | 69.65<br>(50.73 to 91.23)          | 59.99<br>(30.70 to 93.08)          |
| Syria                        | 27.94<br>(25.10 to 30.71)          | 25.42<br>(22.13 to 28.53)          | 22.45<br>(19.25 to 25.66)          | 20.57<br>(16.92 to 24.72)          | 18.84<br>(15.24 to 22.40)          | 17.78<br>(11.59 to 16.00)          | 9.09<br>(7.72 to 10.43)            | 7.81<br>(6.40 to 8.96)             | 8.87<br>(6.39 to 9.44)             | 8.87<br>(4.45 to 13.37)            |
| Tunisia                      | 28.37<br>(25.85 to 30.98)          | 22.77<br>(21.20 to 24.44)          | 18.50<br>(17.04 to 20.03)          | 14.45<br>(12.82 to 16.23)          | 10.59<br>(9.49 to 11.72)           | 7.00<br>(6.18 to 7.89)             | 3.51<br>(3.90 to 5.14)             | 3.11<br>(3.01 to 4.07)             | 1.96<br>(2.54 to 3.72)             | 1.96<br>(1.45 to 2.55)             |
| Turkey                       | 243.01<br>(206.87 to 278.79)       | 227.23<br>(189.85 to 267.37)       | 186.72<br>(150.06 to 227.83)       | 134.76<br>(106.21 to 164.36)       | 95.06<br>(76.78 to 115.63)         | 74.09<br>(61.23 to 88.10)          | 52.89<br>(43.78 to 63.14)          | 36.74<br>(29.85 to 45.09)          | 28.19<br>(20.97 to 37.53)          | 18.90<br>(13.02 to 26.76)          |
| United Arab Emirates         | 1.20<br>(0.82 to 1.67)             | 1.47<br>(0.97 to 2.21)             | 1.92<br>(1.22 to 2.82)             | 1.72<br>(0.96 to 2.82)             | 1.26<br>(0.67 to 2.10)             | 1.04<br>(0.53 to 1.87)             | 0.79<br>(0.42 to 1.35)             | 0.64<br>(0.51 to 0.81)             | 1.08<br>(0.61 to 1.74)             | 0.90<br>(0.47 to 1.60)             |
| Yemen                        | 94.82<br>(45.89 to 122.20)         | 80.57<br>(39.53 to 102.96)         | 69.95<br>(35.92 to 88.74)          | 65.74<br>(36.38 to 82.52)          | 67.46<br>(47.64 to 81.62)          | 69.24<br>(42.26 to 89.86)          | 61.82<br>(33.04 to 84.32)          | 51.25<br>(28.19 to 72.09)          | 48.20<br>(26.90 to 68.84)          | 40.98<br>(18.76 to 65.89)          |
| South Asia                   | 5,366.38<br>(5,209.66 to 5,534.73) | 5,067.42<br>(4,928.83 to 5,197.21) | 4,794.04<br>(4,650.25 to 4,937.27) | 4,437.44<br>(4,299.02 to 4,575.73) | 3,915.49<br>(3,792.26 to 4,032.64) | 3,380.94<br>(3,284.53 to 3,479.37) | 2,892.66<br>(2,826.07 to 2,960.31) | 2,472.16<br>(2,408.66 to 2,538.15) | 1,960.35<br>(1,887.41 to 2,033.09) | 1,240.45<br>(1,164.16 to 1,319.65) |
| South Asia                   | 5,366.38<br>(5,209.66 to 5,534.73) | 5,067.42<br>(4,928.83 to 5,197.21) | 4,794.04<br>(4,650.25 to 4,937.27) | 4,437.44<br>(4,299.02 to 4,575.73) | 3,915.49<br>(3,792.26 to 4,032.64) | 3,380.94<br>(3,284.53 to 3,479.37) | 2,892.66<br>(2,826.07 to 2,960.31) | 2,472.16<br>(2,408.66 to 2,538.15) | 1,960.35<br>(1,887.41 to 2,033.09) | 1,240.45<br>(1,164.16 to 1,319.65) |
| Bangladesh                   | 631.13<br>(580.00 to 683.80)       | 552.88<br>(513.72 to 593.17)       | 533.92<br>(500.32 to 570.03)       | 521.72<br>(489.36 to 554.57)       | 462.90<br>(437.05 to 487.89)       | 361.54<br>(339.40 to 384.53)       | 278.32<br>(258.98 to 298.02)       | 221.16<br>(204.62 to 239.51)       | 161.53<br>(146.65 to 178.16)       | 96.48<br>(83.39 to 111.49)         |
| Bhutan                       | 3.53<br>(2.98 to 4.09)             | 3.55<br>(3.05 to 4.11)             | 3.44<br>(2.91 to 4.00)             | 3.06<br>(2.56 to 3.61)             | 2.70<br>(2.32 to 3.08)             | 2.04<br>(1.75 to 2.31)             | 1.68<br>(1.43 to 1.98)             | 1.30<br>(1.10 to 1.54)             | 0.89<br>(0.72 to 1.09)             | 0.51<br>(0.40 to 0.64)             |
| India                        | 4,164.68<br>(4,029.85 to 4,316.67) | 3,939.89<br>(3,818.38 to 4,059.02) | 3,662.56<br>(3,530.39 to 3,792.57) | 3,294.63<br>(3,166.00 to 3,418.50) | 2,880.69<br>(2,780.09 to 2,982.31) | 2,523.01<br>(2,444.22 to 2,604.31) | 2,191.29<br>(2,141.40 to 2,246.55) | 1,862.70<br>(1,811.61 to 1,916.17) | 1,425.38<br>(1,372.17 to 1,477.86) | 865.58<br>(817.51 to 919.13)       |
| Nepal                        | 120.83<br>(91.07 to 148.93)        | 121.83<br>(92.56 to 151.32)        | 119.47<br>(89.92 to 147.46)        | 110.90<br>(85.95 to 134.55)        | 97.84<br>(76.31 to 120.09)         | 78.84<br>(63.81 to 94.28)          | 62.77<br>(50.01 to 76.22)          | 45.21<br>(35.45 to 55.30)          | 34.63<br>(27.77 to 41.99)          | 24.30<br>(17.91 to 31.92)          |
| Pakistan                     | 446.23<br>(393.91 to 494.09)       | 449.27<br>(404.72 to 493.20)       | 474.64<br>(436.20 to 514.47)       | 507.12<br>(467.88 to 548.00)       | 471.35<br>(421.80 to 521.93)       | 415.52<br>(367.54 to 461.60)       | 358.60<br>(326.25 to 393.15)       | 341.80<br>(307.25 to 378.59)       | 337.92<br>(289.98 to 392.14)       | 253.58<br>(196.10 to 318.21)       |
| Sub-Saharan Africa           | 2,928.99<br>(2,750.59 to 3,100.66) | 3,021.29<br>(2,838.87 to 3,195.05) | 3,096.38<br>(2,930.95 to 3,239.41) | 3,204.60<br>(3,051.82 to 3,347.91) | 3,352.00<br>(3,205.75 to 3,481.76) | 3,485.63<br>(3,302.04 to 3,661.63) | 3,520.81<br>(3,332.03 to 3,699.38) | 3,396.64<br>(3,224.25 to 3,563.92) | 3,169.59<br>(2,981.77 to 3,368.22) | 2,654.30<br>(2,464.11 to 2,878.44) |
| Southern Sub-Saharan Africa  | 116.35<br>(103.97 to 131.00)       | 117.15<br>(105.31 to 130.08)       | 119.30<br>(107.96 to 131.87)       | 115.64<br>(104.58 to 128.48)       | 106.79<br>(99.05 to 115.01)        | 104.46<br>(98.84 to 110.22)        | 118.28<br>(110.35 to 126.98)       | 129.23<br>(117.72 to 141.80)       | 115.16<br>(102.56 to 129.19)       | 86.51<br>(73.63 to 101.50)         |
| Botswana                     | 2.55<br>(1.81 to 3.36)             | 2.34<br>(1.60 to 3.08)             | 2.29<br>(1.61 to 2.94)             | 2.19<br>(1.50 to 2.90)             | 1.99<br>(1.41 to 2.63)             | 2.50<br>(1.62 to 3.44)             | 2.91<br>(1.77 to 4.40)             | 2.28<br>(1.45 to 3.30)             | 1.41<br>(0.94 to 2.01)             | 0.81<br>(0.47 to 1.33)             |
| Lesotho                      | 4.39<br>(3.58 to 5.20)             | 4.42<br>(3.59 to 5.33)             | 4.34<br>(3.42 to 5.42)             | 4.02<br>(3.30 to 5.40)             | 4.32<br>(3.07 to 5.06)             | 4.26<br>(3.33 to 5.26)             | 5.20<br>(4.14 to 6.37)             | 5.84<br>(4.94 to 6.90)             | 4.89<br>(3.99 to 5.94)             | 3.70<br>(2.78 to 4.90)             |
| Namibia                      | 3.11<br>(2.42 to 3.94)             | 3.29<br>(2.76 to 3.93)             | 3.52<br>(3.02 to 4.10)             | 3.29<br>(2.83 to 3.81)             | 3.67<br>(3.22 to 4.23)             | 3.46<br>(2.99 to 3.96)             | 3.89<br>(3.32 to 4.61)             | 3.92<br>(3.29 to 4.63)             | 3.50<br>(2.75 to 4.39)             | 2.60<br>(1.65 to 3.85)             |
| South Africa                 | 82.40<br>(70.16 to 97.01)          | 82.70<br>(71.20 to 95.62)          | 83.84<br>(73.05 to 96.27)          | 81.15<br>(70.51 to 93.26)          | 71.53<br>(64.07 to 79.34)          | 65.12<br>(60.24 to 69.98)          | 73.20<br>(66.03 to 80.45)          | 78.86<br>(68.49 to 90.62)          | 63.87<br>(52.52 to 77.50)          | 46.30<br>(35.52 to 60.49)          |
| Swaziland                    | 3.27<br>(2.26 to 4.52)             | 2.89<br>(2.11 to 3.84)             | 2.24<br>(2.01 to 3.23)             | 2.24<br>(1.85 to 2.64)             | 1.99<br>(1.64 to 2.35)             | 2.15<br>(1.79 to 2.51)             | 3.11<br>(2.60 to 3.62)             | 3.74<br>(3.17 to 4.34)             | 3.16<br>(2.74 to 3.65)             | 2.17<br>(1.65 to 2.77)             |

Appendix Table 12A. Under-5 death numbers by location, both sexes combined, 1970, 1975, 1980, 1985, 1990, 1995, 2000, 2005, 2010, 2016

| Location                         | 1970                               | 1975                               | 1980                               | 1985                               | 1990                               | 1995                               | 2000                               | 2005                               | 2010                             | 2016                         |
|----------------------------------|------------------------------------|------------------------------------|------------------------------------|------------------------------------|------------------------------------|------------------------------------|------------------------------------|------------------------------------|----------------------------------|------------------------------|
| Cameroon                         | 62 91<br>(58 37 to 67 57)          | 60 88<br>(56 19 to 65 39)          | 60 08<br>(55 41 to 64 92)          | 59 60<br>(55 24 to 64 34)          | 63 26<br>(58 39 to 68 19)          | 72 37<br>(65 94 to 78 92)          | 78 31<br>(69 44 to 88 32)          | 81 68<br>(71 51 to 92 82)          | 82 65<br>(70 24 to 96 43)        | 75 66<br>(60 31 to 95 30)    |
| Cape Verde                       | 1 62<br>(1 51 to 1 74)             | 1 19<br>(1 12 to 1 27)             | 0 87<br>(0 83 to 0 92)             | 1 04<br>(0 97 to 1 11)             | 0 80<br>(0 73 to 0 87)             | 0 95<br>(0 74 to 1 16)             | 0 61<br>(0 52 to 0 71)             | 0 49<br>(0 41 to 0 58)             | 0 36<br>(0 30 to 0 42)           | 0 26<br>(0 22 to 0 31)       |
| Chad                             | 43 45<br>(39 05 to 48 08)          | 45 08<br>(41 54 to 48 93)          | 47 27<br>(44 22 to 50 41)          | 49 43<br>(46 48 to 52 51)          | 50 71<br>(47 64 to 53 97)          | 54 89<br>(51 05 to 58 67)          | 62 91<br>(58 38 to 67 53)          | 67 59<br>(61 95 to 73 29)          | 69 32<br>(61 84 to 77 92)        | 69 12<br>(59 74 to 80 70)    |
| Cote d'Ivoire                    | 49 58<br>(42 35 to 56 22)          | 50 56<br>(43 85 to 56 74)          | 52 82<br>(47 53 to 58 97)          | 62 25<br>(55 79 to 68 30)          | 69 04<br>(59 89 to 77 99)          | 74 37<br>(64 98 to 84 01)          | 78 02<br>(67 94 to 88 28)          | 78 88<br>(62 74 to 95 10)          | 75 21<br>(59 05 to 91 91)        | 68 57<br>(50 87 to 87 78)    |
| The Gambia                       | 4 59<br>(3 88 to 5 44)             | 4 55<br>(3 84 to 5 33)             | 4 57<br>(3 93 to 5 24)             | 4 44<br>(3 80 to 5 09)             | 4 80<br>(4 09 to 5 51)             | 4 95<br>(4 21 to 5 71)             | 4 93<br>(4 23 to 5 61)             | 4 65<br>(3 90 to 5 40)             | 4 25<br>(3 54 to 5 09)           | 3 85<br>(3 07 to 4 73)       |
| Ghana                            | 65 96<br>(57 25 to 74 60)          | 64 39<br>(54 91 to 73 51)          | 64 22<br>(55 55 to 72 66)          | 69 20<br>(60 29 to 77 89)          | 67 74<br>(60 71 to 74 65)          | 63 26<br>(55 55 to 71 12)          | 60 51<br>(51 97 to 69 62)          | 63 09<br>(55 04 to 72 57)          | 63 27<br>(55 14 to 72 15)        | 48 35<br>(38 13 to 60 17)    |
| Guinea                           | 55 33<br>(48 59 to 62 21)          | 55 32<br>(50 68 to 60 46)          | 52 04<br>(48 48 to 55 79)          | 51 77<br>(48 62 to 55 01)          | 52 60<br>(49 67 to 55 71)          | 58 72<br>(54 96 to 62 66)          | 57 11<br>(52 91 to 61 56)          | 54 08<br>(49 06 to 59 30)          | 50 61<br>(44 45 to 57 69)        | 44 46<br>(36 76 to 54 58)    |
| Guinea-Bissau                    | 9 06<br>(7 93 to 10 36)            | 9 02<br>(7 97 to 10 18)            | 8 99<br>(8 06 to 9 98)             | 8 99<br>(8 22 to 9 81)             | 8 56<br>(7 92 to 9 29)             | 8 14<br>(7 51 to 8 77)             | 7 76<br>(7 13 to 8 40)             | 7 60<br>(6 85 to 8 40)             | 6 23<br>(5 55 to 6 92)           | 4 88<br>(4 21 to 5 63)       |
| Liberia                          | 20 25<br>(18 10 to 22 63)          | 20 26<br>(18 27 to 22 31)          | 20 87<br>(18 86 to 23 01)          | 22 29<br>(20 17 to 24 37)          | 20 81<br>(19 08 to 22 69)          | 19 41<br>(17 76 to 21 10)          | 19 94<br>(18 28 to 21 68)          | 15 67<br>(14 23 to 17 16)          | 13 24<br>(11 71 to 14 92)        | 10 15<br>(8 42 to 12 12)     |
| Mali                             | 101 65<br>(94 62 to 109 07)        | 100 93<br>(94 89 to 106 90)        | 96 33<br>(91 07 to 101 83)         | 95 42<br>(90 13 to 100 66)         | 90 64<br>(85 96 to 95 39)          | 92 32<br>(86 95 to 98 18)          | 95 06<br>(88 78 to 101 94)         | 93 99<br>(86 51 to 102 26)         | 89 83<br>(80 35 to 100 41)       | 84 21<br>(69 73 to 102 12)   |
| Mauritania                       | 7 24<br>(6 88 to 7 64)             | 7 58<br>(7 18 to 8 00)             | 7 51<br>(7 07 to 7 96)             | 7 45<br>(6 91 to 8 00)             | 7 34<br>(6 79 to 7 90)             | 7 45<br>(6 92 to 7 98)             | 7 69<br>(7 10 to 8 29)             | 7 90<br>(7 15 to 8 70)             | 6 89<br>(6 03 to 7 80)           | 5 55<br>(4 74 to 6 51)       |
| Niger                            | 78 24<br>(71 67 to 85 25)          | 87 60<br>(80 57 to 94 56)          | 94 87<br>(87 36 to 102 59)         | 104 01<br>(96 31 to 112 44)        | 111 49<br>(104 40 to 118 76)       | 118 03<br>(110 19 to 125 69)       | 115 67<br>(106 83 to 124 71)       | 106 00<br>(96 42 to 116 16)        | 97 14<br>(85 16 to 111 33)       | 91 69<br>(76 38 to 110 92)   |
| Nigeria                          | 695 85<br>(561 82 to 835 53)       | 688 90<br>(557 58 to 810 96)       | 691 59<br>(577 68 to 805 64)       | 693 63<br>(599 92 to 794 84)       | 761 28<br>(681 70 to 839 20)       | 824 58<br>(711 60 to 932 68)       | 872 73<br>(756 93 to 986 41)       | 887 37<br>(767 36 to 1,020 05)     | 857 94<br>(719 12 to 1,003 82)   | 717 18<br>(580 77 to 862 55) |
| Sao Tome and Principe            | 0 44<br>(0 42 to 0 46)             | 0 38<br>(0 35 to 0 41)             | 0 42<br>(0 39 to 0 45)             | 0 50<br>(0 48 to 0 53)             | 0 46<br>(0 43 to 0 50)             | 0 44<br>(0 40 to 0 48)             | 0 39<br>(0 35 to 0 44)             | 0 35<br>(0 30 to 0 40)             | 0 26<br>(0 23 to 0 30)           | 0 21<br>(0 18 to 0 25)       |
| Senegal                          | 48 49<br>(44 24 to 53 33)          | 49 20<br>(45 50 to 52 86)          | 45 70<br>(42 20 to 49 18)          | 43 07<br>(39 85 to 46 30)          | 41 40<br>(38 54 to 44 28)          | 42 52<br>(40 00 to 45 11)          | 39 78<br>(37 02 to 42 52)          | 37 82<br>(34 63 to 41 13)          | 33 26<br>(30 00 to 36 70)        | 27 14<br>(23 55 to 31 19)    |
| Sierra Leone                     | 34 34<br>(30 27 to 39 18)          | 34 45<br>(30 71 to 38 41)          | 35 68<br>(32 59 to 38 82)          | 36 51<br>(34 11 to 39 01)          | 37 17<br>(35 11 to 39 41)          | 34 40<br>(32 59 to 36 15)          | 32 44<br>(30 54 to 34 29)          | 34 28<br>(31 84 to 36 64)          | 32 70<br>(29 66 to 35 70)        | 27 47<br>(24 10 to 31 23)    |
| Togo                             | 19 47<br>(16 41 to 22 94)          | 19 47<br>(16 28 to 22 55)          | 18 82<br>(15 31 to 22 29)          | 20 12<br>(17 15 to 23 22)          | 21 29<br>(18 61 to 24 16)          | 21 38<br>(18 36 to 24 70)          | 21 35<br>(17 60 to 25 28)          | 21 54<br>(16 31 to 27 25)          | 19 91<br>(15 50 to 24 43)        | 16 50<br>(12 83 to 20 49)    |
| Eastern Sub-Saharan Africa       | 1,091 97<br>(1,048 33 to 1,135 33) | 1,175 08<br>(1,131 91 to 1,219 09) | 1,237 72<br>(1,196 03 to 1,278 22) | 1,320 19<br>(1,280 23 to 1,358 07) | 1,350 67<br>(1,313 05 to 1,389 45) | 1,353 05<br>(1,312 54 to 1,395 23) | 1,288 20<br>(1,251 16 to 1,326 56) | 1,153 76<br>(1,114 92 to 1,192 29) | 1,017 04<br>(975 31 to 1,058 16) | 813 26<br>(764 61 to 864 97) |
| Burundi                          | 40 18<br>(34 52 to 45 75)          | 41 04<br>(36 38 to 46 25)          | 42 56<br>(37 73 to 47 65)          | 41 98<br>(37 75 to 46 50)          | 44 32<br>(39 57 to 49 53)          | 44 97<br>(40 29 to 49 96)          | 42 86<br>(37 76 to 47 95)          | 39 21<br>(34 34 to 44 50)          | 38 14<br>(31 41 to 45 58)        | 38 83<br>(27 05 to 56 24)    |
| Comoros                          | 1 86<br>(1 54 to 2 20)             | 1 87<br>(1 64 to 2 11)             | 1 99<br>(1 77 to 2 23)             | 1 90<br>(1 69 to 2 12)             | 1 76<br>(1 56 to 1 94)             | 1 66<br>(1 48 to 1 85)             | 1 73<br>(1 52 to 1 97)             | 1 59<br>(1 34 to 1 87)             | 1 40<br>(1 15 to 1 66)           | 1 01<br>(0 77 to 1 35)       |
| Djibouti                         | 1 11<br>(0 91 to 1 32)             | 1 39<br>(1 17 to 1 63)             | 2 00<br>(1 69 to 2 31)             | 2 43<br>(2 08 to 2 78)             | 3 09<br>(2 59 to 3 56)             | 3 40<br>(2 81 to 3 99)             | 3 35<br>(2 77 to 3 92)             | 2 92<br>(2 31 to 3 63)             | 2 48<br>(1 80 to 3 33)           | 1 75<br>(1 15 to 2 62)       |
| Eritrea                          | 18 80<br>(16 02 to 21 97)          | 19 23<br>(16 60 to 21 73)          | 19 82<br>(17 61 to 22 10)          | 20 18<br>(17 73 to 22 84)          | 19 33<br>(17 00 to 21 75)          | 13 85<br>(11 97 to 15 83)          | 11 60<br>(9 85 to 13 57)           | 11 80<br>(9 48 to 14 31)           | 11 40<br>(8 92 to 14 37)         | 8 38<br>(6 21 to 11 18)      |
| Ethiopia                         | 286 99<br>(258 50 to 316 44)       | 324 61<br>(294 16 to 357 39)       | 324 83<br>(298 56 to 352 75)       | 331 28<br>(307 66 to 354 51)       | 354 84<br>(330 25 to 378 52)       | 356 05<br>(329 11 to 384 79)       | 334 31<br>(308 81 to 361 36)       | 280 60<br>(255 37 to 308 00)       | 215 63<br>(189 30 to 246 47)     | 144 77<br>(121 89 to 173 21) |
| Kenya                            | 76 60<br>(74 76 to 78 43)          | 80 42<br>(78 60 to 82 31)          | 81 71<br>(79 46 to 83 75)          | 84 72<br>(82 68 to 86 71)          | 89 71<br>(87 23 to 92 08)          | 101 00<br>(98 37 to 103 88)        | 101 75<br>(99 06 to 104 74)        | 91 24<br>(88 73 to 94 01)          | 74 71<br>(71 74 to 77 69)        | 59 02<br>(56 17 to 62 40)    |
| Madagascar                       | 54 93<br>(48 21 to 63 36)          | 59 99<br>(52 88 to 68 03)          | 67 61<br>(60 42 to 75 50)          | 78 47<br>(69 48 to 87 63)          | 76 07<br>(68 68 to 83 73)          | 78 03<br>(69 76 to 86 70)          | 76 27<br>(67 22 to 85 79)          | 72 63<br>(62 69 to 82 34)          | 75 17<br>(62 77 to 87 88)        | 69 16<br>(53 90 to 88 77)    |
| Malawi                           | 84 67<br>(75 76 to 93 96)          | 82 52<br>(74 82 to 90 46)          | 80 04<br>(73 40 to 87 30)          | 82 71<br>(76 10 to 90 18)          | 97 79<br>(90 02 to 105 71)         | 87 07<br>(80 17 to 94 91)          | 79 57<br>(72 65 to 86 88)          | 65 54<br>(59 01 to 71 94)          | 61 04<br>(52 98 to 69 86)        | 48 69<br>(39 20 to 61 92)    |
| Mozambique                       | 106 54<br>(90 40 to 124 53)        | 111 66<br>(96 09 to 127 87)        | 123 81<br>(107 14 to 140 61)       | 148 57<br>(130 94 to 166 29)       | 116 02<br>(98 23 to 132 77)        | 123 76<br>(107 25 to 140 35)       | 120 00<br>(108 04 to 132 36)       | 111 66<br>(101 16 to 122 32)       | 103 16<br>(90 45 to 115 67)      | 82 92<br>(68 27 to 99 34)    |
| Rwanda                           | 45 04<br>(40 98 to 49 13)          | 52 69<br>(47 98 to 57 64)          | 54 62<br>(50 03 to 59 60)          | 52 06<br>(47 69 to 57 02)          | 55 69<br>(50 92 to 60 78)          | 51 71<br>(46 01 to 57 60)          | 48 59<br>(42 65 to 54 63)          | 38 76<br>(34 38 to 43 64)          | 26 00<br>(22 65 to 29 64)        | 19 49<br>(15 24 to 24 85)    |
| Somalia                          | 25 00<br>(17 75 to 33 34)          | 31 94<br>(24 68 to 40 34)          | 39 42<br>(30 91 to 49 14)          | 43 35<br>(33 73 to 53 10)          | 39 33<br>(29 93 to 49 79)          | 35 77<br>(26 56 to 45 44)          | 34 64<br>(26 92 to 42 99)          | 32 15<br>(25 60 to 39 47)          | 39 07<br>(31 40 to 47 72)        | 28 45<br>(20 37 to 37 13)    |
| South Sudan                      | 54 98<br>(41 35 to 72 30)          | 56 89<br>(43 66 to 72 18)          | 60 18<br>(48 91 to 73 23)          | 65 68<br>(55 92 to 75 85)          | 63 13<br>(53 47 to 72 88)          | 50 58<br>(43 27 to 58 03)          | 48 54<br>(42 37 to 54 25)          | 50 68<br>(43 92 to 58 31)          | 54 84<br>(45 17 to 66 05)        | 61 48<br>(46 95 to 79 96)    |
| Tanzania                         | 152 63<br>(138 07 to 167 05)       | 158 65<br>(144 51 to 172 36)       | 165 48<br>(149 54 to 181 50)       | 174 05<br>(158 50 to 189 98)       | 180 25<br>(162 88 to 197 21)       | 189 71<br>(172 32 to 206 57)       | 174 77<br>(161 51 to 188 78)       | 156 83<br>(142 22 to 171 91)       | 136 54<br>(116 80 to 157 29)     | 108 48<br>(86 93 to 132 08)  |
| Uganda                           | 101 43<br>(93 00 to 109 40)        | 110 29<br>(103 56 to 117 59)       | 126 69<br>(119 24 to 134 13)       | 136 68<br>(129 91 to 143 80)       | 145 70<br>(138 38 to 153 00)       | 151 36<br>(143 74 to 158 95)       | 147 75<br>(140 94 to 154 90)       | 142 73<br>(135 00 to 150 64)       | 130 97<br>(120 50 to 141 95)     | 103 11<br>(90 12 to 118 30)  |
| Zambia                           | 40 82<br>(36 00 to 46 09)          | 41 43<br>(36 98 to 45 92)          | 46 43<br>(42 10 to 51 28)          | 55 52<br>(50 74 to 61 19)          | 62 93<br>(57 48 to 68 56)          | 63 46<br>(57 72 to 69 50)          | 61 70<br>(54 99 to 68 09)          | 54 71<br>(48 52 to 61 02)          | 45 85<br>(39 48 to 53 07)        | 37 29<br>(29 72 to 46 29)    |
| Central Sub-Saharan Africa       | 301 36<br>(196 50 to 405 05)       | 310 41<br>(202 96 to 416 93)       | 320 46<br>(219 89 to 409 90)       | 321 72<br>(222 99 to 406 43)       | 364 66<br>(249 86 to 462 49)       | 405 24<br>(278 86 to 518 83)       | 433 02<br>(296 86 to 554 55)       | 424 11<br>(313 96 to 528 82)       | 411 34<br>(286 86 to 534 49)     | 350 71<br>(236 86 to 481 88) |
| Angola                           | 60 60<br>(42 35 to 82 20)          | 65 42<br>(49 42 to 83 39)          | 73 64<br>(59 19 to 90 78)          | 83 37<br>(70 33 to 97 72)          | 96 62<br>(81 97 to 111 92)         | 97 01<br>(82 18 to 113 41)         | 102 67<br>(87 05 to 119 61)        | 96 26<br>(80 92 to 114 04)         | 85 53<br>(68 93 to 104 78)       | 59 18<br>(39 12 to 85 06)    |
| Central African Republic         | 13 22<br>(10 91 to 15 80)          | 14 38<br>(12 02 to 16 86)          | 14 99<br>(12 85 to 17 70)          | 16 90<br>(14 49 to 19 51)          | 18 58<br>(16 12 to 21 45)          | 20 78<br>(17 66 to 24 38)          | 23 37<br>(19 71 to 27 39)          | 23 66<br>(19 44 to 28 41)          | 23 72<br>(18 76 to 29 26)        | 22 78<br>(16 80 to 31 40)    |
| Congo                            | 9 75<br>(7 22 to 12 99)            | 9 45<br>(7 16 to 12 31)            | 8 87<br>(7 18 to 10 79)            | 8 10<br>(6 94 to 9 37)             | 8 64<br>(7 36 to 10 07)            | 10 23<br>(8 73 to 11 88)           | 12 08<br>(10 24 to 14 17)          | 11 25<br>(9 79 to 12 80)           | 10 08<br>(8 08 to 12 36)         | 8 42<br>(5 89 to 11 95)      |
| Democratic Republic of the Congo | 210 66<br>(107 13 to 317 45)       | 215 83<br>(111 23 to 319 40)       | 218 71<br>(118 45 to 307 44)       | 208 46<br>(112 18 to 292 24)       | 235 11<br>(123 44 to 331 80)       | 271 23<br>(146 18 to 382 00)       | 289 80<br>(160 11 to 407 57)       | 288 17<br>(178 80 to 391 17)       | 287 66<br>(163 85 to 407 51)     | 256 79<br>(148 94 to 383 25) |
| Equatorial Guinea                | 2 94<br>(2 15 to 3 83)             | 1 91<br>(1 51 to 2 36)             | 1 38<br>(1 12 to 1 68)             | 2 29<br>(1 82 to 2 84)             | 3 10<br>(2 49 to 3 87)             | 3 42<br>(2 78 to 4 13)             | 2 40<br>(1 88 to 3 01)             | 1 92<br>(1 39 to 2 56)             | 1 67<br>(1 14 to 2 33)           | 1 26<br>(0 83 to 1 88)       |
| Gabon                            | 4 18<br>(2 98 to 5 49)             | 3 43<br>(2 58 to 4 39)             | 2 87<br>(2 11 to 3 68)             | 2 61<br>(1 90 to 3 34)             | 2 60<br>(1 88 to 3 32)             | 2 57<br>(1 93 to 3 24)             | 2 68<br>(2 14 to 3 23)             | 2 85<br>(2 20 to 3 55)             | 2 68<br>(2 05 to 3 46)           | 2 29<br>(1 63 to 3 08)       |

Appendix Table 12B. Under-5 death numbers by location, males, 1970, 1975, 1980, 1985, 1990, 1995, 2000, 2005, 2010, 2016

| Location                  | 1970                               | 1975                               | 1980                               | 1985                               | 1990                               | 1995                               | 2000                               | 2005                               | 2010                               | 2016                               |
|---------------------------|------------------------------------|------------------------------------|------------------------------------|------------------------------------|------------------------------------|------------------------------------|------------------------------------|------------------------------------|------------------------------------|------------------------------------|
| Global                    | 8,731-04<br>(8,550-95 to 8,913-11) | 7,808-33<br>(7,657-37 to 7,956-20) | 7,018-65<br>(6,882-84 to 7,153-77) | 6,482-72<br>(6,359-81 to 6,602-51) | 5,862-67<br>(5,744-94 to 5,974-74) | 5,246-08<br>(5,127-65 to 5,362-99) | 4,662-01<br>(4,542-47 to 4,771-18) | 4,103-16<br>(3,997-69 to 4,207-25) | 3,556-82<br>(3,444-93 to 3,671-75) | 2,708-08<br>(2,584-39 to 2,837-97) |
| High SDI                  | 760-34<br>(708-19 to 816-17)       | 613-99<br>(576-19 to 649-73)       | 515-85<br>(481-93 to 550-04)       | 429-69<br>(404-59 to 455-54)       | 341-60<br>(322-34 to 361-96)       | 253-62<br>(239-93 to 270-04)       | 193-37<br>(181-43 to 208-26)       | 150-63<br>(136-29 to 170-88)       | 122-99<br>(109-39 to 143-05)       | 92-90<br>(81-46 to 111-71)         |
| High-middle SDI           | 200-35<br>(195-53 to 206-02)       | 142-76<br>(138-88 to 147-14)       | 109-30<br>(106-30 to 112-78)       | 83-51<br>(81-84 to 85-47)          | 70-65<br>(69-48 to 72-33)          | 52-88<br>(52-09 to 53-82)          | 43-18<br>(42-93 to 43-42)          | 38-51<br>(38-30 to 38-73)          | 33-56<br>(33-37 to 33-76)          | 29-80<br>(28-81 to 30-89)          |
| Middle SDI                | 3,463-17<br>(3,343-74 to 3,588-98) | 3,258-38<br>(3,152-49 to 3,363-98) | 3,036-98<br>(2,945-55 to 3,126-75) | 2,904-57<br>(2,813-68 to 2,989-01) | 2,670-16<br>(2,593-48 to 2,743-53) | 2,455-99<br>(2,370-56 to 2,548-10) | 2,215-24<br>(2,129-83 to 2,294-80) | 1,956-41<br>(1,878-70 to 2,038-17) | 1,678-18<br>(1,592-13 to 1,767-70) | 1,217-59<br>(1,128-40 to 1,311-10) |
| Low-middle SDI            | 1,297-88<br>(1,219-10 to 1,377-08) | 1,344-41<br>(1,271-45 to 1,413-55) | 1,365-50<br>(1,293-19 to 1,431-93) | 1,381-73<br>(1,315-03 to 1,451-61) | 1,381-29<br>(1,313-17 to 1,447-26) | 1,409-13<br>(1,325-30 to 1,479-94) | 1,393-93<br>(1,314-65 to 1,464-42) | 1,316-52<br>(1,246-37 to 1,379-30) | 1,227-89<br>(1,151-18 to 1,300-37) | 1,029-27<br>(952-97 to 1,107-11)   |
| Low SDI                   | 3,004-56<br>(2,916-60 to 3,098-33) | 2,445-26<br>(2,379-46 to 2,515-14) | 1,987-87<br>(1,929-58 to 2,049-29) | 1,680-33<br>(1,634-75 to 1,725-82) | 1,396-19<br>(1,362-35 to 1,434-32) | 1,072-06<br>(1,046-91 to 1,098-30) | 814-19<br>(794-48 to 832-50)       | 639-11<br>(622-25 to 655-54)       | 492-57<br>(476-07 to 508-51)       | 337-24<br>(319-06 to 357-80)       |
| High-income               | 230-48<br>(225-38 to 236-34)       | 166-11<br>(162-32 to 170-43)       | 120-03<br>(117-00 to 123-72)       | 90-20<br>(88-52 to 92-15)          | 78-66<br>(77-50 to 80-37)          | 59-58<br>(58-79 to 60-52)          | 50-13<br>(49-57 to 50-71)          | 44-89<br>(44-44 to 45-38)          | 39-52<br>(39-09 to 39-92)          | 35-08<br>(33-85 to 36-28)          |
| High-income North America | 54-26<br>(53-58 to 54-97)          | 37-51<br>(37-12 to 37-90)          | 33-49<br>(33-28 to 33-70)          | 29-25<br>(29-08 to 29-42)          | 27-81<br>(27-63 to 28-01)          | 21-85<br>(21-71 to 22-00)          | 19-76<br>(19-63 to 19-91)          | 17-32<br>(19-83 to 20-10)          | 17-32<br>(17-21 to 17-43)          | 16-05<br>(16-05 to 16-99)          |
| Canada                    | 4-71<br>(4-59 to 4-82)             | 3-44<br>(3-35 to 3-54)             | 2-62<br>(2-55 to 2-70)             | 2-06<br>(2-00 to 2-12)             | 1-88<br>(1-82 to 1-94)             | 1-53<br>(1-48 to 1-58)             | 1-15<br>(1-11 to 1-20)             | 1-18<br>(1-11 to 1-21)             | 1-18<br>(1-14 to 1-22)             | 1-19<br>(0-96 to 1-46)             |
| Greenland                 | 0-04<br>(0-04 to 0-05)             | 0-02<br>(0-02 to 0-03)             | 0-02<br>(0-02 to 0-02)             | 0-02<br>(0-02 to 0-02)             | 0-02<br>(0-02 to 0-03)             | 0-01<br>(0-01 to 0-02)             | 0-01<br>(0-01 to 0-01)             | 0-01<br>(0-01 to 0-01)             | 0-01<br>(0-01 to 0-01)             | 0-01<br>(-0-01 to 0-01)            |
| United States             | 49-48<br>(48-80 to 50-20)          | 34-02<br>(33-64 to 34-42)          | 30-83<br>(30-63 to 31-03)          | 27-15<br>(26-99 to 27-32)          | 25-89<br>(25-71 to 26-07)          | 20-30<br>(20-17 to 20-43)          | 18-59<br>(18-47 to 18-72)          | 17-78<br>(18-66 to 18-92)          | 16-12<br>(16-03 to 16-24)          | 15-33<br>(14-92 to 15-70)          |
| Australasia               | 3-96<br>(3-88 to 4-03)             | 2-98<br>(2-92 to 3-04)             | 2-17<br>(2-12 to 2-22)             | 2-02<br>(1-97 to 2-07)             | 1-75<br>(1-70 to 1-80)             | 1-31<br>(1-28 to 1-35)             | 1-14<br>(1-10 to 1-17)             | 1-07<br>(1-04 to 1-10)             | 1-03<br>(1-00 to 1-06)             | 0-84<br>(0-74 to 0-95)             |
| Australia                 | 3-20<br>(3-13 to 3-28)             | 2-36<br>(2-31 to 2-43)             | 1-71<br>(1-66 to 1-75)             | 1-61<br>(1-57 to 1-65)             | 1-38<br>(1-34 to 1-42)             | 1-03<br>(0-99 to 1-06)             | 0-89<br>(0-86 to 0-92)             | 0-85<br>(0-82 to 0-88)             | 0-81<br>(0-78 to 0-84)             | 0-66<br>(0-56 to 0-76)             |
| New Zealand               | 0-75<br>(0-73 to 0-78)             | 0-62<br>(0-60 to 0-64)             | 0-46<br>(0-45 to 0-48)             | 0-41<br>(0-39 to 0-42)             | 0-37<br>(0-36 to 0-38)             | 0-29<br>(0-27 to 0-30)             | 0-24<br>(0-23 to 0-26)             | 0-22<br>(0-21 to 0-23)             | 0-22<br>(0-21 to 0-23)             | 0-18<br>(0-15 to 0-22)             |
| High-income Asia Pacific  | 49-53<br>(44-69 to 55-33)          | 33-99<br>(30-29 to 38-17)          | 21-39<br>(18-52 to 24-99)          | 12-91<br>(11-26 to 14-86)          | 9-24<br>(8-12 to 10-84)            | 7-29<br>(6-55 to 8-15)             | 5-35<br>(5-26 to 5-44)             | 3-73<br>(3-66 to 3-80)             | 2-99<br>(2-94 to 3-05)             | 2-25<br>(2-04 to 2-49)             |
| Brunei                    | 0-14<br>(0-13 to 0-14)             | 0-11<br>(0-10 to 0-11)             | 0-08<br>(0-07 to 0-08)             | 0-05<br>(0-04 to 0-06)             | 0-05<br>(0-04 to 0-05)             | 0-04<br>(0-04 to 0-05)             | 0-04<br>(0-04 to 0-05)             | 0-04<br>(0-03 to 0-04)             | 0-03<br>(0-03 to 0-04)             | 0-03<br>(0-03 to 0-04)             |
| Japan                     | 19-24<br>(18-71 to 19-76)          | 14-75<br>(14-37 to 15-11)          | 9-30<br>(9-20 to 9-39)             | 6-12<br>(6-05 to 6-19)             | 4-47<br>(4-41 to 4-53)             | 3-98<br>(3-89 to 4-09)             | 2-96<br>(2-92 to 3-00)             | 2-28<br>(0-24 to 2-32)             | 1-88<br>(1-85 to 1-91)             | 1-39<br>(1-32 to 1-45)             |
| Singapore                 | 0-72<br>(0-69 to 0-74)             | 0-44<br>(0-43 to 0-46)             | 0-35<br>(0-33 to 0-36)             | 0-26<br>(0-25 to 0-27)             | 0-21<br>(0-20 to 0-22)             | 0-14<br>(0-13 to 0-15)             | 0-10<br>(0-09 to 0-10)             | 0-06<br>(0-06 to 0-07)             | 0-06<br>(0-05 to 0-06)             | 0-05<br>(0-04 to 0-06)             |
| South Korea               | 29-43<br>(24-77 to 35-09)          | 18-69<br>(14-89 to 22-87)          | 11-67<br>(8-82 to 15-27)           | 6-47<br>(4-82 to 8-37)             | 4-51<br>(3-38 to 6-13)             | 3-13<br>(2-41 to 3-99)             | 2-25<br>(2-17 to 2-32)             | 1-35<br>(1-29 to 1-41)             | 1-03<br>(0-98 to 1-07)             | 0-79<br>(0-59 to 1-01)             |
| Western Europe            | 87-10<br>(86-48 to 87-71)          | 59-91<br>(59-49 to 60-37)          | 41-11<br>(40-77 to 41-44)          | 29-42<br>(29-19 to 29-66)          | 24-56<br>(24-34 to 24-80)          | 16-97<br>(16-79 to 17-16)          | 13-99<br>(13-84 to 14-14)          | 12-02<br>(11-90 to 12-16)          | 10-91<br>(10-79 to 11-04)          | 9-20<br>(8-45 to 9-99)             |
| Austria                   | <0-01<br>(-0-01 to -0-01)          | <0-01<br>(-0-01 to -0-01)          | <0-01<br>(-0-01 to -0-01)          | <0-01<br>(-0-01 to -0-01)          | <0-01<br>(-0-01 to -0-01)          | <0-01<br>(-0-01 to -0-01)          | <0-01<br>(-0-01 to -0-01)          | <0-01<br>(-0-01 to -0-01)          | <0-01<br>(-0-01 to -0-01)          | <0-01<br>(-0-01 to -0-01)          |
| Belgium                   | 1-93<br>(1-87 to 2-00)             | 1-29<br>(1-24 to 1-34)             | 0-89<br>(0-85 to 0-92)             | 0-67<br>(0-64 to 0-70)             | 0-50<br>(0-48 to 0-53)             | 0-35<br>(0-33 to 0-37)             | 0-26<br>(0-24 to 0-27)             | 0-22<br>(0-21 to 0-24)             | 0-20<br>(0-19 to 0-22)             | 0-16<br>(0-12 to 0-21)             |
| Cyprus                    | 2-01<br>(1-98 to 2-05)             | 1-34<br>(1-31 to 1-37)             | 1-05<br>(1-03 to 1-08)             | 0-80<br>(0-77 to 0-82)             | 0-72<br>(0-70 to 0-74)             | 0-52<br>(0-50 to 0-53)             | 0-39<br>(0-38 to 0-41)             | 0-34<br>(0-33 to 0-35)             | 0-33<br>(0-32 to 0-34)             | 0-29<br>(0-25 to 0-35)             |
| Denmark                   | 0-32<br>(0-28 to 0-37)             | 0-19<br>(0-18 to 0-20)             | 0-15<br>(0-14 to 0-15)             | 0-11<br>(0-10 to 0-11)             | 0-09<br>(0-08 to 0-10)             | 0-06<br>(0-06 to 0-07)             | 0-04<br>(0-03 to 0-04)             | 0-03<br>(0-03 to 0-03)             | 0-02<br>(0-02 to 0-03)             | 0-02<br>(0-01 to 0-03)             |
| Finland                   | 0-74<br>(0-71 to 0-77)             | 0-52<br>(0-50 to 0-55)             | 0-35<br>(0-33 to 0-36)             | 0-30<br>(0-28 to 0-32)             | 0-33<br>(0-31 to 0-35)             | 0-26<br>(0-24 to 0-28)             | 0-21<br>(0-20 to 0-23)             | 0-18<br>(0-17 to 0-19)             | 0-14<br>(0-13 to 0-15)             | 0-13<br>(0-10 to 0-17)             |
| France                    | 0-61<br>(0-58 to 0-64)             | 0-48<br>(0-45 to 0-51)             | 0-33<br>(0-30 to 0-35)             | 0-26<br>(0-25 to 0-28)             | 0-25<br>(0-23 to 0-27)             | 0-18<br>(0-17 to 0-19)             | 0-14<br>(0-13 to 0-15)             | 0-13<br>(0-12 to 0-14)             | 0-10<br>(0-09 to 0-11)             | 0-07<br>(0-05 to 0-10)             |
| Germany                   | 9-01<br>(8-83 to 9-18)             | 7-13<br>(6-98 to 7-27)             | 5-68<br>(5-55 to 5-81)             | 4-47<br>(4-36 to 4-57)             | 3-94<br>(3-84 to 4-04)             | 2-56<br>(2-49 to 2-64)             | 2-36<br>(2-29 to 2-44)             | 1-96<br>(1-89 to 2-02)             | 1-89<br>(1-82 to 1-96)             | 1-71<br>(1-32 to 2-22)             |
| Greece                    | 15-98<br>(15-70 to 16-26)          | 10-10<br>(9-88 to 10-33)           | 7-41<br>(7-24 to 7-58)             | 5-22<br>(5-09 to 5-36)             | 4-52<br>(4-40 to 4-66)             | 2-91<br>(2-80 to 3-01)             | 2-32<br>(2-24 to 2-39)             | 1-85<br>(1-79 to 1-91)             | 1-58<br>(1-53 to 1-64)             | 1-42<br>(1-10 to 1-85)             |
| Iceland                   | 2-68<br>(2-61 to 2-74)             | 2-11<br>(2-06 to 2-17)             | 1-63<br>(1-59 to 1-68)             | 1-01<br>(0-97 to 1-04)             | 0-62<br>(0-60 to 0-65)             | 0-50<br>(0-48 to 0-52)             | 0-36<br>(0-35 to 0-38)             | 0-27<br>(0-26 to 0-29)             | 0-25<br>(0-24 to 0-27)             | 0-20<br>(0-15 to 0-26)             |
| Ireland                   | 0-04<br>(0-04 to 0-04)             | 0-03<br>(0-03 to 0-04)             | 0-02<br>(0-02 to 0-03)             | 0-02<br>(0-02 to 0-02)             | 0-02<br>(0-02 to 0-02)             | 0-01<br>(0-01 to 0-02)             | 0-01<br>(0-01 to 0-01)             | 0-01<br>(0-01 to 0-01)             | 0-01<br>(0-01 to 0-01)             | 0-01<br>(-0-01 to 0-01)            |
| Israel                    | 0-84<br>(0-81 to 0-88)             | 0-78<br>(0-75 to 0-81)             | 0-58<br>(0-56 to 0-61)             | 0-39<br>(0-36 to 0-41)             | 0-29<br>(0-27 to 0-30)             | 0-21<br>(0-19 to 0-22)             | 0-23<br>(0-21 to 0-24)             | 0-17<br>(0-16 to 0-19)             | 0-18<br>(0-17 to 0-19)             | 0-14<br>(0-10 to 0-20)             |
| Italy                     | 1-20<br>(1-12 to 1-28)             | 1-37<br>(1-33 to 1-42)             | 0-95<br>(0-92 to 0-99)             | 0-67<br>(0-66 to 0-68)             | 0-57<br>(0-53 to 0-70)             | 0-51<br>(0-53 to 0-58)             | 0-44<br>(0-49 to 0-53)             | 0-41<br>(0-43 to 0-46)             | 0-41<br>(0-39 to 0-43)             | 0-33<br>(0-29 to 0-39)             |
| Luxembourg                | 16-97<br>(16-66 to 17-32)          | 11-04<br>(10-81 to 11-26)          | 6-11<br>(5-96 to 6-26)             | 3-92<br>(3-81 to 4-04)             | 2-99<br>(2-90 to 3-10)             | 2-17<br>(2-09 to 2-25)             | 1-58<br>(1-51 to 1-66)             | 1-32<br>(1-27 to 1-37)             | 1-22<br>(1-17 to 1-27)             | 0-90<br>(0-61 to 1-28)             |
| Malta                     | 0-06<br>(0-06 to 0-07)             | 0-04<br>(0-04 to 0-04)             | 0-03<br>(0-03 to 0-04)             | 0-03<br>(0-02 to 0-03)             | 0-03<br>(0-02 to 0-03)             | 0-02<br>(0-02 to 0-02)             | 0-01<br>(0-01 to 0-02)             | 0-01<br>(0-01 to 0-01)             | 0-01<br>(0-01 to 0-01)             | 0-01<br>(0-01 to 0-01)             |
| Netherlands               | 0-09<br>(0-08 to 0-09)             | 0-07<br>(0-06 to 0-08)             | 0-06<br>(0-05 to 0-06)             | 0-05<br>(0-04 to 0-05)             | 0-04<br>(0-03 to 0-04)             | 0-03<br>(0-03 to 0-03)             | 0-02<br>(0-02 to 0-02)             | 0-02<br>(0-01 to 0-02)             | 0-02<br>(0-01 to 0-02)             | 0-01<br>(0-01 to 0-02)             |
| Norway                    | 2-19<br>(2-12 to 2-27)             | 1-43<br>(1-38 to 1-48)             | 1-12<br>(1-08 to 1-16)             | 0-97<br>(0-97 to 1-05)             | 0-73<br>(0-73 to 0-80)             | 0-77<br>(0-73 to 0-80)             | 0-60<br>(0-70 to 0-76)             | 0-46<br>(0-57 to 0-63)             | 0-46<br>(0-44 to 0-48)             | 0-38<br>(0-30 to 0-48)             |
| Portugal                  | 0-63<br>(0-60 to 0-65)             | 0-45<br>(0-43 to 0-47)             | 0-31<br>(0-29 to 0-32)             | 0-31<br>(0-29 to 0-33)             | 0-30<br>(0-28 to 0-32)             | 0-19<br>(0-18 to 0-21)             | 0-13<br>(0-16 to 0-18)             | 0-11<br>(0-12 to 0-14)             | 0-11<br>(0-10 to 0-12)             | 0-10<br>(0-08 to 0-12)             |
| Spain                     | 6-64<br>(6-52 to 6-76)             | 4-31<br>(4-18 to 4-45)             | 2-59<br>(2-53 to 2-65)             | 1-56<br>(1-53 to 1-59)             | 0-96<br>(0-93 to 0-98)             | 0-61<br>(0-59 to 0-63)             | 0-46<br>(0-44 to 0-48)             | 0-30<br>(0-29 to 0-32)             | 0-21<br>(0-21 to 0-22)             | 0-15<br>(0-12 to 0-17)             |
| Sweden                    | 12-05<br>(11-79 to 12-30)          | 8-43<br>(8-24 to 8-61)             | 4-93<br>(4-82 to 5-05)             | 2-90<br>(2-81 to 2-99)             | 2-13<br>(2-06 to 2-20)             | 1-43<br>(1-38 to 1-49)             | 1-17<br>(1-11 to 1-23)             | 0-99<br>(1-14 to 1-24)             | 0-77<br>(0-98 to 1-08)             | 0-57<br>(0-55 to 0-60)             |
| Stockholm                 | 0-87<br>(0-81 to 0-93)             | 0-62<br>(0-58 to 0-67)             | 0-45<br>(0-42 to 0-47)             | 0-48<br>(0-38 to 0-42)             | 0-28<br>(0-45 to 0-50)             | 0-20<br>(0-26 to 0-30)             | 0-20<br>(0-19 to 0-22)             | 0-20<br>(0-18 to 0-21)             | 0-20<br>(0-19 to 0-22)             | 0-18<br>(0-14 to 0-23)             |
| Sweden except Stockholm   | 0-13<br>(0-09 to 0-16)             | 0-10<br>(0-07 to 0-13)             | 0-08<br>(0-07 to 0-09)             | 0-07<br>(0-06 to 0-07)             | 0-05<br>(0-07 to 0-09)             | 0-04<br>(0-05 to 0-06)             | 0-04<br>(0-04 to 0-05)             | 0-04<br>(0-03 to 0-04)             | 0-04<br>(0-03 to 0-04)             | 0-04<br>(0-03 to 0-05)             |
| Switzerland               | 0-74<br>(0-69 to 0-79)             | 0-53<br>(0-49 to 0-57)             | 0-37<br>(0-35 to 0-40)             | 0-30<br>(0-31 to 0-36)             | 0-23<br>(0-37 to 0-42)             | 0-16<br>(0-21 to 0-24)             | 0-16<br>(0-15 to 0-18)             | 0-16<br>(0-15 to 0-17)             | 0-17<br>(0-15 to 0-18)             | 0-14<br>(0-10 to 0-19)             |
| United Kingdom            | 1-06<br>(1-02 to 1-09)             | 0-64<br>(0-61 to 0-67)             | 0-45<br>(0-43 to 0-47)             | 0-38<br>(0-36 to 0-40)             | 0-29<br>(0-38 to 0-42)             | 0-25<br>(0-28 to 0-31)             | 0-21<br>(0-24 to 0-27)             | 0-21<br>(0-19 to 0-22)             | 0-21<br>(0-18 to 0-21)             | 0-19<br>(0-14 to 0-25)             |
| England                   | 11-11<br>(10-87 to 11-36)          | 7-48<br>(7-31 to 7-65)             | 5-98<br>(5-90 to 6-07)             | 4-81<br>(4-76 to 4-86)             | 4-28<br>(4-24 to 4-33)             | 3-05<br>(3-02 to 3-09)             | 2-54<br>(2-51 to 2-58)             | 2-42<br>(2-39 to 2-45)             | 2-31<br>(2-29 to 2-34)             | 2-01<br>(1-95 to 2-09)             |
| East Midlands             | 8-82<br>(8-65 to 8-99)             | 5-92<br>(5-80 to 6-05)             | 4-83<br>(4-76 to 4-90)             | 3-93<br>(3-90 to 3-97)             | 3-60<br>(3-56 to 3-63)             | 2-54<br>(2-51 to 2-57)             | 2-14<br>(2-12 to 2-17)             | 2-05<br>(2-03 to 2-08)             | 2-05<br>(1-96 to 2-00)             | 1-73<br>(1-70 to 1-77)             |
| East of England           | 0-69<br>(0-66 to 0-72)             | 0-48<br>(0-46 to 0-50)             | 0-39<br>(0-38 to 0-41)             | 0-30<br>(0-29 to 0-31)             | 0-29<br>(0-28 to 0-31)             | 0-20<br>(0-20 to 0-21)             | 0-17<br>(0-17 to 0-18)             | 0-17<br>(0-16 to 0-18)             | 0-17<br>(0-15 to 0-17)             | 0-16<br>(0-15 to 0-16)             |
| Greater London            | 0-75<br>(0-69 to 0-80)             | 0-51<br>(0-46 to 0-56)             | 0-42<br>(0-40 to 0-45)             | 0-35<br>(0-34 to 0-36)             |                                    |                                    |                                    |                                    |                                    |                                    |

Appendix Table 12B. Under-5 death numbers by location, males, 1970, 1975, 1980, 1985, 1990, 1995, 2000, 2005, 2010, 2016

| Location                                         | 1970                         | 1975                         | 1980                         | 1985                         | 1990                         | 1995                         | 2000                         | 2005                         | 2010                         | 2016                        |
|--------------------------------------------------|------------------------------|------------------------------|------------------------------|------------------------------|------------------------------|------------------------------|------------------------------|------------------------------|------------------------------|-----------------------------|
| Yorkshire and the Humber                         | 1 00<br>(0.95 to 1.05)       | 0.66<br>(0.63 to 0.70)       | 0.54<br>(0.52 to 0.56)       | 0.44<br>(0.43 to 0.45)       | 0.39<br>(0.38 to 0.40)       | 0.29<br>(0.28 to 0.30)       | 0.25<br>(0.24 to 0.26)       | 0.24<br>(0.23 to 0.24)       | 0.21<br>(0.20 to 0.22)       | 0.18<br>(0.17 to 0.19)      |
| Northern Ireland                                 | 0.48<br>(0.44 to 0.52)       | 0.36<br>(0.33 to 0.38)       | 0.27<br>(0.25 to 0.29)       | 0.20<br>(0.18 to 0.22)       | 0.14<br>(0.13 to 0.16)       | 0.11<br>(0.10 to 0.13)       | 0.08<br>(0.07 to 0.09)       | 0.08<br>(0.08 to 0.09)       | 0.09<br>(0.08 to 0.09)       | 0.07<br>(0.04 to 0.10)      |
| Scotland                                         | 1.19<br>(1.14 to 1.23)       | 0.79<br>(0.75 to 0.82)       | 0.56<br>(0.54 to 0.59)       | 0.44<br>(0.41 to 0.46)       | 0.36<br>(0.34 to 0.38)       | 0.26<br>(0.24 to 0.27)       | 0.20<br>(0.19 to 0.21)       | 0.19<br>(0.17 to 0.20)       | 0.15<br>(0.14 to 0.16)       | 0.13<br>(0.10 to 0.18)      |
| Wales                                            | 0.63<br>(0.48 to 0.81)       | 0.41<br>(0.32 to 0.53)       | 0.33<br>(0.29 to 0.37)       | 0.24<br>(0.23 to 0.26)       | 0.18<br>(0.17 to 0.19)       | 0.14<br>(0.13 to 0.15)       | 0.12<br>(0.11 to 0.13)       | 0.10<br>(0.09 to 0.11)       | 0.10<br>(0.09 to 0.11)       | 0.08<br>(0.07 to 0.11)      |
| Southern Latin America                           | 35.64<br>(35.17 to 36.09)    | 31.71<br>(31.04 to 32.50)    | 21.87<br>(21.65 to 22.08)    | 16.61<br>(16.43 to 16.79)    | 15.30<br>(15.13 to 15.48)    | 12.14<br>(11.99 to 12.31)    | 9.90<br>(9.38 to 10.42)      | 8.12<br>(7.70 to 8.55)       | 7.27<br>(6.90 to 7.64)       | 6.27<br>(5.48 to 7.14)      |
| Argentina                                        | 21.04<br>(20.67 to 21.43)    | 20.61<br>(19.95 to 21.40)    | 15.48<br>(15.29 to 15.67)    | 12.12<br>(11.97 to 12.28)    | 11.31<br>(11.15 to 11.47)    | 9.27<br>(9.13 to 9.41)       | 7.84<br>(7.32 to 8.36)       | 6.46<br>(6.06 to 6.88)       | 5.74<br>(5.39 to 6.10)       | 4.98<br>(4.26 to 5.81)      |
| Chile                                            | 12.87<br>(12.62 to 13.10)    | 9.34<br>(9.16 to 9.51)       | 5.14<br>(5.04 to 5.24)       | 3.49<br>(3.43 to 3.56)       | 3.25<br>(3.19 to 3.32)       | 2.17<br>(2.11 to 2.22)       | 1.56<br>(1.53 to 1.60)       | 1.26<br>(1.21 to 1.30)       | 1.23<br>(1.12 to 1.33)       | 1.05<br>(0.84 to 1.30)      |
| Uruguay                                          | 1.72<br>(1.67 to 1.77)       | 1.76<br>(1.71 to 1.82)       | 1.24<br>(1.20 to 1.29)       | 0.99<br>(0.95 to 1.03)       | 0.74<br>(0.71 to 0.78)       | 0.71<br>(0.65 to 0.77)       | 0.50<br>(0.46 to 0.54)       | 0.40<br>(0.36 to 0.44)       | 0.29<br>(0.25 to 0.34)       | 0.25<br>(0.16 to 0.36)      |
| Central Europe, Eastern Europe, and Central Asia | 184.56<br>(173.04 to 197.44) | 169.64<br>(161.39 to 178.69) | 158.48<br>(152.14 to 165.52) | 153.28<br>(147.88 to 158.76) | 124.60<br>(120.36 to 129.13) | 98.15<br>(94.23 to 102.45)   | 72.31<br>(68.64 to 76.29)    | 60.84<br>(56.06 to 66.29)    | 53.52<br>(47.75 to 60.59)    | 44.73<br>(38.67 to 52.84)   |
| Eastern Europe                                   | 55.83<br>(49.68 to 63.78)    | 58.11<br>(52.96 to 64.41)    | 55.84<br>(52.24 to 60.08)    | 53.45<br>(51.25 to 56.21)    | 37.77<br>(36.07 to 39.59)    | 27.79<br>(26.45 to 29.22)    | 21.56<br>(20.37 to 22.94)    | 16.88<br>(15.83 to 18.16)    | 12.52<br>(13.29 to 15.36)    | 14.20<br>(11.06 to 14.34)   |
| Belarus                                          | 3.12<br>(2.49 to 3.85)       | 2.59<br>(2.10 to 3.12)       | 2.38<br>(1.95 to 2.86)       | 2.35<br>(1.96 to 2.81)       | 1.77<br>(1.47 to 2.13)       | 1.19<br>(0.98 to 1.42)       | 0.89<br>(0.73 to 1.08)       | 0.65<br>(0.52 to 0.80)       | 0.51<br>(0.40 to 0.64)       | 0.38<br>(0.28 to 0.51)      |
| Estonia                                          | 0.28<br>(0.26 to 0.29)       | 0.28<br>(0.26 to 0.30)       | 0.20<br>(0.28 to 0.32)       | 0.29<br>(0.27 to 0.31)       | 0.22<br>(0.21 to 0.24)       | 0.15<br>(0.14 to 0.17)       | 0.09<br>(0.08 to 0.09)       | 0.06<br>(0.05 to 0.07)       | 0.04<br>(0.04 to 0.05)       | 0.02<br>(0.02 to 0.03)      |
| Latvia                                           | 0.45<br>(0.42 to 0.48)       | 0.53<br>(0.50 to 0.56)       | 0.45<br>(0.42 to 0.48)       | 0.41<br>(0.39 to 0.44)       | 0.39<br>(0.36 to 0.41)       | 0.27<br>(0.25 to 0.29)       | 0.22<br>(0.13 to 0.16)       | 0.12<br>(0.11 to 0.13)       | 0.09<br>(0.08 to 0.10)       | 0.06<br>(0.04 to 0.09)      |
| Lithuania                                        | 0.74<br>(0.71 to 0.77)       | 0.72<br>(0.68 to 0.76)       | 0.57<br>(0.54 to 0.59)       | 0.63<br>(0.60 to 0.66)       | 0.45<br>(0.43 to 0.47)       | 0.38<br>(0.36 to 0.40)       | 0.22<br>(0.21 to 0.24)       | 0.15<br>(0.14 to 0.16)       | 0.11<br>(0.10 to 0.12)       | 0.08<br>(0.06 to 0.10)      |
| Moldova                                          | 3.06<br>(2.00 to 4.48)       | 2.84<br>(1.89 to 4.01)       | 2.75<br>(2.15 to 3.39)       | 2.29<br>(1.87 to 2.77)       | 1.49<br>(1.22 to 1.80)       | 1.16<br>(0.96 to 1.41)       | 0.78<br>(0.63 to 0.96)       | 0.44<br>(0.33 to 0.56)       | 0.43<br>(0.32 to 0.55)       | 0.31<br>(0.20 to 0.44)      |
| Russia                                           | 30.93<br>(30.54 to 31.37)    | 35.71<br>(35.26 to 36.18)    | 35.50<br>(35.03 to 36.00)    | 36.51<br>(36.00 to 37.05)    | 25.43<br>(25.11 to 25.75)    | 18.46<br>(18.16 to 18.77)    | 14.63<br>(14.30 to 14.99)    | 11.56<br>(11.38 to 11.74)    | 9.71<br>(9.57 to 9.85)       | 9.08<br>(8.25 to 10.00)     |
| Ukraine                                          | 15.25<br>(11.07 to 25.07)    | 15.44<br>(10.53 to 21.48)    | 13.91<br>(10.39 to 18.11)    | 13.91<br>(8.83 to 13.66)     | 8.02<br>(6.47 to 9.81)       | 6.18<br>(4.93 to 7.61)       | 4.80<br>(3.70 to 6.10)       | 3.91<br>(2.91 to 5.18)       | 3.31<br>(2.43 to 4.42)       | 2.60<br>(1.45 to 4.34)      |
| Central Europe                                   | 47.71<br>(45.31 to 50.63)    | 41.07<br>(39.07 to 43.31)    | 33.69<br>(32.31 to 35.23)    | 27.35<br>(26.40 to 28.37)    | 21.34<br>(20.78 to 21.90)    | 14.36<br>(14.04 to 14.70)    | 9.27<br>(9.01 to 9.55)       | 6.96<br>(6.75 to 7.20)       | 5.28<br>(5.12 to 5.46)       | 3.90<br>(3.33 to 4.59)      |
| Albania                                          | 3.16<br>(1.75 to 5.53)       | 2.53<br>(1.44 to 4.08)       | 2.28<br>(1.53 to 3.26)       | 2.27<br>(1.83 to 2.77)       | 1.87<br>(1.57 to 2.21)       | 1.43<br>(1.20 to 1.69)       | 0.81<br>(0.66 to 0.99)       | 0.49<br>(0.37 to 0.64)       | 0.35<br>(0.24 to 0.50)       | 0.31<br>(0.18 to 0.49)      |
| Bosnia and Herzegovina                           | 2.58<br>(1.85 to 3.56)       | 1.88<br>(1.39 to 2.51)       | 1.37<br>(1.09 to 1.72)       | 1.14<br>(1.08 to 1.20)       | 0.70<br>(0.67 to 0.73)       | 0.63<br>(0.56 to 0.72)       | 0.22<br>(0.21 to 0.24)       | 0.17<br>(0.16 to 0.18)       | 0.14<br>(0.13 to 0.15)       | 0.10<br>(0.08 to 0.12)      |
| Bulgaria                                         | 2.50<br>(2.42 to 2.58)       | 2.26<br>(2.19 to 2.33)       | 1.80<br>(1.74 to 1.87)       | 1.32<br>(1.27 to 1.37)       | 1.11<br>(1.07 to 1.16)       | 0.78<br>(0.74 to 0.82)       | 0.67<br>(0.63 to 0.71)       | 0.52<br>(0.49 to 0.55)       | 0.47<br>(0.44 to 0.50)       | 0.31<br>(0.19 to 0.51)      |
| Croatia                                          | 1.35<br>(0.92 to 1.93)       | 1.08<br>(0.77 to 1.43)       | 0.88<br>(0.69 to 1.10)       | 0.68<br>(0.64 to 0.72)       | 0.41<br>(0.39 to 0.43)       | 0.33<br>(0.31 to 0.36)       | 0.22<br>(0.20 to 0.23)       | 0.16<br>(0.15 to 0.17)       | 0.13<br>(0.12 to 0.14)       | 0.10<br>(0.08 to 0.12)      |
| Czech Republic                                   | 2.04<br>(1.97 to 2.11)       | 2.40<br>(2.32 to 2.47)       | 1.71<br>(1.64 to 1.78)       | 1.15<br>(1.10 to 1.19)       | 0.91<br>(0.87 to 0.96)       | 0.51<br>(0.49 to 0.54)       | 0.28<br>(0.26 to 0.30)       | 0.25<br>(0.23 to 0.27)       | 0.23<br>(0.21 to 0.25)       | 0.18<br>(0.13 to 0.24)      |
| Hungary                                          | 3.43<br>(3.31 to 3.54)       | 3.92<br>(3.79 to 4.05)       | 2.17<br>(2.09 to 2.24)       | 1.67<br>(1.60 to 1.74)       | 1.22<br>(1.17 to 1.28)       | 0.79<br>(0.75 to 0.83)       | 0.58<br>(0.54 to 0.61)       | 0.41<br>(0.38 to 0.44)       | 0.30<br>(0.28 to 0.32)       | 0.29<br>(0.20 to 0.40)      |
| Macedonia                                        | 1.53<br>(0.85 to 2.54)       | 1.23<br>(0.66 to 2.06)       | 1.15<br>(0.80 to 1.63)       | 0.88<br>(0.63 to 1.19)       | 0.67<br>(0.64 to 0.71)       | 0.43<br>(0.40 to 0.45)       | 0.23<br>(0.21 to 0.25)       | 0.18<br>(0.17 to 0.19)       | 0.13<br>(0.12 to 0.14)       | 0.12<br>(0.08 to 0.19)      |
| Montenegro                                       | 0.20<br>(0.13 to 0.31)       | 0.17<br>(0.11 to 0.27)       | 0.14<br>(0.09 to 0.21)       | 0.12<br>(0.08 to 0.18)       | 0.09<br>(0.06 to 0.12)       | 0.08<br>(0.07 to 0.09)       | 0.08<br>(0.07 to 0.09)       | 0.05<br>(0.04 to 0.05)       | 0.03<br>(0.03 to 0.03)       | 0.02<br>(0.02 to 0.03)      |
| Poland                                           | 11.83<br>(11.56 to 12.08)    | 10.64<br>(10.40 to 10.87)    | 9.82<br>(9.59 to 10.05)      | 8.11<br>(7.85 to 8.36)       | 5.77<br>(5.61 to 5.92)       | 3.77<br>(3.64 to 3.89)       | 2.01<br>(1.93 to 2.10)       | 1.54<br>(1.48 to 1.61)       | 1.32<br>(1.25 to 1.39)       | 0.93<br>(0.53 to 1.56)      |
| Romania                                          | 13.60<br>(13.36 to 13.84)    | 9.82<br>(9.61 to 10.02)      | 8.01<br>(7.85 to 8.17)       | 6.48<br>(6.33 to 6.63)       | 6.15<br>(6.02 to 6.29)       | 3.50<br>(3.39 to 3.61)       | 2.92<br>(2.82 to 3.01)       | 2.21<br>(2.12 to 2.32)       | 1.40<br>(1.34 to 1.45)       | 0.95<br>(0.77 to 1.19)      |
| Serbia                                           | 3.62<br>(2.39 to 5.19)       | 3.21<br>(2.16 to 4.61)       | 2.74<br>(1.89 to 3.79)       | 2.34<br>(1.68 to 3.11)       | 1.63<br>(1.26 to 2.09)       | 1.58<br>(1.52 to 1.63)       | 0.90<br>(0.74 to 1.08)       | 0.68<br>(0.56 to 0.82)       | 0.51<br>(0.48 to 0.54)       | 0.37<br>(0.31 to 0.44)      |
| Slovakia                                         | 1.41<br>(1.35 to 1.47)       | 1.55<br>(1.48 to 1.62)       | 1.31<br>(1.26 to 1.37)       | 0.97<br>(0.92 to 1.01)       | 0.66<br>(0.63 to 0.69)       | 0.45<br>(0.42 to 0.48)       | 0.30<br>(0.28 to 0.33)       | 0.26<br>(0.24 to 0.28)       | 0.23<br>(0.21 to 0.25)       | 0.19<br>(0.13 to 0.28)      |
| Slovenia                                         | 0.47<br>(0.33 to 0.66)       | 0.39<br>(0.30 to 0.51)       | 0.32<br>(0.27 to 0.37)       | 0.23<br>(0.21 to 0.24)       | 0.14<br>(0.13 to 0.14)       | 0.08<br>(0.07 to 0.09)       | 0.06<br>(0.05 to 0.06)       | 0.05<br>(0.04 to 0.05)       | 0.04<br>(0.04 to 0.04)       | 0.03<br>(0.02 to 0.03)      |
| Central Asia                                     | 81.02<br>(71.56 to 91.10)    | 70.46<br>(64.39 to 77.22)    | 68.95<br>(64.08 to 74.34)    | 72.47<br>(67.57 to 77.32)    | 65.50<br>(61.56 to 69.87)    | 56.00<br>(52.34 to 60.18)    | 41.49<br>(38.02 to 45.28)    | 37.00<br>(32.47 to 42.10)    | 34.05<br>(28.37 to 41.13)    | 28.32<br>(22.61 to 35.87)   |
| Armenia                                          | 3.59<br>(2.45 to 5.12)       | 3.06<br>(2.37 to 3.92)       | 3.11<br>(2.60 to 3.72)       | 2.78<br>(2.40 to 3.23)       | 2.06<br>(1.77 to 2.40)       | 1.26<br>(1.07 to 1.47)       | 0.69<br>(0.58 to 0.82)       | 0.54<br>(0.42 to 0.69)       | 0.42<br>(0.32 to 0.53)       | 0.32<br>(0.23 to 0.44)      |
| Azerbaijan                                       | 9.94<br>(6.88 to 13.72)      | 7.41<br>(5.34 to 10.09)      | 7.66<br>(6.09 to 9.57)       | 8.44<br>(7.05 to 9.93)       | 8.11<br>(6.79 to 9.63)       | 6.99<br>(5.76 to 8.21)       | 4.52<br>(3.88 to 5.50)       | 4.41<br>(3.62 to 5.58)       | 4.41<br>(3.11 to 5.94)       | 3.30<br>(2.09 to 4.94)      |
| Georgia                                          | 5.10<br>(3.79 to 6.74)       | 4.07<br>(3.20 to 5.10)       | 4.07<br>(2.52 to 3.89)       | 2.69<br>(2.29 to 3.15)       | 2.25<br>(1.95 to 2.57)       | 1.54<br>(1.34 to 1.78)       | 0.95<br>(0.99 to 1.33)       | 0.95<br>(0.75 to 1.18)       | 0.82<br>(0.61 to 1.07)       | 0.59<br>(0.42 to 0.82)      |
| Kazakhstan                                       | 13.50<br>(9.60 to 17.89)     | 12.00<br>(9.89 to 14.54)     | 10.92<br>(9.32 to 12.63)     | 9.95<br>(8.72 to 11.29)      | 9.95<br>(7.20 to 9.26)       | 8.24<br>(5.82 to 8.00)       | 6.87<br>(4.21 to 6.16)       | 5.13<br>(3.92 to 6.22)       | 4.37<br>(3.44 to 5.43)       | 3.10<br>(2.23 to 4.20)      |
| Kyrgyzstan                                       | 7.33<br>(5.83 to 9.25)       | 6.03<br>(5.04 to 7.16)       | 5.63<br>(4.84 to 6.46)       | 5.69<br>(5.09 to 6.29)       | 4.81<br>(4.41 to 5.22)       | 3.61<br>(3.31 to 3.93)       | 2.84<br>(2.57 to 3.12)       | 2.57<br>(2.30 to 2.87)       | 2.57<br>(2.46 to 3.17)       | 2.54<br>(2.03 to 3.10)      |
| Mongolia                                         | 4.27<br>(3.26 to 5.35)       | 4.01<br>(3.09 to 5.01)       | 4.13<br>(3.33 to 5.00)       | 3.53<br>(3.55 to 4.80)       | 3.53<br>(3.13 to 3.95)       | 2.30<br>(2.02 to 2.61)       | 1.57<br>(1.37 to 1.79)       | 1.19<br>(1.00 to 1.38)       | 1.12<br>(0.93 to 1.34)       | 0.96<br>(0.71 to 1.25)      |
| Tajikistan                                       | 10.68<br>(7.86 to 14.33)     | 10.14<br>(7.94 to 12.91)     | 9.43<br>(7.84 to 11.27)      | 10.89<br>(9.04 to 12.95)     | 10.59<br>(9.11 to 12.29)     | 9.00<br>(7.73 to 10.46)      | 6.51<br>(5.28 to 7.85)       | 5.19<br>(4.32 to 6.27)       | 5.01<br>(3.89 to 6.31)       | 5.40<br>(3.36 to 8.24)      |
| Turkmenistan                                     | 6.78<br>(4.43 to 9.74)       | 6.10<br>(4.08 to 8.63)       | 5.88<br>(4.52 to 7.50)       | 6.26<br>(5.20 to 7.45)       | 5.96<br>(5.31 to 7.58)       | 4.79<br>(4.91 to 7.26)       | 3.93<br>(3.49 to 6.44)       | 3.26<br>(2.72 to 5.32)       | 2.60<br>(2.14 to 4.61)       | 2.60<br>(1.70 to 3.83)      |
| Uzbekistan                                       | 19.82<br>(13.90 to 26.90)    | 17.63<br>(13.85 to 22.00)    | 19.04<br>(15.61 to 22.93)    | 21.61<br>(18.36 to 25.28)    | 19.51<br>(16.42 to 22.77)    | 18.57<br>(15.88 to 21.76)    | 14.20<br>(11.56 to 17.23)    | 13.14<br>(9.32 to 17.80)     | 11.84<br>(6.94 to 18.29)     | 9.49<br>(4.99 to 16.18)     |
| Latin America and Caribbean                      | 571.97<br>(556.38 to 587.54) | 521.72<br>(509.51 to 533.32) | 456.70<br>(446.24 to 468.52) | 384.99<br>(376.28 to 393.70) | 315.98<br>(308.67 to 323.57) | 255.84<br>(249.56 to 262.72) | 199.82<br>(193.33 to 206.21) | 162.83<br>(157.59 to 168.58) | 148.30<br>(135.96 to 162.37) | 104.27<br>(98.37 to 111.04) |
| Central Latin America                            | 209.53<br>(204.13 to 215.15) | 193.05<br>(188.20 to 198.21) | 166.20<br>(161.94 to 170.88) | 141.27<br>(137.76 to 145.00) | 120.66<br>(117.23 to 124.14) | 102.80<br>(99.94 to 105.64)  | 82.75<br>(80.00 to 85.49)    | 67.16<br>(64.74 to 69.84)    | 55.26<br>(52.86 to 57.73)    | 42.76<br>(40.46 to 45.42)   |
| Colombia                                         | 33.74<br>(30.66 to 37.13)    | 29.41<br>(26.72 to 32.15)    | 23.15<br>(20.72 to 25.55)    | 20.65<br>(18.52 to 22.90)    | 16.94<br>(14.73 to 19.31)    | 15.27<br>(13.63 to 16.93)    | 12.69<br>(11.33 to 14.09)    | 11.11<br>(9.78 to 12.75)     | 9.04<br>(7.58 to 10.69)      | 6.04<br>(4.86 to 7.61)      |
| Costa Rica                                       | 2.26<br>(2.10 to 2.44)       | 1.58<br>(1.44 to 1.73)       | 1.26<br>(1.11 to 1.41)       | 1.10<br>(0.96 to 1.24)       | 0.91<br>(0.78 to 1.05)       | 0.75<br>(0.62 to 0.90)       | 0.66<br>(0.54 to 0.80)       | 0.56<br>(0.45 to 0.68)       | 0.48<br>(0.36 to 0.62)       | 0.35<br>(0.22 to 0.54)      |
| El Salvador                                      | 11.59<br>(10.06 to 13.20)    | 10.31<br>(9.19 to 11.48)     | 8.48<br>(7.60 to 9.42)       | 6.22<br>(5.58 to 6.89)       | 4.54<br>(4.00 to 5.13)       | 3.43<br>(2.93 to 4.00)       | 2.42<br>(2.04 to 2.84)       | 1.56<br>(1.23 to 1.94)       | 1.07<br>(0.82 to 1.37)       | 0.71<br>(0.48 to 1.02)      |
| Guatemala                                        | 22.31<br>(19.92 to 24.90)    | 20.65<br>(18.49 to 23.08)    | 18.38<br>(16.56 to 20.33)    | 16.38<br>(14.79 to 17.99)    | 14.76<br>(13.41 to 16.18)    | 13.08<br>(11.99 to 14.26)    | 11.28<br>(10.11 to 12.49)    | 9.54<br>(8.42 to 10.69)      | 7.66<br>(6.76 to 8.70)       | 6.10<br>(5.03 to 7.34)      |
| Honduras                                         | 7.91<br>(7.91 to 9.67)       | 7.07<br>(7.40 to 8.95)       | 6.26<br>(6.37 to 7.77)       | 5.37<br>(5.58 to 6.96)       | 4.43<br>(4.70 to 6.04)       | 3.58<br>(3.74 to 5.13)       | 3.02<br>(3.03 to 4.16)</     |                              |                              |                             |

Appendix Table 12B. Under-5 death numbers by location, males, 1970, 1975, 1980, 1985, 1990, 1995, 2000, 2005, 2010, 2016

| Location                               | 1970                               | 1975                               | 1980                               | 1985                               | 1990                               | 1995                         | 2000                         | 2005                         | 2010                         | 2016                         |
|----------------------------------------|------------------------------------|------------------------------------|------------------------------------|------------------------------------|------------------------------------|------------------------------|------------------------------|------------------------------|------------------------------|------------------------------|
| Peru                                   | 49 17<br>(43 48 to 55 09)          | 42 07<br>(38 75 to 45 23)          | 39 10<br>(35 55 to 42 63)          | 33 98<br>(31 15 to 36 67)          | 26 47<br>(24 63 to 28 52)          | 19 06<br>(17 44 to 20 81)    | 12 53<br>(11 41 to 13 61)    | 9 46<br>(8 40 to 10 60)      | 8 08<br>(7 20 to 8 98)       | 7 00<br>(5 46 to 8 93)       |
| Caribbean                              | 56 63<br>(48 99 to 64 41)          | 49 41<br>(42 05 to 56 10)          | 43 74<br>(37 06 to 50 95)          | 38 37<br>(33 23 to 43 83)          | 33 80<br>(28 88 to 38 57)          | 28 66<br>(24 66 to 33 04)    | 23 76<br>(19 23 to 28 81)    | 22 38<br>(18 53 to 26 60)    | 33 89<br>(21 69 to 46 83)    | 15 06<br>(10 96 to 20 90)    |
| Antigua and Barbuda                    | 0 04<br>(0 02 to 0 05)             | 0 03<br>(0 02 to 0 03)             | 0 02<br>(0 01 to 0 02)             | 0 01<br>(0 01 to 0 01)             | 0 01<br>(0 01 to 0 01)             | 0 01<br>(0 01 to 0 02)       | 0 01<br>(0 01 to 0 02)       | 0 01<br>(0 01 to 0 02)       | 0 01<br>(0 01 to 0 01)       | 0 01<br>(0 01 to 0 01)       |
| The Bahamas                            | 0 13<br>(0 09 to 0 19)             | 0 11<br>(0 07 to 0 16)             | 0 10<br>(0 06 to 0 15)             | 0 09<br>(0 05 to 0 13)             | 0 07<br>(0 04 to 0 12)             | 0 06<br>(0 04 to 0 09)       | 0 04<br>(0 03 to 0 06)       | 0 05<br>(0 03 to 0 06)       | 0 04<br>(0 03 to 0 07)       | 0 04<br>(0 02 to 0 09)       |
| Barbados                               | 0 13<br>(0 09 to 0 19)             | 0 09<br>(0 06 to 0 13)             | 0 07<br>(0 04 to 0 10)             | 0 05<br>(0 03 to 0 08)             | 0 04<br>(0 02 to 0 07)             | 0 03<br>(0 02 to 0 05)       | 0 03<br>(0 01 to 0 05)       | 0 03<br>(0 02 to 0 04)       | 0 03<br>(0 02 to 0 04)       | 0 02<br>(0 01 to 0 05)       |
| Belize                                 | 0 30<br>(0 23 to 0 37)             | 0 24<br>(0 20 to 0 30)             | 0 21<br>(0 17 to 0 25)             | 0 20<br>(0 16 to 0 24)             | 0 17<br>(0 14 to 0 20)             | 0 11<br>(0 08 to 0 14)       | 0 12<br>(0 09 to 0 15)       | 0 10<br>(0 07 to 0 15)       | 0 09<br>(0 06 to 0 13)       | 0 09<br>(0 04 to 0 17)       |
| Bermuda                                | 0 02<br>(0 01 to 0 02)             | 0 01<br>(0 01 to 0 01)             | 0 01<br>(0 01 to 0 01)             | 0 01<br>(0 01 to 0 01)             | 0 01<br>(0 01 to 0 01)             | <0 01<br>(0 01 to 0 01)      | <0 01<br>(0 01 to 0 01)      | <0 01<br>(0 01 to 0 01)      | <0 01<br>(0 01 to 0 01)      | <0 01<br>(0 01 to 0 01)      |
| Cuba                                   | 5 93<br>(5 84 to 6 04)             | 3 37<br>(3 30 to 3 43)             | 1 91<br>(1 86 to 1 96)             | 1 87<br>(1 81 to 1 94)             | 1 48<br>(1 44 to 1 53)             | 0 96<br>(0 94 to 0 99)       | 0 74<br>(0 72 to 0 76)       | 0 50<br>(0 49 to 0 52)       | 0 45<br>(0 43 to 0 46)       | 0 34<br>(0 27 to 0 43)       |
| Dominica                               | 0 09<br>(0 06 to 0 12)             | 0 04<br>(0 03 to 0 06)             | 0 02<br>(0 02 to 0 03)             | 0 02<br>(0 01 to 0 03)             | 0 02<br>(0 01 to 0 02)             | 0 01<br>(0 01 to 0 02)       | 0 01<br>(0 01 to 0 02)       | 0 01<br>(0 01 to 0 02)       | 0 01<br>(0 01 to 0 02)       | 0 01<br>(0 01 to 0 02)       |
| Dominican Republic                     | 11 25<br>(9 65 to 12 86)           | 10 95<br>(9 51 to 12 43)           | 9 58<br>(8 46 to 10 79)            | 7 48<br>(6 54 to 8 49)             | 6 61<br>(5 48 to 7 75)             | 5 62<br>(4 50 to 6 73)       | 4 51<br>(3 82 to 5 27)       | 4 41<br>(3 52 to 5 45)       | 3 79<br>(2 94 to 4 84)       | 2 94<br>(2 08 to 3 96)       |
| Grenada                                | 0 08<br>(0 05 to 0 13)             | 0 07<br>(0 04 to 0 11)             | 0 05<br>(0 03 to 0 09)             | 0 05<br>(0 02 to 0 09)             | 0 03<br>(0 02 to 0 05)             | 0 02<br>(0 01 to 0 03)       | 0 02<br>(0 01 to 0 03)       | 0 02<br>(0 01 to 0 02)       | 0 01<br>(0 01 to 0 02)       | 0 01<br>(0 01 to 0 03)       |
| Guyana                                 | 1 09<br>(0 95 to 1 24)             | 1 02<br>(0 91 to 1 15)             | 0 89<br>(0 78 to 1 01)             | 0 72<br>(0 60 to 0 85)             | 0 67<br>(0 52 to 0 81)             | 0 56<br>(0 44 to 0 67)       | 0 43<br>(0 35 to 0 53)       | 0 35<br>(0 28 to 0 42)       | 0 26<br>(0 21 to 0 32)       | 0 19<br>(0 14 to 0 26)       |
| Haiti                                  | 30 33<br>(22 89 to 37 81)          | 27 80<br>(21 02 to 34 37)          | 26 13<br>(19 70 to 32 91)          | 23 91<br>(18 77 to 29 03)          | 21 20<br>(16 69 to 25 43)          | 18 24<br>(14 70 to 22 42)    | 15 28<br>(10 81 to 20 08)    | 14 68<br>(10 97 to 18 81)    | 27 20<br>(15 08 to 39 52)    | 9 79<br>(5 95 to 15 19)      |
| Jamaica                                | 2 26<br>(1 87 to 2 69)             | 1 75<br>(1 43 to 2 15)             | 1 50<br>(1 08 to 2 02)             | 1 29<br>(0 94 to 1 71)             | 1 18<br>(0 80 to 1 72)             | 1 01<br>(0 65 to 1 50)       | 0 87<br>(0 56 to 1 29)       | 0 71<br>(0 42 to 1 14)       | 0 69<br>(0 34 to 1 27)       | 0 62<br>(0 33 to 1 05)       |
| Puerto Rico                            | 1 22<br>(1 19 to 1 25)             | 1 00<br>(0 97 to 1 02)             | 0 83<br>(0 81 to 0 85)             | 0 63<br>(0 61 to 0 66)             | 0 56<br>(0 54 to 0 58)             | 0 48<br>(0 45 to 0 52)       | 0 36<br>(0 33 to 0 40)       | 0 27<br>(0 24 to 0 31)       | 0 22<br>(0 19 to 0 25)       | 0 16<br>(0 12 to 0 20)       |
| Saint Lucia                            | 0 16<br>(0 09 to 0 28)             | 0 11<br>(0 07 to 0 18)             | 0 08<br>(0 05 to 0 12)             | 0 06<br>(0 03 to 0 10)             | 0 05<br>(0 03 to 0 08)             | 0 04<br>(0 02 to 0 06)       | 0 03<br>(0 02 to 0 05)       | 0 03<br>(0 02 to 0 04)       | 0 02<br>(0 01 to 0 04)       | 0 02<br>(0 01 to 0 03)       |
| Saint Vincent and the Grenadines       | 0 18<br>(0 12 to 0 25)             | 0 13<br>(0 08 to 0 19)             | 0 09<br>(0 06 to 0 13)             | 0 06<br>(0 04 to 0 09)             | 0 05<br>(0 03 to 0 07)             | 0 04<br>(0 02 to 0 06)       | 0 04<br>(0 02 to 0 04)       | 0 02<br>(0 02 to 0 03)       | 0 02<br>(0 01 to 0 03)       | 0 02<br>(0 01 to 0 03)       |
| Suriname                               | 0 51<br>(0 41 to 0 65)             | 0 41<br>(0 34 to 0 50)             | 0 37<br>(0 31 to 0 44)             | 0 36<br>(0 30 to 0 43)             | 0 32<br>(0 26 to 0 42)             | 0 27<br>(0 24 to 0 42)       | 0 23<br>(0 22 to 0 40)       | 0 23<br>(0 18 to 0 37)       | 0 23<br>(0 14 to 0 34)       | 0 23<br>(0 10 to 0 31)       |
| Trinidad and Tobago                    | 0 84<br>(0 73 to 0 96)             | 0 76<br>(0 65 to 0 88)             | 0 71<br>(0 59 to 0 86)             | 0 60<br>(0 49 to 0 74)             | 0 40<br>(0 31 to 0 50)             | 0 33<br>(0 23 to 0 44)       | 0 30<br>(0 22 to 0 40)       | 0 26<br>(0 19 to 0 36)       | 0 22<br>(0 11 to 0 38)       | 0 16<br>(0 06 to 0 37)       |
| Virgin Islands, U.S.                   | 0 05<br>(0 04 to 0 05)             | 0 04<br>(0 04 to 0 05)             | 0 04<br>(0 03 to 0 04)             | 0 03<br>(0 03 to 0 03)             | 0 02<br>(0 02 to 0 03)             | 0 02<br>(0 02 to 0 02)       | 0 01<br>(0 01 to 0 01)       | 0 01<br>(0 01 to 0 01)       | 0 01<br>(0 01 to 0 01)       | 0 01<br>(0 01 to 0 01)       |
| Tropical Latin America                 | 220 07<br>(210 39 to 230 77)       | 203 14<br>(194 86 to 211 83)       | 176 77<br>(170 02 to 184 08)       | 144 10<br>(139 30 to 148 69)       | 111 68<br>(107 98 to 115 34)       | 85 43<br>(82 21 to 88 56)    | 64 31<br>(61 63 to 67 24)    | 50 14<br>(47 68 to 52 70)    | 39 84<br>(37 15 to 42 75)    | 30 42<br>(28 16 to 32 53)    |
| Brazil                                 | 216 83<br>(207 11 to 227 45)       | 200 00<br>(191 91 to 208 58)       | 173 81<br>(167 13 to 180 90)       | 141 15<br>(136 37 to 145 77)       | 109 06<br>(105 52 to 112 73)       | 83 00<br>(79 80 to 86 14)    | 61 91<br>(59 25 to 64 87)    | 48 03<br>(45 52 to 50 50)    | 38 09<br>(35 50 to 40 88)    | 29 05<br>(26 88 to 31 13)    |
| Paraguay                               | 3 24<br>(2 87 to 3 66)             | 3 15<br>(2 80 to 3 52)             | 2 96<br>(2 57 to 3 37)             | 2 95<br>(2 64 to 3 29)             | 2 43<br>(2 37 to 2 92)             | 2 40<br>(2 08 to 2 83)       | 2 11<br>(2 04 to 2 81)       | 1 75<br>(1 75 to 2 52)       | 1 36<br>(1 33 to 2 28)       | 1 36<br>(0 99 to 1 84)       |
| Southeast Asia, East Asia, and Oceania | 2 448 48<br>(2 362 06 to 2 540 33) | 1 883 69<br>(1 821 50 to 1 948 98) | 1 495 23<br>(1 444 27 to 1 545 79) | 1 299 68<br>(1 258 49 to 1 341 07) | 1 113 26<br>(1 079 39 to 1 150 11) | 882 32<br>(847 50 to 919 38) | 668 50<br>(638 86 to 700 61) | 479 86<br>(461 10 to 501 17) | 364 67<br>(348 41 to 381 90) | 246 32<br>(230 46 to 262 79) |
| East Asia                              | 1 643 88<br>(1 567 01 to 1 729 45) | 1 169 96<br>(1 118 68 to 1 224 49) | 881 18<br>(840 92 to 922 65)       | 761 79<br>(727 77 to 795 36)       | 645 51<br>(618 05 to 676 72)       | 485 29<br>(458 92 to 516 86) | 335 10<br>(312 05 to 360 69) | 200 16<br>(191 41 to 209 24) | 140 45<br>(133 45 to 147 74) | 89 53<br>(81 62 to 98 57)    |
| China                                  | 1 619 91<br>(1 542 48 to 1 705 21) | 1 153 71<br>(1 101 34 to 1 207 46) | 868 92<br>(830 28 to 911 27)       | 749 95<br>(716 28 to 784 01)       | 634 14<br>(606 19 to 664 65)       | 446 75<br>(429 71 to 464 71) | 296 70<br>(285 76 to 309 05) | 186 96<br>(179 75 to 194 24) | 129 28<br>(123 88 to 135 11) | 80 04<br>(73 00 to 87 68)    |
| North Korea                            | 18 25<br>(12 08 to 25 92)          | 12 29<br>(7 93 to 17 37)           | 8 79<br>(5 60 to 12 85)            | 9 72<br>(6 32 to 14 22)            | 9 77<br>(6 15 to 14 54)            | 36 90<br>(16 16 to 60 03)    | 36 99<br>(17 82 to 58 26)    | 12 38<br>(8 18 to 18 21)     | 10 60<br>(6 84 to 15 75)     | 8 97<br>(5 74 to 14 05)      |
| Taiwan (Province of China)             | 5 71<br>(5 59 to 5 84)             | 3 96<br>(3 87 to 4 07)             | 3 47<br>(3 38 to 3 57)             | 2 12<br>(2 05 to 2 19)             | 1 59<br>(1 54 to 1 65)             | 1 63<br>(1 58 to 1 69)       | 1 41<br>(1 36 to 1 46)       | 0 83<br>(0 80 to 0 87)       | 0 57<br>(0 53 to 0 60)       | 0 52<br>(0 44 to 0 61)       |
| Southeast Asia                         | 794 92<br>(758 36 to 836 96)       | 703 99<br>(671 21 to 740 05)       | 604 82<br>(577 09 to 633 75)       | 528 72<br>(506 94 to 551 84)       | 458 46<br>(437 39 to 482 12)       | 387 67<br>(366 80 to 414 30) | 324 07<br>(305 42 to 344 86) | 270 37<br>(253 75 to 290 03) | 215 54<br>(201 23 to 231 38) | 149 20<br>(135 88 to 163 19) |
| Cambodia                               | 26 83<br>(21 91 to 32 20)          | 39 67<br>(27 06 to 52 85)          | 22 33<br>(19 26 to 25 83)          | 19 97<br>(17 31 to 22 79)          | 18 48<br>(16 46 to 20 50)          | 18 89<br>(17 06 to 21 01)    | 16 82<br>(15 17 to 18 59)    | 13 41<br>(11 92 to 15 07)    | 10 12<br>(8 65 to 11 63)     | 7 13<br>(5 66 to 8 76)       |
| Indonesia                              | 418 41<br>(403 57 to 432 85)       | 353 24<br>(338 09 to 368 42)       | 304 46<br>(293 79 to 315 96)       | 258 66<br>(249 26 to 268 58)       | 218 77<br>(211 32 to 226 59)       | 183 06<br>(177 99 to 188 63) | 151 87<br>(146 38 to 157 49) | 126 31<br>(121 31 to 131 48) | 101 67<br>(96 10 to 107 70)  | 66 95<br>(60 69 to 73 73)    |
| Laos                                   | 20 05<br>(12 19 to 30 34)          | 19 81<br>(12 87 to 28 05)          | 17 24<br>(12 24 to 22 75)          | 16 07<br>(11 94 to 20 06)          | 16 56<br>(12 74 to 20 51)          | 16 64<br>(12 72 to 20 94)    | 14 60<br>(11 51 to 18 00)    | 12 07<br>(9 11 to 15 35)     | 10 16<br>(6 50 to 14 92)     | 8 40<br>(4 22 to 14 47)      |
| Malaysia                               | 11 08<br>(10 86 to 11 30)          | 9 19<br>(8 67 to 9 66)             | 7 20<br>(6 56 to 7 84)             | 6 11<br>(5 95 to 6 26)             | 4 79<br>(4 67 to 4 92)             | 3 99<br>(3 89 to 4 09)       | 2 81<br>(2 73 to 2 90)       | 2 33<br>(2 14 to 2 29)       | 2 33<br>(2 18 to 2 49)       | 2 33<br>(1 40 to 2 05)       |
| Maldives                               | 0 63<br>(0 55 to 0 73)             | 0 54<br>(0 47 to 0 61)             | 0 39<br>(0 43 to 0 56)             | 0 39<br>(0 34 to 0 45)             | 0 26<br>(0 23 to 0 30)             | 0 09<br>(0 14 to 0 18)       | 0 09<br>(0 08 to 0 10)       | 0 06<br>(0 05 to 0 06)       | 0 06<br>(0 04 to 0 05)       | 0 03<br>(0 02 to 0 03)       |
| Mauritius                              | 1 03<br>(1 00 to 1 06)             | 0 77<br>(0 75 to 0 80)             | 0 54<br>(0 52 to 0 56)             | 0 31<br>(0 30 to 0 32)             | 0 29<br>(0 28 to 0 30)             | 0 26<br>(0 25 to 0 27)       | 0 21<br>(0 20 to 0 22)       | 0 16<br>(0 16 to 0 17)       | 0 12<br>(0 12 to 0 13)       | 0 11<br>(0 08 to 0 13)       |
| Myanmar                                | 86 61<br>(59 24 to 118 76)         | 77 63<br>(55 60 to 103 95)         | 71 63<br>(51 28 to 93 53)          | 67 93<br>(51 54 to 86 29)          | 64 24<br>(47 11 to 84 58)          | 58 63<br>(41 27 to 82 64)    | 51 78<br>(35 64 to 72 10)    | 41 38<br>(27 18 to 59 71)    | 26 81<br>(17 35 to 38 99)    | 15 25<br>(9 03 to 25 67)     |
| Philippines                            | 71 31<br>(66 17 to 76 47)          | 72 46<br>(65 49 to 77 18)          | 72 46<br>(66 32 to 78 67)          | 68 66<br>(63 51 to 73 84)          | 60 82<br>(56 12 to 66 17)          | 52 98<br>(48 89 to 57 12)    | 47 90<br>(43 87 to 52 18)    | 49 90<br>(40 30 to 49 27)    | 40 22<br>(34 89 to 46 22)    | 33 67<br>(27 72 to 40 57)    |
| Sri Lanka                              | 13 68<br>(13 38 to 13 98)          | 13 89<br>(13 49 to 14 30)          | 10 39<br>(10 18 to 10 61)          | 7 07<br>(6 90 to 7 24)             | 6 56<br>(6 26 to 6 88)             | 4 04<br>(3 93 to 4 15)       | 3 22<br>(3 12 to 3 33)       | 3 59<br>(3 49 to 3 69)       | 2 57<br>(2 35 to 2 80)       | 1 06<br>(0 67 to 1 61)       |
| Seychelles                             | 0 07<br>(0 07 to 0 08)             | 0 05<br>(0 05 to 0 05)             | 0 03<br>(0 03 to 0 04)             | 0 02<br>(0 02 to 0 03)             | 0 02<br>(0 02 to 0 02)             | 0 01<br>(0 01 to 0 01)       | 0 01<br>(0 01 to 0 01)       | 0 01<br>(0 01 to 0 01)       | 0 01<br>(0 01 to 0 01)       | 0 01<br>(0 01 to 0 01)       |
| Thailand                               | 67 24<br>(58 21 to 76 13)          | 55 97<br>(48 28 to 64 00)          | 41 05<br>(32 67 to 49 40)          | 27 68<br>(22 71 to 33 62)          | 19 79<br>(15 42 to 24 66)          | 13 61<br>(10 32 to 17 50)    | 9 21<br>(6 81 to 12 00)      | 5 92<br>(4 53 to 7 75)       | 3 73<br>(2 98 to 4 70)       | 2 07<br>(1 44 to 2 84)       |
| Timor-Leste                            | 3 53<br>(2 52 to 4 76)             | 3 56<br>(2 61 to 4 55)             | 3 17<br>(2 36 to 4 05)             | 2 44<br>(1 78 to 3 19)             | 2 07<br>(1 58 to 2 61)             | 1 69<br>(1 31 to 2 08)       | 1 08<br>(0 80 to 1 41)       | 0 93<br>(0 65 to 1 27)       | 0 66<br>(0 60 to 1 37)       | 0 66<br>(0 36 to 1 07)       |
| Vietnam                                | 73 25<br>(59 72 to 88 39)          | 57 56<br>(48 75 to 67 50)          | 53 14<br>(45 31 to 61 58)          | 52 78<br>(44 38 to 61 87)          | 45 22<br>(37 32 to 54 15)          | 33 27<br>(27 72 to 39 63)    | 24 07<br>(21 00 to 27 31)    | 19 32<br>(16 10 to 23 03)    | 16 57<br>(13 02 to 20 94)    | 12 00<br>(9 06 to 15 98)     |
| Oceania                                | 9 69<br>(8 03 to 11 52)            | 9 74<br>(8 13 to 11 48)            | 9 23<br>(7 79 to 10 74)            | 9 30<br>(7 73 to 10 77)            | 9 36<br>(7 64 to 11 18)            | 9 36<br>(7 37 to 11 69)      | 9 36<br>(6 79 to 12 48)      | 9 32<br>(6 09 to 13 48)      | 8 68<br>(5 33 to 13 32)      | 7 58<br>(4 59 to 12 20)      |
| American Samoa                         | 0 02<br>(0 02 to 0 02)             | 0 02<br>(0 02 to 0 02)             | 0 01<br>(0 01 to 0 02)             | 0 01<br>(0 01 to 0 02)             | 0 01<br>(0 01 to 0 02)             | 0 01<br>(0 01 to 0 02)       | 0 01<br>(0 01 to 0 02)       | 0 01<br>(0 01 to 0 01)       | 0 01<br>(0 01 to 0 01)       | 0 01<br>(0 01 to 0 01)       |
| Federated States of Micronesia         | 0 14<br>(0 10 to 0 20)             | 0 12<br>(0 08 to 0 16)             | 0 12<br>(0 09 to 0 16)             | 0 11<br>(0 08 to 0 14)             | 0 09<br>(0 07 to 0 12)             | 0 07<br>(0 05 to 0 10)       | 0 06<br>(0 04 to 0 08)       | 0 03<br>(0 02 to 0 04)       | 0 03<br>(0 01 to 0 04)       | 0 02<br>(0 01 to 0 03)       |
| Fiji                                   | 0 50<br>(0 44 to 0 57)             | 0 54<br>(0 43 to 0 66)             | 0 44<br>(0 33 to 0 57)             | 0 35<br>(0 25 to 0 46)             | 0 27<br>(0 18 to 0 40)             | 0 25<br>(0 18 to 0 34)       | 0 25<br>(0 18 to 0 30)       | 0 24<br>(0 19 to 0 30)       | 0 24<br>(0 18 to 0 32)       | 0 21<br>(0 12 to 0 35)       |
| Guam                                   | 0 04<br>(0 04 to 0 05)             | 0 04<br>(0 03 to 0 04)             | 0 03<br>(0 02 to 0 03)             | 0 03                               |                                    |                              |                              |                              |                              |                              |



Appendix Table 12B. Under-5 death numbers by location, males, 1970, 1975, 1980, 1985, 1990, 1995, 2000, 2005, 2010, 2016

| Location                     | 1970                               | 1975                               | 1980                               | 1985                               | 1990                               | 1995                               | 2000                               | 2005                               | 2010                               | 2016                               |
|------------------------------|------------------------------------|------------------------------------|------------------------------------|------------------------------------|------------------------------------|------------------------------------|------------------------------------|------------------------------------|------------------------------------|------------------------------------|
| Tonga                        | 0.07<br>(0.05 to 0.10)             | 0.07<br>(0.04 to 0.09)             | 0.06<br>(0.04 to 0.09)             | 0.06<br>(0.03 to 0.08)             | 0.05<br>(0.03 to 0.08)             | 0.05<br>(0.03 to 0.08)             | 0.04<br>(0.02 to 0.07)             | 0.04<br>(0.02 to 0.07)             | 0.04<br>(0.02 to 0.07)             | 0.03<br>(0.02 to 0.05)             |
| Vanuatu                      | 0.21<br>(0.14 to 0.29)             | 0.19<br>(0.12 to 0.27)             | 0.16<br>(0.11 to 0.24)             | 0.15<br>(0.11 to 0.20)             | 0.14<br>(0.11 to 0.18)             | 0.14<br>(0.11 to 0.19)             | 0.16<br>(0.12 to 0.20)             | 0.17<br>(0.13 to 0.23)             | 0.17<br>(0.12 to 0.23)             | 0.15<br>(0.09 to 0.24)             |
| North Africa and Middle East | 841.36<br>(783.56 to 905.55)       | 732.58<br>(678.07 to 779.47)       | 639.33<br>(595.05 to 688.35)       | 553.96<br>(514.49 to 593.24)       | 427.26<br>(400.15 to 455.86)       | 359.09<br>(332.03 to 389.48)       | 306.82<br>(278.90 to 334.90)       | 267.79<br>(238.39 to 299.24)       | 240.81<br>(212.35 to 273.10)       | 193.97<br>(160.49 to 231.11)       |
| North Africa and Middle East | 841.36<br>(783.56 to 905.55)       | 732.58<br>(678.07 to 779.47)       | 639.33<br>(595.05 to 688.35)       | 553.96<br>(514.49 to 593.24)       | 427.26<br>(400.15 to 455.86)       | 359.09<br>(332.03 to 389.48)       | 306.82<br>(278.90 to 334.90)       | 267.79<br>(238.39 to 299.24)       | 240.81<br>(212.35 to 273.10)       | 193.97<br>(160.49 to 231.11)       |
| Afghanistan                  | 60.09<br>(40.92 to 81.22)          | 63.54<br>(45.42 to 84.35)          | 64.73<br>(47.81 to 84.39)          | 52.96<br>(39.29 to 66.74)          | 39.71<br>(28.74 to 50.41)          | 48.24<br>(34.72 to 61.11)          | 51.37<br>(38.63 to 64.56)          | 50.96<br>(37.82 to 65.26)          | 42.34<br>(29.30 to 57.54)          | 39.32<br>(24.54 to 58.61)          |
| Algeria                      | 54.54<br>(44.48 to 64.80)          | 48.10<br>(39.17 to 57.08)          | 39.29<br>(32.12 to 46.50)          | 29.36<br>(23.15 to 35.42)          | 22.57<br>(17.72 to 27.67)          | 20.39<br>(15.36 to 26.51)          | 18.69<br>(14.20 to 23.63)          | 16.19<br>(12.45 to 20.08)          | 13.24<br>(9.41 to 17.66)           | 8.88<br>(5.83 to 13.23)            |
| Bahrain                      | 0.33<br>(0.24 to 0.43)             | 0.23<br>(0.18 to 0.29)             | 0.16<br>(0.14 to 0.18)             | 0.15<br>(0.14 to 0.16)             | 0.16<br>(0.15 to 0.17)             | 0.13<br>(0.11 to 0.14)             | 0.09<br>(0.08 to 0.10)             | 0.08<br>(0.08 to 0.09)             | 0.08<br>(0.07 to 0.09)             | 0.07<br>(0.05 to 0.09)             |
| Egypt                        | 173.46<br>(155.36 to 192.14)       | 157.37<br>(140.41 to 174.88)       | 129.32<br>(112.88 to 145.96)       | 98.13<br>(87.51 to 109.93)         | 71.57<br>(64.18 to 79.38)          | 51.49<br>(45.99 to 57.79)          | 39.95<br>(34.49 to 45.88)          | 35.42<br>(30.01 to 41.32)          | 32.89<br>(27.07 to 39.93)          | 22.88<br>(15.31 to 33.87)          |
| Iran                         | 171.10<br>(130.27 to 214.87)       | 111.28<br>(85.83 to 140.62)        | 97.27<br>(73.37 to 123.03)         | 87.71<br>(69.00 to 107.39)         | 71.95<br>(58.23 to 87.41)          | 40.13<br>(29.93 to 52.50)          | 28.70<br>(18.76 to 41.26)          | 24.92<br>(11.91 to 44.19)          | 21.24<br>(8.71 to 40.01)           | 15.80<br>(6.35 to 33.93)           |
| Iraq                         | 30.70<br>(16.37 to 41.17)          | 28.50<br>(15.02 to 37.51)          | 25.17<br>(12.62 to 33.46)          | 24.18<br>(11.74 to 32.83)          | 19.54<br>(8.12 to 28.45)           | 21.17<br>(8.83 to 32.41)           | 19.84<br>(10.57 to 29.15)          | 21.26<br>(14.54 to 28.34)          | 25.02<br>(14.27 to 34.63)          | 25.12<br>(12.21 to 37.90)          |
| Jordan                       | 4.46<br>(3.97 to 4.95)             | 4.03<br>(3.68 to 4.37)             | 2.76<br>(2.51 to 3.03)             | 2.26<br>(1.99 to 2.52)             | 1.96<br>(1.72 to 2.21)             | 2.24<br>(1.93 to 2.61)             | 2.02<br>(1.78 to 2.26)             | 1.87<br>(1.65 to 2.11)             | 1.89<br>(1.62 to 2.18)             | 1.76<br>(1.40 to 2.25)             |
| Kuwait                       | 0.92<br>(0.88 to 0.97)             | 1.08<br>(1.04 to 1.13)             | 0.90<br>(0.85 to 0.94)             | 0.63<br>(0.60 to 0.67)             | 0.36<br>(0.31 to 0.41)             | 0.31<br>(0.29 to 0.33)             | 0.29<br>(0.27 to 0.31)             | 0.29<br>(0.27 to 0.31)             | 0.34<br>(0.32 to 0.36)             | 0.28<br>(0.19 to 0.40)             |
| Lebanon                      | 3.07<br>(2.43 to 3.88)             | 3.16<br>(2.44 to 3.92)             | 3.05<br>(2.10 to 4.07)             | 1.73<br>(1.32 to 2.20)             | 1.19<br>(0.95 to 1.49)             | 0.82<br>(0.62 to 1.07)             | 0.53<br>(0.39 to 0.71)             | 0.37<br>(0.24 to 0.55)             | 0.31<br>(0.20 to 0.45)             | 0.32<br>(0.22 to 0.44)             |
| Libya                        | 4.56<br>(3.71 to 5.43)             | 3.72<br>(3.13 to 4.32)             | 2.99<br>(2.48 to 3.56)             | 2.60<br>(2.02 to 3.23)             | 2.40<br>(1.84 to 2.99)             | 2.16<br>(1.70 to 2.65)             | 1.98<br>(1.48 to 2.53)             | 1.62<br>(1.16 to 2.17)             | 1.09<br>(0.74 to 1.50)             | 0.62<br>(0.41 to 0.88)             |
| Morocco                      | 57.29<br>(52.55 to 62.08)          | 50.94<br>(47.24 to 54.65)          | 44.07<br>(40.87 to 47.40)          | 36.84<br>(33.79 to 39.95)          | 28.94<br>(26.24 to 31.60)          | 21.93<br>(19.43 to 24.25)          | 16.16<br>(13.84 to 18.53)          | 11.78<br>(9.48 to 14.55)           | 8.46<br>(6.47 to 10.92)            | 5.46<br>(3.90 to 7.46)             |
| Palestine                    | 2.22<br>(1.26 to 3.20)             | 2.11<br>(1.06 to 2.98)             | 1.85<br>(0.79 to 2.62)             | 1.51<br>(0.61 to 2.22)             | 1.68<br>(0.71 to 2.46)             | 1.54<br>(0.74 to 2.22)             | 1.64<br>(0.70 to 2.56)             | 1.72<br>(0.91 to 2.60)             | 2.21<br>(1.37 to 3.03)             | 2.14<br>(1.05 to 3.37)             |
| Oman                         | 5.15<br>(4.46 to 5.90)             | 4.48<br>(3.70 to 5.25)             | 3.60<br>(2.88 to 4.34)             | 2.63<br>(2.11 to 3.24)             | 1.82<br>(1.44 to 2.31)             | 1.21<br>(0.96 to 1.54)             | 0.78<br>(0.63 to 0.96)             | 0.39<br>(0.33 to 0.45)             | 0.41<br>(0.34 to 0.48)             | 0.40<br>(0.29 to 0.53)             |
| Qatar                        | 0.14<br>(0.10 to 0.20)             | 0.15<br>(0.11 to 0.20)             | 0.13<br>(0.09 to 0.18)             | 0.14<br>(0.10 to 0.18)             | 0.13<br>(0.09 to 0.18)             | 0.11<br>(0.08 to 0.16)             | 0.11<br>(0.07 to 0.13)             | 0.10<br>(0.07 to 0.15)             | 0.13<br>(0.09 to 0.18)             | 0.14<br>(0.09 to 0.20)             |
| Saudi Arabia                 | 23.30<br>(20.47 to 26.34)          | 21.00<br>(19.04 to 23.13)          | 19.14<br>(16.97 to 21.50)          | 18.93<br>(16.50 to 21.73)          | 16.54<br>(14.21 to 19.37)          | 12.25<br>(10.25 to 14.82)          | 9.28<br>(7.68 to 11.46)            | 6.34<br>(5.27 to 7.80)             | 3.91<br>(3.22 to 4.76)             | 1.74<br>(1.39 to 2.20)             |
| Sudan                        | 38.35<br>(30.97 to 46.14)          | 41.83<br>(32.43 to 50.96)          | 44.25<br>(34.76 to 54.40)          | 66.84<br>(49.77 to 84.93)          | 42.93<br>(36.38 to 49.84)          | 46.13<br>(38.18 to 54.02)          | 45.74<br>(36.75 to 55.83)          | 40.24<br>(30.17 to 50.39)          | 38.89<br>(28.15 to 51.02)          | 30.94<br>(17.62 to 52.59)          |
| Syria                        | 14.43<br>(13.02 to 15.91)          | 13.06<br>(11.32 to 14.64)          | 11.86<br>(10.14 to 13.59)          | 10.46<br>(9.03 to 13.36)           | 7.75<br>(6.44 to 12.53)            | 5.14<br>(4.34 to 9.09)             | 4.32<br>(3.60 to 5.10)             | 4.45<br>(3.61 to 5.39)             | 4.20<br>(3.61 to 5.39)             | 5.20<br>(2.36 to 6.06)             |
| Tunisia                      | 15.10<br>(13.70 to 16.60)          | 12.10<br>(11.15 to 13.09)          | 9.87<br>(9.09 to 10.71)            | 7.86<br>(6.92 to 8.85)             | 5.85<br>(5.22 to 6.51)             | 3.93<br>(3.47 to 4.44)             | 2.55<br>(2.22 to 2.93)             | 2.01<br>(1.71 to 2.35)             | 1.79<br>(1.47 to 2.15)             | 1.13<br>(0.83 to 1.49)             |
| Turkey                       | 131.07<br>(111.31 to 150.35)       | 122.26<br>(102.36 to 144.11)       | 100.63<br>(80.69 to 122.95)        | 72.60<br>(56.90 to 88.29)          | 51.36<br>(41.31 to 63.05)          | 40.38<br>(33.30 to 48.25)          | 29.22<br>(24.08 to 34.90)          | 20.53<br>(16.47 to 25.30)          | 15.81<br>(11.68 to 21.13)          | 10.63<br>(7.22 to 15.23)           |
| United Arab Emirates         | 0.64<br>(0.44 to 0.88)             | 0.79<br>(0.52 to 1.18)             | 1.04<br>(0.66 to 1.53)             | 0.95<br>(0.53 to 1.56)             | 0.71<br>(0.37 to 1.18)             | 0.59<br>(0.30 to 1.05)             | 0.45<br>(0.24 to 0.76)             | 0.36<br>(0.29 to 0.45)             | 0.61<br>(0.34 to 0.98)             | 0.50<br>(0.26 to 0.90)             |
| Yemen                        | 50.07<br>(24.00 to 65.14)          | 42.60<br>(20.41 to 54.50)          | 36.90<br>(18.92 to 47.02)          | 34.49<br>(18.82 to 43.75)          | 35.17<br>(24.76 to 43.08)          | 35.95<br>(21.95 to 46.85)          | 32.14<br>(17.26 to 43.91)          | 26.80<br>(14.71 to 37.78)          | 25.53<br>(14.32 to 36.59)          | 21.50<br>(9.62 to 34.62)           |
| South Asia                   | 2,876.67<br>(2,774.89 to 2,972.52) | 2,701.53<br>(2,620.05 to 2,785.38) | 2,471.88<br>(2,392.33 to 2,549.78) | 2,268.79<br>(2,193.22 to 2,342.31) | 1,995.19<br>(1,930.74 to 2,057.69) | 1,712.50<br>(1,663.75 to 1,764.36) | 1,467.41<br>(1,429.86 to 1,508.28) | 1,252.13<br>(1,216.51 to 1,291.68) | 991.97<br>(953.31 to 1,030.29)     | 636.49<br>(595.84 to 678.36)       |
| South Asia                   | 2,876.67<br>(2,774.89 to 2,972.52) | 2,701.53<br>(2,620.05 to 2,785.38) | 2,471.88<br>(2,392.33 to 2,549.78) | 2,268.79<br>(2,193.22 to 2,342.31) | 1,995.19<br>(1,930.74 to 2,057.69) | 1,712.50<br>(1,663.75 to 1,764.36) | 1,467.41<br>(1,429.86 to 1,508.28) | 1,252.13<br>(1,216.51 to 1,291.68) | 991.97<br>(953.31 to 1,030.29)     | 636.49<br>(595.84 to 678.36)       |
| Bangladesh                   | 342.24<br>(313.78 to 371.76)       | 289.76<br>(266.54 to 313.42)       | 273.35<br>(253.74 to 293.32)       | 269.25<br>(250.79 to 288.79)       | 241.63<br>(225.26 to 259.39)       | 188.24<br>(174.39 to 202.64)       | 145.55<br>(133.63 to 158.03)       | 116.31<br>(106.19 to 127.36)       | 85.56<br>(76.74 to 94.73)          | 51.84<br>(44.60 to 59.83)          |
| Bhutan                       | 1.82<br>(1.51 to 2.14)             | 1.82<br>(1.54 to 2.14)             | 1.75<br>(1.46 to 2.08)             | 1.56<br>(1.28 to 1.87)             | 1.37<br>(1.15 to 1.58)             | 1.03<br>(0.88 to 1.18)             | 0.85<br>(0.73 to 1.01)             | 0.66<br>(0.55 to 0.80)             | 0.46<br>(0.37 to 0.57)             | 0.27<br>(0.20 to 0.34)             |
| India                        | 2,245.47<br>(2,154.27 to 2,339.82) | 2,122.95<br>(2,049.23 to 2,195.42) | 1,899.56<br>(1,828.67 to 1,972.08) | 1,687.86<br>(1,621.28 to 1,753.92) | 1,465.50<br>(1,417.22 to 1,517.41) | 1,273.21<br>(1,232.86 to 1,320.00) | 1,105.30<br>(1,076.86 to 1,135.54) | 935.83<br>(908.49 to 964.97)       | 712.56<br>(686.53 to 739.34)       | 438.02<br>(413.32 to 465.25)       |
| Nepal                        | 62.49<br>(47.27 to 77.14)          | 62.79<br>(47.63 to 78.15)          | 61.15<br>(45.60 to 75.84)          | 56.41<br>(43.41 to 68.60)          | 49.89<br>(38.30 to 62.28)          | 40.46<br>(32.32 to 48.82)          | 32.44<br>(25.85 to 39.40)          | 23.39<br>(18.27 to 28.75)          | 18.23<br>(14.57 to 22.22)          | 13.07<br>(9.53 to 17.45)           |
| Pakistan                     | 224.66<br>(195.22 to 252.75)       | 224.20<br>(201.19 to 247.42)       | 236.06<br>(214.15 to 259.06)       | 253.71<br>(232.61 to 277.59)       | 236.81<br>(212.32 to 263.21)       | 209.56<br>(184.98 to 234.14)       | 183.26<br>(165.18 to 201.82)       | 175.93<br>(157.55 to 196.71)       | 175.16<br>(149.31 to 204.75)       | 133.30<br>(101.11 to 170.03)       |
| Sub-Saharan Africa           | 1,577.53<br>(1,478.55 to 1,673.38) | 1,633.07<br>(1,530.71 to 1,724.78) | 1,677.00<br>(1,584.59 to 1,759.51) | 1,731.81<br>(1,648.70 to 1,809.69) | 1,807.72<br>(1,727.50 to 1,880.84) | 1,878.60<br>(1,777.12 to 1,977.09) | 1,897.01<br>(1,794.51 to 1,995.54) | 1,834.82<br>(1,741.68 to 1,925.62) | 1,718.03<br>(1,613.91 to 1,828.88) | 1,447.21<br>(1,341.46 to 1,568.31) |
| Southern Sub-Saharan Africa  | 63.48<br>(56.50 to 71.76)          | 64.39<br>(57.68 to 71.52)          | 66.00<br>(59.72 to 73.14)          | 64.21<br>(57.75 to 71.36)          | 59.28<br>(54.89 to 63.87)          | 57.76<br>(54.55 to 61.05)          | 64.83<br>(60.24 to 69.86)          | 70.39<br>(64.11 to 77.14)          | 62.90<br>(56.07 to 70.75)          | 47.64<br>(40.33 to 56.34)          |
| Botswana                     | 1.37<br>(0.96 to 1.81)             | 1.26<br>(0.86 to 1.67)             | 1.25<br>(0.89 to 1.61)             | 1.22<br>(0.85 to 1.63)             | 1.12<br>(0.78 to 1.49)             | 1.39<br>(0.97 to 1.93)             | 1.62<br>(0.97 to 2.43)             | 1.28<br>(0.81 to 1.87)             | 0.80<br>(0.53 to 1.16)             | 0.47<br>(0.27 to 0.70)             |
| Lesotho                      | 2.29<br>(1.82 to 2.80)             | 2.29<br>(1.84 to 2.82)             | 2.26<br>(1.73 to 2.85)             | 2.31<br>(1.73 to 2.99)             | 2.22<br>(1.64 to 2.88)             | 2.38<br>(1.80 to 3.03)             | 2.92<br>(2.29 to 3.64)             | 3.28<br>(2.76 to 3.91)             | 2.76<br>(2.24 to 3.38)             | 2.10<br>(1.57 to 2.75)             |
| Namibia                      | 1.54<br>(1.20 to 1.94)             | 1.67<br>(1.40 to 2.00)             | 1.84<br>(1.55 to 2.17)             | 1.77<br>(1.50 to 2.08)             | 2.01<br>(1.71 to 2.34)             | 1.91<br>(1.61 to 2.21)             | 2.16<br>(1.80 to 2.57)             | 2.20<br>(1.80 to 2.65)             | 1.97<br>(1.52 to 2.49)             | 1.48<br>(0.92 to 2.22)             |
| South Africa                 | 45.25<br>(38.47 to 53.14)          | 45.64<br>(39.19 to 52.75)          | 46.43<br>(40.47 to 53.43)          | 44.91<br>(38.96 to 51.70)          | 39.39<br>(35.16 to 43.83)          | 35.68<br>(32.99 to 38.33)          | 39.69<br>(35.79 to 43.61)          | 42.46<br>(36.81 to 48.81)          | 34.48<br>(28.38 to 41.78)          | 25.19<br>(19.31 to 32.98)          |
| Swaziland                    | 1.72<br>(1.16 to 2.45)             | 1.54<br>(1.10 to 2.08)             | 1.39<br>(1.07 to 1.77)             | 1.24<br>(1.01 to 1.49)             | 1.12<br>(0.90 to 1.36)             | 1.21<br>(0.97 to 1.45)             | 1.74<br>(1.42 to 2.06)             | 2.08<br>(1.75 to 2.43)             | 1.77<br>(1.49 to 2.06)             | 1.23<br>(0.93 to 1.59)             |
| Zimbabwe                     | 11.30<br>(9.67 to 13.07)           | 11.98<br>(10.70 to 13.38)          | 12.82<br>(11.55 to 14.14)          | 12.75<br>(11.44 to 13.99)          | 13.43<br>(12.27 to 14.62)          | 15.18<br>(13.71 to 16.83)          | 16.70<br>(14.15 to 19.33)          | 19.09<br>(17.15 to 21.21)          | 21.12<br>(18.57 to 23.84)          | 17.18<br>(13.46 to 21.84)          |
| Western Sub-Saharan Africa   | 759.23<br>(682.48 to 837.93)       | 763.10<br>(691.46 to 831.00)       | 765.96<br>(702.63 to 831.56)       | 780.29<br>(722.65 to 837.77)       | 824.06<br>(778.30 to 873.66)       | 873.60<br>(808.14 to 934.72)       | 906.20<br>(840.00 to 968.08)       | 912.99<br>(843.31 to 987.39)       | 881.29<br>(803.59 to 962.92)       | 763.29<br>(686.58 to 845.33)       |
| Benin                        | 19.53<br>(17.75 to 21.38)          | 19.21<br>(17.57 to 20.80)          | 19.40<br>(17.84 to 20.99)          | 19.65<br>(17.86 to 21.46)          | 19.91<br>(17.84 to 22.04)          | 20.37<br>(18.18 to 22.59)          | 20.02<br>(17.74 to 22.35)          | 19.83<br>(17.31 to 22.09)          | 18.55<br>(15.92 to 21.75)          | 16.70<br>(13.67 to 20.43)          |
| Burkina Faso                 | 44.20<br>(31.81 to 54.72)          | 43.96<br>(31.64 to 54.48)          | 42.77<br>(31.70 to 52.83)          | 43.15<br>(32.38 to 52.42)          | 44.57<br>(36.06 to 51.73)          | 46.40<br>(38.93 to 53.71)          | 47.74<br>(38.14 to 56.29)          | 48.88<br>(37.29 to 59.69)          | 48.41<br>(35.88 to 60.75)          | 42.88<br>(29.61 to 55.98)          |
| Cameroon                     | 33.81<br>(31.26 to 36.45)          | 32.65<br>(30.01 to 35.27)          | 32.17<br>(29.52 to 35.01)          | 31.87<br>(29.43 to 34.55)          | 31.87<br>(29.43 to 34.55)          | 33.80<br>(31.21 to 36.57)          | 36.66<br>(34.94 to 42.39)          | 41.84<br>(36.83 to 47.50)          | 44.24<br>(37.99 to 49.91)          | 40.66<br>(37.34 to 52.07)          |
| Cape Verde                   | 0.86<br>(0.80 to 0.93)             | 0.63<br>(0.59 to 0.67)             | 0.47<br>(0.4                       |                                    |                                    |                                    |                                    |                                    |                                    |                                    |

Appendix Table 12B. Under-5 death numbers by location, males, 1970, 1975, 1980, 1985, 1990, 1995, 2000, 2005, 2010, 2016

| Location                         | 1970                         | 1975                         | 1980                         | 1985                         | 1990                         | 1995                         | 2000                         | 2005                         | 2010                         | 2016                         |
|----------------------------------|------------------------------|------------------------------|------------------------------|------------------------------|------------------------------|------------------------------|------------------------------|------------------------------|------------------------------|------------------------------|
| Liberia                          | 11 07<br>(9 80 to 12 51)     | 11 00<br>(9 82 to 12 21)     | 11 29<br>(10 03 to 12 63)    | 12 07<br>(10 74 to 13 40)    | 11 15<br>(10 13 to 12 30)    | 10 42<br>(9 46 to 11 36)     | 10 72<br>(9 82 to 11 69)     | 8 40<br>(7 54 to 9 29)       | 7 12<br>(6 17 to 8 15)       | 5 51<br>(4 48 to 6 70)       |
| Mali                             | 53 40<br>(49 14 to 57 93)    | 53 13<br>(49 47 to 57 06)    | 50 80<br>(47 56 to 54 20)    | 50 48<br>(47 50 to 53 58)    | 48 11<br>(45 23 to 51 06)    | 49 21<br>(46 14 to 52 50)    | 50 93<br>(47 25 to 55 25)    | 50 85<br>(45 97 to 56 28)    | 48 97<br>(43 04 to 55 64)    | 46 14<br>(37 35 to 57 07)    |
| Mauritania                       | 3 90<br>(3 69 to 4 14)       | 4 06<br>(3 80 to 4 32)       | 4 03<br>(3 77 to 4 31)       | 4 01<br>(3 71 to 4 33)       | 3 98<br>(3 67 to 4 29)       | 4 07<br>(3 73 to 4 40)       | 4 22<br>(3 86 to 4 59)       | 4 36<br>(3 89 to 4 84)       | 3 84<br>(3 32 to 4 39)       | 3 13<br>(2 63 to 3 72)       |
| Niger                            | 41 18<br>(37 41 to 45 34)    | 45 83<br>(41 79 to 49 77)    | 49 38<br>(45 04 to 53 83)    | 54 04<br>(49 63 to 58 98)    | 57 98<br>(53 86 to 62 29)    | 61 60<br>(57 20 to 65 97)    | 60 47<br>(55 42 to 65 77)    | 55 56<br>(50 07 to 61 61)    | 51 08<br>(44 23 to 59 23)    | 48 41<br>(39 81 to 59 32)    |
| Nigeria                          | 374 19<br>(300 95 to 452 89) | 374 55<br>(302 66 to 442 54) | 378 20<br>(314 04 to 443 32) | 377 70<br>(324 77 to 433 68) | 413 03<br>(369 81 to 458 95) | 445 93<br>(383 29 to 506 32) | 471 38<br>(407 94 to 533 48) | 479 51<br>(414 33 to 549 83) | 463 93<br>(388 18 to 542 96) | 388 12<br>(314 15 to 469 09) |
| Sao Tome and Principe            | 0 23<br>(0 22 to 0 25)       | 0 20<br>(0 19 to 0 22)       | 0 22<br>(0 20 to 0 25)       | 0 27<br>(0 25 to 0 29)       | 0 25<br>(0 23 to 0 27)       | 0 24<br>(0 21 to 0 27)       | 0 22<br>(0 19 to 0 25)       | 0 20<br>(0 17 to 0 23)       | 0 15<br>(0 13 to 0 18)       | 0 12<br>(0 10 to 0 15)       |
| Senegal                          | 25 09<br>(22 69 to 27 78)    | 25 68<br>(23 49 to 27 96)    | 24 23<br>(22 08 to 26 49)    | 23 35<br>(21 40 to 25 25)    | 22 35<br>(20 57 to 24 16)    | 22 89<br>(21 09 to 24 84)    | 21 79<br>(19 77 to 23 80)    | 20 93<br>(19 04 to 22 83)    | 18 66<br>(16 76 to 20 71)    | 15 41<br>(13 33 to 17 68)    |
| Sierra Leone                     | 17 87<br>(15 69 to 20 37)    | 17 93<br>(15 97 to 20 07)    | 18 60<br>(16 91 to 20 33)    | 19 10<br>(17 73 to 20 58)    | 19 52<br>(18 27 to 20 81)    | 18 05<br>(17 05 to 19 08)    | 17 12<br>(16 03 to 18 16)    | 18 14<br>(16 81 to 19 42)    | 17 33<br>(15 69 to 18 92)    | 14 60<br>(12 79 to 16 67)    |
| Togo                             | 10 63<br>(8 86 to 12 47)     | 10 45<br>(8 69 to 12 16)     | 10 03<br>(8 17 to 11 92)     | 10 75<br>(9 14 to 12 42)     | 11 42<br>(9 89 to 13 00)     | 11 51<br>(9 78 to 13 37)     | 11 55<br>(9 31 to 13 90)     | 11 68<br>(8 76 to 14 94)     | 10 85<br>(8 34 to 13 46)     | 9 08<br>(6 96 to 11 44)      |
| Eastern Sub-Saharan Africa       | 597 89<br>(570 79 to 626 13) | 643 41<br>(617 10 to 669 44) | 676 84<br>(651 62 to 700 16) | 717 58<br>(693 01 to 740 78) | 731 27<br>(707 85 to 754 51) | 731 98<br>(707 49 to 755 55) | 695 34<br>(673 71 to 716 72) | 625 01<br>(602 16 to 647 81) | 553 23<br>(527 40 to 579 84) | 446 35<br>(416 75 to 477 30) |
| Burundi                          | 20 86<br>(18 01 to 23 84)    | 21 39<br>(18 89 to 24 11)    | 22 32<br>(19 80 to 24 89)    | 22 14<br>(19 86 to 24 67)    | 23 48<br>(20 99 to 26 30)    | 23 87<br>(21 34 to 26 68)    | 22 81<br>(20 08 to 25 57)    | 20 97<br>(18 35 to 23 85)    | 20 50<br>(16 60 to 24 77)    | 21 02<br>(14 31 to 31 00)    |
| Comoros                          | 1 06<br>(0 84 to 1 28)       | 1 05<br>(0 90 to 1 21)       | 1 10<br>(0 97 to 1 25)       | 1 04<br>(0 91 to 1 18)       | 0 95<br>(0 83 to 1 07)       | 0 89<br>(0 78 to 1 00)       | 0 92<br>(0 79 to 1 06)       | 0 84<br>(0 70 to 1 00)       | 0 74<br>(0 59 to 0 92)       | 0 55<br>(0 38 to 0 78)       |
| Djibouti                         | 0 62<br>(0 50 to 0 74)       | 0 77<br>(0 64 to 0 92)       | 1 11<br>(0 92 to 1 30)       | 1 34<br>(1 13 to 1 55)       | 1 69<br>(1 40 to 1 98)       | 1 86<br>(1 51 to 2 21)       | 1 83<br>(1 50 to 2 18)       | 1 60<br>(1 25 to 2 00)       | 1 36<br>(0 97 to 1 85)       | 0 97<br>(0 63 to 1 48)       |
| Eritrea                          | 10 51<br>(8 90 to 12 33)     | 10 74<br>(9 26 to 12 18)     | 11 05<br>(9 77 to 12 38)     | 11 22<br>(9 82 to 12 74)     | 10 72<br>(9 40 to 12 09)     | 7 67<br>(6 61 to 8 78)       | 6 41<br>(5 42 to 7 54)       | 6 58<br>(5 24 to 8 03)       | 6 38<br>(4 96 to 8 07)       | 4 73<br>(3 49 to 6 36)       |
| Ethiopia                         | 164 98<br>(144 68 to 185 42) | 186 03<br>(166 04 to 207 21) | 186 07<br>(168 41 to 203 31) | 187 15<br>(171 58 to 202 89) | 196 58<br>(180 66 to 213 43) | 196 68<br>(180 55 to 214 40) | 182 45<br>(167 18 to 197 95) | 153 85<br>(137 68 to 171 07) | 118 75<br>(100 98 to 140 10) | 81 04<br>(65 51 to 100 47)   |
| Kenya                            | 41 52<br>(40 55 to 42 54)    | 43 60<br>(42 60 to 44 63)    | 44 37<br>(43 15 to 45 49)    | 46 12<br>(45 04 to 47 24)    | 48 86<br>(47 53 to 50 18)    | 54 93<br>(53 50 to 56 53)    | 55 36<br>(53 90 to 56 99)    | 49 85<br>(48 50 to 51 38)    | 41 18<br>(39 51 to 42 83)    | 32 81<br>(31 19 to 34 73)    |
| Madagascar                       | 29 72<br>(25 88 to 34 32)    | 32 37<br>(28 49 to 36 73)    | 36 31<br>(32 09 to 40 85)    | 41 92<br>(37 09 to 47 21)    | 49 48<br>(36 45 to 44 58)    | 41 43<br>(37 06 to 46 08)    | 40 48<br>(35 60 to 45 54)    | 38 60<br>(33 46 to 43 78)    | 40 01<br>(33 25 to 46 96)    | 36 95<br>(29 06 to 47 55)    |
| Malawi                           | 45 20<br>(40 46 to 50 30)    | 44 06<br>(39 94 to 48 32)    | 42 69<br>(39 09 to 46 68)    | 43 97<br>(40 36 to 47 90)    | 51 82<br>(47 63 to 56 13)    | 43 97<br>(42 38 to 50 46)    | 46 08<br>(38 32 to 46 11)    | 42 08<br>(31 18 to 38 02)    | 34 65<br>(28 00 to 37 22)    | 26 19<br>(20 93 to 33 55)    |
| Mozambique                       | 56 74<br>(48 21 to 66 28)    | 59 51<br>(51 08 to 68 28)    | 65 96<br>(57 02 to 75 23)    | 78 55<br>(69 03 to 88 28)    | 61 94<br>(52 32 to 71 12)    | 66 17<br>(57 28 to 75 25)    | 64 19<br>(57 88 to 70 90)    | 59 79<br>(54 14 to 65 49)    | 55 38<br>(48 52 to 62 24)    | 44 83<br>(36 83 to 53 94)    |
| Rwanda                           | 24 04<br>(21 69 to 26 38)    | 28 04<br>(25 32 to 30 88)    | 28 95<br>(26 37 to 31 58)    | 27 58<br>(25 17 to 30 42)    | 29 30<br>(26 77 to 32 19)    | 27 21<br>(24 16 to 30 24)    | 25 71<br>(22 54 to 29 06)    | 20 53<br>(18 18 to 23 23)    | 13 93<br>(11 98 to 16 02)    | 10 63<br>(8 06 to 13 98)     |
| Somalia                          | 14 56<br>(10 07 to 19 84)    | 18 28<br>(13 93 to 23 62)    | 22 78<br>(17 45 to 29 00)    | 24 64<br>(18 60 to 30 90)    | 22 02<br>(15 93 to 28 79)    | 19 89<br>(13 92 to 26 27)    | 19 11<br>(13 99 to 24 69)    | 17 66<br>(13 38 to 22 53)    | 21 19<br>(16 54 to 26 74)    | 15 54<br>(10 60 to 21 32)    |
| South Sudan                      | 30 01<br>(22 48 to 39 50)    | 31 06<br>(23 62 to 39 52)    | 32 86<br>(26 57 to 40 06)    | 35 73<br>(30 29 to 41 50)    | 34 16<br>(28 75 to 39 63)    | 27 37<br>(23 35 to 31 46)    | 26 27<br>(22 81 to 29 42)    | 27 50<br>(23 69 to 31 81)    | 29 74<br>(24 37 to 36 01)    | 33 39<br>(25 30 to 43 62)    |
| Tanzania                         | 79 54<br>(71 63 to 87 56)    | 82 84<br>(75 26 to 90 17)    | 86 55<br>(77 98 to 95 07)    | 91 06<br>(82 59 to 99 58)    | 94 32<br>(85 07 to 103 51)   | 99 27<br>(89 90 to 108 23)   | 91 49<br>(84 61 to 98 92)    | 82 38<br>(74 60 to 90 52)    | 72 25<br>(61 39 to 83 60)    | 58 11<br>(46 29 to 71 18)    |
| Uganda                           | 56 98<br>(51 95 to 61 76)    | 61 92<br>(57 93 to 66 05)    | 70 52<br>(66 33 to 74 75)    | 75 92<br>(72 07 to 79 90)    | 81 28<br>(77 14 to 85 39)    | 84 37<br>(79 96 to 88 51)    | 82 25<br>(78 37 to 86 44)    | 79 45<br>(75 00 to 84 02)    | 73 11<br>(66 87 to 79 83)    | 58 04<br>(50 37 to 67 06)    |
| Zambia                           | 21 35<br>(18 68 to 24 31)    | 21 50<br>(19 14 to 23 89)    | 23 89<br>(21 51 to 26 65)    | 28 88<br>(26 19 to 32 07)    | 33 30<br>(29 61 to 37 21)    | 33 92<br>(30 68 to 37 59)    | 33 57<br>(29 99 to 37 21)    | 30 37<br>(26 67 to 33 89)    | 25 94<br>(21 97 to 30 41)    | 21 31<br>(16 84 to 26 74)    |
| Central Sub-Saharan Africa       | 156 93<br>(101 91 to 211 82) | 162 16<br>(105 92 to 218 96) | 168 21<br>(115 59 to 214 82) | 169 74<br>(116 71 to 215 21) | 193 11<br>(132 29 to 245 56) | 215 26<br>(146 54 to 276 48) | 230 64<br>(157 08 to 297 86) | 226 44<br>(167 76 to 281 42) | 220 61<br>(154 00 to 285 06) | 189 93<br>(129 71 to 261 84) |
| Angola                           | 32 27<br>(22 46 to 43 93)    | 34 82<br>(26 35 to 44 51)    | 39 20<br>(31 42 to 48 34)    | 44 33<br>(37 46 to 52 09)    | 51 30<br>(43 49 to 59 46)    | 51 55<br>(43 54 to 60 56)    | 54 71<br>(46 19 to 63 90)    | 51 48<br>(43 14 to 61 09)    | 46 06<br>(37 10 to 56 46)    | 32 49<br>(21 59 to 46 73)    |
| Central African Republic         | 6 45<br>(5 24 to 7 82)       | 7 13<br>(5 90 to 8 48)       | 7 61<br>(6 42 to 8 92)       | 8 81<br>(7 42 to 10 23)      | 9 86<br>(8 47 to 11 49)      | 11 07<br>(9 21 to 13 03)     | 12 48<br>(10 46 to 14 92)    | 12 64<br>(10 25 to 15 39)    | 12 70<br>(9 98 to 15 76)     | 12 22<br>(8 93 to 16 74)     |
| Congo                            | 4 74<br>(3 34 to 6 66)       | 4 63<br>(3 36 to 6 34)       | 4 41<br>(3 49 to 5 53)       | 4 14<br>(3 48 to 4 85)       | 4 55<br>(3 81 to 5 45)       | 5 44<br>(4 49 to 6 55)       | 6 06<br>(5 21 to 7 94)       | 6 06<br>(5 07 to 7 12)       | 5 50<br>(4 21 to 7 13)       | 4 67<br>(3 00 to 7 06)       |
| Democratic Republic of the Congo | 109 60<br>(54 85 to 167 59)  | 112 68<br>(57 82 to 166 74)  | 114 67<br>(62 01 to 160 40)  | 109 78<br>(58 88 to 155 24)  | 124 27<br>(64 76 to 175 98)  | 143 90<br>(75 13 to 205 39)  | 154 16<br>(85 49 to 217 67)  | 153 59<br>(95 08 to 208 27)  | 153 89<br>(87 97 to 217 46)  | 138 52<br>(80 43 to 206 68)  |
| Equatorial Guinea                | 1 54<br>(1 09 to 2 05)       | 1 00<br>(0 76 to 1 28)       | 0 73<br>(0 58 to 0 91)       | 1 23<br>(0 96 to 1 53)       | 1 67<br>(1 31 to 2 10)       | 1 84<br>(1 46 to 2 26)       | 1 30<br>(1 01 to 1 65)       | 1 04<br>(0 74 to 1 40)       | 0 91<br>(0 61 to 1 30)       | 0 70<br>(0 45 to 1 07)       |
| Gabon                            | 2 31<br>(1 62 to 3 09)       | 1 90<br>(1 42 to 2 45)       | 1 59<br>(1 17 to 2 05)       | 1 46<br>(1 06 to 1 88)       | 1 46<br>(1 04 to 1 88)       | 1 46<br>(1 08 to 1 86)       | 1 53<br>(1 21 to 1 85)       | 1 63<br>(1 24 to 2 05)       | 1 54<br>(1 17 to 2 01)       | 1 33<br>(0 94 to 1 81)       |

Appendix Table 12C. Under-5 death numbers by location, females, 1970, 1975, 1980, 1985, 1990, 1995, 2000, 2005, 2010, 2016

| Location                  | 1970                               | 1975                               | 1980                               | 1985                               | 1990                               | 1995                               | 2000                               | 2005                               | 2010                               | 2016                               |
|---------------------------|------------------------------------|------------------------------------|------------------------------------|------------------------------------|------------------------------------|------------------------------------|------------------------------------|------------------------------------|------------------------------------|------------------------------------|
| Global                    | 7,639.63<br>(7,490.57 to 7,794.95) | 6,817.15<br>(6,691.58 to 6,958.54) | 6,243.46<br>(6,123.84 to 6,366.19) | 5,780.29<br>(5,666.79 to 5,890.19) | 5,188.36<br>(5,082.69 to 5,286.98) | 4,628.79<br>(4,528.49 to 4,728.72) | 4,085.55<br>(3,984.29 to 4,180.50) | 3,571.53<br>(3,480.37 to 3,661.37) | 3,073.77<br>(2,975.73 to 3,171.71) | 2,291.72<br>(2,190.04 to 2,398.66) |
| High SDI                  | 653.72<br>(609.51 to 702.00)       | 520.66<br>(488.55 to 551.75)       | 433.56<br>(404.68 to 462.53)       | 355.64<br>(333.71 to 378.24)       | 276.52<br>(260.77 to 293.33)       | 200.93<br>(189.40 to 214.15)       | 148.64<br>(139.39 to 160.30)       | 114.01<br>(103.05 to 129.70)       | 93.03<br>(82.46 to 108.31)         | 70.27<br>(61.60 to 84.32)          |
| High-middle SDI           | 152.49<br>(148.82 to 156.69)       | 107.94<br>(104.95 to 111.34)       | 82.50<br>(80.11 to 85.33)          | 62.86<br>(61.53 to 64.47)          | 53.26<br>(52.38 to 54.47)          | 40.77<br>(40.19 to 41.38)          | 33.55<br>(33.36 to 33.74)          | 30.02<br>(29.84 to 30.20)          | 26.44<br>(26.28 to 26.60)          | 23.54<br>(22.90 to 24.29)          |
| Middle SDI                | 3,020.42<br>(2,926.42 to 3,118.74) | 2,852.49<br>(2,759.21 to 2,950.19) | 2,753.74<br>(2,666.62 to 2,833.56) | 2,653.13<br>(2,567.99 to 2,729.47) | 2,436.83<br>(2,365.89 to 2,507.58) | 2,241.16<br>(2,161.80 to 2,315.69) | 2,005.32<br>(1,932.31 to 2,074.42) | 1,759.12<br>(1,694.78 to 1,828.58) | 1,496.70<br>(1,424.41 to 1,573.17) | 1,058.34<br>(987.46 to 1,134.00)   |
| Low-middle SDI            | 1,134.12<br>(1,066.83 to 1,196.44) | 1,179.91<br>(1,113.80 to 1,241.66) | 1,214.84<br>(1,149.84 to 1,278.31) | 1,233.15<br>(1,169.97 to 1,301.70) | 1,227.20<br>(1,163.08 to 1,287.04) | 1,247.07<br>(1,174.60 to 1,310.84) | 1,231.80<br>(1,162.79 to 1,293.93) | 1,154.34<br>(1,099.17 to 1,209.66) | 1,066.65<br>(1,002.27 to 1,130.48) | 875.47<br>(814.28 to 942.02)       |
| Low SDI                   | 2,675.04<br>(2,592.34 to 2,759.81) | 2,153.22<br>(2,091.56 to 2,215.79) | 1,756.21<br>(1,701.98 to 1,811.38) | 1,473.09<br>(1,432.25 to 1,511.51) | 1,192.26<br>(1,159.66 to 1,225.16) | 896.86<br>(874.21 to 919.42)       | 664.50<br>(648.03 to 680.60)       | 512.42<br>(498.18 to 526.51)       | 389.63<br>(376.29 to 402.70)       | 263.08<br>(248.88 to 278.76)       |
| High-income               | 178.44<br>(174.69 to 182.70)       | 128.15<br>(125.08 to 131.57)       | 91.95<br>(89.58 to 94.83)          | 68.57<br>(67.21 to 70.12)          | 59.85<br>(58.91 to 61.12)          | 46.00<br>(45.41 to 46.61)          | 39.04<br>(38.60 to 39.47)          | 35.07<br>(34.69 to 35.44)          | 31.19<br>(30.88 to 31.51)          | 27.70<br>(26.89 to 28.50)          |
| High-income North America | 40.41<br>(39.90 to 40.94)          | 28.30<br>(27.98 to 28.62)          | 25.43<br>(25.26 to 25.59)          | 22.07<br>(21.94 to 22.22)          | 21.26<br>(21.11 to 21.42)          | 17.00<br>(16.88 to 17.12)          | 15.55<br>(15.32 to 15.53)          | 14.66<br>(14.53 to 15.67)          | 13.66<br>(13.57 to 13.76)          | 13.11<br>(12.82 to 13.40)          |
| Canada                    | 3.49<br>(3.39 to 3.58)             | 2.59<br>(2.51 to 2.66)             | 1.96<br>(1.90 to 2.02)             | 1.58<br>(1.53 to 1.63)             | 1.43<br>(1.38 to 1.48)             | 1.19<br>(1.15 to 1.23)             | 0.91<br>(0.88 to 0.93)             | 0.91<br>(0.89 to 0.97)             | 0.96<br>(0.92 to 0.99)             | 0.96<br>(0.83 to 1.11)             |
| Greenland                 | 0.03<br>(0.03 to 0.03)             | 0.02<br>(0.02 to 0.02)             | 0.02<br>(0.02 to 0.02)             | 0.02<br>(0.01 to 0.02)             | 0.02<br>(0.02 to 0.02)             | 0.01<br>(0.01 to 0.01)             | 0.01<br>(0.01 to 0.01)             | 0.01<br>(0.01 to 0.01)             | 0.01<br>(0.01 to 0.01)             | <0.01<br>(0.01 to 0.01)            |
| United States             | 36.87<br>(36.36 to 37.39)          | 25.68<br>(25.36 to 25.99)          | 23.44<br>(23.28 to 23.59)          | 20.47<br>(20.34 to 20.59)          | 19.80<br>(19.66 to 19.96)          | 15.79<br>(15.68 to 15.91)          | 14.61<br>(14.40 to 14.61)          | 14.50<br>(14.50 to 14.72)          | 12.70<br>(12.61 to 12.79)          | 12.14<br>(11.88 to 12.39)          |
| Australasia               | 2.93<br>(2.87 to 2.99)             | 2.18<br>(2.14 to 2.23)             | 1.59<br>(1.55 to 1.62)             | 1.48<br>(1.44 to 1.52)             | 1.29<br>(1.25 to 1.32)             | 0.98<br>(0.96 to 1.01)             | 0.86<br>(0.84 to 0.89)             | 0.82<br>(0.79 to 0.84)             | 0.79<br>(0.77 to 0.82)             | 0.65<br>(0.59 to 0.72)             |
| Australia                 | 2.38<br>(2.32 to 2.44)             | 1.74<br>(1.70 to 1.79)             | 1.26<br>(1.22 to 1.29)             | 1.18<br>(1.15 to 1.22)             | 1.02<br>(0.99 to 1.05)             | 0.77<br>(0.75 to 0.79)             | 0.68<br>(0.66 to 0.70)             | 0.65<br>(0.63 to 0.67)             | 0.62<br>(0.60 to 0.64)             | 0.51<br>(0.45 to 0.58)             |
| New Zealand               | 0.55<br>(0.53 to 0.57)             | 0.44<br>(0.43 to 0.46)             | 0.33<br>(0.32 to 0.35)             | 0.30<br>(0.29 to 0.31)             | 0.27<br>(0.26 to 0.28)             | 0.21<br>(0.20 to 0.22)             | 0.18<br>(0.18 to 0.19)             | 0.17<br>(0.16 to 0.17)             | 0.17<br>(0.16 to 0.18)             | 0.14<br>(0.12 to 0.16)             |
| High-income Asia Pacific  | 39.97<br>(36.30 to 44.15)          | 27.20<br>(24.21 to 30.51)          | 17.13<br>(14.88 to 19.91)          | 10.25<br>(8.95 to 11.80)           | 7.23<br>(6.36 to 8.43)             | 4.29<br>(3.52 to 6.32)             | 2.49<br>(2.09 to 4.37)             | 2.48<br>(2.99 to 3.10)             | 2.48<br>(2.43 to 2.53)             | 1.87<br>(1.70 to 2.06)             |
| Brunei                    | 0.11<br>(0.11 to 0.12)             | 0.08<br>(0.08 to 0.09)             | 0.06<br>(0.05 to 0.06)             | 0.04<br>(0.04 to 0.04)             | 0.03<br>(0.03 to 0.04)             | 0.03<br>(0.03 to 0.03)             | 0.03<br>(0.03 to 0.03)             | 0.03<br>(0.03 to 0.03)             | 0.03<br>(0.02 to 0.03)             | 0.03<br>(0.02 to 0.03)             |
| Japan                     | 14.08<br>(13.70 to 14.45)          | 10.89<br>(10.62 to 11.15)          | 6.96<br>(6.89 to 7.04)             | 4.77<br>(4.71 to 4.83)             | 3.52<br>(3.48 to 3.57)             | 3.15<br>(3.06 to 3.25)             | 2.39<br>(2.36 to 2.43)             | 1.87<br>(1.84 to 1.91)             | 1.56<br>(1.54 to 1.59)             | 1.17<br>(1.12 to 1.21)             |
| Singapore                 | 0.54<br>(0.52 to 0.56)             | 0.33<br>(0.31 to 0.34)             | 0.25<br>(0.24 to 0.26)             | 0.19<br>(0.18 to 0.20)             | 0.15<br>(0.15 to 0.16)             | 0.11<br>(0.10 to 0.11)             | 0.07<br>(0.07 to 0.08)             | 0.05<br>(0.04 to 0.05)             | 0.04<br>(0.04 to 0.04)             | 0.03<br>(0.03 to 0.04)             |
| South Korea               | 25.24<br>(21.61 to 29.50)          | 15.91<br>(12.95 to 19.18)          | 9.86<br>(7.60 to 12.65)            | 5.25<br>(3.96 to 6.80)             | 3.52<br>(2.65 to 4.73)             | 2.46<br>(1.95 to 3.03)             | 1.79<br>(1.72 to 1.86)             | 1.10<br>(1.05 to 1.15)             | 0.85<br>(0.81 to 0.89)             | 0.65<br>(0.49 to 0.83)             |
| Western Europe            | 65.43<br>(64.88 to 65.97)          | 44.51<br>(44.15 to 44.86)          | 30.45<br>(30.18 to 30.72)          | 21.82<br>(21.64 to 22.02)          | 18.18<br>(18.01 to 18.35)          | 12.87<br>(12.75 to 13.00)          | 10.78<br>(10.68 to 10.89)          | 9.32<br>(9.21 to 9.42)             | 8.55<br>(8.47 to 8.65)             | 7.16<br>(6.66 to 7.68)             |
| Austria                   | <0.01<br>(0.01 to 0.01)            | <0.01<br>(0.01 to 0.01)            | <0.01<br>(0.01 to 0.01)            | <0.01<br>(0.01 to 0.01)            | <0.01<br>(0.01 to 0.01)            | <0.01<br>(0.01 to 0.01)            | <0.01<br>(0.01 to 0.01)            | <0.01<br>(0.01 to 0.01)            | <0.01<br>(0.01 to 0.01)            | <0.01<br>(0.01 to 0.01)            |
| Belgium                   | 1.42<br>(1.36 to 1.46)             | 0.94<br>(0.90 to 0.97)             | 0.64<br>(0.61 to 0.67)             | 0.48<br>(0.46 to 0.50)             | 0.37<br>(0.35 to 0.39)             | 0.26<br>(0.25 to 0.28)             | 0.19<br>(0.18 to 0.20)             | 0.16<br>(0.16 to 0.17)             | 0.15<br>(0.14 to 0.16)             | 0.12<br>(0.09 to 0.15)             |
| Cyprus                    | 1.45<br>(1.43 to 1.48)             | 0.96<br>(0.94 to 0.98)             | 0.75<br>(0.73 to 0.77)             | 0.56<br>(0.55 to 0.58)             | 0.51<br>(0.50 to 0.52)             | 0.37<br>(0.36 to 0.38)             | 0.29<br>(0.28 to 0.29)             | 0.25<br>(0.24 to 0.26)             | 0.24<br>(0.23 to 0.25)             | 0.22<br>(0.18 to 0.26)             |
| Denmark                   | 0.23<br>(0.21 to 0.27)             | 0.14<br>(0.13 to 0.15)             | 0.10<br>(0.10 to 0.11)             | 0.08<br>(0.07 to 0.08)             | 0.07<br>(0.06 to 0.07)             | 0.05<br>(0.04 to 0.05)             | 0.03<br>(0.03 to 0.03)             | 0.02<br>(0.02 to 0.03)             | 0.02<br>(0.02 to 0.02)             | 0.01<br>(0.01 to 0.02)             |
| Finland                   | 0.50<br>(0.48 to 0.52)             | 0.35<br>(0.34 to 0.37)             | 0.24<br>(0.23 to 0.26)             | 0.22<br>(0.20 to 0.23)             | 0.24<br>(0.22 to 0.25)             | 0.20<br>(0.19 to 0.21)             | 0.16<br>(0.15 to 0.18)             | 0.14<br>(0.13 to 0.15)             | 0.12<br>(0.11 to 0.12)             | 0.11<br>(0.09 to 0.13)             |
| France                    | 0.44<br>(0.42 to 0.47)             | 0.35<br>(0.32 to 0.37)             | 0.24<br>(0.22 to 0.26)             | 0.20<br>(0.18 to 0.21)             | 0.19<br>(0.18 to 0.21)             | 0.14<br>(0.13 to 0.15)             | 0.10<br>(0.10 to 0.11)             | 0.10<br>(0.09 to 0.11)             | 0.08<br>(0.07 to 0.09)             | 0.06<br>(0.04 to 0.07)             |
| Germany                   | 6.60<br>(6.48 to 6.74)             | 5.20<br>(5.10 to 5.31)             | 4.10<br>(4.01 to 4.20)             | 3.23<br>(3.15 to 3.31)             | 2.82<br>(2.75 to 2.88)             | 1.89<br>(1.83 to 1.95)             | 1.77<br>(1.71 to 1.83)             | 1.48<br>(1.43 to 1.54)             | 1.45<br>(1.41 to 1.49)             | 1.32<br>(1.04 to 1.66)             |
| Greece                    | 11.63<br>(11.41 to 11.85)          | 7.33<br>(7.15 to 7.51)             | 5.42<br>(5.28 to 5.57)             | 3.85<br>(3.74 to 3.96)             | 3.30<br>(3.21 to 3.40)             | 2.18<br>(2.15 to 2.22)             | 1.78<br>(1.72 to 1.84)             | 1.44<br>(1.39 to 1.49)             | 1.23<br>(1.18 to 1.28)             | 1.11<br>(0.91 to 1.38)             |
| Iceland                   | 2.19<br>(2.14 to 2.25)             | 1.68<br>(1.64 to 1.72)             | 1.27<br>(1.23 to 1.30)             | 0.78<br>(0.75 to 0.81)             | 0.48<br>(0.46 to 0.50)             | 0.39<br>(0.38 to 0.41)             | 0.29<br>(0.28 to 0.30)             | 0.22<br>(0.21 to 0.23)             | 0.21<br>(0.20 to 0.22)             | 0.16<br>(0.13 to 0.20)             |
| Ireland                   | 0.03<br>(0.03 to 0.03)             | 0.02<br>(0.02 to 0.03)             | 0.02<br>(0.02 to 0.02)             | 0.01<br>(0.01 to 0.01)             | 0.01<br>(0.01 to 0.01)             | 0.01<br>(0.01 to 0.01)             | 0.01<br>(0.01 to 0.01)             | 0.01<br>(0.01 to 0.01)             | 0.01<br>(0.01 to 0.01)             | <0.01<br>(0.01 to 0.01)            |
| Israel                    | 0.63<br>(0.61 to 0.66)             | 0.58<br>(0.56 to 0.61)             | 0.44<br>(0.42 to 0.46)             | 0.29<br>(0.28 to 0.30)             | 0.21<br>(0.20 to 0.23)             | 0.16<br>(0.15 to 0.17)             | 0.17<br>(0.16 to 0.18)             | 0.14<br>(0.13 to 0.14)             | 0.14<br>(0.13 to 0.15)             | 0.11<br>(0.08 to 0.15)             |
| Italy                     | 1.05<br>(0.95 to 1.16)             | 1.16<br>(1.13 to 1.20)             | 0.78<br>(0.75 to 0.81)             | 0.65<br>(0.62 to 0.68)             | 0.55<br>(0.53 to 0.57)             | 0.45<br>(0.43 to 0.47)             | 0.37<br>(0.40 to 0.43)             | 0.37<br>(0.36 to 0.39)             | 0.34<br>(0.32 to 0.35)             | 0.28<br>(0.24 to 0.32)             |
| Luxembourg                | 13.12<br>(12.84 to 13.41)          | 8.36<br>(8.17 to 8.55)             | 4.65<br>(4.52 to 4.78)             | 3.00<br>(2.91 to 3.09)             | 2.31<br>(2.24 to 2.39)             | 1.74<br>(1.67 to 1.80)             | 1.29<br>(1.26 to 1.32)             | 1.06<br>(1.01 to 1.10)             | 0.98<br>(0.94 to 1.02)             | 0.70<br>(0.51 to 0.97)             |
| Malta                     | 0.04<br>(0.04 to 0.05)             | 0.03<br>(0.02 to 0.03)             | 0.02<br>(0.02 to 0.02)             | 0.02<br>(0.02 to 0.02)             | 0.02<br>(0.02 to 0.02)             | 0.01<br>(0.01 to 0.02)             | 0.01<br>(0.01 to 0.01)             | 0.01<br>(0.01 to 0.01)             | 0.01<br>(0.01 to 0.01)             | 0.01<br>(0.01 to 0.01)             |
| Netherlands               | 0.06<br>(0.06 to 0.07)             | 0.05<br>(0.05 to 0.05)             | 0.04<br>(0.04 to 0.04)             | 0.03<br>(0.03 to 0.04)             | 0.03<br>(0.02 to 0.03)             | 0.02<br>(0.02 to 0.02)             | 0.02<br>(0.01 to 0.02)             | 0.01<br>(0.01 to 0.01)             | 0.01<br>(0.01 to 0.01)             | 0.01<br>(0.01 to 0.01)             |
| Norway                    | 1.59<br>(1.54 to 1.65)             | 1.04<br>(1.01 to 1.08)             | 0.81<br>(0.79 to 0.85)             | 0.74<br>(0.71 to 0.77)             | 0.71<br>(0.68 to 0.74)             | 0.57<br>(0.54 to 0.59)             | 0.46<br>(0.53 to 0.58)             | 0.36<br>(0.44 to 0.48)             | 0.29<br>(0.34 to 0.37)             | 0.29<br>(0.24 to 0.36)             |
| Portugal                  | 0.44<br>(0.42 to 0.46)             | 0.31<br>(0.30 to 0.33)             | 0.21<br>(0.20 to 0.23)             | 0.22<br>(0.21 to 0.23)             | 0.21<br>(0.20 to 0.23)             | 0.14<br>(0.13 to 0.15)             | 0.12<br>(0.12 to 0.13)             | 0.10<br>(0.09 to 0.10)             | 0.08<br>(0.08 to 0.09)             | 0.07<br>(0.06 to 0.09)             |
| Spain                     | 5.31<br>(5.20 to 5.43)             | 3.33<br>(3.24 to 3.42)             | 1.95<br>(1.92 to 1.99)             | 1.17<br>(1.14 to 1.19)             | 0.71<br>(0.69 to 0.73)             | 0.45<br>(0.44 to 0.47)             | 0.35<br>(0.34 to 0.36)             | 0.23<br>(0.23 to 0.24)             | 0.16<br>(0.16 to 0.17)             | 0.11<br>(0.10 to 0.13)             |
| Sweden                    | 9.06<br>(8.85 to 9.29)             | 6.24<br>(6.08 to 6.39)             | 3.62<br>(3.53 to 3.73)             | 2.14<br>(2.07 to 2.21)             | 1.61<br>(1.55 to 1.67)             | 1.10<br>(1.05 to 1.14)             | 0.92<br>(0.89 to 0.96)             | 0.92<br>(0.89 to 0.97)             | 0.84<br>(0.81 to 0.88)             | 0.62<br>(0.47 to 0.81)             |
| Stockholm                 | 0.62<br>(0.57 to 0.66)             | 0.45<br>(0.42 to 0.48)             | 0.33<br>(0.31 to 0.35)             | 0.30<br>(0.28 to 0.32)             | 0.36<br>(0.34 to 0.38)             | 0.21<br>(0.20 to 0.22)             | 0.15<br>(0.14 to 0.16)             | 0.15<br>(0.14 to 0.16)             | 0.13<br>(0.14 to 0.16)             | 0.13<br>(0.11 to 0.17)             |
| Sweden except Stockholm   | 0.09<br>(0.07 to 0.12)             | 0.07<br>(0.05 to 0.09)             | 0.05<br>(0.05 to 0.06)             | 0.05<br>(0.04 to 0.05)             | 0.05<br>(0.05 to 0.07)             | 0.04<br>(0.03 to 0.04)             | 0.04<br>(0.03 to 0.03)             | 0.03<br>(0.03 to 0.03)             | 0.03<br>(0.02 to 0.03)             | 0.03<br>(0.02 to 0.04)             |
| Switzerland               | 0.53<br>(0.49 to 0.56)             | 0.38<br>(0.36 to 0.41)             | 0.28<br>(0.26 to 0.30)             | 0.25<br>(0.24 to 0.27)             | 0.30<br>(0.28 to 0.31)             | 0.17<br>(0.16 to 0.18)             | 0.12<br>(0.11 to 0.13)             | 0.12<br>(0.11 to 0.13)             | 0.12<br>(0.12 to 0.14)             | 0.11<br>(0.08 to 0.14)             |
| United Kingdom            | 0.76<br>(0.73 to 0.79)             | 0.45<br>(0.43 to 0.47)             | 0.32<br>(0.31 to 0.34)             | 0.28<br>(0.27 to 0.29)             | 0.30<br>(0.28 to 0.31)             | 0.22<br>(0.21 to 0.23)             | 0.19<br>(0.18 to 0.20)             | 0.16<br>(0.15 to 0.17)             | 0.15<br>(0.15 to 0.17)             | 0.15<br>(0.12 to 0.19)             |
| England                   | 8.19<br>(8.00 to 8.38)             | 4.45<br>(5.37 to 5.62)             | 4.45<br>(4.39 to 4.51)             | 3.56<br>(3.52 to 3.60)             | 3.16<br>(3.12 to 3.19)             | 2.31<br>(2.28 to 2.34)             | 1.95<br>(1.92 to 1.97)             | 1.88<br>(1.86 to 1.90)             | 1.80<br>(1.78 to 1.83)             | 1.55<br>(1.51 to 1.60)             |
| East Midlands             | 6.51<br>(6.38 to 6.63)             | 4.36<br>(4.27 to 4.45)             | 3.59<br>(3.54 to 3.65)             | 2.92<br>(2.89 to 2.95)             | 2.66<br>(2.63 to 2.69)             | 1.93<br>(1.91 to 1.95)             | 1.65<br>(1.63 to 1.67)             | 1.65<br>(1.58 to 1.62)             | 1.55<br>(1.53 to 1.57)             | 1.34<br>(1.32 to 1.37)             |
| East of England           | 0.49<br>(0.47 to 0.52)             | 0.34<br>(0.33 to 0.36)             | 0.29<br>(0.27 to 0.30)             | 0.22<br>(0.21 to 0.23)             | 0.21<br>(0.20 to 0.22)             | 0.15<br>(0.14 to 0.16)             | 0.13<br>(0.12 to 0.13)             | 0.13<br>(0.12 to 0.13)             | 0.12<br>(0.12 to 0.13)             | 0.12<br>(0.11 to 0.12)             |
| Greater London            | 0.54<br>(0.50 to 0.58)             | 0.37<br>(0.34 to 0.41)             | 0.31<br>(0.29 to 0.33)             | 0.26<br>(0.25 to 0.27)             | 0.21<br>(0.20 to 0.22)             | 0.17<br>(0.16 to 0.18)             |                                    |                                    |                                    |                                    |

Appendix Table 12C. Under-5 death numbers by location, females, 1970, 1975, 1980, 1985, 1990, 1995, 2000, 2005, 2010, 2016

| Location                                         | 1970                         | 1975                         | 1980                         | 1985                         | 1990                         | 1995                         | 2000                         | 2005                         | 2010                         | 2016                      |
|--------------------------------------------------|------------------------------|------------------------------|------------------------------|------------------------------|------------------------------|------------------------------|------------------------------|------------------------------|------------------------------|---------------------------|
| Yorkshire and the Humber                         | 0.76<br>(0.72 to 0.79)       | 0.50<br>(0.48 to 0.53)       | 0.41<br>(0.40 to 0.43)       | 0.33<br>(0.32 to 0.34)       | 0.30<br>(0.29 to 0.30)       | 0.23<br>(0.22 to 0.23)       | 0.20<br>(0.19 to 0.20)       | 0.19<br>(0.19 to 0.20)       | 0.17<br>(0.17 to 0.18)       | 0.15<br>(0.15 to 0.16)    |
| Northern Ireland                                 | 0.36<br>(0.33 to 0.39)       | 0.27<br>(0.25 to 0.28)       | 0.20<br>(0.19 to 0.22)       | 0.15<br>(0.14 to 0.16)       | 0.11<br>(0.10 to 0.12)       | 0.08<br>(0.08 to 0.09)       | 0.06<br>(0.06 to 0.07)       | 0.06<br>(0.06 to 0.07)       | 0.07<br>(0.06 to 0.07)       | 0.05<br>(0.05 to 0.06)    |
| Scotland                                         | 0.85<br>(0.82 to 0.88)       | 0.57<br>(0.55 to 0.59)       | 0.41<br>(0.39 to 0.43)       | 0.32<br>(0.30 to 0.34)       | 0.26<br>(0.24 to 0.27)       | 0.19<br>(0.18 to 0.20)       | 0.15<br>(0.14 to 0.16)       | 0.14<br>(0.13 to 0.15)       | 0.12<br>(0.11 to 0.12)       | 0.10<br>(0.08 to 0.14)    |
| Wales                                            | 0.46<br>(0.35 to 0.61)       | 0.30<br>(0.23 to 0.40)       | 0.24<br>(0.21 to 0.28)       | 0.18<br>(0.16 to 0.19)       | 0.13<br>(0.10 to 0.14)       | 0.10<br>(0.10 to 0.11)       | 0.08<br>(0.08 to 0.09)       | 0.07<br>(0.07 to 0.08)       | 0.07<br>(0.07 to 0.08)       | 0.06<br>(0.05 to 0.08)    |
| Southern Latin America                           | 29.70<br>(29.29 to 30.08)    | 25.95<br>(25.44 to 26.53)    | 17.36<br>(17.16 to 17.56)    | 12.95<br>(12.80 to 13.10)    | 11.89<br>(11.76 to 12.04)    | 9.40<br>(9.28 to 9.53)       | 7.69<br>(7.27 to 8.11)       | 6.34<br>(6.02 to 6.67)       | 5.71<br>(5.43 to 5.99)       | 4.90<br>(4.38 to 5.48)    |
| Argentina                                        | 17.55<br>(17.23 to 17.88)    | 16.95<br>(16.43 to 17.51)    | 12.29<br>(12.12 to 12.46)    | 9.43<br>(9.30 to 9.57)       | 8.80<br>(8.67 to 8.93)       | 7.16<br>(7.05 to 7.28)       | 6.08<br>(5.68 to 6.49)       | 5.06<br>(4.75 to 5.39)       | 4.50<br>(4.23 to 4.77)       | 3.88<br>(3.39 to 4.42)    |
| Chile                                            | 10.79<br>(10.57 to 11.00)    | 7.60<br>(7.44 to 7.77)       | 4.10<br>(4.00 to 4.19)       | 2.75<br>(2.68 to 2.82)       | 2.54<br>(2.49 to 2.60)       | 1.72<br>(1.68 to 1.75)       | 1.24<br>(1.21 to 1.27)       | 0.99<br>(0.96 to 1.02)       | 0.99<br>(0.91 to 1.07)       | 0.85<br>(0.72 to 1.01)    |
| Uruguay                                          | 1.36<br>(1.31 to 1.40)       | 1.40<br>(1.36 to 1.45)       | 0.97<br>(0.94 to 1.01)       | 0.76<br>(0.73 to 0.79)       | 0.55<br>(0.53 to 0.58)       | 0.52<br>(0.48 to 0.57)       | 0.37<br>(0.34 to 0.39)       | 0.29<br>(0.27 to 0.32)       | 0.21<br>(0.18 to 0.25)       | 0.18<br>(0.12 to 0.26)    |
| Central Europe, Eastern Europe, and Central Asia | 146.64<br>(137.30 to 156.64) | 132.74<br>(126.31 to 139.21) | 123.14<br>(118.30 to 128.49) | 117.34<br>(113.27 to 121.60) | 94.26<br>(90.93 to 97.86)    | 74.36<br>(71.36 to 77.70)    | 54.14<br>(51.43 to 56.97)    | 44.67<br>(41.26 to 48.54)    | 39.40<br>(35.22 to 44.56)    | 32.82<br>(28.48 to 38.54) |
| Eastern Europe                                   | 40.74<br>(36.39 to 46.35)    | 42.39<br>(38.84 to 46.86)    | 40.51<br>(38.04 to 43.53)    | 38.32<br>(36.78 to 40.26)    | 26.81<br>(25.66 to 28.09)    | 20.01<br>(19.04 to 21.05)    | 15.55<br>(14.72 to 16.59)    | 12.15<br>(11.42 to 13.00)    | 10.39<br>(9.71 to 11.22)     | 9.23<br>(8.26 to 10.45)   |
| Belarus                                          | 2.24<br>(1.80 to 2.76)       | 1.85<br>(1.50 to 2.22)       | 1.68<br>(1.38 to 2.03)       | 1.65<br>(1.38 to 1.97)       | 1.23<br>(1.02 to 1.48)       | 0.82<br>(0.68 to 0.98)       | 0.62<br>(0.50 to 0.75)       | 0.45<br>(0.36 to 0.55)       | 0.36<br>(0.28 to 0.45)       | 0.26<br>(0.20 to 0.35)    |
| Estonia                                          | 0.19<br>(0.18 to 0.20)       | 0.19<br>(0.18 to 0.20)       | 0.20<br>(0.19 to 0.22)       | 0.20<br>(0.18 to 0.21)       | 0.15<br>(0.14 to 0.16)       | 0.11<br>(0.10 to 0.12)       | 0.06<br>(0.05 to 0.07)       | 0.04<br>(0.04 to 0.05)       | 0.03<br>(0.03 to 0.04)       | 0.02<br>(0.01 to 0.03)    |
| Latvia                                           | 0.31<br>(0.29 to 0.33)       | 0.36<br>(0.34 to 0.39)       | 0.31<br>(0.29 to 0.33)       | 0.29<br>(0.27 to 0.32)       | 0.28<br>(0.26 to 0.30)       | 0.20<br>(0.19 to 0.22)       | 0.11<br>(0.11 to 0.12)       | 0.09<br>(0.08 to 0.10)       | 0.07<br>(0.06 to 0.08)       | 0.05<br>(0.03 to 0.07)    |
| Lithuania                                        | 0.55<br>(0.52 to 0.57)       | 0.53<br>(0.50 to 0.56)       | 0.41<br>(0.39 to 0.43)       | 0.46<br>(0.44 to 0.48)       | 0.33<br>(0.31 to 0.35)       | 0.28<br>(0.27 to 0.30)       | 0.16<br>(0.15 to 0.17)       | 0.11<br>(0.10 to 0.12)       | 0.08<br>(0.08 to 0.09)       | 0.06<br>(0.05 to 0.07)    |
| Moldova                                          | 2.34<br>(1.53 to 3.39)       | 2.16<br>(1.45 to 3.05)       | 2.06<br>(1.62 to 2.56)       | 1.70<br>(1.39 to 2.04)       | 1.10<br>(0.90 to 1.32)       | 0.87<br>(0.73 to 1.05)       | 0.58<br>(0.47 to 0.71)       | 0.32<br>(0.24 to 0.41)       | 0.22<br>(0.23 to 0.40)       | 0.22<br>(0.15 to 0.32)    |
| Russia                                           | 22.58<br>(22.28 to 22.91)    | 26.13<br>(25.76 to 26.49)    | 25.75<br>(25.36 to 26.15)    | 26.24<br>(25.82 to 26.64)    | 18.02<br>(17.78 to 18.27)    | 13.30<br>(13.06 to 13.54)    | 10.59<br>(10.33 to 10.86)    | 8.35<br>(8.21 to 8.50)       | 7.16<br>(7.05 to 7.29)       | 6.74<br>(6.26 to 7.28)    |
| Ukraine                                          | 12.55<br>(8.08 to 18.25)     | 11.17<br>(7.66 to 15.57)     | 10.08<br>(7.66 to 12.98)     | 7.78<br>(6.28 to 9.66)       | 7.78<br>(6.28 to 9.66)       | 4.42<br>(4.63 to 6.97)       | 2.78<br>(3.52 to 5.46)       | 2.38<br>(2.65 to 4.38)       | 2.38<br>(2.10 to 3.62)       | 2.38<br>(1.75 to 3.16)    |
| Central Europe                                   | 37.36<br>(35.43 to 39.73)    | 31.37<br>(29.82 to 33.22)    | 25.45<br>(24.40 to 26.74)    | 20.76<br>(20.03 to 21.54)    | 16.19<br>(15.74 to 16.64)    | 11.19<br>(10.92 to 11.45)    | 7.06<br>(6.87 to 7.27)       | 5.26<br>(5.10 to 5.42)       | 4.02<br>(3.90 to 4.15)       | 2.96<br>(2.57 to 3.12)    |
| Albania                                          | 3.05<br>(1.81 to 4.84)       | 2.38<br>(1.45 to 3.65)       | 2.07<br>(1.47 to 2.83)       | 1.59<br>(1.66 to 2.45)       | 1.21<br>(1.32 to 1.89)       | 0.64<br>(1.01 to 1.42)       | 0.37<br>(0.52 to 0.78)       | 0.26<br>(0.29 to 0.48)       | 0.26<br>(0.18 to 0.37)       | 0.23<br>(0.14 to 0.35)    |
| Bosnia and Herzegovina                           | 2.02<br>(1.47 to 2.78)       | 1.44<br>(1.08 to 1.89)       | 1.02<br>(0.82 to 1.28)       | 0.82<br>(0.78 to 0.87)       | 0.50<br>(0.48 to 0.52)       | 0.54<br>(0.48 to 0.61)       | 0.16<br>(0.15 to 0.17)       | 0.12<br>(0.11 to 0.13)       | 0.10<br>(0.09 to 0.11)       | 0.07<br>(0.06 to 0.08)    |
| Bulgaria                                         | 1.89<br>(1.83 to 1.95)       | 1.70<br>(1.64 to 1.76)       | 1.35<br>(1.30 to 1.39)       | 0.98<br>(0.94 to 1.02)       | 0.83<br>(0.80 to 0.87)       | 0.59<br>(0.56 to 0.61)       | 0.50<br>(0.47 to 0.53)       | 0.38<br>(0.36 to 0.41)       | 0.35<br>(0.33 to 0.37)       | 0.23<br>(0.14 to 0.35)    |
| Croatia                                          | 1.00<br>(0.71 to 1.35)       | 0.79<br>(0.59 to 1.02)       | 0.64<br>(0.53 to 0.77)       | 0.49<br>(0.46 to 0.52)       | 0.30<br>(0.28 to 0.31)       | 0.26<br>(0.23 to 0.29)       | 0.16<br>(0.15 to 0.17)       | 0.12<br>(0.11 to 0.13)       | 0.10<br>(0.09 to 0.11)       | 0.07<br>(0.06 to 0.09)    |
| Czech Republic                                   | 1.45<br>(1.40 to 1.50)       | 1.69<br>(1.64 to 1.74)       | 1.20<br>(1.15 to 1.25)       | 0.81<br>(0.77 to 0.84)       | 0.64<br>(0.61 to 0.68)       | 0.36<br>(0.35 to 0.39)       | 0.20<br>(0.19 to 0.22)       | 0.18<br>(0.17 to 0.19)       | 0.17<br>(0.15 to 0.18)       | 0.13<br>(0.10 to 0.17)    |
| Hungary                                          | 2.61<br>(2.52 to 2.71)       | 2.96<br>(2.85 to 3.07)       | 1.61<br>(1.55 to 1.67)       | 1.26<br>(1.21 to 1.31)       | 0.93<br>(0.89 to 0.98)       | 0.60<br>(0.57 to 0.64)       | 0.44<br>(0.42 to 0.47)       | 0.32<br>(0.29 to 0.34)       | 0.25<br>(0.23 to 0.27)       | 0.22<br>(0.16 to 0.28)    |
| Macedonia                                        | 1.37<br>(0.76 to 2.28)       | 1.08<br>(0.58 to 1.81)       | 1.01<br>(0.70 to 1.42)       | 0.75<br>(0.54 to 1.02)       | 0.56<br>(0.54 to 0.59)       | 0.34<br>(0.32 to 0.36)       | 0.18<br>(0.16 to 0.19)       | 0.14<br>(0.13 to 0.15)       | 0.10<br>(0.09 to 0.11)       | 0.10<br>(0.06 to 0.15)    |
| Montenegro                                       | 0.16<br>(0.11 to 0.23)       | 0.13<br>(0.09 to 0.19)       | 0.11<br>(0.07 to 0.16)       | 0.09<br>(0.06 to 0.13)       | 0.06<br>(0.05 to 0.08)       | 0.06<br>(0.05 to 0.07)       | 0.03<br>(0.05 to 0.06)       | 0.03<br>(0.03 to 0.04)       | 0.02<br>(0.02 to 0.02)       | 0.02<br>(0.01 to 0.02)    |
| Poland                                           | 8.59<br>(8.38 to 8.81)       | 7.58<br>(7.40 to 7.79)       | 6.96<br>(6.79 to 7.15)       | 5.96<br>(5.76 to 6.17)       | 4.26<br>(4.13 to 4.39)       | 2.93<br>(2.83 to 3.05)       | 1.56<br>(1.50 to 1.63)       | 1.20<br>(1.15 to 1.26)       | 1.05<br>(0.99 to 1.10)       | 0.75<br>(0.47 to 1.16)    |
| Romania                                          | 11.01<br>(10.79 to 11.23)    | 7.77<br>(7.61 to 7.92)       | 6.25<br>(6.12 to 6.39)       | 4.99<br>(4.87 to 5.11)       | 4.74<br>(4.63 to 4.85)       | 2.67<br>(2.59 to 2.76)       | 2.22<br>(2.15 to 2.29)       | 1.66<br>(1.59 to 1.74)       | 1.05<br>(1.00 to 1.09)       | 0.71<br>(0.58 to 0.88)    |
| Serbia                                           | 2.82<br>(1.87 to 4.06)       | 2.45<br>(1.67 to 3.52)       | 2.07<br>(1.43 to 2.86)       | 1.73<br>(1.25 to 2.30)       | 1.19<br>(0.92 to 1.52)       | 1.22<br>(1.18 to 1.26)       | 0.66<br>(0.54 to 0.79)       | 0.49<br>(0.41 to 0.59)       | 0.37<br>(0.35 to 0.39)       | 0.27<br>(0.22 to 0.32)    |
| Slovakia                                         | 1.04<br>(0.99 to 1.08)       | 1.12<br>(1.09 to 1.17)       | 0.94<br>(0.90 to 0.98)       | 0.70<br>(0.67 to 0.73)       | 0.49<br>(0.46 to 0.51)       | 0.34<br>(0.31 to 0.36)       | 0.23<br>(0.21 to 0.25)       | 0.20<br>(0.18 to 0.21)       | 0.18<br>(0.17 to 0.19)       | 0.15<br>(0.11 to 0.21)    |
| Slovenia                                         | 0.34<br>(0.25 to 0.46)       | 0.28<br>(0.22 to 0.36)       | 0.23<br>(0.19 to 0.26)       | 0.16<br>(0.15 to 0.17)       | 0.10<br>(0.09 to 0.10)       | 0.06<br>(0.05 to 0.06)       | 0.04<br>(0.04 to 0.04)       | 0.03<br>(0.03 to 0.04)       | 0.03<br>(0.03 to 0.03)       | 0.02<br>(0.02 to 0.03)    |
| Central Asia                                     | 68.54<br>(61.05 to 76.44)    | 58.98<br>(54.29 to 64.04)    | 57.18<br>(53.34 to 61.64)    | 58.26<br>(54.57 to 62.04)    | 51.26<br>(48.25 to 54.54)    | 43.17<br>(40.40 to 46.34)    | 31.53<br>(29.04 to 34.32)    | 27.27<br>(23.99 to 31.01)    | 25.00<br>(20.88 to 30.11)    | 20.63<br>(16.58 to 26.06) |
| Armenia                                          | 3.10<br>(2.15 to 4.36)       | 2.59<br>(1.98 to 3.35)       | 2.57<br>(2.17 to 3.06)       | 2.23<br>(1.91 to 2.59)       | 1.58<br>(1.37 to 1.83)       | 0.90<br>(0.77 to 1.05)       | 0.47<br>(0.39 to 0.56)       | 0.37<br>(0.28 to 0.47)       | 0.29<br>(0.22 to 0.36)       | 0.22<br>(0.16 to 0.30)    |
| Azerbaijan                                       | 8.82<br>(6.28 to 11.90)      | 6.50<br>(4.82 to 8.48)       | 6.68<br>(5.34 to 8.28)       | 7.18<br>(6.01 to 8.41)       | 6.53<br>(5.46 to 7.75)       | 5.31<br>(4.50 to 6.27)       | 3.38<br>(2.84 to 4.02)       | 3.19<br>(2.60 to 4.07)       | 2.43<br>(2.38 to 4.12)       | 2.43<br>(1.67 to 3.42)    |
| Georgia                                          | 4.07<br>(3.12 to 5.24)       | 3.18<br>(2.56 to 3.89)       | 2.40<br>(1.97 to 2.89)       | 1.99<br>(1.69 to 2.33)       | 1.64<br>(1.42 to 1.87)       | 1.11<br>(0.97 to 1.27)       | 0.66<br>(0.71 to 0.93)       | 0.57<br>(0.54 to 0.81)       | 0.57<br>(0.43 to 0.73)       | 0.42<br>(0.31 to 0.56)    |
| Kazakhstan                                       | 10.62<br>(7.79 to 13.79)     | 9.26<br>(7.69 to 11.11)      | 8.27<br>(7.02 to 9.58)       | 7.41<br>(6.51 to 8.41)       | 6.06<br>(5.30 to 6.79)       | 5.07<br>(4.28 to 5.93)       | 3.79<br>(3.11 to 4.59)       | 3.64<br>(2.87 to 4.52)       | 3.15<br>(2.50 to 3.90)       | 2.23<br>(1.64 to 2.95)    |
| Kyrgyzstan                                       | 5.95<br>(4.81 to 7.37)       | 4.87<br>(4.11 to 5.72)       | 4.49<br>(3.93 to 5.08)       | 4.49<br>(4.08 to 4.93)       | 3.75<br>(3.45 to 4.04)       | 2.77<br>(2.53 to 3.01)       | 2.18<br>(2.00 to 2.38)       | 1.95<br>(1.77 to 2.15)       | 2.12<br>(1.89 to 2.38)       | 1.90<br>(1.54 to 2.28)    |
| Mongolia                                         | 3.65<br>(2.88 to 4.48)       | 3.40<br>(2.75 to 4.07)       | 3.47<br>(2.87 to 4.12)       | 3.45<br>(2.99 to 3.94)       | 2.90<br>(2.56 to 3.23)       | 1.86<br>(1.64 to 2.08)       | 1.24<br>(1.09 to 1.39)       | 0.90<br>(0.78 to 1.03)       | 0.82<br>(0.69 to 0.96)       | 0.69<br>(0.53 to 0.88)    |
| Tajikistan                                       | 10.39<br>(7.90 to 13.57)     | 9.85<br>(8.08 to 11.82)      | 9.18<br>(7.65 to 10.87)      | 9.35<br>(8.05 to 10.65)      | 8.83<br>(7.51 to 10.30)      | 7.38<br>(6.28 to 8.60)       | 5.41<br>(4.44 to 6.65)       | 3.83<br>(3.15 to 4.64)       | 3.78<br>(2.94 to 4.80)       | 4.00<br>(2.42 to 6.17)    |
| Turkmenistan                                     | 5.57<br>(3.90 to 7.58)       | 5.00<br>(3.43 to 6.99)       | 4.82<br>(3.76 to 6.12)       | 5.04<br>(4.16 to 6.00)       | 4.54<br>(4.28 to 5.77)       | 4.54<br>(3.83 to 5.38)       | 3.49<br>(2.63 to 4.56)       | 2.80<br>(1.94 to 3.78)       | 2.36<br>(1.55 to 3.30)       | 1.87<br>(1.24 to 2.76)    |
| Uzbekistan                                       | 16.38<br>(11.56 to 22.07)    | 14.32<br>(11.22 to 17.93)    | 15.28<br>(12.46 to 18.36)    | 17.10<br>(14.49 to 20.10)    | 14.98<br>(12.64 to 17.44)    | 14.23<br>(12.18 to 16.70)    | 10.75<br>(8.82 to 13.00)     | 9.84<br>(7.10 to 13.18)      | 8.72<br>(5.08 to 13.42)      | 6.88<br>(3.65 to 11.61)   |
| Latin America and Caribbean                      | 470.41<br>(458.59 to 483.42) | 427.19<br>(417.36 to 437.06) | 373.37<br>(364.46 to 382.60) | 315.92<br>(309.08 to 322.90) | 257.05<br>(251.06 to 263.71) | 205.93<br>(201.06 to 210.94) | 158.85<br>(153.69 to 164.35) | 128.35<br>(124.24 to 132.86) | 118.80<br>(107.14 to 131.62) | 80.94<br>(76.60 to 86.70) |
| Central Latin America                            | 180.88<br>(176.20 to 185.75) | 163.65<br>(159.52 to 167.98) | 138.24<br>(134.69 to 142.07) | 116.22<br>(113.28 to 119.40) | 97.30<br>(94.56 to 100.03)   | 81.81<br>(79.56 to 83.94)    | 65.10<br>(63.05 to 67.14)    | 52.45<br>(50.62 to 54.50)    | 42.91<br>(41.12 to 44.79)    | 32.96<br>(31.31 to 34.87) |
| Colombia                                         | 29.39<br>(26.68 to 32.50)    | 25.14<br>(22.84 to 27.42)    | 19.12<br>(17.13 to 21.11)    | 16.83<br>(15.12 to 18.72)    | 13.42<br>(11.67 to 15.28)    | 12.01<br>(10.74 to 13.29)    | 9.91<br>(8.88 to 11.01)      | 9.91<br>(7.61 to 9.91)       | 6.94<br>(5.83 to 8.22)       | 4.61<br>(3.75 to 5.75)    |
| Costa Rica                                       | 1.87<br>(1.74 to 2.02)       | 1.25<br>(1.15 to 1.36)       | 0.96<br>(0.85 to 1.06)       | 0.83<br>(0.73 to 0.94)       | 0.69<br>(0.60 to 0.79)       | 0.57<br>(0.47 to 0.69)       | 0.50<br>(0.41 to 0.61)       | 0.43<br>(0.35 to 0.52)       | 0.37<br>(0.28 to 0.48)       | 0.27<br>(0.18 to 0.40)    |
| El Salvador                                      | 9.68<br>(8.40 to 10.97)      | 8.49<br>(7.60 to 9.44)       | 6.94<br>(6.26 to 7.67)       | 5.21<br>(4.66 to 5.79)       | 3.66<br>(3.23 to 4.15)       | 2.70<br>(2.30 to 3.16)       | 1.89<br>(1.63 to 2.18)       | 1.21<br>(0.96 to 1.50)       | 0.82<br>(0.64 to 1.03)       | 0.54<br>(0.38 to 0.75)    |
| Guatemala                                        | 20.31<br>(18.31 to 22.55)    | 18.59<br>(16.70 to 20.61)    | 16.47<br>(14.83 to 18.21)    | 14.53<br>(13.15 to 15.94)    | 12.93<br>(11.86 to 14.08)    | 11.24<br>(10.31 to 12.17)    | 9.48<br>(8.52 to 10.45)      | 7.90<br>(7.05 to 8.74)       | 6.22<br>(5.51 to 7.06)       | 4.85<br>(4.06 to 5.74)    |
| Honduras                                         | 7.70<br>(6.95 to 8.48)       | 7.09<br>(6.47 to 7.74)       | 6.08<br>(5.47 to 6.68)       | 5.28<br>(4.76 to 5.81)       | 4.46<br>(3.93 to 4.98)       | 3.63<br>(3.06 to 4.17)       | 2.89<br>(2.43 to 3.35)       | 2.39<br>(2.05 to 2.76)       | 2.16<br>(1.84 to 2.55)       | 1.82<br>(1.44 to          |

Appendix Table 12C. Under-5 death numbers by location, females, 1970, 1975, 1980, 1985, 1990, 1995, 2000, 2005, 2010, 2016

| Location                               | 1970                               | 1975                               | 1980                               | 1985                               | 1990                         | 1995                         | 2000                         | 2005                         | 2010                         | 2016                         |
|----------------------------------------|------------------------------------|------------------------------------|------------------------------------|------------------------------------|------------------------------|------------------------------|------------------------------|------------------------------|------------------------------|------------------------------|
| Peru                                   | 44 20<br>(39.05 to 49.84)          | 36 68<br>(33.66 to 39.81)          | 34 22<br>(31.24 to 37.44)          | 29 55<br>(27.23 to 32.06)          | 23 01<br>(21.24 to 24.78)    | 16 14<br>(14.76 to 17.53)    | 10 07<br>(9.19 to 10.99)     | 7 27<br>(6.48 to 8.16)       | 6 02<br>(5.42 to 6.63)       | 5 11<br>(4.15 to 6.31)       |
| Caribbean                              | 45 04<br>(39.26 to 50.95)          | 39 41<br>(33.61 to 44.82)          | 35 34<br>(29.96 to 41.15)          | 31 62<br>(27.42 to 36.21)          | 28 04<br>(24.04 to 32.31)    | 23 80<br>(20.27 to 27.37)    | 19 70<br>(15.82 to 24.22)    | 18 51<br>(15.58 to 21.66)    | 29 90<br>(18.35 to 41.87)    | 12 17<br>(8.77 to 17.02)     |
| Antigua and Barbuda                    | 0 03<br>(0.02 to 0.03)             | 0 02<br>(0.01 to 0.03)             | 0 01<br>(0.01 to 0.02)             | 0 01<br>(0.01 to 0.01)             | 0 01<br>(-0.01 to 0.01)      | 0 01<br>(0.01 to 0.01)       | 0 01<br>(0.01 to 0.01)       | 0 01<br>(0.01 to 0.01)       | 0 01<br>(-0.01 to 0.01)      | 0 01<br>(-0.01 to 0.01)      |
| The Bahamas                            | 0 10<br>(0.07 to 0.15)             | 0 09<br>(0.06 to 0.12)             | 0 08<br>(0.05 to 0.12)             | 0 07<br>(0.04 to 0.11)             | 0 06<br>(0.03 to 0.10)       | 0 05<br>(0.03 to 0.07)       | 0 03<br>(0.02 to 0.05)       | 0 04<br>(0.03 to 0.05)       | 0 04<br>(0.02 to 0.06)       | 0 03<br>(0.02 to 0.08)       |
| Barbados                               | 0 11<br>(0.07 to 0.15)             | 0 07<br>(0.05 to 0.10)             | 0 05<br>(0.03 to 0.07)             | 0 04<br>(0.02 to 0.06)             | 0 03<br>(0.02 to 0.05)       | 0 03<br>(0.02 to 0.05)       | 0 03<br>(0.01 to 0.05)       | 0 03<br>(0.02 to 0.04)       | 0 02<br>(0.01 to 0.03)       | 0 02<br>(0.01 to 0.04)       |
| Belize                                 | 0 24<br>(0.19 to 0.30)             | 0 20<br>(0.16 to 0.24)             | 0 17<br>(0.14 to 0.21)             | 0 15<br>(0.13 to 0.18)             | 0 13<br>(0.11 to 0.16)       | 0 08<br>(0.07 to 0.11)       | 0 09<br>(0.07 to 0.12)       | 0 08<br>(0.06 to 0.12)       | 0 07<br>(0.05 to 0.10)       | 0 07<br>(0.03 to 0.12)       |
| Bermuda                                | 0 01<br>(0.01 to 0.02)             | 0 01<br>(0.01 to 0.01)             | 0 01<br>(0.01 to 0.01)             | 0 01<br>(-0.01 to 0.01)            | <0.01<br>(-0.01 to 0.01)     | <0.01<br>(-0.01 to 0.01)     | <0.01<br>(-0.01 to 0.01)     | <0.01<br>(-0.01 to 0.01)     | <0.01<br>(-0.01 to 0.01)     | <0.01<br>(-0.01 to 0.01)     |
| Cuba                                   | 4 67<br>(4.62 to 4.73)             | 2 58<br>(2.54 to 2.63)             | 1 43<br>(1.39 to 1.47)             | 1 37<br>(1.33 to 1.43)             | 1 08<br>(1.05 to 1.12)       | 0 70<br>(0.68 to 0.72)       | 0 54<br>(0.52 to 0.55)       | 0 37<br>(0.36 to 0.38)       | 0 33<br>(0.32 to 0.34)       | 0 25<br>(0.20 to 0.31)       |
| Dominica                               | 0 08<br>(0.05 to 0.11)             | 0 04<br>(0.02 to 0.05)             | 0 02<br>(0.01 to 0.03)             | 0 02<br>(0.01 to 0.02)             | 0 01<br>(0.01 to 0.02)       | 0 01<br>(0.01 to 0.02)       | 0 01<br>(0.01 to 0.02)       | 0 01<br>(0.01 to 0.02)       | 0 01<br>(0.01 to 0.02)       | 0 01<br>(0.01 to 0.02)       |
| Dominican Republic                     | 9 28<br>(7.94 to 10.63)            | 9 02<br>(7.85 to 10.22)            | 7 82<br>(6.90 to 8.80)             | 6 07<br>(5.30 to 6.90)             | 5 29<br>(4.39 to 6.20)       | 4 40<br>(3.55 to 5.28)       | 3 47<br>(2.94 to 4.06)       | 3 38<br>(2.70 to 4.18)       | 2 86<br>(2.22 to 3.65)       | 2 18<br>(1.55 to 2.93)       |
| Grenada                                | 0 07<br>(0.04 to 0.11)             | 0 06<br>(0.04 to 0.09)             | 0 04<br>(0.02 to 0.08)             | 0 04<br>(0.02 to 0.07)             | 0 02<br>(0.01 to 0.04)       | 0 02<br>(0.01 to 0.03)       | 0 01<br>(0.01 to 0.02)       | 0 01<br>(0.01 to 0.02)       | 0 01<br>(0.01 to 0.02)       | 0 01<br>(0.01 to 0.02)       |
| Guyana                                 | 0 87<br>(0.76 to 0.99)             | 0 81<br>(0.72 to 0.90)             | 0 69<br>(0.61 to 0.78)             | 0 56<br>(0.47 to 0.65)             | 0 51<br>(0.40 to 0.62)       | 0 42<br>(0.34 to 0.51)       | 0 33<br>(0.27 to 0.40)       | 0 26<br>(0.22 to 0.31)       | 0 19<br>(0.15 to 0.24)       | 0 14<br>(0.11 to 0.19)       |
| Haiti                                  | 23 81<br>(18.15 to 29.45)          | 22 00<br>(16.75 to 27.11)          | 21 26<br>(16.18 to 27.12)          | 20 12<br>(16.09 to 24.38)          | 18 08<br>(14.32 to 21.91)    | 15 63<br>(12.52 to 18.98)    | 13 11<br>(9.36 to 17.41)     | 12 52<br>(9.76 to 15.54)     | 24 74<br>(13.24 to 36.84)    | 8 16<br>(5.02 to 12.79)      |
| Jamaica                                | 1 86<br>(1.53 to 2.20)             | 1 43<br>(1.17 to 1.74)             | 1 23<br>(0.89 to 1.64)             | 1 07<br>(0.79 to 1.43)             | 0 98<br>(0.66 to 1.44)       | 0 84<br>(0.54 to 1.25)       | 0 72<br>(0.47 to 1.07)       | 0 59<br>(0.35 to 0.96)       | 0 57<br>(0.29 to 1.03)       | 0 51<br>(0.28 to 0.83)       |
| Puerto Rico                            | 0 94<br>(0.92 to 0.97)             | 0 75<br>(0.73 to 0.77)             | 0 63<br>(0.61 to 0.65)             | 0 48<br>(0.46 to 0.51)             | 0 43<br>(0.42 to 0.44)       | 0 37<br>(0.35 to 0.39)       | 0 28<br>(0.26 to 0.30)       | 0 21<br>(0.19 to 0.23)       | 0 17<br>(0.15 to 0.19)       | 0 12<br>(0.10 to 0.15)       |
| Saint Lucia                            | 0 13<br>(0.08 to 0.23)             | 0 09<br>(0.06 to 0.14)             | 0 06<br>(0.04 to 0.09)             | 0 05<br>(0.03 to 0.08)             | 0 04<br>(0.02 to 0.06)       | 0 03<br>(0.02 to 0.05)       | 0 02<br>(0.01 to 0.04)       | 0 02<br>(0.01 to 0.03)       | 0 02<br>(0.01 to 0.03)       | 0 01<br>(0.01 to 0.03)       |
| Saint Vincent and the Grenadines       | 0 16<br>(0.10 to 0.22)             | 0 11<br>(0.07 to 0.16)             | 0 07<br>(0.05 to 0.11)             | 0 05<br>(0.03 to 0.07)             | 0 04<br>(0.02 to 0.05)       | 0 03<br>(0.02 to 0.04)       | 0 02<br>(0.01 to 0.03)       | 0 02<br>(0.01 to 0.03)       | 0 02<br>(0.01 to 0.02)       | 0 01<br>(0.01 to 0.02)       |
| Suriname                               | 0 40<br>(0.33 to 0.50)             | 0 32<br>(0.27 to 0.38)             | 0 28<br>(0.24 to 0.33)             | 0 27<br>(0.23 to 0.32)             | 0 26<br>(0.20 to 0.32)       | 0 25<br>(0.19 to 0.33)       | 0 24<br>(0.18 to 0.31)       | 0 21<br>(0.14 to 0.29)       | 0 18<br>(0.11 to 0.27)       | 0 18<br>(0.09 to 0.23)       |
| Trinidad and Tobago                    | 0 66<br>(0.57 to 0.74)             | 0 59<br>(0.50 to 0.68)             | 0 54<br>(0.45 to 0.64)             | 0 45<br>(0.37 to 0.55)             | 0 45<br>(0.24 to 0.37)       | 0 30<br>(0.18 to 0.32)       | 0 23<br>(0.17 to 0.30)       | 0 20<br>(0.14 to 0.27)       | 0 17<br>(0.09 to 0.29)       | 0 12<br>(0.05 to 0.27)       |
| Virgin Islands, U.S.                   | 0 03<br>(0.03 to 0.04)             | 0 03<br>(0.03 to 0.03)             | 0 03<br>(0.02 to 0.03)             | 0 02<br>(0.02 to 0.02)             | 0 02<br>(0.02 to 0.02)       | 0 01<br>(0.01 to 0.02)       | 0 01<br>(0.01 to 0.01)       | 0 01<br>(0.01 to 0.01)       | 0 01<br>(-0.01 to 0.01)      | <0.01<br>(-0.01 to 0.01)     |
| Tropical Latin America                 | 167 34<br>(159.59 to 175.22)       | 157 08<br>(150.47 to 163.88)       | 138 36<br>(133.07 to 143.48)       | 114 70<br>(110.97 to 118.32)       | 88 57<br>(85.69 to 91.66)    | 67 27<br>(65.29 to 69.34)    | 50 23<br>(48.10 to 52.48)    | 39 01<br>(37.04 to 41.08)    | 31 04<br>(28.93 to 33.21)    | 23 67<br>(21.99 to 25.36)    |
| Brazil                                 | 164 73<br>(157.03 to 172.63)       | 154 62<br>(148.02 to 161.42)       | 136 10<br>(130.91 to 141.25)       | 112 47<br>(108.75 to 116.14)       | 86 60<br>(83.68 to 89.68)    | 65 45<br>(63.50 to 67.52)    | 48 41<br>(46.35 to 50.63)    | 37 41<br>(35.48 to 39.46)    | 29 72<br>(27.65 to 31.86)    | 22 64<br>(20.96 to 24.31)    |
| Paraguay                               | 2 61<br>(2.31 to 2.94)             | 2 47<br>(2.21 to 2.73)             | 2 26<br>(1.96 to 2.55)             | 2 23<br>(2.01 to 2.48)             | 1 97<br>(1.78 to 2.17)       | 1 82<br>(1.56 to 2.09)       | 1 61<br>(1.58 to 2.09)       | 1 32<br>(1.34 to 1.90)       | 1 03<br>(1.01 to 1.73)       | 1 03<br>(0.77 to 1.36)       |
| Southeast Asia, East Asia, and Oceania | 2,232 15<br>(2,154.12 to 2,317.32) | 1,701 57<br>(1,644.71 to 1,762.24) | 1,327 66<br>(1,282.07 to 1,372.93) | 1,135 46<br>(1,099.75 to 1,169.64) | 933 94<br>(905.89 to 965.12) | 713 37<br>(684.84 to 744.43) | 522 07<br>(498.06 to 548.50) | 354 90<br>(340.57 to 370.45) | 263 96<br>(251.86 to 276.47) | 176 11<br>(164.81 to 187.76) |
| East Asia                              | 1,584 90<br>(1,509.67 to 1,666.01) | 1,123 59<br>(1,073.74 to 1,175.33) | 835 95<br>(798.32 to 876.18)       | 706 00<br>(673.30 to 736.94)       | 573 02<br>(549.57 to 599.60) | 411 34<br>(387.98 to 438.36) | 270 27<br>(250.42 to 292.56) | 150 84<br>(144.18 to 157.73) | 102 70<br>(97.34 to 108.24)  | 64 99<br>(59.25 to 71.56)    |
| China                                  | 1,564 00<br>(1,488.73 to 1,643.28) | 1,109 89<br>(1,059.34 to 1,161.22) | 825 86<br>(788.97 to 866.33)       | 696 34<br>(665.20 to 726.76)       | 563 86<br>(540.03 to 591.11) | 378 61<br>(364.34 to 393.69) | 237 64<br>(228.81 to 247.32) | 140 10<br>(134.42 to 145.55) | 93 73<br>(89.77 to 98.03)    | 57 48<br>(52.36 to 63.00)    |
| North Korea                            | 16 05<br>(10.87 to 22.38)          | 10 47<br>(6.84 to 14.76)           | 7 31<br>(4.77 to 10.49)            | 7 99<br>(5.28 to 11.40)            | 7 92<br>(5.03 to 11.71)      | 31 45<br>(13.44 to 51.61)    | 31 53<br>(14.85 to 50.01)    | 10 09<br>(6.74 to 14.58)     | 8 53<br>(5.61 to 12.45)      | 7 11<br>(4.66 to 10.88)      |
| Taiwan (Province of China)             | 4 85<br>(4.74 to 4.96)             | 3 22<br>(3.14 to 3.31)             | 2 77<br>(2.70 to 2.85)             | 1 67<br>(1.62 to 1.72)             | 1 24<br>(1.20 to 1.28)       | 1 27<br>(1.23 to 1.32)       | 1 10<br>(1.06 to 1.13)       | 0 65<br>(0.62 to 0.67)       | 0 44<br>(0.42 to 0.46)       | 0 40<br>(0.35 to 0.46)       |
| Southeast Asia                         | 639 36<br>(608.90 to 672.20)       | 569 99<br>(539.40 to 602.85)       | 484 15<br>(461.68 to 507.20)       | 421 91<br>(405.16 to 439.04)       | 353 29<br>(337.53 to 371.40) | 294 41<br>(278.26 to 314.09) | 244 23<br>(230.78 to 260.43) | 196 53<br>(183.97 to 211.21) | 154 33<br>(144.37 to 165.64) | 105 18<br>(95.91 to 114.98)  |
| Cambodia                               | 23 62<br>(19.54 to 28.06)          | 41 99<br>(24.19 to 61.35)          | 18 48<br>(15.88 to 21.25)          | 16 60<br>(14.34 to 18.93)          | 15 15<br>(13.58 to 16.75)    | 15 50<br>(14.06 to 17.15)    | 13 73<br>(12.46 to 15.11)    | 10 56<br>(9.39 to 11.85)     | 7 71<br>(6.59 to 8.88)       | 5 33<br>(4.22 to 6.57)       |
| Indonesia                              | 333 01<br>(322.44 to 343.31)       | 284 56<br>(272.60 to 296.39)       | 251 66<br>(241.57 to 261.29)       | 214 16<br>(206.88 to 222.02)       | 170 32<br>(165.37 to 175.75) | 138 43<br>(134.31 to 142.56) | 113 53<br>(109.84 to 117.05) | 70 81<br>(85.55 to 92.39)    | 70 81<br>(67.38 to 74.67)    | 45 75<br>(41.91 to 50.00)    |
| Laos                                   | 16 80<br>(10.28 to 25.22)          | 16 47<br>(10.76 to 23.22)          | 14 31<br>(10.19 to 18.84)          | 13 17<br>(9.91 to 16.29)           | 13 45<br>(10.57 to 16.64)    | 13 42<br>(10.30 to 16.77)    | 11 73<br>(9.26 to 14.35)     | 8 00<br>(7.38 to 12.16)      | 8 00<br>(5.16 to 11.71)      | 6 47<br>(3.26 to 11.23)      |
| Malaysia                               | 8 59<br>(8.41 to 8.77)             | 7 05<br>(6.78 to 7.30)             | 5 55<br>(5.23 to 5.90)             | 4 69<br>(4.56 to 4.82)             | 3 71<br>(3.60 to 3.83)       | 3 10<br>(3.02 to 3.19)       | 2 19<br>(2.12 to 2.26)       | 1 72<br>(1.66 to 1.78)       | 1 35<br>(1.69 to 1.94)       | 1 35<br>(1.18 to 1.54)       |
| Maldives                               | 0 56<br>(0.49 to 0.63)             | 0 47<br>(0.41 to 0.54)             | 0 43<br>(0.38 to 0.49)             | 0 35<br>(0.30 to 0.40)             | 0 23<br>(0.20 to 0.26)       | 0 13<br>(0.11 to 0.15)       | 0 07<br>(0.06 to 0.08)       | 0 05<br>(0.04 to 0.05)       | 0 03<br>(0.03 to 0.04)       | 0 02<br>(0.02 to 0.02)       |
| Mauritius                              | 0 88<br>(0.85 to 0.90)             | 0 63<br>(0.61 to 0.65)             | 0 42<br>(0.41 to 0.43)             | 0 23<br>(0.22 to 0.24)             | 0 21<br>(0.20 to 0.22)       | 0 19<br>(0.18 to 0.19)       | 0 15<br>(0.15 to 0.16)       | 0 12<br>(0.12 to 0.13)       | 0 09<br>(0.09 to 0.10)       | 0 08<br>(0.07 to 0.10)       |
| Myanmar                                | 68 12<br>(47.14 to 92.95)          | 60 76<br>(43.51 to 81.14)          | 55 77<br>(40.02 to 72.79)          | 52 89<br>(40.18 to 67.00)          | 49 91<br>(36.66 to 65.56)    | 45 49<br>(32.13 to 63.94)    | 39 92<br>(27.53 to 55.42)    | 31 45<br>(20.76 to 45.28)    | 24 35<br>(12.88 to 28.76)    | 19 84<br>(6.51 to 18.44)     |
| Philippines                            | 56 23<br>(52.71 to 59.93)          | 55 93<br>(51.72 to 60.35)          | 53 15<br>(52.07 to 61.00)          | 53 15<br>(49.16 to 57.13)          | 46 31<br>(42.81 to 50.17)    | 39 68<br>(36.89 to 42.65)    | 35 60<br>(32.72 to 38.70)    | 32 91<br>(29.73 to 36.40)    | 29 42<br>(25.50 to 33.80)    | 24 35<br>(20.18 to 29.14)    |
| Sri Lanka                              | 11 83<br>(11.56 to 12.11)          | 11 92<br>(11.57 to 12.29)          | 8 35<br>(8.14 to 8.56)             | 5 67<br>(5.50 to 5.83)             | 5 40<br>(5.15 to 5.67)       | 3 33<br>(3.24 to 3.43)       | 2 61<br>(2.51 to 2.72)       | 2 88<br>(2.79 to 2.97)       | 2 24<br>(1.99 to 2.47)       | 0 86<br>(0.57 to 1.26)       |
| Seychelles                             | 0 06<br>(0.06 to 0.07)             | 0 04<br>(0.04 to 0.04)             | 0 03<br>(0.02 to 0.03)             | 0 02<br>(0.02 to 0.02)             | 0 01<br>(0.01 to 0.01)       | 0 01<br>(0.01 to 0.01)       | 0 01<br>(0.01 to 0.01)       | 0 01<br>(0.01 to 0.01)       | 0 01<br>(0.01 to 0.01)       | 0 01<br>(0.01 to 0.01)       |
| Thailand                               | 55 86<br>(49.12 to 63.03)          | 43 89<br>(38.09 to 50.05)          | 31 53<br>(25.13 to 37.96)          | 21 08<br>(17.19 to 25.39)          | 14 84<br>(11.79 to 18.26)    | 10 54<br>(11.79 to 18.26)    | 7 22<br>(7.96 to 13.45)      | 4 54<br>(5.37 to 9.44)       | 2 85<br>(3.51 to 5.92)       | 1 62<br>(2.29 to 3.53)       |
| Timor-Leste                            | 3 18<br>(2.24 to 4.28)             | 3 23<br>(2.40 to 4.08)             | 2 85<br>(2.17 to 3.55)             | 2 14<br>(1.65 to 2.71)             | 1 81<br>(1.42 to 2.23)       | 1 48<br>(1.15 to 1.82)       | 0 94<br>(0.70 to 1.22)       | 0 78<br>(0.55 to 1.04)       | 0 52<br>(0.50 to 1.10)       | 0 52<br>(0.29 to 0.84)       |
| Vietnam                                | 59 63<br>(45.62 to 74.58)          | 42 39<br>(36.15 to 49.50)          | 37 72<br>(32.31 to 43.55)          | 32 72<br>(31.44 to 43.66)          | 27 76<br>(25.91 to 37.68)    | 22 76<br>(19.02 to 26.93)    | 16 22<br>(14.28 to 18.30)    | 12 64<br>(10.61 to 15.00)    | 10 57<br>(8.39 to 13.27)     | 7 72<br>(5.87 to 10.19)      |
| Oceania                                | 7 88<br>(6.52 to 9.36)             | 7 99<br>(6.67 to 9.42)             | 7 57<br>(6.40 to 8.86)             | 7 57<br>(6.34 to 8.86)             | 7 57<br>(6.26 to 9.10)       | 7 57<br>(6.06 to 9.48)       | 7 53<br>(5.56 to 9.97)       | 7 53<br>(4.97 to 10.76)      | 5 95<br>(4.32 to 10.47)      | 5 95<br>(3.67 to 9.40)       |
| American Samoa                         | 0 02<br>(0.01 to 0.02)             | 0 01<br>(0.01 to 0.01)             | 0 01<br>(0.01 to 0.01)             | 0 01<br>(0.01 to 0.01)             | 0 01<br>(0.01 to 0.01)       | 0 01<br>(0.01 to 0.01)       | 0 01<br>(0.01 to 0.01)       | 0 01<br>(0.01 to 0.01)       | 0 01<br>(0.01 to 0.01)       | 0 01<br>(-0.01 to 0.01)      |
| Federated States of Micronesia         | 0 11<br>(0.08 to 0.15)             | 0 09<br>(0.07 to 0.12)             | 0 09<br>(0.07 to 0.13)             | 0 09<br>(0.07 to 0.11)             | 0 09<br>(0.05 to 0.10)       | 0 05<br>(0.04 to 0.07)       | 0 04<br>(0.03 to 0.06)       | 0 02<br>(0.01 to 0.03)       | 0 02<br>(0.01 to 0.03)       | 0 01<br>(0.01 to 0.02)       |
| Fiji                                   | 0 42<br>(0.37 to 0.47)             | 0 45<br>(0.36 to 0.55)             | 0 36<br>(0.27 to 0.46)             | 0 28<br>(0.20 to 0.37)             | 0 20<br>(0.14 to 0.31)       | 0 20<br>(0.14 to 0.27)       | 0 20<br>(0.15 to 0.24)       | 0 20<br>(0.15 to 0.24)       | 0 19<br>(0.14 to 0.26)       | 0 17<br>(0.10 to 0.27)       |
| Guam                                   | 0 03<br>(0.03 to 0.04)             | 0 03<br>(0.03 to 0.03)             | 0 02<br>(0.02 to 0.02)             | 0 02<br>(0.02 to 0.02)             | 0 02<br>(0.02 to 0.          |                              |                              |                              |                              |                              |

Appendix Table 12C. Under-5 death numbers by location, females, 1970, 1975, 1980, 1985, 1990, 1995, 2000, 2005, 2010, 2016

| Location                     | 1970                               | 1975                               | 1980                               | 1985                               | 1990                               | 1995                               | 2000                               | 2005                               | 2010                               | 2016                               |
|------------------------------|------------------------------------|------------------------------------|------------------------------------|------------------------------------|------------------------------------|------------------------------------|------------------------------------|------------------------------------|------------------------------------|------------------------------------|
| Tonga                        | 0.05<br>(0.03 to 0.07)             | 0.04<br>(0.03 to 0.06)             | 0.04<br>(0.03 to 0.06)             | 0.04<br>(0.02 to 0.05)             | 0.03<br>(0.02 to 0.05)             | 0.03<br>(0.02 to 0.05)             | 0.03<br>(0.02 to 0.05)             | 0.03<br>(0.02 to 0.05)             | 0.03<br>(0.01 to 0.04)             | 0.02<br>(0.01 to 0.03)             |
| Vanuatu                      | 0.16<br>(0.11 to 0.23)             | 0.15<br>(0.10 to 0.21)             | 0.13<br>(0.09 to 0.19)             | 0.12<br>(0.08 to 0.16)             | 0.11<br>(0.09 to 0.14)             | 0.11<br>(0.08 to 0.14)             | 0.12<br>(0.09 to 0.15)             | 0.13<br>(0.10 to 0.17)             | 0.13<br>(0.09 to 0.17)             | 0.12<br>(0.08 to 0.17)             |
| North Africa and Middle East | 770.82<br>(717.22 to 828.90)       | 673.39<br>(626.01 to 715.56)       | 585.79<br>(546.17 to 628.16)       | 501.56<br>(466.45 to 535.96)       | 378.70<br>(355.25 to 402.49)       | 313.65<br>(290.67 to 340.32)       | 262.40<br>(237.59 to 285.77)       | 226.69<br>(204.48 to 251.19)       | 200.48<br>(178.26 to 223.61)       | 163.09<br>(137.46 to 190.44)       |
| North Africa and Middle East | 770.82<br>(717.22 to 828.90)       | 673.39<br>(626.01 to 715.56)       | 585.79<br>(546.17 to 628.16)       | 501.56<br>(466.45 to 535.96)       | 378.70<br>(355.25 to 402.49)       | 313.65<br>(290.67 to 340.32)       | 262.40<br>(237.59 to 285.77)       | 226.69<br>(204.48 to 251.19)       | 200.48<br>(178.26 to 223.61)       | 163.09<br>(137.46 to 190.44)       |
| Afghanistan                  | 66.02<br>(46.55 to 84.87)          | 69.76<br>(51.06 to 89.24)          | 71.40<br>(54.11 to 89.25)          | 57.92<br>(43.96 to 72.28)          | 39.99<br>(30.60 to 48.97)          | 46.80<br>(34.70 to 57.45)          | 48.73<br>(37.04 to 58.79)          | 47.27<br>(37.93 to 56.55)          | 38.70<br>(30.18 to 47.50)          | 35.47<br>(25.07 to 46.33)          |
| Algeria                      | 48.69<br>(40.44 to 56.76)          | 42.96<br>(35.17 to 50.50)          | 34.77<br>(28.68 to 40.82)          | 25.16<br>(20.15 to 30.12)          | 18.81<br>(15.11 to 22.90)          | 16.91<br>(12.87 to 21.73)          | 15.32<br>(11.67 to 19.40)          | 13.18<br>(10.40 to 16.20)          | 10.74<br>(7.75 to 14.18)           | 7.15<br>(4.67 to 10.62)            |
| Bahrain                      | 0.32<br>(0.24 to 0.41)             | 0.22<br>(0.17 to 0.27)             | 0.15<br>(0.13 to 0.16)             | 0.13<br>(0.12 to 0.14)             | 0.15<br>(0.14 to 0.16)             | 0.11<br>(0.10 to 0.12)             | 0.08<br>(0.07 to 0.09)             | 0.07<br>(0.07 to 0.08)             | 0.07<br>(0.06 to 0.08)             | 0.06<br>(0.05 to 0.08)             |
| Egypt                        | 177.80<br>(158.93 to 197.23)       | 159.88<br>(143.35 to 177.45)       | 129.20<br>(113.13 to 145.42)       | 96.74<br>(86.34 to 107.82)         | 71.05<br>(63.76 to 78.91)          | 49.56<br>(44.21 to 55.60)          | 35.83<br>(31.03 to 41.29)          | 30.97<br>(26.18 to 36.17)          | 27.79<br>(23.05 to 33.37)          | 18.79<br>(13.21 to 26.87)          |
| Iran                         | 149.71<br>(114.05 to 187.66)       | 97.15<br>(74.96 to 122.57)         | 85.19<br>(64.55 to 107.49)         | 76.39<br>(60.33 to 93.30)          | 61.09<br>(49.48 to 73.98)          | 33.50<br>(24.94 to 43.75)          | 23.36<br>(15.38 to 33.60)          | 16.32<br>(9.47 to 34.53)           | 12.07<br>(6.70 to 30.77)           | 8.33<br>(4.89 to 25.82)            |
| Iraq                         | 24.09<br>(13.15 to 31.63)          | 22.62<br>(12.04 to 29.22)          | 20.40<br>(10.33 to 27.07)          | 19.22<br>(10.55 to 27.25)          | 20.19<br>(6.41 to 21.75)           | 15.08<br>(7.04 to 25.33)           | 16.63<br>(8.37 to 22.86)           | 17.92<br>(12.14 to 24.17)          | 20.66<br>(11.86 to 28.81)          | 21.27<br>(10.63 to 31.96)          |
| Jordan                       | 4.59<br>(4.15 to 5.07)             | 4.02<br>(3.69 to 4.37)             | 2.63<br>(2.42 to 2.84)             | 2.06<br>(1.81 to 2.31)             | 1.79<br>(1.58 to 2.01)             | 2.03<br>(1.74 to 2.34)             | 1.84<br>(1.60 to 2.08)             | 1.72<br>(1.52 to 1.94)             | 1.69<br>(1.45 to 1.95)             | 1.61<br>(1.28 to 2.05)             |
| Kuwait                       | 0.83<br>(0.79 to 0.87)             | 0.96<br>(0.92 to 1.00)             | 0.76<br>(0.72 to 0.80)             | 0.53<br>(0.50 to 0.56)             | 0.32<br>(0.27 to 0.37)             | 0.26<br>(0.24 to 0.28)             | 0.25<br>(0.23 to 0.26)             | 0.24<br>(0.22 to 0.26)             | 0.24<br>(0.26 to 0.30)             | 0.24<br>(0.17 to 0.32)             |
| Lebanon                      | 3.12<br>(2.48 to 3.93)             | 3.39<br>(2.53 to 4.28)             | 3.49<br>(2.22 to 4.88)             | 1.83<br>(1.35 to 2.36)             | 1.22<br>(1.00 to 1.48)             | 0.82<br>(0.62 to 1.05)             | 0.52<br>(0.38 to 0.70)             | 0.37<br>(0.24 to 0.53)             | 0.31<br>(0.20 to 0.44)             | 0.33<br>(0.23 to 0.45)             |
| Libya                        | 4.20<br>(3.45 to 4.96)             | 3.37<br>(2.87 to 3.89)             | 2.63<br>(2.20 to 3.13)             | 2.23<br>(1.74 to 2.75)             | 2.03<br>(1.58 to 2.51)             | 1.79<br>(1.43 to 2.18)             | 1.62<br>(1.22 to 2.05)             | 1.31<br>(0.93 to 1.74)             | 0.88<br>(0.60 to 1.20)             | 0.53<br>(0.36 to 0.74)             |
| Morocco                      | 45.82<br>(42.05 to 49.70)          | 40.93<br>(37.99 to 44.02)          | 35.48<br>(32.60 to 38.39)          | 29.71<br>(27.57 to 31.60)          | 23.96<br>(22.07 to 25.87)          | 17.99<br>(16.08 to 20.08)          | 12.96<br>(11.28 to 14.92)          | 9.37<br>(7.94 to 11.04)            | 6.70<br>(5.27 to 8.46)             | 4.26<br>(3.28 to 5.45)             |
| Palestine                    | 2.34<br>(1.38 to 3.28)             | 2.23<br>(1.16 to 3.12)             | 1.97<br>(0.84 to 2.80)             | 1.56<br>(0.64 to 2.30)             | 1.67<br>(0.72 to 2.45)             | 1.43<br>(0.71 to 2.07)             | 1.45<br>(0.70 to 2.12)             | 1.43<br>(0.78 to 2.14)             | 1.78<br>(1.09 to 2.47)             | 1.71<br>(0.83 to 2.66)             |
| Oman                         | 5.13<br>(4.47 to 5.82)             | 4.46<br>(3.77 to 5.13)             | 3.57<br>(2.90 to 4.26)             | 2.53<br>(2.06 to 3.05)             | 1.67<br>(1.35 to 2.04)             | 1.05<br>(0.84 to 1.32)             | 0.65<br>(0.54 to 0.79)             | 0.32<br>(0.28 to 0.37)             | 0.34<br>(0.29 to 0.39)             | 0.33<br>(0.24 to 0.44)             |
| Qatar                        | 0.14<br>(0.09 to 0.19)             | 0.15<br>(0.11 to 0.19)             | 0.12<br>(0.08 to 0.16)             | 0.12<br>(0.09 to 0.15)             | 0.11<br>(0.08 to 0.14)             | 0.09<br>(0.07 to 0.13)             | 0.08<br>(0.06 to 0.11)             | 0.08<br>(0.06 to 0.11)             | 0.10<br>(0.07 to 0.15)             | 0.11<br>(0.07 to 0.16)             |
| Saudi Arabia                 | 18.74<br>(16.39 to 21.31)          | 16.83<br>(15.28 to 18.55)          | 15.14<br>(13.38 to 17.02)          | 14.96<br>(12.98 to 17.27)          | 12.99<br>(11.09 to 15.24)          | 9.44<br>(7.85 to 11.50)            | 7.02<br>(5.78 to 8.71)             | 4.78<br>(3.98 to 5.79)             | 2.97<br>(2.45 to 3.62)             | 1.36<br>(1.08 to 1.71)             |
| Sudan                        | 34.92<br>(28.51 to 41.67)          | 37.57<br>(29.68 to 45.68)          | 39.32<br>(31.12 to 47.38)          | 59.02<br>(43.72 to 74.70)          | 36.86<br>(31.60 to 42.97)          | 38.47<br>(30.09 to 45.79)          | 37.26<br>(30.09 to 45.34)          | 32.20<br>(23.78 to 40.61)          | 30.77<br>(22.17 to 40.40)          | 24.06<br>(13.50 to 40.49)          |
| Syria                        | 13.51<br>(12.01 to 14.97)          | 12.37<br>(10.85 to 13.93)          | 10.59<br>(9.04 to 12.21)           | 9.42<br>(7.75 to 11.34)            | 8.39<br>(6.78 to 10.07)            | 6.04<br>(5.05 to 6.99)             | 3.94<br>(3.35 to 4.58)             | 3.28<br>(2.74 to 3.86)             | 3.36<br>(2.74 to 4.07)             | 4.67<br>(2.12 to 7.22)             |
| Tunisia                      | 13.27<br>(12.20 to 14.44)          | 10.67<br>(9.97 to 11.40)           | 8.63<br>(7.98 to 9.34)             | 6.59<br>(5.83 to 7.40)             | 4.74<br>(4.27 to 5.25)             | 3.07<br>(2.70 to 3.47)             | 1.93<br>(1.68 to 2.22)             | 1.50<br>(1.30 to 1.72)             | 1.32<br>(1.09 to 1.57)             | 0.82<br>(0.62 to 1.07)             |
| Turkey                       | 111.94<br>(95.75 to 128.53)        | 104.96<br>(87.62 to 123.52)        | 86.10<br>(69.71 to 105.44)         | 62.15<br>(49.09 to 75.80)          | 43.71<br>(35.41 to 52.85)          | 33.71<br>(27.87 to 40.26)          | 23.67<br>(19.62 to 28.30)          | 16.21<br>(13.28 to 19.78)          | 12.38<br>(9.21 to 16.40)           | 8.26<br>(5.79 to 11.51)            |
| United Arab Emirates         | 0.56<br>(0.39 to 0.78)             | 0.69<br>(0.45 to 1.03)             | 0.88<br>(0.56 to 1.29)             | 0.77<br>(0.43 to 1.26)             | 0.56<br>(0.29 to 0.92)             | 0.45<br>(0.23 to 0.81)             | 0.35<br>(0.18 to 0.59)             | 0.28<br>(0.22 to 0.35)             | 0.27<br>(0.47 to 0.76)             | 0.39<br>(0.21 to 0.70)             |
| Yemen                        | 44.74<br>(21.88 to 57.25)          | 37.98<br>(18.58 to 48.84)          | 33.05<br>(17.18 to 41.77)          | 31.25<br>(17.48 to 38.87)          | 32.29<br>(22.70 to 38.73)          | 33.29<br>(20.28 to 43.05)          | 29.68<br>(15.75 to 40.43)          | 24.45<br>(13.48 to 34.48)          | 22.68<br>(12.59 to 32.24)          | 19.47<br>(9.09 to 30.86)           |
| South Asia                   | 2,489.71<br>(2,413.70 to 2,569.59) | 2,365.89<br>(2,295.21 to 2,440.33) | 2,322.16<br>(2,239.44 to 2,399.01) | 2,168.65<br>(2,092.00 to 2,247.14) | 1,920.29<br>(1,853.94 to 1,984.41) | 1,668.45<br>(1,613.22 to 1,720.03) | 1,425.25<br>(1,389.01 to 1,461.37) | 1,220.03<br>(1,187.49 to 1,252.77) | 968.38<br>(930.31 to 1,007.83)     | 603.96<br>(565.22 to 643.79)       |
| South Asia                   | 2,489.71<br>(2,413.70 to 2,569.59) | 2,365.89<br>(2,295.21 to 2,440.33) | 2,322.16<br>(2,239.44 to 2,399.01) | 2,168.65<br>(2,092.00 to 2,247.14) | 1,920.29<br>(1,853.94 to 1,984.41) | 1,668.45<br>(1,613.22 to 1,720.03) | 1,425.25<br>(1,389.01 to 1,461.37) | 1,220.03<br>(1,187.49 to 1,252.77) | 968.38<br>(930.31 to 1,007.83)     | 603.96<br>(565.22 to 643.79)       |
| Bangladesh                   | 288.89<br>(263.50 to 314.89)       | 263.12<br>(242.10 to 284.45)       | 260.57<br>(242.75 to 280.21)       | 252.47<br>(234.45 to 269.13)       | 221.27<br>(207.73 to 234.39)       | 173.30<br>(161.75 to 185.73)       | 132.76<br>(122.73 to 142.34)       | 104.85<br>(96.60 to 113.61)        | 75.97<br>(68.19 to 84.15)          | 44.64<br>(38.43 to 52.45)          |
| Bhutan                       | 1.71<br>(1.48 to 1.95)             | 1.73<br>(1.51 to 1.98)             | 1.69<br>(1.45 to 1.94)             | 1.51<br>(1.28 to 1.75)             | 1.33<br>(1.16 to 1.50)             | 1.01<br>(0.88 to 1.14)             | 0.83<br>(0.71 to 0.97)             | 0.64<br>(0.54 to 0.74)             | 0.43<br>(0.36 to 0.51)             | 0.24<br>(0.19 to 0.30)             |
| India                        | 1,919.21<br>(1,851.93 to 1,988.44) | 1,816.93<br>(1,752.03 to 1,883.68) | 1,763.00<br>(1,689.61 to 1,836.95) | 1,606.78<br>(1,535.25 to 1,678.09) | 1,415.19<br>(1,360.00 to 1,472.23) | 1,249.80<br>(1,205.26 to 1,295.49) | 1,085.99<br>(1,056.67 to 1,117.60) | 926.87<br>(900.22 to 953.40)       | 712.82<br>(684.67 to 742.17)       | 427.56<br>(401.81 to 455.07)       |
| Nepal                        | 58.33<br>(43.80 to 71.67)          | 59.04<br>(45.20 to 73.54)          | 58.32<br>(43.90 to 71.39)          | 54.49<br>(41.93 to 66.11)          | 47.95<br>(37.64 to 58.00)          | 38.37<br>(31.38 to 45.28)          | 30.34<br>(24.34 to 36.71)          | 21.81<br>(17.25 to 26.58)          | 16.39<br>(13.27 to 19.79)          | 11.23<br>(8.36 to 14.58)           |
| Pakistan                     | 221.57<br>(198.37 to 243.00)       | 225.07<br>(202.71 to 246.82)       | 238.58<br>(220.98 to 256.48)       | 253.41<br>(235.28 to 272.74)       | 234.55<br>(209.74 to 258.84)       | 205.96<br>(183.54 to 228.69)       | 175.33<br>(160.36 to 192.27)       | 165.86<br>(149.60 to 183.36)       | 162.76<br>(139.86 to 188.53)       | 120.28<br>(95.10 to 149.33)        |
| Sub-Saharan Africa           | 1,351.46<br>(1,267.34 to 1,429.31) | 1,388.23<br>(1,305.22 to 1,465.27) | 1,419.38<br>(1,344.59 to 1,485.68) | 1,472.79<br>(1,403.93 to 1,538.28) | 1,544.28<br>(1,477.05 to 1,603.71) | 1,607.02<br>(1,521.38 to 1,689.16) | 1,623.80<br>(1,536.26 to 1,704.87) | 1,561.82<br>(1,483.43 to 1,640.87) | 1,451.55<br>(1,364.85 to 1,540.94) | 1,207.09<br>(1,118.95 to 1,310.64) |
| Southern Sub-Saharan Africa  | 52.88<br>(47.17 to 59.52)          | 52.75<br>(47.47 to 58.44)          | 53.30<br>(48.22 to 58.80)          | 51.43<br>(46.59 to 57.03)          | 47.50<br>(44.05 to 50.99)          | 46.70<br>(44.22 to 49.16)          | 53.45<br>(49.87 to 57.08)          | 58.84<br>(53.65 to 64.42)          | 52.25<br>(46.51 to 58.55)          | 38.88<br>(33.31 to 45.79)          |
| Botswana                     | 1.19<br>(0.85 to 1.54)             | 1.07<br>(0.73 to 1.42)             | 1.03<br>(0.73 to 1.34)             | 0.97<br>(0.66 to 1.28)             | 0.87<br>(0.62 to 1.17)             | 1.10<br>(0.72 to 1.52)             | 1.30<br>(0.78 to 1.95)             | 1.00<br>(0.64 to 1.44)             | 0.60<br>(0.41 to 0.85)             | 0.34<br>(0.20 to 0.56)             |
| Lesotho                      | 2.09<br>(1.74 to 2.42)             | 2.12<br>(1.75 to 2.54)             | 2.08<br>(1.65 to 2.57)             | 2.01<br>(1.57 to 2.47)             | 1.81<br>(1.45 to 2.18)             | 1.88<br>(1.52 to 2.25)             | 2.29<br>(1.83 to 2.74)             | 2.56<br>(2.16 to 3.00)             | 2.13<br>(1.73 to 2.59)             | 1.60<br>(1.20 to 2.15)             |
| Namibia                      | 1.57<br>(1.21 to 2.01)             | 1.62<br>(1.32 to 1.96)             | 1.68<br>(1.42 to 1.97)             | 1.52<br>(1.29 to 1.79)             | 1.67<br>(1.44 to 1.93)             | 1.55<br>(1.33 to 1.79)             | 1.73<br>(1.46 to 2.09)             | 1.72<br>(1.45 to 2.04)             | 1.52<br>(1.18 to 1.90)             | 1.12<br>(0.70 to 1.63)             |
| South Africa                 | 37.15<br>(31.60 to 43.75)          | 37.06<br>(31.93 to 42.75)          | 37.41<br>(32.61 to 42.86)          | 36.24<br>(31.58 to 41.75)          | 32.15<br>(28.88 to 35.53)          | 29.44<br>(27.25 to 31.61)          | 33.51<br>(30.25 to 36.90)          | 36.40<br>(31.69 to 41.81)          | 29.39<br>(24.17 to 35.80)          | 21.11<br>(16.19 to 27.52)          |
| Swaziland                    | 1.55<br>(1.10 to 2.12)             | 1.35<br>(1.01 to 1.78)             | 1.17<br>(0.93 to 1.47)             | 1.00<br>(0.83 to 1.18)             | 0.87<br>(0.73 to 1.01)             | 0.94<br>(0.81 to 1.06)             | 1.37<br>(1.17 to 1.56)             | 1.66<br>(1.43 to 1.92)             | 1.40<br>(1.21 to 1.60)             | 0.95<br>(0.72 to 1.21)             |
| Zimbabwe                     | 9.34<br>(8.34 to 10.41)            | 9.52<br>(8.48 to 10.59)            | 9.93<br>(8.93 to 10.96)            | 9.70<br>(8.71 to 10.69)            | 10.14<br>(9.21 to 11.14)           | 11.79<br>(10.68 to 12.94)          | 13.27<br>(12.07 to 14.47)          | 15.50<br>(14.05 to 17.11)          | 17.20<br>(15.14 to 19.27)          | 13.76<br>(11.78 to 16.15)          |
| Western Sub-Saharan Africa   | 660.08<br>(597.66 to 725.61)       | 655.56<br>(596.99 to 712.60)       | 652.95<br>(603.58 to 701.87)       | 666.76<br>(619.00 to 713.24)       | 705.83<br>(668.61 to 744.59)       | 749.28<br>(699.36 to 800.57)       | 775.12<br>(721.46 to 830.14)       | 776.56<br>(719.81 to 838.77)       | 744.75<br>(680.86 to 813.23)       | 640.52<br>(574.72 to 708.23)       |
| Benin                        | 17.38<br>(15.75 to 19.04)          | 16.58<br>(15.05 to 18.07)          | 16.20<br>(15.01 to 17.34)          | 16.35<br>(15.46 to 17.27)          | 16.79<br>(15.40 to 18.22)          | 17.43<br>(15.58 to 19.37)          | 17.26<br>(15.31 to 19.40)          | 16.81<br>(15.20 to 18.80)          | 15.85<br>(13.77 to 18.19)          | 14.05<br>(11.47 to 17.09)          |
| Burkina Faso                 | 39.52<br>(28.37 to 47.97)          | 39.12<br>(28.46 to 47.83)          | 37.85<br>(28.24 to 45.50)          | 38.15<br>(29.03 to 45.55)          | 39.21<br>(32.45 to 44.70)          | 40.49<br>(34.36 to 46.10)          | 41.09<br>(33.00 to 47.96)          | 41.35<br>(31.51 to 50.01)          | 40.16<br>(30.99 to 49.03)          | 34.92<br>(24.71 to 44.78)          |
| Cameroon                     | 29.09<br>(27.04 to 31.15)          | 28.23<br>(26.04 to 30.44)          | 27.91<br>(25.85 to 29.99)          | 27.73<br>(25.79 to 29.80)          | 29.46<br>(27.24 to 31.64)          | 33.71<br>(31.01 to 36.61)          | 36.47<br>(32.64 to 40.82)          | 38.03<br>(33.42 to 42.80)          | 38.41<br>(32.91 to 44.50)          | 35.00<br>(28.25 to 43.61)          |
| Cape Verde                   | 0.76<br>(0.71 to 0.81)             | 0.56<br>(0.52 to 0.60)             | 0.41<br>(0.39 to 0.43)             | 0.49<br>(0.45 to 0.5               |                                    |                                    |                                    |                                    |                                    |                                    |

Appendix Table 12C. Under-5 death numbers by location, females, 1970, 1975, 1980, 1985, 1990, 1995, 2000, 2005, 2010, 2016

| Location                         | 1970                         | 1975                         | 1980                         | 1985                         | 1990                         | 1995                         | 2000                         | 2005                         | 2010                         | 2016                         |
|----------------------------------|------------------------------|------------------------------|------------------------------|------------------------------|------------------------------|------------------------------|------------------------------|------------------------------|------------------------------|------------------------------|
| Liberia                          | 9 18<br>(8 28 to 10 13)      | 9 26<br>(8 38 to 10 12)      | 9 58<br>(8 79 to 10 38)      | 10 22<br>(9 43 to 11 01)     | 9 66<br>(8 96 to 10 37)      | 8 99<br>(8 22 to 9 75)       | 9 21<br>(8 45 to 10 03)      | 7 27<br>(6 66 to 7 87)       | 6 12<br>(5 51 to 6 76)       | 4 64<br>(3 95 to 5 39)       |
| Mali                             | 48 25<br>(45 23 to 51 12)    | 47 80<br>(45 27 to 50 26)    | 45 53<br>(43 17 to 47 94)    | 44 93<br>(42 68 to 47 18)    | 42 53<br>(40 61 to 44 70)    | 43 11<br>(40 70 to 45 86)    | 44 13<br>(41 60 to 47 01)    | 43 15<br>(40 36 to 46 14)    | 40 86<br>(37 18 to 44 83)    | 38 07<br>(32 37 to 45 06)    |
| Mauritania                       | 3 34<br>(3 17 to 3 53)       | 3 52<br>(3 36 to 3 69)       | 3 48<br>(3 28 to 3 68)       | 3 43<br>(3 18 to 3 69)       | 3 37<br>(3 12 to 3 62)       | 3 38<br>(3 17 to 3 60)       | 3 47<br>(3 23 to 3 71)       | 3 54<br>(3 22 to 3 86)       | 3 05<br>(2 71 to 3 42)       | 2 42<br>(2 11 to 2 79)       |
| Niger                            | 37 06<br>(34 14 to 40 02)    | 41 77<br>(38 70 to 44 72)    | 45 49<br>(42 21 to 48 80)    | 49 96<br>(46 67 to 53 39)    | 53 51<br>(50 51 to 56 80)    | 56 44<br>(52 99 to 59 78)    | 55 20<br>(51 41 to 59 00)    | 50 44<br>(46 36 to 54 69)    | 46 06<br>(40 92 to 52 09)    | 43 28<br>(36 68 to 51 51)    |
| Nigeria                          | 321 66<br>(260 40 to 384 16) | 314 35<br>(256 54 to 371 36) | 313 39<br>(263 23 to 362 79) | 315 93<br>(271 94 to 362 19) | 348 25<br>(312 36 to 384 57) | 378 65<br>(329 42 to 427 20) | 401 35<br>(348 63 to 456 25) | 407 86<br>(352 02 to 469 61) | 394 01<br>(330 90 to 461 25) | 329 06<br>(266 96 to 392 27) |
| Sao Tome and Principe            | 0 21<br>(0 20 to 0 22)       | 0 18<br>(0 16 to 0 20)       | 0 19<br>(0 18 to 0 20)       | 0 23<br>(0 22 to 0 25)       | 0 21<br>(0 20 to 0 23)       | 0 20<br>(0 18 to 0 22)       | 0 18<br>(0 16 to 0 19)       | 0 15<br>(0 13 to 0 17)       | 0 11<br>(0 10 to 0 13)       | 0 09<br>(0 08 to 0 10)       |
| Senegal                          | 23 40<br>(21 24 to 25 75)    | 23 52<br>(21 59 to 25 53)    | 21 46<br>(19 72 to 23 32)    | 19 72<br>(18 00 to 21 42)    | 19 04<br>(17 57 to 20 62)    | 19 63<br>(18 41 to 20 91)    | 19 99<br>(16 81 to 19 24)    | 16 89<br>(15 43 to 18 53)    | 14 60<br>(13 04 to 16 09)    | 11 73<br>(10 04 to 13 65)    |
| Sierra Leone                     | 16 47<br>(14 48 to 18 75)    | 16 52<br>(14 75 to 18 41)    | 17 08<br>(15 64 to 18 58)    | 17 41<br>(16 38 to 18 51)    | 17 65<br>(16 75 to 18 65)    | 16 35<br>(15 50 to 17 20)    | 15 32<br>(14 49 to 16 18)    | 16 14<br>(14 96 to 17 29)    | 15 37<br>(13 99 to 16 78)    | 12 87<br>(11 30 to 14 62)    |
| Togo                             | 8 99<br>(7 58 to 10 41)      | 9 01<br>(7 55 to 10 40)      | 8 79<br>(7 19 to 10 42)      | 9 38<br>(7 94 to 10 83)      | 9 87<br>(8 69 to 11 12)      | 9 80<br>(8 53 to 11 31)      | 9 80<br>(8 22 to 11 44)      | 9 86<br>(7 55 to 12 32)      | 9 05<br>(7 09 to 11 01)      | 7 42<br>(5 85 to 9 06)       |
| Eastern Sub-Saharan Africa       | 494 08<br>(476 86 to 510 69) | 531 66<br>(512 96 to 549 67) | 560 89<br>(543 30 to 578 52) | 602 61<br>(586 32 to 619 39) | 619 39<br>(602 37 to 636 08) | 621 07<br>(600 98 to 641 70) | 592 86<br>(575 60 to 612 03) | 528 76<br>(510 93 to 546 71) | 463 81<br>(445 93 to 481 51) | 366 91<br>(346 46 to 388 75) |
| Burundi                          | 19 32<br>(16 46 to 22 11)    | 19 65<br>(17 40 to 22 17)    | 20 24<br>(17 85 to 22 79)    | 19 85<br>(17 84 to 22 02)    | 20 85<br>(18 63 to 23 24)    | 21 10<br>(18 87 to 23 63)    | 20 06<br>(17 60 to 22 42)    | 18 24<br>(15 96 to 20 71)    | 17 64<br>(14 73 to 20 83)    | 17 81<br>(12 74 to 25 24)    |
| Comoros                          | 0 80<br>(0 70 to 0 91)       | 0 82<br>(0 72 to 0 92)       | 0 89<br>(0 78 to 1 00)       | 0 86<br>(0 75 to 0 97)       | 0 81<br>(0 73 to 0 89)       | 0 77<br>(0 69 to 0 86)       | 0 81<br>(0 70 to 0 93)       | 0 75<br>(0 62 to 0 89)       | 0 66<br>(0 56 to 0 76)       | 0 47<br>(0 38 to 0 58)       |
| Djibouti                         | 0 49<br>(0 41 to 0 58)       | 0 62<br>(0 53 to 0 71)       | 0 89<br>(0 77 to 1 02)       | 1 09<br>(0 95 to 1 23)       | 1 39<br>(1 19 to 1 59)       | 1 54<br>(1 29 to 1 79)       | 1 52<br>(1 27 to 1 77)       | 1 33<br>(1 06 to 1 61)       | 1 12<br>(0 83 to 1 47)       | 0 78<br>(0 52 to 1 14)       |
| Eritrea                          | 8 30<br>(7 13 to 9 64)       | 8 49<br>(7 37 to 9 57)       | 8 77<br>(7 82 to 9 72)       | 8 96<br>(7 91 to 10 10)      | 8 61<br>(7 61 to 9 65)       | 6 18<br>(5 36 to 7 04)       | 5 19<br>(4 44 to 6 02)       | 5 22<br>(4 22 to 6 29)       | 5 02<br>(3 96 to 6 29)       | 3 65<br>(2 72 to 4 82)       |
| Ethiopia                         | 122 01<br>(112 52 to 131 68) | 138 59<br>(127 10 to 150 22) | 138 75<br>(127 69 to 149 67) | 144 13<br>(134 73 to 152 75) | 158 26<br>(148 28 to 168 57) | 159 37<br>(145 97 to 173 52) | 151 85<br>(139 56 to 166 85) | 126 75<br>(115 55 to 139 29) | 96 87<br>(87 31 to 107 43)   | 63 73<br>(56 28 to 72 81)    |
| Kenya                            | 35 09<br>(34 23 to 35 94)    | 36 82<br>(36 01 to 37 68)    | 37 34<br>(36 32 to 38 27)    | 38 60<br>(37 65 to 39 52)    | 40 85<br>(39 72 to 41 93)    | 46 06<br>(44 85 to 47 37)    | 46 38<br>(45 14 to 47 74)    | 41 39<br>(40 22 to 42 60)    | 33 54<br>(32 23 to 34 90)    | 26 21<br>(24 96 to 27 62)    |
| Madagascar                       | 25 20<br>(22 07 to 28 78)    | 27 62<br>(24 33 to 31 37)    | 31 30<br>(28 05 to 34 78)    | 36 55<br>(32 38 to 40 48)    | 35 59<br>(32 13 to 39 22)    | 36 60<br>(32 68 to 40 80)    | 35 79<br>(31 63 to 40 22)    | 34 03<br>(29 42 to 38 64)    | 35 16<br>(29 54 to 40 93)    | 32 20<br>(25 07 to 41 54)    |
| Malawi                           | 39 47<br>(35 39 to 43 74)    | 38 46<br>(34 94 to 42 13)    | 37 35<br>(34 20 to 40 74)    | 38 74<br>(35 63 to 42 21)    | 45 97<br>(42 39 to 49 68)    | 40 99<br>(37 83 to 44 55)    | 40 99<br>(34 22 to 40 95)    | 37 49<br>(27 86 to 33 78)    | 30 88<br>(24 88 to 32 66)    | 22 51<br>(18 27 to 28 36)    |
| Mozambique                       | 49 80<br>(42 31 to 58 26)    | 52 15<br>(44 93 to 59 65)    | 57 85<br>(50 13 to 65 50)    | 70 02<br>(61 71 to 78 21)    | 54 09<br>(46 01 to 61 68)    | 57 59<br>(49 89 to 65 24)    | 55 81<br>(50 23 to 61 58)    | 51 88<br>(47 01 to 56 93)    | 47 78<br>(41 94 to 53 40)    | 38 08<br>(31 45 to 45 44)    |
| Rwanda                           | 21 00<br>(19 04 to 22 95)    | 24 65<br>(22 49 to 27 10)    | 25 67<br>(23 30 to 28 35)    | 24 48<br>(22 31 to 26 95)    | 26 39<br>(23 97 to 29 05)    | 24 50<br>(21 62 to 27 45)    | 22 88<br>(20 01 to 25 93)    | 18 23<br>(15 83 to 20 62)    | 12 07<br>(10 48 to 13 72)    | 8 86<br>(7 21 to 10 88)      |
| Somalia                          | 10 44<br>(7 74 to 13 45)     | 13 65<br>(10 81 to 16 83)    | 16 64<br>(13 51 to 20 10)    | 18 71<br>(14 85 to 22 30)    | 17 31<br>(13 73 to 20 98)    | 15 88<br>(12 63 to 19 12)    | 15 53<br>(12 76 to 18 53)    | 14 49<br>(12 07 to 16 93)    | 17 88<br>(14 58 to 21 40)    | 12 91<br>(9 68 to 16 19)     |
| South Sudan                      | 24 97<br>(18 87 to 32 65)    | 25 83<br>(19 90 to 32 69)    | 27 32<br>(22 26 to 33 05)    | 29 95<br>(25 64 to 34 30)    | 28 97<br>(24 72 to 33 26)    | 23 21<br>(19 95 to 26 55)    | 22 27<br>(19 55 to 24 79)    | 23 18<br>(20 17 to 26 53)    | 25 10<br>(20 91 to 29 99)    | 28 09<br>(21 50 to 36 32)    |
| Tanzania                         | 73 08<br>(66 33 to 79 65)    | 75 82<br>(69 13 to 82 37)    | 78 93<br>(71 39 to 86 58)    | 82 99<br>(75 81 to 90 48)    | 85 93<br>(77 80 to 93 71)    | 90 43<br>(82 45 to 98 24)    | 83 28<br>(76 94 to 89 88)    | 74 45<br>(67 67 to 81 27)    | 64 30<br>(55 28 to 73 71)    | 50 37<br>(40 59 to 60 87)    |
| Uganda                           | 44 45<br>(41 10 to 47 59)    | 48 37<br>(45 46 to 51 48)    | 56 17<br>(52 76 to 59 79)    | 60 76<br>(57 60 to 64 12)    | 64 42<br>(61 14 to 67 72)    | 66 98<br>(63 51 to 70 64)    | 65 50<br>(62 57 to 68 58)    | 63 28<br>(59 90 to 66 84)    | 57 86<br>(53 48 to 62 46)    | 45 07<br>(39 79 to 51 24)    |
| Zambia                           | 19 47<br>(17 12 to 22 37)    | 19 92<br>(17 58 to 22 39)    | 22 54<br>(20 31 to 25 11)    | 26 64<br>(24 11 to 29 60)    | 29 64<br>(27 39 to 31 85)    | 29 54<br>(26 85 to 32 47)    | 28 13<br>(24 71 to 31 56)    | 24 34<br>(21 47 to 27 59)    | 19 91<br>(17 30 to 22 85)    | 15 98<br>(12 62 to 19 78)    |
| Central Sub-Saharan Africa       | 144 43<br>(94 74 to 192 02)  | 148 25<br>(97 96 to 199 30)  | 152 25<br>(104 94 to 194 65) | 151 98<br>(106 38 to 190 50) | 171 55<br>(118 57 to 215 73) | 189 98<br>(130 87 to 242 53) | 202 38<br>(140 32 to 257 06) | 197 66<br>(147 51 to 246 81) | 190 73<br>(133 32 to 249 70) | 160 78<br>(109 36 to 220 52) |
| Angola                           | 28 33<br>(20 03 to 38 21)    | 30 59<br>(23 13 to 38 83)    | 34 44<br>(27 73 to 42 43)    | 39 03<br>(32 88 to 45 69)    | 45 32<br>(38 49 to 52 50)    | 45 46<br>(38 59 to 53 04)    | 47 96<br>(40 82 to 55 83)    | 46 78<br>(37 78 to 52 90)    | 39 47<br>(31 83 to 48 33)    | 26 69<br>(17 67 to 38 33)    |
| Central African Republic         | 6 77<br>(5 56 to 8 13)       | 7 24<br>(6 03 to 8 60)       | 7 38<br>(6 25 to 8 76)       | 8 09<br>(6 79 to 9 45)       | 8 72<br>(7 49 to 10 08)      | 9 71<br>(8 21 to 11 56)      | 10 89<br>(9 05 to 13 01)     | 11 02<br>(8 88 to 13 46)     | 11 03<br>(8 52 to 13 95)     | 10 56<br>(7 57 to 14 53)     |
| Congo                            | 5 01<br>(3 87 to 6 25)       | 4 82<br>(3 77 to 5 98)       | 4 47<br>(3 60 to 5 41)       | 3 96<br>(3 33 to 4 63)       | 4 79<br>(3 47 to 6 49)       | 4 79<br>(4 15 to 5 49)       | 5 62<br>(4 91 to 6 39)       | 5 19<br>(4 51 to 5 91)       | 4 58<br>(3 79 to 5 54)       | 3 75<br>(2 91 to 4 89)       |
| Democratic Republic of the Congo | 101 05<br>(51 87 to 149 91)  | 103 15<br>(52 59 to 153 13)  | 104 03<br>(56 79 to 146 72)  | 98 68<br>(53 64 to 137 42)   | 110 84<br>(59 14 to 156 12)  | 127 34<br>(68 94 to 178 07)  | 135 64<br>(75 05 to 190 44)  | 134 59<br>(84 03 to 183 36)  | 133 77<br>(76 50 to 191 15)  | 118 26<br>(68 23 to 176 14)  |
| Equatorial Guinea                | 1 40<br>(1 06 to 1 78)       | 0 91<br>(0 74 to 1 09)       | 0 65<br>(0 54 to 0 78)       | 1 07<br>(0 85 to 1 31)       | 1 44<br>(1 17 to 1 78)       | 1 57<br>(1 30 to 1 88)       | 1 10<br>(0 87 to 1 37)       | 0 88<br>(0 65 to 1 16)       | 0 75<br>(0 54 to 1 04)       | 0 56<br>(0 38 to 0 81)       |
| Gabon                            | 1 87<br>(1 35 to 2 42)       | 1 53<br>(1 17 to 1 93)       | 1 28<br>(0 95 to 1 62)       | 1 15<br>(0 85 to 1 47)       | 1 14<br>(0 85 to 1 44)       | 1 12<br>(0 85 to 1 39)       | 1 16<br>(0 92 to 1 39)       | 1 22<br>(0 96 to 1 49)       | 1 45<br>(0 88 to 1 45)       | 0 96<br>(0 69 to 1 27)       |

Appendix Table 13A. Estimates of life expectancy at birth by location, both sexes combined, 1970, 1975, 1980, 1985, 1990, 1995, 2000, 2005, 2010, 2016

| Location                  | 1970                | 1975                | 1980                | 1985                | 1990                | 1995                | 2000                | 2005                | 2010                | 2016                |
|---------------------------|---------------------|---------------------|---------------------|---------------------|---------------------|---------------------|---------------------|---------------------|---------------------|---------------------|
| Global                    | 58.4<br>(57.9-58.9) | 60.4<br>(60.0-60.8) | 62.1<br>(61.8-62.4) | 63.7<br>(63.5-64.0) | 65.1<br>(64.9-65.3) | 65.7<br>(65.5-65.9) | 66.8<br>(66.6-67.0) | 68.4<br>(68.1-68.6) | 70.3<br>(70.0-70.6) | 72.5<br>(72.1-72.8) |
| High SDI                  | 70.9<br>(70.7-71.1) | 72.2<br>(72.1-72.4) | 73.6<br>(73.5-73.7) | 74.7<br>(74.7-74.8) | 75.8<br>(75.7-75.9) | 76.7<br>(76.6-76.7) | 77.9<br>(77.9-78.0) | 79.0<br>(78.9-79.1) | 80.1<br>(80.1-80.2) | 80.7<br>(80.6-80.9) |
| High-middle SDI           | 65.0<br>(64.5-65.6) | 66.7<br>(66.3-67.1) | 67.6<br>(67.1-68.0) | 69.0<br>(68.7-69.4) | 70.0<br>(69.6-70.3) | 69.3<br>(69.0-69.7) | 70.9<br>(70.5-71.2) | 72.2<br>(71.9-72.6) | 74.7<br>(74.4-74.9) | 76.4<br>(75.5-77.2) |
| Middle SDI                | 58.8<br>(58.1-59.5) | 61.5<br>(61.0-61.9) | 63.2<br>(62.8-63.6) | 65.1<br>(64.8-65.5) | 66.6<br>(66.4-66.9) | 67.9<br>(67.7-68.1) | 69.1<br>(69.0-69.3) | 70.6<br>(70.4-70.8) | 72.3<br>(72.1-72.5) | 74.2<br>(73.9-74.4) |
| Low-middle SDI            | 49.8<br>(49.0-50.6) | 52.3<br>(51.6-53.0) | 55.2<br>(54.7-55.7) | 57.2<br>(56.7-57.6) | 59.0<br>(58.6-59.4) | 60.1<br>(59.7-60.5) | 61.3<br>(61.0-61.7) | 63.1<br>(62.7-63.5) | 65.4<br>(65.0-65.8) | 67.8<br>(67.3-68.3) |
| Low SDI                   | 47.4<br>(46.3-48.6) | 48.9<br>(48.1-49.6) | 50.2<br>(49.6-50.8) | 51.2<br>(50.5-51.8) | 52.5<br>(52.0-52.9) | 53.0<br>(52.5-53.4) | 53.9<br>(53.5-54.4) | 56.5<br>(56.0-57.0) | 58.8<br>(57.9-59.6) | 63.0<br>(62.3-63.7) |
| High-income               | 70.7<br>(70.5-70.8) | 72.1<br>(72.0-72.2) | 73.8<br>(73.7-73.8) | 75.0<br>(74.9-75.1) | 76.0<br>(76.0-76.1) | 77.0<br>(76.9-77.0) | 78.2<br>(78.1-78.2) | 79.3<br>(79.2-79.3) | 80.3<br>(80.3-80.4) | 80.9<br>(80.8-81.1) |
| High-income North America | 70.9<br>(70.8-71.0) | 72.5<br>(72.4-72.6) | 74.0<br>(74.0-74.1) | 74.9<br>(74.8-75.0) | 75.6<br>(75.6-75.7) | 76.2<br>(76.1-76.2) | 77.2<br>(77.1-77.3) | 77.9<br>(77.9-78.0) | 79.0<br>(79.0-79.1) | 79.2<br>(79.0-79.3) |
| Canada                    | 72.6<br>(72.3-72.8) | 73.5<br>(73.3-73.8) | 75.2<br>(74.9-75.4) | 76.5<br>(76.2-76.7) | 77.4<br>(77.2-77.7) | 78.1<br>(77.9-78.3) | 79.3<br>(79.0-79.5) | 80.2<br>(80.0-80.4) | 81.3<br>(81.1-81.6) | 81.9<br>(81.5-82.2) |
| Greenland                 | 63.3<br>(62.4-64.1) | 62.0<br>(61.1-62.9) | 61.4<br>(60.6-62.3) | 60.8<br>(60.0-61.6) | 61.4<br>(60.3-62.4) | 64.0<br>(63.1-64.9) | 65.0<br>(64.2-65.9) | 66.0<br>(65.2-66.8) | 68.3<br>(67.4-69.3) | 70.0<br>(67.9-72.0) |
| United States             | 70.8<br>(70.7-70.9) | 72.4<br>(72.3-72.5) | 73.9<br>(73.8-74.0) | 74.8<br>(74.7-74.8) | 75.5<br>(75.4-75.5) | 76.0<br>(75.9-76.0) | 77.0<br>(76.9-77.0) | 77.7<br>(77.6-77.8) | 78.8<br>(78.7-78.8) | 78.9<br>(78.7-79.0) |
| Australasia               | 71.1<br>(71.0-71.3) | 72.5<br>(72.3-72.7) | 74.2<br>(74.1-74.4) | 75.4<br>(75.2-75.5) | 76.8<br>(76.6-77.0) | 78.1<br>(77.9-78.2) | 79.5<br>(79.4-79.7) | 80.9<br>(80.7-81.0) | 81.8<br>(81.7-82.0) | 82.4<br>(81.9-82.8) |
| Australia                 | 71.1<br>(70.8-71.3) | 72.6<br>(72.4-72.8) | 74.5<br>(74.3-74.7) | 75.6<br>(75.4-75.8) | 77.0<br>(76.8-77.2) | 78.3<br>(78.1-78.5) | 79.7<br>(79.5-79.9) | 81.1<br>(80.9-81.3) | 82.0<br>(81.8-82.2) | 82.5<br>(82.0-83.0) |
| New Zealand               | 71.4<br>(71.2-71.7) | 72.1<br>(71.8-72.4) | 73.1<br>(72.9-73.4) | 74.1<br>(73.8-74.3) | 75.6<br>(75.4-75.9) | 77.0<br>(76.7-77.3) | 78.6<br>(78.3-78.8) | 79.9<br>(79.7-80.1) | 80.9<br>(80.7-81.2) | 81.5<br>(80.6-82.3) |
| High-income Asia Pacific  | 69.7<br>(68.7-70.5) | 72.0<br>(71.3-72.6) | 74.2<br>(73.8-74.5) | 76.0<br>(75.7-76.3) | 77.4<br>(77.2-77.7) | 78.6<br>(78.3-78.9) | 80.0<br>(79.8-80.2) | 81.3<br>(81.1-81.5) | 82.4<br>(82.2-82.6) | 83.3<br>(82.6-83.9) |
| Brunei                    | 65.6<br>(64.4-66.9) | 69.2<br>(68.0-70.4) | 69.8<br>(68.2-71.8) | 72.0<br>(71.1-72.9) | 73.3<br>(72.5-74.2) | 74.2<br>(73.3-75.1) | 75.8<br>(75.1-76.5) | 76.6<br>(76.1-77.2) | 77.0<br>(76.3-77.6) | 76.9<br>(75.5-78.6) |
| Japan                     | 72.3<br>(72.0-72.6) | 74.3<br>(74.1-74.5) | 76.2<br>(76.2-76.3) | 77.8<br>(77.7-77.8) | 78.9<br>(78.9-79.0) | 79.8<br>(79.6-79.9) | 81.0<br>(81.0-81.1) | 82.0<br>(82.0-82.1) | 82.9<br>(82.9-82.9) | 83.9<br>(83.8-84.1) |
| Singapore                 | 61.8<br>(61.2-62.6) | 64.1<br>(63.1-65.1) | 67.3<br>(66.1-68.5) | 69.7<br>(68.4-71.4) | 72.4<br>(71.3-73.5) | 74.2<br>(73.3-75.1) | 76.0<br>(75.1-76.9) | 77.4<br>(76.5-78.3) | 78.2<br>(77.3-79.1) | 79.0<br>(78.1-80.0) |
| South Korea               | 61.8<br>(58.2-65.8) | 64.1<br>(61.6-66.7) | 67.3<br>(66.1-68.6) | 69.7<br>(68.5-71.0) | 72.4<br>(70.9-73.1) | 74.2<br>(73.1-75.3) | 76.0<br>(75.2-77.0) | 77.4<br>(77.6-79.3) | 78.2<br>(79.4-81.2) | 79.0<br>(78.5-83.6) |
| Western Europe            | 70.6<br>(71.5-71.7) | 72.6<br>(72.5-72.8) | 74.0<br>(73.9-74.1) | 75.2<br>(75.1-75.3) | 76.3<br>(76.2-76.4) | 77.3<br>(77.2-77.4) | 78.6<br>(78.5-78.7) | 79.9<br>(79.7-79.9) | 81.5<br>(80.8-81.0) | 82.5<br>(81.5-81.9) |
| Andorra                   | 70.2<br>(73.3-78.7) | 71.4<br>(75.2-80.0) | 72.7<br>(76.8-80.9) | 74.1<br>(77.3-81.2) | 75.7<br>(78.1-81.5) | 76.8<br>(78.7-82.2) | 78.3<br>(80.4-83.4) | 79.6<br>(81.2-83.7) | 80.6<br>(81.4-84.0) | 81.5<br>(80.9-84.1) |
| Austria                   | 70.9<br>(70.0-70.4) | 72.0<br>(71.2-71.6) | 73.2<br>(72.5-72.9) | 74.5<br>(73.8-74.3) | 75.6<br>(75.5-75.9) | 76.9<br>(76.7-77.0) | 77.8<br>(78.1-78.5) | 79.2<br>(79.4-79.8) | 80.0<br>(80.4-80.8) | 80.9<br>(81.0-82.0) |
| Belgium                   | 70.3<br>(70.6-71.2) | 71.1<br>(71.7-72.4) | 72.8<br>(72.9-73.5) | 74.0<br>(74.2-74.8) | 74.9<br>(75.7-76.3) | 75.7<br>(76.6-77.2) | 76.8<br>(77.5-78.2) | 78.0<br>(78.9-79.5) | 79.0<br>(79.7-80.3) | 80.5<br>(80.1-81.8) |
| Cyprus                    | 73.3<br>(69.7-70.8) | 74.1<br>(70.7-71.5) | 74.3<br>(72.5-73.2) | 74.7<br>(73.7-74.4) | 75.2<br>(74.6-75.3) | 75.6<br>(75.3-76.0) | 76.0<br>(76.5-77.2) | 77.0<br>(77.7-78.4) | 78.1<br>(79.5-80.2) | 80.8<br>(80.0-80.9) |
| Denmark                   | 70.1<br>(72.8-73.9) | 71.7<br>(73.6-74.6) | 73.6<br>(73.7-74.9) | 74.6<br>(74.2-75.3) | 75.1<br>(74.6-75.8) | 76.7<br>(75.1-76.2) | 77.8<br>(76.4-77.5) | 78.0<br>(77.5-78.7) | 80.0<br>(79.0-80.0) | 81.7<br>(79.8-81.8) |
| Finland                   | 70.8<br>(69.8-70.4) | 73.2<br>(71.4-72.0) | 74.6<br>(73.4-73.9) | 75.8<br>(74.3-74.9) | 77.2<br>(74.8-75.3) | 78.1<br>(74.8-75.3) | 79.1<br>(76.5-77.0) | 80.4<br>(77.6-78.0) | 81.5<br>(78.7-79.2) | 82.3<br>(81.1-82.4) |
| France                    | 70.8<br>(72.2-72.7) | 71.7<br>(72.9-73.5) | 73.2<br>(74.3-74.8) | 74.5<br>(75.6-76.1) | 75.5<br>(76.9-77.4) | 76.6<br>(77.9-78.4) | 78.0<br>(78.9-79.4) | 79.2<br>(80.2-80.6) | 80.1<br>(81.3-81.7) | 80.9<br>(81.9-82.8) |
| Germany                   | 73.5<br>(70.3-71.2) | 74.6<br>(71.3-72.1) | 77.1<br>(72.7-73.6) | 77.6<br>(74.0-74.9) | 77.0<br>(75.0-75.9) | 77.0<br>(76.2-77.1) | 78.6<br>(77.6-78.4) | 79.6<br>(78.9-79.7) | 80.4<br>(79.8-80.6) | 81.0<br>(80.2-81.6) |
| Greece                    | 73.8<br>(73.4-73.7) | 75.1<br>(74.4-74.8) | 76.6<br>(76.9-77.4) | 77.3<br>(76.0-76.5) | 78.0<br>(76.7-77.2) | 78.5<br>(77.5-78.0) | 79.9<br>(78.4-78.9) | 81.2<br>(79.4-79.8) | 82.0<br>(80.2-80.6) | 82.5<br>(80.3-81.6) |
| Iceland                   | 71.0<br>(73.4-74.2) | 71.6<br>(74.7-75.5) | 72.5<br>(76.2-77.1) | 73.7<br>(76.9-77.7) | 74.8<br>(77.6-78.5) | 75.8<br>(78.0-79.0) | 76.6<br>(79.5-80.3) | 77.8<br>(80.8-81.6) | 78.9<br>(81.7-82.4) | 80.4<br>(81.6-83.0) |
| Ireland                   | 69.5<br>(70.6-71.5) | 71.5<br>(71.1-72.0) | 73.6<br>(72.0-73.0) | 74.5<br>(73.3-74.2) | 75.5<br>(74.4-75.3) | 76.2<br>(75.3-76.2) | 77.0<br>(76.1-77.1) | 78.5<br>(78.5-79.4) | 79.7<br>(80.0-80.8) | 81.5<br>(80.0-82.2) |
| Israel                    | 71.6<br>(68.0-71.0) | 72.8<br>(70.7-72.4) | 74.1<br>(72.7-74.6) | 75.7<br>(73.6-75.4) | 77.0<br>(75.0-76.6) | 78.1<br>(76.2-78.0) | 79.6<br>(77.6-79.5) | 80.9<br>(78.9-80.5) | 81.8<br>(80.7-82.2) | 82.3<br>(80.6-83.6) |
| Italy                     | 69.9<br>(69.6-70.3) | 71.2<br>(70.8-71.5) | 72.6<br>(71.8-72.5) | 73.9<br>(73.5-74.2) | 75.2<br>(74.8-75.5) | 76.8<br>(76.5-77.2) | 78.5<br>(78.2-78.9) | 80.0<br>(79.7-80.0) | 81.4<br>(81.1-81.8) | 82.7<br>(81.3-83.0) |
| Luxembourg                | 69.5<br>(68.7-70.3) | 70.7<br>(70.0-71.5) | 71.6<br>(70.8-72.3) | 73.6<br>(72.9-74.3) | 75.8<br>(75.0-76.5) | 77.1<br>(76.4-77.9) | 77.5<br>(76.8-78.2) | 79.3<br>(79.6-80.0) | 80.3<br>(79.6-81.0) | 81.4<br>(80.4-82.9) |
| Malta                     | 73.7<br>(73.3-74.1) | 74.6<br>(74.3-75.0) | 75.8<br>(75.4-76.2) | 76.4<br>(76.0-76.7) | 77.0<br>(76.7-77.4) | 77.5<br>(77.2-77.9) | 78.1<br>(77.8-78.5) | 79.5<br>(79.2-79.8) | 80.8<br>(80.5-81.1) | 81.6<br>(80.9-82.3) |
| Netherlands               | 74.0<br>(73.6-74.3) | 74.8<br>(74.4-75.1) | 75.7<br>(75.3-76.1) | 76.1<br>(75.7-76.5) | 76.8<br>(76.4-77.2) | 77.9<br>(77.6-78.3) | 78.7<br>(78.4-79.1) | 80.2<br>(79.8-80.5) | 81.1<br>(80.7-81.4) | 82.1<br>(81.3-82.9) |
| Norway                    | 67.5<br>(67.2-67.7) | 69.8<br>(69.5-70.1) | 71.7<br>(71.4-71.9) | 73.2<br>(73.0-73.5) | 74.3<br>(74.0-74.6) | 75.3<br>(75.0-75.6) | 76.7<br>(76.5-77.0) | 78.4<br>(78.1-78.7) | 79.9<br>(79.6-80.2) | 81.0<br>(80.4-81.6) |
| Portugal                  | 72.0<br>(71.8-72.1) | 73.5<br>(73.3-73.7) | 75.4<br>(75.3-75.6) | 76.5<br>(76.3-76.6) | 77.7<br>(77.6-77.3) | 78.1<br>(78.0-78.3) | 79.4<br>(79.2-79.6) | 80.5<br>(80.3-80.6) | 82.0<br>(81.8-82.1) | 83.0<br>(82.6-83.3) |
| Spain                     | 74.5<br>(74.0-75.1) | 75.0<br>(74.5-75.4) | 75.8<br>(75.5-76.1) | 76.9<br>(76.6-77.2) | 77.6<br>(77.4-77.9) | 78.9<br>(78.6-79.1) | 79.7<br>(79.5-80.0) | 80.5<br>(80.3-80.8) | 81.5<br>(81.3-81.8) | 82.0<br>(81.1-83.0) |
| Sweden                    | 74.1<br>(72.2-76.1) | 74.6<br>(73.1-76.0) | 75.5<br>(75.0-76.1) | 76.8<br>(76.3-77.3) | 77.3<br>(76.8-77.8) | 78.7<br>(78.3-79.2) | 79.7<br>(79.3-80.1) | 80.8<br>(80.4-81.2) | 81.9<br>(81.5-82.3) | 82.3<br>(80.6-83.9) |
| Sweden except Stockholm   | 74.6<br>(74.1-75.1) | 75.1<br>(74.6-75.5) | 75.8<br>(75.5-76.2) | 76.9<br>(76.5-77.2) | 77.7<br>(77.4-78.0) | 78.9<br>(78.6-79.2) | 79.7<br>(79.4-80.0) | 80.5<br>(80.2-80.8) | 81.5<br>(81.2-81.7) | 82.0<br>(80.9-83.1) |
| Switzerland               | 73.0<br>(72.5-73.6) | 74.7<br>(74.2-75.3) | 75.7<br>(75.1-76.2) | 76.9<br>(76.4-77.5) | 77.5<br>(77.0-78.0) | 78.5<br>(78.0-79.0) | 80.0<br>(79.4-80.5) | 81.3<br>(80.8-81.7) | 82.3<br>(81.8-82.8) | 83.2<br>(81.3-84.9) |
| United Kingdom            | 71.9<br>(71.7-72.0) | 72.5<br>(72.4-72.7) | 73.6<br>(73.5-73.7) | 74.6<br>(74.5-74.7) | 75.7<br>(75.6-75.8) | 76.7<br>(76.6-76.8) | 77.8<br>(77.7-77.9) | 79.1<br>(79.0-79.2) | 80.4<br>(80.3-80.5) | 80.9<br>(80.7-81.0) |
| England                   | 72.2<br>(72.0-72.3) | 72.8<br>(72.7-72.9) | 73.8<br>(73.7-73.9) | 74.9<br>(74.8-74.9) | 76.0<br>(75.9-76.0) | 76.9<br>(76.9-77.0) | 78.1<br>(78.0-78.2) | 79.4<br>(79.3-79.4) | 80.7<br>(80.6-80.7) | 81.2<br>(81.1-81.3) |
| East Midlands             | 73.1<br>(71.4-72.5) | 73.9<br>(72.2-73.2) | 74.9<br>(73.4-74.2) | 75.8<br>(74.6-75.1) | 77.0<br>(75.7-76.1) | 78.0<br>(76.7-77.2) | 79.0<br>(77.8-78.3) | 80.3<br>(79.0-79.5) | 81.5<br>(80.3-80.7) | 81.9<br>(80.6-81.3) |
| East of England           | 72.6<br>(72.6-73.7) | 73.1<br>(73.4-74.3) | 74.0<br>(74.6-75.3) | 75.0<br>(75.6-76.1) | 76.0<br>(76.8-77.3) | 76.8<br>(77.7-78.2) | 78.0<br>(78.8-79.2) | 79.5<br>(80.0-80.5) | 81.1<br>(81.2-81.7) | 81.8<br>(81.6-82.3) |
| Greater London            | 70.6<br>(72.3-72.8) | 71.4<br>(72.8-73.4) | 72.4<br>(73.8-74.2) | 73.4<br>(74.8-75.2) | 74.4<br>(76.0-76.1) | 75.4<br>(76.6-76.9) | 76.7<br>(78.0-78.1) | 77.9<br>(79.3-79.6) | 79.3<br>(81.0-81.3) | 79.8<br>(81.6-82.0) |
| North East England        | 70.9<br>(70.1-71.1) | 71.6<br>(71.0-71.8) | 72.6<br>(72.1-72.7) | 73.7<br>(73.1-73.6) | 74.7<br>(74.2-74.7) | 75.7<br>(75.2-75.6) | 76.8<br>(76.5-76.9) | 78.0<br>(77.7-78.1) | 79.3<br>(79.0-79.5) | 79.9<br>(79.4-80.1) |
| North West England        | 70.5<br>(70.5-71.4) | 71.5<br>(71.1-72.0) | 72.4<br>(72.4-72.9) | 73.5<br>(73.5-73.9) | 74.5<br>(74.5-74.9) | 75.5<br>(75.5-75.8) | 76.8<br>(76.6-77.0) | 78.2<br>(77.9-78.2) | 80.4<br>(79.2-79.5) | 82.1<br>(79.2-80.2) |
| South East England        | 73.3<br>(73.0-73.9) | 73.9<br>(73.7-74.5) | 74.9<br>(74.8-75.3) | 75.9<br>(75.7-76.2) | 77.0<br>(76.9-77.3) | 78.1<br>(77.8-78.2) | 79.2<br>(79.0-79.4) | 80.6<br>(80.2-80.6) | 81.5<br>(81.5-81.8) | 81.9<br>(81.8-82.4) |
| South West England        | 71.6<br>(72.8-73.7) | 72.3<br>(73.6-74.3) | 73.3<br>(74.7-75.2) | 74.3<br>(75.8-76.2) | 75.3<br>(77.0-77.3) | 76.3<br>(77.9-78.3) | 77.6<br>(79.0-79.4) | 78.8<br>(80.2-80.6) | 80.2<br>(81.4-81.7) | 80.7<br>(81.6-82.2) |
| West Midlands             | 71.4<br>(71.1-72.1) | 72.0<br>(71.9-72.8) | 73.1<br>(73.0-73.6) | 74.1<br>(74.0-74.5) | 75.4<br>(75.2-75.7) | 76.4<br>(76.3-76.8) | 77.5<br>(77.3-77.8) | 78.8<br>(78.6-79.0) | 79.9<br>(80.0-80.4) | 80.4<br>(80.3-81.0) |
| Yorkshire and the Humber  | 70.8<br>(70.9-71.8) | 71.0<br>(71.7-72.4) | 72.1<br>(72.8-73.4) | 73.5<br>(73.9-74.3) | 74.9<br>(75.2-75.6) | 76.6<br>(76.2-76.6) | 77.4<br>(77.3-77.7) | 78.6<br>(78.6-78.9) | 79.6<br>(79.7-80.1) | 80.7<br>(80.1-80.7) |
| Northern Ireland          | 70.5<br>(70.2-71.3) | 71.0<br>(70.4-71.5) | 72.1<br>(71.6-72.7) | 72.9<br>(72.8-74.2) | 73.9<br>(74.2-75.7) | 74.8<br>(75.5-76.9) | 76.0<br>(76.7-78.1) | 77.1<br>(77.9-79.2) | 78.4<br>(79.0-80.2) | 79.1<br>(79.1-81.4) |
| Scotland                  | 70.5<br>(70.0-70.9) | 71.5<br>(70.5-71.5) | 72.6<br>(71.7-72.6) | 73.6<br>(72.3-73.6) | 74.6<br>(73.3-74.6) | 75                  |                     |                     |                     |                     |



Appendix Table 13A. Estimates of life expectancy at birth by location, both sexes combined, 1970, 1975, 1980, 1985, 1990, 1995, 2000, 2005, 2010, 2016

| Location                                         | 1970                | 1975                | 1980                | 1985                | 1990                | 1995                | 2000                | 2005                | 2010                | 2016                |
|--------------------------------------------------|---------------------|---------------------|---------------------|---------------------|---------------------|---------------------|---------------------|---------------------|---------------------|---------------------|
| Wales                                            | 71.2<br>(69.6-73.8) | 71.9<br>(70.6-73.3) | 73.1<br>(72.2-74.1) | 74.4<br>(73.7-75.0) | 75.5<br>(74.9-76.1) | 76.3<br>(75.8-77.0) | 77.4<br>(76.9-78.1) | 78.8<br>(78.2-79.4) | 79.7<br>(79.1-80.3) | 80.1<br>(79.4-81.1) |
| Southern Latin America                           | 64.9<br>(64.5-65.2) | 67.2<br>(66.8-67.7) | 69.9<br>(69.5-70.2) | 71.5<br>(71.2-71.8) | 72.5<br>(72.2-72.8) | 73.7<br>(73.4-74.0) | 75.0<br>(74.7-75.2) | 76.0<br>(75.7-76.3) | 76.7<br>(76.5-77.0) | 77.7<br>(76.9-78.4) |
| Argentina                                        | 65.1<br>(64.4-65.6) | 67.2<br>(66.5-67.8) | 69.7<br>(69.3-70.1) | 71.2<br>(70.9-71.6) | 72.1<br>(71.7-72.5) | 73.1<br>(72.7-73.5) | 74.2<br>(73.8-74.5) | 75.2<br>(74.8-75.6) | 75.9<br>(75.5-76.2) | 76.7<br>(76.0-77.5) |
| Chile                                            | 63.4<br>(62.8-64.0) | 67.2<br>(66.5-67.8) | 70.2<br>(69.6-70.9) | 72.1<br>(71.5-72.7) | 73.5<br>(72.9-74.1) | 75.4<br>(74.8-76.0) | 77.3<br>(76.7-77.8) | 78.4<br>(77.9-79.0) | 79.2<br>(78.7-79.8) | 80.3<br>(78.1-82.5) |
| Uruguay                                          | 68.4<br>(68.1-68.7) | 68.6<br>(68.3-69.0) | 70.1<br>(69.7-70.4) | 71.6<br>(71.3-71.9) | 72.7<br>(72.4-73.1) | 73.5<br>(73.2-73.8) | 74.8<br>(74.5-75.1) | 75.6<br>(75.4-75.9) | 76.4<br>(76.1-76.8) | 77.3<br>(76.7-78.0) |
| Central Europe, Eastern Europe, and Central Asia | 67.7<br>(67.0-68.2) | 68.2<br>(67.7-68.6) | 68.0<br>(67.5-68.4) | 68.6<br>(68.2-69.0) | 69.2<br>(68.8-69.6) | 66.3<br>(65.8-66.9) | 67.6<br>(67.1-68.1) | 68.2<br>(67.7-68.8) | 71.0<br>(70.4-71.5) | 72.7<br>(71.1-74.2) |
| Eastern Europe                                   | 69.1<br>(68.4-69.8) | 68.7<br>(67.9-69.4) | 68.0<br>(67.2-68.7) | 68.7<br>(68.0-69.3) | 69.5<br>(68.7-70.2) | 65.1<br>(64.2-66.0) | 66.1<br>(65.2-67.0) | 66.3<br>(65.4-67.2) | 69.7<br>(68.9-70.5) | 71.4<br>(68.7-74.0) |
| Belarus                                          | 71.3<br>(70.6-72.0) | 71.6<br>(70.9-72.2) | 70.8<br>(70.2-71.3) | 70.7<br>(70.2-71.3) | 70.7<br>(70.2-71.3) | 68.2<br>(67.7-68.8) | 68.3<br>(67.7-68.9) | 68.7<br>(68.1-69.3) | 70.3<br>(69.8-70.9) | 73.6<br>(71.9-75.6) |
| Estonia                                          | 70.6<br>(70.1-71.0) | 70.2<br>(69.7-70.6) | 69.5<br>(69.1-70.0) | 69.7<br>(69.3-70.2) | 70.2<br>(69.7-70.6) | 67.7<br>(67.2-68.2) | 70.8<br>(70.4-71.3) | 72.9<br>(72.5-73.4) | 76.2<br>(75.8-76.7) | 77.6<br>(76.5-78.8) |
| Latvia                                           | 70.4<br>(69.9-70.9) | 69.3<br>(68.7-69.8) | 69.1<br>(68.6-69.7) | 69.7<br>(69.2-70.2) | 69.6<br>(69.1-70.2) | 66.4<br>(65.9-67.1) | 70.5<br>(69.9-71.1) | 70.8<br>(70.3-71.4) | 73.2<br>(72.7-73.7) | 75.1<br>(73.8-76.4) |
| Lithuania                                        | 71.3<br>(70.9-71.7) | 71.2<br>(70.8-71.6) | 70.8<br>(70.4-71.2) | 70.9<br>(70.5-71.3) | 71.5<br>(71.1-71.9) | 68.9<br>(68.5-69.4) | 72.1<br>(71.7-72.5) | 71.3<br>(70.9-71.8) | 73.2<br>(72.8-73.7) | 75.2<br>(74.3-76.0) |
| Moldova                                          | 62.7<br>(59.7-65.7) | 64.0<br>(61.5-66.5) | 65.0<br>(63.4-66.5) | 65.5<br>(64.4-66.6) | 67.3<br>(66.3-68.2) | 64.6<br>(63.6-65.5) | 67.6<br>(66.7-68.5) | 68.6<br>(67.7-69.5) | 69.7<br>(68.7-70.6) | 72.2<br>(71.0-73.5) |
| Russia                                           | 68.9<br>(68.4-69.9) | 68.3<br>(67.3-69.2) | 67.4<br>(66.3-68.5) | 68.2<br>(67.2-69.1) | 69.2<br>(68.1-70.3) | 64.3<br>(63.0-65.7) | 65.3<br>(64.1-66.5) | 65.6<br>(64.4-66.9) | 69.2<br>(68.1-70.4) | 70.9<br>(67.1-74.5) |
| Ukraine                                          | 69.5<br>(68.1-70.6) | 69.5<br>(68.4-70.5) | 69.0<br>(68.1-69.8) | 69.7<br>(69.1-70.3) | 70.1<br>(69.5-70.7) | 66.5<br>(65.8-67.3) | 67.4<br>(66.6-68.1) | 67.1<br>(66.4-67.8) | 70.5<br>(69.8-71.1) | 72.1<br>(69.4-74.7) |
| Central Europe                                   | 69.1<br>(68.7-69.4) | 70.2<br>(69.9-70.4) | 70.2<br>(70.0-70.4) | 70.5<br>(70.3-70.7) | 70.9<br>(70.8-71.1) | 71.1<br>(70.9-71.3) | 72.9<br>(72.7-73.0) | 74.1<br>(73.9-74.3) | 75.4<br>(75.3-75.6) | 76.9<br>(76.5-77.2) |
| Albania                                          | 67.4<br>(63.7-70.2) | 70.3<br>(67.7-72.3) | 72.2<br>(67.6-73.7) | 72.9<br>(72.1-73.7) | 73.7<br>(73.5-74.3) | 74.1<br>(73.5-74.5) | 74.3<br>(73.8-74.7) | 74.8<br>(74.3-75.2) | 76.2<br>(75.5-76.8) | 77.6<br>(76.5-78.8) |
| Bosnia and Herzegovina                           | 66.5<br>(63.9-68.8) | 68.1<br>(66.0-70.1) | 69.6<br>(68.0-71.3) | 71.0<br>(69.7-72.3) | 72.1<br>(71.0-73.3) | 68.7<br>(67.3-70.0) | 74.9<br>(74.7-76.0) | 75.8<br>(74.7-76.8) | 76.8<br>(75.7-77.8) | 77.6<br>(76.2-79.0) |
| Bulgaria                                         | 68.0<br>(70.7-71.3) | 69.4<br>(70.9-71.5) | 70.5<br>(70.9-71.5) | 71.1<br>(70.9-71.5) | 72.2<br>(71.1-71.7) | 72.3<br>(70.5-72.1) | 73.9<br>(71.3-72.0) | 75.1<br>(72.3-72.9) | 76.4<br>(73.5-74.1) | 77.4<br>(73.5-76.6) |
| Croatia                                          | 69.6<br>(65.4-70.4) | 70.4<br>(67.0-71.7) | 70.6<br>(68.4-72.5) | 71.1<br>(70.1-72.0) | 71.8<br>(71.5-73.0) | 73.4<br>(71.3-73.2) | 75.0<br>(73.3-74.6) | 76.2<br>(74.5-75.8) | 77.5<br>(75.7-76.9) | 79.1<br>(76.2-78.6) |
| Czech Republic                                   | 69.2<br>(69.4-69.9) | 69.4<br>(70.2-70.6) | 69.3<br>(70.4-70.8) | 69.1<br>(70.9-71.3) | 69.5<br>(71.6-72.0) | 70.1<br>(73.1-73.6) | 71.8<br>(74.8-75.3) | 73.1<br>(76.0-76.4) | 74.6<br>(77.3-77.7) | 75.7<br>(78.6-79.6) |
| Hungary                                          | 67.4<br>(68.7-69.6) | 68.8<br>(68.9-70.0) | 69.3<br>(68.8-69.8) | 70.1<br>(68.5-69.6) | 70.5<br>(69.0-70.1) | 71.1<br>(69.5-70.6) | 72.2<br>(71.2-72.3) | 72.9<br>(72.6-73.7) | 74.1<br>(74.1-75.1) | 74.8<br>(74.7-76.8) |
| Macedonia                                        | 72.7<br>(64.1-69.7) | 73.4<br>(66.2-70.7) | 74.2<br>(67.7-70.7) | 74.4<br>(68.9-71.2) | 75.0<br>(69.9-71.1) | 74.0<br>(70.6-71.6) | 73.8<br>(71.7-72.7) | 75.0<br>(72.4-73.4) | 76.4<br>(73.5-74.4) | 77.0<br>(74.2-77.5) |
| Montenegro                                       | 69.9<br>(71.2-74.0) | 70.8<br>(72.0-74.7) | 70.4<br>(73.0-75.3) | 70.7<br>(73.3-75.3) | 70.9<br>(74.2-75.9) | 71.8<br>(73.3-74.6) | 73.8<br>(73.3-74.4) | 75.2<br>(74.5-75.5) | 76.3<br>(75.7-77.1) | 77.9<br>(76.2-78.0) |
| Poland                                           | 68.4<br>(69.7-70.2) | 70.1<br>(70.5-71.2) | 69.7<br>(70.0-70.7) | 69.8<br>(70.3-71.0) | 69.8<br>(70.6-71.3) | 69.3<br>(71.5-72.2) | 71.1<br>(73.4-74.1) | 72.4<br>(74.8-75.6) | 73.6<br>(76.0-76.6) | 75.2<br>(77.1-78.8) |
| Romania                                          | 70.0<br>(68.0-68.8) | 71.1<br>(69.7-70.5) | 72.1<br>(69.2-70.1) | 72.6<br>(69.4-70.3) | 73.6<br>(69.3-70.3) | 70.7<br>(68.8-69.7) | 72.1<br>(70.6-71.6) | 73.2<br>(71.9-72.8) | 74.6<br>(73.1-74.1) | 76.9<br>(74.2-76.2) |
| Serbia                                           | 69.8<br>(68.4-71.4) | 70.3<br>(69.6-72.4) | 70.5<br>(70.4-72.9) | 70.7<br>(70.9-73.2) | 71.0<br>(71.7-73.5) | 72.4<br>(70.1-71.3) | 73.3<br>(71.6-72.8) | 74.2<br>(72.7-73.8) | 75.6<br>(74.2-75.1) | 76.6<br>(75.4-76.5) |
| Slovakia                                         | 68.0<br>(69.3-70.2) | 69.4<br>(69.9-70.7) | 70.5<br>(70.0-70.9) | 71.7<br>(70.3-71.2) | 73.6<br>(70.5-71.4) | 74.6<br>(72.0-72.8) | 76.0<br>(72.8-73.7) | 77.6<br>(73.8-74.6) | 79.5<br>(75.2-75.9) | 80.8<br>(75.9-78.0) |
| Slovenia                                         | 62.1<br>(65.1-71.0) | 64.2<br>(66.8-71.8) | 65.7<br>(69.0-72.1) | 67.3<br>(71.0-72.6) | 68.0<br>(72.9-74.4) | 65.2<br>(73.8-75.3) | 66.1<br>(75.3-76.8) | 66.0<br>(76.9-78.4) | 69.0<br>(78.9-80.1) | 71.3<br>(79.8-82.1) |
| Central Asia                                     | 65.6<br>(60.6-63.8) | 68.1<br>(62.9-65.3) | 69.8<br>(64.9-66.4) | 70.8<br>(66.3-67.4) | 70.3<br>(66.8-67.7) | 69.3<br>(64.7-65.8) | 72.0<br>(65.6-66.6) | 73.5<br>(66.1-67.4) | 75.9<br>(68.4-69.6) | 79.3<br>(70.4-72.2) |
| Armenia                                          | 61.4<br>(62.5-68.5) | 64.6<br>(65.9-70.5) | 65.7<br>(68.4-71.1) | 67.0<br>(70.0-71.6) | 67.9<br>(69.6-71.0) | 66.3<br>(68.5-70.1) | 69.5<br>(71.3-72.7) | 70.1<br>(71.8-73.2) | 71.8<br>(72.6-73.9) | 72.9<br>(74.8-76.9) |
| Azerbaijan                                       | 64.4<br>(58.0-64.6) | 67.1<br>(61.9-67.2) | 69.2<br>(63.9-67.5) | 70.0<br>(64.9-67.3) | 69.7<br>(65.1-67.5) | 70.6<br>(65.6-66.0) | 71.8<br>(65.4-67.5) | 72.8<br>(66.5-68.8) | 73.9<br>(67.9-70.3) | 74.9<br>(70.1-74.0) |
| Georgia                                          | 64.0<br>(61.3-67.5) | 65.1<br>(64.3-69.6) | 66.2<br>(67.8-70.8) | 67.6<br>(69.0-70.9) | 67.9<br>(68.8-70.6) | 69.1<br>(69.7-71.4) | 70.7<br>(70.9-72.7) | 71.8<br>(71.3-72.9) | 72.8<br>(71.9-73.6) | 73.9<br>(72.0-75.7) |
| Kazakhstan                                       | 59.7<br>(60.9-67.6) | 62.1<br>(62.0-68.5) | 64.1<br>(64.3-68.2) | 65.4<br>(66.4-68.9) | 66.0<br>(66.9-69.1) | 66.0<br>(63.0-65.5) | 66.3<br>(63.2-65.6) | 66.5<br>(63.5-66.0) | 68.4<br>(67.2-69.5) | 71.2<br>(69.7-73.7) |
| Kyrgyzstan                                       | 54.5<br>(57.5-62.3) | 58.0<br>(59.9-64.2) | 58.9<br>(62.9-65.2) | 60.8<br>(64.8-66.0) | 62.4<br>(65.5-66.6) | 61.6<br>(65.7-66.9) | 62.7<br>(65.7-66.9) | 63.7<br>(66.4-67.0) | 66.0<br>(69.8-68.9) | 68.1<br>(70.2-72.3) |
| Mongolia                                         | 56.4<br>(52.5-56.6) | 58.6<br>(56.3-59.8) | 61.8<br>(57.4-60.2) | 63.8<br>(59.6-62.2) | 65.0<br>(61.3-63.6) | 63.8<br>(60.6-62.7) | 65.2<br>(61.8-63.7) | 67.3<br>(62.7-64.7) | 69.5<br>(64.6-67.2) | 71.8<br>(66.5-69.8) |
| Tajikistan                                       | 55.9<br>(52.6-59.9) | 58.7<br>(56.1-60.9) | 61.3<br>(60.1-63.5) | 63.0<br>(62.2-65.4) | 63.7<br>(63.6-66.3) | 63.1<br>(62.5-65.2) | 63.6<br>(63.8-66.4) | 65.3<br>(66.0-68.5) | 67.9<br>(68.2-70.7) | 70.2<br>(71.0-73.3) |
| Turkmenistan                                     | 63.5<br>(51.4-59.7) | 65.3<br>(55.4-61.7) | 66.5<br>(59.2-63.0) | 67.8<br>(61.7-64.3) | 68.4<br>(62.6-64.9) | 66.2<br>(61.8-64.1) | 66.3<br>(62.2-64.8) | 66.7<br>(64.0-66.5) | 68.8<br>(66.6-69.1) | 70.3<br>(69.0-71.3) |
| Uzbekistan                                       | 61.0<br>(61.2-65.6) | 63.9<br>(63.6-67.1) | 66.1<br>(65.2-67.8) | 67.5<br>(66.8-68.7) | 69.5<br>(67.6-69.2) | 70.7<br>(65.4-66.9) | 72.4<br>(65.5-67.1) | 73.7<br>(65.6-67.7) | 74.4<br>(69.9-69.6) | 75.8<br>(69.0-71.6) |
| Latin America and Caribbean                      | 62.5<br>(60.2-61.8) | 64.8<br>(63.5-64.3) | 67.1<br>(65.8-66.5) | 68.5<br>(67.2-67.8) | 71.1<br>(69.3-69.7) | 72.3<br>(70.5-70.9) | 73.8<br>(72.2-72.6) | 74.8<br>(73.5-73.9) | 75.5<br>(72.2-74.4) | 76.5<br>(75.4-76.2) |
| Central Latin America                            | 66.0<br>(62.1-62.9) | 66.4<br>(64.5-65.2) | 69.0<br>(66.8-67.5) | 67.9<br>(68.2-68.9) | 71.3<br>(70.9-71.4) | 71.9<br>(72.0-72.5) | 73.2<br>(73.6-74.1) | 75.0<br>(74.6-75.1) | 76.4<br>(75.2-75.7) | 78.3<br>(76.0-76.9) |
| Colombia                                         | 68.9<br>(65.4-66.5) | 71.8<br>(65.9-66.9) | 74.5<br>(68.4-69.5) | 75.9<br>(67.0-68.8) | 76.5<br>(69.7-71.7) | 77.0<br>(71.5-72.3) | 78.0<br>(72.8-73.6) | 79.3<br>(74.6-75.3) | 80.4<br>(76.1-76.8) | 81.0<br>(77.3-79.2) |
| Costa Rica                                       | 58.8<br>(68.4-69.4) | 61.8<br>(71.3-72.2) | 64.8<br>(74.5-75.0) | 64.5<br>(75.5-76.3) | 68.1<br>(76.1-77.0) | 70.3<br>(76.5-77.4) | 72.2<br>(77.5-78.4) | 73.2<br>(78.9-79.7) | 74.3<br>(80.2-80.8) | 75.5<br>(80.2-81.7) |
| El Salvador                                      | 50.8<br>(57.5-60.1) | 55.8<br>(60.8-62.8) | 58.8<br>(63.8-65.8) | 62.0<br>(63.4-65.6) | 64.6<br>(67.5-68.8) | 66.6<br>(69.6-70.9) | 68.6<br>(71.6-72.9) | 69.8<br>(72.6-73.8) | 71.3<br>(73.6-74.8) | 72.8<br>(74.2-76.8) |
| Guatemala                                        | 57.3<br>(49.1-52.6) | 60.8<br>(54.0-57.4) | 64.1<br>(57.0-60.7) | 65.4<br>(60.6-63.5) | 67.2<br>(64.3-66.1) | 68.5<br>(65.1-68.3) | 69.5<br>(67.0-70.3) | 70.6<br>(67.9-71.6) | 71.6<br>(69.6-73.0) | 72.7<br>(70.0-75.6) |
| Honduras                                         | 62.1<br>(56.0-58.8) | 64.6<br>(59.3-62.3) | 66.6<br>(62.5-65.7) | 69.0<br>(63.9-66.9) | 71.5<br>(65.3-68.8) | 72.8<br>(66.2-70.4) | 74.6<br>(67.1-72.1) | 75.2<br>(67.9-73.6) | 75.4<br>(68.8-74.7) | 76.4<br>(69.8-75.4) |
| Mexico                                           | 58.4<br>(61.5-62.9) | 64.5<br>(64.1-65.1) | 67.5<br>(66.2-67.0) | 65.2<br>(68.6-69.4) | 73.6<br>(71.2-71.8) | 73.8<br>(72.5-73.2) | 75.7<br>(74.3-74.9) | 76.6<br>(74.9-75.5) | 77.4<br>(75.1-75.8) | 78.3<br>(76.0-76.8) |
| Nicaragua                                        | 68.3<br>(57.3-59.4) | 71.4<br>(63.7-65.2) | 73.6<br>(66.5-68.6) | 74.4<br>(62.3-68.4) | 74.9<br>(73.1-74.1) | 75.4<br>(73.2-74.3) | 76.8<br>(75.2-76.1) | 77.4<br>(76.2-77.1) | 77.7<br>(77.0-77.9) | 78.9<br>(76.7-79.7) |
| Panama                                           | 66.8<br>(67.5-69.0) | 67.8<br>(70.7-72.2) | 69.9<br>(73.9-74.3) | 71.7<br>(73.6-75.0) | 72.6<br>(74.1-75.7) | 72.9<br>(74.6-76.1) | 74.2<br>(76.1-77.4) | 75.0<br>(76.7-78.2) | 75.3<br>(76.9-78.5) | 75.4<br>(77.5-80.2) |
| Venezuela                                        | 51.4<br>(66.2-67.5) | 61.0<br>(67.2-68.4) | 63.4<br>(69.2-70.5) | 65.4<br>(71.1-72.4) | 68.2<br>(72.0-73.3) | 70.2<br>(72.1-73.7) | 73.2<br>(73.5-74.9) | 75.2<br>(74.3-75.8) | 76.3<br>(74.5-76.0) | 77.9<br>(73.3-77.1) |
| Andean Latin America                             | 50.2<br>(46.7-56.2) | 53.4<br>(60.4-61.7) | 56.3<br>(62.7-64.0) | 58.7<br>(64.9-66.0) | 61.3<br>(67.7-68.8) | 64.3<br>(69.7-70.7) | 67.6<br>(72.7-73.6) | 70.1<br>(74.7-75.2) | 71.6<br>(75.7-76.9) | 73.2<br>(76.8-78.9) |
| Bolivia                                          | 63.1<br>(48.9-51.5) | 65.3<br>(52.3-54.6) | 67.7<br>(55.3-57.4) | 69.8<br>(57.6-59.8) | 71.4<br>(60.3-62.4) | 74.2<br>(63.3-65.3) | 75.5<br>(66.9-68.4) | 76.7<br>(69.0-71.0) | 77.8<br>(70.0-73.1) | 78.8<br>(71.1-75.3) |
| Ecuador                                          | 47.4<br>(62.4-63.8) | 62.2<br>(64.6-65.9) | 64.2<br>(67.1-68.3) | 66.0<br>(69.3-70.4) | 69.4<br>(70.9-71.8) | 71.2<br>(72.3-73.2) | 74.8<br>(73.7-74.7) | 79.7<br>(75.0-76.1) | 79.9<br>(76.2-77.2) | 81.0<br>(77.1-78.6) |
| Peru                                             | 63.2<br>(40.3-55.8) | 64.6<br>(61.1-63.2) | 65.7<br>(63.1-65.0) | 67.7<br>(65.1-66.8) | 69.7<br>(68.6-70.2) | 73.8<br>(70.4-72.0) | 74.8<br>(74.1-75.6) | 76.9<br>(76.3-77.9) | 79.3<br>(77.1-78.8) | 81.0<br>(77.9-81.4) |
| Caribbean                                        | 67.0<br>(62.4-64.0) | 68.6<br>(63.9-65.4) | 70.8<br>(64.9-66.5) | 72.7<br>(66.1-67.4) | 74.4<br>(67.1-68.2) | 76.4<br>(67.7-68.8) | 78.4<br>(69.1-70.3) | 79.4<br>(69.6-71.1) | 79.9<br>(48.7-69.2) | 80.4<br>(72.0-74.3) |
| Antigua and Barbuda                              | 64.8<br>(65.9-68.0) | 66.8<br>(67.6-69.7) | 68.0<br>(69.7-71.9) | 69.1<br>(71.7-73.7) | 70.5<br>(7          |                     |                     |                     |                     |                     |

Appendix Table 13A. Estimates of life expectancy at birth by location, both sexes combined, 1970, 1975, 1980, 1985, 1990, 1995, 2000, 2005, 2010, 2016

| Location                               | 1970                | 1975                | 1980                | 1985                | 1990                | 1995                | 2000                | 2005                | 2010                | 2016                |
|----------------------------------------|---------------------|---------------------|---------------------|---------------------|---------------------|---------------------|---------------------|---------------------|---------------------|---------------------|
| Barbados                               | 69.5<br>(68.0-70.6) | 71.1<br>(70.2-72.1) | 72.8<br>(71.8-73.7) | 73.4<br>(72.4-74.2) | 73.7<br>(72.7-74.5) | 73.8<br>(72.9-74.7) | 75.0<br>(74.0-75.9) | 76.0<br>(75.2-76.8) | 76.8<br>(75.9-77.5) | 76.6<br>(75.4-77.7) |
| Belize                                 | 66.4<br>(64.6-68.2) | 68.2<br>(66.9-69.4) | 69.2<br>(68.1-70.4) | 70.9<br>(70.0-71.8) | 71.6<br>(70.5-72.5) | 70.4<br>(69.5-71.5) | 68.6<br>(67.4-69.5) | 69.8<br>(69.0-70.7) | 71.1<br>(70.3-72.0) | 71.8<br>(70.3-73.4) |
| Bermuda                                | 66.9<br>(66.1-67.6) | 68.2<br>(67.4-69.0) | 69.0<br>(68.2-69.8) | 69.3<br>(68.5-70.0) | 69.7<br>(68.9-70.5) | 71.2<br>(70.4-72.0) | 72.5<br>(71.8-73.2) | 75.2<br>(74.5-75.9) | 77.0<br>(76.3-77.7) | 78.9<br>(77.8-80.1) |
| Cuba                                   | 71.9<br>(71.5-72.7) | 73.4<br>(73.0-73.7) | 74.1<br>(73.6-74.4) | 74.4<br>(74.0-74.9) | 74.8<br>(74.4-75.2) | 75.2<br>(74.8-75.6) | 76.5<br>(76.2-76.9) | 77.6<br>(77.2-78.0) | 78.3<br>(78.0-78.7) | 78.9<br>(78.2-79.7) |
| Dominica                               | 67.3<br>(66.0-68.5) | 70.3<br>(69.3-71.2) | 73.1<br>(72.2-73.9) | 73.2<br>(72.4-74.0) | 72.0<br>(71.2-72.8) | 71.6<br>(70.9-72.4) | 72.9<br>(72.1-73.7) | 73.3<br>(72.4-74.2) | 73.0<br>(71.9-73.9) | 72.9<br>(71.3-74.5) |
| Dominican Republic                     | 64.9<br>(63.9-66.0) | 67.1<br>(66.0-68.2) | 69.1<br>(68.1-70.0) | 69.9<br>(69.1-70.7) | 70.7<br>(70.0-71.5) | 72.0<br>(71.2-72.7) | 73.1<br>(72.2-74.1) | 73.3<br>(72.3-74.6) | 74.5<br>(73.4-75.7) | 75.6<br>(74.3-77.3) |
| Grenada                                | 67.6<br>(65.2-69.6) | 69.6<br>(67.4-71.5) | 70.3<br>(68.1-72.2) | 70.2<br>(68.3-71.8) | 70.9<br>(69.5-72.1) | 71.5<br>(70.4-72.5) | 71.3<br>(70.2-72.3) | 71.1<br>(70.0-72.0) | 71.3<br>(70.3-72.5) | 71.6<br>(70.0-73.3) |
| Guyana                                 | 60.7<br>(59.7-61.7) | 61.7<br>(60.8-62.6) | 63.1<br>(62.2-64.1) | 64.1<br>(63.2-65.0) | 64.2<br>(63.4-65.0) | 64.9<br>(64.3-65.7) | 65.4<br>(64.7-66.3) | 64.6<br>(63.8-65.5) | 65.4<br>(64.5-66.3) | 67.7<br>(66.4-69.2) |
| Haiti                                  | 45.5<br>(43.1-47.9) | 48.2<br>(46.1-50.5) | 50.3<br>(48.2-52.6) | 52.4<br>(50.7-54.1) | 54.0<br>(52.5-55.5) | 55.1<br>(53.5-56.6) | 56.8<br>(55.0-58.6) | 58.0<br>(56.1-60.0) | 31.6<br>(21.0-53.5) | 64.0<br>(61.4-66.7) |
| Jamaica                                | 68.8<br>(67.8-69.8) | 70.9<br>(69.8-72.1) | 71.6<br>(70.5-72.7) | 72.7<br>(71.8-73.6) | 74.4<br>(73.3-75.4) | 74.2<br>(72.9-75.3) | 73.8<br>(72.8-74.8) | 74.7<br>(73.6-75.7) | 74.6<br>(73.4-75.7) | 74.9<br>(73.1-76.7) |
| Puerto Rico                            | 71.8<br>(71.3-72.4) | 72.5<br>(72.0-73.0) | 74.0<br>(73.4-74.5) | 73.9<br>(73.3-74.6) | 74.0<br>(73.4-74.5) | 73.8<br>(73.2-74.3) | 76.1<br>(75.6-76.6) | 77.1<br>(76.6-77.6) | 78.0<br>(77.5-78.5) | 78.8<br>(77.8-79.7) |
| Saint Lucia                            | 65.8<br>(62.9-67.8) | 67.2<br>(65.6-68.4) | 69.0<br>(67.8-70.0) | 70.4<br>(69.2-71.3) | 71.9<br>(70.9-72.7) | 73.1<br>(72.2-73.9) | 74.2<br>(73.4-74.8) | 74.1<br>(73.3-74.9) | 75.4<br>(74.6-76.2) | 76.1<br>(74.9-77.1) |
| Saint Vincent and the Grenadines       | 65.0<br>(62.7-67.2) | 66.8<br>(64.8-68.4) | 69.1<br>(67.5-70.4) | 70.4<br>(69.2-71.5) | 70.7<br>(69.6-71.6) | 70.4<br>(69.5-71.3) | 70.1<br>(69.3-70.9) | 71.1<br>(70.4-71.7) | 71.5<br>(70.8-72.2) | 71.6<br>(70.6-72.6) |
| Suriname                               | 64.6<br>(63.4-65.6) | 64.9<br>(64.0-65.8) | 66.0<br>(65.3-66.7) | 68.7<br>(68.1-69.3) | 70.1<br>(69.5-70.6) | 70.2<br>(69.6-70.8) | 69.6<br>(69.0-70.3) | 69.4<br>(68.7-70.1) | 70.2<br>(69.5-70.9) | 71.3<br>(70.3-72.3) |
| Trinidad and Tobago                    | 65.4<br>(64.9-66.0) | 66.5<br>(65.9-67.0) | 68.1<br>(67.6-68.6) | 68.9<br>(68.3-69.5) | 69.0<br>(68.4-69.5) | 69.2<br>(68.7-69.8) | 69.4<br>(68.8-70.0) | 71.3<br>(70.6-71.9) | 72.4<br>(71.6-73.2) | 73.0<br>(71.7-74.2) |
| Virgin Islands, U.S.                   | 67.2<br>(66.6-68.1) | 68.7<br>(67.6-69.6) | 70.1<br>(69.3-71.0) | 72.0<br>(71.3-73.0) | 72.6<br>(71.7-73.7) | 72.6<br>(71.7-73.4) | 73.3<br>(72.5-74.0) | 73.8<br>(73.1-74.4) | 73.9<br>(73.0-74.8) | 74.6<br>(73.4-76.2) |
| Tropical Latin America                 | 61.4<br>(60.2-62.5) | 63.6<br>(62.7-64.5) | 65.9<br>(65.1-66.5) | 67.0<br>(66.4-67.5) | 68.6<br>(68.1-69.0) | 69.8<br>(69.4-70.2) | 71.4<br>(71.0-71.8) | 73.0<br>(72.5-73.0) | 74.1<br>(73.7-74.6) | 75.2<br>(74.7-75.7) |
| Brazil                                 | 61.3<br>(60.1-62.5) | 63.5<br>(62.6-64.4) | 65.9<br>(65.0-66.4) | 68.4<br>(66.3-67.4) | 68.9<br>(68.0-68.9) | 69.7<br>(69.2-70.1) | 72.9<br>(70.9-71.8) | 74.2<br>(72.5-73.3) | 75.2<br>(73.7-74.6) | 75.2<br>(74.7-75.7) |
| Paraguay                               | 69.6<br>(68.8-70.3) | 70.6<br>(70.0-71.2) | 72.4<br>(71.5-72.8) | 73.4<br>(72.7-73.8) | 74.6<br>(74.1-75.1) | 74.5<br>(73.8-75.0) | 74.4<br>(73.9-74.9) | 74.1<br>(73.4-74.6) | 74.5<br>(73.3-74.7) | 74.5<br>(73.3-75.6) |
| Southeast Asia, East Asia, and Oceania | 59.6<br>(58.8-60.4) | 61.8<br>(61.1-62.4) | 63.6<br>(63.1-64.0) | 65.6<br>(65.0-65.8) | 66.5<br>(66.2-66.9) | 67.7<br>(67.3-68.0) | 69.1<br>(68.9-69.4) | 71.2<br>(71.0-71.4) | 73.2<br>(73.0-73.4) | 75.1<br>(74.8-75.3) |
| East Asia                              | 61.2<br>(60.2-62.0) | 63.5<br>(62.7-64.2) | 64.5<br>(63.8-65.1) | 66.2<br>(65.7-66.8) | 67.2<br>(66.6-67.6) | 68.3<br>(67.8-68.7) | 69.8<br>(69.5-70.2) | 72.3<br>(72.0-72.5) | 74.4<br>(74.2-74.6) | 76.3<br>(76.0-76.5) |
| China                                  | 60.9<br>(60.0-61.8) | 63.2<br>(62.5-63.9) | 64.2<br>(63.5-64.9) | 66.0<br>(65.4-66.6) | 67.0<br>(66.4-67.4) | 67.8<br>(67.9-68.7) | 69.9<br>(69.6-70.2) | 72.3<br>(72.0-72.5) | 74.4<br>(74.2-74.6) | 76.4<br>(76.1-76.6) |
| North Korea                            | 70.1<br>(66.1-69.0) | 71.6<br>(68.9-71.4) | 71.2<br>(70.0-72.4) | 71.6<br>(70.4-72.8) | 71.9<br>(70.8-73.3) | 73.9<br>(73.5-74.4) | 74.7<br>(74.2-75.1) | 76.1<br>(75.7-76.5) | 79.0<br>(78.6-79.4) | 79.7<br>(78.5-81.0) |
| Taiwan (Province of China)             | 68.7<br>(68.3-69.2) | 70.7<br>(70.3-71.2) | 71.6<br>(71.1-72.0) | 73.0<br>(72.6-73.4) | 73.9<br>(73.5-74.4) | 74.7<br>(74.2-75.1) | 76.1<br>(75.7-76.5) | 77.5<br>(77.0-77.9) | 79.0<br>(78.6-79.4) | 79.7<br>(78.5-81.0) |
| Southeast Asia                         | 55.5<br>(54.4-56.4) | 57.4<br>(55.9-58.9) | 61.4<br>(61.1-61.9) | 63.6<br>(63.2-63.9) | 65.3<br>(64.9-65.7) | 66.7<br>(66.4-67.0) | 69.3<br>(67.5-68.2) | 70.9<br>(68.9-69.7) | 72.7<br>(70.5-71.3) | 72.7<br>(72.2-73.1) |
| Cambodia                               | 44.3<br>(41.2-46.9) | 22.9<br>(14.4-44.6) | 52.6<br>(50.7-54.5) | 54.2<br>(52.5-55.9) | 57.4<br>(56.5-58.3) | 58.2<br>(57.5-59.0) | 59.5<br>(58.6-60.4) | 66.2<br>(62.1-63.8) | 66.2<br>(65.4-67.1) | 66.2<br>(67.8-69.7) |
| Indonesia                              | 53.7<br>(53.0-54.4) | 56.5<br>(55.8-57.1) | 59.3<br>(58.7-59.8) | 61.8<br>(61.3-62.2) | 63.6<br>(63.2-64.0) | 65.7<br>(65.4-66.1) | 67.2<br>(66.9-67.6) | 69.9<br>(68.2-68.9) | 69.9<br>(69.4-70.3) | 69.9<br>(71.0-72.2) |
| Laos                                   | 42.1<br>(36.0-47.1) | 45.6<br>(41.1-49.7) | 47.8<br>(44.8-50.6) | 50.7<br>(48.9-52.4) | 52.4<br>(51.0-53.8) | 54.5<br>(53.1-55.7) | 57.0<br>(55.8-58.2) | 60.3<br>(59.1-61.4) | 63.8<br>(62.6-64.9) | 67.2<br>(65.6-68.6) |
| Malaysia                               | 64.4<br>(64.1-64.8) | 66.8<br>(66.4-67.1) | 68.8<br>(68.4-69.2) | 70.4<br>(70.2-70.7) | 71.6<br>(71.3-71.8) | 73.0<br>(72.1-72.5) | 73.0<br>(72.8-73.2) | 73.0<br>(73.6-74.0) | 74.4<br>(74.2-74.7) | 75.6<br>(75.1-76.0) |
| Maldives                               | 39.2<br>(36.4-41.9) | 44.3<br>(41.9-46.9) | 48.3<br>(46.4-50.5) | 55.4<br>(54.6-56.3) | 62.5<br>(61.7-63.4) | 67.8<br>(66.8-68.9) | 72.1<br>(71.3-72.8) | 75.8<br>(75.0-76.5) | 77.8<br>(77.1-78.5) | 79.3<br>(77.5-81.1) |
| Mauritius                              | 60.8<br>(60.4-61.1) | 62.7<br>(62.3-63.1) | 65.8<br>(65.4-66.2) | 67.5<br>(67.2-68.0) | 69.3<br>(68.9-69.7) | 70.3<br>(69.9-70.7) | 71.4<br>(71.0-71.8) | 73.3<br>(71.9-72.7) | 74.6<br>(72.9-73.8) | 76.1<br>(73.2-75.9) |
| Myanmar                                | 48.4<br>(45.7-50.8) | 52.5<br>(50.2-54.7) | 55.4<br>(53.4-57.3) | 57.3<br>(55.5-59.0) | 58.6<br>(57.0-60.1) | 59.5<br>(57.8-61.0) | 61.1<br>(59.3-62.7) | 63.6<br>(61.6-65.0) | 66.8<br>(65.0-68.1) | 70.0<br>(68.8-71.1) |
| Philippines                            | 62.9<br>(62.5-63.8) | 63.7<br>(63.0-64.4) | 64.7<br>(64.0-65.4) | 65.4<br>(64.8-66.0) | 67.0<br>(66.4-67.7) | 68.0<br>(67.4-68.6) | 68.1<br>(67.5-68.7) | 68.2<br>(67.5-68.8) | 68.9<br>(68.2-69.5) | 69.1<br>(68.7-71.5) |
| Sri Lanka                              | 64.7<br>(64.1-65.4) | 64.7<br>(64.0-65.3) | 68.7<br>(68.0-69.3) | 70.1<br>(69.4-70.8) | 71.3<br>(70.5-72.1) | 71.3<br>(71.1-72.9) | 72.9<br>(71.8-73.3) | 73.9<br>(73.1-74.7) | 74.4<br>(73.3-75.5) | 74.4<br>(75.2-79.7) |
| Seychelles                             | 65.4<br>(64.2-66.4) | 67.9<br>(67.0-68.8) | 69.7<br>(69.1-71.2) | 71.2<br>(69.1-70.5) | 72.9<br>(68.3-69.8) | 73.0<br>(69.1-70.7) | 73.9<br>(70.2-71.5) | 74.9<br>(71.4-72.6) | 75.2<br>(72.6-73.9) | 73.7<br>(73.2-74.9) |
| Thailand                               | 62.3<br>(61.7-63.0) | 64.9<br>(64.3-65.6) | 66.2<br>(65.7-66.9) | 68.7<br>(68.2-69.3) | 70.6<br>(70.0-71.1) | 70.8<br>(70.1-71.4) | 71.9<br>(71.2-72.5) | 74.1<br>(73.6-74.6) | 76.5<br>(76.0-77.0) | 77.7<br>(76.7-78.8) |
| Timor-Leste                            | 43.7<br>(39.3-47.9) | 42.9<br>(39.6-46.4) | 46.8<br>(44.0-49.8) | 54.3<br>(52.2-56.8) | 57.9<br>(55.8-60.0) | 60.8<br>(59.0-62.6) | 63.6<br>(62.0-65.3) | 67.2<br>(65.6-68.9) | 71.1<br>(69.0-73.1) | 72.7<br>(70.4-75.0) |
| Vietnam                                | 53.6<br>(47.5-59.9) | 61.2<br>(59.1-63.3) | 64.5<br>(63.0-65.9) | 66.6<br>(65.1-68.1) | 68.2<br>(66.8-69.7) | 69.5<br>(68.1-71.2) | 70.8<br>(69.5-72.2) | 71.8<br>(70.5-73.2) | 73.1<br>(71.9-74.6) | 74.6<br>(73.4-75.6) |
| Oceania                                | 56.3<br>(54.5-58.2) | 57.2<br>(55.5-59.0) | 57.8<br>(56.0-59.4) | 58.1<br>(56.4-59.8) | 58.5<br>(56.6-60.1) | 59.1<br>(57.3-61.0) | 59.6<br>(57.5-61.5) | 60.5<br>(57.3-61.7) | 60.5<br>(58.0-62.7) | 62.2<br>(59.8-64.4) |
| American Samoa                         | 66.9<br>(65.7-68.1) | 68.9<br>(67.4-70.3) | 69.7<br>(68.2-71.0) | 70.2<br>(68.9-71.3) | 70.5<br>(69.4-71.6) | 70.7<br>(69.4-72.1) | 71.5<br>(70.4-72.7) | 71.6<br>(70.4-72.7) | 72.4<br>(71.2-73.5) | 72.4<br>(70.5-74.3) |
| Federated States of Micronesia         | 59.7<br>(57.2-62.7) | 60.6<br>(58.2-63.2) | 61.6<br>(59.5-64.0) | 62.4<br>(60.3-64.6) | 63.2<br>(60.9-65.3) | 64.2<br>(62.0-66.4) | 64.7<br>(62.4-67.0) | 65.6<br>(63.2-67.9) | 65.3<br>(62.4-67.9) | 65.5<br>(62.5-68.3) |
| Fiji                                   | 64.2<br>(62.5-66.0) | 64.0<br>(62.5-65.8) | 64.6<br>(63.0-66.2) | 65.3<br>(63.7-66.7) | 65.2<br>(62.5-67.9) | 64.5<br>(62.3-66.6) | 64.2<br>(62.5-65.7) | 64.8<br>(63.3-66.3) | 65.2<br>(63.3-67.1) | 65.4<br>(62.4-68.6) |
| Guam                                   | 67.5<br>(66.5-68.7) | 68.4<br>(67.3-69.5) | 71.3<br>(70.2-72.3) | 72.9<br>(71.8-74.0) | 73.1<br>(72.1-74.0) | 73.3<br>(72.2-74.4) | 73.9<br>(72.9-74.7) | 73.5<br>(72.6-74.3) | 72.1<br>(71.2-73.2) | 72.3<br>(70.7-73.9) |
| Kiribati                               | 54.8<br>(52.0-57.6) | 57.7<br>(54.6-60.6) | 58.7<br>(55.0-61.6) | 57.9<br>(54.8-60.4) | 58.1<br>(56.4-59.8) | 58.5<br>(57.2-59.7) | 59.4<br>(58.1-60.6) | 60.1<br>(58.4-61.7) | 60.7<br>(58.5-62.7) | 61.8<br>(59.1-64.1) |
| Marshall Islands                       | 60.4<br>(56.8-63.6) | 62.4<br>(58.9-65.3) | 63.9<br>(61.2-66.4) | 64.3<br>(62.4-65.9) | 64.5<br>(63.2-65.6) | 64.4<br>(63.2-65.4) | 63.2<br>(61.7-64.7) | 63.1<br>(61.5-64.5) | 63.6<br>(61.9-65.5) | 64.9<br>(62.9-67.0) |
| Northern Mariana Islands               | 69.2<br>(66.9-71.6) | 70.7<br>(68.3-72.9) | 71.9<br>(69.6-74.1) | 72.5<br>(70.3-74.7) | 73.6<br>(71.6-75.9) | 73.6<br>(73.4-77.0) | 75.2<br>(74.6-77.8) | 76.1<br>(74.6-77.7) | 75.9<br>(74.2-77.4) | 75.5<br>(73.8-77.1) |
| Papua New Guinea                       | 53.9<br>(51.5-56.5) | 55.0<br>(52.7-57.5) | 55.2<br>(52.9-57.5) | 55.4<br>(53.3-57.7) | 55.9<br>(53.8-58.2) | 56.9<br>(54.5-59.4) | 57.6<br>(54.9-60.2) | 57.6<br>(54.7-60.3) | 58.7<br>(55.6-61.4) | 60.8<br>(57.9-63.6) |
| Samoa                                  | 65.0<br>(63.6-66.4) | 65.5<br>(64.1-66.7) | 67.4<br>(65.9-68.6) | 68.0<br>(66.2-69.5) | 68.9<br>(66.7-70.5) | 69.6<br>(67.9-71.2) | 70.3<br>(68.6-72.0) | 71.1<br>(69.6-72.7) | 71.4<br>(70.0-73.1) | 71.9<br>(70.3-73.6) |
| Solomon Islands                        | 54.4<br>(51.9-57.2) | 54.4<br>(51.9-57.1) | 56.7<br>(56.3-61.2) | 59.7<br>(57.4-62.2) | 60.1<br>(57.9-62.5) | 60.9<br>(58.7-63.1) | 61.4<br>(59.3-63.7) | 61.0<br>(58.8-63.3) | 61.7<br>(59.3-64.0) | 63.0<br>(60.4-65.5) |
| Tonga                                  | 65.4<br>(63.5-67.5) | 65.9<br>(64.0-67.9) | 65.9<br>(63.9-67.9) | 66.8<br>(64.9-68.8) | 67.9<br>(66.0-69.7) | 68.4<br>(66.4-70.1) | 68.7<br>(66.9-70.3) | 69.4<br>(67.8-70.9) | 69.8<br>(68.0-71.5) | 70.4<br>(68.5-72.3) |
| Vanuatu                                | 57.5<br>(53.2-59.4) | 58.5<br>(55.7-61.1) | 60.1<br>(57.8-62.4) | 61.1<br>(59.1-63.2) | 61.7<br>(59.7-63.7) | 62.1<br>(60.1-64.2) | 62.3<br>(60.3-64.2) | 62.3<br>(59.9-64.4) | 62.3<br>(60.4-65.2) | 63.9<br>(61.2-66.3) |
| North Africa and Middle East           | 54.0<br>(54.0-55.8) | 55.9<br>(57.9-59.1) | 58.5<br>(60.4-61.8) | 61.1<br>(62.6-64.4) | 61.7<br>(66.5-67.3) | 61.7<br>(67.8-68.4) | 62.1<br>(69.4-70.1) | 62.3<br>(70.4-71.3) | 62.3<br>(71.9-72.8) | 63.0<br>(72.6-73.8) |
| North Africa and Middle East           | 45.8<br>(42.2-49.2) | 46.3<br>(43.4-49.0) | 43.3<br>(39.6-47.1) | 43.3<br>(35.6-48.1) | 41.4<br>(35.6-48.1) | 41.4<br>(50.3-52.9) | 51.0<br>(49.8-52.4) | 53.8<br>(50.4-52.9) | 56.2<br>(52.5-55.1) | 57.9<br>(54.8-57.4) |
| Afghanistan                            | 57.5<br>(55.8-59.2) | 59.5<br>(58.1-60.9) | 62.1<br>(61.1-63.2) | 62.1<br>(67.3-68.9) | 68.0<br>(70.2-71.9) | 71.0<br>(71.3-73.2) | 73.8<br>(72.9-74.8) | 75.4<br>(74.4-76.2) | 76.4<br>(76.0-77.1) | 77.5<br>(76.5-78.2) |
| Algeria                                | 64.5<br>(62.0-66.9) | 67.4<br>(65.3-69.5) | 70.4<br>(68.4-71.3) | 70.4                |                     |                     |                     |                     |                     |                     |

Appendix Table 13A. Estimates of life expectancy at birth by location, both sexes combined, 1970, 1975, 1980, 1985, 1990, 1995, 2000, 2005, 2010, 2016

| Location                    | 1970                | 1975                | 1980                | 1985                | 1990                | 1995                | 2000                | 2005                | 2010                | 2016                |
|-----------------------------|---------------------|---------------------|---------------------|---------------------|---------------------|---------------------|---------------------|---------------------|---------------------|---------------------|
| Egypt                       | 51.5<br>(50.1-52.8) | 54.7<br>(53.5-56.0) | 58.8<br>(57.4-60.0) | 61.1<br>(60.1-61.9) | 65.3<br>(64.5-66.1) | 67.7<br>(66.9-68.4) | 69.9<br>(69.2-70.5) | 70.2<br>(69.6-70.9) | 70.5<br>(69.8-71.1) | 72.1<br>(70.7-73.5) |
| Iran                        | 55.4<br>(51.9-58.9) | 64.4<br>(62.1-66.7) | 66.3<br>(64.1-68.4) | 68.1<br>(65.8-70.4) | 67.9<br>(65.7-70.2) | 70.7<br>(69.3-72.2) | 71.4<br>(70.1-72.8) | 72.4<br>(70.5-74.1) | 74.4<br>(72.5-76.2) | 75.9<br>(74.2-77.6) |
| Iraq                        | 60.5<br>(59.0-62.1) | 61.0<br>(59.7-62.3) | 61.1<br>(57.5-64.7) | 60.1<br>(55.5-65.1) | 66.1<br>(64.4-67.7) | 65.2<br>(63.8-66.6) | 66.0<br>(64.6-67.3) | 64.7<br>(62.7-66.9) | 67.2<br>(65.2-69.3) | 67.6<br>(65.1-70.3) |
| Jordan                      | 62.0<br>(60.1-63.7) | 64.6<br>(62.8-66.1) | 66.7<br>(64.9-68.3) | 69.2<br>(67.9-70.6) | 71.8<br>(70.6-72.9) | 72.6<br>(71.1-74.1) | 73.1<br>(71.3-74.9) | 73.1<br>(71.2-74.9) | 75.7<br>(73.8-77.5) | 76.3<br>(74.1-78.5) |
| Kuwait                      | 69.2<br>(67.8-70.6) | 69.7<br>(68.5-70.8) | 71.6<br>(70.3-72.9) | 73.7<br>(72.5-74.8) | 75.6<br>(74.0-77.3) | 76.1<br>(74.9-77.3) | 76.4<br>(75.4-77.6) | 77.1<br>(75.8-78.2) | 78.2<br>(77.0-79.3) | 79.7<br>(77.4-82.1) |
| Lebanon                     | 66.6<br>(63.9-69.1) | 59.3<br>(52.6-67.0) | 52.5<br>(43.4-64.9) | 64.2<br>(59.3-69.0) | 69.1<br>(67.6-70.9) | 73.5<br>(72.5-74.7) | 76.5<br>(75.2-77.5) | 78.3<br>(77.3-79.3) | 79.8<br>(78.9-80.7) | 80.1<br>(78.9-81.1) |
| Libya                       | 66.0<br>(64.6-67.4) | 69.0<br>(67.7-70.1) | 70.3<br>(71.3-72.4) | 72.5<br>(71.5-73.5) | 73.0<br>(72.1-74.0) | 74.0<br>(73.0-75.0) | 74.3<br>(73.3-75.3) | 75.2<br>(74.1-76.2) | 76.1<br>(74.9-77.1) | 75.1<br>(73.7-76.4) |
| Morocco                     | 55.3<br>(54.3-56.1) | 57.8<br>(57.0-58.6) | 61.0<br>(60.2-61.8) | 64.6<br>(63.9-65.3) | 67.2<br>(66.5-67.9) | 69.0<br>(68.2-69.7) | 70.9<br>(70.1-71.6) | 72.2<br>(71.4-73.0) | 73.6<br>(72.7-74.5) | 75.0<br>(74.1-75.9) |
| Palestine                   | 62.3<br>(58.7-66.0) | 67.1<br>(64.9-69.2) | 69.0<br>(67.1-70.9) | 70.7<br>(69.0-72.3) | 71.0<br>(69.6-72.4) | 72.0<br>(71.1-73.0) | 71.4<br>(70.8-72.0) | 71.8<br>(71.4-72.1) | 72.2<br>(71.9-72.5) | 71.8<br>(71.2-72.4) |
| Oman                        | 50.7<br>(48.1-53.1) | 56.3<br>(54.3-58.3) | 62.6<br>(61.0-64.3) | 67.6<br>(66.4-69.0) | 70.6<br>(69.6-71.7) | 72.7<br>(71.8-73.6) | 74.4<br>(73.6-75.2) | 75.8<br>(75.0-76.5) | 75.7<br>(75.0-76.6) | 77.0<br>(76.3-77.7) |
| Qatar                       | 66.6<br>(62.7-70.4) | 67.7<br>(64.0-71.3) | 69.5<br>(66.6-72.6) | 72.7<br>(70.6-74.5) | 75.0<br>(73.0-76.8) | 74.6<br>(72.8-76.4) | 75.0<br>(73.1-76.9) | 76.4<br>(74.6-78.3) | 79.0<br>(77.3-80.7) | 79.9<br>(77.1-82.5) |
| Saudi Arabia                | 64.5<br>(61.8-67.1) | 68.6<br>(66.7-70.4) | 71.0<br>(69.6-72.5) | 71.9<br>(70.7-73.2) | 71.9<br>(70.7-73.1) | 72.7<br>(71.6-73.7) | 72.8<br>(72.1-73.6) | 73.7<br>(73.2-74.3) | 75.0<br>(74.4-75.5) | 77.1<br>(76.4-77.8) |
| Sudan                       | 52.5<br>(51.2-53.8) | 53.5<br>(52.4-54.6) | 54.9<br>(53.6-56.1) | 50.5<br>(46.8-54.5) | 58.5<br>(57.6-59.5) | 60.4<br>(59.5-61.3) | 62.6<br>(61.7-63.4) | 64.9<br>(64.1-65.6) | 66.3<br>(65.4-67.1) | 68.3<br>(66.9-69.4) |
| Syria                       | 64.5<br>(63.6-65.4) | 67.0<br>(66.2-67.7) | 68.7<br>(68.0-69.4) | 70.0<br>(69.3-70.7) | 70.9<br>(70.2-71.6) | 72.1<br>(71.1-72.8) | 73.2<br>(72.6-73.9) | 74.8<br>(74.2-75.3) | 76.0<br>(75.7-76.6) | 68.0<br>(62.2-74.2) |
| Tunisia                     | 57.5<br>(56.6-58.5) | 62.1<br>(61.2-62.9) | 65.5<br>(64.6-66.3) | 69.8<br>(68.8-70.6) | 71.6<br>(70.8-72.4) | 72.8<br>(71.9-73.6) | 74.9<br>(73.8-75.9) | 76.0<br>(74.9-77.2) | 76.8<br>(75.9-78.3) | 77.5<br>(75.9-79.1) |
| Turkey                      | 56.9<br>(54.6-59.5) | 60.0<br>(58.2-61.9) | 64.0<br>(62.5-65.4) | 67.9<br>(66.6-69.1) | 70.1<br>(69.2-71.0) | 70.8<br>(70.1-71.6) | 71.1<br>(70.4-71.8) | 71.7<br>(70.7-72.4) | 73.3<br>(72.3-73.9) | 79.2<br>(77.6-80.8) |
| United Arab Emirates        | 65.1<br>(61.6-68.7) | 68.2<br>(64.6-71.4) | 70.6<br>(67.8-73.6) | 72.2<br>(69.6-74.7) | 72.5<br>(69.1-74.6) | 73.0<br>(71.2-75.0) | 73.0<br>(72.9-75.7) | 76.0<br>(75.0-76.7) | 75.6<br>(74.3-77.1) | 75.5<br>(73.5-77.4) |
| Yemen                       | 49.0<br>(40.2-43.6) | 52.0<br>(47.3-50.0) | 54.7<br>(51.9-54.6) | 56.9<br>(55.4-57.9) | 59.1<br>(57.5-59.9) | 60.9<br>(59.3-61.7) | 62.5<br>(61.5-63.8) | 64.3<br>(63.9-64.1) | 66.8<br>(66.2-68.7) | 68.8<br>(65.2-68.0) |
| South Asia                  | 49.0<br>(48.1-49.9) | 52.0<br>(51.4-52.7) | 54.7<br>(54.1-55.3) | 56.9<br>(56.5-57.4) | 59.1<br>(58.7-59.5) | 60.9<br>(60.5-61.3) | 62.5<br>(62.1-62.9) | 64.3<br>(63.8-64.7) | 66.4<br>(65.9-66.8) | 68.2<br>(68.2-69.2) |
| South Asia                  | 43.8<br>(40.2-48.1) | 52.4<br>(51.1-53.9) | 53.8<br>(52.8-54.9) | 55.3<br>(54.4-56.1) | 57.3<br>(57.3-59.0) | 58.1<br>(60.8-62.5) | 61.7<br>(64.7-66.2) | 65.4<br>(67.3-68.6) | 70.3<br>(69.5-71.0) | 72.6<br>(71.4-73.7) |
| Bangladesh                  | 48.8<br>(45.9-51.5) | 51.2<br>(48.7-53.6) | 53.3<br>(51.1-55.4) | 56.4<br>(54.5-58.2) | 59.6<br>(58.3-61.5) | 62.5<br>(61.5-64.3) | 65.6<br>(64.2-66.9) | 69.5<br>(68.2-70.6) | 71.9<br>(70.5-73.2) | 73.8<br>(72.3-75.3) |
| Bhutan                      | 49.0<br>(48.0-50.0) | 51.5<br>(50.8-52.2) | 54.4<br>(53.8-55.0) | 56.8<br>(56.3-57.3) | 59.0<br>(58.5-59.4) | 60.7<br>(60.3-61.2) | 62.3<br>(61.8-62.7) | 64.2<br>(63.6-64.7) | 66.1<br>(65.5-66.7) | 68.5<br>(67.9-69.1) |
| India                       | 49.0<br>(48.0-50.0) | 50.6<br>(49.6-51.6) | 52.4<br>(51.6-53.4) | 54.9<br>(54.0-55.8) | 57.7<br>(56.9-58.5) | 60.6<br>(59.9-61.3) | 63.7<br>(63.0-64.4) | 66.0<br>(65.3-66.7) | 68.3<br>(67.5-69.1) | 70.9<br>(70.1-71.7) |
| Nepal                       | 56.9<br>(55.4-58.4) | 58.6<br>(57.3-60.0) | 60.3<br>(59.1-61.4) | 61.7<br>(60.9-62.5) | 62.4<br>(61.7-63.2) | 62.6<br>(61.2-62.8) | 62.6<br>(61.8-63.5) | 62.5<br>(61.3-63.7) | 63.3<br>(64.0-66.5) | 65.3<br>(66.1-69.1) |
| Pakistan                    | 49.4<br>(48.4-50.4) | 51.0<br>(50.2-51.7) | 52.4<br>(51.9-53.0) | 53.4<br>(52.9-53.9) | 53.7<br>(53.3-54.1) | 53.4<br>(52.9-53.8) | 52.8<br>(52.4-53.3) | 52.8<br>(54.2-55.1) | 54.7<br>(57.7-58.8) | 58.2<br>(62.1-63.5) |
| Sub-Saharan Africa          | 57.1<br>(55.7-58.5) | 58.7<br>(57.7-59.8) | 59.9<br>(59.1-60.7) | 62.1<br>(61.5-62.7) | 63.8<br>(63.0-64.5) | 61.6<br>(60.4-62.8) | 63.2<br>(62.0-64.4) | 64.7<br>(64.8-70.7) | 66.1<br>(62.5-54.1) | 61.6<br>(60.7-62.6) |
| Southern Sub-Saharan Africa | 56.6<br>(55.3-58.0) | 59.6<br>(58.5-60.9) | 61.7<br>(60.6-63.0) | 63.9<br>(62.7-65.3) | 64.4<br>(61.9-67.1) | 56.2<br>(50.4-63.8) | 46.6<br>(41.1-53.7) | 47.7<br>(43.6-52.5) | 55.4<br>(52.9-61.0) | 65.2<br>(61.7-71.4) |
| Botswana                    | 56.0<br>(53.8-58.1) | 57.2<br>(55.0-59.5) | 58.9<br>(56.7-61.1) | 59.8<br>(57.9-61.8) | 60.4<br>(59.0-62.0) | 57.7<br>(55.5-59.8) | 48.8<br>(45.8-51.9) | 43.3<br>(40.3-46.3) | 46.3<br>(44.1-48.7) | 50.3<br>(47.6-52.7) |
| Lesotho                     | 58.3<br>(56.4-60.1) | 59.1<br>(57.7-60.6) | 60.9<br>(58.1-60.5) | 61.5<br>(59.9-61.9) | 61.5<br>(60.5-62.5) | 59.9<br>(57.9-61.8) | 53.6<br>(50.5-57.1) | 51.6<br>(48.6-54.8) | 58.6<br>(56.1-61.4) | 64.8<br>(62.1-68.1) |
| Namibia                     | 57.2<br>(55.3-59.0) | 58.7<br>(57.4-60.1) | 59.8<br>(58.8-60.9) | 61.9<br>(61.1-62.7) | 64.3<br>(63.7-65.0) | 64.2<br>(63.4-64.9) | 55.4<br>(54.1-56.4) | 51.1<br>(50.0-52.3) | 54.3<br>(53.4-55.3) | 57.4<br>(61.2-63.5) |
| South Africa                | 51.4<br>(47.6-55.2) | 54.9<br>(52.2-57.8) | 57.8<br>(55.4-60.1) | 60.2<br>(58.0-62.3) | 62.4<br>(60.5-64.2) | 59.3<br>(56.1-62.5) | 47.4<br>(43.2-52.0) | 49.4<br>(39.2-45.9) | 46.9<br>(44.0-49.9) | 57.4<br>(53.9-61.6) |
| Swaziland                   | 57.6<br>(56.0-59.2) | 59.0<br>(57.7-60.4) | 60.4<br>(59.2-61.6) | 63.1<br>(62.0-64.1) | 63.1<br>(58.7-65.2) | 53.5<br>(49.3-58.4) | 46.6<br>(43.3-50.5) | 45.3<br>(42.8-48.1) | 49.5<br>(47.5-51.3) | 59.2<br>(57.1-61.4) |
| Zimbabwe                    | 48.9<br>(47.6-50.1) | 48.9<br>(49.8-52.0) | 49.9<br>(49.8-53.8) | 52.9<br>(53.4-54.9) | 54.2<br>(53.6-55.2) | 54.4<br>(53.8-55.7) | 54.8<br>(55.7-57.4) | 56.6<br>(55.7-57.4) | 59.6<br>(58.7-60.5) | 63.3<br>(62.3-64.2) |
| Western Sub-Saharan Africa  | 47.2<br>(46.1-48.3) | 49.6<br>(48.5-50.7) | 51.6<br>(50.6-52.5) | 53.8<br>(52.8-54.7) | 55.5<br>(54.6-56.5) | 56.5<br>(55.5-57.5) | 57.6<br>(56.5-58.7) | 59.5<br>(58.4-60.6) | 61.8<br>(60.6-63.0) | 64.4<br>(63.1-65.7) |
| Benin                       | 44.4<br>(42.8-45.8) | 46.1<br>(45.0-47.2) | 48.2<br>(47.4-49.1) | 50.1<br>(49.3-50.9) | 50.7<br>(49.6-51.8) | 50.7<br>(49.4-52.2) | 52.2<br>(51.1-53.3) | 55.1<br>(54.1-56.1) | 57.9<br>(56.9-58.9) | 60.8<br>(59.5-61.9) |
| Burkina Faso                | 51.7<br>(50.5-53.0) | 53.6<br>(52.4-54.8) | 55.6<br>(54.4-56.7) | 57.8<br>(56.8-58.9) | 58.4<br>(57.9-59.6) | 56.5<br>(54.9-58.1) | 54.4<br>(52.9-56.1) | 54.9<br>(53.2-56.6) | 57.2<br>(55.4-59.1) | 60.1<br>(57.8-62.4) |
| Cameroon                    | 57.6<br>(55.7-59.6) | 61.7<br>(60.1-63.4) | 65.4<br>(64.3-66.4) | 65.8<br>(65.0-66.7) | 68.0<br>(67.1-69.0) | 67.3<br>(65.6-69.2) | 69.8<br>(68.0-71.8) | 71.0<br>(69.4-72.9) | 72.3<br>(71.2-73.5) | 73.6<br>(72.3-75.1) |
| Cape Verde                  | 49.2<br>(47.3-51.0) | 51.2<br>(49.8-52.7) | 52.4<br>(49.9-52.5) | 52.4<br>(51.4-53.4) | 53.3<br>(52.2-54.3) | 53.5<br>(52.4-54.6) | 52.1<br>(50.9-53.5) | 53.8<br>(52.5-55.3) | 56.5<br>(55.0-57.9) | 59.8<br>(58.2-61.4) |
| Chad                        | 50.9<br>(49.9-51.9) | 53.5<br>(52.6-54.4) | 56.0<br>(55.1-56.8) | 56.3<br>(55.4-57.2) | 54.8<br>(53.7-55.7) | 52.5<br>(51.2-53.8) | 52.4<br>(51.1-53.7) | 53.5<br>(52.1-54.9) | 56.2<br>(54.7-57.7) | 59.9<br>(58.4-61.3) |
| Cote d'Ivoire               | 55.0<br>(53.0-56.9) | 56.8<br>(55.1-58.6) | 58.7<br>(57.1-60.3) | 60.4<br>(59.0-61.8) | 61.6<br>(60.3-62.9) | 62.7<br>(61.5-63.9) | 63.3<br>(62.2-64.5) | 64.3<br>(63.1-65.4) | 65.5<br>(64.4-66.7) | 67.3<br>(66.1-68.7) |
| The Gambia                  | 55.2<br>(53.9-56.5) | 56.7<br>(55.5-58.0) | 57.5<br>(56.3-58.9) | 57.9<br>(56.7-60.0) | 58.8<br>(57.6-60.0) | 59.5<br>(58.2-60.8) | 59.3<br>(58.0-60.7) | 60.1<br>(58.9-61.4) | 62.2<br>(61.0-63.4) | 66.0<br>(64.7-67.5) |
| Ghana                       | 45.1<br>(42.3-47.7) | 46.1<br>(44.0-48.2) | 48.1<br>(46.5-49.7) | 49.8<br>(48.5-51.1) | 51.9<br>(50.7-53.1) | 53.3<br>(52.2-54.5) | 54.7<br>(53.5-55.8) | 56.2<br>(54.8-57.5) | 58.0<br>(56.4-59.6) | 60.7<br>(58.8-62.5) |
| Guinea                      | 40.1<br>(36.9-43.3) | 44.9<br>(42.7-47.0) | 46.6<br>(44.7-48.5) | 47.5<br>(46.0-49.3) | 49.2<br>(47.7-50.6) | 50.8<br>(49.5-52.2) | 52.2<br>(50.9-53.6) | 53.1<br>(51.6-54.7) | 55.6<br>(54.1-57.1) | 58.8<br>(57.2-60.1) |
| Guinea-Bissau               | 47.5<br>(45.7-49.4) | 49.8<br>(48.3-51.4) | 51.5<br>(50.2-52.8) | 52.3<br>(51.1-53.5) | 49.8<br>(48.7-51.0) | 50.3<br>(49.3-51.3) | 54.4<br>(53.4-55.6) | 58.1<br>(57.1-59.3) | 60.8<br>(59.8-61.7) | 64.4<br>(63.4-65.3) |
| Liberia                     | 39.8<br>(38.0-41.9) | 41.6<br>(40.0-43.3) | 44.9<br>(43.5-46.1) | 47.2<br>(46.1-48.4) | 49.3<br>(48.3-50.4) | 51.2<br>(50.1-52.4) | 53.3<br>(52.1-54.6) | 56.5<br>(55.3-57.8) | 59.4<br>(57.8-61.1) | 61.8<br>(59.6-64.2) |
| Mali                        | 54.2<br>(52.0-56.4) | 54.7<br>(52.7-56.9) | 57.1<br>(55.5-58.9) | 58.6<br>(57.4-59.9) | 59.9<br>(58.9-61.1) | 61.5<br>(60.5-62.6) | 63.6<br>(62.5-64.7) | 65.6<br>(64.2-67.0) | 68.1<br>(66.5-69.9) | 70.2<br>(68.3-72.4) |
| Mauritania                  | 43.6<br>(41.6-45.7) | 43.3<br>(41.6-44.8) | 43.9<br>(42.4-45.2) | 44.7<br>(43.4-46.0) | 47.1<br>(45.8-48.3) | 49.0<br>(47.7-50.3) | 52.2<br>(51.0-53.4) | 55.6<br>(54.1-57.0) | 58.8<br>(57.2-60.5) | 61.7<br>(59.7-63.7) |
| Niger                       | 50.1<br>(47.8-52.2) | 52.5<br>(50.7-54.4) | 54.6<br>(53.0-56.2) | 55.6<br>(54.1-57.0) | 54.9<br>(53.3-56.3) | 54.7<br>(52.9-56.5) | 54.9<br>(53.1-56.9) | 56.8<br>(55.2-58.6) | 60.5<br>(58.8-62.3) | 65.0<br>(63.2-67.0) |
| Nigeria                     | 58.4<br>(57.6-59.3) | 61.6<br>(60.6-62.5) | 63.0<br>(62.2-63.8) | 62.4<br>(61.5-63.3) | 63.3<br>(62.1-64.5) | 63.8<br>(62.6-65.0) | 64.5<br>(63.5-65.5) | 66.1<br>(65.1-67.1) | 68.9<br>(67.9-70.0) | 70.6<br>(69.1-72.1) |
| Sao Tome and Principe       | 47.5<br>(46.4-48.5) | 49.3<br>(48.3-50.2) | 49.3<br>(51.4-53.2) | 55.5<br>(54.5-56.3) | 57.5<br>(56.8-58.3) | 58.4<br>(57.6-59.2) | 59.7<br>(58.9-60.5) | 61.7<br>(60.9-62.6) | 64.0<br>(63.3-64.8) | 66.2<br>(65.3-67.1) |
| Senegal                     | 45.6<br>(42.7-48.0) | 47.2<br>(44.8-49.4) | 48.2<br>(46.3-49.9) | 49.2<br>(47.8-50.5) | 50.5<br>(49.3-51.7) | 50.9<br>(49.3-52.5) | 50.9<br>(49.8-52.0) | 52.4<br>(51.3-53.6) | 55.0<br>(53.8-56.3) | 59.1<br>(57.6-60.6) |
| Sierra Leone                | 51.9<br>(50.3-53.3) | 54.0<br>(52.7-55.3) | 56.7<br>(54.8-57.0) | 57.4<br>(55.6-57.7) | 57.4<br>(56.4-58.4) | 57.2<br>(56.1-58.3) | 56.3<br>(54.8-58.0) | 56.3<br>(54.9-58.1) | 58.7<br>(57.4-60.1) | 62.6<br>(61.3-63.9) |
| Togo                        | 48.3<br>(47.3-49.3) | 49.4<br>(48.6-50.3) | 50.6<br>(49.8-51.4) | 51.0<br>(50.3-51.6) | 51.2<br>(50.7-51.7) | 51.0<br>(50.4-51.6) | 51.5<br>(50.9-52.1) | 54.8<br>(54.3-55.4) | 59.0<br>(58.2-59.6) | 63.4<br>(62.5-64.3) |
| Eastern Sub-Saharan Africa  | 44.7<br>(42.6-46.9) | 45.2<br>(43.4-47.2) | 46.3<br>(44.5-48.2) | 47.6<br>(45.9-49.5) | 48.0<br>(46.1-49.8) | 47.9<br>(45.2-48.7) | 47.9<br>(46.2-49.5) | 53.1<br>(51.6-54.5) | 57.7<br>(56.0-59.5) | 60.3<br>(57.9-62.7) |
| Burundi                     | 51.1<br>(48.4-53.7) | 52.9<br>(50.8-54.9) | 54.5<br>(52.6-56.3) | 56.6<br>(55.0-58.2) | 58.6<br>(57.4-60.2) | 60.0                |                     |                     |                     |                     |

Appendix Table 13A. Estimates of life expectancy at birth by location, both sexes combined, 1970, 1975, 1980, 1985, 1990, 1995, 2000, 2005, 2010, 2016

| Location                         | 1970                | 1975                | 1980                | 1985                | 1990                | 1995                | 2000                | 2005                | 2010                | 2016                |
|----------------------------------|---------------------|---------------------|---------------------|---------------------|---------------------|---------------------|---------------------|---------------------|---------------------|---------------------|
| Djibouti                         | 59.7<br>(58.0-61.5) | 60.8<br>(59.3-62.3) | 61.1<br>(59.7-62.4) | 61.0<br>(59.8-62.2) | 61.2<br>(60.2-62.1) | 61.3<br>(60.1-62.4) | 61.3<br>(59.7-63.3) | 62.0<br>(59.6-64.1) | 63.6<br>(61.5-65.8) | 66.7<br>(64.7-68.9) |
| Eritrea                          | 45.3<br>(43.2-47.2) | 47.0<br>(45.6-48.5) | 48.5<br>(47.2-49.7) | 49.8<br>(48.6-51.0) | 52.3<br>(51.1-53.6) | 56.5<br>(55.3-57.8) | 58.1<br>(56.8-59.4) | 60.4<br>(59.0-61.9) | 61.6<br>(60.1-63.2) | 63.7<br>(62.1-65.3) |
| Ethiopia                         | 43.7<br>(41.9-45.5) | 43.6<br>(41.9-45.3) | 44.6<br>(43.0-46.2) | 45.8<br>(44.6-47.2) | 46.6<br>(45.7-47.6) | 49.9<br>(48.8-50.9) | 51.1<br>(50.1-52.2) | 56.1<br>(54.8-57.3) | 61.3<br>(59.8-62.8) | 65.6<br>(63.9-67.5) |
| Kenya                            | 57.9<br>(57.3-58.6) | 59.8<br>(59.2-60.5) | 61.7<br>(61.0-62.3) | 62.6<br>(62.0-63.2) | 61.4<br>(60.8-62.0) | 57.2<br>(56.5-58.0) | 55.2<br>(54.5-55.9) | 57.4<br>(56.8-58.0) | 62.8<br>(62.1-63.3) | 66.8<br>(66.1-67.6) |
| Madagascar                       | 50.7<br>(49.0-52.3) | 53.1<br>(51.6-54.6) | 54.8<br>(53.3-56.2) | 54.2<br>(52.9-55.5) | 55.6<br>(54.5-56.7) | 56.9<br>(55.7-57.9) | 58.5<br>(57.2-59.6) | 60.1<br>(58.7-61.4) | 60.8<br>(59.0-62.9) | 62.7<br>(60.4-65.2) |
| Malawi                           | 43.5<br>(41.1-45.6) | 46.4<br>(44.6-48.2) | 49.4<br>(47.8-50.9) | 50.0<br>(48.3-51.5) | 48.7<br>(46.3-51.0) | 46.0<br>(43.3-49.0) | 44.7<br>(42.1-47.8) | 47.6<br>(45.3-50.5) | 53.0<br>(51.0-55.3) | 60.2<br>(58.0-62.6) |
| Mozambique                       | 47.6<br>(45.5-49.6) | 49.5<br>(48.0-51.1) | 50.3<br>(49.1-51.4) | 45.1<br>(42.3-48.2) | 50.7<br>(49.8-51.7) | 51.3<br>(49.7-52.7) | 51.4<br>(49.2-53.6) | 52.4<br>(49.8-55.0) | 54.5<br>(52.2-56.9) | 60.0<br>(57.9-61.9) |
| Rwanda                           | 46.6<br>(44.6-48.5) | 47.3<br>(45.5-49.0) | 49.9<br>(48.3-51.6) | 52.3<br>(50.9-53.7) | 49.1<br>(47.7-50.6) | 44.6<br>(42.8-46.3) | 49.4<br>(47.9-51.0) | 57.8<br>(56.5-59.2) | 64.7<br>(63.4-66.1) | 67.8<br>(66.1-69.4) |
| Somalia                          | 49.7<br>(47.0-52.2) | 47.9<br>(45.1-50.5) | 50.7<br>(48.5-52.8) | 50.2<br>(48.2-52.0) | 50.6<br>(48.7-52.3) | 51.3<br>(49.7-53.2) | 52.0<br>(50.2-53.8) | 53.8<br>(52.0-55.7) | 53.1<br>(50.7-55.3) | 57.1<br>(54.9-59.2) |
| South Sudan                      | 49.1<br>(44.1-53.5) | 50.2<br>(46.0-54.0) | 51.2<br>(48.1-54.3) | 51.4<br>(48.9-54.0) | 51.5<br>(49.3-53.9) | 53.3<br>(51.0-55.8) | 54.5<br>(52.1-57.2) | 56.6<br>(53.9-59.5) | 58.1<br>(55.4-61.2) | 59.7<br>(57.0-62.6) |
| Tanzania                         | 52.3<br>(50.9-53.6) | 54.2<br>(53.1-55.4) | 55.8<br>(54.7-56.9) | 56.4<br>(55.3-57.3) | 54.9<br>(53.6-56.1) | 52.9<br>(51.1-54.8) | 52.9<br>(51.2-55.0) | 55.3<br>(53.7-57.3) | 59.3<br>(57.8-61.0) | 64.3<br>(62.8-65.9) |
| Uganda                           | 50.3<br>(48.9-51.7) | 51.3<br>(50.2-52.5) | 49.4<br>(47.4-51.3) | 49.9<br>(47.9-51.6) | 49.1<br>(47.0-51.0) | 46.9<br>(44.6-49.3) | 48.7<br>(47.2-50.3) | 52.8<br>(51.5-54.0) | 56.8<br>(55.4-58.1) | 62.2<br>(60.8-63.8) |
| Zambia                           | 55.6<br>(52.3-59.0) | 57.6<br>(54.9-60.6) | 57.7<br>(55.5-60.0) | 56.2<br>(54.2-58.4) | 52.1<br>(50.0-54.1) | 46.4<br>(43.7-48.9) | 44.1<br>(41.7-46.7) | 46.0<br>(43.8-48.2) | 52.0<br>(49.9-53.9) | 58.6<br>(56.0-61.3) |
| Central Sub-Saharan Africa       | 49.6<br>(46.7-52.3) | 50.8<br>(48.5-53.2) | 51.8<br>(50.2-53.4) | 53.0<br>(51.8-54.3) | 52.6<br>(51.6-53.7) | 52.4<br>(51.3-53.4) | 52.8<br>(51.6-53.9) | 55.0<br>(54.0-56.1) | 57.6<br>(56.5-58.8) | 61.7<br>(60.1-63.2) |
| Angola                           | 48.6<br>(44.6-52.9) | 49.5<br>(45.8-53.3) | 49.9<br>(46.8-53.1) | 50.2<br>(47.5-53.3) | 50.2<br>(47.6-53.0) | 51.9<br>(49.3-55.0) | 53.3<br>(50.6-56.5) | 56.4<br>(53.5-59.4) | 60.0<br>(57.0-63.1) | 64.6<br>(61.0-67.8) |
| Central African Republic         | 48.2<br>(45.6-50.6) | 48.4<br>(46.1-50.7) | 49.6<br>(47.5-51.5) | 49.9<br>(48.0-51.6) | 48.1<br>(46.2-49.9) | 46.1<br>(43.8-48.5) | 44.4<br>(41.7-47.0) | 44.9<br>(42.5-47.6) | 47.4<br>(44.8-50.2) | 50.2<br>(47.3-53.3) |
| Congo                            | 48.8<br>(45.4-51.9) | 51.0<br>(47.8-53.9) | 53.0<br>(50.6-55.5) | 55.0<br>(53.0-57.0) | 54.0<br>(52.5-55.6) | 52.6<br>(51.2-54.2) | 52.8<br>(51.3-54.3) | 56.5<br>(55.0-58.0) | 60.3<br>(58.5-62.2) | 62.9<br>(60.5-65.5) |
| Democratic Republic of the Congo | 50.3<br>(46.8-53.6) | 51.6<br>(48.6-54.3) | 52.6<br>(50.4-54.8) | 54.2<br>(52.7-55.7) | 53.8<br>(52.3-55.3) | 53.1<br>(51.6-54.5) | 53.4<br>(51.8-54.8) | 57.5<br>(54.0-56.6) | 57.5<br>(56.0-58.9) | 61.6<br>(59.6-63.3) |
| Equatorial Guinea                | 44.2<br>(40.0-48.4) | 46.0<br>(42.7-49.5) | 48.6<br>(45.8-51.7) | 49.3<br>(46.6-52.2) | 48.1<br>(45.4-51.1) | 47.8<br>(44.8-51.0) | 47.8<br>(50.8-58.1) | 54.3<br>(53.9-62.8) | 58.1<br>(56.9-65.5) | 60.9<br>(61.2-70.0) |
| Gabon                            | 52.0<br>(49.3-54.8) | 55.1<br>(52.7-57.6) | 57.7<br>(55.9-59.7) | 59.1<br>(57.6-60.7) | 59.4<br>(58.1-60.7) | 59.6<br>(58.3-60.9) | 59.1<br>(57.6-60.7) | 59.9<br>(58.2-61.5) | 62.8<br>(61.0-64.6) | 66.5<br>(64.4-68.7) |

Appendix Table 13B. Estimates of life expectancy at birth by location, males, 1970, 1975, 1980, 1985, 1990, 1995, 2000, 2005, 2010, 2016

| Location                  | 1970                | 1975                | 1980                | 1985                | 1990                | 1995                | 2000                | 2005                | 2010                | 2016                |
|---------------------------|---------------------|---------------------|---------------------|---------------------|---------------------|---------------------|---------------------|---------------------|---------------------|---------------------|
| Global                    | 56.3<br>(55.6-57.0) | 58.2<br>(57.7-58.7) | 59.9<br>(59.5-60.3) | 61.4<br>(61.1-61.7) | 62.7<br>(62.4-63.0) | 63.2<br>(62.9-63.5) | 64.4<br>(64.1-64.6) | 65.9<br>(65.6-66.1) | 67.8<br>(67.4-68.1) | 69.8<br>(69.3-70.2) |
| High SDI                  | 67.6<br>(67.4-67.9) | 68.8<br>(68.6-69.0) | 70.1<br>(70.0-70.2) | 71.3<br>(71.2-71.4) | 72.3<br>(72.2-72.4) | 73.3<br>(73.2-73.4) | 74.8<br>(74.7-74.9) | 76.1<br>(76.0-76.1) | 77.3<br>(77.2-77.4) | 78.1<br>(77.8-78.3) |
| High-middle SDI           | 61.8<br>(61.1-62.4) | 63.3<br>(62.8-63.9) | 63.9<br>(63.4-64.5) | 65.6<br>(65.1-66.0) | 66.4<br>(65.9-66.9) | 65.4<br>(64.9-66.0) | 67.0<br>(66.5-67.6) | 68.5<br>(68.0-69.0) | 71.2<br>(70.8-71.7) | 73.1<br>(72.0-74.1) |
| Middle SDI                | 57.3<br>(56.5-58.1) | 59.9<br>(59.4-60.4) | 61.4<br>(61.0-61.8) | 63.1<br>(62.7-63.5) | 64.4<br>(64.1-64.8) | 65.5<br>(65.2-65.8) | 66.6<br>(66.4-66.9) | 68.0<br>(67.8-68.3) | 69.6<br>(69.3-69.8) | 71.2<br>(70.9-71.6) |
| Low-middle SDI            | 49.0<br>(47.9-50.0) | 51.5<br>(50.6-52.4) | 54.4<br>(53.8-55.1) | 56.4<br>(55.8-56.9) | 58.1<br>(57.6-58.6) | 59.1<br>(58.6-59.5) | 60.1<br>(59.7-60.6) | 61.7<br>(61.2-62.1) | 63.7<br>(63.2-64.2) | 65.9<br>(65.3-66.5) |
| Low SDI                   | 46.5<br>(45.0-48.0) | 47.9<br>(47.0-49.0) | 49.1<br>(48.3-50.0) | 50.0<br>(49.1-50.9) | 51.2<br>(50.6-51.8) | 51.9<br>(51.3-52.5) | 53.0<br>(52.4-53.5) | 55.7<br>(55.1-56.3) | 57.7<br>(56.7-58.7) | 61.8<br>(60.9-62.7) |
| High-income               | 67.4<br>(67.2-67.7) | 68.7<br>(68.5-68.9) | 70.3<br>(70.2-70.4) | 71.6<br>(71.5-71.7) | 72.6<br>(72.5-72.8) | 73.6<br>(73.5-73.7) | 75.1<br>(75.0-75.2) | 76.3<br>(76.2-76.4) | 77.6<br>(77.5-77.7) | 78.3<br>(78.0-78.5) |
| High-income North America | 67.3<br>(67.1-67.4) | 68.7<br>(68.6-68.8) | 70.3<br>(70.2-70.4) | 71.4<br>(71.3-71.5) | 72.1<br>(72.0-72.3) | 72.9<br>(72.8-73.0) | 74.5<br>(74.4-74.6) | 75.4<br>(75.3-75.5) | 76.6<br>(76.5-76.7) | 76.8<br>(76.5-77.0) |
| Canada                    | 69.3<br>(68.9-69.7) | 70.0<br>(69.7-70.4) | 71.7<br>(71.4-72.1) | 73.2<br>(72.8-73.5) | 74.2<br>(73.9-74.5) | 75.1<br>(74.8-75.4) | 76.6<br>(76.3-76.9) | 77.8<br>(77.6-78.1) | 79.1<br>(78.8-79.4) | 79.8<br>(79.3-80.2) |
| Greenland                 | 60.4<br>(59.1-61.7) | 59.8<br>(58.6-60.9) | 58.1<br>(56.9-59.3) | 57.8<br>(56.6-58.9) | 57.7<br>(56.3-59.1) | 61.3<br>(60.0-62.5) | 63.0<br>(61.8-64.1) | 64.2<br>(63.1-65.4) | 66.6<br>(65.3-67.8) | 67.8<br>(64.7-70.6) |
| United States             | 67.1<br>(66.9-67.2) | 68.6<br>(68.5-68.7) | 70.2<br>(70.0-70.3) | 71.2<br>(71.1-71.3) | 71.9<br>(71.8-72.1) | 72.7<br>(72.5-72.8) | 74.2<br>(74.1-74.3) | 75.1<br>(75.0-75.2) | 76.3<br>(76.2-76.4) | 76.5<br>(76.2-76.7) |
| Australasia               | 67.9<br>(67.7-68.2) | 69.2<br>(68.9-69.4) | 70.9<br>(70.6-71.1) | 72.2<br>(71.9-72.4) | 73.8<br>(73.5-74.0) | 75.2<br>(75.0-75.4) | 76.9<br>(76.6-77.1) | 78.5<br>(78.3-78.8) | 79.7<br>(79.4-79.9) | 80.3<br>(79.6-81.0) |
| Australia                 | 67.8<br>(67.5-68.1) | 69.2<br>(68.9-69.5) | 71.1<br>(70.8-71.4) | 72.4<br>(72.1-72.7) | 74.0<br>(73.7-74.2) | 75.4<br>(75.2-75.7) | 77.0<br>(76.8-77.3) | 78.7<br>(78.5-79.0) | 79.8<br>(79.5-80.0) | 80.5<br>(79.7-81.2) |
| New Zealand               | 68.4<br>(68.1-68.8) | 69.0<br>(68.6-69.3) | 70.0<br>(69.7-70.4) | 71.0<br>(70.7-71.3) | 72.7<br>(72.4-73.1) | 74.2<br>(73.9-74.6) | 76.0<br>(75.7-76.3) | 77.8<br>(77.5-78.1) | 79.0<br>(78.7-79.3) | 79.5<br>(78.3-80.8) |
| High-income Asia Pacific  | 66.7<br>(65.3-68.0) | 68.0<br>(68.1-69.9) | 69.7<br>(70.6-71.6) | 71.2<br>(72.3-73.1) | 72.9<br>(73.7-74.5) | 74.1<br>(74.7-75.5) | 75.1<br>(76.1-76.7) | 76.4<br>(77.5-78.1) | 77.8<br>(78.6-79.2) | 80.1<br>(79.1-80.9) |
| Brunei                    | 65.0<br>(63.4-66.8) | 68.2<br>(66.3-69.6) | 68.7<br>(66.9-71.9) | 70.5<br>(69.3-71.7) | 71.7<br>(70.7-72.8) | 72.5<br>(71.3-73.6) | 73.8<br>(72.8-74.6) | 74.7<br>(73.9-75.7) | 74.9<br>(74.1-75.8) | 74.6<br>(72.5-77.3) |
| Japan                     | 69.6<br>(69.2-70.0) | 71.7<br>(71.4-72.0) | 73.5<br>(73.4-73.5) | 74.8<br>(74.8-74.9) | 75.9<br>(75.9-76.0) | 76.5<br>(76.3-76.6) | 77.5<br>(77.5-77.6) | 78.5<br>(78.5-78.6) | 79.5<br>(79.4-79.5) | 80.8<br>(80.6-81.1) |
| Singapore                 | 65.5<br>(63.9-67.0) | 67.8<br>(65.7-68.7) | 69.5<br>(67.3-70.4) | 70.5<br>(68.7-72.1) | 71.9<br>(71.3-74.4) | 72.9<br>(73.5-76.3) | 73.9<br>(75.4-78.6) | 74.9<br>(77.2-80.0) | 75.9<br>(78.7-81.6) | 76.9<br>(78.8-83.7) |
| South Korea               | 58.0<br>(53.2-63.6) | 60.3<br>(57.2-63.8) | 63.0<br>(61.4-64.9) | 65.3<br>(63.6-66.8) | 67.7<br>(66.2-69.3) | 69.2<br>(68.6-71.7) | 70.2<br>(71.0-73.7) | 72.3<br>(73.7-76.4) | 75.0<br>(75.6-78.2) | 77.7<br>(74.3-81.5) |
| Western Europe            | 68.5<br>(68.3-68.6) | 69.4<br>(69.2-69.5) | 70.6<br>(70.5-70.8) | 71.9<br>(71.7-72.0) | 72.9<br>(72.8-73.1) | 74.0<br>(73.9-74.2) | 75.5<br>(75.3-75.6) | 76.9<br>(76.8-77.1) | 78.3<br>(78.1-78.4) | 79.3<br>(78.9-79.5) |
| Andorra                   | 71.8<br>(68.1-75.5) | 73.7<br>(70.8-77.4) | 75.4<br>(72.9-78.3) | 75.8<br>(73.5-78.8) | 77.2<br>(74.0-78.8) | 77.2<br>(74.9-79.4) | 78.5<br>(76.4-80.4) | 79.0<br>(77.4-80.8) | 79.4<br>(77.6-81.3) | 79.4<br>(77.4-81.9) |
| Austria                   | 66.6<br>(66.3-66.9) | 67.7<br>(67.4-68.0) | 69.0<br>(68.7-69.3) | 70.4<br>(70.1-70.7) | 72.1<br>(71.9-72.4) | 73.4<br>(73.1-73.7) | 75.1<br>(74.8-75.3) | 76.7<br>(76.4-76.9) | 78.1<br>(77.6-78.1) | 79.1<br>(78.5-79.9) |
| Belgium                   | 67.8<br>(67.3-68.2) | 68.8<br>(68.4-69.3) | 69.8<br>(69.4-70.3) | 71.1<br>(70.7-71.6) | 72.6<br>(72.1-73.1) | 73.6<br>(73.1-74.0) | 74.6<br>(74.2-75.1) | 76.2<br>(75.8-76.7) | 77.4<br>(76.9-77.8) | 78.4<br>(77.2-79.5) |
| Cyprus                    | 68.4<br>(67.6-69.1) | 69.4<br>(68.8-70.0) | 71.2<br>(70.7-71.7) | 72.2<br>(71.7-72.7) | 72.9<br>(72.4-73.4) | 73.5<br>(73.0-74.0) | 74.4<br>(73.9-74.9) | 75.5<br>(75.0-76.1) | 76.9<br>(76.9-78.0) | 78.1<br>(77.5-78.8) |
| Denmark                   | 70.8<br>(70.0-71.6) | 71.3<br>(70.5-72.1) | 71.4<br>(70.5-72.2) | 71.8<br>(71.0-72.6) | 72.4<br>(71.7-73.3) | 73.0<br>(72.3-73.8) | 74.6<br>(73.8-75.3) | 75.8<br>(75.1-76.6) | 77.4<br>(76.7-78.2) | 78.8<br>(77.3-80.1) |
| Finland                   | 65.9<br>(65.0-66.3) | 67.3<br>(67.0-67.7) | 69.2<br>(68.8-69.6) | 70.3<br>(70.0-70.7) | 71.0<br>(70.6-71.3) | 72.9<br>(72.5-73.3) | 74.3<br>(73.9-74.6) | 75.5<br>(75.1-75.9) | 76.8<br>(76.4-77.1) | 78.9<br>(78.0-79.8) |
| France                    | 68.7<br>(68.4-69.2) | 69.3<br>(68.9-69.7) | 70.5<br>(70.1-70.9) | 71.8<br>(71.4-72.2) | 73.1<br>(72.7-73.5) | 74.1<br>(73.8-74.4) | 75.3<br>(75.0-75.7) | 76.8<br>(76.5-77.2) | 78.1<br>(77.8-78.5) | 79.2<br>(78.6-79.8) |
| Germany                   | 67.6<br>(66.9-68.3) | 68.4<br>(67.7-69.0) | 69.7<br>(69.1-70.3) | 71.0<br>(70.4-71.7) | 72.2<br>(71.4-72.7) | 73.2<br>(72.6-73.9) | 74.8<br>(74.3-75.4) | 76.4<br>(75.8-77.0) | 78.5<br>(76.9-78.1) | 80.6<br>(77.4-83.5) |
| Greece                    | 71.5<br>(71.1-71.9) | 72.4<br>(72.0-72.7) | 74.9<br>(74.5-75.3) | 73.7<br>(73.4-74.0) | 74.5<br>(74.1-74.9) | 75.0<br>(74.7-75.4) | 75.8<br>(75.5-76.2) | 76.9<br>(76.5-77.2) | 77.7<br>(77.4-78.0) | 77.7<br>(77.5-79.5) |
| Iceland                   | 72.2<br>(70.6-71.7) | 72.7<br>(71.7-72.7) | 74.5<br>(73.2-74.3) | 75.7<br>(74.0-75.1) | 76.4<br>(75.1-76.2) | 77.9<br>(75.8-77.0) | 79.4<br>(77.4-78.4) | 80.2<br>(78.9-79.9) | 80.6<br>(79.7-80.7) | 80.6<br>(79.7-81.4) |
| Ireland                   | 68.8<br>(68.1-69.5) | 69.1<br>(68.4-69.7) | 71.0<br>(69.1-70.4) | 72.2<br>(70.3-71.6) | 73.6<br>(71.6-72.9) | 74.0<br>(72.5-73.7) | 76.0<br>(73.4-74.6) | 77.6<br>(76.0-77.2) | 78.2<br>(77.6-78.8) | 79.0<br>(77.5-80.4) |
| Israel                    | 67.3<br>(65.4-69.4) | 69.7<br>(68.4-71.0) | 71.8<br>(70.5-73.1) | 72.6<br>(71.4-73.9) | 74.1<br>(73.0-75.3) | 75.0<br>(73.7-76.2) | 76.3<br>(75.0-77.7) | 77.6<br>(76.4-78.7) | 79.0<br>(78.2-80.5) | 80.0<br>(77.8-82.3) |
| Italy                     | 68.6<br>(68.2-68.9) | 69.7<br>(69.4-70.0) | 70.7<br>(70.4-71.0) | 72.4<br>(72.1-72.7) | 73.7<br>(73.4-74.0) | 74.8<br>(74.5-75.1) | 76.5<br>(76.3-76.8) | 78.0<br>(77.8-78.3) | 79.9<br>(79.1-80.7) | 81.3<br>(79.1-80.7) |
| Luxembourg                | 66.4<br>(65.9-66.9) | 67.7<br>(67.2-68.2) | 69.1<br>(68.6-69.6) | 70.3<br>(69.8-70.8) | 71.8<br>(71.3-72.2) | 73.5<br>(73.3-73.9) | 75.2<br>(74.8-75.8) | 77.3<br>(76.8-77.8) | 79.2<br>(78.7-79.6) | 80.3<br>(79.1-81.4) |
| Malta                     | 67.3<br>(66.3-68.4) | 68.6<br>(67.6-69.6) | 69.6<br>(68.5-70.5) | 71.6<br>(70.6-72.6) | 73.7<br>(72.7-74.7) | 74.8<br>(73.8-75.8) | 75.1<br>(74.2-76.1) | 77.0<br>(76.1-78.0) | 79.0<br>(78.0-79.0) | 79.0<br>(77.1-81.0) |
| Netherlands               | 71.0<br>(70.4-71.6) | 71.5<br>(71.0-72.1) | 73.5<br>(72.5-73.0) | 75.1<br>(74.2-73.6) | 76.9<br>(73.4-74.3) | 78.4<br>(74.2-75.1) | 79.4<br>(75.1-76.1) | 80.2<br>(76.7-77.7) | 80.2<br>(78.3-79.2) | 80.6<br>(78.6-80.6) |
| Norway                    | 71.0<br>(70.4-71.6) | 71.7<br>(71.2-72.2) | 72.4<br>(71.8-72.9) | 72.7<br>(72.2-73.3) | 73.6<br>(73.1-74.2) | 75.1<br>(74.6-75.6) | 76.0<br>(75.5-76.5) | 77.8<br>(77.3-78.3) | 78.9<br>(78.4-79.3) | 80.1<br>(79.0-81.3) |
| Portugal                  | 64.2<br>(63.8-64.6) | 66.4<br>(66.0-66.9) | 68.1<br>(67.7-68.5) | 69.7<br>(69.3-70.0) | 70.7<br>(70.3-71.1) | 71.6<br>(71.2-72.0) | 73.1<br>(72.7-73.5) | 74.9<br>(74.5-75.4) | 76.6<br>(76.3-77.0) | 77.8<br>(76.9-78.7) |
| Spain                     | 69.1<br>(68.9-69.4) | 70.6<br>(70.3-70.8) | 72.3<br>(72.1-72.5) | 73.2<br>(72.9-73.4) | 73.6<br>(73.3-73.9) | 74.5<br>(74.2-74.8) | 75.9<br>(75.7-76.2) | 77.2<br>(77.0-77.4) | 79.0<br>(78.8-79.2) | 80.3<br>(79.7-80.8) |
| Sweden                    | 72.1<br>(71.3-72.9) | 72.2<br>(71.5-72.8) | 72.8<br>(72.4-73.2) | 73.9<br>(73.5-74.3) | 74.9<br>(74.5-75.3) | 76.3<br>(75.9-76.6) | 77.4<br>(77.0-77.7) | 78.4<br>(78.0-78.7) | 79.5<br>(79.2-79.9) | 80.1<br>(78.8-81.4) |
| Stockholm                 | 71.8<br>(68.9-74.6) | 71.6<br>(69.4-73.7) | 72.1<br>(71.2-72.8) | 73.4<br>(72.7-74.0) | 74.1<br>(73.5-74.8) | 75.9<br>(75.3-76.5) | 77.3<br>(76.8-77.9) | 78.6<br>(78.0-79.1) | 79.8<br>(79.2-80.3) | 80.3<br>(78.0-82.6) |
| Sweden except Stockholm   | 72.1<br>(71.4-72.9) | 72.3<br>(71.7-72.9) | 73.0<br>(72.5-73.5) | 74.0<br>(73.5-74.5) | 75.0<br>(74.6-75.5) | 76.4<br>(75.9-76.8) | 77.4<br>(76.9-77.8) | 78.3<br>(77.9-78.8) | 79.4<br>(79.0-79.9) | 80.1<br>(78.5-81.5) |
| Switzerland               | 70.0<br>(69.2-70.8) | 71.4<br>(70.6-72.3) | 72.4<br>(71.6-73.2) | 73.6<br>(72.8-74.4) | 74.0<br>(73.2-74.7) | 75.3<br>(74.5-76.1) | 77.1<br>(76.4-77.9) | 78.7<br>(77.9-79.4) | 80.0<br>(79.3-80.7) | 81.0<br>(78.1-83.6) |
| United Kingdom            | 68.7<br>(68.5-68.9) | 69.4<br>(69.2-69.6) | 70.5<br>(70.4-70.7) | 71.6<br>(71.5-71.8) | 72.9<br>(72.7-73.0) | 74.0<br>(73.8-74.1) | 75.3<br>(75.2-75.5) | 76.8<br>(76.7-77.0) | 78.3<br>(78.2-78.5) | 78.9<br>(78.7-79.1) |
| England                   | 69.0<br>(68.8-69.2) | 69.7<br>(69.5-69.9) | 70.8<br>(70.7-70.9) | 71.9<br>(71.8-72.0) | 73.1<br>(73.0-73.2) | 74.3<br>(74.2-74.4) | 75.6<br>(75.5-75.7) | 77.1<br>(77.1-77.2) | 78.6<br>(78.6-78.7) | 79.2<br>(79.1-79.4) |
| East Midlands             | 68.9<br>(68.1-69.6) | 69.6<br>(69.0-70.3) | 70.8<br>(70.3-71.3) | 72.0<br>(71.7-72.3) | 73.2<br>(72.9-73.5) | 74.3<br>(74.0-74.7) | 75.7<br>(75.4-76.1) | 77.1<br>(76.8-77.4) | 78.5<br>(78.2-78.8) | 79.1<br>(78.6-79.6) |
| East of England           | 70.2<br>(69.4-71.0) | 71.0<br>(70.3-71.6) | 72.1<br>(71.6-72.6) | 73.1<br>(72.8-73.4) | 74.4<br>(74.1-74.8) | 75.5<br>(75.2-75.8) | 76.7<br>(76.4-77.1) | 78.2<br>(77.9-78.5) | 79.6<br>(79.3-80.0) | 80.1<br>(79.6-80.6) |
| Greater London            | 69.2<br>(68.8-69.6) | 69.8<br>(69.5-70.2) | 70.7<br>(70.5-71.0) | 71.8<br>(71.6-72.0) | 72.9<br>(72.7-73.1) | 73.8<br>(73.6-74.0) | 75.3<br>(75.1-75.5) | 77.0<br>(76.8-77.2) | 79.0<br>(78.8-79.1) | 79.7<br>(79.4-79.9) |
| North East England        | 67.5<br>(66.9-68.2) | 68.3<br>(67.7-68.8) | 69.4<br>(69.0-69.8) | 70.5<br>(70.2-70.8) | 71.5<br>(71.3-71.8) | 72.7<br>(72.5-73.0) | 74.1<br>(73.8-74.4) | 75.6<br>(75.3-75.9) | 77.2<br>(76.9-77.5) | 77.8<br>(77.3-78.3) |
| North West England        | 67.7<br>(67.1-68.3) | 68.4<br>(67.8-68.9) | 69.5<br>(69.1-69.8) | 70.6<br>(70.4-70.9) | 71.8<br>(71.5-72.0) | 72.9<br>(72.7-73.1) | 74.2<br>(74.0-74.5) | 75.7<br>(75.5-75.9) | 77.2<br>(77.0-77.5) | 77.9<br>(77.6-78.3) |
| South East England        | 70.3<br>(69.7-70.9) | 71.0<br>(70.4-71.5) | 72.1<br>(71.7-72.5) | 73.1<br>(72.8-73.4) | 74.4<br>(74.1-74.6) | 75.5<br>(75.2-75.8) | 76.8<br>(76.5-77.1) | 78.3<br>(78.1-78.6) | 79.7<br>(79.5-80.0) | 80.2<br>(79.9-80.6) |
| South West England        | 70.2<br>(69.6-70.8) | 70.9<br>(70.4-71.4) | 72.0<br>(71.6-72.3) | 73.1<br>(72.8-73.4) | 74.3<br>(74.1-74.6) | 75.5<br>(75.2-75.7) | 76.8<br>(76.5-77.0) | 78.2<br>(78.0-78.5) | 79.5<br>(79.2-79.7) | 80.0<br>(79.6-80.3) |
| West Midlands             | 68.5<br>(67.9-69.2) | 69.2<br>(68.6-69.9) | 70.2<br>(69.8-70.6) | 71.3<br>(71.0-71.7) | 72.6<br>(72.3-72.8) | 73.9<br>(73.6-74.2) | 75.0<br>(74.7-75.3) | 76.5<br>(76.2-76.7) | 78.1<br>(77.8-78.4) | 78.6<br>(78.1-79.4) |
| Yorkshire and the Humber  | 68.1<br>(67.5-68.8) | 68.9<br>(68.3-69.4) | 70.0<br>(69.6-70.4) | 71.1<br>(70.8-71.4) | 72.5<br>(72.2-72.7) | 73.9<br>(73.4-73.9) | 74.9<br>(74.6-75.1) | 76.5<br>(76.3-76.8) | 78.4<br>(77.6-78.1) | 78.4<br>(78.0-78.8) |
| Northern Ireland          | 67.8<br>(67.1-68.6) | 68.8<br>(66.9-68.4) | 69.0<br>(68.1-69.7) | 70.9<br>(69.2-71.5) | 71.9<br>(70.9-72.9) | 73.2                |                     |                     |                     |                     |

Appendix Table 13B. Estimates of life expectancy at birth by location, males, 1970, 1975, 1980, 1985, 1990, 1995, 2000, 2005, 2010, 2016

| Location                                         | 1970                | 1975                | 1980                | 1985                | 1990                | 1995                | 2000                | 2005                | 2010                | 2016                |
|--------------------------------------------------|---------------------|---------------------|---------------------|---------------------|---------------------|---------------------|---------------------|---------------------|---------------------|---------------------|
| Wales                                            | 68.0<br>(66.0-70.0) | 68.8<br>(67.1-70.6) | 70.0<br>(68.8-71.3) | 71.3<br>(70.4-72.2) | 72.6<br>(71.7-73.3) | 73.6<br>(72.8-74.4) | 74.9<br>(74.0-75.9) | 76.5<br>(75.6-77.3) | 77.6<br>(76.6-78.6) | 77.9<br>(76.4-79.4) |
| Southern Latin America                           | 61.6<br>(61.1-62.2) | 63.9<br>(63.2-64.7) | 66.5<br>(66.1-66.9) | 68.1<br>(67.6-68.5) | 69.0<br>(68.5-69.4) | 70.0<br>(69.6-70.5) | 71.4<br>(71.0-71.8) | 72.6<br>(72.2-73.0) | 73.4<br>(73.0-73.8) | 74.4<br>(73.3-75.4) |
| Argentina                                        | 61.9<br>(61.1-62.5) | 63.8<br>(62.8-64.9) | 66.3<br>(65.8-66.9) | 67.8<br>(67.3-68.4) | 68.5<br>(68.0-69.1) | 69.3<br>(68.7-69.8) | 70.5<br>(70.0-71.0) | 71.7<br>(71.1-72.2) | 72.5<br>(72.1-73.0) | 73.3<br>(72.3-74.4) |
| Chile                                            | 60.3<br>(59.4-61.3) | 64.1<br>(63.3-65.1) | 67.0<br>(66.2-68.1) | 68.8<br>(67.9-69.7) | 70.2<br>(69.3-71.1) | 72.2<br>(71.4-73.1) | 74.3<br>(73.3-75.1) | 75.5<br>(74.7-76.3) | 76.2<br>(75.4-76.9) | 77.3<br>(74.0-80.5) |
| Uruguay                                          | 65.1<br>(64.6-65.5) | 65.3<br>(64.9-65.8) | 66.7<br>(66.2-67.1) | 68.1<br>(67.7-68.5) | 69.1<br>(68.7-69.5) | 69.5<br>(69.1-69.9) | 70.9<br>(70.5-71.3) | 71.8<br>(71.4-72.2) | 72.5<br>(72.0-73.0) | 73.4<br>(72.6-74.4) |
| Central Europe, Eastern Europe, and Central Asia | 63.4<br>(62.7-64.2) | 63.7<br>(63.1-64.4) | 63.2<br>(62.5-63.9) | 64.1<br>(63.5-64.6) | 64.6<br>(63.9-65.2) | 61.1<br>(60.3-62.0) | 62.5<br>(61.7-63.3) | 63.0<br>(62.3-63.9) | 66.2<br>(65.4-66.9) | 68.2<br>(66.1-70.2) |
| Eastern Europe                                   | 63.8<br>(62.7-64.9) | 63.2<br>(62.1-64.3) | 62.2<br>(61.1-63.3) | 63.4<br>(62.5-64.4) | 64.2<br>(63.1-65.3) | 59.0<br>(57.7-60.5) | 60.0<br>(58.8-61.4) | 60.2<br>(59.0-61.5) | 64.0<br>(62.8-65.3) | 66.1<br>(62.6-69.7) |
| Belarus                                          | 66.7<br>(65.8-67.7) | 66.5<br>(65.6-67.4) | 65.5<br>(64.6-66.3) | 65.8<br>(65.1-66.6) | 65.7<br>(64.9-66.5) | 62.6<br>(61.8-63.5) | 62.6<br>(61.8-63.5) | 62.8<br>(62.0-63.6) | 64.5<br>(63.7-65.2) | 68.2<br>(65.6-70.8) |
| Estonia                                          | 65.8<br>(65.1-66.4) | 65.0<br>(64.3-65.7) | 64.2<br>(63.6-64.9) | 64.7<br>(64.0-65.4) | 64.8<br>(64.2-65.5) | 61.6<br>(60.9-62.3) | 65.5<br>(64.8-66.2) | 67.4<br>(66.8-68.1) | 71.1<br>(70.6-71.8) | 73.0<br>(71.3-74.7) |
| Latvia                                           | 65.9<br>(65.1-66.7) | 63.8<br>(63.0-64.7) | 63.8<br>(62.9-64.5) | 64.7<br>(64.0-65.6) | 64.3<br>(63.4-65.2) | 60.3<br>(59.4-61.2) | 64.9<br>(64.0-65.7) | 65.1<br>(64.3-66.0) | 68.0<br>(67.2-68.7) | 70.0<br>(68.1-72.0) |
| Lithuania                                        | 67.0<br>(66.3-67.6) | 66.6<br>(66.0-67.2) | 65.7<br>(65.1-66.3) | 66.0<br>(65.4-66.6) | 66.4<br>(65.8-67.0) | 63.1<br>(62.5-63.8) | 66.6<br>(65.9-67.2) | 65.4<br>(64.8-66.1) | 67.5<br>(66.8-68.2) | 69.7<br>(68.6-70.9) |
| Moldova                                          | 59.3<br>(55.5-63.2) | 60.5<br>(57.3-63.9) | 61.4<br>(59.2-63.5) | 62.1<br>(60.5-63.7) | 63.6<br>(62.3-65.0) | 60.7<br>(59.4-62.0) | 63.8<br>(62.5-65.1) | 64.5<br>(63.1-65.9) | 65.6<br>(64.3-66.9) | 68.3<br>(66.6-70.3) |
| Russia                                           | 62.4<br>(61.7-64.7) | 61.3<br>(60.9-63.9) | 61.3<br>(59.7-62.9) | 62.7<br>(61.3-64.0) | 63.7<br>(62.1-65.3) | 58.0<br>(56.1-59.9) | 59.0<br>(57.3-60.8) | 59.3<br>(57.7-61.1) | 63.4<br>(61.7-65.0) | 65.4<br>(60.8-70.7) |
| Ukraine                                          | 64.9<br>(63.4-66.3) | 67.1<br>(63.3-65.9) | 66.8<br>(62.7-64.9) | 67.0<br>(64.1-65.8) | 67.2<br>(64.2-66.0) | 61.0<br>(60.0-62.0) | 61.7<br>(60.7-62.7) | 61.3<br>(60.3-62.4) | 65.4<br>(64.4-66.4) | 67.0<br>(63.3-71.4) |
| Central Europe                                   | 66.2<br>(65.8-66.5) | 67.1<br>(66.8-67.5) | 66.8<br>(66.5-67.1) | 67.0<br>(66.7-67.2) | 67.2<br>(66.9-67.5) | 67.1<br>(66.9-67.4) | 69.2<br>(69.0-69.5) | 70.5<br>(70.2-70.7) | 71.8<br>(71.6-72.0) | 73.5<br>(72.9-74.0) |
| Albania                                          | 66.0<br>(61.9-69.1) | 68.6<br>(65.8-71.1) | 70.3<br>(68.3-72.0) | 70.7<br>(69.6-71.7) | 71.0<br>(70.3-71.6) | 70.8<br>(70.2-71.4) | 71.4<br>(70.8-71.9) | 72.3<br>(71.7-72.8) | 73.6<br>(72.8-74.4) | 74.7<br>(73.1-76.4) |
| Bosnia and Herzegovina                           | 60.5<br>(62.0-66.6) | 65.1<br>(62.3-67.9) | 66.6<br>(64.2-68.9) | 67.9<br>(66.2-69.7) | 69.0<br>(67.5-70.6) | 64.8<br>(63.0-66.5) | 72.0<br>(70.7-73.5) | 74.5<br>(71.7-74.5) | 74.2<br>(72.7-75.8) | 74.9<br>(73.0-76.9) |
| Bulgaria                                         | 68.8<br>(68.5-69.3) | 68.8<br>(68.4-69.3) | 68.2<br>(68.2-69.0) | 68.2<br>(67.8-68.7) | 68.2<br>(67.8-68.6) | 68.2<br>(66.8-67.8) | 68.2<br>(67.9-68.9) | 68.2<br>(68.6-69.6) | 68.2<br>(69.9-70.9) | 68.2<br>(69.6-73.9) |
| Croatia                                          | 64.4<br>(60.8-67.8) | 65.7<br>(62.6-68.7) | 67.2<br>(64.0-69.4) | 67.2<br>(65.8-68.6) | 68.3<br>(67.3-69.5) | 68.3<br>(67.1-69.6) | 70.2<br>(69.3-71.1) | 71.2<br>(70.6-72.5) | 74.2<br>(72.0-73.8) | 75.2<br>(72.6-76.0) |
| Czech Republic                                   | 66.1<br>(65.8-66.5) | 66.9<br>(66.6-67.2) | 67.1<br>(66.8-67.4) | 67.5<br>(67.2-67.8) | 68.1<br>(67.8-68.4) | 69.8<br>(69.4-70.1) | 71.6<br>(71.3-72.0) | 73.0<br>(72.7-73.3) | 74.4<br>(74.1-74.7) | 76.2<br>(75.5-76.9) |
| Hungary                                          | 66.4<br>(65.7-66.9) | 66.4<br>(65.7-67.1) | 65.8<br>(65.1-66.5) | 65.8<br>(64.3-65.9) | 65.1<br>(64.5-66.1) | 65.3<br>(64.8-66.4) | 68.9<br>(66.8-68.3) | 67.5<br>(68.1-69.7) | 70.7<br>(69.9-71.4) | 72.2<br>(70.7-73.9) |
| Macedonia                                        | 65.3<br>(62.1-67.8) | 66.6<br>(64.0-68.7) | 67.3<br>(65.7-68.8) | 68.0<br>(66.6-69.2) | 68.2<br>(67.5-69.1) | 68.8<br>(68.1-69.5) | 69.8<br>(69.1-70.5) | 70.5<br>(69.9-71.2) | 71.6<br>(70.9-72.3) | 72.4<br>(71.5-73.3) |
| Montenegro                                       | 70.0<br>(68.7-71.6) | 71.1<br>(69.1-72.4) | 71.2<br>(69.6-72.6) | 71.2<br>(69.8-72.6) | 72.2<br>(71.0-73.3) | 70.9<br>(70.0-71.8) | 70.8<br>(69.9-71.6) | 72.1<br>(71.3-72.8) | 74.4<br>(72.7-74.6) | 74.4<br>(73.1-75.5) |
| Poland                                           | 66.4<br>(66.0-66.9) | 67.1<br>(66.6-67.6) | 66.2<br>(65.7-66.7) | 66.6<br>(66.1-67.1) | 66.5<br>(66.0-67.1) | 67.5<br>(66.9-68.0) | 69.6<br>(69.0-70.1) | 71.0<br>(70.4-71.6) | 72.1<br>(71.7-72.6) | 74.1<br>(72.8-75.4) |
| Romania                                          | 66.2<br>(65.6-66.9) | 67.8<br>(67.2-68.4) | 67.0<br>(66.4-67.7) | 67.0<br>(66.2-67.5) | 67.6<br>(65.9-67.3) | 65.5<br>(64.7-66.2) | 67.6<br>(66.9-68.4) | 69.8<br>(68.1-69.5) | 69.8<br>(69.1-70.5) | 71.7<br>(70.2-73.1) |
| Serbia                                           | 68.7<br>(66.0-69.5) | 68.7<br>(66.8-70.2) | 69.0<br>(67.1-70.6) | 69.0<br>(67.4-70.7) | 69.6<br>(68.5-70.9) | 67.5<br>(66.7-68.4) | 69.4<br>(68.6-70.3) | 71.9<br>(69.8-71.4) | 73.0<br>(71.3-72.6) | 73.0<br>(72.2-73.4) |
| Slovakia                                         | 66.7<br>(66.0-67.3) | 66.8<br>(66.2-67.5) | 66.8<br>(66.1-67.4) | 66.8<br>(66.3-67.5) | 66.7<br>(66.1-67.4) | 67.5<br>(67.8-69.0) | 68.3<br>(68.6-69.7) | 70.3<br>(69.6-70.8) | 71.8<br>(71.1-72.4) | 73.4<br>(71.9-75.0) |
| Slovenia                                         | 64.0<br>(59.9-68.3) | 65.2<br>(61.7-68.7) | 66.3<br>(64.2-68.7) | 67.6<br>(66.3-68.9) | 69.5<br>(68.5-70.8) | 72.1<br>(69.5-71.7) | 73.9<br>(71.1-73.2) | 75.9<br>(72.8-75.1) | 77.8<br>(75.2-77.2) | 78.8<br>(76.2-79.5) |
| Central Asia                                     | 58.7<br>(56.6-60.7) | 60.5<br>(58.7-62.1) | 61.8<br>(60.7-62.9) | 63.1<br>(62.4-63.8) | 63.4<br>(62.8-64.0) | 61.3<br>(60.6-62.0) | 62.2<br>(61.6-62.9) | 62.2<br>(62.0-63.6) | 65.2<br>(64.5-66.0) | 65.2<br>(66.4-68.7) |
| Armenia                                          | 62.4<br>(58.5-66.2) | 64.7<br>(61.7-67.9) | 66.4<br>(64.6-68.2) | 67.8<br>(66.7-68.9) | 68.0<br>(65.9-67.8) | 67.8<br>(64.0-66.0) | 68.4<br>(67.4-69.3) | 69.0<br>(68.1-70.1) | 70.2<br>(69.3-71.2) | 72.0<br>(70.5-73.5) |
| Azerbaijan                                       | 57.9<br>(54.0-61.7) | 60.9<br>(57.4-64.1) | 61.8<br>(59.6-64.1) | 62.4<br>(60.9-64.0) | 62.3<br>(60.8-63.7) | 60.9<br>(59.2-62.3) | 63.3<br>(61.9-64.6) | 64.5<br>(63.0-66.1) | 66.4<br>(64.5-67.7) | 68.1<br>(65.7-71.2) |
| Georgia                                          | 60.1<br>(56.1-64.0) | 62.6<br>(58.9-66.6) | 64.7<br>(62.4-66.9) | 65.8<br>(64.5-67.2) | 65.4<br>(64.1-66.8) | 64.7<br>(65.0-67.8) | 67.8<br>(66.5-69.1) | 67.7<br>(66.6-69.0) | 68.0<br>(66.7-69.2) | 69.1<br>(66.2-72.2) |
| Kazakhstan                                       | 59.5<br>(54.8-64.2) | 60.6<br>(56.1-65.0) | 61.3<br>(58.7-64.2) | 62.8<br>(60.9-64.8) | 63.0<br>(61.4-64.8) | 59.1<br>(57.5-60.9) | 59.2<br>(57.3-60.7) | 59.2<br>(57.4-61.1) | 63.4<br>(61.7-65.0) | 67.1<br>(64.1-70.0) |
| Kyrgyzstan                                       | 53.4<br>(52.7-59.0) | 55.9<br>(55.0-60.8) | 59.5<br>(58.0-61.2) | 61.4<br>(60.6-62.2) | 61.8<br>(61.1-62.7) | 61.8<br>(59.0-60.5) | 62.2<br>(61.8-62.9) | 62.6<br>(61.8-63.4) | 67.5<br>(63.5-65.0) | 67.5<br>(66.1-69.0) |
| Mongolia                                         | 53.4<br>(50.9-55.8) | 56.4<br>(54.1-58.6) | 58.7<br>(54.9-58.8) | 58.7<br>(56.9-60.4) | 59.8<br>(58.2-61.2) | 58.9<br>(57.6-60.3) | 59.9<br>(58.8-61.3) | 59.8<br>(58.5-61.3) | 62.0<br>(60.5-63.7) | 63.6<br>(61.4-65.6) |
| Tajikistan                                       | 55.3<br>(51.2-58.9) | 57.3<br>(54.5-60.2) | 60.4<br>(58.3-62.7) | 61.5<br>(59.4-63.6) | 62.4<br>(60.7-64.2) | 61.2<br>(59.4-63.1) | 63.0<br>(61.3-64.7) | 65.0<br>(63.5-66.7) | 67.0<br>(65.3-68.7) | 69.4<br>(67.1-71.5) |
| Turkmenistan                                     | 52.5<br>(47.5-56.7) | 55.2<br>(51.5-58.4) | 57.7<br>(55.5-59.6) | 59.6<br>(58.2-60.9) | 60.3<br>(59.0-61.6) | 59.5<br>(58.1-60.6) | 59.7<br>(58.1-61.0) | 61.2<br>(59.8-62.7) | 64.2<br>(62.7-65.4) | 66.5<br>(65.1-67.8) |
| Uzbekistan                                       | 60.7<br>(57.9-63.4) | 62.4<br>(60.2-64.4) | 63.2<br>(61.5-64.8) | 64.7<br>(63.5-65.9) | 65.3<br>(64.2-66.3) | 63.2<br>(62.1-64.3) | 63.4<br>(62.3-64.5) | 63.7<br>(62.2-65.0) | 65.7<br>(64.5-66.8) | 67.1<br>(65.3-68.8) |
| Latin America and Caribbean                      | 58.6<br>(57.7-59.5) | 61.4<br>(60.9-61.9) | 63.3<br>(62.9-63.7) | 64.6<br>(64.2-64.9) | 66.4<br>(66.1-66.7) | 67.6<br>(67.3-67.9) | 69.3<br>(69.0-69.5) | 70.6<br>(70.4-70.9) | 71.8<br>(71.8-71.3) | 72.8<br>(72.2-73.2) |
| Central Latin America                            | 60.5<br>(60.1-61.0) | 62.4<br>(62.0-62.9) | 64.2<br>(63.8-64.6) | 65.5<br>(65.1-65.9) | 68.1<br>(67.8-68.4) | 69.2<br>(68.8-69.5) | 70.8<br>(70.4-71.1) | 71.9<br>(71.6-72.2) | 72.4<br>(72.1-72.8) | 73.6<br>(72.9-74.2) |
| Colombia                                         | 63.9<br>(63.2-64.5) | 64.2<br>(63.5-64.8) | 66.5<br>(65.8-67.2) | 64.5<br>(63.5-65.6) | 67.6<br>(67.0-68.2) | 68.2<br>(67.6-68.7) | 69.4<br>(68.9-69.9) | 71.8<br>(71.3-72.4) | 73.5<br>(73.0-74.0) | 75.4<br>(74.2-76.7) |
| Costa Rica                                       | 67.6<br>(66.9-68.1) | 70.1<br>(69.4-70.7) | 72.5<br>(72.0-73.1) | 73.8<br>(73.3-74.3) | 74.2<br>(73.7-74.8) | 74.5<br>(74.0-75.0) | 75.5<br>(74.9-76.0) | 76.8<br>(76.2-77.4) | 77.9<br>(77.3-78.4) | 78.5<br>(77.4-79.6) |
| El Salvador                                      | 56.2<br>(54.7-57.7) | 58.6<br>(57.5-59.9) | 61.4<br>(60.1-62.8) | 60.1<br>(58.6-61.5) | 63.9<br>(63.0-64.9) | 66.2<br>(65.3-67.1) | 67.9<br>(66.9-68.9) | 69.0<br>(68.1-69.9) | 70.0<br>(69.0-71.0) | 71.5<br>(69.3-73.4) |
| Guatemala                                        | 49.6<br>(47.4-51.9) | 54.3<br>(52.1-56.4) | 56.5<br>(54.1-59.0) | 60.3<br>(58.1-62.4) | 62.8<br>(61.0-65.1) | 63.7<br>(61.3-66.0) | 65.3<br>(62.6-68.0) | 66.2<br>(63.3-68.8) | 67.9<br>(65.3-70.8) | 69.4<br>(65.4-73.9) |
| Honduras                                         | 56.4<br>(54.9-58.3) | 59.9<br>(58.2-61.8) | 63.7<br>(61.4-66.1) | 65.8<br>(63.3-68.5) | 67.4<br>(63.8-70.2) | 68.2<br>(64.2-71.6) | 68.9<br>(65.2-72.9) | 69.7<br>(65.6-74.0) | 70.6<br>(66.4-74.8) | 71.6<br>(67.3-78.8) |
| Mexico                                           | 59.9<br>(59.1-60.6) | 61.9<br>(61.2-62.5) | 63.1<br>(62.5-63.6) | 65.7<br>(65.2-66.2) | 68.3<br>(67.9-68.7) | 69.8<br>(69.5-70.2) | 71.8<br>(71.4-72.1) | 72.6<br>(72.2-72.9) | 72.6<br>(72.2-72.9) | 73.7<br>(73.2-74.2) |
| Nicaragua                                        | 56.0<br>(54.7-57.4) | 61.5<br>(60.6-62.4) | 65.1<br>(63.7-66.8) | 60.7<br>(57.1-64.5) | 70.7<br>(70.0-71.4) | 70.8<br>(70.0-71.6) | 72.8<br>(72.2-73.5) | 73.8<br>(73.1-74.4) | 74.7<br>(74.1-75.3) | 75.2<br>(72.9-77.7) |
| Panama                                           | 67.2<br>(66.2-68.4) | 69.8<br>(68.7-70.8) | 71.5<br>(70.5-72.5) | 72.2<br>(71.2-73.1) | 72.5<br>(71.4-73.6) | 72.5<br>(71.4-73.5) | 74.1<br>(73.1-75.2) | 74.8<br>(73.8-75.9) | 74.8<br>(73.6-75.9) | 76.0<br>(74.0-78.1) |
| Venezuela                                        | 65.3<br>(64.3-66.3) | 65.9<br>(65.0-66.8) | 67.4<br>(66.4-68.4) | 69.4<br>(68.3-70.5) | 70.0<br>(68.9-70.9) | 69.9<br>(68.7-71.1) | 70.7<br>(69.7-71.7) | 71.4<br>(70.2-72.4) | 71.3<br>(70.1-72.5) | 71.3<br>(68.2-73.8) |
| Andean Latin America                             | 49.0<br>(43.8-54.6) | 59.6<br>(58.8-60.5) | 62.0<br>(61.2-62.9) | 63.9<br>(63.2-64.7) | 66.5<br>(65.7-67.1) | 68.5<br>(67.8-69.2) | 71.1<br>(70.5-71.7) | 73.2<br>(72.5-73.8) | 74.3<br>(73.5-75.1) | 76.0<br>(74.6-77.5) |
| Bolivia                                          | 48.7<br>(47.0-50.4) | 51.9<br>(50.6-53.4) | 55.9<br>(53.7-56.4) | 57.6<br>(56.2-59.2) | 60.5<br>(59.2-61.8) | 60.5<br>(62.4-64.8) | 66.2<br>(65.3-67.2) | 68.7<br>(67.4-70.1) | 70.5<br>(68.6-72.9) | 72.2<br>(69.7-75.0) |
| Ecuador                                          | 61.7<br>(60.8-62.5) | 63.7<br>(62.9-64.4) | 66.0<br>(65.2-66.7) | 67.7<br>(67.0-68.4) | 69.0<br>(68.3-69.6) | 70.3<br>(69.6-71.0) | 71.6<br>(70.9-72.3) | 72.6<br>(72.1-73.5) | 74.1<br>(73.4-74.8) | 75.4<br>(74.1-76.5) |
| Peru                                             | 44.6<br>(36.9-53.9) | 60.9<br>(59.4-62.3) | 64.4<br>(61.6-64.0) | 64.4<br>(63.3-65.6) | 64.4<br>(66.3-68.5) | 64.4<br>(68.3-70.6) | 64.4<br>(68.3-70.6) | 64.4<br>(71.7-73.8) | 64.4<br>(74.0-76.1) | 64.4<br>(75.3-80.3) |
| Caribbean                                        | 61.5<br>(60.6-62.4) | 62.9<br>(62.1-63.8) | 63.9<br>(63.0-64.7) | 65.1<br>(64.3-65.7) | 65.3<br>(65.3-66.6) | 65.3<br>(65.3-66.6) | 67.7<br>(67.1-68.4) | 68.5<br>(67.7-69.3) | 68.5<br>(44.3-66.8) | 71.0<br>(69.7-72.3) |
| Antigua and Barbuda                              | 64.9<br>(63.4-66.2) | 65.8<br>(64.5-67.2) | 67.3<br>(66.4-69.3) | 67.7<br>(68.7-71.2) | 69.8<br>(69.        |                     |                     |                     |                     |                     |

Appendix Table 13B. Estimates of life expectancy at birth by location, males, 1970, 1975, 1980, 1985, 1990, 1995, 2000, 2005, 2010, 2016

| Location                               | 1970                | 1975                | 1980                | 1985                | 1990                | 1995                | 2000                | 2005                | 2010                | 2016                |
|----------------------------------------|---------------------|---------------------|---------------------|---------------------|---------------------|---------------------|---------------------|---------------------|---------------------|---------------------|
| Barbados                               | 67.2<br>(65.5-68.7) | 68.8<br>(67.3-70.0) | 70.4<br>(69.1-71.5) | 70.7<br>(69.5-71.7) | 70.9<br>(69.7-72.0) | 71.0<br>(69.8-72.2) | 72.2<br>(71.0-73.5) | 73.5<br>(72.4-74.5) | 74.2<br>(73.2-75.2) | 74.4<br>(72.8-75.9) |
| Belize                                 | 64.7<br>(62.7-66.7) | 66.2<br>(64.8-67.5) | 67.5<br>(66.1-68.8) | 69.0<br>(67.8-70.2) | 69.4<br>(67.8-70.5) | 67.5<br>(66.2-68.9) | 65.6<br>(64.4-66.7) | 67.0<br>(65.8-68.1) | 68.6<br>(67.4-69.7) | 69.1<br>(67.1-71.4) |
| Bermuda                                | 64.3<br>(63.2-65.3) | 65.2<br>(64.2-66.4) | 65.9<br>(64.8-67.2) | 66.1<br>(65.0-67.2) | 66.8<br>(65.7-67.9) | 68.8<br>(67.7-69.8) | 70.2<br>(69.2-71.2) | 73.0<br>(72.0-73.9) | 74.2<br>(73.3-75.3) | 75.7<br>(74.1-77.2) |
| Cuba                                   | 70.4<br>(69.8-70.9) | 71.7<br>(71.2-72.3) | 72.2<br>(71.6-72.7) | 72.4<br>(71.8-73.0) | 72.7<br>(72.1-73.3) | 73.0<br>(72.4-73.6) | 74.4<br>(73.8-75.0) | 75.5<br>(74.9-76.1) | 76.3<br>(75.7-76.9) | 76.7<br>(75.7-77.7) |
| Dominica                               | 66.9<br>(65.5-68.2) | 69.6<br>(68.4-70.7) | 72.3<br>(71.2-73.3) | 72.1<br>(71.0-73.2) | 70.4<br>(69.5-71.5) | 69.6<br>(68.5-70.7) | 70.5<br>(69.5-71.7) | 70.8<br>(69.7-71.9) | 70.3<br>(69.1-71.5) | 70.2<br>(67.9-72.4) |
| Dominican Republic                     | 63.5<br>(62.4-64.7) | 65.6<br>(64.3-66.8) | 67.5<br>(66.4-68.6) | 68.3<br>(67.4-69.4) | 68.9<br>(67.9-70.0) | 69.8<br>(68.8-70.7) | 70.4<br>(69.4-71.7) | 70.5<br>(69.3-72.1) | 71.6<br>(70.5-73.4) | 72.9<br>(71.2-74.9) |
| Grenada                                | 65.3<br>(62.5-67.9) | 66.8<br>(64.4-69.3) | 67.7<br>(64.9-70.2) | 67.7<br>(65.2-70.1) | 68.7<br>(66.9-70.4) | 68.9<br>(67.4-70.3) | 68.3<br>(67.0-69.9) | 68.2<br>(66.9-69.6) | 68.6<br>(67.2-70.1) | 68.8<br>(66.7-71.1) |
| Guyana                                 | 58.4<br>(57.1-59.6) | 59.3<br>(57.9-60.5) | 60.4<br>(59.1-61.7) | 61.1<br>(59.9-62.4) | 60.9<br>(59.8-62.1) | 62.0<br>(60.9-63.1) | 62.3<br>(61.1-63.5) | 61.4<br>(60.4-62.6) | 62.5<br>(61.3-63.8) | 64.7<br>(63.0-66.4) |
| Haiti                                  | 44.1<br>(41.1-47.0) | 47.1<br>(44.5-49.9) | 49.5<br>(47.0-52.1) | 51.9<br>(49.8-54.1) | 53.9<br>(52.9-55.8) | 54.8<br>(52.9-56.6) | 56.6<br>(54.6-58.7) | 58.2<br>(55.8-60.7) | 28.1<br>(18.4-51.9) | 63.6<br>(60.2-66.9) |
| Jamaica                                | 66.7<br>(65.4-67.9) | 68.9<br>(67.5-70.4) | 70.0<br>(68.7-71.4) | 71.4<br>(70.3-72.5) | 73.4<br>(72.1-74.7) | 73.0<br>(71.4-74.5) | 72.3<br>(70.8-73.6) | 73.3<br>(71.9-74.7) | 72.9<br>(71.4-74.3) | 73.1<br>(70.4-75.5) |
| Puerto Rico                            | 68.7<br>(68.0-69.5) | 69.0<br>(68.3-69.8) | 70.4<br>(69.6-71.2) | 70.4<br>(69.5-71.2) | 69.7<br>(68.8-70.5) | 69.1<br>(68.2-69.9) | 72.0<br>(71.3-72.9) | 73.2<br>(72.4-74.0) | 74.1<br>(73.3-74.9) | 75.0<br>(73.8-76.4) |
| Saint Lucia                            | 63.7<br>(60.6-65.9) | 65.0<br>(63.2-66.4) | 66.8<br>(65.4-68.0) | 68.1<br>(66.8-69.2) | 69.5<br>(68.3-70.6) | 70.6<br>(69.6-71.6) | 71.6<br>(70.6-72.5) | 71.1<br>(70.0-72.0) | 72.2<br>(71.2-73.2) | 73.0<br>(71.6-74.3) |
| Saint Vincent and the Grenadines       | 62.6<br>(60.1-65.0) | 64.4<br>(62.2-66.2) | 67.0<br>(65.2-68.4) | 68.5<br>(67.0-70.1) | 68.5<br>(67.3-69.9) | 68.4<br>(67.3-69.5) | 67.7<br>(66.6-68.6) | 68.6<br>(67.7-69.5) | 68.9<br>(68.0-69.8) | 68.8<br>(67.4-70.0) |
| Suriname                               | 62.8<br>(61.6-63.9) | 62.7<br>(61.7-63.6) | 63.6<br>(62.8-64.4) | 66.5<br>(65.8-67.2) | 67.7<br>(67.0-68.4) | 67.9<br>(67.1-68.5) | 67.2<br>(66.4-67.9) | 66.6<br>(65.9-67.3) | 67.2<br>(66.4-68.0) | 68.4<br>(67.1-69.7) |
| Trinidad and Tobago                    | 63.5<br>(62.9-64.2) | 64.3<br>(63.6-65.0) | 65.6<br>(64.9-66.4) | 66.3<br>(65.6-67.0) | 66.3<br>(65.6-67.0) | 66.3<br>(65.5-67.1) | 66.4<br>(65.6-67.1) | 67.9<br>(67.2-68.7) | 68.8<br>(67.9-69.7) | 69.3<br>(67.8-70.8) |
| Virgin Islands, U.S.                   | 64.0<br>(63.8-65.3) | 65.3<br>(63.8-66.7) | 66.6<br>(65.4-67.9) | 68.7<br>(67.7-70.1) | 69.2<br>(68.0-70.5) | 69.0<br>(67.7-70.1) | 69.6<br>(68.5-70.4) | 70.0<br>(68.9-71.0) | 70.0<br>(68.5-71.3) | 70.6<br>(68.8-72.9) |
| Tropical Latin America                 | 58.3<br>(56.9-59.6) | 60.4<br>(59.3-61.3) | 62.5<br>(61.7-63.2) | 63.5<br>(62.9-64.1) | 64.8<br>(64.3-65.4) | 66.0<br>(65.6-66.5) | 67.7<br>(67.2-68.2) | 69.3<br>(68.8-69.3) | 70.5<br>(70.0-71.0) | 71.6<br>(71.0-72.1) |
| Brazil                                 | 60.3<br>(56.8-59.6) | 62.3<br>(59.2-61.3) | 63.4<br>(61.5-63.1) | 64.4<br>(62.8-64.0) | 64.4<br>(64.1-65.2) | 65.8<br>(65.3-66.3) | 67.2<br>(67.1-68.1) | 68.2<br>(68.7-69.7) | 69.2<br>(69.9-70.9) | 70.5<br>(70.9-72.1) |
| Paraguay                               | 68.2<br>(67.3-69.1) | 68.9<br>(68.0-69.8) | 70.6<br>(69.7-71.4) | 71.7<br>(71.0-72.5) | 72.9<br>(72.2-73.6) | 72.6<br>(71.9-73.3) | 72.3<br>(71.6-72.9) | 72.1<br>(71.4-72.7) | 72.1<br>(70.8-72.7) | 72.1<br>(70.3-73.5) |
| Southeast Asia, East Asia, and Oceania | 58.3<br>(57.4-59.1) | 60.2<br>(59.4-61.0) | 62.9<br>(61.4-62.4) | 64.5<br>(63.1-64.0) | 65.2<br>(64.0-64.9) | 66.1<br>(65.1-65.8) | 67.5<br>(66.4-67.1) | 69.7<br>(68.4-69.0) | 71.7<br>(70.2-70.7) | 73.4<br>(71.8-74.2) |
| East Asia                              | 59.9<br>(59.1-61.0) | 62.0<br>(61.4-63.0) | 62.7<br>(62.3-63.6) | 64.3<br>(63.9-65.1) | 65.0<br>(64.6-65.7) | 66.2<br>(65.6-66.6) | 67.6<br>(67.1-67.8) | 69.7<br>(69.4-70.0) | 71.7<br>(71.4-71.9) | 73.4<br>(73.0-73.6) |
| China                                  | 65.5<br>(58.9-60.8) | 67.7<br>(61.2-62.8) | 68.6<br>(62.0-63.4) | 68.9<br>(63.7-64.9) | 69.2<br>(64.4-65.5) | 69.2<br>(65.7-66.6) | 69.9<br>(67.2-68.0) | 70.9<br>(69.4-70.0) | 67.1<br>(71.4-72.0) | 67.9<br>(73.0-73.7) |
| North Korea                            | 66.6<br>(63.9-67.0) | 68.6<br>(66.2-69.1) | 69.4<br>(67.1-70.3) | 70.8<br>(67.3-70.7) | 71.5<br>(67.6-71.1) | 72.4<br>(54.9-67.8) | 73.4<br>(55.2-66.7) | 74.6<br>(66.0-68.3) | 76.1<br>(66.2-68.5) | 76.7<br>(66.7-69.1) |
| Taiwan (Province of China)             | 53.4<br>(66.0-67.3) | 55.1<br>(67.9-69.2) | 59.5<br>(68.7-70.0) | 61.5<br>(70.1-71.3) | 63.1<br>(70.9-72.1) | 64.4<br>(71.4-72.7) | 65.5<br>(72.8-74.1) | 66.9<br>(73.9-75.3) | 68.3<br>(75.4-76.7) | 70.0<br>(75.0-78.5) |
| Southeast Asia                         | 40.0<br>(51.9-54.7) | 49.9<br>(53.0-57.0) | 51.6<br>(58.9-60.0) | 55.2<br>(61.1-62.0) | 56.2<br>(62.7-63.6) | 57.1<br>(63.9-64.8) | 63.2<br>(65.1-66.0) | 65.2<br>(66.3-67.4) | 68.2<br>(67.8-68.8) | 72.1<br>(69.3-70.6) |
| Cambodia                               | 52.9<br>(37.3-42.9) | 55.5<br>(12.9-40.6) | 58.4<br>(47.4-52.5) | 60.8<br>(49.3-53.8) | 62.4<br>(54.3-56.7) | 64.5<br>(55.1-57.3) | 66.1<br>(55.6-58.2) | 67.2<br>(59.0-61.4) | 68.2<br>(62.0-64.5) | 69.5<br>(64.5-67.0) |
| Indonesia                              | 40.1<br>(51.8-53.9) | 44.1<br>(54.6-56.5) | 46.3<br>(57.6-59.2) | 49.1<br>(60.1-61.5) | 50.7<br>(61.8-62.9) | 52.7<br>(64.0-64.9) | 55.1<br>(65.6-66.6) | 58.2<br>(66.6-67.7) | 61.5<br>(67.5-68.9) | 64.8<br>(68.8-70.7) |
| Laos                                   | 62.7<br>(33.8-45.4) | 64.8<br>(39.4-48.6) | 66.8<br>(43.1-49.4) | 68.4<br>(47.2-51.0) | 69.6<br>(49.2-52.2) | 70.2<br>(51.3-54.1) | 71.0<br>(53.7-56.4) | 72.5<br>(56.9-59.4) | 72.5<br>(60.3-62.7) | 73.2<br>(62.9-66.4) |
| Malaysia                               | 38.8<br>(62.3-63.2) | 44.3<br>(64.3-65.3) | 48.7<br>(66.3-67.3) | 56.1<br>(68.0-68.8) | 62.8<br>(69.3-69.9) | 67.6<br>(69.9-70.5) | 71.6<br>(70.6-71.3) | 74.7<br>(71.7-72.3) | 76.3<br>(72.1-72.8) | 77.6<br>(72.4-73.9) |
| Maldives                               | 58.1<br>(35.4-42.5) | 58.9<br>(40.9-47.6) | 62.0<br>(46.3-51.5) | 63.9<br>(55.0-57.3) | 64.4<br>(61.7-64.0) | 65.4<br>(66.0-69.1) | 66.4<br>(70.5-72.5) | 68.1<br>(73.8-75.7) | 69.9<br>(75.3-77.3) | 71.4<br>(75.0-80.3) |
| Mauritius                              | 45.6<br>(57.6-58.6) | 49.8<br>(58.4-59.4) | 52.9<br>(61.4-62.5) | 54.9<br>(63.4-64.4) | 56.3<br>(64.9-65.9) | 57.1<br>(65.9-67.0) | 60.6<br>(67.6-68.7) | 63.7<br>(68.5-69.7) | 66.7<br>(69.3-70.5) | 67.9<br>(69.6-73.4) |
| Myanmar                                | 59.7<br>(42.8-48.3) | 60.6<br>(47.4-52.2) | 61.3<br>(50.9-55.0) | 63.5<br>(53.1-56.8) | 63.5<br>(54.5-58.0) | 64.3<br>(55.2-58.7) | 64.5<br>(56.0-60.2) | 65.5<br>(57.8-62.5) | 66.6<br>(61.0-65.3) | 66.6<br>(65.2-69.9) |
| Philippines                            | 58.8<br>(58.8-60.8) | 62.8<br>(59.6-61.5) | 66.2<br>(60.3-62.2) | 67.2<br>(61.0-62.7) | 67.8<br>(62.6-64.4) | 68.3<br>(63.5-65.2) | 68.6<br>(63.5-65.2) | 69.1<br>(63.7-65.4) | 70.5<br>(64.6-66.4) | 73.7<br>(64.6-68.7) |
| Sri Lanka                              | 62.8<br>(62.4-64.1) | 64.8<br>(61.9-63.7) | 66.7<br>(65.7-67.5) | 68.6<br>(66.1-68.3) | 69.6<br>(66.7-68.9) | 70.2<br>(66.7-68.9) | 71.0<br>(67.0-69.7) | 72.5<br>(68.8-71.4) | 73.7<br>(68.9-72.2) | 75.7<br>(70.5-76.9) |
| Seychelles                             | 62.8<br>(61.4-63.9) | 64.8<br>(63.6-65.9) | 66.7<br>(65.7-67.7) | 68.6<br>(65.5-67.6) | 69.6<br>(63.4-65.6) | 70.5<br>(63.7-65.9) | 71.4<br>(65.7-67.6) | 72.5<br>(67.3-69.1) | 73.6<br>(68.7-70.6) | 75.0<br>(70.2-72.0) |
| Thailand                               | 59.9<br>(59.1-60.8) | 62.1<br>(61.2-63.0) | 63.0<br>(62.2-63.8) | 65.6<br>(64.8-66.4) | 67.2<br>(66.4-68.0) | 68.9<br>(65.9-67.8) | 70.9<br>(67.2-69.3) | 73.9<br>(70.2-71.7) | 76.9<br>(72.8-74.3) | 79.6<br>(72.9-76.2) |
| Timor-Leste                            | 44.6<br>(40.0-49.5) | 42.0<br>(38.0-46.2) | 46.5<br>(43.1-50.2) | 55.0<br>(52.5-57.4) | 58.4<br>(56.1-60.8) | 60.8<br>(58.8-63.0) | 63.6<br>(61.7-65.6) | 66.6<br>(64.6-68.8) | 70.3<br>(67.7-72.8) | 71.7<br>(68.7-74.7) |
| Vietnam                                | 49.1<br>(41.7-57.1) | 58.2<br>(55.4-60.9) | 61.9<br>(59.7-63.6) | 63.8<br>(61.9-65.5) | 65.3<br>(63.2-67.1) | 66.3<br>(64.3-68.3) | 67.3<br>(65.7-69.5) | 68.3<br>(66.5-70.6) | 69.5<br>(67.5-71.7) | 70.9<br>(69.1-72.7) |
| Oceania                                | 54.7<br>(52.7-56.6) | 55.3<br>(53.6-57.1) | 55.9<br>(54.2-57.5) | 56.3<br>(54.6-57.9) | 56.8<br>(55.1-58.5) | 57.6<br>(55.7-59.4) | 58.2<br>(56.1-60.1) | 58.3<br>(56.0-60.4) | 59.1<br>(56.5-61.3) | 60.7<br>(58.2-62.9) |
| American Samoa                         | 64.2<br>(62.4-66.0) | 65.7<br>(63.6-67.6) | 66.7<br>(64.7-68.5) | 67.5<br>(65.8-69.2) | 66.9<br>(65.4-68.5) | 67.8<br>(65.7-69.7) | 69.0<br>(67.5-70.5) | 69.0<br>(67.5-70.5) | 70.1<br>(68.4-71.6) | 70.4<br>(67.8-72.7) |
| Federated States of Micronesia         | 57.9<br>(55.3-61.1) | 58.5<br>(56.1-61.4) | 59.4<br>(57.3-61.9) | 60.2<br>(58.0-62.5) | 61.0<br>(58.8-63.2) | 62.1<br>(59.9-64.3) | 62.7<br>(60.5-64.9) | 64.0<br>(61.9-66.2) | 63.5<br>(60.4-66.0) | 63.6<br>(60.7-66.3) |
| Fiji                                   | 61.9<br>(59.5-64.4) | 61.4<br>(59.5-63.8) | 62.0<br>(60.0-64.2) | 62.4<br>(60.3-64.4) | 62.7<br>(60.2-66.2) | 62.1<br>(59.0-65.0) | 61.8<br>(59.6-63.8) | 62.6<br>(60.6-64.9) | 63.2<br>(61.0-65.8) | 63.3<br>(59.2-68.0) |
| Guam                                   | 64.9<br>(63.5-66.4) | 65.5<br>(63.8-67.0) | 68.1<br>(66.4-69.7) | 69.9<br>(68.1-71.4) | 70.3<br>(68.9-71.6) | 70.7<br>(69.5-72.3) | 71.1<br>(69.1-71.5) | 70.4<br>(69.1-71.5) | 69.0<br>(67.5-70.5) | 69.0<br>(66.9-71.3) |
| Kiribati                               | 52.4<br>(49.2-55.7) | 55.1<br>(51.7-58.5) | 56.1<br>(51.9-59.4) | 55.4<br>(52.2-58.3) | 55.5<br>(53.8-57.4) | 55.5<br>(54.0-56.9) | 55.9<br>(54.5-57.3) | 56.6<br>(54.6-58.4) | 57.1<br>(54.7-59.6) | 58.2<br>(55.4-61.1) |
| Marshall Islands                       | 57.1<br>(53.0-61.1) | 58.9<br>(54.9-62.6) | 60.3<br>(57.3-63.5) | 60.8<br>(58.6-62.8) | 61.5<br>(59.9-62.8) | 61.9<br>(60.5-63.1) | 61.0<br>(59.0-63.0) | 61.1<br>(59.3-63.0) | 61.6<br>(59.4-63.9) | 62.7<br>(60.1-65.4) |
| Northern Mariana Islands               | 68.1<br>(65.1-71.5) | 69.6<br>(66.8-72.5) | 70.7<br>(68.0-73.6) | 71.5<br>(68.8-74.2) | 72.7<br>(70.2-75.4) | 74.1<br>(71.8-76.3) | 75.0<br>(73.0-77.0) | 74.8<br>(72.8-76.8) | 74.4<br>(72.3-76.5) | 73.9<br>(71.5-76.2) |
| Papua New Guinea                       | 52.4<br>(50.0-55.0) | 53.3<br>(51.1-55.8) | 53.5<br>(51.3-55.8) | 53.8<br>(51.7-56.0) | 54.5<br>(52.2-56.4) | 55.6<br>(53.2-58.1) | 56.4<br>(53.7-59.0) | 56.5<br>(53.6-59.2) | 57.5<br>(54.3-60.2) | 59.5<br>(56.5-62.3) |
| Samoa                                  | 62.6<br>(60.8-64.4) | 62.6<br>(60.9-64.3) | 64.3<br>(62.4-65.9) | 64.9<br>(62.7-66.6) | 65.8<br>(63.5-67.8) | 66.8<br>(64.5-68.8) | 67.8<br>(65.8-69.8) | 68.8<br>(66.8-70.7) | 69.4<br>(67.5-71.5) | 69.9<br>(67.9-72.2) |
| Solomon Islands                        | 52.9<br>(50.3-55.9) | 52.5<br>(49.8-55.2) | 57.0<br>(54.6-59.5) | 58.1<br>(55.8-60.4) | 58.6<br>(56.4-61.0) | 59.6<br>(57.4-61.8) | 60.2<br>(58.2-62.4) | 60.0<br>(57.8-62.3) | 60.6<br>(58.4-62.9) | 61.9<br>(59.3-64.3) |
| Tonga                                  | 63.5<br>(60.9-66.4) | 64.0<br>(61.2-66.9) | 64.0<br>(61.3-66.8) | 64.8<br>(62.2-67.5) | 65.7<br>(63.1-68.3) | 66.1<br>(63.7-68.4) | 66.4<br>(64.2-68.6) | 66.7<br>(64.5-68.9) | 67.0<br>(64.7-69.2) | 67.5<br>(65.2-70.1) |
| Vanuatu                                | 55.1<br>(51.9-57.9) | 56.7<br>(53.8-59.4) | 58.2<br>(55.9-60.5) | 59.2<br>(57.3-61.2) | 59.9<br>(57.9-61.9) | 60.4<br>(58.5-62.4) | 60.7<br>(58.7-62.5) | 60.7<br>(58.5-62.8) | 61.4<br>(58.9-63.7) | 62.2<br>(59.7-64.7) |
| North Africa and Middle East           | 52.9<br>(51.8-54.0) | 56.5<br>(55.7-57.3) | 58.9<br>(58.0-59.8) | 61.2<br>(60.2-62.4) | 65.0<br>(64.4-65.6) | 67.8<br>(65.7-66.7) | 69.0<br>(67.3-68.2) | 69.0<br>(68.3-69.6) | 70.4<br>(69.8-71.0) | 70.9<br>(70.1-71.7) |
| North Africa and Middle East           | 47.1<br>(43.0-50.7) | 47.6<br>(44.4-50.4) | 42.9<br>(38.2-47.9) | 39.5<br>(32.5-48.3) | 51.9<br>(50.1-53.9) | 51.0<br>(49.3-52.6) | 51.4<br>(49.7-53.4) | 53.6<br>(51.8-55.6) | 55.6<br>(53.7-57.5) | 56.9<br>(54.5-59.2) |
| Afghanistan                            | 55.9<br>(54.0-57.9) | 58.1<br>(56.4-59.8) | 60.9<br>(59.5-62.2) | 66.3<br>(65.3-67.4) | 69.4<br>(68.2-70.7) | 70.6<br>(69.3-72.0) | 72.4<br>(71.0-73.6) | 74.1<br>(72.9-75.3) | 75.4<br>(74.6-76.5) | 76.4<br>(75.1-77.7) |
| Algeria                                | 63.0<br>(60.0-65.8) | 65.9<br>(63.0-68.5) | 68.6<br>(65.9-69.9) | 68.6<br>(67.1-70.   |                     |                     |                     |                     |                     |                     |

Appendix Table 13B. Estimates of life expectancy at birth by location, males, 1970, 1975, 1980, 1985, 1990, 1995, 2000, 2005, 2010, 2016

| Location                    | 1970                | 1975                | 1980                | 1985                | 1990                | 1995                | 2000                | 2005                | 2010                | 2016                |
|-----------------------------|---------------------|---------------------|---------------------|---------------------|---------------------|---------------------|---------------------|---------------------|---------------------|---------------------|
| Egypt                       | 49.7<br>(48.3-50.9) | 52.5<br>(51.3-53.8) | 56.6<br>(55.4-58.0) | 59.0<br>(58.0-60.0) | 63.3<br>(62.4-64.3) | 65.4<br>(64.5-66.3) | 67.3<br>(66.5-68.2) | 67.7<br>(66.9-68.7) | 68.0<br>(67.1-68.9) | 69.4<br>(67.6-71.5) |
| Iran                        | 53.1<br>(50.3-56.8) | 62.1<br>(59.3-64.8) | 63.4<br>(60.7-66.1) | 65.1<br>(62.2-68.1) | 65.2<br>(62.6-68.1) | 68.2<br>(66.1-70.6) | 69.0<br>(67.0-70.9) | 70.2<br>(67.4-72.7) | 72.4<br>(69.6-74.9) | 73.8<br>(71.2-76.2) |
| Iraq                        | 58.0<br>(56.0-60.1) | 58.7<br>(57.0-60.3) | 58.2<br>(54.1-63.0) | 57.0<br>(51.3-63.7) | 64.7<br>(62.1-67.4) | 63.7<br>(61.2-65.9) | 64.2<br>(62.0-66.4) | 62.2<br>(59.5-65.4) | 65.1<br>(62.1-68.1) | 64.9<br>(61.4-69.1) |
| Jordan                      | 60.2<br>(57.5-62.8) | 62.4<br>(59.9-64.7) | 64.8<br>(62.2-66.9) | 68.3<br>(66.3-70.0) | 71.0<br>(69.2-72.6) | 71.9<br>(69.8-73.7) | 72.6<br>(69.7-74.9) | 72.8<br>(70.3-75.1) | 74.6<br>(71.7-77.3) | 74.7<br>(71.4-78.2) |
| Kuwait                      | 67.1<br>(65.2-69.0) | 67.7<br>(65.9-69.5) | 70.3<br>(68.6-72.1) | 72.9<br>(71.2-74.6) | 74.5<br>(72.2-76.9) | 75.7<br>(73.9-77.2) | 76.3<br>(74.9-78.0) | 76.9<br>(75.1-78.6) | 78.6<br>(76.9-80.3) | 80.0<br>(76.4-83.6) |
| Lebanon                     | 65.2<br>(61.9-68.5) | 55.0<br>(47.0-64.4) | 46.4<br>(36.4-61.7) | 60.0<br>(53.9-66.3) | 66.4<br>(64.6-68.8) | 72.8<br>(71.8-74.0) | 75.9<br>(74.3-77.3) | 77.8<br>(76.2-79.5) | 79.0<br>(77.7-80.3) | 78.8<br>(77.1-80.4) |
| Libya                       | 64.7<br>(63.0-66.4) | 67.6<br>(65.9-69.0) | 67.1<br>(68.2-71.1) | 70.9<br>(69.5-72.3) | 71.6<br>(70.3-73.0) | 72.8<br>(71.4-74.0) | 73.1<br>(71.9-74.3) | 73.7<br>(72.5-75.1) | 74.3<br>(72.7-75.9) | 72.6<br>(71.0-74.6) |
| Morocco                     | 53.0<br>(51.8-54.2) | 55.5<br>(54.5-56.7) | 59.0<br>(58.1-59.9) | 62.7<br>(61.9-63.6) | 65.7<br>(64.9-66.6) | 67.7<br>(66.8-68.5) | 69.4<br>(68.5-70.3) | 70.9<br>(69.9-71.8) | 72.2<br>(71.2-73.2) | 73.5<br>(72.5-74.5) |
| Palestine                   | 60.4<br>(56.1-64.9) | 66.3<br>(63.4-69.1) | 68.2<br>(67.8-70.9) | 69.9<br>(67.8-72.4) | 70.1<br>(68.3-72.0) | 71.2<br>(70.0-72.5) | 69.7<br>(69.0-70.5) | 69.6<br>(69.1-69.9) | 70.5<br>(70.1-70.9) | 70.2<br>(69.5-71.0) |
| Oman                        | 50.6<br>(48.1-53.2) | 55.8<br>(53.5-58.1) | 62.1<br>(60.1-64.1) | 66.7<br>(65.1-68.4) | 69.5<br>(68.1-70.8) | 71.8<br>(70.7-72.8) | 72.9<br>(71.5-74.2) | 73.9<br>(72.8-75.0) | 74.1<br>(73.0-75.1) | 75.3<br>(74.5-76.3) |
| Qatar                       | 64.8<br>(60.1-69.9) | 65.8<br>(61.4-70.5) | 67.2<br>(63.4-71.2) | 72.0<br>(69.0-74.2) | 74.8<br>(72.3-77.1) | 74.3<br>(71.9-76.7) | 74.3<br>(71.7-76.8) | 75.3<br>(73.0-78.2) | 78.2<br>(75.9-80.6) | 79.0<br>(75.4-82.6) |
| Saudi Arabia                | 62.1<br>(59.0-65.1) | 66.5<br>(63.9-68.7) | 69.3<br>(67.3-71.2) | 70.5<br>(68.8-72.2) | 70.6<br>(69.0-72.1) | 72.0<br>(70.7-73.3) | 72.6<br>(71.6-73.6) | 73.2<br>(72.4-73.9) | 74.2<br>(73.5-75.0) | 76.0<br>(75.0-77.0) |
| Sudan                       | 51.3<br>(49.7-52.7) | 52.6<br>(51.2-53.8) | 53.8<br>(52.4-55.1) | 49.2<br>(45.1-53.4) | 57.6<br>(56.5-58.7) | 59.4<br>(58.3-60.5) | 61.3<br>(60.3-62.3) | 63.4<br>(62.5-64.5) | 64.6<br>(63.5-65.7) | 66.4<br>(64.9-67.7) |
| Syria                       | 62.3<br>(61.1-63.5) | 64.6<br>(63.7-65.5) | 66.4<br>(65.4-67.4) | 68.1<br>(67.1-69.0) | 69.1<br>(68.1-70.1) | 70.5<br>(69.0-71.5) | 71.3<br>(70.4-72.4) | 73.0<br>(72.2-73.8) | 74.0<br>(73.1-75.0) | 63.2<br>(56.3-70.7) |
| Tunisia                     | 56.1<br>(54.8-57.4) | 60.5<br>(59.4-61.6) | 63.5<br>(62.4-64.8) | 67.7<br>(66.4-69.0) | 69.4<br>(68.2-70.6) | 70.4<br>(69.3-71.6) | 72.4<br>(71.1-73.9) | 73.5<br>(72.0-75.3) | 74.3<br>(71.8-76.4) | 74.6<br>(72.1-77.2) |
| Turkey                      | 53.2<br>(50.1-56.7) | 56.3<br>(54.0-58.7) | 60.3<br>(58.3-62.3) | 64.6<br>(62.8-66.2) | 66.8<br>(65.7-68.0) | 67.4<br>(66.4-68.4) | 70.6<br>(69.7-71.4) | 73.4<br>(72.5-74.2) | 75.0<br>(73.8-76.3) | 75.8<br>(73.7-78.1) |
| United Arab Emirates        | 64.5<br>(60.4-68.8) | 67.7<br>(65.5-71.7) | 70.0<br>(66.8-73.8) | 71.6<br>(68.1-75.0) | 71.7<br>(68.5-74.8) | 72.1<br>(69.6-74.7) | 71.7<br>(71.5-74.9) | 74.9<br>(73.8-76.0) | 74.6<br>(73.0-76.3) | 74.5<br>(72.1-76.8) |
| Yemen                       | 40.0<br>(37.8-41.9) | 47.2<br>(45.9-48.6) | 50.0<br>(50.9-53.4) | 56.0<br>(54.9-57.3) | 58.0<br>(57.4-59.8) | 58.5<br>(59.3-61.7) | 60.5<br>(61.5-63.8) | 60.6<br>(63.7-66.0) | 61.3<br>(65.9-68.5) | 61.8<br>(63.7-67.1) |
| South Asia                  | 48.5<br>(47.2-49.7) | 51.7<br>(50.9-52.5) | 54.4<br>(53.7-55.1) | 56.5<br>(55.9-57.0) | 58.5<br>(57.9-59.0) | 60.1<br>(59.5-60.6) | 61.5<br>(61.0-62.0) | 63.0<br>(62.5-63.6) | 64.8<br>(64.3-65.4) | 67.1<br>(66.5-67.7) |
| South Asia                  | 41.5<br>(47.2-49.7) | 52.1<br>(50.9-52.5) | 54.0<br>(53.7-55.1) | 55.0<br>(55.9-57.0) | 57.0<br>(57.9-59.0) | 60.0<br>(59.5-60.6) | 64.2<br>(61.0-62.0) | 66.4<br>(62.5-63.6) | 68.4<br>(64.3-65.4) | 70.5<br>(66.5-70.7) |
| Bangladesh                  | 49.2<br>(37.3-46.5) | 51.7<br>(50.4-54.0) | 54.0<br>(52.6-55.5) | 57.1<br>(53.8-56.2) | 60.7<br>(56.6-58.7) | 63.5<br>(59.6-62.2) | 65.3<br>(63.2-65.3) | 67.3<br>(65.5-67.3) | 70.5<br>(67.4-69.5) | 72.2<br>(68.8-72.0) |
| Bhutan                      | 48.5<br>(46.2-52.6) | 50.9<br>(48.8-54.8) | 54.0<br>(51.4-56.7) | 56.3<br>(54.7-59.6) | 58.3<br>(58.5-62.9) | 59.9<br>(61.6-65.4) | 62.9<br>(63.5-67.1) | 62.9<br>(67.0-70.4) | 66.9<br>(68.6-72.3) | 66.9<br>(70.1-74.4) |
| India                       | 48.6<br>(47.2-49.8) | 50.3<br>(49.9-51.8) | 52.3<br>(53.1-54.8) | 54.9<br>(55.6-57.0) | 57.7<br>(57.7-58.9) | 60.5<br>(59.3-60.5) | 62.8<br>(60.7-61.7) | 63.5<br>(62.3-63.5) | 67.4<br>(63.9-65.3) | 69.7<br>(66.2-67.6) |
| Nepal                       | 56.6<br>(47.4-49.7) | 58.4<br>(49.1-51.5) | 60.0<br>(51.1-53.6) | 61.6<br>(53.8-56.1) | 62.4<br>(56.7-58.7) | 61.3<br>(59.5-61.3) | 61.7<br>(61.9-63.6) | 62.4<br>(64.3-66.2) | 64.4<br>(66.2-68.5) | 64.4<br>(68.5-71.0) |
| Pakistan                    | 48.2<br>(54.6-58.9) | 49.7<br>(56.4-60.3) | 51.1<br>(58.4-61.6) | 52.0<br>(60.5-62.7) | 51.8<br>(61.4-63.4) | 52.0<br>(61.0-63.2) | 51.5<br>(61.3-63.5) | 57.0<br>(60.3-63.2) | 61.2<br>(62.8-66.1) | 61.2<br>(64.3-68.4) |
| Sub-Saharan Africa          | 55.0<br>(46.9-49.4) | 56.4<br>(48.7-50.6) | 57.4<br>(50.3-51.8) | 59.2<br>(51.4-52.6) | 60.2<br>(51.5-52.7) | 60.2<br>(51.2-52.4) | 57.5<br>(50.9-52.0) | 48.1<br>(53.0-54.1) | 51.5<br>(56.3-57.6) | 51.5<br>(60.3-62.0) |
| Southern Sub-Saharan Africa | 54.8<br>(53.3-56.8) | 57.5<br>(55.0-57.7) | 59.3<br>(56.3-58.6) | 61.4<br>(58.5-60.1) | 61.2<br>(59.3-61.2) | 52.6<br>(56.3-58.7) | 44.7<br>(49.3-51.5) | 44.7<br>(47.2-49.1) | 53.9<br>(50.7-52.2) | 61.7<br>(57.4-59.3) |
| Botswana                    | 53.2<br>(53.3-56.2) | 54.3<br>(56.2-58.9) | 55.8<br>(58.1-60.8) | 56.4<br>(60.0-63.0) | 56.6<br>(58.4-64.2) | 53.5<br>(47.2-59.6) | 45.8<br>(39.9-50.8) | 41.1<br>(42.8-50.6) | 43.9<br>(50.7-57.7) | 47.1<br>(58.4-67.0) |
| Lesotho                     | 57.1<br>(50.2-56.2) | 57.7<br>(51.4-57.5) | 57.2<br>(53.0-58.8) | 58.1<br>(54.1-59.3) | 56.7<br>(54.6-58.8) | 51.1<br>(51.3-55.6) | 51.1<br>(43.1-48.4) | 51.1<br>(38.8-43.7) | 55.8<br>(41.7-46.0) | 60.4<br>(44.6-69.7) |
| Namibia                     | 55.0<br>(55.0-59.4) | 56.5<br>(55.9-59.6) | 57.5<br>(55.7-58.9) | 57.9<br>(56.9-59.5) | 57.0<br>(57.0-59.6) | 54.7<br>(54.7-58.5) | 52.5<br>(48.4-53.7) | 49.7<br>(46.8-52.0) | 52.7<br>(53.5-58.4) | 59.2<br>(57.8-63.3) |
| South Africa                | 49.1<br>(53.0-57.5) | 52.4<br>(54.8-58.4) | 55.1<br>(56.0-58.8) | 57.2<br>(57.9-60.0) | 59.1<br>(59.9-61.6) | 55.6<br>(58.9-60.6) | 44.9<br>(51.4-53.5) | 44.7<br>(48.6-50.7) | 44.7<br>(51.7-53.6) | 53.3<br>(57.9-60.3) |
| Swaziland                   | 55.8<br>(45.0-53.1) | 56.9<br>(49.4-55.5) | 58.4<br>(52.3-57.6) | 61.2<br>(54.7-59.7) | 61.2<br>(56.9-61.4) | 59.0<br>(52.6-58.6) | 44.7<br>(41.0-49.1) | 44.7<br>(38.1-44.1) | 47.9<br>(41.9-47.7) | 56.7<br>(50.2-57.1) |
| Zimbabwe                    | 53.0<br>(53.0-58.1) | 54.3<br>(55.0-58.9) | 55.8<br>(56.7-60.0) | 56.4<br>(59.8-62.6) | 56.6<br>(55.5-63.7) | 53.5<br>(46.5-55.4) | 41.1<br>(41.8-48.3) | 43.9<br>(41.8-46.4) | 47.1<br>(46.0-49.6) | 47.0<br>(54.4-59.3) |
| Western Sub-Saharan Africa  | 46.6<br>(46.2-49.3) | 47.8<br>(48.5-51.2) | 49.6<br>(50.7-53.0) | 51.8<br>(52.2-54.2) | 53.3<br>(53.3-54.3) | 54.3<br>(52.6-54.6) | 55.4<br>(54.5-56.5) | 57.4<br>(54.5-56.5) | 59.8<br>(57.3-59.4) | 62.5<br>(60.6-63.1) |
| Benin                       | 44.0<br>(44.4-47.0) | 44.7<br>(46.4-49.1) | 46.8<br>(48.3-50.9) | 48.9<br>(48.3-50.9) | 49.1<br>(50.4-53.1) | 49.0<br>(53.1-55.6) | 50.6<br>(51.1-58.7) | 53.8<br>(56.1-58.7) | 56.7<br>(58.5-61.3) | 59.5<br>(60.9-64.0) |
| Burkina Faso                | 41.0<br>(41.0-45.0) | 44.7<br>(43.2-46.1) | 46.8<br>(45.6-48.1) | 48.9<br>(47.7-50.0) | 49.1<br>(47.9-50.5) | 49.0<br>(47.6-50.5) | 50.6<br>(49.4-51.8) | 53.8<br>(52.7-54.9) | 56.7<br>(55.4-57.9) | 59.5<br>(58.0-60.8) |
| Cameroon                    | 51.3<br>(49.8-53.1) | 53.4<br>(52.0-55.0) | 55.4<br>(54.0-56.8) | 57.3<br>(56.1-58.7) | 57.3<br>(55.8-58.8) | 55.0<br>(53.1-56.7) | 53.1<br>(51.5-54.8) | 53.6<br>(51.9-55.3) | 55.9<br>(54.0-58.0) | 58.3<br>(56.0-60.6) |
| Cape Verde                  | 55.3<br>(52.8-58.2) | 59.4<br>(57.1-61.6) | 62.9<br>(61.3-64.6) | 62.7<br>(61.4-64.1) | 64.1<br>(62.8-65.5) | 63.0<br>(60.9-65.3) | 65.2<br>(62.4-67.9) | 66.0<br>(63.7-69.2) | 67.2<br>(65.7-69.1) | 68.8<br>(66.7-71.1) |
| Chad                        | 46.9<br>(44.5-49.3) | 49.5<br>(47.6-51.3) | 48.0<br>(48.0-50.9) | 51.2<br>(50.0-52.5) | 52.1<br>(50.7-53.3) | 52.2<br>(50.8-53.5) | 50.6<br>(49.2-52.0) | 52.5<br>(50.9-54.1) | 55.1<br>(53.3-56.7) | 58.3<br>(56.4-60.3) |
| Cote d'Ivoire               | 48.9<br>(47.0-50.1) | 51.6<br>(50.4-52.7) | 54.4<br>(53.4-55.4) | 54.6<br>(53.4-55.6) | 52.4<br>(51.0-53.6) | 49.9<br>(48.4-51.3) | 50.2<br>(48.8-51.7) | 51.6<br>(50.1-53.2) | 54.3<br>(52.6-56.0) | 57.7<br>(55.8-59.5) |
| The Gambia                  | 53.5<br>(50.9-56.0) | 55.5<br>(53.4-57.6) | 57.5<br>(56.6-59.5) | 59.4<br>(57.7-61.3) | 60.9<br>(59.2-62.6) | 62.1<br>(60.6-63.7) | 62.3<br>(60.8-63.8) | 62.6<br>(61.2-64.1) | 63.8<br>(62.3-65.3) | 65.5<br>(64.0-66.9) |
| Ghana                       | 54.3<br>(52.7-55.8) | 55.8<br>(54.3-57.5) | 56.7<br>(55.2-58.3) | 57.1<br>(55.6-58.7) | 57.8<br>(56.2-59.4) | 58.4<br>(56.7-60.1) | 58.0<br>(56.6-59.5) | 58.7<br>(57.5-60.0) | 60.9<br>(59.5-62.2) | 64.5<br>(62.8-66.1) |
| Guinea                      | 45.3<br>(42.0-48.6) | 46.5<br>(43.9-48.9) | 48.5<br>(46.3-50.6) | 50.4<br>(48.6-52.1) | 52.1<br>(50.7-53.6) | 53.0<br>(51.6-54.4) | 53.9<br>(52.3-55.3) | 55.3<br>(53.6-57.0) | 57.0<br>(55.0-58.9) | 59.8<br>(57.3-62.1) |
| Guinea-Bissau               | 36.2<br>(32.6-40.0) | 41.7<br>(39.2-44.2) | 43.6<br>(41.5-45.8) | 44.7<br>(42.8-46.8) | 46.6<br>(44.7-48.6) | 48.3<br>(46.6-50.1) | 49.9<br>(48.3-51.6) | 50.8<br>(49.3-52.6) | 53.5<br>(52.0-55.3) | 56.3<br>(54.5-58.2) |
| Liberia                     | 46.1<br>(43.7-48.4) | 47.8<br>(46.8-50.6) | 50.6<br>(49.0-52.3) | 51.6<br>(50.2-53.1) | 48.0<br>(46.6-49.5) | 49.1<br>(47.9-50.3) | 54.1<br>(52.9-55.3) | 58.1<br>(56.8-59.3) | 60.6<br>(59.4-61.8) | 64.0<br>(62.8-65.2) |
| Mali                        | 39.4<br>(37.2-41.9) | 41.2<br>(39.3-43.3) | 44.6<br>(42.9-46.3) | 46.9<br>(45.5-48.4) | 49.4<br>(48.1-50.7) | 51.3<br>(50.0-52.7) | 53.3<br>(51.8-54.9) | 55.9<br>(54.4-57.6) | 58.5<br>(56.6-60.5) | 61.0<br>(58.1-63.8) |
| Mauritania                  | 53.5<br>(50.8-56.4) | 53.7<br>(51.1-56.4) | 56.4<br>(54.3-58.7) | 57.9<br>(56.3-59.6) | 59.5<br>(58.1-61.1) | 61.5<br>(60.0-63.0) | 64.1<br>(62.6-65.5) | 66.0<br>(64.3-67.8) | 68.5<br>(66.4-70.7) | 70.3<br>(67.8-73.2) |
| Niger                       | 41.9<br>(39.4-44.4) | 41.7<br>(39.7-43.7) | 42.7<br>(41.1-44.3) | 43.7<br>(42.1-45.4) | 46.2<br>(44.6-47.7) | 48.6<br>(47.2-50.3) | 51.7<br>(50.2-53.4) | 54.8<br>(53.2-56.6) | 57.8<br>(55.9-59.8) | 60.6<br>(58.2-62.9) |
| Nigeria                     | 49.2<br>(46.6-52.0) | 51.6<br>(49.2-54.0) | 53.6<br>(51.4-55.8) | 54.7<br>(52.9-56.6) | 54.0<br>(52.0-55.9) | 54.0<br>(51.8-56.3) | 54.1<br>(52.1-56.3) | 56.1<br>(54.3-58.1) | 59.6<br>(57.6-61.6) | 63.7<br>(61.2-66.2) |
| Sao Tome and Principe       | 56.3<br>(55.1-57.4) | 59.5<br>(58.2-60.7) | 61.0<br>(59.7-62.2) | 60.5<br>(59.2-61.8) | 61.9<br>(60.5-63.5) | 63.2<br>(61.8-64.8) | 64.0<br>(62.7-65.4) | 65.0<br>(63.6-66.4) | 67.9<br>(66.4-69.4) | 69.0<br>(66.7-71.5) |
| Senegal                     | 46.1<br>(44.7-47.5) | 47.8<br>(46.6-49.1) | 50.9<br>(49.6-52.1) | 53.8<br>(52.7-54.9) | 56.9<br>(55.0-56.9) | 56.9<br>(55.9-57.9) | 58.1<br>(57.0-59.3) | 60.1<br>(59.1-61.3) | 62.4<br>(61.2-63.5) | 64.6<br>(63.3-66.0) |
| Sierra Leone                | 43.7<br>(40.6-46.4) | 45.4<br>(42.9-47.7) | 46.3<br>(44.3-48.2) | 47.2<br>(45.4-48.8) | 48.4<br>(46.8-50.0) | 47.3<br>(45.9-48.8) | 49.1<br>(47.8-50.4) | 49.1<br>(49.9-52.4) | 51.1<br>(52.7-55.5) | 58.1<br>(56.4-59.8) |
| Togo                        | 50.1<br>(48.1-51.9) | 52.5<br>(51.0-54.1) | 54.6<br>(53.3-55.9) | 56.3<br>(54.2-56.7) | 55.3<br>(54.9-57.4) | 54.3<br>(54.0-56.7) | 54.3<br>(52.7-55.9) | 54.3<br>(52.7-55.9) | 56.5<br>(55.0-58.1) | 60.1<br>(58.2-61.7) |
| Eastern Sub-Saharan Africa  | 47.0<br>(45.7-48.5) | 48.1<br>(47.0-49.3) | 49.1<br>(48.1-50.2) | 49.6<br>(48.5-50.4) | 49.5<br>(48.5-50.4) | 50.3<br>(48.9-50.3) | 50.3<br>(49.7-51.0) | 53.8<br>(53.2-54.5) | 57.7<br>(56.9-58.5) | 61.7<br>(60.6-62.9) |
| Burundi                     | 43.7<br>(41.5-46.1) | 44.1<br>(42.0-46.6) | 45.2<br>(43.0-47.6) | 46.5<br>(44.3-48.9) | 46.7<br>(44.4-49.2) | 47.9                |                     |                     |                     |                     |



Appendix Table 13B. Estimates of life expectancy at birth by location, males, 1970, 1975, 1980, 1985, 1990, 1995, 2000, 2005, 2010, 2016

| Location                         | 1970                | 1975                | 1980                | 1985                | 1990                | 1995                | 2000                | 2005                | 2010                | 2016                |
|----------------------------------|---------------------|---------------------|---------------------|---------------------|---------------------|---------------------|---------------------|---------------------|---------------------|---------------------|
| Djibouti                         | 57.1<br>(55.0-59.3) | 58.2<br>(56.3-60.1) | 58.5<br>(56.9-60.2) | 58.5<br>(57.1-59.9) | 58.4<br>(57.2-59.7) | 58.7<br>(57.3-60.2) | 59.0<br>(57.1-61.0) | 59.8<br>(57.7-61.8) | 61.6<br>(59.5-63.6) | 64.7<br>(62.5-66.7) |
| Eritrea                          | 43.2<br>(41.0-45.7) | 45.0<br>(43.4-46.8) | 46.4<br>(45.0-48.0) | 47.9<br>(46.5-49.4) | 51.0<br>(49.5-52.5) | 55.7<br>(54.0-57.3) | 56.9<br>(55.1-58.6) | 59.7<br>(57.7-61.7) | 60.9<br>(58.8-63.1) | 62.9<br>(60.6-65.1) |
| Ethiopia                         | 41.4<br>(39.0-44.1) | 41.2<br>(39.1-43.5) | 42.2<br>(40.2-44.2) | 43.7<br>(42.2-45.4) | 44.4<br>(43.2-45.7) | 49.0<br>(47.6-50.4) | 50.4<br>(49.0-51.8) | 56.0<br>(54.3-57.4) | 60.7<br>(58.5-62.7) | 64.7<br>(62.1-67.6) |
| Kenya                            | 57.7<br>(56.9-58.4) | 59.5<br>(58.8-60.3) | 61.3<br>(60.6-62.1) | 62.1<br>(61.4-62.8) | 60.2<br>(59.4-61.1) | 55.6<br>(54.8-56.6) | 53.7<br>(53.0-54.6) | 56.1<br>(55.4-56.7) | 61.2<br>(60.6-61.9) | 64.7<br>(63.9-65.6) |
| Madagascar                       | 50.4<br>(48.3-52.3) | 52.4<br>(50.4-54.4) | 53.8<br>(52.0-55.7) | 53.2<br>(51.7-54.9) | 54.4<br>(53.1-55.7) | 55.9<br>(54.5-57.3) | 57.6<br>(56.1-59.0) | 59.1<br>(57.3-60.9) | 59.8<br>(57.3-62.5) | 61.5<br>(58.4-64.8) |
| Malawi                           | 42.7<br>(40.2-45.2) | 45.4<br>(43.4-47.5) | 48.3<br>(46.5-50.1) | 49.1<br>(46.9-51.1) | 47.6<br>(44.2-51.2) | 44.7<br>(41.8-48.1) | 43.6<br>(41.1-46.3) | 46.5<br>(44.3-49.0) | 51.2<br>(49.2-53.5) | 57.9<br>(55.3-60.5) |
| Mozambique                       | 46.2<br>(44.0-48.4) | 48.3<br>(46.6-50.0) | 49.1<br>(47.8-50.5) | 42.8<br>(39.3-46.7) | 48.5<br>(47.3-49.7) | 49.1<br>(47.4-50.7) | 49.1<br>(47.0-51.1) | 50.1<br>(47.9-52.4) | 52.2<br>(50.0-54.3) | 57.0<br>(54.9-59.2) |
| Rwanda                           | 45.7<br>(43.3-48.3) | 46.5<br>(44.1-48.7) | 49.3<br>(47.3-51.4) | 51.7<br>(49.9-53.4) | 47.5<br>(45.5-49.5) | 41.8<br>(39.8-43.8) | 47.5<br>(46.0-49.3) | 56.2<br>(54.9-57.9) | 63.0<br>(61.5-64.5) | 66.0<br>(63.9-67.9) |
| Somalia                          | 48.2<br>(45.0-51.3) | 46.3<br>(42.8-49.7) | 49.4<br>(46.7-52.2) | 49.2<br>(46.8-51.7) | 49.6<br>(47.5-51.7) | 50.7<br>(48.6-52.9) | 51.6<br>(49.4-53.7) | 53.5<br>(51.2-55.7) | 52.4<br>(49.6-55.2) | 56.6<br>(54.1-59.1) |
| South Sudan                      | 47.6<br>(42.5-52.2) | 48.8<br>(44.2-52.7) | 49.7<br>(46.5-53.0) | 50.0<br>(47.5-52.6) | 49.9<br>(47.4-52.6) | 52.0<br>(49.5-54.6) | 53.2<br>(50.7-55.9) | 55.6<br>(53.0-58.4) | 57.2<br>(54.6-60.1) | 58.7<br>(56.1-61.5) |
| Tanzania                         | 51.6<br>(50.0-53.1) | 53.4<br>(52.0-54.8) | 54.8<br>(53.6-56.1) | 55.5<br>(54.3-56.7) | 53.7<br>(52.1-55.3) | 51.8<br>(49.7-53.9) | 52.1<br>(50.3-54.1) | 54.6<br>(53.1-56.4) | 58.3<br>(56.7-59.9) | 62.6<br>(60.5-64.5) |
| Uganda                           | 48.8<br>(47.2-50.5) | 49.9<br>(48.4-51.5) | 47.1<br>(44.6-49.9) | 47.4<br>(45.0-49.9) | 46.3<br>(43.4-48.9) | 44.0<br>(41.6-46.7) | 46.3<br>(44.7-48.0) | 50.9<br>(49.5-52.3) | 55.0<br>(53.5-56.4) | 59.8<br>(58.0-61.4) |
| Zambia                           | 55.8<br>(51.7-60.2) | 57.8<br>(54.4-61.8) | 58.0<br>(55.2-61.4) | 56.8<br>(54.1-59.7) | 52.2<br>(49.4-54.8) | 45.8<br>(42.8-48.8) | 43.3<br>(40.9-45.9) | 44.6<br>(42.4-46.7) | 50.0<br>(47.8-52.3) | 55.6<br>(52.5-59.3) |
| Central Sub-Saharan Africa       | 48.3<br>(45.2-51.3) | 49.5<br>(47.0-51.9) | 50.4<br>(48.7-52.1) | 51.4<br>(50.0-52.7) | 50.8<br>(49.7-52.0) | 50.8<br>(49.7-51.9) | 51.4<br>(50.2-52.7) | 54.1<br>(53.0-55.2) | 56.9<br>(55.7-58.2) | 60.6<br>(58.9-62.3) |
| Angola                           | 45.8<br>(41.7-50.0) | 46.6<br>(42.9-50.6) | 47.1<br>(43.9-50.5) | 47.6<br>(44.9-50.7) | 48.3<br>(45.6-51.1) | 50.8<br>(48.0-53.9) | 52.7<br>(49.9-55.9) | 56.2<br>(53.3-59.1) | 59.8<br>(56.8-62.8) | 63.9<br>(60.3-67.1) |
| Central African Republic         | 46.6<br>(43.7-49.6) | 46.6<br>(44.0-49.2) | 47.5<br>(45.2-49.9) | 47.3<br>(45.2-49.3) | 45.4<br>(43.2-47.7) | 43.4<br>(40.8-46.2) | 42.1<br>(39.1-45.1) | 42.9<br>(40.0-46.0) | 45.3<br>(42.2-48.5) | 47.9<br>(44.5-51.6) |
| Congo                            | 49.1<br>(44.7-53.2) | 51.1<br>(47.3-54.9) | 52.9<br>(49.9-56.1) | 54.1<br>(51.5-56.7) | 52.2<br>(50.0-54.6) | 51.2<br>(49.2-53.3) | 52.2<br>(50.3-54.3) | 57.3<br>(55.4-58.9) | 61.6<br>(59.3-64.3) | 63.6<br>(60.1-67.3) |
| Democratic Republic of the Congo | 49.7<br>(45.8-53.4) | 51.0<br>(47.8-53.8) | 51.9<br>(49.5-54.1) | 53.1<br>(51.3-54.8) | 52.3<br>(50.7-53.9) | 51.7<br>(50.0-53.1) | 51.9<br>(50.2-53.5) | 54.3<br>(52.9-55.7) | 56.7<br>(55.0-58.3) | 60.4<br>(58.3-62.4) |
| Equatorial Guinea                | 42.7<br>(38.0-47.3) | 44.4<br>(40.7-48.1) | 46.8<br>(43.8-50.0) | 47.5<br>(44.7-50.5) | 47.5<br>(43.7-49.7) | 46.5<br>(43.5-50.0) | 46.6<br>(49.8-57.3) | 53.5<br>(53.6-62.1) | 57.5<br>(56.6-65.3) | 60.7<br>(60.2-69.1) |
| Gabon                            | 48.8<br>(45.2-52.5) | 51.7<br>(48.6-55.1) | 54.2<br>(51.6-57.1) | 55.5<br>(53.5-57.7) | 56.0<br>(54.3-57.8) | 56.4<br>(54.9-58.3) | 57.5<br>(55.5-59.7) | 59.1<br>(56.7-61.1) | 61.6<br>(59.1-64.0) | 64.9<br>(61.4-68.4) |

Appendix Table 13C: Estimates of life expectancy at birth by location, females, 1970, 1975, 1980, 1985, 1990, 1995, 2000, 2005, 2010, 2016

| Location                  | 1970                | 1975                | 1980                | 1985                | 1990                | 1995                | 2000                | 2005                | 2010                | 2016                |
|---------------------------|---------------------|---------------------|---------------------|---------------------|---------------------|---------------------|---------------------|---------------------|---------------------|---------------------|
| Global                    | 60.5<br>(60.2-60.9) | 62.6<br>(62.3-62.9) | 64.4<br>(64.1-64.7) | 66.0<br>(65.8-66.3) | 67.6<br>(67.3-67.8) | 68.3<br>(68.1-68.5) | 69.4<br>(69.2-69.6) | 71.0<br>(70.8-71.2) | 73.0<br>(72.8-73.3) | 75.3<br>(75.0-75.6) |
| High SDI                  | 74.2<br>(73.9-74.4) | 75.6<br>(75.5-75.8) | 77.1<br>(77.0-77.2) | 78.1<br>(78.0-78.2) | 79.1<br>(79.0-79.2) | 80.0<br>(79.9-80.1) | 80.9<br>(80.9-81.0) | 81.9<br>(81.8-82.0) | 82.9<br>(82.8-83.0) | 83.4<br>(83.2-83.6) |
| High-middle SDI           | 68.1<br>(67.6-68.6) | 69.9<br>(69.5-70.4) | 71.1<br>(70.6-71.5) | 72.4<br>(72.0-72.8) | 73.6<br>(73.2-73.9) | 74.4<br>(74.1-73.8) | 74.9<br>(74.5-75.3) | 76.2<br>(75.7-76.5) | 78.2<br>(77.8-78.5) | 79.8<br>(78.6-80.8) |
| Middle SDI                | 60.4<br>(59.9-61.0) | 63.2<br>(62.7-63.6) | 65.2<br>(64.7-65.6) | 67.3<br>(66.9-67.6) | 69.1<br>(68.8-69.4) | 70.6<br>(70.3-70.8) | 71.9<br>(71.7-72.1) | 73.4<br>(73.2-73.6) | 75.3<br>(75.1-75.5) | 77.4<br>(77.1-77.7) |
| Low-middle SDI            | 50.7<br>(50.1-51.3) | 53.2<br>(52.6-53.9) | 56.0<br>(55.5-56.5) | 58.0<br>(57.6-58.4) | 60.0<br>(59.5-60.4) | 61.2<br>(60.8-61.6) | 62.6<br>(62.3-63.0) | 64.6<br>(64.2-65.0) | 67.2<br>(66.8-67.6) | 69.9<br>(69.4-70.4) |
| Low SDI                   | 48.4<br>(47.5-49.4) | 49.8<br>(49.1-50.5) | 51.2<br>(50.7-51.8) | 52.4<br>(51.8-53.0) | 53.7<br>(53.3-54.2) | 54.1<br>(53.6-54.6) | 54.9<br>(54.5-55.4) | 57.3<br>(56.8-57.8) | 59.9<br>(59.1-60.6) | 64.3<br>(63.5-65.0) |
| High-income               | 74.0<br>(73.7-74.2) | 75.4<br>(75.3-75.6) | 77.1<br>(77.0-77.2) | 78.3<br>(78.2-78.4) | 79.3<br>(79.2-79.4) | 80.2<br>(80.1-80.3) | 81.1<br>(81.0-81.2) | 82.1<br>(82.0-82.2) | 83.0<br>(82.9-83.1) | 83.5<br>(83.3-83.7) |
| High-income North America | 74.8<br>(74.7-74.9) | 76.4<br>(76.3-76.5) | 77.8<br>(77.7-77.9) | 78.4<br>(78.3-78.5) | 79.0<br>(79.0-79.1) | 79.3<br>(79.2-79.4) | 79.8<br>(79.7-79.9) | 80.4<br>(80.3-80.5) | 81.4<br>(81.3-81.5) | 81.5<br>(81.3-81.7) |
| Canada                    | 76.2<br>(75.9-76.5) | 77.3<br>(77.0-77.6) | 78.9<br>(78.5-79.2) | 79.8<br>(79.5-80.2) | 80.6<br>(80.3-80.9) | 81.0<br>(80.7-81.3) | 81.8<br>(81.5-82.1) | 82.5<br>(82.3-82.8) | 83.4<br>(83.2-83.7) | 83.9<br>(83.5-84.3) |
| Greenland                 | 66.6<br>(65.4-67.8) | 64.5<br>(63.4-65.7) | 65.6<br>(64.4-66.8) | 64.5<br>(63.3-65.6) | 66.1<br>(64.7-67.5) | 67.2<br>(65.9-68.5) | 67.5<br>(66.4-68.7) | 68.2<br>(67.1-69.5) | 70.3<br>(69.2-71.6) | 72.8<br>(70.4-75.6) |
| United States             | 74.7<br>(74.6-74.8) | 76.3<br>(76.2-76.4) | 77.7<br>(77.6-77.8) | 78.2<br>(78.1-78.3) | 78.9<br>(78.8-79.0) | 79.2<br>(79.1-79.3) | 79.6<br>(79.5-79.7) | 80.2<br>(80.1-80.3) | 81.2<br>(81.1-81.3) | 81.2<br>(81.0-81.5) |
| Australasia               | 74.6<br>(74.4-74.8) | 76.1<br>(75.8-76.3) | 77.8<br>(77.6-78.0) | 78.6<br>(78.4-78.8) | 79.8<br>(79.6-80.1) | 80.9<br>(80.7-81.2) | 82.1<br>(81.9-82.3) | 83.2<br>(83.0-83.4) | 83.9<br>(83.7-84.1) | 84.4<br>(83.8-85.0) |
| Australia                 | 74.6<br>(74.3-74.9) | 76.2<br>(75.9-76.5) | 78.1<br>(77.8-78.4) | 78.9<br>(78.7-79.2) | 80.1<br>(79.9-80.4) | 81.2<br>(81.0-81.5) | 82.4<br>(82.1-82.6) | 83.4<br>(83.2-83.7) | 84.2<br>(83.9-84.4) | 84.6<br>(83.8-85.3) |
| New Zealand               | 74.7<br>(74.3-75.0) | 75.4<br>(75.0-75.7) | 76.3<br>(76.0-76.7) | 77.2<br>(76.9-77.6) | 78.5<br>(78.2-78.9) | 79.7<br>(79.4-80.0) | 81.0<br>(80.7-81.3) | 81.9<br>(81.6-82.2) | 82.8<br>(82.5-83.1) | 83.4<br>(82.3-84.6) |
| High-income Asia Pacific  | 72.6<br>(71.3-73.7) | 74.9<br>(74.1-75.6) | 77.2<br>(76.9-77.5) | 79.2<br>(78.8-79.5) | 80.7<br>(80.4-81.0) | 82.0<br>(81.7-82.2) | 83.5<br>(83.2-83.7) | 84.7<br>(84.5-85.0) | 85.7<br>(85.5-85.9) | 86.4<br>(85.6-87.1) |
| Brunei                    | 66.2<br>(64.6-68.3) | 70.3<br>(68.9-72.2) | 71.1<br>(68.7-73.1) | 74.0<br>(72.5-75.1) | 75.4<br>(73.9-76.7) | 76.3<br>(74.6-77.6) | 78.2<br>(77.2-79.3) | 78.9<br>(77.9-79.7) | 79.3<br>(78.3-80.0) | 79.5<br>(77.8-81.7) |
| Japan                     | 75.0<br>(74.5-75.4) | 76.9<br>(76.6-77.1) | 78.8<br>(78.8-78.9) | 80.5<br>(80.5-80.6) | 81.8<br>(81.8-81.9) | 82.9<br>(82.8-83.0) | 84.4<br>(84.3-84.4) | 85.4<br>(85.3-85.5) | 86.2<br>(86.1-86.3) | 86.9<br>(86.7-87.2) |
| Singapore                 | 71.8<br>(70.4-73.4) | 73.6<br>(72.2-75.1) | 75.9<br>(73.0-75.7) | 78.1<br>(74.5-77.4) | 79.8<br>(76.5-79.7) | 81.7<br>(78.3-81.4) | 83.2<br>(80.3-83.1) | 84.6<br>(81.9-84.6) | 85.2<br>(84.0-86.4) | 86.0<br>(83.9-88.4) |
| South Korea               | 66.0<br>(60.5-71.9) | 68.3<br>(64.9-71.9) | 72.0<br>(70.5-73.4) | 74.3<br>(72.8-75.8) | 76.3<br>(75.0-77.7) | 78.1<br>(76.9-79.3) | 79.6<br>(78.6-80.7) | 81.7<br>(80.7-82.8) | 83.5<br>(82.4-84.4) | 84.2<br>(81.2-87.1) |
| Western Europe            | 74.6<br>(74.4-74.8) | 75.8<br>(75.6-76.0) | 77.3<br>(77.1-77.4) | 78.4<br>(78.2-78.6) | 79.5<br>(79.3-79.6) | 80.5<br>(80.4-80.7) | 81.5<br>(81.4-81.7) | 82.6<br>(82.4-82.7) | 83.6<br>(83.3-83.6) | 84.1<br>(83.8-84.4) |
| Andorra                   | 80.0<br>(76.5-83.7) | 81.1<br>(78.3-84.6) | 82.1<br>(79.5-85.1) | 82.3<br>(79.9-85.3) | 83.4<br>(80.3-85.3) | 84.9<br>(80.9-85.7) | 85.0<br>(82.5-87.0) | 85.9<br>(83.7-87.5) | 85.8<br>(83.5-87.6) | 85.8<br>(83.0-87.7) |
| Austria                   | 73.5<br>(73.2-73.7) | 74.8<br>(74.5-75.0) | 76.1<br>(75.8-76.3) | 77.3<br>(77.1-77.6) | 78.9<br>(78.6-79.1) | 80.0<br>(79.7-80.2) | 81.2<br>(80.9-81.4) | 82.3<br>(82.0-82.5) | 83.2<br>(82.9-83.4) | 83.9<br>(83.2-84.5) |
| Belgium                   | 74.1<br>(73.7-74.5) | 75.3<br>(74.8-75.7) | 76.6<br>(76.2-77.0) | 77.8<br>(77.4-78.2) | 79.3<br>(78.8-79.7) | 80.2<br>(79.8-80.5) | 81.6<br>(80.5-81.3) | 82.6<br>(81.6-82.4) | 83.6<br>(82.2-83.0) | 84.6<br>(82.3-84.5) |
| Cyprus                    | 72.2<br>(71.6-72.7) | 72.9<br>(72.3-73.5) | 74.4<br>(74.0-74.9) | 75.9<br>(75.5-76.4) | 77.0<br>(76.5-77.4) | 78.0<br>(77.5-78.4) | 79.3<br>(78.8-79.7) | 80.5<br>(80.1-81.0) | 81.8<br>(81.8-82.8) | 82.8<br>(82.3-83.4) |
| Denmark                   | 75.9<br>(75.2-76.6) | 76.9<br>(76.2-77.7) | 77.4<br>(76.7-78.1) | 77.6<br>(76.8-78.4) | 77.7<br>(77.1-78.8) | 77.8<br>(77.5-79.0) | 78.0<br>(78.5-80.0) | 79.2<br>(79.6-81.1) | 80.3<br>(80.8-82.2) | 81.5<br>(81.5-84.2) |
| Finland                   | 74.1<br>(73.8-74.5) | 76.0<br>(75.6-76.3) | 77.9<br>(77.5-78.2) | 79.0<br>(78.3-79.0) | 80.3<br>(78.7-79.3) | 81.2<br>(80.0-80.7) | 82.3<br>(80.9-81.5) | 83.3<br>(82.0-82.7) | 84.6<br>(82.9-83.5) | 86.6<br>(83.9-85.4) |
| France                    | 76.2<br>(75.9-76.5) | 77.2<br>(76.9-77.5) | 78.7<br>(78.4-79.0) | 79.9<br>(79.6-80.2) | 81.2<br>(80.9-81.5) | 82.8<br>(81.9-82.4) | 84.8<br>(82.5-83.1) | 86.6<br>(83.6-84.1) | 88.4<br>(84.4-85.0) | 90.0<br>(84.9-86.0) |
| Germany                   | 73.6<br>(73.1-74.2) | 74.7<br>(74.1-75.2) | 76.2<br>(75.6-76.7) | 77.4<br>(76.9-78.0) | 78.5<br>(78.0-79.1) | 79.7<br>(79.2-80.2) | 80.9<br>(80.4-81.5) | 82.1<br>(81.5-82.4) | 83.3<br>(82.2-83.2) | 83.3<br>(82.5-83.5) |
| Greece                    | 75.5<br>(75.1-75.8) | 76.8<br>(76.4-77.1) | 78.3<br>(79.0-79.7) | 79.3<br>(78.4-79.0) | 80.6<br>(79.2-79.9) | 81.5<br>(80.3-80.9) | 82.4<br>(81.2-81.7) | 83.5<br>(82.1-82.7) | 84.5<br>(82.9-83.4) | 85.3<br>(82.8-84.3) |
| Iceland                   | 76.8<br>(76.2-77.4) | 78.2<br>(77.6-78.8) | 79.7<br>(79.1-80.3) | 80.3<br>(79.7-80.8) | 81.9<br>(79.8-81.0) | 83.0<br>(80.0-81.2) | 84.1<br>(81.3-82.4) | 85.2<br>(82.4-83.6) | 86.3<br>(83.4-84.4) | 87.0<br>(82.9-85.0) |
| Ireland                   | 73.5<br>(72.9-74.2) | 74.3<br>(73.6-74.9) | 75.5<br>(74.9-76.2) | 76.7<br>(76.1-77.4) | 77.8<br>(77.0-78.3) | 78.5<br>(77.9-79.2) | 79.3<br>(78.7-79.9) | 80.2<br>(80.7-81.8) | 81.2<br>(82.0-83.1) | 82.6<br>(82.0-84.1) |
| Israel                    | 71.9<br>(70.2-73.5) | 73.4<br>(72.2-74.5) | 75.4<br>(74.3-76.7) | 77.5<br>(75.3-77.5) | 79.6<br>(76.4-78.6) | 81.3<br>(77.9-80.0) | 82.5<br>(79.5-81.7) | 83.6<br>(80.7-82.9) | 84.6<br>(82.5-84.5) | 85.3<br>(82.2-85.9) |
| Italy                     | 74.5<br>(74.2-74.8) | 76.0<br>(75.7-76.3) | 77.5<br>(77.2-77.7) | 78.9<br>(78.6-79.1) | 80.1<br>(80.0-80.5) | 81.3<br>(81.1-81.5) | 82.5<br>(82.3-82.8) | 83.6<br>(83.4-83.8) | 84.6<br>(84.0-85.3) | 85.3<br>(84.0-85.3) |
| Luxembourg                | 73.6<br>(73.2-74.2) | 74.8<br>(74.2-75.3) | 76.1<br>(75.6-76.6) | 77.3<br>(76.8-77.8) | 78.5<br>(78.0-79.0) | 79.7<br>(79.6-80.6) | 81.6<br>(81.1-82.1) | 82.6<br>(82.1-83.1) | 83.5<br>(83.1-84.0) | 84.6<br>(82.8-85.3) |
| Malta                     | 76.5<br>(70.6-77.0) | 77.8<br>(71.8-73.8) | 79.1<br>(72.6-74.6) | 79.7<br>(74.5-76.6) | 80.1<br>(76.7-78.9) | 80.3<br>(78.4-80.8) | 80.6<br>(78.8-80.8) | 81.6<br>(80.2-82.2) | 82.7<br>(81.5-83.5) | 83.6<br>(82.1-85.3) |
| Netherlands               | 76.0<br>(76.0-77.0) | 77.8<br>(77.3-78.2) | 79.1<br>(78.6-79.6) | 80.3<br>(79.2-80.1) | 81.9<br>(79.8-80.7) | 83.0<br>(79.8-80.7) | 84.1<br>(80.2-81.0) | 85.2<br>(81.2-82.0) | 86.3<br>(82.2-83.2) | 87.0<br>(82.6-84.5) |
| Norway                    | 77.1<br>(76.6-77.5) | 78.0<br>(77.5-78.5) | 79.1<br>(78.6-79.6) | 79.5<br>(79.1-80.0) | 80.1<br>(79.6-80.5) | 80.8<br>(80.3-81.2) | 81.4<br>(80.9-81.8) | 82.4<br>(81.9-82.9) | 83.2<br>(82.7-83.7) | 84.1<br>(83.9-85.3) |
| Portugal                  | 70.6<br>(70.3-70.9) | 73.0<br>(72.7-73.4) | 75.1<br>(74.8-75.4) | 76.7<br>(76.4-77.1) | 77.9<br>(77.6-78.2) | 79.0<br>(78.7-79.4) | 80.2<br>(79.9-80.6) | 81.7<br>(81.4-82.1) | 83.1<br>(82.7-83.3) | 84.0<br>(83.4-84.8) |
| Spain                     | 74.7<br>(74.5-74.9) | 76.4<br>(76.1-76.6) | 78.5<br>(78.3-78.7) | 79.7<br>(79.5-79.9) | 80.6<br>(80.4-80.8) | 81.8<br>(81.6-82.0) | 82.8<br>(82.7-83.0) | 83.7<br>(83.5-83.9) | 84.9<br>(84.7-85.1) | 85.6<br>(85.1-86.0) |
| Sweden                    | 77.0<br>(76.3-77.8) | 78.0<br>(77.4-78.6) | 78.9<br>(78.5-79.3) | 79.9<br>(79.5-80.3) | 80.4<br>(80.1-80.8) | 81.4<br>(81.0-81.8) | 82.0<br>(81.6-82.3) | 82.6<br>(82.3-82.9) | 83.5<br>(83.2-83.9) | 84.0<br>(82.6-85.2) |
| Stockholm                 | 76.3<br>(74.0-78.9) | 77.4<br>(75.6-79.4) | 78.9<br>(78.1-79.7) | 80.1<br>(79.5-80.7) | 81.3<br>(80.6-80.8) | 81.3<br>(80.8-81.9) | 81.9<br>(81.3-82.4) | 82.8<br>(82.3-83.4) | 83.8<br>(83.2-84.4) | 84.2<br>(82.2-86.5) |
| Sweden except Stockholm   | 77.2<br>(76.5-77.8) | 78.1<br>(77.5-78.7) | 78.9<br>(78.5-79.4) | 79.9<br>(79.5-80.3) | 80.5<br>(80.1-80.9) | 81.4<br>(81.0-81.8) | 82.0<br>(81.6-82.4) | 82.6<br>(82.2-83.0) | 83.5<br>(83.1-83.9) | 83.9<br>(82.3-85.3) |
| Switzerland               | 76.0<br>(75.2-76.7) | 78.0<br>(77.2-78.7) | 78.9<br>(78.2-79.6) | 80.2<br>(79.5-80.9) | 80.9<br>(80.2-81.5) | 81.6<br>(80.9-82.2) | 82.6<br>(81.9-83.3) | 83.7<br>(83.1-84.2) | 84.4<br>(83.8-84.9) | 85.2<br>(82.6-87.6) |
| United Kingdom            | 75.0<br>(74.7-75.2) | 75.6<br>(75.4-75.8) | 76.6<br>(76.4-76.7) | 77.5<br>(77.4-77.6) | 78.5<br>(78.3-78.6) | 79.3<br>(79.2-79.4) | 80.2<br>(80.1-80.4) | 81.2<br>(81.1-81.4) | 82.3<br>(82.2-82.5) | 82.9<br>(82.6-83.1) |
| England                   | 75.2<br>(75.0-75.4) | 75.9<br>(75.7-76.0) | 76.8<br>(76.7-76.9) | 77.7<br>(77.6-77.8) | 78.7<br>(78.6-78.8) | 79.5<br>(79.4-79.6) | 80.4<br>(80.4-80.5) | 81.5<br>(81.4-81.6) | 82.6<br>(82.5-82.7) | 83.1<br>(83.0-83.3) |
| East Midlands             | 75.1<br>(74.3-75.9) | 75.8<br>(75.2-76.4) | 76.8<br>(76.4-77.3) | 77.8<br>(77.4-78.1) | 78.6<br>(78.3-78.9) | 79.5<br>(79.1-79.8) | 80.4<br>(80.1-80.7) | 81.3<br>(81.0-81.6) | 82.4<br>(82.1-82.8) | 82.9<br>(82.4-83.4) |
| East of England           | 76.0<br>(75.3-76.7) | 76.7<br>(76.1-77.4) | 77.7<br>(77.2-78.1) | 78.5<br>(78.2-78.8) | 79.5<br>(79.2-79.9) | 80.3<br>(80.0-80.7) | 81.2<br>(80.9-81.5) | 82.2<br>(81.9-82.5) | 83.2<br>(82.9-83.5) | 83.7<br>(83.2-84.2) |
| Greater London            | 75.7<br>(75.3-76.1) | 76.2<br>(75.8-76.5) | 77.1<br>(76.9-77.4) | 78.0<br>(77.8-78.2) | 78.9<br>(78.7-79.1) | 79.6<br>(79.4-79.8) | 80.5<br>(80.3-80.7) | 81.8<br>(81.6-81.9) | 83.2<br>(83.0-83.4) | 83.9<br>(83.6-84.2) |
| North East England        | 73.8<br>(73.1-74.4) | 74.5<br>(73.9-75.1) | 75.5<br>(75.1-75.9) | 76.2<br>(75.9-76.5) | 77.2<br>(76.9-77.5) | 77.9<br>(77.6-78.3) | 79.2<br>(78.9-79.5) | 80.1<br>(79.8-80.4) | 81.3<br>(81.2-82.2) | 81.7<br>(81.2-82.2) |
| North West England        | 74.0<br>(73.5-74.6) | 74.7<br>(74.2-75.2) | 75.6<br>(75.3-75.9) | 76.6<br>(76.3-76.8) | 77.5<br>(77.3-77.7) | 78.3<br>(78.1-78.5) | 79.3<br>(79.0-79.5) | 80.2<br>(80.0-80.5) | 81.3<br>(81.1-81.6) | 81.9<br>(81.5-82.2) |
| South East England        | 76.4<br>(75.8-77.0) | 77.0<br>(76.5-77.5) | 77.9<br>(77.5-78.3) | 78.7<br>(78.4-78.9) | 79.6<br>(79.4-79.9) | 80.4<br>(80.2-80.7) | 81.3<br>(81.1-81.6) | 82.3<br>(82.1-82.6) | 83.9<br>(83.2-83.7) | 83.9<br>(83.5-84.3) |
| South West England        | 76.2<br>(75.5-76.7) | 76.8<br>(76.3-77.3) | 77.7<br>(77.3-78.1) | 78.7<br>(78.4-79.0) | 79.8<br>(79.6-80.1) | 80.6<br>(80.4-80.9) | 81.5<br>(81.2-81.7) | 82.4<br>(82.2-82.7) | 83.5<br>(83.2-83.7) | 83.8<br>(83.4-84.2) |
| West Midlands             | 74.7<br>(74.0-75.4) | 75.4<br>(74.8-76.1) | 76.4<br>(75.9-76.8) | 77.2<br>(77.0-77.6) | 78.2<br>(78.0-78.5) | 79.2<br>(78.9-79.5) | 80.0<br>(79.7-80.4) | 81.1<br>(80.8-81.4) | 82.3<br>(82.0-82.6) | 82.3<br>(82.3-83.2) |
| Yorkshire and the Humber  | 73.7<br>(73.9-75.2) | 74.3<br>(74.7-75.7) | 75.5<br>(75.8-76.5) | 76.5<br>(76.8-77.3) | 77.9<br>(77.9-78.4) | 79.0<br>(78.7-79.2) | 80.0<br>(79.7-80.3) | 81.1<br>(80.7-81.1) | 81.9<br>(81.7-82.2) | 82.8<br>(82.0-82.8) |
| Northern Ireland          | 73.6<br>(73.0-74.4) | 74.2<br>(73.6-75.0) | 75.1<br>(74.7-76.2) | 75.9<br>(75.5-77.4) | 76.8<br>(77.0-78.8) | 77.9<br>(77.9       |                     |                     |                     |                     |

Appendix Table 13C: Estimates of life expectancy at birth by location, females, 1970, 1975, 1980, 1985, 1990, 1995, 2000, 2005, 2010, 2016

| Location                                         | 1970        | 1975        | 1980        | 1985        | 1990        | 1995        | 2000        | 2005        | 2010        | 2016        |
|--------------------------------------------------|-------------|-------------|-------------|-------------|-------------|-------------|-------------|-------------|-------------|-------------|
| Wales                                            | 74.4        | 75.1        | 76.2        | 77.4        | 78.4        | 79.0        | 79.9        | 80.9        | 81.7        | 82.2        |
|                                                  | (72.3-76.4) | (73.2-76.8) | (74.9-77.4) | (76.5-78.3) | (77.5-79.2) | (78.2-79.8) | (79.0-80.7) | (80.2-81.7) | (80.9-82.6) | (80.8-83.5) |
| Southern Latin America                           | 68.5        | 70.8        | 73.4        | 75.1        | 76.1        | 77.5        | 78.5        | 79.3        | 79.9        | 80.9        |
|                                                  | (68.0-69.0) | (70.1-71.5) | (73.1-73.8) | (74.7-75.4) | (75.8-76.5) | (77.1-77.8) | (78.2-78.9) | (79.0-79.7) | (79.5-80.2) | (79.9-81.8) |
| Argentina                                        | 68.9        | 70.9        | 73.4        | 74.8        | 75.8        | 76.9        | 77.9        | 78.6        | 79.1        | 80.0        |
|                                                  | (68.2-69.5) | (70.0-71.7) | (72.9-73.9) | (74.4-75.3) | (75.3-76.3) | (76.5-77.5) | (77.5-78.4) | (78.2-79.1) | (78.6-79.6) | (79.1-80.9) |
| Chile                                            | 66.6        | 70.2        | 73.4        | 75.5        | 76.8        | 78.6        | 80.2        | 81.2        | 82.1        | 83.2        |
|                                                  | (65.7-67.4) | (69.3-71.1) | (72.6-74.2) | (74.7-76.3) | (76.1-77.7) | (77.9-79.4) | (79.6-80.9) | (80.5-81.9) | (81.4-82.7) | (80.2-86.1) |
| Uruguay                                          | 72.0        | 72.3        | 73.8        | 75.2        | 76.5        | 77.5        | 78.7        | 79.4        | 80.2        | 81.1        |
|                                                  | (71.6-72.5) | (71.9-72.7) | (73.4-74.1) | (74.8-75.6) | (76.1-76.9) | (77.1-77.9) | (78.4-79.1) | (79.0-79.7) | (79.8-80.6) | (80.2-81.9) |
| Central Europe, Eastern Europe, and Central Asia | 71.4        | 72.2        | 72.4        | 72.8        | 73.6        | 71.9        | 73.0        | 73.7        | 75.8        | 77.2        |
|                                                  | (70.8-72.0) | (71.7-72.7) | (71.9-72.9) | (72.3-73.2) | (73.1-74.1) | (71.3-72.4) | (72.5-73.5) | (73.1-74.2) | (75.3-76.3) | (75.0-78.9) |
| Eastern Europe                                   | 73.4        | 73.3        | 73.1        | 73.4        | 74.4        | 71.7        | 72.6        | 72.9        | 75.3        | 76.6        |
|                                                  | (72.6-74.2) | (72.5-74.0) | (72.3-73.9) | (72.6-74.1) | (73.6-75.2) | (70.9-72.6) | (71.9-73.4) | (72.0-73.8) | (74.5-76.2) | (73.2-79.7) |
| Belarus                                          | 75.0        | 75.8        | 75.4        | 75.1        | 75.4        | 74.0        | 74.3        | 74.9        | 76.4        | 78.8        |
|                                                  | (74.2-75.8) | (75.1-76.5) | (74.8-76.1) | (74.5-75.8) | (74.8-76.0) | (73.4-74.6) | (73.8-74.9) | (74.3-75.5) | (75.8-76.9) | (76.6-81.0) |
| Estonia                                          | 74.7        | 74.8        | 74.4        | 74.4        | 75.3        | 74.2        | 76.1        | 78.2        | 80.9        | 81.8        |
|                                                  | (74.2-75.2) | (74.2-75.3) | (73.9-74.9) | (73.8-74.9) | (74.8-75.8) | (73.7-74.8) | (75.6-76.7) | (77.7-78.7) | (80.4-81.4) | (80.7-83.5) |
| Latvia                                           | 74.3        | 74.3        | 74.1        | 74.3        | 74.6        | 72.9        | 75.9        | 76.4        | 78.2        | 79.8        |
|                                                  | (73.7-74.9) | (73.7-75.0) | (73.5-74.7) | (73.6-74.8) | (74.0-75.2) | (72.1-73.5) | (75.4-76.6) | (75.8-77.1) | (77.6-78.7) | (78.2-81.3) |
| Lithuania                                        | 75.2        | 75.6        | 75.8        | 75.5        | 76.4        | 74.9        | 77.5        | 77.4        | 78.8        | 80.3        |
|                                                  | (74.7-75.7) | (75.1-76.1) | (75.3-76.2) | (75.0-75.9) | (75.9-76.8) | (74.4-75.4) | (77.0-77.9) | (77.0-77.9) | (78.4-79.3) | (79.4-81.3) |
| Moldova                                          | 65.8        | 67.3        | 68.3        | 68.6        | 70.8        | 68.6        | 71.4        | 72.6        | 73.9        | 76.1        |
|                                                  | (62.4-69.4) | (64.6-70.2) | (66.4-70.2) | (67.2-70.0) | (69.7-71.9) | (67.5-69.7) | (70.3-72.4) | (71.6-73.4) | (72.9-74.9) | (74.6-77.8) |
| Russia                                           | 73.5        | 72.9        | 72.9        | 73.2        | 74.3        | 71.4        | 72.2        | 72.5        | 75.1        | 76.2        |
|                                                  | (72.6-74.7) | (72.0-74.2) | (71.7-74.1) | (72.1-74.2) | (73.2-75.5) | (70.1-72.6) | (71.0-73.3) | (71.2-73.8) | (73.9-76.3) | (71.4-80.7) |
| Ukraine                                          | 73.1        | 73.5        | 73.4        | 73.9        | 74.6        | 72.2        | 73.2        | 73.2        | 75.4        | 77.0        |
|                                                  | (71.8-74.3) | (72.5-74.5) | (72.5-74.3) | (73.1-74.6) | (73.9-75.3) | (71.5-73.0) | (72.4-73.9) | (72.4-73.9) | (74.7-76.2) | (73.5-80.5) |
| Central Europe                                   | 71.9        | 73.3        | 73.6        | 74.1        | 74.8        | 75.2        | 76.6        | 77.8        | 79.1        | 80.3        |
|                                                  | (71.5-72.2) | (72.9-73.6) | (73.4-73.9) | (73.9-74.3) | (74.6-75.0) | (75.0-75.4) | (76.4-76.8) | (77.6-78.0) | (78.9-79.3) | (79.8-80.7) |
| Albania                                          | 68.8        | 72.1        | 74.2        | 75.3        | 76.8        | 77.5        | 77.5        | 77.6        | 79.0        | 80.7        |
|                                                  | (65.4-71.6) | (69.4-74.3) | (72.5-75.9) | (74.3-76.2) | (76.2-77.4) | (76.8-78.0) | (77.0-78.1) | (77.0-78.1) | (78.2-79.8) | (79.4-82.1) |
| Bosnia and Herzegovina                           | 69.4        | 71.1        | 72.6        | 73.8        | 75.1        | 73.0        | 73.7        | 73.3        | 79.3        | 80.2        |
|                                                  | (66.0-72.5) | (68.0-73.9) | (70.5-75.0) | (72.2-75.7) | (73.8-76.7) | (71.5-74.7) | (76.1-79.2) | (77.0-79.7) | (78.0-80.6) | (78.4-82.1) |
| Bulgaria                                         | 73.2        | 73.7        | 73.9        | 74.4        | 74.7        | 74.5        | 74.8        | 75.4        | 78.5        | 78.5        |
|                                                  | (72.8-73.6) | (73.3-74.1) | (73.6-74.3) | (74.1-74.8) | (74.4-75.1) | (74.4-75.2) | (74.8-75.5) | (75.9-76.6) | (77.0-77.7) | (76.5-80.4) |
| Croatia                                          | 71.5        | 73.0        | 74.2        | 74.9        | 76.2        | 77.6        | 78.2        | 79.7        | 80.5        | 80.5        |
|                                                  | (68.4-74.8) | (69.6-76.1) | (71.1-76.8) | (73.7-76.1) | (75.2-76.9) | (75.3-77.2) | (76.8-78.4) | (77.9-79.5) | (79.0-80.4) | (79.0-82.1) |
| Czech Republic                                   | 73.2        | 74.0        | 74.1        | 74.7        | 75.6        | 76.9        | 78.4        | 79.4        | 80.6        | 81.9        |
|                                                  | (72.9-73.5) | (73.7-74.2) | (73.9-74.4) | (74.5-75.0) | (75.3-75.8) | (76.6-77.2) | (78.1-78.6) | (79.1-79.7) | (80.3-80.8) | (81.3-82.5) |
| Hungary                                          | 72.0        | 72.4        | 72.9        | 73.2        | 73.9        | 74.7        | 76.1        | 77.3        | 78.4        | 79.1        |
|                                                  | (71.4-72.7) | (71.9-73.0) | (72.2-73.5) | (72.5-73.8) | (73.2-74.6) | (74.1-75.4) | (75.5-76.7) | (76.7-78.0) | (77.8-78.9) | (77.7-80.3) |
| Macedonia                                        | 69.6        | 71.1        | 71.5        | 72.5        | 72.9        | 73.6        | 74.6        | 75.3        | 76.4        | 77.4        |
|                                                  | (66.5-72.0) | (68.4-73.1) | (69.8-73.0) | (71.2-73.7) | (72.1-73.7) | (72.9-74.2) | (74.0-75.2) | (74.6-76.0) | (75.8-77.0) | (76.6-78.1) |
| Montenegro                                       | 75.2        | 75.6        | 76.9        | 77.3        | 77.8        | 77.0        | 76.9        | 77.9        | 79.2        | 79.7        |
|                                                  | (73.6-76.7) | (74.0-77.4) | (75.4-78.2) | (75.6-78.4) | (76.6-78.8) | (76.1-77.9) | (76.1-77.7) | (77.3-78.6) | (78.3-80.0) | (78.7-81.2) |
| Poland                                           | 73.2        | 74.5        | 74.7        | 74.8        | 75.4        | 76.3        | 77.9        | 79.4        | 80.5        | 81.7        |
|                                                  | (72.8-73.7) | (74.0-74.9) | (74.3-75.0) | (74.4-75.3) | (75.0-75.9) | (75.9-76.7) | (77.5-78.4) | (78.9-79.8) | (80.1-80.9) | (80.6-82.8) |
| Romania                                          | 70.5        | 72.3        | 72.3        | 72.9        | 73.4        | 73.4        | 74.8        | 76.0        | 78.9        | 79.9        |
|                                                  | (70.0-71.1) | (71.7-72.9) | (71.7-72.8) | (72.3-73.4) | (72.6-73.8) | (72.8-74.0) | (74.2-75.4) | (75.5-76.6) | (77.0-78.2) | (77.7-80.1) |
| Serbia                                           | 72.2        | 73.6        | 74.5        | 75.1        | 75.6        | 73.9        | 74.9        | 75.9        | 77.3        | 78.8        |
|                                                  | (70.6-73.8) | (72.1-75.2) | (73.1-76.0) | (73.9-76.4) | (74.6-76.7) | (73.3-74.8) | (74.2-75.6) | (75.2-76.6) | (76.8-77.9) | (78.1-79.4) |
| Slovakia                                         | 73.0        | 74.0        | 74.4        | 74.8        | 75.4        | 76.4        | 77.4        | 78.4        | 79.3        | 80.4        |
|                                                  | (72.5-73.6) | (73.5-74.4) | (73.9-74.9) | (74.3-75.3) | (74.9-75.9) | (75.9-76.9) | (76.8-77.9) | (77.7-78.6) | (78.8-79.7) | (79.1-81.8) |
| Slovenia                                         | 82.8        | 83.4        | 84.6        | 85.8        | 87.4        | 89.8        | 91.1        | 92.4        | 93.8        | 95.3        |
|                                                  | (68.2-76.1) | (70.6-76.5) | (72.8-76.6) | (74.8-76.8) | (76.6-78.5) | (77.4-79.3) | (79.0-80.6) | (80.2-82.1) | (81.9-83.6) | (82.5-85.3) |
| Central Asia                                     | 65.3        | 67.5        | 69.2        | 70.3        | 71.0        | 69.3        | 70.1        | 70.9        | 72.9        | 75.1        |
|                                                  | (63.4-67.1) | (65.9-69.0) | (68.3-70.0) | (69.6-70.9) | (70.5-71.4) | (68.7-69.9) | (69.5-70.6) | (70.2-71.5) | (72.3-73.4) | (74.1-76.0) |
| Armenia                                          | 68.5        | 71.2        | 72.9        | 73.6        | 73.5        | 72.9        | 75.3        | 75.3        | 76.9        | 79.3        |
|                                                  | (65.1-71.6) | (68.6-74.0) | (71.4-74.4) | (72.7-74.5) | (72.9-74.5) | (72.6-74.3) | (74.6-76.1) | (75.0-76.7) | (75.6-77.2) | (78.0-80.7) |
| Azerbaijan                                       | 64.5        | 67.8        | 69.1        | 69.4        | 69.8        | 69.9        | 69.9        | 69.9        | 72.8        | 75.2        |
|                                                  | (60.7-68.1) | (64.8-70.9) | (67.0-71.2) | (68.0-70.8) | (68.9-71.4) | (67.6-70.2) | (68.6-71.0) | (69.5-72.3) | (70.9-73.6) | (73.5-77.9) |
| Georgia                                          | 68.5        | 71.1        | 73.7        | 73.7        | 73.7        | 74.5        | 76.4        | 77.7        | 78.8        | 80.5        |
|                                                  | (65.0-72.2) | (68.0-74.5) | (71.4-75.2) | (72.7-74.8) | (72.6-74.8) | (73.6-75.5) | (74.7-76.7) | (75.5-77.2) | (76.8-78.4) | (76.6-81.4) |
| Kazakhstan                                       | 68.0        | 69.3        | 70.8        | 72.0        | 72.6        | 69.6        | 70.7        | 70.7        | 76.2        | 78.5        |
|                                                  | (63.5-73.0) | (65.0-73.9) | (68.5-73.3) | (70.5-73.6) | (71.3-73.8) | (68.1-71.1) | (68.6-71.7) | (69.2-72.3) | (72.2-74.6) | (73.9-78.5) |
| Kyrgyzstan                                       | 63.3        | 65.9        | 68.3        | 69.1        | 70.1        | 68.5        | 70.6        | 72.6        | 74.9        | 76.9        |
|                                                  | (60.3-66.7) | (62.8-68.7) | (67.0-69.6) | (68.4-69.8) | (69.5-70.7) | (67.9-69.2) | (69.9-71.3) | (70.1-71.3) | (72.0-73.2) | (73.8-76.1) |
| Mongolia                                         | 53.6        | 57.7        | 59.6        | 61.0        | 62.5        | 64.6        | 65.7        | 68.2        | 70.4        | 73.0        |
|                                                  | (53.6-57.7) | (57.7-62.0) | (59.6-63.1) | (61.4-65.0) | (63.8-66.8) | (63.4-65.8) | (64.5-66.8) | (67.1-69.3) | (70.1-72.5) | (71.1-75.1) |
| Tajikistan                                       | 57.3        | 59.7        | 63.1        | 66.0        | 67.4        | 66.5        | 67.4        | 69.7        | 72.2        | 74.3        |
|                                                  | (53.3-61.1) | (56.8-62.4) | (60.9-65.3) | (64.2-67.8) | (65.8-69.1) | (64.7-68.2) | (66.0-69.1) | (68.2-71.0) | (70.5-73.8) | (72.4-76.1) |
| Turkmenistan                                     | 59.3        | 62.1        | 64.7        | 66.3        | 67.1        | 66.8        | 67.7        | 69.5        | 71.7        | 74.0        |
|                                                  | (55.5-62.7) | (59.0-65.1) | (62.6-66.5) | (64.9-67.6) | (66.1-68.1) | (65.7-67.7) | (66.5-68.8) | (68.2-70.6) | (70.5-72.8) | (72.7-75.1) |
| Uzbekistan                                       | 66.1        | 68.1        | 69.4        | 70.6        | 71.3        | 69.1        | 69.4        | 69.7        | 71.9        | 73.5        |
|                                                  | (63.4-68.7) | (65.7-70.4) | (67.7-71.1) | (69.4-71.7) | (70.3-72.2) | (68.1-70.0) | (68.4-70.4) | (68.6-70.8) | (70.9-72.8) | (71.9-75.1) |
| Latin America and Caribbean                      | 63.5        | 66.6        | 69.1        | 70.5        | 72.7        | 73.9        | 75.6        | 76.8        | 76.7        | 78.9        |
|                                                  | (62.8-64.2) | (66.2-67.0) | (68.8-69.5) | (70.2-70.8) | (72.5-72.9) | (73.7-74.1) | (75.4-75.9) | (76.6-77.0) | (75.7-77.6) | (78.4-79.3) |
| Central Latin America                            | 64.6        | 67.3        | 70.3        | 71.7        | 74.3        | 75.4        | 77.0        | 77.7        | 78.5        | 79.4        |
|                                                  | (64.2-65.0) | (66.9-67.7) | (69.9-70.6) | (71.4-72.0) | (74.0-74.5) | (75.1-75.7) | (76.7-77.2) | (77.5-78.0) | (78.2-78.8) | (79.0-79.9) |
| Colombia                                         | 68.1        | 68.7        | 71.5        | 71.4        | 75.1        | 75.8        | 77.1        | 78.1        | 79.4        | 81.0        |
|                                                  | (67.4-68.7) | (68.1-69.3) | (70.9-72.2) | (70.6-72.3) | (74.7-75.6) | (75.4-76.2) | (76.7-77.5) | (77.7-78.5) | (79.0-79.8) | (80.0-82.1) |
| Costa Rica                                       | 70.3        | 73.6        | 76.7        | 78.0        | 78.9        | 79.5        | 80.5        | 81.9        | 82.9        | 83.6        |
|                                                  | (69.7-70.9) | (73.0-74.1) | (76.1-77.2) | (77.5-78.6) | (78.3-79.4) | (79.0-80.1) | (80.1-81.0) | (81.4-82.3) | (82.4-83.4) | (82.6-84.5) |
| El Salvador                                      | 61.5        | 65.1        | 68.2        | 69.2        | 72.5        | 74.3        | 76.5        | 77.1        | 78.2        | 79.1        |
|                                                  | (60.2-62.8) | (64.1-66.2) | (67.1-69.3) | (68.2-70.1) | (71.8-73.2) | (73.6-75.0) | (75.8-77.1) | (76.5-77.8) | (77.5-78.8) | (77.6-80.5) |
| Guatemala                                        | 52.0        | 57.3        | 61.3        | 63.7        | 66.5        | 69.6        | 72.0        | 73.4        | 74.6        | 76.0        |
|                                                  | (49.6-54.4) | (55.1-59.7) | (59.1-63.5) | (61.9-65.7) | (64.8-68.4) | (67.7-71.4) | (69.9-74.2) | (71.5-75.3) | (72.5-76.8) | (72.4-76.0) |
| Honduras                                         | 58.2        | 61.6        | 64.5        | 65.2        | 67.2        | 68.9        | 70.2        | 71.4        | 72.6        | 73.7        |
|                                                  | (56.3-60.2) | (59.4-63.6) | (62.6-66.4) | (63.6-66.9) | (65.7-68.9) | (67.0-70.7) | (67.4-72.9) | (68.2-75.0) | (69.1-76.6) | (70.4-77.7) |
| Mexico                                           | 64.4        | 67.5        | 70.4        | 72.4        | 74.8        | 75.9        | 77.4        | 77.9        | 78.4        | 79.1        |
|                                                  | (63.7-65.2) | (66.8-68.1) | (69.9-70.8) | (72.0-72.8) | (74.5-75.1) | (75.6-76.2) | (77.1-77.7) | (77.5-78.2) | (78.0-78.7) | (78.7-79.6) |
| Nicaragua                                        | 60.8        | 67.5        | 69.9        | 69.8        | 76.4        | 76.7        | 78.4        | 79.4        | 80.0        | 81.2        |
|                                                  | (59.5-62.0) | (66.7-68.3) | (68.5-71.3) | (67.6-72.3) | (75.9-77.0) | (76.0-77.4) | (77.8-79.0) | (78.8-80.0) | (79.5-80.6) | (79.2-83.2) |
| Panama                                           | 69.4        | 73.2        | 75.9        | 76.8        | 77.5        | 78.5        | 79.6        | 80.2        | 80.9        | 82.0        |
|                                                  | (68.3-70.5) | (72.3-74.2) | (75.0-76.9) | (75.8-77.7) | (76.7-78.5) | (77.5-79.3) | (78.7-80.4) | (79.3-81.1) | (80.1-81.8) | (80.4-83.6) |
| Venezuela                                        | 68.5        | 69.9        | 72.5        | 74.2        | 75          |             |             |             |             |             |

Appendix Table 13C: Estimates of life expectancy at birth by location, females, 1970, 1975, 1980, 1985, 1990, 1995, 2000, 2005, 2010, 2016

| Location                               | 1970                | 1975                | 1980                | 1985                | 1990                | 1995                | 2000                | 2005                | 2010                | 2016                |
|----------------------------------------|---------------------|---------------------|---------------------|---------------------|---------------------|---------------------|---------------------|---------------------|---------------------|---------------------|
| Barbados                               | 71.3<br>(69.9-72.6) | 73.1<br>(72.0-74.2) | 74.9<br>(73.9-75.9) | 75.8<br>(74.7-76.7) | 76.2<br>(75.1-77.1) | 76.5<br>(75.3-77.6) | 77.5<br>(76.4-78.6) | 78.3<br>(77.4-79.2) | 79.2<br>(78.2-80.1) | 78.7<br>(77.3-80.1) |
| Belize                                 | 68.2<br>(66.4-69.9) | 70.2<br>(68.9-71.5) | 71.1<br>(69.6-72.7) | 73.0<br>(71.5-74.2) | 73.9<br>(72.7-75.2) | 73.9<br>(72.9-75.0) | 72.1<br>(71.0-73.0) | 73.1<br>(72.1-73.9) | 74.2<br>(73.2-75.3) | 74.9<br>(73.1-76.8) |
| Bermuda                                | 69.8<br>(68.7-70.8) | 71.6<br>(70.5-72.6) | 72.5<br>(71.4-73.5) | 72.9<br>(71.8-73.9) | 72.9<br>(71.9-74.0) | 73.7<br>(72.7-74.8) | 75.0<br>(74.1-76.0) | 77.5<br>(76.4-78.4) | 79.8<br>(78.9-81.0) | 82.4<br>(80.7-84.5) |
| Cuba                                   | 73.6<br>(73.1-74.1) | 75.2<br>(74.7-75.7) | 76.2<br>(75.6-76.7) | 76.7<br>(76.1-77.3) | 77.0<br>(76.4-77.6) | 77.5<br>(76.8-78.0) | 78.8<br>(78.2-79.3) | 79.7<br>(79.2-80.2) | 80.5<br>(80.0-81.0) | 81.3<br>(80.3-82.4) |
| Dominica                               | 67.8<br>(66.4-69.2) | 71.1<br>(70.0-72.3) | 73.9<br>(72.8-75.0) | 74.3<br>(73.3-75.3) | 73.7<br>(72.7-74.7) | 73.8<br>(72.9-74.7) | 75.3<br>(74.2-76.6) | 76.0<br>(74.8-77.1) | 75.8<br>(74.6-76.8) | 75.8<br>(73.9-77.4) |
| Dominican Republic                     | 66.4<br>(65.1-67.8) | 68.7<br>(67.4-70.1) | 70.8<br>(69.5-72.1) | 71.6<br>(70.6-73.0) | 72.7<br>(72.0-73.6) | 74.4<br>(73.5-75.4) | 76.0<br>(75.1-77.4) | 76.4<br>(75.1-78.0) | 77.6<br>(76.1-79.4) | 78.6<br>(76.9-80.6) |
| Grenada                                | 69.4<br>(66.7-71.7) | 71.8<br>(69.5-74.3) | 72.7<br>(70.4-75.1) | 72.4<br>(70.3-74.5) | 73.1<br>(71.5-74.3) | 73.9<br>(72.5-75.0) | 74.1<br>(72.8-75.4) | 73.9<br>(72.5-75.2) | 74.1<br>(72.7-75.4) | 74.4<br>(72.3-76.7) |
| Guyana                                 | 63.2<br>(62.0-64.4) | 64.5<br>(63.4-65.8) | 66.3<br>(65.1-67.5) | 67.4<br>(66.3-68.6) | 67.8<br>(66.8-68.9) | 68.3<br>(67.4-69.2) | 69.0<br>(67.9-70.0) | 68.1<br>(67.0-69.2) | 68.5<br>(67.4-69.6) | 71.2<br>(69.6-72.9) |
| Haiti                                  | 47.1<br>(44.2-50.4) | 49.4<br>(46.7-52.7) | 51.2<br>(48.7-54.0) | 53.0<br>(51.0-55.1) | 54.3<br>(52.6-56.1) | 55.5<br>(53.7-57.2) | 57.0<br>(54.9-59.0) | 57.9<br>(55.7-60.3) | 36.1<br>(25.0-54.7) | 64.4<br>(61.4-67.5) |
| Jamaica                                | 70.9<br>(69.7-72.1) | 72.9<br>(71.4-74.3) | 73.2<br>(71.9-74.6) | 74.0<br>(72.9-75.2) | 75.4<br>(74.0-76.6) | 75.4<br>(73.6-77.2) | 75.4<br>(74.1-76.7) | 76.0<br>(74.8-77.3) | 76.4<br>(74.9-77.9) | 76.8<br>(74.5-79.1) |
| Puerto Rico                            | 75.2<br>(74.6-75.8) | 76.2<br>(75.6-76.8) | 77.7<br>(77.1-78.3) | 77.7<br>(76.9-78.4) | 78.4<br>(77.9-79.1) | 78.6<br>(78.1-79.3) | 80.1<br>(79.4-80.8) | 80.9<br>(80.3-81.5) | 81.8<br>(81.2-82.3) | 82.4<br>(81.3-83.5) |
| Saint Lucia                            | 67.7<br>(64.9-69.6) | 69.2<br>(67.8-70.4) | 71.1<br>(70.0-72.1) | 72.5<br>(71.4-73.5) | 74.3<br>(73.2-75.2) | 75.6<br>(74.8-76.5) | 76.8<br>(75.9-77.6) | 77.3<br>(76.3-78.1) | 78.7<br>(77.9-79.6) | 79.3<br>(78.1-80.4) |
| Saint Vincent and the Grenadines       | 66.9<br>(64.4-69.2) | 68.9<br>(66.8-70.6) | 71.0<br>(69.4-72.6) | 72.3<br>(71.1-73.4) | 72.7<br>(71.7-73.7) | 72.5<br>(71.5-73.3) | 72.8<br>(71.9-73.6) | 73.7<br>(73.1-74.5) | 74.4<br>(73.6-75.3) | 74.8<br>(73.7-76.1) |
| Suriname                               | 66.4<br>(65.1-67.7) | 67.4<br>(66.4-68.4) | 68.6<br>(67.9-69.4) | 71.0<br>(70.4-71.7) | 72.5<br>(71.9-73.2) | 72.7<br>(72.0-73.4) | 72.2<br>(71.4-72.9) | 72.3<br>(71.5-73.1) | 73.4<br>(72.6-74.2) | 74.4<br>(73.1-75.4) |
| Trinidad and Tobago                    | 67.5<br>(66.9-68.2) | 68.7<br>(68.1-69.4) | 70.6<br>(70.0-71.2) | 71.6<br>(71.0-72.3) | 71.9<br>(71.3-72.6) | 72.3<br>(71.6-73.0) | 72.6<br>(71.9-73.3) | 74.7<br>(74.0-75.4) | 76.3<br>(75.3-77.2) | 77.0<br>(75.6-78.2) |
| Virgin Islands, U.S.                   | 70.7<br>(69.2-71.9) | 72.2<br>(70.8-73.2) | 73.6<br>(72.5-74.6) | 75.2<br>(74.2-76.3) | 76.1<br>(75.2-77.5) | 76.4<br>(75.3-77.5) | 77.2<br>(76.2-78.3) | 77.7<br>(76.8-78.5) | 78.1<br>(77.3-79.0) | 78.8<br>(77.5-80.1) |
| Tropical Latin America                 | 64.6<br>(63.4-65.8) | 67.1<br>(66.2-67.9) | 69.5<br>(68.8-70.2) | 70.6<br>(70.1-71.2) | 72.5<br>(72.0-72.9) | 73.7<br>(73.3-74.1) | 75.3<br>(74.9-75.7) | 76.7<br>(76.3-77.1) | 77.8<br>(77.4-78.2) | 78.9<br>(78.4-79.4) |
| Brazil                                 | 69.0<br>(63.4-65.9) | 69.4<br>(66.1-67.9) | 70.6<br>(68.7-70.1) | 70.6<br>(70.0-71.1) | 72.4<br>(71.9-72.8) | 73.6<br>(73.2-74.1) | 75.3<br>(74.8-75.7) | 76.9<br>(76.3-77.1) | 78.1<br>(77.5-78.3) | 79.1<br>(78.5-79.5) |
| Paraguay                               | 70.9<br>(70.1-71.6) | 72.2<br>(71.2-72.9) | 73.7<br>(72.9-74.4) | 74.8<br>(74.1-75.4) | 76.3<br>(75.5-77.0) | 76.4<br>(75.4-77.1) | 76.6<br>(75.8-77.2) | 76.3<br>(75.3-77.1) | 76.3<br>(75.5-77.3) | 77.1<br>(75.7-78.5) |
| Southeast Asia, East Asia, and Oceania | 61.0<br>(60.3-61.8) | 63.4<br>(62.8-64.0) | 65.3<br>(64.8-65.8) | 67.4<br>(66.9-67.8) | 69.2<br>(68.4-69.2) | 70.2<br>(69.8-70.5) | 71.8<br>(71.5-72.1) | 72.5<br>(73.8-74.2) | 74.0<br>(76.0-76.4) | 74.8<br>(78.1-78.6) |
| East Asia                              | 62.3<br>(61.4-63.2) | 64.8<br>(64.0-65.5) | 66.1<br>(65.3-66.8) | 68.1<br>(67.4-68.7) | 69.7<br>(68.8-70.0) | 70.7<br>(70.2-71.2) | 72.5<br>(72.1-72.9) | 75.2<br>(74.9-75.5) | 77.6<br>(77.3-77.8) | 79.9<br>(79.5-80.1) |
| China                                  | 62.0<br>(61.1-62.9) | 64.5<br>(63.7-65.3) | 65.8<br>(65.0-66.5) | 67.9<br>(67.2-68.5) | 69.2<br>(68.6-69.8) | 70.7<br>(70.3-71.2) | 72.7<br>(72.3-73.0) | 75.2<br>(74.9-75.5) | 77.6<br>(77.3-77.9) | 79.9<br>(79.6-80.2) |
| North Korea                            | 69.2<br>(67.3-71.0) | 71.9<br>(70.1-73.5) | 73.1<br>(71.6-74.7) | 73.6<br>(72.2-75.2) | 74.1<br>(72.8-75.7) | 66.7<br>(60.2-72.5) | 66.3<br>(60.7-71.7) | 66.3<br>(71.2-73.8) | 72.4<br>(71.8-74.1) | 73.6<br>(72.5-74.7) |
| Taiwan (Province of China)             | 71.3<br>(70.7-71.9) | 73.4<br>(72.8-73.9) | 74.3<br>(73.7-74.9) | 75.7<br>(75.2-76.2) | 76.9<br>(76.4-77.4) | 77.8<br>(77.3-78.3) | 79.2<br>(78.7-79.8) | 80.8<br>(80.3-81.2) | 82.3<br>(81.8-82.8) | 82.8<br>(81.4-84.4) |
| Southeast Asia                         | 57.7<br>(56.9-58.5) | 59.9<br>(58.8-61.0) | 63.4<br>(62.9-64.0) | 65.7<br>(65.2-66.2) | 67.5<br>(67.1-68.0) | 69.1<br>(68.7-69.5) | 70.3<br>(70.0-70.7) | 73.5<br>(71.5-72.2) | 75.5<br>(73.2-73.9) | 75.5<br>(75.0-76.0) |
| Cambodia                               | 49.4<br>(46.9-51.8) | 30.5<br>(19.3-49.6) | 55.2<br>(53.5-57.0) | 56.7<br>(55.2-58.3) | 59.2<br>(58.3-60.4) | 60.1<br>(59.3-61.0) | 61.9<br>(61.0-62.8) | 65.5<br>(64.6-66.4) | 69.0<br>(68.1-70.0) | 71.6<br>(70.5-72.7) |
| Indonesia                              | 54.7<br>(53.9-55.4) | 57.5<br>(56.6-58.3) | 60.2<br>(59.6-60.9) | 62.8<br>(62.2-63.4) | 64.9<br>(64.3-65.4) | 67.0<br>(66.6-67.5) | 68.4<br>(68.1-68.8) | 70.0<br>(69.5-70.4) | 71.6<br>(71.0-72.1) | 73.6<br>(73.0-74.1) |
| Laos                                   | 44.2<br>(38.5-49.1) | 47.2<br>(43.0-51.0) | 49.4<br>(46.5-52.1) | 52.3<br>(50.5-53.9) | 54.2<br>(52.7-55.5) | 56.3<br>(54.9-57.5) | 59.0<br>(57.7-60.2) | 62.4<br>(61.2-63.5) | 66.1<br>(64.9-67.2) | 69.7<br>(68.0-71.1) |
| Malaysia                               | 66.5<br>(66.0-66.9) | 69.0<br>(68.6-69.5) | 71.1<br>(70.6-71.6) | 72.7<br>(72.3-73.1) | 73.7<br>(73.4-74.0) | 74.5<br>(74.2-74.8) | 75.3<br>(75.0-75.5) | 75.9<br>(75.6-76.1) | 76.5<br>(76.1-76.8) | 78.0<br>(77.5-78.6) |
| Maldives                               | 39.4<br>(35.8-43.2) | 44.2<br>(40.8-47.8) | 47.7<br>(45.0-50.9) | 54.6<br>(53.2-55.8) | 62.0<br>(60.9-63.2) | 68.1<br>(66.6-69.6) | 72.7<br>(71.7-73.8) | 76.7<br>(75.7-77.7) | 79.5<br>(78.5-80.5) | 81.3<br>(78.6-83.9) |
| Mauritius                              | 63.5<br>(63.0-64.1) | 66.9<br>(66.3-67.4) | 70.1<br>(69.5-70.7) | 71.5<br>(70.9-72.0) | 73.4<br>(72.9-73.9) | 74.7<br>(73.8-74.9) | 74.8<br>(74.3-75.3) | 74.8<br>(75.1-76.2) | 76.9<br>(76.4-77.4) | 79.9<br>(76.0-79.6) |
| Myanmar                                | 51.3<br>(48.8-53.5) | 55.2<br>(53.2-57.3) | 59.7<br>(56.1-59.7) | 59.7<br>(58.1-61.3) | 60.9<br>(59.5-62.3) | 62.1<br>(60.6-63.4) | 63.8<br>(62.3-65.2) | 66.6<br>(65.2-67.8) | 70.0<br>(68.7-71.1) | 73.4<br>(72.4-74.3) |
| Philippines                            | 67.1<br>(65.4-67.2) | 68.5<br>(66.3-68.0) | 69.4<br>(67.7-69.3) | 70.9<br>(68.6-70.1) | 72.2<br>(70.2-71.6) | 73.7<br>(71.3-72.7) | 75.3<br>(71.4-72.9) | 76.9<br>(71.3-72.9) | 78.0<br>(71.8-73.4) | 79.1<br>(72.1-75.8) |
| Sri Lanka                              | 66.5<br>(65.7-67.4) | 67.0<br>(66.2-67.9) | 71.2<br>(70.3-72.0) | 73.5<br>(72.7-74.3) | 75.4<br>(74.6-76.3) | 77.1<br>(75.1-77.1) | 78.9<br>(76.1-77.9) | 80.8<br>(76.9-78.9) | 81.1<br>(77.0-79.5) | 81.1<br>(78.7-83.8) |
| Seychelles                             | 64.8<br>(66.2-69.9) | 67.9<br>(69.8-72.5) | 69.7<br>(72.7-75.4) | 72.0<br>(75.4-74.1) | 74.1<br>(73.5-74.8) | 75.9<br>(75.1-77.1) | 75.6<br>(75.0-76.4) | 75.9<br>(75.3-76.9) | 77.1<br>(76.2-77.9) | 77.4<br>(76.2-78.9) |
| Thailand                               | 64.8<br>(64.0-65.6) | 67.9<br>(67.2-68.7) | 69.7<br>(69.0-70.5) | 72.0<br>(71.3-72.7) | 74.1<br>(73.4-74.7) | 74.9<br>(74.3-75.6) | 75.6<br>(74.9-76.4) | 77.4<br>(76.8-77.9) | 79.4<br>(79.0-80.2) | 80.9<br>(79.6-82.0) |
| Timor-Leste                            | 43.1<br>(38.6-47.5) | 44.0<br>(40.4-47.9) | 47.4<br>(44.2-51.0) | 53.9<br>(51.2-57.1) | 57.6<br>(55.0-60.6) | 61.0<br>(58.7-63.4) | 63.8<br>(61.7-66.1) | 67.7<br>(65.6-70.0) | 72.0<br>(69.5-74.2) | 73.7<br>(70.6-76.6) |
| Vietnam                                | 58.6<br>(54.0-63.4) | 62.2<br>(62.2-66.7) | 67.0<br>(65.3-69.3) | 69.3<br>(67.5-71.5) | 71.1<br>(69.5-73.0) | 72.7<br>(70.9-74.9) | 74.1<br>(72.6-76.4) | 75.2<br>(73.7-77.5) | 76.6<br>(75.0-78.3) | 78.1<br>(76.6-79.1) |
| Oceania                                | 58.2<br>(56.4-60.1) | 59.3<br>(57.6-61.1) | 59.9<br>(58.1-61.7) | 60.1<br>(58.4-61.9) | 60.3<br>(58.4-62.0) | 60.8<br>(58.9-62.7) | 61.1<br>(59.0-63.1) | 61.1<br>(58.8-63.1) | 61.9<br>(59.5-64.1) | 63.8<br>(61.4-66.0) |
| American Samoa                         | 70.0<br>(68.7-71.5) | 72.6<br>(70.9-74.2) | 73.2<br>(71.1-75.0) | 73.4<br>(71.7-74.9) | 75.0<br>(73.8-76.4) | 74.3<br>(72.5-75.7) | 74.4<br>(72.8-75.7) | 74.5<br>(72.6-75.9) | 74.7<br>(73.1-76.4) | 74.4<br>(72.0-77.0) |
| Federated States of Micronesia         | 61.7<br>(59.5-64.4) | 62.9<br>(60.6-65.3) | 64.1<br>(61.9-66.3) | 64.9<br>(62.7-67.0) | 65.6<br>(62.7-67.7) | 66.4<br>(64.2-68.6) | 66.8<br>(64.5-69.3) | 67.2<br>(64.6-69.8) | 67.3<br>(64.2-70.0) | 67.6<br>(64.5-70.5) |
| Fiji                                   | 67.0<br>(65.3-68.9) | 67.2<br>(65.4-69.0) | 67.6<br>(65.8-69.6) | 68.7<br>(66.8-70.5) | 68.0<br>(66.9-72.2) | 67.2<br>(64.0-70.6) | 66.8<br>(64.6-69.1) | 67.2<br>(65.2-69.2) | 67.4<br>(64.9-69.6) | 67.7<br>(63.5-71.9) |
| Guam                                   | 71.0<br>(69.7-72.3) | 72.4<br>(71.1-73.8) | 75.2<br>(74.1-76.4) | 76.6<br>(75.2-77.9) | 76.4<br>(75.2-77.7) | 76.4<br>(75.4-77.8) | 77.1<br>(76.1-78.3) | 76.9<br>(75.7-77.9) | 75.7<br>(74.4-77.0) | 76.1<br>(74.3-78.1) |
| Kiribati                               | 57.4<br>(54.1-60.7) | 60.4<br>(57.0-63.7) | 61.4<br>(57.3-64.5) | 60.5<br>(57.3-63.1) | 60.9<br>(59.0-62.7) | 61.8<br>(60.5-63.1) | 63.0<br>(61.5-64.4) | 63.8<br>(61.9-65.7) | 64.4<br>(62.1-66.8) | 65.6<br>(62.4-68.3) |
| Marshall Islands                       | 64.4<br>(60.2-68.0) | 66.5<br>(63.0-69.6) | 68.1<br>(65.4-70.8) | 68.6<br>(66.5-70.7) | 68.0<br>(66.5-69.4) | 67.1<br>(65.6-68.5) | 65.6<br>(63.8-67.2) | 65.2<br>(63.4-67.0) | 65.8<br>(63.5-68.3) | 67.3<br>(64.4-70.1) |
| Northern Mariana Islands               | 70.3<br>(67.1-73.5) | 71.9<br>(68.4-75.2) | 73.1<br>(69.8-76.2) | 73.7<br>(70.6-76.5) | 74.7<br>(72.0-77.5) | 74.7<br>(73.8-78.8) | 77.3<br>(75.0-79.7) | 77.6<br>(75.4-79.8) | 77.6<br>(75.3-79.7) | 77.4<br>(74.9-79.9) |
| Papua New Guinea                       | 55.6<br>(53.2-58.2) | 56.8<br>(54.5-59.3) | 57.1<br>(54.7-59.5) | 57.2<br>(54.9-59.4) | 57.5<br>(55.2-59.8) | 58.4<br>(56.0-60.8) | 58.9<br>(56.1-61.4) | 58.8<br>(56.0-61.4) | 59.9<br>(56.9-62.6) | 62.2<br>(59.4-64.9) |
| Samoa                                  | 67.5<br>(66.2-69.1) | 68.6<br>(67.2-70.1) | 70.8<br>(69.3-72.3) | 71.6<br>(69.8-73.3) | 72.3<br>(70.5-74.3) | 72.7<br>(70.5-74.7) | 73.1<br>(71.1-75.2) | 73.5<br>(71.7-75.5) | 73.5<br>(71.8-75.4) | 74.0<br>(72.0-76.1) |
| Solomon Islands                        | 53.8<br>(53.8-58.9) | 56.8<br>(54.4-59.6) | 60.9<br>(58.3-63.9) | 61.6<br>(59.1-64.1) | 61.8<br>(59.5-64.3) | 62.4<br>(60.1-64.7) | 62.7<br>(60.5-65.0) | 62.1<br>(59.7-64.6) | 62.8<br>(60.2-65.4) | 64.2<br>(61.5-66.9) |
| Tonga                                  | 67.5<br>(65.1-70.0) | 68.1<br>(65.6-70.6) | 68.0<br>(65.4-70.6) | 68.9<br>(66.2-71.6) | 70.1<br>(67.6-72.6) | 71.0<br>(68.2-73.0) | 71.0<br>(69.0-73.2) | 72.2<br>(70.2-74.2) | 72.7<br>(70.9-74.9) | 73.3<br>(70.9-75.6) |
| Vanuatu                                | 59.9<br>(56.0-61.5) | 60.9<br>(58.1-63.5) | 62.7<br>(60.4-65.0) | 63.5<br>(61.3-65.6) | 63.9<br>(61.8-66.0) | 64.1<br>(61.9-66.2) | 64.1<br>(62.0-66.1) | 63.9<br>(61.3-66.1) | 64.7<br>(61.8-67.0) | 65.7<br>(62.8-68.2) |
| North Africa and Middle East           | 57.0<br>(56.1-57.9) | 60.7<br>(60.0-61.3) | 63.5<br>(62.8-64.1) | 65.9<br>(65.2-66.6) | 68.9<br>(68.4-69.4) | 70.1<br>(69.7-70.5) | 71.8<br>(71.4-72.2) | 72.9<br>(72.5-73.4) | 74.3<br>(73.8-74.9) | 74.3<br>(74.9-76.3) |
| North Africa and Middle East           | 44.4<br>(41.2-47.7) | 44.9<br>(42.4-47.7) | 43.6<br>(40.6-46.5) | 43.7<br>(39.5-48.3) | 51.4<br>(49.8-52.9) | 51.2<br>(49.7-52.7) | 51.8<br>(50.5-53.2) | 51.8<br>(52.6-55.6) | 51.8<br>(55.2-58.3) | 59.2<br>(57.5-60.8) |
| Afghanistan                            | 59.1<br>(57.2-60.9) | 60.9<br>(59.2-62.6) | 63.4<br>(62.1-64.6) | 64.4<br>(68.7-70.8) | 69.7<br>(71.3-73.8) | 72.6<br>(72.6-75.1) | 74.6<br>(74.1-76.5) | 75.4<br>(75.2-77.5) | 76.4<br>(76.9-78.2) | 78.4<br>(77.5-79.3) |
| Algeria                                | 66.5<br>(63.1-69.5) | 69.7<br>(66.8-72.7) | 72.9<br>(70.7-75.0) | 73.1<br>(71.4-74.   |                     |                     |                     |                     |                     |                     |

Appendix Table 13C: Estimates of life expectancy at birth by location, females, 1970, 1975, 1980, 1985, 1990, 1995, 2000, 2005, 2010, 2016

| Location                    | 1970                | 1975                | 1980                | 1985                | 1990                | 1995                | 2000                | 2005                | 2010                | 2016                |
|-----------------------------|---------------------|---------------------|---------------------|---------------------|---------------------|---------------------|---------------------|---------------------|---------------------|---------------------|
| Egypt                       | 53.4<br>(51.8-55.0) | 57.1<br>(55.7-58.4) | 61.0<br>(59.6-62.4) | 63.2<br>(62.0-64.2) | 67.3<br>(66.3-68.2) | 70.0<br>(69.1-70.8) | 72.5<br>(71.5-73.3) | 72.8<br>(72.0-73.6) | 73.0<br>(72.2-73.8) | 75.0<br>(73.2-77.0) |
| Iran                        | 58.0<br>(54.5-61.7) | 66.9<br>(64.5-69.6) | 69.6<br>(67.5-71.9) | 71.5<br>(69.4-73.8) | 71.1<br>(68.9-73.4) | 73.7<br>(71.9-75.5) | 74.2<br>(72.5-75.8) | 74.8<br>(72.5-76.9) | 76.5<br>(74.3-79.0) | 78.4<br>(76.8-80.6) |
| Iraq                        | 63.2<br>(61.5-64.6) | 63.5<br>(61.8-65.2) | 64.2<br>(61.1-67.7) | 63.5<br>(60.0-67.4) | 67.6<br>(65.6-69.7) | 66.9<br>(65.4-68.3) | 67.8<br>(66.3-69.1) | 67.4<br>(65.2-69.5) | 69.4<br>(66.8-71.9) | 70.5<br>(67.4-73.5) |
| Jordan                      | 64.2<br>(61.8-66.4) | 67.1<br>(64.8-69.0) | 68.8<br>(66.5-71.1) | 70.3<br>(68.7-72.3) | 72.6<br>(70.9-74.8) | 73.5<br>(71.5-75.7) | 73.6<br>(71.3-76.0) | 73.5<br>(71.1-76.0) | 76.9<br>(74.3-79.6) | 78.0<br>(74.9-81.0) |
| Kuwait                      | 72.0<br>(70.4-73.7) | 72.4<br>(70.8-74.1) | 73.5<br>(72.1-75.2) | 74.9<br>(73.3-76.4) | 76.7<br>(74.8-78.6) | 76.7<br>(75.3-78.1) | 76.6<br>(75.2-78.2) | 77.2<br>(75.7-78.8) | 77.8<br>(76.4-79.1) | 79.5<br>(76.4-82.7) |
| Lebanon                     | 68.0<br>(64.4-71.5) | 64.3<br>(59.2-69.8) | 59.9<br>(52.5-68.4) | 68.7<br>(64.9-72.5) | 71.9<br>(70.1-74.0) | 74.2<br>(72.7-76.3) | 77.0<br>(75.3-78.3) | 78.8<br>(78.0-80.0) | 80.7<br>(79.5-81.9) | 81.4<br>(79.8-83.0) |
| Libya                       | 67.4<br>(65.9-69.1) | 70.6<br>(69.2-72.0) | 73.2<br>(71.9-74.6) | 74.3<br>(73.3-75.7) | 74.7<br>(73.4-75.7) | 75.5<br>(74.0-76.6) | 75.7<br>(74.1-77.0) | 76.7<br>(75.0-77.9) | 77.9<br>(76.6-78.8) | 77.6<br>(76.1-78.7) |
| Morocco                     | 57.6<br>(56.4-58.8) | 60.1<br>(59.0-61.1) | 63.0<br>(61.9-64.1) | 66.5<br>(65.5-67.4) | 68.7<br>(67.6-69.7) | 70.3<br>(69.1-71.4) | 72.3<br>(71.2-73.3) | 73.5<br>(72.2-74.7) | 74.9<br>(73.6-76.3) | 76.4<br>(75.1-77.7) |
| Palestine                   | 64.5<br>(60.6-68.0) | 67.9<br>(64.6-70.9) | 69.9<br>(67.1-72.5) | 71.5<br>(68.9-73.8) | 71.8<br>(69.7-73.7) | 72.9<br>(71.7-74.2) | 73.2<br>(72.5-73.7) | 74.2<br>(73.8-74.6) | 74.0<br>(73.7-74.4) | 73.5<br>(72.8-74.2) |
| Oman                        | 50.7<br>(48.0-53.1) | 56.9<br>(54.6-59.0) | 63.2<br>(61.4-64.9) | 68.6<br>(67.2-70.0) | 71.9<br>(70.5-73.3) | 74.0<br>(72.7-75.6) | 76.2<br>(75.2-77.5) | 78.1<br>(77.3-79.2) | 78.1<br>(79.0-79.2) | 79.9<br>(79.2-80.8) |
| Qatar                       | 69.9<br>(65.1-74.5) | 71.6<br>(67.6-75.7) | 74.4<br>(70.8-77.5) | 74.2<br>(71.8-76.8) | 75.3<br>(73.1-77.8) | 75.3<br>(73.4-77.6) | 76.3<br>(74.4-78.5) | 78.4<br>(76.8-80.1) | 80.8<br>(79.0-83.0) | 81.8<br>(78.9-85.2) |
| Saudi Arabia                | 67.0<br>(64.2-69.8) | 70.8<br>(68.9-72.7) | 72.9<br>(71.2-74.5) | 73.5<br>(72.0-75.0) | 73.5<br>(71.7-74.9) | 73.7<br>(72.6-75.0) | 73.4<br>(72.6-74.2) | 74.6<br>(74.0-75.2) | 76.0<br>(75.4-76.6) | 78.7<br>(77.8-79.6) |
| Sudan                       | 53.8<br>(52.4-55.2) | 54.5<br>(53.1-55.9) | 56.1<br>(54.6-57.4) | 51.9<br>(48.3-55.9) | 59.5<br>(58.3-60.6) | 61.4<br>(60.3-62.6) | 63.9<br>(62.8-64.9) | 66.3<br>(65.4-67.3) | 68.0<br>(67.0-69.0) | 70.3<br>(69.0-71.5) |
| Syria                       | 67.2<br>(66.1-68.3) | 69.8<br>(69.0-70.6) | 71.4<br>(70.6-72.1) | 72.0<br>(71.1-73.0) | 72.8<br>(71.7-73.9) | 73.7<br>(72.9-74.8) | 75.3<br>(74.8-75.8) | 76.8<br>(76.1-77.6) | 78.3<br>(77.6-79.1) | 73.6<br>(69.1-77.7) |
| Tunisia                     | 59.0<br>(57.7-60.2) | 63.8<br>(62.7-64.8) | 67.7<br>(66.6-68.8) | 72.0<br>(70.8-73.1) | 74.1<br>(73.1-75.2) | 75.6<br>(74.4-76.6) | 77.6<br>(76.5-78.8) | 78.6<br>(77.4-80.3) | 79.5<br>(78.2-81.6) | 80.5<br>(78.9-82.7) |
| Turkey                      | 60.9<br>(58.1-63.8) | 64.0<br>(62.0-66.2) | 68.0<br>(66.3-69.6) | 71.4<br>(69.9-72.9) | 73.5<br>(72.4-74.5) | 74.4<br>(73.5-75.3) | 77.6<br>(76.7-78.5) | 80.0<br>(79.0-80.9) | 81.4<br>(80.2-82.5) | 82.3<br>(80.4-84.3) |
| United Arab Emirates        | 66.0<br>(61.7-70.2) | 69.0<br>(64.7-72.8) | 71.7<br>(67.8-75.1) | 73.3<br>(70.0-76.5) | 73.8<br>(71.1-76.7) | 75.0<br>(72.8-77.0) | 76.5<br>(74.8-78.0) | 78.4<br>(77.1-79.2) | 78.4<br>(76.9-79.9) | 78.6<br>(76.2-80.6) |
| Yemen                       | 44.0<br>(42.4-45.7) | 49.9<br>(48.4-51.4) | 54.9<br>(52.9-55.7) | 57.1<br>(55.9-58.4) | 58.8<br>(57.6-60.1) | 60.4<br>(59.2-61.7) | 62.6<br>(61.5-63.9) | 65.1<br>(64.0-66.3) | 67.7<br>(66.6-68.9) | 67.9<br>(66.6-69.2) |
| South Asia                  | 49.5<br>(48.7-50.3) | 52.4<br>(51.6-53.1) | 55.1<br>(54.4-55.7) | 57.4<br>(56.9-58.0) | 59.8<br>(59.2-60.3) | 61.7<br>(61.2-62.2) | 63.7<br>(63.3-64.1) | 65.7<br>(65.3-66.2) | 68.0<br>(67.6-68.5) | 70.6<br>(70.1-71.1) |
| South Asia                  | 46.5<br>(48.7-50.3) | 52.7<br>(51.6-53.1) | 53.7<br>(54.4-55.7) | 55.5<br>(56.9-58.0) | 58.6<br>(59.2-60.3) | 62.5<br>(61.2-62.2) | 66.7<br>(63.3-64.1) | 72.3<br>(65.3-66.2) | 75.9<br>(67.6-68.5) | 75.1<br>(70.1-71.1) |
| Bangladesh                  | 48.3<br>(43.1-50.2) | 50.6<br>(50.6-54.7) | 52.6<br>(52.2-55.3) | 55.6<br>(54.3-56.7) | 59.1<br>(57.3-59.9) | 62.3<br>(61.2-63.6) | 65.9<br>(65.7-67.9) | 70.4<br>(68.7-70.6) | 73.7<br>(71.3-73.2) | 75.9<br>(73.5-76.4) |
| Bhutan                      | 49.5<br>(45.2-51.4) | 52.2<br>(47.8-53.4) | 54.9<br>(49.9-55.1) | 57.3<br>(53.2-57.9) | 59.7<br>(57.1-61.4) | 61.6<br>(60.5-64.3) | 63.4<br>(64.2-67.7) | 65.6<br>(68.8-72.0) | 67.8<br>(71.8-75.4) | 70.3<br>(73.8-77.4) |
| India                       | 49.4<br>(48.5-50.5) | 50.8<br>(51.3-53.0) | 52.5<br>(54.3-55.5) | 54.9<br>(56.7-57.9) | 57.7<br>(59.0-60.3) | 60.8<br>(61.1-62.2) | 64.6<br>(62.9-64.0) | 66.7<br>(65.0-66.2) | 69.1<br>(67.2-68.4) | 71.9<br>(69.6-71.0) |
| Nepal                       | 57.3<br>(48.1-50.7) | 59.0<br>(49.8-52.1) | 60.6<br>(51.5-53.7) | 61.9<br>(53.9-55.9) | 62.8<br>(56.7-65.6) | 61.8<br>(59.8-61.7) | 62.9<br>(63.6-65.6) | 63.9<br>(65.8-67.7) | 66.3<br>(68.2-70.1) | 68.9<br>(71.1-72.8) |
| Pakistan                    | 50.7<br>(55.0-59.3) | 52.3<br>(56.8-60.8) | 53.9<br>(58.8-62.1) | 54.9<br>(60.7-62.9) | 55.4<br>(61.5-63.5) | 55.0<br>(60.8-62.9) | 54.2<br>(61.7-64.1) | 55.8<br>(62.1-64.8) | 59.5<br>(64.6-68.2) | 64.6<br>(66.9-71.2) |
| Sub-Saharan Africa          | 59.2<br>(49.8-51.6) | 61.0<br>(51.6-53.1) | 62.4<br>(53.3-54.4) | 65.1<br>(54.4-55.4) | 67.4<br>(54.9-55.8) | 69.9<br>(54.5-55.4) | 71.6<br>(53.7-54.8) | 73.6<br>(55.3-56.3) | 75.1<br>(59.0-60.1) | 76.5<br>(63.9-65.3) |
| Southern Sub-Saharan Africa | 58.3<br>(57.4-60.9) | 61.5<br>(59.7-62.4) | 64.0<br>(61.4-63.6) | 66.4<br>(64.3-65.8) | 67.6<br>(66.6-68.1) | 69.1<br>(64.5-67.2) | 70.2<br>(54.6-57.5) | 71.2<br>(50.0-52.6) | 72.3<br>(54.1-56.2) | 73.3<br>(63.8-66.0) |
| Botswana                    | 58.4<br>(57.0-59.6) | 59.8<br>(60.4-62.8) | 61.6<br>(62.8-65.2) | 63.0<br>(65.3-67.4) | 64.2<br>(65.6-69.8) | 61.9<br>(53.4-68.7) | 51.8<br>(42.4-56.9) | 45.4<br>(44.0-55.2) | 49.1<br>(54.4-66.4) | 53.7<br>(64.5-75.5) |
| Lesotho                     | 59.5<br>(55.5-61.9) | 60.6<br>(56.5-63.0) | 61.4<br>(58.6-64.7) | 63.6<br>(60.7-65.7) | 64.7<br>(62.3-66.3) | 63.1<br>(59.4-64.9) | 56.2<br>(48.0-55.7) | 54.0<br>(41.7-49.4) | 61.5<br>(45.7-52.0) | 69.3<br>(49.9-88.2) |
| Namibia                     | 59.2<br>(57.2-61.7) | 61.0<br>(58.9-62.3) | 62.3<br>(60.0-62.8) | 64.9<br>(62.3-64.9) | 68.1<br>(63.6-65.9) | 68.5<br>(60.8-65.7) | 68.5<br>(52.3-61.3) | 68.4<br>(50.1-58.1) | 65.8<br>(57.7-65.5) | 65.5<br>(65.5-75.2) |
| South Africa                | 53.5<br>(56.9-61.4) | 57.2<br>(59.2-62.8) | 60.3<br>(60.8-63.8) | 63.0<br>(64.0-65.9) | 65.4<br>(67.2-68.9) | 63.1<br>(67.8-69.6) | 43.7<br>(56.9-59.6) | 50.1<br>(51.0-53.9) | 49.2<br>(54.6-56.9) | 42.2<br>(64.2-66.7) |
| Swaziland                   | 59.4<br>(49.5-57.3) | 61.2<br>(54.3-60.4) | 62.5<br>(57.9-63.1) | 65.0<br>(60.6-65.5) | 64.4<br>(63.4-67.5) | 65.0<br>(59.4-67.2) | 48.6<br>(44.9-55.6) | 46.6<br>(39.9-48.1) | 51.3<br>(45.6-52.9) | 61.9<br>(57.4-68.3) |
| Zimbabwe                    | 50.0<br>(57.3-61.4) | 52.0<br>(59.2-62.9) | 54.9<br>(60.9-64.0) | 55.2<br>(63.8-66.3) | 55.6<br>(62.1-67.2) | 55.9<br>(52.1-62.1) | 55.9<br>(44.6-53.0) | 57.7<br>(43.4-50.2) | 60.8<br>(48.6-54.8) | 64.9<br>(59.2-65.2) |
| Western Sub-Saharan Africa  | 48.8<br>(48.7-51.1) | 51.4<br>(50.9-53.1) | 53.4<br>(53.5-54.9) | 55.7<br>(54.3-56.1) | 57.6<br>(54.7-56.3) | 58.6<br>(54.6-56.4) | 59.7<br>(56.7-58.7) | 61.6<br>(59.8-61.8) | 63.8<br>(59.8-61.8) | 66.3<br>(63.7-65.9) |
| Benin                       | 47.4<br>(44.3-50.4) | 49.5<br>(49.9-52.8) | 51.4<br>(52.2-54.7) | 53.7<br>(54.5-56.8) | 56.1<br>(56.5-58.7) | 52.3<br>(57.4-59.8) | 53.7<br>(60.1-63.0) | 56.3<br>(61.6-63.0) | 59.1<br>(62.3-65.4) | 62.3<br>(64.8-68.1) |
| Burkina Faso                | 44.8<br>(44.6-46.9) | 47.4<br>(46.6-48.3) | 49.6<br>(48.9-50.3) | 51.3<br>(50.6-52.0) | 52.5<br>(51.5-53.2) | 52.3<br>(51.0-53.8) | 53.7<br>(52.5-54.9) | 56.3<br>(55.3-57.3) | 59.1<br>(58.1-60.0) | 62.3<br>(61.6-63.0) |
| Cameroon                    | 52.1<br>(50.6-53.8) | 53.9<br>(52.4-55.5) | 55.8<br>(54.5-57.3) | 58.4<br>(57.1-59.8) | 59.6<br>(58.3-61.1) | 58.0<br>(54.1-58.1) | 55.8<br>(54.1-58.1) | 56.1<br>(54.2-58.4) | 58.6<br>(56.3-61.1) | 62.0<br>(59.3-65.2) |
| Cape Verde                  | 59.8<br>(57.2-62.5) | 63.8<br>(61.6-66.0) | 67.5<br>(66.1-69.0) | 68.6<br>(67.7-69.6) | 71.6<br>(70.5-72.8) | 71.3<br>(69.4-73.6) | 74.3<br>(72.0-76.7) | 76.1<br>(74.3-78.2) | 77.7<br>(76.5-79.2) | 78.5<br>(77.2-80.2) |
| Chad                        | 51.4<br>(49.8-53.1) | 53.0<br>(51.6-54.4) | 53.4<br>(51.5-54.3) | 53.6<br>(52.3-54.8) | 54.4<br>(53.5-55.7) | 54.8<br>(53.5-56.0) | 53.8<br>(52.2-55.4) | 55.2<br>(53.6-57.0) | 57.8<br>(56.2-59.6) | 61.4<br>(59.6-63.2) |
| Cote d'Ivoire               | 53.1<br>(51.8-54.4) | 55.6<br>(54.4-56.8) | 57.7<br>(56.5-58.9) | 58.4<br>(57.3-59.4) | 57.7<br>(56.5-58.8) | 55.9<br>(54.5-57.5) | 55.1<br>(53.4-57.0) | 55.7<br>(54.0-57.5) | 58.3<br>(56.8-60.1) | 62.3<br>(60.5-64.0) |
| The Gambia                  | 56.5<br>(54.3-58.8) | 58.2<br>(56.2-60.4) | 59.9<br>(58.0-62.1) | 61.3<br>(59.4-63.1) | 62.3<br>(60.7-64.0) | 63.3<br>(61.8-64.9) | 64.4<br>(63.0-66.0) | 66.0<br>(64.4-67.8) | 67.3<br>(65.7-69.1) | 69.2<br>(67.6-71.3) |
| Ghana                       | 56.2<br>(54.5-58.1) | 57.6<br>(56.0-59.5) | 58.4<br>(56.7-60.2) | 58.8<br>(57.2-60.4) | 59.8<br>(58.4-61.4) | 60.6<br>(59.1-62.3) | 60.6<br>(58.8-62.7) | 61.6<br>(59.8-63.6) | 63.5<br>(61.9-65.4) | 67.5<br>(66.0-69.7) |
| Guinea                      | 44.9<br>(42.3-47.4) | 45.9<br>(43.8-48.0) | 47.8<br>(46.0-49.6) | 49.5<br>(48.0-51.1) | 51.9<br>(50.5-53.3) | 53.8<br>(52.6-55.0) | 55.5<br>(54.2-56.9) | 57.0<br>(55.6-58.7) | 58.9<br>(57.1-61.0) | 61.6<br>(59.5-64.0) |
| Guinea-Bissau               | 44.5<br>(41.6-47.8) | 48.2<br>(46.0-50.8) | 49.7<br>(47.8-52.0) | 50.4<br>(48.7-52.5) | 51.9<br>(50.3-53.8) | 53.5<br>(52.0-55.1) | 54.7<br>(53.0-56.3) | 55.6<br>(53.6-57.5) | 57.8<br>(55.7-59.7) | 61.4<br>(59.4-63.3) |
| Liberia                     | 49.0<br>(47.5-50.6) | 51.0<br>(49.4-52.7) | 52.4<br>(50.9-53.9) | 53.1<br>(51.7-54.4) | 51.8<br>(50.5-53.1) | 51.6<br>(50.3-52.9) | 54.9<br>(53.5-56.5) | 58.3<br>(57.0-59.8) | 61.0<br>(59.8-62.3) | 64.8<br>(63.6-66.1) |
| Mali                        | 40.2<br>(38.3-42.7) | 42.0<br>(40.4-44.0) | 45.2<br>(43.6-49.9) | 47.6<br>(46.3-49.0) | 49.4<br>(48.2-50.7) | 51.2<br>(50.0-52.6) | 53.4<br>(52.1-54.8) | 57.1<br>(55.7-58.8) | 60.4<br>(58.5-62.4) | 62.7<br>(60.6-65.5) |
| Mauritania                  | 54.9<br>(51.8-58.9) | 58.8<br>(52.7-58.9) | 57.9<br>(55.3-60.5) | 59.3<br>(57.6-61.2) | 60.4<br>(59.1-61.7) | 61.7<br>(60.6-63.1) | 63.3<br>(61.9-64.9) | 65.3<br>(63.7-67.3) | 68.0<br>(65.9-70.3) | 70.2<br>(67.6-73.3) |
| Niger                       | 45.3<br>(43.1-47.5) | 44.8<br>(43.0-46.6) | 45.0<br>(43.5-46.6) | 45.6<br>(44.1-47.1) | 48.1<br>(46.6-49.5) | 49.4<br>(47.9-50.8) | 52.6<br>(51.2-54.0) | 56.4<br>(54.7-57.9) | 59.8<br>(57.6-61.9) | 62.8<br>(60.2-65.5) |
| Nigeria                     | 51.0<br>(48.3-53.4) | 53.6<br>(51.4-55.7) | 55.7<br>(53.8-57.6) | 56.6<br>(54.7-58.4) | 55.8<br>(53.9-57.4) | 55.4<br>(53.6-57.4) | 55.7<br>(53.7-57.9) | 57.6<br>(55.6-59.7) | 61.5<br>(59.6-63.7) | 66.4<br>(64.3-69.1) |
| Sao Tome and Principe       | 60.7<br>(59.5-61.9) | 63.7<br>(62.4-64.9) | 65.0<br>(64.0-66.1) | 64.3<br>(63.1-65.4) | 64.6<br>(63.0-66.1) | 64.3<br>(62.8-66.1) | 65.1<br>(63.9-66.3) | 67.3<br>(66.2-68.4) | 70.0<br>(68.7-71.2) | 72.1<br>(70.5-73.9) |
| Senegal                     | 49.0<br>(47.6-50.4) | 50.8<br>(49.4-52.3) | 53.8<br>(52.6-55.2) | 57.2<br>(56.0-58.4) | 59.1<br>(57.9-60.3) | 59.9<br>(58.8-61.0) | 61.2<br>(60.1-62.4) | 63.3<br>(62.1-64.5) | 65.6<br>(64.6-66.6) | 67.8<br>(66.6-68.8) |
| Sierra Leone                | 47.5<br>(44.5-50.2) | 49.2<br>(46.7-51.6) | 50.2<br>(48.1-52.2) | 51.3<br>(49.6-52.9) | 52.8<br>(51.4-54.1) | 52.8<br>(51.1-53.9) | 52.8<br>(51.5-54.2) | 53.8<br>(52.4-55.2) | 56.0<br>(54.4-57.6) | 60.2<br>(58.4-62.1) |
| Togo                        | 53.7<br>(52.1-55.4) | 55.5<br>(54.0-57.1) | 57.2<br>(55.7-58.8) | 57.9<br>(56.5-59.3) | 58.6<br>(57.5-59.9) | 59.0<br>(57.7-60.4) | 58.3<br>(56.5-60.7) | 58.5<br>(56.4-61.0) | 61.0<br>(59.3-63.1) | 65.1<br>(63.6-66.8) |
| Eastern Sub-Saharan Africa  | 45.7<br>(48.6-50.6) | 46.3<br>(49.8-51.8) | 47.4<br>(51.2-52.9) | 48.7<br>(51.8-53.2) | 49.3<br>(51.8-53.2) | 48.9<br>(51.8-53.0) | 48.9<br>(52.0-53.4) | 48.9<br>(55.1-56.5) | 48.9<br>(59.4-61.0) | 48.9<br>(64.1-66.1) |
| Burundi                     | 52.8<br>(43.3-48.2) | 54.4<br>(44.1-48.4) | 55.8<br>(45.3-49.7) | 57.7<br>(46.7-51.0) | 59.5<br>(47.2-51.6) | 60.7                |                     |                     |                     |                     |

Appendix Table 13C: Estimates of life expectancy at birth by location, females, 1970, 1975, 1980, 1985, 1990, 1995, 2000, 2005, 2010, 2016

| Location                         | 1970                | 1975                | 1980                | 1985                | 1990                | 1995                | 2000                | 2005                | 2010                | 2016                |
|----------------------------------|---------------------|---------------------|---------------------|---------------------|---------------------|---------------------|---------------------|---------------------|---------------------|---------------------|
| Djibouti                         | 62.4<br>(60.4-64.2) | 63.4<br>(61.8-65.0) | 63.7<br>(62.0-65.2) | 63.7<br>(62.2-65.0) | 64.1<br>(62.8-65.2) | 64.0<br>(62.6-65.4) | 63.8<br>(61.7-66.2) | 64.3<br>(61.7-67.1) | 65.8<br>(63.1-68.7) | 68.8<br>(66.1-71.8) |
| Eritrea                          | 47.4<br>(45.4-49.3) | 49.2<br>(47.5-50.8) | 50.6<br>(49.0-52.1) | 51.8<br>(50.4-53.2) | 53.7<br>(52.3-55.2) | 57.5<br>(56.0-59.0) | 59.4<br>(57.8-61.0) | 61.2<br>(59.4-63.1) | 62.4<br>(60.6-64.4) | 64.5<br>(62.8-66.6) |
| Ethiopia                         | 46.0<br>(43.7-48.3) | 46.1<br>(43.8-48.2) | 47.1<br>(45.0-49.2) | 48.1<br>(46.5-49.8) | 48.9<br>(47.6-50.2) | 50.8<br>(49.6-52.1) | 51.9<br>(50.5-53.3) | 56.3<br>(54.7-58.0) | 61.9<br>(60.0-64.0) | 66.5<br>(64.2-68.9) |
| Kenya                            | 58.2<br>(57.5-59.0) | 60.1<br>(59.4-60.9) | 62.0<br>(61.3-62.7) | 63.1<br>(62.4-63.8) | 62.6<br>(62.0-63.3) | 58.9<br>(58.1-59.7) | 56.7<br>(55.9-57.5) | 58.8<br>(58.1-59.5) | 64.3<br>(63.5-65.0) | 69.0<br>(68.2-69.9) |
| Madagascar                       | 51.1<br>(49.5-52.9) | 53.8<br>(52.0-55.6) | 55.9<br>(54.2-57.8) | 55.1<br>(53.6-56.7) | 56.8<br>(55.4-58.2) | 57.8<br>(56.5-59.2) | 59.3<br>(57.8-60.8) | 61.0<br>(59.3-62.9) | 61.9<br>(59.7-64.8) | 63.9<br>(60.8-67.8) |
| Malawi                           | 44.3<br>(41.9-46.6) | 47.4<br>(45.5-49.4) | 50.4<br>(48.8-52.1) | 51.1<br>(49.4-52.6) | 49.9<br>(48.1-51.9) | 47.3<br>(44.5-50.2) | 45.9<br>(42.8-49.6) | 48.8<br>(45.7-52.4) | 54.9<br>(52.0-58.1) | 62.6<br>(59.8-65.9) |
| Mozambique                       | 48.9<br>(46.8-51.0) | 50.7<br>(49.0-52.3) | 51.4<br>(50.1-52.8) | 47.4<br>(45.4-49.6) | 52.8<br>(51.7-53.9) | 53.4<br>(51.7-55.0) | 53.6<br>(51.1-56.3) | 54.6<br>(51.5-57.8) | 56.8<br>(53.9-59.8) | 62.9<br>(60.4-65.4) |
| Rwanda                           | 47.5<br>(45.3-49.8) | 48.2<br>(46.2-50.4) | 50.6<br>(48.6-52.8) | 53.1<br>(51.4-54.9) | 50.8<br>(49.2-52.3) | 47.4<br>(45.7-49.3) | 51.2<br>(49.5-53.1) | 59.2<br>(57.3-61.1) | 66.2<br>(64.3-68.3) | 69.3<br>(67.2-71.5) |
| Somalia                          | 51.4<br>(49.2-53.4) | 49.6<br>(47.4-51.7) | 52.2<br>(50.3-53.7) | 51.4<br>(49.6-52.9) | 51.7<br>(50.1-53.4) | 52.1<br>(50.6-53.8) | 52.6<br>(51.0-54.2) | 54.3<br>(52.6-56.1) | 53.8<br>(51.8-55.8) | 57.7<br>(55.8-59.4) |
| South Sudan                      | 50.6<br>(46.0-54.7) | 51.8<br>(47.8-55.4) | 52.7<br>(49.7-55.8) | 52.9<br>(50.4-55.4) | 53.3<br>(51.2-55.6) | 54.7<br>(52.7-57.1) | 55.8<br>(53.5-58.5) | 57.6<br>(54.9-60.8) | 59.1<br>(56.2-62.3) | 60.7<br>(57.9-63.9) |
| Tanzania                         | 53.0<br>(51.3-54.6) | 55.0<br>(53.4-56.6) | 56.8<br>(55.2-58.3) | 57.2<br>(55.7-58.6) | 56.0<br>(54.8-57.3) | 54.0<br>(52.2-56.0) | 53.7<br>(51.7-56.2) | 56.0<br>(54.0-58.7) | 60.3<br>(58.4-63.0) | 66.0<br>(64.3-68.3) |
| Uganda                           | 51.8<br>(50.6-53.2) | 52.8<br>(51.6-54.2) | 51.7<br>(50.2-53.3) | 52.5<br>(50.9-53.8) | 52.1<br>(50.4-53.4) | 49.9<br>(47.6-52.3) | 51.1<br>(49.2-53.0) | 54.7<br>(53.2-56.3) | 58.6<br>(56.8-60.6) | 64.7<br>(62.9-67.0) |
| Zambia                           | 55.5<br>(51.4-59.6) | 57.5<br>(54.0-61.0) | 57.6<br>(54.8-60.3) | 55.9<br>(53.8-58.0) | 52.3<br>(50.4-54.6) | 47.1<br>(44.4-49.8) | 45.0<br>(42.3-47.9) | 47.4<br>(44.7-50.6) | 54.0<br>(51.3-56.9) | 61.9<br>(58.2-66.8) |
| Central Sub-Saharan Africa       | 50.9<br>(48.2-53.3) | 52.1<br>(49.9-54.4) | 53.2<br>(51.5-54.9) | 54.7<br>(53.4-56.0) | 54.4<br>(53.3-55.5) | 54.0<br>(52.8-55.2) | 54.1<br>(52.9-55.3) | 55.9<br>(54.8-57.1) | 58.5<br>(57.3-59.7) | 62.8<br>(61.2-64.4) |
| Angola                           | 51.7<br>(47.8-55.9) | 52.5<br>(49.0-56.3) | 52.7<br>(49.8-56.1) | 52.9<br>(50.3-56.0) | 52.2<br>(49.6-55.2) | 53.1<br>(50.5-56.3) | 54.0<br>(51.3-57.1) | 56.7<br>(53.8-59.6) | 60.4<br>(57.3-63.5) | 65.4<br>(61.9-68.7) |
| Central African Republic         | 49.9<br>(47.0-53.2) | 50.3<br>(47.4-53.2) | 51.8<br>(49.3-54.3) | 52.7<br>(50.6-55.0) | 51.0<br>(48.8-53.3) | 49.0<br>(46.3-51.8) | 46.9<br>(43.8-50.3) | 47.1<br>(43.9-50.7) | 49.6<br>(46.1-53.4) | 52.6<br>(48.8-56.6) |
| Congo                            | 48.6<br>(45.2-52.1) | 50.9<br>(47.6-54.1) | 53.2<br>(50.1-56.4) | 55.9<br>(53.6-58.6) | 56.0<br>(53.8-58.1) | 54.2<br>(52.4-56.0) | 53.3<br>(51.6-55.3) | 55.9<br>(54.0-57.8) | 59.3<br>(57.2-61.8) | 62.4<br>(59.6-65.6) |
| Democratic Republic of the Congo | 50.9<br>(47.8-53.9) | 52.3<br>(49.5-55.0) | 53.4<br>(51.1-55.6) | 55.3<br>(53.6-56.9) | 55.3<br>(53.7-56.8) | 54.6<br>(53.0-56.2) | 54.8<br>(53.2-56.4) | 56.4<br>(54.9-57.9) | 58.4<br>(56.9-60.0) | 62.7<br>(60.8-64.5) |
| Equatorial Guinea                | 45.8<br>(41.9-49.9) | 47.7<br>(44.6-51.1) | 47.7<br>(47.7-53.3) | 51.3<br>(48.6-54.2) | 49.8<br>(47.2-52.8) | 49.2<br>(46.3-52.3) | 49.2<br>(51.9-59.2) | 55.2<br>(54.1-64.1) | 58.7<br>(56.7-66.1) | 61.2<br>(62.3-71.4) |
| Gabon                            | 55.3<br>(52.4-58.8) | 58.5<br>(55.8-61.7) | 61.2<br>(59.1-64.1) | 62.9<br>(60.9-65.2) | 62.9<br>(61.2-64.5) | 62.9<br>(61.3-64.3) | 60.8<br>(59.0-62.5) | 60.8<br>(59.2-62.8) | 64.1<br>(62.0-66.3) | 68.3<br>(65.9-71.1) |

Appendix Table 14A. Estimates of life expectancy at age 65 by location, both sexes, 1970, 1975, 1980, 1985, 1990, 1995, 2000, 2005, 2010, 2016

| Location                  | 1970                | 1975                | 1980                | 1985                | 1990                | 1995                | 2000                | 2005                | 2010                | 2016                |
|---------------------------|---------------------|---------------------|---------------------|---------------------|---------------------|---------------------|---------------------|---------------------|---------------------|---------------------|
| Global                    | 13.6<br>(13.5-13.6) | 13.9<br>(13.9-14.0) | 14.2<br>(14.1-14.2) | 14.4<br>(14.4-14.5) | 14.7<br>(14.7-14.8) | 14.9<br>(14.8-14.9) | 15.3<br>(15.2-15.3) | 15.8<br>(15.8-15.9) | 16.6<br>(16.5-16.6) | 17.2<br>(17.1-17.3) |
| High SDI                  | 14.5<br>(14.4-14.5) | 15.0<br>(15.0-15.1) | 15.7<br>(15.7-15.8) | 16.2<br>(16.2-16.3) | 16.9<br>(16.8-16.9) | 17.4<br>(17.4-17.5) | 18.1<br>(18.1-18.1) | 18.9<br>(18.9-19.0) | 19.7<br>(19.7-19.8) | 20.2<br>(20.0-20.2) |
| High-middle SDI           | 14.4<br>(14.5-14.6) | 14.6<br>(14.5-14.8) | 14.6<br>(14.5-14.8) | 14.8<br>(14.7-15.0) | 15.1<br>(14.9-15.3) | 14.7<br>(14.5-14.9) | 15.2<br>(15.0-15.3) | 15.7<br>(15.5-15.8) | 16.8<br>(16.6-16.9) | 17.7<br>(17.1-18.1) |
| Middle SDI                | 13.3<br>(13.2-13.4) | 13.6<br>(13.5-13.8) | 13.6<br>(13.5-13.7) | 13.8<br>(13.7-13.9) | 13.9<br>(13.8-14.0) | 14.2<br>(14.1-14.3) | 14.6<br>(14.5-14.6) | 15.2<br>(15.1-15.2) | 15.9<br>(15.8-16.0) | 16.7<br>(16.6-16.8) |
| Low-middle SDI            | 11.4<br>(11.2-11.5) | 11.7<br>(11.6-11.8) | 12.1<br>(12.0-12.2) | 12.4<br>(12.2-12.5) | 12.6<br>(12.5-12.7) | 12.8<br>(12.7-12.9) | 13.1<br>(13.0-13.2) | 13.6<br>(13.5-13.7) | 14.1<br>(13.9-14.2) | 14.6<br>(14.5-14.8) |
| Low SDI                   | 11.1<br>(10.9-11.3) | 11.3<br>(11.1-11.4) | 11.4<br>(11.3-11.6) | 11.6<br>(11.4-11.7) | 11.7<br>(11.5-11.8) | 11.7<br>(11.7-12.1) | 11.9<br>(12.1-12.5) | 12.3<br>(12.4-12.9) | 12.7<br>(12.4-12.9) | 13.3<br>(13.1-13.5) |
| High-income               | 14.6<br>(14.5-14.6) | 15.1<br>(15.1-15.2) | 15.9<br>(15.8-15.9) | 16.4<br>(16.3-16.4) | 17.1<br>(17.0-17.1) | 17.6<br>(17.6-17.7) | 18.3<br>(18.2-18.3) | 19.1<br>(19.1-19.1) | 19.8<br>(19.8-19.9) | 20.2<br>(20.2-20.3) |
| High-income North America | 15.1<br>(15.0-15.1) | 15.9<br>(15.8-15.9) | 16.6<br>(16.5-16.6) | 16.8<br>(16.8-16.9) | 17.3<br>(17.3-17.4) | 17.5<br>(17.5-17.6) | 17.9<br>(17.9-17.9) | 18.6<br>(18.6-18.7) | 19.4<br>(19.4-19.5) | 19.6<br>(19.4-19.7) |
| Canada                    | 15.6<br>(15.5-15.8) | 16.0<br>(15.9-16.2) | 16.8<br>(16.6-16.9) | 17.2<br>(17.1-17.4) | 17.7<br>(17.6-17.9) | 18.0<br>(18.5-18.8) | 18.6<br>(19.3-19.6) | 19.4<br>(20.1-20.4) | 20.3<br>(20.4-20.9) | 20.6<br>(20.4-20.9) |
| Greenland                 | 11.0<br>(10.6-11.3) | 10.1<br>(9.8-10.5)  | 10.1<br>(9.8-10.5)  | 9.8<br>(9.5-10.1)   | 10.1<br>(9.8-10.5)  | 10.5<br>(10.2-10.9) | 10.8<br>(10.4-11.1) | 10.9<br>(10.6-11.3) | 12.1<br>(11.6-12.6) | 12.9<br>(11.9-12.9) |
| United States             | 15.1<br>(15.0-15.1) | 15.8<br>(15.8-15.9) | 16.5<br>(16.5-16.6) | 16.8<br>(16.8-16.9) | 17.3<br>(17.2-17.3) | 17.5<br>(17.4-17.5) | 17.8<br>(17.8-17.9) | 18.5<br>(18.5-18.6) | 19.3<br>(19.3-19.4) | 19.4<br>(19.3-19.5) |
| Australasia               | 14.2<br>(14.1-14.3) | 15.0<br>(14.9-15.1) | 15.8<br>(15.7-15.9) | 16.4<br>(16.2-16.5) | 17.2<br>(17.0-17.3) | 17.9<br>(17.7-18.0) | 18.9<br>(18.8-19.0) | 19.8<br>(19.7-19.9) | 20.4<br>(20.3-20.6) | 20.8<br>(20.4-21.1) |
| Australia                 | 14.2<br>(14.1-14.3) | 15.1<br>(14.9-15.2) | 16.0<br>(15.9-16.1) | 16.5<br>(16.4-16.6) | 17.2<br>(17.1-17.4) | 18.0<br>(17.8-18.1) | 19.0<br>(18.8-19.1) | 19.9<br>(19.8-20.0) | 20.5<br>(20.4-20.7) | 20.9<br>(20.5-21.2) |
| New Zealand               | 14.4<br>(14.3-14.6) | 14.8<br>(14.7-15.0) | 15.2<br>(15.1-15.4) | 15.7<br>(15.6-15.9) | 16.7<br>(16.5-16.8) | 17.4<br>(17.2-17.6) | 18.3<br>(18.2-18.5) | 19.2<br>(19.0-19.3) | 19.9<br>(19.8-20.1) | 20.2<br>(19.6-20.8) |
| High-income Asia Pacific  | 14.0<br>(13.7-14.3) | 14.8<br>(14.6-15.0) | 15.9<br>(15.8-16.0) | 16.9<br>(16.8-17.0) | 17.8<br>(17.7-17.9) | 18.6<br>(18.4-18.7) | 19.5<br>(19.4-19.6) | 20.4<br>(20.3-20.5) | 21.1<br>(21.0-21.2) | 21.7<br>(21.3-22.0) |
| Brunei                    | 13.7<br>(13.1-14.5) | 14.5<br>(13.8-15.2) | 13.9<br>(13.2-15.2) | 14.9<br>(14.5-15.2) | 15.6<br>(15.2-15.9) | 16.1<br>(15.7-16.5) | 16.9<br>(16.6-17.2) | 17.1<br>(16.9-17.4) | 17.3<br>(17.0-17.6) | 17.3<br>(16.7-18.3) |
| Japan                     | 14.2<br>(14.0-14.4) | 15.2<br>(15.1-15.4) | 16.3<br>(16.3-16.4) | 17.4<br>(17.4-17.5) | 18.3<br>(18.3-18.3) | 19.0<br>(19.0-19.1) | 20.0<br>(20.0-20.0) | 20.8<br>(20.8-20.8) | 21.4<br>(21.4-21.4) | 22.0<br>(21.9-22.2) |
| Singapore                 | 12.6<br>(12.0-13.2) | 13.2<br>(12.0-13.8) | 13.2<br>(13.2-14.5) | 14.7<br>(14.1-15.6) | 15.2<br>(15.5-16.9) | 15.7<br>(16.4-17.8) | 16.2<br>(17.7-19.3) | 16.5<br>(18.9-20.3) | 16.7<br>(20.2-21.7) | 16.7<br>(20.3-22.9) |
| South Korea               | 12.7<br>(11.1-14.6) | 12.4<br>(11.3-13.5) | 13.3<br>(12.8-13.9) | 14.1<br>(13.4-14.7) | 14.8<br>(14.3-15.5) | 15.8<br>(15.1-16.4) | 16.7<br>(16.2-17.3) | 17.1<br>(17.5-18.7) | 18.1<br>(18.8-20.0) | 19.8<br>(18.1-21.6) |
| Western Europe            | 14.4<br>(14.3-14.5) | 14.8<br>(14.7-14.9) | 15.5<br>(15.4-15.6) | 16.1<br>(16.0-16.2) | 16.8<br>(16.7-16.9) | 17.4<br>(17.4-17.5) | 18.2<br>(18.1-18.2) | 19.0<br>(18.9-19.1) | 19.8<br>(19.7-19.8) | 20.2<br>(20.1-20.4) |
| Andorra                   | 17.6<br>(15.7-19.4) | 17.9<br>(16.4-19.6) | 18.5<br>(17.3-19.8) | 18.7<br>(17.5-20.0) | 19.0<br>(17.9-20.1) | 19.5<br>(18.3-20.6) | 20.5<br>(19.4-21.4) | 20.9<br>(20.0-21.7) | 21.0<br>(20.0-21.8) | 20.8<br>(19.7-21.9) |
| Austria                   | 13.6<br>(13.5-13.7) | 14.2<br>(14.1-14.3) | 14.8<br>(14.7-15.0) | 15.6<br>(15.5-15.7) | 16.6<br>(16.4-16.8) | 17.2<br>(17.0-17.4) | 17.8<br>(17.5-18.0) | 18.6<br>(18.5-18.9) | 19.5<br>(19.1-19.5) | 20.1<br>(19.2-20.4) |
| Belgium                   | 13.8<br>(13.6-14.0) | 14.2<br>(14.1-14.4) | 14.9<br>(14.8-15.1) | 15.6<br>(15.4-15.8) | 16.6<br>(16.4-16.8) | 17.2<br>(17.0-17.4) | 17.8<br>(17.5-18.0) | 18.6<br>(18.5-18.9) | 19.3<br>(19.1-19.5) | 19.8<br>(19.2-20.4) |
| Cyprus                    | 12.9<br>(12.7-13.2) | 12.6<br>(12.3-12.9) | 13.3<br>(13.0-13.5) | 14.2<br>(14.0-14.4) | 14.9<br>(14.6-15.1) | 15.7<br>(15.4-15.9) | 16.6<br>(16.4-16.8) | 17.5<br>(17.2-17.7) | 18.5<br>(18.3-18.8) | 18.8<br>(18.5-19.2) |
| Denmark                   | 15.2<br>(14.9-15.5) | 15.6<br>(15.3-15.9) | 15.8<br>(15.4-16.1) | 16.1<br>(15.7-16.4) | 16.2<br>(15.9-16.6) | 16.2<br>(15.8-16.6) | 16.9<br>(16.5-17.3) | 17.6<br>(17.2-18.0) | 18.5<br>(18.2-18.9) | 19.4<br>(18.8-20.2) |
| Finland                   | 13.2<br>(13.1-13.4) | 14.2<br>(14.0-14.4) | 15.1<br>(15.0-15.3) | 15.7<br>(15.5-15.8) | 16.1<br>(15.9-16.3) | 17.0<br>(16.8-17.1) | 17.8<br>(17.6-17.9) | 18.8<br>(18.7-19.0) | 19.4<br>(19.3-19.6) | 20.3<br>(19.9-20.8) |
| France                    | 15.2<br>(15.1-15.3) | 15.7<br>(15.5-15.8) | 16.5<br>(16.3-16.6) | 17.2<br>(17.0-17.3) | 18.2<br>(18.0-18.3) | 18.7<br>(18.6-18.9) | 19.2<br>(19.1-19.4) | 20.1<br>(19.9-20.2) | 20.9<br>(20.7-21.0) | 21.4<br>(21.1-21.7) |
| Germany                   | 13.7<br>(13.4-13.9) | 14.1<br>(13.9-14.4) | 14.9<br>(14.6-15.1) | 15.5<br>(15.2-15.8) | 16.3<br>(16.0-16.5) | 17.0<br>(16.6-17.2) | 17.7<br>(17.5-18.0) | 18.5<br>(18.3-18.8) | 19.1<br>(18.9-19.4) | 19.6<br>(19.1-20.1) |
| Greece                    | 15.8<br>(15.7-16.0) | 16.3<br>(16.1-16.4) | 18.3<br>(18.1-18.5) | 16.7<br>(16.6-16.9) | 16.9<br>(16.7-17.0) | 17.4<br>(17.3-17.6) | 18.0<br>(17.8-18.1) | 18.7<br>(18.6-18.9) | 19.4<br>(19.2-19.5) | 19.7<br>(19.3-20.2) |
| Iceland                   | 15.9<br>(15.7-16.2) | 16.7<br>(16.5-17.0) | 17.4<br>(17.1-17.7) | 17.5<br>(17.2-17.7) | 18.0<br>(17.4-18.0) | 18.7<br>(17.7-18.3) | 19.5<br>(18.4-19.0) | 20.2<br>(19.2-19.8) | 20.5<br>(19.7-20.3) | 20.5<br>(19.7-20.7) |
| Ireland                   | 13.7<br>(13.5-14.0) | 13.9<br>(13.6-14.1) | 14.1<br>(13.9-14.4) | 14.6<br>(14.3-14.9) | 15.2<br>(14.9-15.5) | 15.7<br>(15.4-15.9) | 16.4<br>(16.1-16.7) | 17.0<br>(17.1-18.3) | 17.9<br>(18.9-19.4) | 20.0<br>(18.8-20.4) |
| Israel                    | 13.8<br>(13.2-14.4) | 14.4<br>(13.9-14.9) | 14.9<br>(14.3-15.5) | 15.3<br>(14.7-15.8) | 16.0<br>(15.4-16.5) | 16.7<br>(16.1-17.3) | 17.9<br>(17.3-18.6) | 18.7<br>(18.1-19.3) | 19.7<br>(19.4-20.5) | 20.4<br>(19.2-21.4) |
| Italy                     | 14.7<br>(14.6-14.8) | 15.0<br>(14.8-15.1) | 15.6<br>(15.4-15.7) | 16.3<br>(16.1-16.4) | 17.2<br>(17.1-17.3) | 17.9<br>(17.7-18.0) | 18.7<br>(18.6-18.8) | 19.5<br>(19.4-19.6) | 20.1<br>(19.9-20.2) | 20.4<br>(20.0-20.8) |
| Luxembourg                | 13.5<br>(13.3-13.7) | 13.9<br>(13.7-14.1) | 14.6<br>(14.4-14.8) | 15.3<br>(15.1-15.5) | 16.2<br>(15.9-16.4) | 17.1<br>(16.9-17.4) | 18.1<br>(17.9-18.3) | 19.1<br>(18.8-19.3) | 19.9<br>(19.7-20.1) | 20.8<br>(19.7-20.9) |
| Malta                     | 12.4<br>(11.9-12.9) | 12.7<br>(12.3-13.2) | 13.0<br>(12.5-13.4) | 14.2<br>(13.7-14.7) | 15.5<br>(15.0-16.0) | 16.4<br>(16.1-17.1) | 17.6<br>(17.5-18.6) | 18.0<br>(18.5-19.4) | 19.0<br>(18.5-19.4) | 19.8<br>(17.8-20.8) |
| Netherlands               | 15.1<br>(14.9-15.4) | 15.6<br>(15.4-15.8) | 16.3<br>(16.0-16.5) | 16.5<br>(16.3-16.8) | 16.9<br>(16.7-17.2) | 17.1<br>(16.9-17.3) | 17.4<br>(17.2-17.7) | 18.4<br>(18.1-18.6) | 19.3<br>(19.0-19.5) | 19.8<br>(19.3-20.3) |
| Norway                    | 15.3<br>(15.1-15.5) | 15.8<br>(15.6-16.0) | 16.3<br>(16.0-16.5) | 16.6<br>(16.3-16.8) | 16.9<br>(16.7-17.2) | 17.4<br>(17.1-17.6) | 18.0<br>(17.8-18.2) | 19.0<br>(19.3-19.8) | 19.6<br>(19.6-20.8) | 20.2<br>(19.6-20.8) |
| Portugal                  | 13.7<br>(13.6-13.9) | 14.3<br>(14.1-14.5) | 14.9<br>(14.8-15.1) | 15.6<br>(15.4-15.8) | 16.1<br>(15.9-16.2) | 16.6<br>(16.4-16.8) | 17.3<br>(17.1-17.4) | 18.2<br>(18.1-18.4) | 19.2<br>(19.0-19.3) | 19.8<br>(19.5-20.2) |
| Spain                     | 14.8<br>(14.7-14.9) | 15.3<br>(15.2-15.4) | 16.4<br>(16.3-16.5) | 16.9<br>(16.8-17.0) | 17.6<br>(17.5-17.7) | 18.2<br>(18.1-18.3) | 18.8<br>(18.7-18.9) | 19.5<br>(19.4-19.6) | 20.5<br>(20.4-20.6) | 21.1<br>(20.8-21.4) |
| Sweden                    | 15.5<br>(15.2-15.8) | 15.7<br>(15.5-16.0) | 16.2<br>(16.0-16.4) | 16.8<br>(16.6-17.0) | 17.3<br>(17.1-17.5) | 17.9<br>(17.8-18.1) | 18.4<br>(18.3-18.6) | 19.0<br>(18.8-19.2) | 19.7<br>(19.5-19.9) | 20.1<br>(19.4-20.7) |
| Stockholm                 | 15.3<br>(14.1-16.6) | 15.7<br>(14.8-16.6) | 16.4<br>(16.1-16.8) | 17.0<br>(16.7-17.3) | 17.3<br>(17.0-17.6) | 18.0<br>(17.7-18.3) | 18.5<br>(18.2-18.7) | 19.2<br>(18.9-19.5) | 19.9<br>(19.6-20.2) | 20.2<br>(18.9-21.3) |
| Sweden except Stockholm   | 15.5<br>(15.2-15.8) | 15.7<br>(15.5-16.0) | 16.1<br>(15.9-16.3) | 16.7<br>(16.5-16.9) | 17.3<br>(17.1-17.5) | 17.9<br>(17.7-18.1) | 18.4<br>(18.2-18.6) | 19.0<br>(18.8-19.2) | 19.7<br>(19.5-19.9) | 20.0<br>(19.3-20.8) |
| Switzerland               | 14.9<br>(14.5-15.2) | 15.8<br>(15.5-16.2) | 16.4<br>(16.0-16.8) | 17.2<br>(16.8-17.6) | 17.7<br>(17.3-18.0) | 18.3<br>(17.9-18.6) | 19.1<br>(18.7-19.4) | 19.9<br>(19.6-20.2) | 20.5<br>(20.2-20.9) | 21.1<br>(19.8-22.4) |
| United Kingdom            | 14.3<br>(14.2-14.4) | 14.5<br>(14.5-14.6) | 15.0<br>(15.0-15.1) | 15.4<br>(15.4-15.5) | 16.1<br>(16.0-16.1) | 16.6<br>(16.5-16.6) | 17.4<br>(17.3-17.5) | 18.3<br>(18.3-18.4) | 19.3<br>(19.3-19.4) | 19.6<br>(19.5-19.7) |
| England                   | 14.4<br>(14.3-14.5) | 14.6<br>(14.6-14.7) | 15.1<br>(15.1-15.2) | 15.5<br>(15.5-15.6) | 16.2<br>(16.2-16.3) | 16.7<br>(16.6-16.7) | 17.5<br>(17.5-17.6) | 18.5<br>(18.4-18.5) | 19.5<br>(19.5-19.6) | 19.8<br>(19.7-19.9) |
| East Midlands             | 14.2<br>(13.8-14.5) | 14.5<br>(14.2-14.8) | 15.0<br>(14.8-15.3) | 15.5<br>(15.3-15.6) | 16.1<br>(16.0-16.3) | 16.6<br>(16.4-16.7) | 17.5<br>(17.3-17.6) | 18.3<br>(18.2-18.5) | 19.3<br>(19.1-19.5) | 19.6<br>(19.4-19.9) |
| East of England           | 14.7<br>(14.3-15.0) | 15.0<br>(14.7-15.3) | 15.5<br>(15.3-15.7) | 15.9<br>(15.8-16.1) | 16.7<br>(16.5-16.8) | 17.2<br>(17.0-17.3) | 17.9<br>(17.8-18.1) | 19.0<br>(18.8-19.1) | 20.0<br>(19.8-20.1) | 20.2<br>(19.9-20.5) |
| Greater London            | 14.9<br>(14.7-15.1) | 15.1<br>(14.9-15.2) | 15.5<br>(15.3-15.6) | 15.8<br>(15.7-15.9) | 16.5<br>(16.4-16.6) | 16.9<br>(16.8-17.0) | 17.6<br>(17.5-17.7) | 18.6<br>(18.5-18.7) | 19.8<br>(19.7-19.9) | 20.2<br>(20.0-20.3) |
| North East England        | 13.3<br>(13.0-13.6) | 13.7<br>(13.4-13.9) | 14.2<br>(14.0-14.4) | 14.5<br>(14.3-14.7) | 15.1<br>(15.0-15.3) | 15.5<br>(15.3-15.6) | 16.5<br>(16.4-16.7) | 17.4<br>(17.3-17.6) | 18.5<br>(18.4-18.7) | 18.9<br>(18.6-19.1) |
| North West England        | 13.7<br>(13.8-13.9) | 14.0<br>(13.8-14.2) | 14.4<br>(14.3-14.6) | 14.9<br>(14.7-15.0) | 15.4<br>(15.3-15.5) | 15.9<br>(15.8-16.0) | 16.8<br>(16.7-16.9) | 17.7<br>(17.6-17.8) | 18.7<br>(18.6-18.8) | 19.7<br>(18.9-19.2) |
| South East England        | 15.0<br>(14.7-15.3) | 15.3<br>(15.0-15.5) | 15.8<br>(15.6-15.9) | 16.1<br>(16.0-16.3) | 16.8<br>(16.7-17.0) | 17.3<br>(17.1-17.4) | 18.1<br>(18.0-18.2) | 19.1<br>(19.0-19.2) | 20.1<br>(20.0-20.2) | 20.3<br>(20.1-20.5) |
| South West England        | 15.0<br>(14.8-15.3) | 15.3<br>(15.1-15.6) | 15.8<br>(15.6-16.0) | 16.3<br>(16.2-16.4) | 17.0<br>(16.8-17.1) | 17.5<br>(17.4-17.6) | 18.2<br>(18.1-18.4) | 19.2<br>(19.1-19.3) | 20.2<br>(20.0-20.2) | 20.3<br>(20.1-20.5) |
| West Midlands             | 14.0<br>(13.7-14.3) | 14.3<br>(14.0-14.6) | 14.7<br>(14.5-14.9) | 15.2<br>(15.0-15.3) | 15.8<br>(15.7-16.0) | 16.3<br>(16.2-16.5) | 17.2<br>(17.1-17.4) | 18.1<br>(18.1-18.3) | 19.0<br>(19.2-19.5) | 19.3<br>(19.4-19.8) |
| Yorkshire and the Humber  | 13.8<br>(13.7-14.2) | 14.1<br>(14.0-14.4) | 14.5<br>(14.5-14.9) | 14.9<br>(15.0-15.3) | 15.6<br>(15.7-15.9) | 16.2<br>(16.2-16.4) | 17.1<br>(17.0-17.3) | 18.2<br>(18.0-18.3) | 19.1<br>(18.9-19.1) | 19.2<br>(19.1-19.5) |
| Northern Ireland          | 13.7<br>(13.5-14.2) | 13.9<br>(13.7-14.4) | 14.4<br>(14.2-14.8) | 14.6<br>(14.5-15.4) | 15.1<br>(15.2-16.1) | 15.6                |                     |                     |                     |                     |

Appendix Table 14A. Estimates of life expectancy at age 65 by location, both sexes, 1970, 1975, 1980, 1985, 1990, 1995, 2000, 2005, 2010, 2016

| Location                                         | 1970                | 1975                | 1980                | 1985                | 1990                | 1995                | 2000                | 2005                | 2010                | 2016                |
|--------------------------------------------------|---------------------|---------------------|---------------------|---------------------|---------------------|---------------------|---------------------|---------------------|---------------------|---------------------|
| Wales                                            | 13.9<br>(13.1-14.9) | 14.2<br>(13.4-15.1) | 14.8<br>(14.2-15.4) | 15.4<br>(14.9-15.8) | 15.9<br>(15.5-16.3) | 16.3<br>(15.9-16.7) | 17.1<br>(16.7-17.6) | 18.1<br>(17.7-18.5) | 18.9<br>(18.5-19.3) | 19.1<br>(18.4-19.8) |
| Southern Latin America                           | 14.4<br>(14.3-14.7) | 15.0<br>(14.7-15.3) | 15.3<br>(15.1-15.4) | 15.6<br>(15.4-15.8) | 16.0<br>(15.8-16.2) | 16.6<br>(16.4-16.8) | 17.0<br>(16.8-17.2) | 17.4<br>(17.2-17.6) | 17.8<br>(17.6-18.0) | 18.4<br>(17.9-18.9) |
| Argentina                                        | 14.3<br>(14.0-14.5) | 14.8<br>(14.4-15.2) | 15.1<br>(14.9-15.4) | 15.6<br>(15.4-15.8) | 16.0<br>(15.7-16.2) | 16.5<br>(16.3-16.7) | 16.7<br>(16.5-16.9) | 17.0<br>(16.8-17.2) | 17.4<br>(17.1-17.6) | 17.8<br>(17.4-18.3) |
| Chile                                            | 14.9<br>(14.6-15.3) | 15.7<br>(15.3-16.0) | 15.7<br>(15.4-16.1) | 15.8<br>(15.4-16.1) | 16.3<br>(15.9-16.7) | 17.0<br>(16.6-17.4) | 18.0<br>(17.6-18.3) | 18.7<br>(18.3-19.0) | 19.3<br>(19.0-19.7) | 19.9<br>(18.4-21.5) |
| Uruguay                                          | 14.7<br>(14.5-14.9) | 14.9<br>(14.8-15.1) | 15.2<br>(15.0-15.4) | 15.5<br>(15.3-15.6) | 15.8<br>(15.6-16.0) | 16.2<br>(16.0-16.4) | 16.9<br>(16.7-17.0) | 17.2<br>(17.1-17.4) | 17.7<br>(17.5-17.9) | 18.2<br>(17.9-18.6) |
| Central Europe, Eastern Europe, and Central Asia | 14.3<br>(14.1-14.5) | 14.4<br>(14.2-14.6) | 14.3<br>(14.0-14.5) | 14.2<br>(14.0-14.4) | 14.6<br>(14.3-14.8) | 13.7<br>(13.5-13.9) | 14.1<br>(13.9-14.3) | 14.3<br>(14.1-14.6) | 15.4<br>(15.2-15.6) | 16.3<br>(15.4-17.0) |
| Eastern Europe                                   | 14.7<br>(14.4-15.0) | 14.6<br>(14.2-14.9) | 14.4<br>(14.0-14.7) | 14.2<br>(13.9-14.5) | 14.6<br>(14.3-15.0) | 13.3<br>(13.0-13.6) | 13.6<br>(13.2-13.9) | 13.8<br>(13.4-14.1) | 14.9<br>(14.6-15.3) | 15.8<br>(14.4-17.1) |
| Belarus                                          | 16.1<br>(15.8-16.4) | 16.2<br>(15.9-16.4) | 15.6<br>(15.4-15.9) | 15.3<br>(15.0-15.5) | 15.3<br>(15.0-15.5) | 14.1<br>(13.9-14.4) | 14.0<br>(13.8-14.3) | 14.2<br>(13.9-14.4) | 14.8<br>(14.6-15.0) | 16.2<br>(15.2-17.4) |
| Estonia                                          | 14.4<br>(14.2-14.7) | 14.5<br>(14.3-14.7) | 14.3<br>(14.1-14.6) | 14.3<br>(14.1-14.5) | 14.7<br>(14.4-14.9) | 14.3<br>(14.1-14.5) | 15.3<br>(15.0-15.5) | 16.1<br>(15.9-16.4) | 17.6<br>(17.4-17.9) | 18.4<br>(17.8-19.2) |
| Latvia                                           | 14.8<br>(14.5-15.1) | 14.6<br>(14.3-14.9) | 14.5<br>(14.2-14.7) | 14.3<br>(14.0-14.5) | 14.6<br>(14.3-14.9) | 14.1<br>(13.9-14.4) | 15.3<br>(15.0-15.6) | 15.3<br>(15.0-15.5) | 16.3<br>(16.0-16.6) | 17.2<br>(16.4-18.0) |
| Lithuania                                        | 15.5<br>(15.3-16.0) | 15.8<br>(15.6-16.0) | 15.6<br>(15.4-15.9) | 15.4<br>(15.2-15.6) | 15.7<br>(15.5-15.9) | 15.0<br>(14.8-15.2) | 16.2<br>(16.0-16.4) | 16.1<br>(15.9-16.3) | 16.7<br>(16.5-17.0) | 17.6<br>(17.2-18.1) |
| Moldova                                          | 12.6<br>(11.5-13.9) | 13.0<br>(12.0-14.1) | 13.3<br>(12.7-14.0) | 12.9<br>(12.4-13.5) | 13.5<br>(13.0-13.9) | 12.1<br>(11.7-12.5) | 13.4<br>(13.0-13.8) | 13.3<br>(12.9-13.8) | 13.9<br>(13.4-14.4) | 15.1<br>(14.3-15.8) |
| Russia                                           | 14.5<br>(14.0-15.1) | 14.4<br>(13.9-14.9) | 14.2<br>(13.7-14.8) | 14.1<br>(13.6-14.6) | 14.6<br>(14.1-15.2) | 13.2<br>(12.7-13.7) | 13.4<br>(12.9-13.9) | 13.6<br>(13.1-14.2) | 14.9<br>(14.4-15.4) | 15.7<br>(13.8-17.6) |
| Ukraine                                          | 14.9<br>(14.6-15.1) | 14.7<br>(14.4-15.1) | 14.5<br>(14.2-14.8) | 14.3<br>(14.0-14.6) | 14.6<br>(14.3-14.9) | 13.3<br>(13.0-13.6) | 13.7<br>(13.5-14.1) | 13.7<br>(13.4-14.0) | 14.8<br>(14.5-15.1) | 15.7<br>(14.2-17.1) |
| Central Europe                                   | 13.7<br>(13.6-13.8) | 14.0<br>(13.9-14.1) | 13.9<br>(13.8-14.0) | 14.1<br>(14.0-14.2) | 14.4<br>(14.3-14.5) | 14.5<br>(14.4-14.6) | 15.2<br>(15.1-15.3) | 15.8<br>(15.7-15.9) | 16.5<br>(16.4-16.6) | 17.3<br>(17.1-17.6) |
| Albania                                          | 16.7<br>(16.2-17.3) | 17.0<br>(16.4-17.6) | 17.2<br>(16.7-17.8) | 17.1<br>(16.7-17.4) | 16.6<br>(16.4-16.8) | 16.9<br>(16.7-17.0) | 16.4<br>(16.2-16.6) | 16.2<br>(16.0-16.3) | 16.9<br>(16.5-17.3) | 17.8<br>(17.0-18.7) |
| Bosnia and Herzegovina                           | 13.5<br>(12.3-14.7) | 13.6<br>(12.7-14.7) | 13.8<br>(12.9-14.7) | 14.0<br>(13.2-14.8) | 14.4<br>(13.7-15.2) | 14.4<br>(13.7-15.1) | 15.7<br>(15.0-16.4) | 16.1<br>(15.4-16.8) | 16.7<br>(15.9-17.4) | 17.2<br>(16.3-18.2) |
| Bulgaria                                         | 14.0<br>(13.8-14.1) | 13.8<br>(13.6-14.0) | 13.8<br>(13.6-14.0) | 13.8<br>(13.6-13.9) | 14.1<br>(13.9-14.2) | 14.2<br>(13.9-14.2) | 14.7<br>(14.0-14.4) | 14.7<br>(14.6-14.9) | 15.5<br>(15.3-15.7) | 16.5<br>(15.2-17.1) |
| Croatia                                          | 13.1<br>(11.7-14.4) | 13.5<br>(12.2-14.9) | 13.9<br>(12.7-15.2) | 14.1<br>(13.6-14.7) | 14.7<br>(14.2-15.1) | 15.0<br>(14.6-15.4) | 15.3<br>(14.9-15.7) | 15.8<br>(15.4-16.2) | 16.5<br>(16.1-16.9) | 17.0<br>(16.3-17.9) |
| Czech Republic                                   | 12.8<br>(12.7-13.0) | 13.2<br>(13.0-13.3) | 13.1<br>(13.0-13.3) | 13.3<br>(13.2-13.5) | 13.7<br>(13.7-13.9) | 13.8<br>(14.6-14.8) | 14.7<br>(15.5-15.7) | 15.6<br>(16.2-16.5) | 16.4<br>(17.0-17.3) | 17.2<br>(17.8-18.5) |
| Hungary                                          | 13.3<br>(13.1-13.6) | 13.5<br>(13.3-13.8) | 13.4<br>(13.1-13.6) | 13.5<br>(13.2-13.8) | 14.0<br>(13.7-14.2) | 14.3<br>(14.0-14.6) | 15.0<br>(14.7-15.3) | 15.7<br>(15.4-15.9) | 16.3<br>(16.0-16.6) | 16.8<br>(16.2-17.5) |
| Macedonia                                        | 14.3<br>(13.8-14.7) | 14.2<br>(13.7-14.6) | 13.9<br>(13.6-14.3) | 13.9<br>(13.6-14.2) | 13.6<br>(13.2-13.9) | 13.3<br>(13.0-13.6) | 13.5<br>(13.2-13.8) | 13.8<br>(13.5-14.1) | 14.3<br>(14.0-14.6) | 15.0<br>(14.7-15.4) |
| Montenegro                                       | 15.9<br>(15.3-16.5) | 16.1<br>(15.4-16.8) | 16.3<br>(15.7-16.9) | 16.5<br>(15.7-17.0) | 16.9<br>(16.5-17.4) | 15.9<br>(15.4-16.3) | 15.7<br>(15.4-16.1) | 15.7<br>(15.9-16.6) | 17.0<br>(16.4-17.5) | 17.2<br>(16.6-17.9) |
| Poland                                           | 14.0<br>(13.8-14.2) | 14.3<br>(14.1-14.5) | 14.2<br>(14.0-14.4) | 14.2<br>(14.0-14.4) | 14.5<br>(14.3-14.7) | 14.9<br>(14.7-15.1) | 15.7<br>(15.5-15.9) | 16.7<br>(16.5-17.0) | 17.4<br>(17.2-17.6) | 18.3<br>(17.8-18.9) |
| Romania                                          | 13.8<br>(13.5-14.0) | 14.1<br>(13.9-14.4) | 13.9<br>(13.6-14.1) | 14.1<br>(13.8-14.3) | 14.4<br>(14.1-14.7) | 14.0<br>(13.8-14.3) | 14.9<br>(14.7-15.2) | 15.3<br>(15.1-15.6) | 15.9<br>(15.6-16.2) | 16.6<br>(16.0-17.2) |
| Serbia                                           | 14.6<br>(14.1-15.1) | 15.0<br>(14.4-15.7) | 15.2<br>(14.4-15.9) | 15.2<br>(14.5-16.0) | 14.9<br>(14.5-15.5) | 14.1<br>(13.8-14.5) | 14.5<br>(13.8-14.5) | 14.2<br>(14.2-14.9) | 15.4<br>(15.1-15.7) | 16.5<br>(16.2-16.8) |
| Slovakia                                         | 13.5<br>(13.3-13.8) | 13.9<br>(13.6-14.1) | 13.8<br>(13.6-14.1) | 13.9<br>(13.7-14.1) | 14.6<br>(13.8-14.3) | 14.0<br>(14.4-14.9) | 15.0<br>(14.7-15.2) | 15.5<br>(15.3-15.8) | 16.3<br>(16.1-16.5) | 17.2<br>(16.5-17.9) |
| Slovenia                                         | 13.1<br>(11.7-14.5) | 13.5<br>(12.2-14.8) | 13.9<br>(13.1-14.8) | 14.5<br>(14.0-14.9) | 15.9<br>(15.0-15.9) | 15.7<br>(15.5-16.4) | 16.7<br>(16.3-17.2) | 17.6<br>(17.2-18.1) | 18.8<br>(18.3-19.2) | 19.6<br>(18.9-20.4) |
| Central Asia                                     | 13.9<br>(13.3-14.4) | 14.3<br>(13.6-14.8) | 14.7<br>(14.3-15.0) | 14.8<br>(14.6-15.0) | 14.7<br>(14.5-14.9) | 13.7<br>(13.5-13.9) | 13.7<br>(13.4-13.8) | 13.6<br>(14.1-14.5) | 14.3<br>(14.1-14.5) | 15.3<br>(15.0-15.7) |
| Armenia                                          | 15.6<br>(14.6-16.9) | 16.0<br>(14.8-17.2) | 16.2<br>(15.6-16.8) | 16.1<br>(15.7-16.4) | 15.4<br>(15.1-15.8) | 14.7<br>(14.4-15.1) | 15.4<br>(15.1-15.8) | 15.3<br>(14.9-15.7) | 15.4<br>(15.0-15.7) | 16.8<br>(16.2-17.5) |
| Azerbaijan                                       | 14.2<br>(13.4-15.2) | 14.7<br>(13.9-15.6) | 14.8<br>(14.2-15.5) | 14.6<br>(14.1-15.0) | 14.5<br>(14.2-14.9) | 13.6<br>(13.4-14.2) | 13.6<br>(13.2-14.0) | 13.6<br>(13.1-14.1) | 13.7<br>(13.2-14.2) | 13.7<br>(14.6-16.7) |
| Georgia                                          | 14.8<br>(13.7-16.2) | 15.2<br>(13.9-16.6) | 15.2<br>(14.9-16.5) | 15.1<br>(14.7-15.7) | 15.1<br>(14.6-15.6) | 15.1<br>(15.0-15.9) | 15.6<br>(15.1-16.1) | 15.6<br>(15.0-15.8) | 16.4<br>(15.5-16.3) | 16.4<br>(15.4-17.4) |
| Kazakhstan                                       | 13.2<br>(11.5-15.2) | 13.7<br>(11.9-15.6) | 14.2<br>(13.1-15.2) | 14.6<br>(13.9-15.4) | 14.6<br>(14.1-15.2) | 13.0<br>(12.5-13.6) | 13.2<br>(12.6-13.7) | 13.1<br>(12.6-13.7) | 14.0<br>(13.5-14.6) | 15.4<br>(14.3-16.5) |
| Kyrgyzstan                                       | 12.6<br>(12.6-15.0) | 13.1<br>(13.1-15.3) | 14.4<br>(14.4-15.0) | 14.7<br>(14.4-15.0) | 14.6<br>(14.3-14.8) | 14.7<br>(12.9-13.4) | 13.2<br>(13.7-14.2) | 13.3<br>(13.1-13.6) | 14.0<br>(13.7-14.2) | 15.3<br>(14.7-15.8) |
| Mongolia                                         | 11.5<br>(11.0-12.1) | 12.8<br>(12.1-13.5) | 12.8<br>(12.3-13.6) | 13.0<br>(12.7-13.6) | 13.3<br>(12.7-13.8) | 12.2<br>(11.7-12.5) | 12.1<br>(11.7-12.5) | 12.3<br>(11.9-12.7) | 13.0<br>(13.2-13.5) | 14.0<br>(13.3-14.8) |
| Tajikistan                                       | 13.9<br>(13.4-14.6) | 14.3<br>(13.7-15.0) | 14.7<br>(14.4-15.4) | 15.0<br>(14.4-15.6) | 14.9<br>(14.4-15.5) | 14.3<br>(13.8-14.9) | 13.6<br>(13.1-14.2) | 13.3<br>(12.8-13.9) | 14.4<br>(13.8-15.0) | 15.9<br>(14.8-16.6) |
| Turkmenistan                                     | 13.3<br>(12.9-13.8) | 13.7<br>(13.3-14.0) | 14.0<br>(13.7-14.3) | 14.2<br>(14.0-14.4) | 14.1<br>(13.9-14.2) | 13.5<br>(13.4-13.7) | 13.8<br>(13.6-14.0) | 14.2<br>(14.0-14.4) | 14.8<br>(14.6-15.0) | 15.5<br>(15.1-15.9) |
| Uzbekistan                                       | 13.9<br>(13.1-14.5) | 14.2<br>(13.3-15.0) | 14.7<br>(14.1-15.2) | 15.0<br>(14.6-15.4) | 14.7<br>(14.4-15.1) | 13.4<br>(13.1-13.8) | 13.1<br>(12.8-13.4) | 12.9<br>(12.5-13.2) | 14.0<br>(13.7-14.3) | 14.6<br>(14.0-15.1) |
| Latin America and Caribbean                      | 14.4<br>(14.3-14.6) | 15.0<br>(15.0-15.1) | 15.5<br>(15.4-15.5) | 15.4<br>(15.4-15.5) | 16.0<br>(15.9-16.0) | 16.2<br>(16.2-16.3) | 16.9<br>(16.8-16.9) | 17.4<br>(17.3-17.4) | 17.7<br>(17.5-17.8) | 18.2<br>(18.1-18.3) |
| Central Latin America                            | 15.0<br>(14.9-15.2) | 15.5<br>(15.4-15.6) | 16.1<br>(16.0-16.2) | 16.2<br>(16.1-16.3) | 16.9<br>(16.8-17.0) | 17.1<br>(17.0-17.2) | 17.8<br>(17.7-17.9) | 17.9<br>(17.8-18.0) | 18.2<br>(18.1-18.3) | 18.6<br>(18.4-18.8) |
| Colombia                                         | 16.4<br>(16.2-16.6) | 16.5<br>(15.4-15.7) | 16.0<br>(15.8-16.3) | 15.7<br>(15.5-15.9) | 16.7<br>(16.5-16.9) | 16.8<br>(16.6-17.0) | 17.2<br>(17.0-17.4) | 17.5<br>(17.3-17.6) | 18.1<br>(17.9-18.3) | 19.0<br>(18.4-19.6) |
| Costa Rica                                       | 15.4<br>(15.2-15.6) | 16.2<br>(15.9-16.4) | 17.0<br>(16.8-17.2) | 17.3<br>(17.1-17.6) | 17.6<br>(17.4-17.9) | 18.0<br>(17.7-18.2) | 18.7<br>(18.4-18.9) | 19.7<br>(19.5-19.9) | 20.6<br>(20.4-20.8) | 20.9<br>(20.5-21.4) |
| El Salvador                                      | 14.7<br>(14.4-15.0) | 15.1<br>(14.8-15.4) | 17.1<br>(16.7-17.4) | 16.2<br>(15.9-16.5) | 16.4<br>(16.2-16.7) | 16.8<br>(16.6-17.1) | 17.7<br>(17.4-18.0) | 18.1<br>(17.8-18.3) | 18.6<br>(18.3-18.9) | 18.8<br>(18.2-19.5) |
| Guatemala                                        | 12.8<br>(12.0-13.5) | 14.1<br>(13.2-14.9) | 15.0<br>(14.1-15.9) | 14.6<br>(13.9-15.3) | 15.1<br>(14.5-15.9) | 15.7<br>(15.0-16.5) | 16.5<br>(15.7-17.4) | 17.1<br>(16.2-17.9) | 17.5<br>(16.7-18.3) | 17.8<br>(16.4-19.4) |
| Honduras                                         | 13.5<br>(12.8-14.1) | 14.4<br>(13.7-15.2) | 14.8<br>(14.0-15.6) | 14.2<br>(13.6-14.9) | 14.7<br>(14.0-15.4) | 14.8<br>(13.7-15.6) | 14.9<br>(13.7-16.3) | 15.2<br>(13.8-16.8) | 15.5<br>(14.0-17.3) | 15.9<br>(14.4-17.4) |
| Mexico                                           | 14.9<br>(14.7-15.1) | 15.7<br>(15.5-15.9) | 16.3<br>(16.2-16.4) | 16.6<br>(16.5-16.7) | 17.3<br>(17.2-17.4) | 17.6<br>(17.5-17.6) | 18.2<br>(18.1-18.3) | 18.1<br>(18.0-18.2) | 18.2<br>(18.1-18.3) | 18.4<br>(18.2-18.6) |
| Nicaragua                                        | 15.4<br>(15.0-15.9) | 17.4<br>(17.1-17.6) | 17.7<br>(17.1-18.3) | 17.8<br>(17.2-18.5) | 19.7<br>(19.5-20.0) | 19.0<br>(18.7-19.3) | 19.4<br>(19.2-19.7) | 19.4<br>(19.2-19.7) | 19.5<br>(19.2-19.7) | 19.8<br>(18.9-20.6) |
| Panama                                           | 15.7<br>(15.3-16.1) | 16.8<br>(16.4-17.2) | 17.6<br>(17.1-18.0) | 17.3<br>(16.9-17.7) | 17.5<br>(17.1-18.0) | 17.9<br>(17.4-18.2) | 18.9<br>(18.4-19.3) | 19.2<br>(18.8-19.7) | 19.6<br>(19.2-20.1) | 20.2<br>(19.4-21.0) |
| Venezuela                                        | 14.6<br>(14.2-15.0) | 14.7<br>(14.3-15.0) | 15.2<br>(14.8-15.5) | 15.8<br>(15.4-16.2) | 16.2<br>(15.9-16.6) | 16.6<br>(16.1-17.1) | 17.4<br>(17.0-17.8) | 18.1<br>(17.7-18.5) | 18.5<br>(18.0-18.9) | 18.5<br>(17.5-19.5) |
| Andean Latin America                             | 14.2<br>(13.6-14.9) | 15.6<br>(15.3-15.9) | 15.8<br>(15.5-16.1) | 15.9<br>(15.6-16.2) | 16.5<br>(16.2-16.8) | 16.7<br>(16.4-17.0) | 17.7<br>(17.5-18.0) | 18.6<br>(18.3-18.8) | 18.8<br>(18.4-19.1) | 19.3<br>(18.6-19.9) |
| Bolivia                                          | 12.6<br>(12.0-13.2) | 12.9<br>(12.2-13.4) | 13.1<br>(12.5-13.7) | 13.1<br>(12.6-13.9) | 13.8<br>(13.1-14.4) | 14.4<br>(13.9-15.0) | 15.2<br>(15.0-15.8) | 16.2<br>(15.6-16.7) | 16.4<br>(15.4-17.2) | 16.8<br>(15.6-17.9) |
| Ecuador                                          | 17.3<br>(17.1-17.6) | 16.8<br>(16.5-17.0) | 16.9<br>(16.6-17.2) | 17.0<br>(16.7-17.3) | 17.2<br>(17.0-17.5) | 17.8<br>(17.5-18.0) | 18.4<br>(18.1-18.7) | 19.0<br>(18.8-19.3) | 19.9<br>(19.1-19.6) | 20.9<br>(19.4-20.2) |
| Peru                                             | 13.4<br>(12.3-14.6) | 16.2<br>(15.7-16.7) | 16.3<br>(15.9-16.7) | 16.4<br>(16.0-16.7) | 17.3<br>(16.8-17.7) | 17.3<br>(16.7-17.6) | 18.3<br>(17.9-18.7) | 19.2<br>(18.8-19.7) | 19.4<br>(18.8-19.9) | 20.0<br>(18.9-21.1) |
| Caribbean                                        | 14.6<br>(14.4-14.9) | 15.1<br>(14.8-15.3) | 15.6<br>(15.4-15.8) | 15.7<br>(15.5-15.9) | 16.0<br>(15.7-16.0) | 16.6<br>(16.5-16.8) | 17.2<br>(16.5-16.8) | 17.7<br>(16.8-17.3) | 18.2<br>(15.3-17.2) | 18.4<br>(17.2-18.0) |
| Antigua and Barbuda                              | 12.6<br>(12.0-13.1) | 12.9<br>(12.4-13.4) | 13.1<br>(13.3-14.4) | 13.1<br>(13.9-15.1) |                     |                     |                     |                     |                     |                     |



Appendix Table 14A. Estimates of life expectancy at age 65 by location, both sexes, 1970, 1975, 1980, 1985, 1990, 1995, 2000, 2005, 2010, 2016

| Location                               | 1970                | 1975                | 1980                | 1985                | 1990                | 1995                | 2000                | 2005                | 2010                | 2016                |
|----------------------------------------|---------------------|---------------------|---------------------|---------------------|---------------------|---------------------|---------------------|---------------------|---------------------|---------------------|
| Barbados                               | 14.7<br>(14.3-15.0) | 15.1<br>(14.7-15.4) | 15.7<br>(15.3-16.0) | 15.8<br>(15.4-16.2) | 15.9<br>(15.5-16.2) | 16.1<br>(15.6-16.5) | 17.3<br>(16.9-17.7) | 18.0<br>(17.6-18.3) | 18.5<br>(18.2-18.9) | 18.2<br>(17.6-18.7) |
| Belize                                 | 15.8<br>(15.5-16.2) | 15.9<br>(15.6-16.3) | 15.9<br>(15.6-16.5) | 16.1<br>(15.5-16.6) | 16.4<br>(16.1-17.0) | 15.3<br>(14.7-15.9) | 14.3<br>(13.8-14.7) | 14.6<br>(14.1-15.0) | 15.1<br>(14.6-15.6) | 15.2<br>(14.5-16.1) |
| Bermuda                                | 12.1<br>(11.7-12.4) | 12.3<br>(11.9-12.6) | 12.8<br>(12.3-13.2) | 13.1<br>(12.7-13.5) | 13.2<br>(12.8-13.6) | 13.6<br>(13.2-14.0) | 13.7<br>(13.3-14.2) | 15.6<br>(15.1-16.1) | 16.9<br>(16.5-17.4) | 18.3<br>(17.9-19.2) |
| Cuba                                   | 15.7<br>(15.4-15.9) | 16.4<br>(16.1-16.6) | 16.9<br>(16.7-17.2) | 17.1<br>(16.8-17.3) | 16.9<br>(16.7-17.2) | 17.0<br>(16.7-17.2) | 17.7<br>(17.5-18.0) | 18.1<br>(17.9-18.4) | 18.4<br>(18.2-18.7) | 18.8<br>(18.3-19.3) |
| Dominica                               | 13.8<br>(13.5-14.2) | 14.3<br>(14.0-14.7) | 15.5<br>(15.1-15.9) | 15.1<br>(14.6-15.5) | 14.3<br>(13.9-14.8) | 14.1<br>(13.7-14.5) | 15.1<br>(14.6-15.6) | 15.5<br>(15.0-16.0) | 15.8<br>(15.3-16.2) | 16.0<br>(15.2-16.7) |
| Dominican Republic                     | 16.1<br>(15.7-16.6) | 16.6<br>(16.1-17.1) | 16.9<br>(16.4-17.5) | 16.6<br>(16.2-17.3) | 16.7<br>(16.3-17.1) | 17.0<br>(16.6-17.4) | 17.7<br>(17.2-18.4) | 18.0<br>(17.4-19.0) | 18.2<br>(17.5-19.2) | 18.4<br>(17.7-19.6) |
| Grenada                                | 14.3<br>(13.4-15.2) | 14.8<br>(14.1-15.6) | 14.9<br>(14.2-15.9) | 14.5<br>(13.9-15.4) | 14.8<br>(14.2-15.3) | 15.1<br>(14.6-15.5) | 15.1<br>(14.5-16.6) | 15.0<br>(14.5-15.4) | 15.2<br>(14.7-15.7) | 15.2<br>(14.5-16.1) |
| Guyana                                 | 12.5<br>(12.1-13.9) | 12.6<br>(12.2-13.1) | 13.0<br>(12.5-13.4) | 13.6<br>(13.1-14.1) | 13.2<br>(12.8-13.6) | 13.9<br>(13.6-14.2) | 14.4<br>(14.0-14.8) | 13.4<br>(13.0-13.8) | 13.1<br>(12.7-13.5) | 14.1<br>(13.5-14.8) |
| Haiti                                  | 11.1<br>(10.2-12.4) | 11.1<br>(10.4-12.2) | 11.2<br>(10.5-12.1) | 11.3<br>(10.7-11.9) | 11.5<br>(11.1-11.9) | 11.8<br>(11.4-12.2) | 12.3<br>(11.8-12.8) | 12.6<br>(12.0-13.4) | 9.2<br>(7.2-12.2)   | 13.3<br>(12.3-14.4) |
| Jamaica                                | 15.1<br>(14.6-15.5) | 15.9<br>(15.4-16.5) | 16.0<br>(15.5-16.5) | 16.3<br>(15.9-16.8) | 17.4<br>(16.9-17.9) | 17.1<br>(16.4-17.7) | 17.1<br>(16.6-17.5) | 17.6<br>(17.2-18.0) | 17.2<br>(16.6-17.8) | 17.1<br>(16.1-18.1) |
| Puerto Rico                            | 16.3<br>(16.0-16.6) | 16.1<br>(15.8-16.4) | 17.0<br>(16.7-17.3) | 17.1<br>(16.8-17.4) | 17.4<br>(17.1-17.7) | 17.5<br>(17.2-17.8) | 18.5<br>(18.2-18.8) | 18.9<br>(18.6-19.2) | 19.3<br>(19.0-19.6) | 19.5<br>(18.9-20.1) |
| Saint Lucia                            | 14.2<br>(13.8-14.6) | 13.5<br>(13.2-13.7) | 14.0<br>(13.8-14.3) | 14.7<br>(14.5-15.0) | 16.1<br>(15.8-16.3) | 17.0<br>(16.7-17.3) | 17.7<br>(17.5-18.0) | 17.4<br>(17.2-17.7) | 18.5<br>(18.2-18.9) | 18.6<br>(18.2-19.0) |
| Saint Vincent and the Grenadines       | 14.8<br>(13.9-15.3) | 14.5<br>(14.0-15.1) | 14.8<br>(14.3-15.4) | 14.8<br>(14.3-15.6) | 14.8<br>(14.5-15.3) | 14.8<br>(14.5-15.2) | 14.8<br>(14.3-15.1) | 15.0<br>(14.8-15.3) | 15.2<br>(14.8-15.6) | 15.2<br>(14.6-15.8) |
| Suriname                               | 13.4<br>(13.1-13.9) | 13.6<br>(13.3-13.9) | 13.9<br>(13.7-14.1) | 15.2<br>(15.0-15.4) | 16.1<br>(15.9-16.3) | 16.0<br>(15.8-16.3) | 15.5<br>(15.1-15.8) | 15.2<br>(14.8-15.5) | 15.5<br>(15.2-15.9) | 15.9<br>(15.3-16.5) |
| Trinidad and Tobago                    | 12.5<br>(12.3-12.8) | 13.2<br>(13.0-13.5) | 14.0<br>(13.7-14.2) | 14.1<br>(13.8-14.3) | 14.0<br>(13.7-14.2) | 14.2<br>(13.9-14.4) | 14.6<br>(14.3-14.8) | 15.7<br>(15.5-16.0) | 16.4<br>(16.1-16.7) | 16.6<br>(16.1-17.1) |
| Virgin Islands, U.S.                   | 13.4<br>(12.8-13.7) | 13.9<br>(13.5-14.3) | 14.5<br>(14.1-14.8) | 15.2<br>(14.9-15.7) | 15.6<br>(15.2-16.2) | 15.7<br>(15.3-16.1) | 16.0<br>(15.6-16.3) | 16.2<br>(15.9-16.5) | 16.3<br>(15.8-16.7) | 16.6<br>(16.0-17.3) |
| Tropical Latin America                 | 13.8<br>(13.6-14.1) | 14.5<br>(14.3-14.7) | 14.6<br>(14.5-14.7) | 14.5<br>(14.4-14.6) | 14.9<br>(14.8-15.0) | 15.2<br>(15.1-15.3) | 15.8<br>(15.7-15.9) | 16.6<br>(16.5-16.7) | 17.3<br>(17.2-17.4) | 17.8<br>(17.6-17.9) |
| Brazil                                 | 14.4<br>(13.5-14.0) | 14.8<br>(14.2-14.6) | 14.8<br>(14.4-14.7) | 14.8<br>(14.3-14.5) | 14.8<br>(14.7-14.9) | 15.2<br>(15.0-15.3) | 15.2<br>(15.7-15.9) | 15.6<br>(16.5-16.7) | 16.6<br>(17.2-17.4) | 17.3<br>(17.6-18.0) |
| Paraguay                               | 16.5<br>(16.4-16.7) | 16.7<br>(16.4-16.9) | 17.2<br>(16.9-17.5) | 17.2<br>(16.9-17.4) | 17.6<br>(17.3-17.9) | 17.4<br>(16.9-17.7) | 17.4<br>(17.1-17.6) | 17.1<br>(16.7-17.4) | 17.1<br>(16.3-17.3) | 16.8<br>(16.1-17.6) |
| Southeast Asia, East Asia, and Oceania | 13.2<br>(13.1-13.3) | 13.5<br>(13.3-13.6) | 13.3<br>(13.1-13.4) | 13.6<br>(13.5-13.7) | 13.5<br>(13.4-13.6) | 13.8<br>(13.7-13.9) | 14.2<br>(14.2-14.3) | 15.0<br>(14.9-15.1) | 15.8<br>(15.8-16.0) | 16.8<br>(16.6-16.9) |
| East Asia                              | 13.4<br>(13.3-13.6) | 13.7<br>(13.5-13.8) | 13.2<br>(13.1-13.4) | 13.5<br>(13.4-13.7) | 13.4<br>(13.2-13.5) | 13.7<br>(13.6-13.8) | 14.1<br>(14.1-14.3) | 15.0<br>(14.9-15.1) | 16.0<br>(15.9-16.1) | 17.0<br>(16.8-17.1) |
| China                                  | 14.7<br>(13.3-13.6) | 15.2<br>(13.5-13.8) | 15.3<br>(13.0-13.3) | 15.4<br>(13.4-13.6) | 15.5<br>(13.2-13.4) | 13.8<br>(13.5-13.8) | 13.5<br>(14.0-14.3) | 14.9<br>(14.9-15.1) | 15.0<br>(15.8-16.1) | 15.0<br>(16.8-17.1) |
| North Korea                            | 13.1<br>(13.4-15.4) | 13.9<br>(14.4-16.0) | 14.2<br>(14.5-16.1) | 14.8<br>(14.6-16.2) | 15.5<br>(14.7-16.4) | 16.1<br>(12.6-15.3) | 17.1<br>(12.4-14.8) | 18.1<br>(14.4-15.5) | 19.1<br>(14.5-15.4) | 19.4<br>(14.6-15.5) |
| Taiwan (Province of China)             | 12.5<br>(12.8-13.3) | 12.9<br>(13.7-14.2) | 13.4<br>(14.0-14.5) | 13.8<br>(14.5-15.0) | 14.1<br>(15.3-15.8) | 14.3<br>(15.9-16.4) | 14.5<br>(16.8-17.4) | 14.9<br>(17.8-18.3) | 15.4<br>(18.8-19.3) | 16.1<br>(18.6-20.4) |
| Southeast Asia                         | 11.4<br>(12.3-12.8) | 9.5<br>(12.7-13.1)  | 11.5<br>(13.2-13.6) | 11.5<br>(13.6-14.0) | 11.8<br>(13.9-14.3) | 12.1<br>(14.1-14.5) | 12.3<br>(14.3-14.7) | 13.0<br>(14.7-15.1) | 13.6<br>(15.3-15.6) | 14.2<br>(15.9-16.3) |
| Cambodia                               | 11.9<br>(10.8-12.0) | 12.4<br>(8.0-11.3)  | 13.0<br>(11.0-12.0) | 13.5<br>(11.1-12.0) | 13.6<br>(11.5-12.3) | 13.8<br>(11.8-12.4) | 14.1<br>(12.0-12.6) | 14.1<br>(12.6-13.3) | 14.7<br>(13.3-14.0) | 15.2<br>(13.9-14.6) |
| Indonesia                              | 10.6<br>(11.7-12.2) | 10.9<br>(12.1-12.6) | 11.1<br>(12.7-13.2) | 11.5<br>(13.2-13.7) | 11.7<br>(13.4-13.8) | 12.0<br>(13.6-14.0) | 12.5<br>(13.9-14.2) | 13.1<br>(14.2-14.6) | 13.7<br>(14.5-14.9) | 14.5<br>(14.9-15.6) |
| Laos                                   | 12.3<br>(10.3-10.9) | 13.1<br>(10.5-11.1) | 13.5<br>(10.8-11.3) | 14.0<br>(11.2-11.7) | 14.2<br>(11.5-12.0) | 14.4<br>(11.8-12.3) | 14.6<br>(12.3-12.8) | 14.6<br>(12.8-13.4) | 15.4<br>(13.5-14.0) | 16.1<br>(14.2-14.9) |
| Malaysia                               | 12.5<br>(12.2-12.5) | 12.2<br>(12.9-13.2) | 12.7<br>(13.3-13.7) | 12.7<br>(13.8-14.2) | 13.4<br>(14.1-14.4) | 13.9<br>(14.3-14.5) | 14.8<br>(14.5-14.8) | 14.8<br>(14.9-15.1) | 17.2<br>(15.2-15.6) | 18.2<br>(15.8-16.4) |
| Maldives                               | 10.5<br>(11.0-14.0) | 10.7<br>(10.7-13.8) | 11.8<br>(11.1-13.6) | 12.4<br>(12.2-13.3) | 12.8<br>(13.0-13.9) | 13.2<br>(13.2-14.5) | 14.5<br>(14.3-15.3) | 15.1<br>(15.7-16.8) | 16.1<br>(16.6-17.7) | 16.5<br>(16.9-19.5) |
| Mauritius                              | 10.5<br>(10.5-10.7) | 11.0<br>(10.5-10.9) | 11.7<br>(11.6-12.1) | 11.7<br>(12.2-12.6) | 11.9<br>(13.0-13.4) | 12.1<br>(13.6-14.0) | 12.5<br>(14.3-14.8) | 13.9<br>(14.8-15.3) | 14.7<br>(15.8-16.3) | 14.7<br>(15.7-17.3) |
| Myanmar                                | 13.3<br>(10.9-11.1) | 14.9<br>(10.5-11.6) | 14.9<br>(10.8-11.9) | 14.7<br>(11.2-12.3) | 14.7<br>(11.4-12.5) | 14.3<br>(11.5-12.7) | 13.9<br>(11.8-13.0) | 13.7<br>(12.3-13.7) | 14.0<br>(13.0-14.5) | 14.4<br>(14.2-15.1) |
| Philippines                            | 15.3<br>(15.0-15.7) | 14.9<br>(14.6-15.2) | 14.9<br>(14.6-15.2) | 14.7<br>(14.4-15.0) | 14.7<br>(14.4-15.0) | 14.3<br>(14.0-14.6) | 13.9<br>(13.6-14.2) | 13.7<br>(13.4-14.0) | 14.0<br>(13.7-14.3) | 14.4<br>(13.7-15.1) |
| Sri Lanka                              | 12.7<br>(12.7-13.3) | 12.9<br>(12.6-13.3) | 14.5<br>(14.2-14.8) | 15.1<br>(14.8-15.4) | 16.1<br>(15.8-16.5) | 16.3<br>(16.1-17.0) | 16.3<br>(15.9-16.8) | 16.7<br>(16.2-17.2) | 17.0<br>(16.4-17.6) | 18.1<br>(16.8-19.6) |
| Seychelles                             | 14.2<br>(13.4-14.8) | 14.6<br>(14.0-15.0) | 14.8<br>(14.3-15.3) | 14.8<br>(13.8-14.6) | 14.4<br>(14.1-14.7) | 14.8<br>(14.4-15.2) | 15.1<br>(14.8-15.4) | 15.5<br>(15.2-15.8) | 16.0<br>(15.6-16.4) | 16.2<br>(15.5-16.8) |
| Thailand                               | 15.2<br>(14.9-15.4) | 15.8<br>(15.5-16.0) | 15.6<br>(15.4-15.9) | 15.5<br>(15.3-15.8) | 15.9<br>(15.7-16.2) | 16.5<br>(16.2-16.8) | 17.1<br>(16.8-17.4) | 17.6<br>(17.3-17.9) | 18.8<br>(18.5-19.1) | 19.4<br>(18.8-20.0) |
| Timor-Leste                            | 11.1<br>(10.1-12.5) | 11.5<br>(10.5-12.7) | 12.4<br>(11.2-14.0) | 13.0<br>(11.9-14.2) | 13.4<br>(12.5-14.5) | 13.9<br>(13.1-14.7) | 14.3<br>(13.6-15.1) | 14.7<br>(14.0-15.7) | 16.0<br>(15.1-17.0) | 16.3<br>(15.2-17.6) |
| Vietnam                                | 12.5<br>(11.6-13.3) | 12.9<br>(12.1-13.9) | 13.4<br>(12.6-14.3) | 14.1<br>(13.3-14.9) | 14.5<br>(13.7-15.4) | 14.7<br>(13.9-15.7) | 14.9<br>(14.3-15.7) | 15.2<br>(14.7-16.1) | 15.9<br>(15.3-16.6) | 16.5<br>(16.0-16.9) |
| Oceania                                | 10.8<br>(10.2-11.6) | 10.8<br>(10.3-11.5) | 10.8<br>(10.3-11.5) | 10.9<br>(10.4-11.5) | 10.9<br>(10.5-11.5) | 11.1<br>(10.6-11.7) | 11.2<br>(10.6-11.8) | 11.2<br>(10.6-11.8) | 11.3<br>(10.7-12.0) | 11.8<br>(11.1-12.4) |
| American Samoa                         | 13.2<br>(12.7-13.7) | 13.8<br>(13.3-14.4) | 14.1<br>(13.5-14.6) | 14.3<br>(13.7-14.8) | 14.5<br>(14.1-15.0) | 14.6<br>(14.1-15.2) | 15.0<br>(14.4-15.5) | 15.1<br>(14.5-15.6) | 15.4<br>(14.8-16.0) | 15.3<br>(14.4-16.3) |
| Federated States of Micronesia         | 11.6<br>(10.6-12.9) | 11.5<br>(10.6-12.7) | 11.6<br>(10.8-12.7) | 11.7<br>(11.0-12.7) | 11.9<br>(11.2-12.8) | 12.2<br>(11.4-13.1) | 12.5<br>(11.6-13.3) | 12.5<br>(11.5-13.5) | 12.4<br>(11.2-13.5) | 12.4<br>(11.2-13.5) |
| Fiji                                   | 12.4<br>(11.5-13.4) | 12.2<br>(11.5-13.1) | 12.4<br>(11.7-13.1) | 12.7<br>(12.1-13.2) | 12.5<br>(11.4-13.6) | 12.2<br>(11.4-13.1) | 12.1<br>(11.5-12.7) | 12.2<br>(11.6-12.8) | 12.3<br>(11.4-13.1) | 12.6<br>(11.4-14.1) |
| Guam                                   | 13.5<br>(13.1-13.9) | 13.6<br>(13.2-14.1) | 14.7<br>(14.2-15.2) | 15.6<br>(15.1-16.1) | 15.7<br>(15.3-16.1) | 15.8<br>(15.3-16.3) | 16.0<br>(15.6-16.4) | 15.9<br>(15.5-16.3) | 15.3<br>(14.9-15.8) | 15.4<br>(14.8-16.2) |
| Kiribati                               | 11.0<br>(10.3-12.0) | 11.4<br>(10.7-12.4) | 11.4<br>(10.7-12.2) | 11.0<br>(10.5-11.5) | 10.9<br>(10.5-11.2) | 10.9<br>(10.7-11.2) | 11.2<br>(10.9-11.5) | 11.5<br>(11.0-11.9) | 11.6<br>(11.1-12.2) | 11.8<br>(11.2-12.5) |
| Marshall Islands                       | 11.8<br>(10.9-13.1) | 12.2<br>(11.4-13.3) | 12.5<br>(11.8-13.5) | 12.6<br>(12.1-13.3) | 12.5<br>(12.2-12.8) | 12.3<br>(11.9-12.7) | 12.0<br>(11.5-12.4) | 11.7<br>(11.2-12.3) | 11.9<br>(11.2-12.6) | 12.3<br>(11.5-13.2) |
| Northern Mariana Islands               | 13.7<br>(12.7-14.8) | 14.3<br>(13.2-15.4) | 14.8<br>(13.7-16.0) | 15.1<br>(14.0-16.2) | 15.7<br>(14.6-16.8) | 16.5<br>(15.5-17.5) | 16.9<br>(16.0-17.8) | 16.9<br>(16.1-17.8) | 16.8<br>(15.9-17.7) | 16.6<br>(15.7-17.6) |
| Papua New Guinea                       | 10.2<br>(9.5-11.5)  | 10.3<br>(9.5-11.4)  | 10.2<br>(9.5-11.1)  | 10.1<br>(9.5-10.9)  | 10.2<br>(9.5-11.0)  | 10.3<br>(9.7-11.2)  | 10.5<br>(9.8-11.3)  | 10.4<br>(9.7-11.3)  | 10.7<br>(9.9-11.6)  | 11.2<br>(10.4-12.1) |
| Samoa                                  | 13.2<br>(12.7-13.8) | 12.9<br>(12.5-13.4) | 13.4<br>(12.8-13.9) | 13.6<br>(12.9-14.3) | 13.9<br>(13.2-14.7) | 14.2<br>(13.5-14.9) | 14.5<br>(13.8-15.3) | 14.8<br>(14.1-15.6) | 14.9<br>(14.2-15.7) | 15.1<br>(14.4-15.9) |
| Solomon Islands                        | 10.1<br>(9.3-11.2)  | 9.9<br>(9.3-10.8)   | 10.5<br>(9.8-11.1)  | 10.6<br>(10.1-11.4) | 10.7<br>(10.1-11.6) | 11.0<br>(10.3-11.7) | 11.1<br>(10.4-11.8) | 10.9<br>(10.2-11.7) | 11.1<br>(10.2-11.9) | 11.5<br>(10.5-12.4) |
| Tonga                                  | 12.7<br>(12.9-13.6) | 12.8<br>(12.0-13.6) | 12.7<br>(12.0-13.6) | 13.0<br>(12.2-13.8) | 13.4<br>(12.7-14.3) | 13.7<br>(12.9-14.5) | 13.9<br>(13.2-14.5) | 14.2<br>(13.5-14.9) | 14.4<br>(13.7-15.2) | 14.6<br>(13.8-15.5) |
| Vanuatu                                | 10.5<br>(9.7-11.7)  | 10.6<br>(9.9-11.6)  | 10.9<br>(10.2-11.6) | 10.9<br>(10.5-11.8) | 11.1<br>(10.6-11.9) | 11.4<br>(10.7-12.0) | 11.4<br>(10.8-12.1) | 11.4<br>(10.7-12.3) | 11.7<br>(10.7-12.5) | 12.0<br>(11.0-12.9) |
| North Africa and Middle East           | 13.9<br>(13.7-14.2) | 14.2<br>(14.0-14.4) | 14.7<br>(14.5-14.8) | 14.9<br>(14.7-15.1) | 15.3<br>(15.1-15.4) | 15.3<br>(15.0-15.3) | 15.3<br>(15.5-15.8) | 15.6<br>(15.6-16.1) | 15.9<br>(16.0-16.5) | 16.7<br>(16.4-17.0) |
| North Africa and Middle East           | 10.4<br>(9.9-10.8)  | 10.2<br>(9.8-10.6)  | 10.0<br>(9.6-10.4)  | 10.0<br>(9.5-10.5)  | 10.3<br>(9.9-10.5)  | 9.8<br>(9.6-10.5)   | 10.0<br>(9.4-10.3)  | 10.0<br>(9.6-10.4)  | 10.3<br>(10.0-10.8) | 10.8<br>(10.4-11.2) |
| Afghanistan                            | 14.1<br>(13.7-14.6) | 13.9<br>(13.4-14.4) | 14.2<br>(13.8-14.6) | 15.6<br>(15.2-15.9) | 16.1<br>(15.7-16.6) | 16.8<br>(16.1-17.0) | 17.0<br>(16.4-17.5) | 17.6<br>(17.0-18.0) | 18.1<br>(17.8-18.3) | 18.2<br>(17.8-18.7) |
| Algeria                                | 13.8<br>(12.9-14.8) | 13.6<br>(12.6-14.6) | 13.5<br>(12.6-14.4) | 13.0<br>(12.4-13.7) | 12.3<br>(11.6       |                     |                     |                     |                     |                     |

Appendix Table 14A. Estimates of life expectancy at age 65 by location, both sexes, 1970, 1975, 1980, 1985, 1990, 1995, 2000, 2005, 2010, 2016

| Location                    | 1970                | 1975                | 1980                | 1985                | 1990                | 1995                | 2000                | 2005                | 2010                | 2016                |
|-----------------------------|---------------------|---------------------|---------------------|---------------------|---------------------|---------------------|---------------------|---------------------|---------------------|---------------------|
| Egypt                       | 13.0<br>(12.8-13.3) | 13.5<br>(13.3-13.8) | 14.1<br>(13.8-14.4) | 13.2<br>(12.9-13.5) | 14.3<br>(14.0-14.6) | 14.6<br>(14.3-15.0) | 15.3<br>(15.0-15.6) | 15.0<br>(14.7-15.4) | 14.8<br>(14.4-15.1) | 15.4<br>(14.6-16.2) |
| Iran                        | 16.1<br>(15.2-17.2) | 16.6<br>(15.8-17.5) | 16.7<br>(16.0-17.7) | 16.9<br>(16.0-17.8) | 15.8<br>(15.1-16.7) | 15.9<br>(15.3-16.5) | 15.8<br>(15.2-16.4) | 15.6<br>(14.6-16.5) | 16.4<br>(15.3-17.4) | 17.1<br>(16.1-18.2) |
| Iraq                        | 14.1<br>(13.7-14.4) | 13.8<br>(13.2-14.4) | 13.7<br>(13.0-14.6) | 13.4<br>(12.7-14.4) | 13.6<br>(12.8-14.3) | 13.2<br>(12.5-13.8) | 13.1<br>(12.5-13.9) | 13.2<br>(12.7-14.4) | 13.6<br>(12.7-14.4) | 14.1<br>(13.2-15.4) |
| Jordan                      | 13.8<br>(13.0-14.4) | 14.2<br>(13.5-14.8) | 14.2<br>(13.2-15.1) | 14.6<br>(13.9-15.4) | 15.7<br>(15.0-16.4) | 15.9<br>(15.1-16.8) | 15.9<br>(14.9-17.0) | 15.4<br>(14.3-16.6) | 17.1<br>(15.8-18.2) | 17.7<br>(16.3-19.1) |
| Kuwait                      | 15.0<br>(14.2-15.7) | 14.9<br>(14.3-15.5) | 15.2<br>(14.5-15.8) | 15.5<br>(14.8-16.2) | 16.7<br>(15.8-17.7) | 16.5<br>(15.8-17.3) | 16.8<br>(16.1-17.6) | 17.3<br>(16.5-18.1) | 17.7<br>(16.9-18.5) | 18.6<br>(17.1-20.5) |
| Lebanon                     | 14.4<br>(13.1-15.6) | 14.2<br>(12.9-15.5) | 13.6<br>(12.4-15.0) | 14.3<br>(13.4-15.6) | 14.8<br>(14.0-16.1) | 16.2<br>(15.7-17.0) | 17.6<br>(16.7-18.3) | 18.3<br>(17.7-19.0) | 19.2<br>(18.5-19.8) | 19.3<br>(18.5-20.2) |
| Libya                       | 16.4<br>(15.8-17.0) | 16.6<br>(16.0-17.2) | 16.8<br>(16.2-17.4) | 16.7<br>(16.2-17.3) | 16.7<br>(16.3-17.2) | 16.9<br>(16.4-17.4) | 16.9<br>(16.3-17.4) | 17.1<br>(16.4-17.6) | 17.2<br>(16.5-17.9) | 16.8<br>(16.2-17.6) |
| Morocco                     | 13.5<br>(13.1-13.8) | 13.7<br>(13.4-14.0) | 14.0<br>(13.7-14.3) | 14.6<br>(14.3-14.9) | 14.9<br>(14.5-15.3) | 15.2<br>(14.8-15.6) | 15.8<br>(15.3-16.2) | 16.2<br>(15.7-16.6) | 16.6<br>(16.1-17.1) | 17.0<br>(16.5-17.6) |
| Palestine                   | 14.2<br>(13.0-15.2) | 14.6<br>(13.6-15.6) | 15.1<br>(14.0-16.1) | 14.8<br>(13.8-15.7) | 14.7<br>(13.9-15.5) | 14.3<br>(13.8-14.9) | 13.6<br>(13.4-13.8) | 13.7<br>(13.6-13.9) | 13.6<br>(13.5-13.7) | 13.3<br>(13.0-13.6) |
| Oman                        | 14.2<br>(13.8-14.6) | 14.6<br>(14.2-15.1) | 15.0<br>(14.7-15.5) | 15.5<br>(15.2-16.0) | 15.8<br>(15.4-16.3) | 16.0<br>(15.5-16.7) | 16.2<br>(15.8-16.7) | 16.7<br>(16.2-17.1) | 16.4<br>(15.9-16.9) | 17.3<br>(17.0-17.6) |
| Qatar                       | 15.0<br>(13.4-16.8) | 15.3<br>(13.5-17.0) | 14.9<br>(13.7-16.5) | 16.0<br>(14.7-16.9) | 16.8<br>(15.9-17.9) | 16.6<br>(15.6-17.5) | 16.6<br>(15.5-17.6) | 17.3<br>(16.1-18.5) | 18.8<br>(17.7-19.9) | 19.2<br>(17.3-21.1) |
| Saudi Arabia                | 17.0<br>(16.3-17.8) | 17.4<br>(16.7-18.1) | 17.4<br>(16.7-18.0) | 16.7<br>(16.1-17.2) | 15.9<br>(15.4-16.4) | 15.2<br>(14.8-15.7) | 14.3<br>(14.0-14.6) | 14.5<br>(14.3-14.8) | 15.1<br>(14.7-15.4) | 16.5<br>(16.0-17.0) |
| Sudan                       | 12.6<br>(12.3-12.8) | 12.6<br>(12.3-12.8) | 12.8<br>(12.5-13.1) | 12.3<br>(11.8-12.8) | 13.1<br>(12.8-13.5) | 13.2<br>(12.9-13.5) | 13.5<br>(13.2-13.9) | 14.0<br>(13.7-14.4) | 14.7<br>(14.4-15.1) | 15.3<br>(14.9-15.7) |
| Syria                       | 14.9<br>(14.6-15.3) | 15.2<br>(14.9-15.5) | 15.4<br>(15.2-15.7) | 15.6<br>(15.3-15.9) | 15.7<br>(15.3-16.0) | 15.6<br>(14.9-16.1) | 15.6<br>(15.3-16.1) | 16.3<br>(16.0-16.7) | 17.0<br>(16.7-17.4) | 16.5<br>(16.0-17.2) |
| Tunisia                     | 13.4<br>(13.0-13.8) | 13.9<br>(13.5-14.2) | 13.9<br>(13.4-14.4) | 15.5<br>(15.0-16.0) | 15.8<br>(15.2-16.3) | 15.7<br>(15.2-16.2) | 17.0<br>(16.5-17.5) | 17.4<br>(16.9-18.1) | 17.8<br>(16.8-18.7) | 17.8<br>(16.8-18.9) |
| Turkey                      | 14.8<br>(13.8-16.1) | 15.4<br>(14.6-16.3) | 16.2<br>(15.6-16.9) | 17.1<br>(16.5-17.7) | 17.3<br>(17.0-17.7) | 16.7<br>(16.4-16.9) | 17.6<br>(17.3-17.9) | 18.5<br>(18.2-19.0) | 19.0<br>(18.5-19.6) | 19.4<br>(18.2-20.4) |
| United Arab Emirates        | 15.8<br>(14.5-17.1) | 15.9<br>(14.6-17.2) | 16.0<br>(14.6-17.4) | 15.9<br>(14.7-17.2) | 15.6<br>(14.3-16.7) | 15.7<br>(14.8-16.6) | 16.2<br>(15.4-17.0) | 17.0<br>(16.6-17.4) | 16.8<br>(16.0-17.5) | 16.7<br>(15.6-17.5) |
| Yemen                       | 11.7<br>(11.1-12.2) | 12.2<br>(11.6-12.8) | 12.6<br>(12.0-13.2) | 12.8<br>(12.1-13.4) | 12.8<br>(12.2-13.5) | 12.9<br>(12.3-13.6) | 12.9<br>(12.7-13.7) | 13.2<br>(13.1-14.1) | 13.5<br>(13.7-14.7) | 14.2<br>(13.6-14.9) |
| South Asia                  | 10.9<br>(10.8-11.1) | 11.3<br>(11.1-11.4) | 11.7<br>(11.6-11.9) | 12.1<br>(11.9-12.2) | 12.4<br>(12.3-12.6) | 12.4<br>(12.6-12.9) | 13.1<br>(13.0-13.3) | 13.6<br>(13.5-13.8) | 14.0<br>(13.8-14.1) | 14.5<br>(14.3-14.7) |
| South Asia                  | 10.9<br>(10.8-11.1) | 11.3<br>(11.1-11.4) | 11.7<br>(11.6-11.9) | 12.1<br>(11.9-12.2) | 12.4<br>(12.3-12.6) | 12.4<br>(12.6-12.9) | 13.1<br>(13.0-13.3) | 13.6<br>(13.5-13.8) | 14.0<br>(13.8-14.1) | 14.5<br>(14.3-14.7) |
| Bangladesh                  | 11.8<br>(11.0-12.8) | 12.8<br>(12.0-13.5) | 12.8<br>(12.2-13.4) | 12.6<br>(12.2-13.1) | 12.8<br>(12.4-13.3) | 13.6<br>(13.2-14.1) | 14.6<br>(14.2-15.1) | 15.2<br>(14.9-15.5) | 16.4<br>(15.4-16.1) | 16.4<br>(15.7-16.9) |
| Bhutan                      | 12.7<br>(11.8-13.5) | 12.9<br>(12.0-13.7) | 13.0<br>(12.1-13.9) | 13.3<br>(12.4-14.1) | 13.7<br>(12.9-14.5) | 14.3<br>(13.6-14.9) | 15.3<br>(14.7-15.9) | 16.3<br>(15.6-16.9) | 16.9<br>(16.2-17.5) | 17.0<br>(16.2-17.8) |
| India                       | 10.5<br>(10.4-10.7) | 11.4<br>(10.7-11.0) | 11.4<br>(11.2-11.5) | 11.8<br>(11.6-11.9) | 12.2<br>(12.0-12.4) | 12.6<br>(12.4-12.8) | 13.0<br>(12.8-13.1) | 13.5<br>(13.3-13.6) | 13.8<br>(13.7-14.0) | 14.3<br>(14.1-14.5) |
| Nepal                       | 12.3<br>(11.8-12.7) | 12.3<br>(11.9-12.7) | 12.4<br>(11.9-12.7) | 12.4<br>(12.0-12.8) | 12.5<br>(12.2-12.9) | 12.8<br>(12.5-13.1) | 13.5<br>(13.1-13.8) | 13.9<br>(13.6-14.3) | 14.3<br>(13.9-14.7) | 15.0<br>(14.5-15.4) |
| Pakistan                    | 13.8<br>(13.1-14.6) | 14.1<br>(13.4-14.7) | 14.3<br>(13.8-14.8) | 14.4<br>(14.1-14.8) | 14.2<br>(13.8-14.6) | 13.3<br>(12.9-13.7) | 13.3<br>(12.9-13.6) | 13.3<br>(12.9-13.8) | 13.9<br>(13.3-14.5) | 14.4<br>(13.6-15.2) |
| Sub-Saharan Africa          | 12.2<br>(12.0-12.4) | 12.4<br>(12.3-12.6) | 12.6<br>(12.4-12.7) | 12.7<br>(12.5-12.8) | 12.7<br>(12.5-12.8) | 12.6<br>(12.4-12.8) | 12.4<br>(12.2-12.6) | 12.8<br>(12.6-13.0) | 13.4<br>(13.2-13.5) | 14.1<br>(13.9-14.3) |
| Southern Sub-Saharan Africa | 14.5<br>(14.0-14.9) | 15.0<br>(14.6-15.4) | 15.2<br>(14.9-15.5) | 15.7<br>(15.4-15.9) | 16.2<br>(15.9-16.7) | 16.3<br>(15.3-16.2) | 16.3<br>(12.9-13.7) | 17.0<br>(12.7-13.3) | 17.0<br>(13.2-13.8) | 17.0<br>(15.0-16.6) |
| Botswana                    | 10.7<br>(10.3-11.3) | 11.4<br>(11.0-12.1) | 12.0<br>(11.5-12.7) | 12.8<br>(12.3-13.4) | 13.1<br>(12.4-15.0) | 13.1<br>(10.1-18.2) | 11.6<br>(8.0-14.8)  | 11.3<br>(8.8-14.2)  | 13.5<br>(10.9-16.2) | 14.4<br>(12.3-18.9) |
| Lesotho                     | 11.1<br>(10.1-12.2) | 11.4<br>(10.3-12.6) | 11.9<br>(10.8-13.1) | 12.2<br>(11.3-13.3) | 12.3<br>(11.7-13.2) | 12.3<br>(11.4-13.6) | 12.2<br>(9.8-12.4)  | 12.0<br>(9.0-10.9)  | 12.0<br>(9.4-11.4)  | 14.9<br>(9.7-12.6)  |
| Namibia                     | 11.7<br>(11.1-12.4) | 11.9<br>(11.3-12.6) | 12.2<br>(11.5-12.6) | 12.2<br>(11.8-12.7) | 12.2<br>(12.0-12.8) | 12.2<br>(11.6-13.4) | 12.2<br>(10.3-13.7) | 11.5<br>(10.6-13.8) | 12.0<br>(12.5-15.8) | 14.9<br>(13.4-17.3) |
| South Africa                | 15.6<br>(15.1-16.2) | 16.1<br>(15.6-16.6) | 16.2<br>(15.8-16.6) | 16.6<br>(16.3-16.9) | 16.6<br>(16.8-17.3) | 17.1<br>(16.4-16.8) | 17.1<br>(13.9-14.2) | 14.0<br>(13.7-14.0) | 14.0<br>(14.0-14.3) | 16.2<br>(15.9-16.5) |
| Swaziland                   | 11.5<br>(10.9-12.6) | 12.0<br>(10.7-13.1) | 12.3<br>(11.0-13.3) | 13.1<br>(11.3-15.5) | 14.1<br>(11.6-13.5) | 13.8<br>(11.4-15.1) | 13.8<br>(9.2-13.5)  | 10.5<br>(8.4-11.3)  | 11.1<br>(9.6-12.8)  | 12.4<br>(11.1-15.7) |
| Zimbabwe                    | 12.9<br>(10.8-12.4) | 13.1<br>(11.3-12.6) | 13.4<br>(11.7-12.8) | 13.4<br>(12.8-13.5) | 13.3<br>(13.1-17.1) | 13.3<br>(11.8-16.5) | 13.7<br>(9.8-13.1)  | 13.7<br>(9.5-11.7)  | 14.3<br>(10.1-12.8) | 14.8<br>(11.3-13.9) |
| Western Sub-Saharan Africa  | 12.5<br>(12.6-13.2) | 12.6<br>(12.8-13.4) | 12.7<br>(13.0-13.6) | 13.0<br>(13.2-13.7) | 13.3<br>(13.0-13.6) | 13.3<br>(12.9-13.7) | 13.3<br>(13.0-13.8) | 13.5<br>(13.4-14.2) | 13.6<br>(13.9-14.7) | 13.9<br>(14.4-15.2) |
| Benin                       | 12.5<br>(12.2-12.9) | 12.6<br>(12.3-13.0) | 12.7<br>(12.3-13.1) | 13.0<br>(12.7-13.4) | 13.3<br>(13.0-13.7) | 13.3<br>(12.9-13.8) | 13.3<br>(13.0-14.0) | 13.5<br>(13.2-14.2) | 13.6<br>(13.2-14.2) | 13.9<br>(13.3-14.5) |
| Burkina Faso                | 12.0<br>(11.8-12.2) | 12.1<br>(11.9-12.3) | 12.2<br>(12.0-12.4) | 12.4<br>(12.2-12.7) | 12.3<br>(11.9-13.1) | 12.4<br>(11.8-13.3) | 12.5<br>(12.0-13.1) | 12.9<br>(13.5-13.2) | 13.0<br>(12.7-13.4) | 13.2<br>(12.9-13.6) |
| Cameroon                    | 12.0<br>(11.4-12.7) | 12.2<br>(11.6-12.9) | 12.6<br>(12.0-13.2) | 13.1<br>(12.5-13.6) | 13.3<br>(12.8-14.0) | 13.0<br>(12.3-13.9) | 12.4<br>(11.7-13.4) | 12.6<br>(11.8-13.5) | 13.1<br>(12.1-14.0) | 13.5<br>(12.4-14.7) |
| Cape Verde                  | 14.4<br>(13.5-15.6) | 14.8<br>(14.0-15.6) | 14.7<br>(14.1-15.3) | 15.1<br>(14.7-15.5) | 15.3<br>(15.0-15.7) | 15.4<br>(14.8-16.1) | 15.8<br>(14.8-16.9) | 15.9<br>(15.1-17.0) | 16.1<br>(15.7-16.7) | 16.5<br>(15.9-17.3) |
| Chad                        | 13.1<br>(12.7-13.4) | 13.2<br>(12.8-13.5) | 13.0<br>(12.6-13.4) | 13.0<br>(12.7-13.4) | 13.0<br>(12.6-13.3) | 12.8<br>(12.4-13.3) | 12.6<br>(12.1-13.2) | 13.0<br>(12.4-13.6) | 13.2<br>(12.6-13.8) | 13.8<br>(13.1-14.4) |
| Cote d'Ivoire               | 12.4<br>(11.9-12.8) | 12.5<br>(12.1-12.9) | 12.8<br>(12.3-13.2) | 12.7<br>(12.3-13.1) | 12.2<br>(11.8-12.6) | 11.7<br>(11.1-12.3) | 11.7<br>(11.0-12.4) | 11.9<br>(11.2-12.6) | 12.3<br>(11.7-12.9) | 12.8<br>(12.1-13.3) |
| The Gambia                  | 13.2<br>(12.4-14.1) | 13.4<br>(12.6-14.1) | 13.5<br>(12.9-14.2) | 13.7<br>(13.0-14.3) | 13.7<br>(13.1-14.4) | 13.8<br>(13.2-14.4) | 13.8<br>(13.2-14.4) | 14.1<br>(13.5-14.7) | 14.3<br>(13.8-15.0) | 14.7<br>(14.0-15.5) |
| Ghana                       | 12.8<br>(12.1-13.5) | 13.0<br>(12.3-13.7) | 13.0<br>(12.3-13.7) | 12.9<br>(12.2-13.7) | 12.9<br>(12.3-13.6) | 13.1<br>(12.5-14.0) | 13.0<br>(12.4-14.0) | 13.2<br>(12.6-14.1) | 13.4<br>(12.9-14.1) | 14.1<br>(13.6-15.0) |
| Guinea                      | 12.5<br>(11.8-13.3) | 12.6<br>(11.8-13.3) | 12.8<br>(12.1-13.4) | 12.9<br>(12.2-13.5) | 13.0<br>(12.5-13.5) | 12.9<br>(12.4-13.4) | 12.7<br>(12.2-13.2) | 12.8<br>(12.2-13.4) | 12.8<br>(12.2-13.6) | 13.0<br>(12.4-13.9) |
| Guinea-Bissau               | 10.8<br>(10.2-11.5) | 11.1<br>(10.5-11.8) | 11.2<br>(10.6-11.8) | 11.0<br>(10.5-11.8) | 11.0<br>(10.5-11.6) | 11.1<br>(10.5-11.6) | 11.1<br>(10.5-11.8) | 11.3<br>(10.6-12.2) | 11.4<br>(10.8-12.1) | 11.8<br>(11.2-12.4) |
| Liberia                     | 13.2<br>(12.8-13.7) | 13.4<br>(13.0-13.9) | 13.5<br>(13.0-13.9) | 13.4<br>(12.9-13.8) | 13.1<br>(12.6-13.5) | 12.8<br>(12.3-13.3) | 12.9<br>(12.3-13.6) | 13.1<br>(12.5-13.9) | 13.1<br>(12.7-13.7) | 13.6<br>(13.3-14.0) |
| Mali                        | 11.0<br>(10.2-11.8) | 11.0<br>(10.3-11.7) | 11.4<br>(10.8-12.1) | 11.7<br>(11.3-12.3) | 12.0<br>(11.5-12.5) | 12.3<br>(11.8-12.9) | 13.0<br>(12.5-13.5) | 13.7<br>(13.1-14.3) | 14.2<br>(13.5-14.9) | 14.5<br>(13.4-15.4) |
| Mauritania                  | 12.1<br>(11.0-13.3) | 12.3<br>(11.2-13.5) | 12.5<br>(11.7-13.5) | 12.6<br>(12.0-13.3) | 12.7<br>(12.2-13.3) | 13.0<br>(12.6-13.7) | 13.8<br>(13.2-14.4) | 14.5<br>(13.8-15.4) | 15.1<br>(14.2-16.2) | 15.5<br>(14.5-16.8) |
| Niger                       | 12.4<br>(11.7-13.0) | 12.2<br>(11.7-12.7) | 12.1<br>(11.6-12.6) | 12.2<br>(11.7-12.6) | 12.9<br>(12.5-13.4) | 13.1<br>(12.6-13.6) | 13.4<br>(12.9-13.8) | 13.6<br>(13.0-14.1) | 13.8<br>(13.1-14.4) | 13.8<br>(12.9-14.7) |
| Nigeria                     | 13.6<br>(12.9-14.3) | 14.1<br>(13.3-14.8) | 14.4<br>(13.7-15.1) | 14.4<br>(13.8-15.1) | 14.1<br>(13.3-14.7) | 14.0<br>(13.3-15.0) | 14.2<br>(13.3-15.2) | 14.8<br>(14.0-16.1) | 15.8<br>(14.9-17.0) | 16.6<br>(15.6-17.7) |
| Sao Tome and Principe       | 13.7<br>(13.3-14.0) | 14.1<br>(13.7-14.4) | 14.6<br>(14.2-14.9) | 14.6<br>(14.3-15.0) | 14.4<br>(13.8-14.9) | 13.9<br>(13.2-14.7) | 13.0<br>(13.1-13.8) | 13.8<br>(13.5-14.2) | 14.5<br>(14.0-15.0) | 14.9<br>(14.1-15.8) |
| Senegal                     | 12.3<br>(11.9-12.7) | 12.3<br>(11.9-12.6) | 12.5<br>(12.1-12.8) | 12.9<br>(12.5-13.3) | 12.9<br>(12.5-13.4) | 13.0<br>(12.5-13.4) | 13.0<br>(12.5-13.4) | 13.1<br>(12.8-13.6) | 13.3<br>(13.1-13.6) | 13.8<br>(13.4-14.1) |
| Sierra Leone                | 12.5<br>(12.0-13.0) | 12.7<br>(12.2-13.2) | 12.7<br>(12.3-13.2) | 12.9<br>(12.4-13.3) | 12.9<br>(12.6-13.4) | 13.0<br>(12.4-13.1) | 12.8<br>(12.0-12.8) | 12.4<br>(11.7-12.7) | 12.4<br>(11.9-12.9) | 12.4<br>(12.4-13.6) |
| Togo                        | 12.8<br>(12.3-13.3) | 13.0<br>(12.5-13.5) | 13.1<br>(12.6-13.6) | 13.0<br>(12.5-13.4) | 12.9<br>(12.4-13.4) | 12.8<br>(12.4-13.4) | 12.7<br>(12.0-13.7) | 12.7<br>(12.0-13.8) | 12.7<br>(12.3-13.8) | 13.0<br>(12.7-14.1) |
| Eastern Sub-Saharan Africa  | 11.0<br>(10.7-11.2) | 11.1<br>(10.9-11.4) | 11.3<br>(11.0-11.5) | 11.3<br>(11.1-11.5) | 11.3<br>(11.1-11.5) | 11.3<br>(11.1-11.5) | 11.5<br>(11.3-11.8) | 11.5<br>(11.9-12.4) | 12.2<br>(12.6-13.1) | 12.9<br>(13.1-13.8) |
| Burundi                     | 9.7<br>(9.2-10.2)   | 9.7<br>(9.2-10.2)   | 9.6<br>(9.1-10.2)   | 9.4<br>(8.8-10.0)   | 9.4<br>(8.8-10.1)   | 9.5<br>(8.8-10.1)   | 9.8                 |                     |                     |                     |

Appendix Table 14A. Estimates of life expectancy at age 65 by location, both sexes, 1970, 1975, 1980, 1985, 1990, 1995, 2000, 2005, 2010, 2016

| Location                         | 1970                | 1975                | 1980                | 1985                | 1990                | 1995                | 2000                | 2005                | 2010                | 2016                |
|----------------------------------|---------------------|---------------------|---------------------|---------------------|---------------------|---------------------|---------------------|---------------------|---------------------|---------------------|
| Djibouti                         | 13.9<br>(13.5-14.3) | 14.1<br>(13.6-14.5) | 14.0<br>(13.5-14.5) | 13.9<br>(13.4-14.3) | 13.9<br>(13.6-14.3) | 13.8<br>(13.4-14.3) | 13.9<br>(13.0-14.8) | 13.9<br>(12.8-15.0) | 14.1<br>(13.1-15.3) | 14.6<br>(13.6-16.2) |
| Eritrea                          | 9.5<br>(9.1-9.9)    | 9.6<br>(9.2-10.1)   | 9.8<br>(9.4-10.2)   | 9.9<br>(9.6-10.3)   | 10.4<br>(10.0-10.8) | 11.4<br>(10.9-11.9) | 11.9<br>(11.4-12.5) | 12.2<br>(11.6-12.8) | 12.3<br>(11.7-12.9) | 12.6<br>(11.9-13.3) |
| Ethiopia                         | 9.2<br>(8.6-9.9)    | 9.1<br>(8.6-9.8)    | 9.2<br>(8.7-9.8)    | 9.3<br>(8.9-9.7)    | 9.7<br>(9.3-10.1)   | 10.2<br>(9.9-10.6)  | 10.8<br>(10.4-11.3) | 11.7<br>(11.2-12.2) | 12.6<br>(11.9-13.2) | 13.3<br>(12.4-14.1) |
| Kenya                            | 12.9<br>(12.7-13.2) | 13.3<br>(13.0-13.5) | 13.6<br>(13.4-13.9) | 13.7<br>(13.5-14.0) | 13.6<br>(13.3-13.8) | 13.2<br>(12.8-13.5) | 13.0<br>(12.7-13.3) | 13.4<br>(13.2-13.7) | 14.2<br>(13.9-14.5) | 14.8<br>(14.5-15.1) |
| Madagascar                       | 10.5<br>(10.0-10.9) | 11.3<br>(10.8-11.8) | 12.2<br>(11.7-12.8) | 12.1<br>(11.6-12.5) | 12.0<br>(11.7-12.4) | 12.2<br>(11.8-12.6) | 12.3<br>(11.9-12.7) | 12.6<br>(12.1-13.2) | 12.8<br>(12.1-13.8) | 13.1<br>(12.0-14.3) |
| Malawi                           | 12.3<br>(11.7-12.8) | 12.6<br>(12.1-13.0) | 12.9<br>(12.4-13.3) | 12.9<br>(12.3-13.5) | 12.6<br>(11.4-14.2) | 11.6<br>(10.4-13.7) | 11.3<br>(9.9-13.4)  | 11.9<br>(10.4-13.8) | 12.8<br>(11.6-14.5) | 13.5<br>(12.4-14.9) |
| Mozambique                       | 11.9<br>(11.4-12.4) | 12.2<br>(11.7-12.6) | 12.3<br>(11.8-12.7) | 11.6<br>(11.2-12.1) | 12.3<br>(11.9-12.7) | 12.5<br>(11.9-13.3) | 12.7<br>(11.6-13.9) | 13.3<br>(11.8-14.4) | 13.6<br>(12.1-14.7) | 14.0<br>(12.8-15.0) |
| Rwanda                           | 10.8<br>(10.1-11.6) | 11.0<br>(10.3-11.8) | 11.2<br>(10.6-12.0) | 11.2<br>(10.7-11.9) | 10.4<br>(9.8-11.0)  | 9.5<br>(9.1-10.1)   | 10.9<br>(10.4-11.5) | 13.3<br>(12.6-14.0) | 14.3<br>(13.5-15.1) | 14.7<br>(13.9-15.6) |
| Somalia                          | 10.7<br>(10.0-11.4) | 10.5<br>(9.9-11.2)  | 10.9<br>(10.2-11.5) | 10.8<br>(10.1-11.4) | 10.8<br>(10.1-11.4) | 10.7<br>(10.0-11.4) | 10.6<br>(10.0-11.3) | 10.8<br>(10.1-11.5) | 10.9<br>(10.1-11.6) | 11.3<br>(10.4-12.0) |
| South Sudan                      | 12.7<br>(11.8-13.4) | 12.8<br>(11.9-13.6) | 12.9<br>(12.0-13.7) | 12.8<br>(11.9-13.7) | 12.6<br>(11.6-13.7) | 12.4<br>(11.3-13.7) | 12.3<br>(11.3-13.9) | 12.7<br>(11.6-14.2) | 12.9<br>(11.8-14.5) | 12.9<br>(11.8-14.3) |
| Tanzania                         | 12.6<br>(12.1-13.1) | 13.0<br>(12.4-13.5) | 13.3<br>(12.7-13.8) | 13.2<br>(12.7-13.8) | 12.5<br>(12.0-13.3) | 12.2<br>(11.5-13.3) | 12.3<br>(11.6-13.6) | 12.9<br>(12.1-14.0) | 13.4<br>(12.7-14.5) | 13.9<br>(13.1-15.0) |
| Uganda                           | 11.1<br>(10.7-11.6) | 11.3<br>(10.9-11.7) | 11.2<br>(10.8-11.6) | 11.3<br>(11.0-11.7) | 11.1<br>(10.6-11.8) | 11.0<br>(10.2-12.0) | 11.2<br>(10.7-11.9) | 11.8<br>(11.2-12.3) | 12.6<br>(12.0-13.4) | 13.2<br>(12.5-14.2) |
| Zambia                           | 13.4<br>(11.7-15.1) | 13.7<br>(12.2-15.1) | 13.8<br>(12.6-14.9) | 13.8<br>(12.6-15.2) | 12.7<br>(11.8-13.9) | 10.7<br>(10.0-11.5) | 9.8<br>(9.1-10.8)   | 9.8<br>(9.2-11.1)   | 10.9<br>(10.0-11.9) | 12.1<br>(10.9-13.6) |
| Central Sub-Saharan Africa       | 11.3<br>(10.9-11.6) | 11.4<br>(11.1-11.8) | 11.5<br>(11.1-11.8) | 11.5<br>(11.2-11.9) | 11.5<br>(11.2-11.9) | 11.4<br>(11.1-11.8) | 11.5<br>(11.1-11.8) | 11.8<br>(11.4-12.1) | 12.1<br>(11.8-12.5) | 12.8<br>(12.5-13.2) |
| Angola                           | 11.2<br>(10.1-12.6) | 11.4<br>(10.2-12.7) | 11.3<br>(10.1-12.6) | 11.1<br>(10.0-12.5) | 10.9<br>(9.8-12.3)  | 10.9<br>(9.7-12.3)  | 11.3<br>(10.1-12.6) | 11.8<br>(10.6-13.3) | 12.6<br>(11.2-14.2) | 13.5<br>(11.8-14.9) |
| Central African Republic         | 9.8<br>(9.1-10.7)   | 9.9<br>(9.3-10.7)   | 10.1<br>(9.6-10.8)  | 10.2<br>(9.8-10.8)  | 9.8<br>(9.3-10.3)   | 9.5<br>(8.9-10.3)   | 9.4<br>(8.6-10.4)   | 9.5<br>(8.7-10.6)   | 9.9<br>(9.0-11.0)   | 10.1<br>(9.2-11.3)  |
| Congo                            | 9.6<br>(8.8-10.5)   | 9.8<br>(9.0-10.8)   | 10.0<br>(9.2-10.9)  | 10.2<br>(9.6-11.1)  | 10.1<br>(9.6-10.8)  | 10.1<br>(9.6-10.7)  | 10.6<br>(10.0-11.3) | 11.7<br>(11.1-12.4) | 12.4<br>(11.7-13.2) | 13.0<br>(12.0-14.2) |
| Democratic Republic of the Congo | 11.7<br>(11.4-12.2) | 11.9<br>(11.5-12.3) | 11.8<br>(11.4-12.3) | 12.0<br>(11.6-12.4) | 12.1<br>(11.7-12.5) | 11.9<br>(11.6-12.3) | 11.8<br>(11.5-12.2) | 12.0<br>(11.6-12.3) | 12.1<br>(11.8-12.5) | 12.8<br>(12.5-13.2) |
| Equatorial Guinea                | 9.4<br>(8.6-10.6)   | 9.6<br>(8.8-10.7)   | 9.9<br>(9.0-11.2)   | 10.1<br>(9.2-11.4)  | 10.0<br>(9.1-11.2)  | 10.3<br>(9.3-11.5)  | 12.2<br>(10.8-14.2) | 13.9<br>(11.8-16.5) | 14.7<br>(12.4-17.3) | 15.5<br>(13.2-18.7) |
| Gabon                            | 11.1<br>(10.1-12.3) | 11.5<br>(10.5-12.9) | 11.9<br>(11.0-12.9) | 11.9<br>(11.2-12.9) | 11.7<br>(11.2-12.4) | 11.9<br>(11.3-12.5) | 12.0<br>(11.2-12.7) | 12.4<br>(11.7-13.1) | 13.4<br>(12.6-14.1) | 14.3<br>(13.2-15.3) |

Appendix Table 14B. Estimates of life expectancy at age 65 by location, males, 1970, 1975, 1980, 1985, 1990, 1995, 2000, 2005, 2010, 2016

| Location                  | 1970                | 1975                | 1980                | 1985                | 1990                | 1995                | 2000                | 2005                | 2010                | 2016                |
|---------------------------|---------------------|---------------------|---------------------|---------------------|---------------------|---------------------|---------------------|---------------------|---------------------|---------------------|
| Global                    | 12.5<br>(12.4-12.5) | 12.7<br>(12.7-12.8) | 12.9<br>(12.8-13.0) | 13.1<br>(13.1-13.2) | 13.3<br>(13.3-13.4) | 13.5<br>(13.4-13.6) | 13.9<br>(13.8-14.0) | 14.5<br>(14.4-14.5) | 15.1<br>(15.1-15.2) | 15.7<br>(15.6-15.8) |
| High SDI                  | 12.7<br>(13.0-12.8) | 13.1<br>(13.0-13.2) | 13.6<br>(13.6-13.7) | 14.1<br>(14.1-14.2) | 14.8<br>(14.7-14.8) | 15.3<br>(15.3-15.4) | 16.1<br>(16.0-16.1) | 17.0<br>(17.0-17.1) | 17.9<br>(17.8-17.9) | 18.4<br>(18.2-18.5) |
| High-middle SDI           | 12.9<br>(12.7-13.1) | 13.1<br>(12.9-13.2) | 12.9<br>(12.8-13.1) | 13.2<br>(13.0-13.4) | 13.4<br>(13.2-13.6) | 13.0<br>(12.8-13.2) | 13.5<br>(13.3-13.7) | 14.0<br>(13.8-14.2) | 15.1<br>(14.9-15.3) | 15.9<br>(15.4-16.3) |
| Middle SDI                | 12.9<br>(12.8-13.0) | 13.0<br>(12.9-13.2) | 12.8<br>(12.7-12.9) | 12.9<br>(12.8-13.0) | 12.7<br>(12.6-12.9) | 13.0<br>(12.9-13.1) | 13.3<br>(13.2-13.5) | 13.9<br>(13.8-14.0) | 14.5<br>(14.4-14.6) | 15.1<br>(14.9-15.2) |
| Low-middle SDI            | 11.3<br>(11.1-11.5) | 11.6<br>(11.4-11.7) | 11.9<br>(11.8-12.1) | 12.2<br>(12.0-12.3) | 12.3<br>(12.2-12.5) | 12.5<br>(12.3-12.6) | 12.7<br>(12.5-12.8) | 13.1<br>(12.9-13.2) | 13.4<br>(13.3-13.6) | 13.9<br>(13.7-14.1) |
| Low SDI                   | 11.2<br>(11.0-11.5) | 11.4<br>(11.1-11.6) | 11.5<br>(11.2-11.8) | 11.6<br>(11.4-11.9) | 11.7<br>(11.5-12.0) | 11.9<br>(11.6-12.1) | 12.0<br>(11.8-12.3) | 12.4<br>(12.2-12.6) | 12.7<br>(12.4-13.0) | 13.3<br>(12.9-13.6) |
| High-income               | 12.8<br>(12.7-12.8) | 13.2<br>(13.1-13.2) | 13.8<br>(13.7-13.9) | 14.3<br>(14.2-14.3) | 15.0<br>(14.9-15.0) | 15.5<br>(15.4-15.5) | 16.2<br>(16.2-16.3) | 17.1<br>(17.1-17.2) | 18.0<br>(17.9-18.0) | 18.5<br>(18.3-18.6) |
| High-income North America | 13.1<br>(13.0-13.2) | 13.6<br>(13.6-13.7) | 14.3<br>(14.2-14.3) | 14.6<br>(14.5-14.7) | 15.2<br>(15.1-15.2) | 15.5<br>(15.5-15.6) | 16.2<br>(16.1-16.3) | 17.1<br>(17.0-17.2) | 18.0<br>(17.9-18.0) | 18.2<br>(18.1-18.3) |
| Canada                    | 13.8<br>(13.6-14.0) | 14.0<br>(13.8-14.2) | 14.6<br>(14.4-14.8) | 15.0<br>(14.8-15.2) | 15.5<br>(15.3-15.7) | 15.9<br>(15.7-16.1) | 16.7<br>(16.5-16.9) | 17.7<br>(17.5-17.9) | 18.7<br>(18.5-18.9) | 19.1<br>(18.8-19.4) |
| Greenland                 | 10.1<br>(9.7-10.6)  | 9.7<br>(9.3-10.1)   | 9.1<br>(8.7-9.5)    | 8.9<br>(8.6-9.3)    | 8.9<br>(8.5-9.4)    | 9.7<br>(9.3-10.1)   | 10.2<br>(9.8-10.6)  | 10.3<br>(9.9-10.7)  | 11.4<br>(10.8-11.9) | 11.9<br>(10.6-13.3) |
| United States             | 13.0<br>(13.0-13.1) | 13.6<br>(13.5-13.7) | 14.2<br>(14.2-14.3) | 14.6<br>(14.5-14.6) | 15.1<br>(15.1-15.2) | 15.5<br>(15.4-15.6) | 16.1<br>(16.1-16.2) | 17.0<br>(17.0-17.1) | 17.9<br>(17.8-18.0) | 18.1<br>(17.9-18.2) |
| Australasia               | 12.3<br>(12.2-12.4) | 13.0<br>(12.8-13.1) | 13.7<br>(13.5-13.8) | 14.2<br>(14.1-14.4) | 15.1<br>(15.0-15.3) | 15.9<br>(15.7-16.0) | 17.0<br>(16.9-17.2) | 18.2<br>(18.0-18.3) | 19.0<br>(18.8-19.1) | 19.4<br>(18.9-19.8) |
| Australia                 | 12.2<br>(12.1-12.4) | 13.0<br>(12.8-13.1) | 13.8<br>(13.6-13.9) | 14.4<br>(14.2-14.5) | 15.2<br>(15.0-15.4) | 15.9<br>(15.8-16.1) | 17.1<br>(16.9-17.3) | 18.2<br>(18.1-18.4) | 19.0<br>(18.9-19.2) | 19.5<br>(18.9-20.0) |
| New Zealand               | 12.6<br>(12.4-12.8) | 12.9<br>(12.7-13.1) | 13.2<br>(13.0-13.4) | 13.7<br>(13.5-13.9) | 14.7<br>(14.5-14.9) | 15.4<br>(15.2-15.6) | 16.5<br>(16.3-16.7) | 17.7<br>(17.5-17.9) | 18.6<br>(18.4-18.8) | 18.9<br>(18.1-19.8) |
| High-income Asia Pacific  | 12.4<br>(12.0-12.7) | 13.2<br>(12.9-13.5) | 14.1<br>(14.0-14.2) | 15.0<br>(14.8-15.1) | 15.7<br>(15.5-15.8) | 16.2<br>(16.1-16.3) | 17.0<br>(16.9-17.1) | 17.8<br>(17.7-17.9) | 18.4<br>(18.3-18.6) | 19.2<br>(18.8-19.6) |
| Brunei                    | 13.8<br>(13.2-14.8) | 14.4<br>(13.4-15.1) | 13.3<br>(12.7-15.5) | 14.0<br>(13.7-14.3) | 14.5<br>(14.3-14.8) | 15.1<br>(14.7-15.5) | 15.7<br>(15.3-16.1) | 15.8<br>(15.5-16.2) | 15.9<br>(15.6-16.3) | 15.9<br>(15.1-17.4) |
| Japan                     | 12.7<br>(12.0-12.9) | 13.7<br>(13.6-13.9) | 14.7<br>(14.7-14.7) | 15.6<br>(15.6-15.6) | 16.2<br>(16.2-16.3) | 16.6<br>(16.6-16.7) | 17.4<br>(17.4-17.4) | 18.1<br>(18.1-18.1) | 18.7<br>(18.7-18.7) | 19.5<br>(19.4-19.7) |
| Singapore                 | 10.7<br>(9.9-11.5)  | 11.3<br>(10.6-12.1) | 11.9<br>(11.4-13.1) | 12.5<br>(12.2-14.1) | 13.2<br>(13.7-15.6) | 14.0<br>(14.5-16.4) | 14.7<br>(15.7-18.0) | 15.5<br>(16.9-18.8) | 16.9<br>(18.0-20.0) | 17.9<br>(17.9-21.5) |
| South Korea               | 10.3<br>(8.6-12.8)  | 10.0<br>(8.8-11.4)  | 10.6<br>(9.9-11.4)  | 11.4<br>(10.7-12.1) | 12.4<br>(11.7-13.1) | 13.5<br>(12.8-14.4) | 14.6<br>(13.9-15.3) | 15.6<br>(15.2-16.8) | 17.0<br>(16.3-17.9) | 17.5<br>(15.5-20.1) |
| Western Europe            | 12.7<br>(12.6-12.8) | 12.9<br>(12.8-13.0) | 13.5<br>(13.4-13.6) | 14.0<br>(13.9-14.1) | 14.7<br>(14.6-14.8) | 15.3<br>(15.2-15.4) | 16.1<br>(16.0-16.2) | 17.0<br>(16.9-17.1) | 17.9<br>(17.8-18.0) | 18.5<br>(18.3-18.7) |
| Andorra                   | 15.0<br>(12.7-17.3) | 15.3<br>(14.0-17.9) | 16.0<br>(15.0-17.8) | 16.3<br>(15.3-18.1) | 17.2<br>(15.6-18.0) | 17.8<br>(16.0-18.3) | 18.3<br>(16.9-19.0) | 18.5<br>(17.5-19.2) | 18.5<br>(17.6-19.6) | 18.5<br>(17.4-20.1) |
| Austria                   | 11.8<br>(11.6-11.9) | 12.3<br>(12.1-12.4) | 12.9<br>(12.7-13.0) | 13.6<br>(13.4-13.7) | 14.4<br>(14.2-14.5) | 15.0<br>(14.8-15.2) | 15.9<br>(15.8-16.1) | 17.0<br>(16.8-17.1) | 17.7<br>(17.6-17.9) | 18.4<br>(18.0-18.9) |
| Belgium                   | 12.1<br>(11.9-12.4) | 12.4<br>(12.1-12.6) | 12.8<br>(12.6-13.1) | 13.4<br>(13.1-13.6) | 14.3<br>(14.0-14.6) | 14.8<br>(14.6-15.1) | 15.6<br>(15.3-15.9) | 16.6<br>(16.3-16.9) | 17.4<br>(17.1-17.7) | 18.0<br>(17.2-18.7) |
| Cyprus                    | 12.2<br>(11.9-12.7) | 12.3<br>(11.6-12.4) | 12.6<br>(12.3-12.9) | 13.5<br>(13.2-13.8) | 14.0<br>(13.7-14.4) | 14.6<br>(14.2-14.9) | 15.4<br>(15.1-15.7) | 16.1<br>(15.8-16.5) | 17.1<br>(16.8-17.5) | 17.4<br>(17.0-17.9) |
| Denmark                   | 13.7<br>(13.2-14.2) | 13.8<br>(13.4-14.3) | 14.0<br>(13.3-14.2) | 14.3<br>(13.6-14.5) | 14.3<br>(13.8-14.8) | 14.3<br>(13.9-14.8) | 15.2<br>(14.7-15.7) | 16.1<br>(15.6-16.6) | 17.1<br>(16.7-17.6) | 18.0<br>(17.0-18.9) |
| Finland                   | 11.4<br>(11.3-11.6) | 12.0<br>(11.9-12.2) | 12.7<br>(12.5-12.9) | 13.2<br>(13.0-13.4) | 13.8<br>(13.6-14.0) | 14.6<br>(14.4-14.8) | 15.5<br>(15.3-15.7) | 16.6<br>(16.4-16.8) | 17.3<br>(17.1-17.6) | 18.4<br>(17.8-19.0) |
| France                    | 13.1<br>(12.9-13.3) | 13.4<br>(13.2-13.6) | 14.1<br>(13.9-14.3) | 14.7<br>(14.6-15.0) | 15.7<br>(15.5-15.9) | 16.2<br>(16.0-16.4) | 17.7<br>(16.6-17.0) | 17.7<br>(17.5-17.9) | 18.6<br>(18.4-18.8) | 19.2<br>(18.9-19.6) |
| Germany                   | 12.0<br>(11.7-12.4) | 12.2<br>(11.9-12.6) | 12.8<br>(12.5-13.2) | 13.3<br>(13.0-13.7) | 14.0<br>(13.7-14.4) | 14.7<br>(14.3-15.0) | 15.6<br>(15.2-15.9) | 16.6<br>(16.2-16.9) | 17.3<br>(17.0-17.7) | 17.9<br>(17.3-18.6) |
| Greece                    | 14.9<br>(14.7-15.1) | 15.3<br>(15.0-15.5) | 17.4<br>(17.1-17.6) | 15.5<br>(15.3-15.7) | 15.5<br>(15.4-15.8) | 16.0<br>(15.8-16.2) | 16.5<br>(16.3-16.7) | 17.2<br>(17.0-17.5) | 17.3<br>(17.1-18.1) | 18.3<br>(17.7-19.0) |
| Iceland                   | 14.7<br>(14.4-15.0) | 15.3<br>(15.0-15.5) | 15.8<br>(15.4-16.1) | 16.2<br>(15.5-16.1) | 16.6<br>(15.8-16.5) | 17.3<br>(16.2-16.9) | 18.2<br>(16.9-17.6) | 18.7<br>(17.9-18.6) | 19.0<br>(18.4-19.0) | 19.0<br>(18.4-19.6) |
| Ireland                   | 12.4<br>(12.0-12.8) | 12.4<br>(12.1-12.8) | 12.5<br>(12.1-12.9) | 12.8<br>(12.4-13.2) | 13.4<br>(13.0-13.8) | 13.8<br>(13.5-14.2) | 14.6<br>(14.3-15.0) | 15.6<br>(16.0-16.8) | 16.6<br>(17.2-18.0) | 17.6<br>(17.1-19.1) |
| Israel                    | 13.0<br>(12.3-13.8) | 13.6<br>(12.8-14.4) | 14.1<br>(13.3-15.0) | 14.7<br>(13.7-15.3) | 15.1<br>(14.4-15.9) | 15.7<br>(14.8-16.3) | 16.6<br>(15.9-17.6) | 17.4<br>(16.7-18.2) | 18.6<br>(17.8-19.3) | 19.9<br>(17.4-20.5) |
| Italy                     | 13.2<br>(13.0-13.4) | 13.2<br>(13.0-13.4) | 13.6<br>(13.4-13.8) | 14.3<br>(14.1-14.4) | 15.1<br>(14.9-15.2) | 15.7<br>(15.5-15.9) | 16.5<br>(16.4-16.7) | 17.4<br>(17.2-17.6) | 18.1<br>(17.9-18.2) | 18.6<br>(18.1-19.1) |
| Luxembourg                | 11.8<br>(11.5-12.0) | 11.8<br>(11.9-12.4) | 12.5<br>(12.1-12.8) | 13.2<br>(12.9-13.4) | 14.0<br>(13.7-14.3) | 14.8<br>(14.6-15.1) | 15.8<br>(15.5-16.1) | 17.1<br>(16.8-17.5) | 18.2<br>(18.1-18.5) | 18.9<br>(18.2-19.7) |
| Malta                     | 11.6<br>(11.1-12.2) | 11.9<br>(11.3-12.5) | 12.1<br>(11.5-12.7) | 13.2<br>(12.6-13.9) | 14.3<br>(13.6-15.0) | 14.9<br>(14.2-15.6) | 15.0<br>(14.4-15.7) | 16.4<br>(15.8-17.1) | 17.4<br>(16.7-18.0) | 18.0<br>(16.8-19.4) |
| Netherlands               | 13.6<br>(13.3-13.9) | 13.7<br>(13.3-14.0) | 14.0<br>(13.6-14.3) | 14.1<br>(13.7-14.4) | 14.4<br>(14.1-14.7) | 14.8<br>(14.5-15.1) | 15.3<br>(15.0-15.7) | 16.4<br>(16.1-16.7) | 17.6<br>(17.2-17.9) | 18.1<br>(17.4-18.8) |
| Norway                    | 13.8<br>(13.5-14.1) | 14.1<br>(13.8-14.4) | 14.3<br>(14.0-14.6) | 14.4<br>(14.1-14.7) | 14.8<br>(14.5-15.1) | 15.3<br>(15.0-15.6) | 16.1<br>(15.7-16.4) | 17.2<br>(16.9-17.5) | 17.9<br>(17.6-18.2) | 18.7<br>(19.0-19.5) |
| Portugal                  | 12.2<br>(12.0-12.4) | 12.8<br>(12.5-13.0) | 13.3<br>(13.0-13.5) | 13.8<br>(13.6-14.0) | 14.3<br>(14.0-14.5) | 14.7<br>(14.5-14.9) | 15.3<br>(15.1-15.6) | 16.3<br>(16.0-16.5) | 17.2<br>(17.0-17.4) | 17.8<br>(17.3-18.4) |
| Spain                     | 13.3<br>(13.1-13.4) | 13.7<br>(13.5-13.8) | 14.6<br>(14.4-14.7) | 15.0<br>(14.9-15.2) | 15.6<br>(15.4-15.7) | 16.1<br>(15.9-16.2) | 16.6<br>(16.5-16.8) | 17.3<br>(17.2-17.5) | 18.3<br>(18.2-18.5) | 19.2<br>(18.8-19.6) |
| Sweden                    | 14.1<br>(13.7-14.5) | 14.0<br>(13.7-14.4) | 14.3<br>(14.0-14.5) | 14.8<br>(14.5-15.0) | 15.3<br>(15.1-15.6) | 16.0<br>(15.8-16.2) | 16.7<br>(16.4-16.9) | 17.4<br>(17.1-17.6) | 18.2<br>(18.0-18.5) | 18.6<br>(17.7-19.5) |
| Stockholm                 | 14.0<br>(12.3-15.8) | 13.8<br>(12.6-15.1) | 14.0<br>(13.5-14.5) | 14.5<br>(14.2-15.0) | 15.1<br>(14.6-15.5) | 15.9<br>(15.5-16.2) | 16.6<br>(16.3-17.0) | 17.5<br>(17.1-17.9) | 18.3<br>(18.0-18.8) | 18.7<br>(17.1-20.3) |
| Sweden except Stockholm   | 14.1<br>(13.7-14.5) | 14.1<br>(13.7-14.4) | 14.3<br>(14.1-14.6) | 14.8<br>(14.5-15.1) | 15.4<br>(15.1-15.7) | 16.0<br>(15.7-16.3) | 16.7<br>(16.4-17.0) | 17.4<br>(17.1-17.6) | 18.2<br>(17.9-18.5) | 18.6<br>(17.6-19.6) |
| Switzerland               | 13.2<br>(12.8-13.7) | 13.9<br>(13.4-14.4) | 14.3<br>(13.9-14.8) | 15.0<br>(14.5-15.5) | 15.4<br>(14.9-15.8) | 16.1<br>(15.6-16.5) | 17.0<br>(16.6-17.5) | 18.0<br>(17.5-18.5) | 18.8<br>(18.4-19.3) | 19.5<br>(17.5-21.3) |
| United Kingdom            | 12.1<br>(12.0-12.2) | 12.4<br>(12.2-12.5) | 12.8<br>(12.8-12.9) | 13.3<br>(13.2-13.3) | 14.0<br>(13.9-14.1) | 14.6<br>(14.5-14.7) | 15.6<br>(15.5-15.7) | 16.8<br>(16.7-16.9) | 17.9<br>(17.9-18.0) | 18.3<br>(18.1-18.4) |
| England                   | 12.2<br>(12.1-12.3) | 12.4<br>(12.3-12.5) | 12.9<br>(12.9-13.0) | 13.4<br>(13.3-13.4) | 14.1<br>(14.1-14.2) | 14.7<br>(14.7-14.8) | 15.7<br>(15.7-15.8) | 16.9<br>(16.9-17.0) | 18.1<br>(18.0-18.2) | 18.4<br>(18.3-18.5) |
| East Midlands             | 12.1<br>(11.7-12.6) | 12.4<br>(12.0-12.8) | 12.9<br>(12.6-13.2) | 13.4<br>(13.2-13.6) | 14.1<br>(13.9-14.3) | 14.6<br>(14.4-14.8) | 15.8<br>(15.6-16.0) | 16.8<br>(16.6-17.0) | 17.9<br>(17.7-18.1) | 18.3<br>(18.0-18.6) |
| East of England           | 12.6<br>(12.2-13.1) | 12.9<br>(12.5-13.2) | 13.4<br>(13.1-13.7) | 13.9<br>(13.7-14.1) | 14.7<br>(14.5-14.9) | 15.3<br>(15.1-15.5) | 16.2<br>(16.0-16.5) | 17.5<br>(17.3-17.7) | 18.6<br>(18.4-18.9) | 18.9<br>(18.6-19.3) |
| Greater London            | 12.5<br>(12.3-12.7) | 12.7<br>(12.5-12.9) | 13.1<br>(12.9-13.2) | 13.5<br>(13.4-13.6) | 14.3<br>(14.2-14.4) | 14.9<br>(14.8-15.0) | 15.8<br>(15.6-15.9) | 17.0<br>(16.8-17.1) | 18.3<br>(18.2-18.4) | 18.6<br>(18.4-18.9) |
| North East England        | 11.3<br>(10.9-11.6) | 11.5<br>(11.2-11.8) | 12.0<br>(11.8-12.2) | 12.4<br>(12.2-12.6) | 13.0<br>(12.8-13.2) | 13.5<br>(13.4-13.7) | 14.7<br>(14.5-14.9) | 15.9<br>(15.7-16.1) | 17.2<br>(17.0-17.4) | 17.6<br>(17.3-17.9) |
| North West England        | 11.5<br>(11.5-11.8) | 11.8<br>(11.5-12.0) | 12.3<br>(12.1-12.4) | 12.7<br>(12.5-12.8) | 13.3<br>(13.2-13.5) | 14.0<br>(13.8-14.1) | 15.0<br>(14.9-15.2) | 16.2<br>(16.0-16.3) | 17.3<br>(17.2-17.5) | 17.7<br>(17.5-18.0) |
| South East England        | 12.4<br>(12.5-13.2) | 13.1<br>(12.7-13.4) | 13.6<br>(13.3-13.8) | 14.0<br>(13.8-14.1) | 14.9<br>(14.6-15.0) | 15.4<br>(15.2-15.5) | 16.4<br>(16.2-16.6) | 17.6<br>(17.4-17.8) | 18.7<br>(18.5-18.9) | 19.0<br>(18.7-19.2) |
| South West England        | 13.0<br>(12.6-13.4) | 13.2<br>(12.9-13.5) | 13.7<br>(13.5-13.9) | 14.2<br>(14.0-14.4) | 14.7<br>(14.7-15.0) | 15.5<br>(15.4-15.7) | 16.5<br>(16.3-16.6) | 17.6<br>(17.5-17.8) | 18.7<br>(18.5-18.8) | 19.0<br>(18.7-19.2) |
| West Midlands             | 11.8<br>(11.5-12.2) | 12.1<br>(11.7-12.4) | 12.5<br>(12.3-12.7) | 13.0<br>(12.8-13.2) | 13.7<br>(13.5-13.9) | 14.4<br>(14.2-14.6) | 15.4<br>(15.2-15.6) | 16.4<br>(16.4-16.8) | 17.4<br>(17.7-18.1) | 17.9<br>(17.9-18.5) |
| Yorkshire and the Humber  | 11.7<br>(11.4-12.1) | 12.0<br>(11.7-12.3) | 12.5<br>(12.3-12.7) | 12.9<br>(12.7-13.1) | 13.5<br>(13.5-13.8) | 14.3<br>(14.2-14.5) | 15.3<br>(15.1-15.4) | 16.3<br>(16.4-16.8) | 17.3<br>(17.4-17.7) | 17.9<br>(17.7-18.2) |
| Northern Ireland          | 12.1<br>(11.7-12.5) | 12.3<br>(11.8-12.7) | 12.4<br>(12.1-12.9) | 12.9<br>(12.3-13.6) | 13.5<br>(13.0-14.2) | 14.3<br>(13.7-14.9) |                     |                     |                     |                     |

Appendix Table 14B. Estimates of life expectancy at age 65 by location, males, 1970, 1975, 1980, 1985, 1990, 1995, 2000, 2005, 2010, 2016

| Location                                         | 1970                | 1975                | 1980                | 1985                | 1990                | 1995                | 2000                | 2005                | 2010                | 2016                |
|--------------------------------------------------|---------------------|---------------------|---------------------|---------------------|---------------------|---------------------|---------------------|---------------------|---------------------|---------------------|
| Wales                                            | 11.7<br>(10.7-12.8) | 12.0<br>(11.0-13.0) | 12.5<br>(11.8-13.3) | 13.1<br>(12.6-13.7) | 13.7<br>(13.1-14.2) | 14.4<br>(13.8-14.9) | 15.4<br>(14.8-16.0) | 16.6<br>(16.0-17.1) | 17.6<br>(16.9-18.2) | 17.7<br>(16.7-18.7) |
| Southern Latin America                           | 12.9<br>(12.6-13.2) | 13.4<br>(13.0-13.8) | 13.5<br>(13.3-13.7) | 13.8<br>(13.6-14.0) | 14.0<br>(13.8-14.3) | 14.4<br>(14.2-14.7) | 14.8<br>(14.6-15.0) | 15.2<br>(15.0-15.5) | 15.6<br>(15.4-15.9) | 16.1<br>(15.5-16.8) |
| Argentina                                        | 12.7<br>(12.3-13.0) | 13.2<br>(12.6-13.7) | 13.3<br>(13.1-13.6) | 13.7<br>(13.4-14.0) | 13.9<br>(13.6-14.2) | 14.3<br>(14.0-14.6) | 14.4<br>(14.1-14.7) | 14.7<br>(14.4-15.0) | 15.1<br>(14.9-15.4) | 15.6<br>(14.9-16.2) |
| Chile                                            | 13.7<br>(13.3-14.3) | 14.4<br>(13.9-14.9) | 14.3<br>(13.8-14.8) | 14.2<br>(13.7-14.7) | 14.7<br>(14.2-15.2) | 15.2<br>(14.8-15.8) | 16.2<br>(15.6-16.7) | 16.9<br>(16.4-17.4) | 17.3<br>(16.9-17.8) | 17.9<br>(15.9-20.0) |
| Uruguay                                          | 13.0<br>(12.8-13.2) | 13.2<br>(13.0-13.4) | 13.4<br>(13.1-13.6) | 13.5<br>(13.3-13.7) | 13.7<br>(13.5-13.9) | 13.8<br>(13.6-14.0) | 14.4<br>(14.2-14.6) | 14.7<br>(14.4-14.9) | 15.0<br>(14.8-15.3) | 15.5<br>(15.0-16.1) |
| Central Europe, Eastern Europe, and Central Asia | 12.4<br>(12.2-12.7) | 12.4<br>(12.2-12.7) | 12.2<br>(11.9-12.4) | 12.2<br>(12.0-12.4) | 12.4<br>(12.2-12.7) | 11.6<br>(11.3-11.9) | 12.0<br>(11.7-12.3) | 12.1<br>(11.9-12.4) | 13.1<br>(12.9-13.4) | 14.1<br>(13.2-15.0) |
| Eastern Europe                                   | 12.4<br>(12.0-12.9) | 12.2<br>(11.8-12.6) | 11.9<br>(11.5-12.3) | 11.9<br>(11.5-12.2) | 12.2<br>(11.8-12.7) | 10.9<br>(10.4-11.4) | 11.1<br>(10.7-11.6) | 11.2<br>(10.8-11.7) | 12.3<br>(11.9-12.8) | 13.3<br>(11.9-14.9) |
| Belarus                                          | 14.1<br>(13.7-14.4) | 13.8<br>(13.5-14.2) | 13.2<br>(12.8-13.6) | 13.0<br>(12.6-13.3) | 12.9<br>(12.6-13.3) | 11.7<br>(11.4-12.0) | 11.5<br>(11.2-11.9) | 11.4<br>(11.0-11.7) | 11.8<br>(11.5-12.2) | 13.3<br>(12.0-14.6) |
| Estonia                                          | 12.3<br>(11.9-12.5) | 12.2<br>(11.9-12.5) | 12.0<br>(11.7-12.3) | 12.0<br>(11.7-12.3) | 12.2<br>(11.9-12.5) | 11.6<br>(11.4-11.9) | 12.7<br>(12.4-13.0) | 13.3<br>(13.0-13.6) | 14.6<br>(14.3-15.0) | 15.7<br>(14.9-16.6) |
| Latvia                                           | 12.9<br>(12.6-13.3) | 12.4<br>(12.0-12.7) | 12.2<br>(11.9-12.6) | 12.1<br>(11.8-12.5) | 12.2<br>(11.8-12.6) | 11.5<br>(11.2-11.9) | 12.6<br>(12.2-13.0) | 12.4<br>(12.0-12.8) | 13.4<br>(13.0-13.8) | 14.2<br>(13.3-15.3) |
| Lithuania                                        | 13.9<br>(13.6-14.2) | 14.1<br>(13.9-14.5) | 13.6<br>(13.4-13.9) | 13.5<br>(13.2-13.7) | 13.5<br>(13.2-13.8) | 12.6<br>(12.3-12.9) | 13.6<br>(13.3-14.0) | 13.3<br>(13.0-13.6) | 13.8<br>(13.5-14.1) | 14.7<br>(14.1-15.3) |
| Moldova                                          | 11.5<br>(10.2-13.2) | 11.8<br>(10.5-13.1) | 12.0<br>(11.1-12.9) | 11.7<br>(11.1-12.4) | 12.1<br>(11.5-12.7) | 10.8<br>(10.3-11.3) | 11.9<br>(11.3-12.5) | 11.6<br>(11.1-12.3) | 12.3<br>(11.6-12.9) | 13.3<br>(12.4-14.4) |
| Russia                                           | 12.0<br>(11.4-12.7) | 11.8<br>(11.2-12.5) | 11.5<br>(10.9-12.2) | 11.6<br>(11.0-12.1) | 12.0<br>(11.4-12.8) | 10.6<br>(10.0-11.4) | 10.8<br>(10.2-11.5) | 11.0<br>(10.5-11.7) | 12.2<br>(11.5-12.9) | 13.2<br>(11.3-15.7) |
| Ukraine                                          | 12.9<br>(12.5-13.3) | 12.7<br>(12.3-13.1) | 12.3<br>(11.9-12.7) | 12.2<br>(11.9-12.6) | 12.4<br>(12.0-12.8) | 11.1<br>(10.8-11.5) | 11.5<br>(11.1-11.9) | 11.4<br>(11.0-11.8) | 12.5<br>(12.0-12.9) | 13.3<br>(11.6-15.5) |
| Central Europe                                   | 12.4<br>(12.3-12.5) | 12.6<br>(12.5-12.8) | 12.4<br>(12.3-12.5) | 12.5<br>(12.3-12.6) | 12.6<br>(12.5-12.8) | 12.7<br>(12.6-12.8) | 13.4<br>(13.2-13.5) | 13.9<br>(13.8-14.0) | 14.5<br>(14.4-14.6) | 15.4<br>(15.1-15.7) |
| Albania                                          | 15.9<br>(15-16.7)   | 16.0<br>(15.2-17.0) | 16.2<br>(15.4-17.0) | 15.8<br>(15.3-16.2) | 14.9<br>(14.7-15.1) | 15.0<br>(14.8-15.2) | 14.8<br>(14.6-15.0) | 14.8<br>(14.6-15.0) | 15.5<br>(15.1-15.9) | 16.1<br>(14.9-17.3) |
| Bosnia and Herzegovina                           | 12.3<br>(10.7-13.6) | 12.4<br>(11.2-13.7) | 12.4<br>(11.4-13.7) | 12.5<br>(11.6-13.5) | 12.8<br>(12.0-13.7) | 12.9<br>(12.0-13.8) | 14.2<br>(13.3-15.1) | 14.6<br>(13.7-15.4) | 15.2<br>(14.2-16.1) | 15.6<br>(14.4-16.8) |
| Bulgaria                                         | 13.2<br>(12.9-13.4) | 12.8<br>(12.6-13.1) | 12.7<br>(12.5-13.0) | 12.7<br>(12.3-12.8) | 12.6<br>(12.6-13.0) | 12.8<br>(12.3-12.8) | 13.1<br>(12.6-13.1) | 13.1<br>(12.9-13.4) | 13.8<br>(13.5-14.0) | 14.5<br>(13.1-15.6) |
| Croatia                                          | 11.7<br>(10.1-13.5) | 12.1<br>(10.6-13.6) | 12.3<br>(11.0-13.7) | 12.3<br>(11.6-13.0) | 12.7<br>(12.2-13.4) | 13.0<br>(12.5-13.6) | 13.3<br>(12.8-13.8) | 13.5<br>(13.3-14.4) | 14.5<br>(13.9-15.0) | 15.3<br>(14.2-16.3) |
| Czech Republic                                   | 11.3<br>(10.9-11.2) | 11.3<br>(11.1-11.4) | 11.3<br>(11.2-11.5) | 11.5<br>(11.3-11.7) | 11.5<br>(11.7-12.0) | 12.7<br>(12.6-12.9) | 13.7<br>(13.5-13.9) | 14.5<br>(14.3-14.6) | 15.3<br>(15.1-15.5) | 16.3<br>(15.9-16.8) |
| Hungary                                          | 12.0<br>(11.7-12.3) | 12.1<br>(11.7-12.5) | 11.7<br>(11.4-12.1) | 11.8<br>(11.4-12.1) | 12.2<br>(11.7-12.5) | 12.4<br>(11.9-12.6) | 12.9<br>(12.5-13.3) | 13.4<br>(13.0-13.8) | 14.0<br>(13.6-14.4) | 14.7<br>(13.9-15.7) |
| Macedonia                                        | 13.3<br>(12.6-13.9) | 13.2<br>(12.6-13.6) | 13.1<br>(12.6-13.5) | 12.9<br>(12.5-13.3) | 12.6<br>(12.2-13.0) | 12.3<br>(11.9-12.7) | 12.4<br>(12.0-12.8) | 12.7<br>(12.3-13.1) | 13.0<br>(12.6-13.5) | 13.7<br>(13.2-14.1) |
| Montenegro                                       | 14.4<br>(13.7-15.1) | 14.8<br>(14.0-15.4) | 14.5<br>(13.7-15.3) | 14.6<br>(13.8-15.5) | 15.4<br>(14.8-16.0) | 14.3<br>(13.8-14.8) | 14.0<br>(13.6-14.5) | 14.6<br>(14.2-15.1) | 15.4<br>(14.8-16.1) | 15.7<br>(14.9-16.6) |
| Poland                                           | 12.3<br>(12.1-12.6) | 12.6<br>(12.3-12.8) | 12.2<br>(12.0-12.5) | 12.3<br>(12.0-12.6) | 12.4<br>(12.2-12.7) | 12.7<br>(12.5-13.0) | 13.5<br>(13.3-13.8) | 14.4<br>(14.1-14.7) | 15.0<br>(14.8-15.3) | 16.0<br>(15.3-16.8) |
| Romania                                          | 12.9<br>(12.6-13.3) | 13.3<br>(13.0-13.6) | 12.9<br>(12.6-13.3) | 12.9<br>(12.6-13.3) | 12.6<br>(12.8-13.5) | 12.6<br>(12.2-13.0) | 13.6<br>(13.2-13.9) | 13.7<br>(13.4-14.1) | 14.8<br>(13.6-14.4) | 14.8<br>(13.9-15.6) |
| Serbia                                           | 13.7<br>(13.0-14.4) | 14.0<br>(13.0-14.8) | 13.9<br>(12.9-14.9) | 13.7<br>(12.8-14.9) | 13.5<br>(12.9-14.2) | 12.8<br>(12.3-13.3) | 12.9<br>(12.5-13.3) | 13.3<br>(12.9-13.7) | 14.0<br>(13.6-14.4) | 15.0<br>(14.6-15.4) |
| Slovakia                                         | 12.2<br>(11.9-12.5) | 12.4<br>(12.1-12.7) | 12.2<br>(11.9-12.5) | 12.2<br>(12.0-12.5) | 12.1<br>(11.8-12.5) | 12.6<br>(12.3-13.0) | 12.9<br>(12.6-13.2) | 13.4<br>(13.0-13.7) | 14.1<br>(13.8-14.5) | 15.1<br>(14.2-16.0) |
| Slovenia                                         | 11.4<br>(9.8-13.3)  | 11.7<br>(10.1-13.4) | 12.0<br>(11.0-13.1) | 12.5<br>(11.9-13.1) | 13.2<br>(12.7-13.9) | 13.6<br>(13.0-14.2) | 14.3<br>(13.7-14.9) | 15.2<br>(14.6-15.9) | 16.6<br>(16.0-17.2) | 17.5<br>(16.5-18.6) |
| Central Asia                                     | 12.5<br>(11.8-13.1) | 12.7<br>(12.0-13.3) | 12.8<br>(12.4-13.3) | 12.9<br>(12.6-13.2) | 12.9<br>(12.5-13.1) | 12.0<br>(11.8-12.3) | 12.1<br>(11.9-12.4) | 12.1<br>(11.7-12.2) | 12.6<br>(12.4-12.9) | 13.0<br>(13.1-14.0) |
| Armenia                                          | 14.2<br>(12.8-15.8) | 14.3<br>(13.0-15.9) | 14.5<br>(13.7-15.5) | 14.7<br>(14.2-15.2) | 14.0<br>(13.5-14.5) | 12.9<br>(12.5-13.4) | 13.9<br>(13.4-14.4) | 14.0<br>(13.3-14.3) | 14.8<br>(13.5-14.6) | 14.8<br>(14.0-15.6) |
| Azerbaijan                                       | 12.6<br>(11.3-14.0) | 12.8<br>(11.5-14.1) | 12.6<br>(11.9-13.5) | 12.3<br>(11.8-13.0) | 12.4<br>(12.0-12.9) | 12.1<br>(11.5-12.5) | 12.2<br>(11.7-12.8) | 12.2<br>(11.8-13.1) | 12.4<br>(11.7-13.1) | 12.4<br>(12.5-15.4) |
| Georgia                                          | 12.9<br>(11.4-14.6) | 13.1<br>(11.5-15.0) | 13.1<br>(12.3-14.4) | 13.1<br>(12.5-13.9) | 13.1<br>(12.5-13.9) | 13.6<br>(13.0-14.3) | 13.6<br>(13.0-14.4) | 13.6<br>(12.7-13.7) | 13.4<br>(12.8-14.0) | 13.4<br>(12.6-15.1) |
| Kazakhstan                                       | 11.4<br>(9.5-13.7)  | 11.7<br>(9.7-13.8)  | 11.9<br>(10.7-13.3) | 12.2<br>(11.4-13.2) | 12.2<br>(11.5-13.0) | 10.9<br>(10.2-11.6) | 10.9<br>(10.3-11.6) | 10.9<br>(10.2-11.7) | 11.9<br>(11.2-12.6) | 13.3<br>(11.9-14.7) |
| Kyrgyzstan                                       | 12.1<br>(10.7-13.6) | 12.3<br>(11.0-13.7) | 12.6<br>(12.2-13.0) | 12.6<br>(12.2-12.9) | 12.5<br>(12.1-12.8) | 12.5<br>(11.1-11.7) | 12.3<br>(12.0-12.6) | 12.3<br>(11.4-12.1) | 12.3<br>(11.6-12.6) | 12.3<br>(12.9-14.3) |
| Mongolia                                         | 11.7<br>(10.9-12.3) | 12.4<br>(11.8-13.1) | 12.2<br>(11.6-12.9) | 12.0<br>(11.5-12.8) | 12.1<br>(11.5-12.8) | 11.2<br>(10.7-11.9) | 11.1<br>(10.6-11.7) | 10.9<br>(10.4-11.5) | 11.6<br>(11.0-12.4) | 12.3<br>(11.5-13.2) |
| Tajikistan                                       | 13.4<br>(12.6-14.5) | 13.7<br>(12.7-14.8) | 14.0<br>(13.0-15.0) | 13.7<br>(12.9-14.7) | 13.6<br>(12.8-14.5) | 13.3<br>(12.5-14.2) | 12.8<br>(12.1-13.6) | 12.6<br>(11.9-13.4) | 13.3<br>(12.5-14.1) | 14.9<br>(13.6-15.8) |
| Turkmenistan                                     | 12.1<br>(11.6-12.6) | 12.2<br>(11.8-12.7) | 12.4<br>(12.1-12.7) | 12.5<br>(12.3-12.8) | 12.4<br>(12.2-12.6) | 12.0<br>(11.8-12.2) | 12.3<br>(12.0-12.5) | 12.6<br>(12.4-12.9) | 13.2<br>(12.9-13.4) | 13.7<br>(13.3-14.2) |
| Uzbekistan                                       | 12.8<br>(11.9-13.7) | 13.0<br>(12.1-13.8) | 13.3<br>(12.6-13.9) | 13.4<br>(13.0-13.9) | 13.2<br>(12.7-13.7) | 12.2<br>(11.8-12.7) | 11.9<br>(11.5-12.4) | 11.7<br>(11.1-12.1) | 12.7<br>(12.3-13.1) | 13.1<br>(12.4-13.8) |
| Latin America and Caribbean                      | 13.6<br>(13.5-13.8) | 14.1<br>(14.0-14.2) | 14.4<br>(14.3-14.5) | 14.3<br>(14.2-14.4) | 14.7<br>(14.6-14.8) | 14.9<br>(14.8-15.0) | 15.4<br>(15.3-15.5) | 16.0<br>(15.9-16.0) | 16.3<br>(16.1-16.4) | 16.8<br>(16.6-16.9) |
| Central Latin America                            | 14.4<br>(14.2-14.6) | 14.8<br>(14.6-14.9) | 15.2<br>(15.0-15.3) | 15.1<br>(15.0-15.3) | 15.8<br>(15.6-15.9) | 15.9<br>(15.8-16.1) | 16.5<br>(16.3-16.6) | 16.7<br>(16.5-16.8) | 16.9<br>(16.8-17.1) | 17.3<br>(17.0-17.6) |
| Colombia                                         | 15.2<br>(14.9-15.4) | 14.3<br>(14.0-14.6) | 15.1<br>(14.8-15.4) | 14.5<br>(14.2-14.7) | 15.4<br>(15.2-15.7) | 15.5<br>(15.2-15.7) | 15.8<br>(15.6-16.1) | 16.1<br>(15.9-16.4) | 16.8<br>(16.6-17.0) | 17.6<br>(16.9-18.3) |
| Costa Rica                                       | 15.1<br>(14.8-15.4) | 15.7<br>(15.4-16.0) | 16.1<br>(15.8-16.5) | 16.2<br>(15.9-16.5) | 16.4<br>(16.0-16.7) | 16.6<br>(16.3-16.9) | 17.3<br>(17.0-17.5) | 18.3<br>(18.0-18.6) | 19.2<br>(18.9-19.5) | 19.5<br>(18.9-20.2) |
| El Salvador                                      | 14.0<br>(13.6-14.4) | 14.0<br>(13.7-14.4) | 16.9<br>(16.4-17.4) | 15.2<br>(14.7-15.6) | 15.3<br>(14.9-15.6) | 15.9<br>(15.5-16.3) | 16.6<br>(16.2-17.0) | 17.4<br>(17.1-17.7) | 17.7<br>(17.3-18.2) | 18.0<br>(17.1-18.9) |
| Guatemala                                        | 12.5<br>(11.5-13.6) | 13.6<br>(12.6-14.7) | 14.7<br>(13.6-15.8) | 14.3<br>(13.3-15.4) | 14.8<br>(13.9-15.9) | 15.0<br>(14.0-16.0) | 15.6<br>(14.5-16.9) | 16.2<br>(15.0-17.3) | 16.7<br>(15.6-18.0) | 16.9<br>(15.1-19.0) |
| Honduras                                         | 12.8<br>(12.4-13.6) | 13.6<br>(13.0-14.5) | 14.4<br>(13.4-15.6) | 14.9<br>(14.0-16.1) | 15.7<br>(14.1-16.9) | 15.3<br>(13.2-16.9) | 15.2<br>(13.2-17.1) | 15.2<br>(13.2-17.5) | 15.5<br>(13.4-17.7) | 15.7<br>(13.5-17.9) |
| Mexico                                           | 14.4<br>(14.1-14.7) | 15.1<br>(14.8-15.3) | 15.2<br>(15.0-15.4) | 15.4<br>(15.3-15.5) | 16.0<br>(15.9-16.2) | 16.3<br>(16.2-16.4) | 16.8<br>(16.7-17.0) | 16.8<br>(16.6-16.9) | 16.9<br>(16.7-17.0) | 17.2<br>(17.0-17.4) |
| Nicaragua                                        | 15.2<br>(14.7-15.8) | 16.3<br>(15.9-16.6) | 17.1<br>(16.3-18.0) | 16.3<br>(15.5-17.3) | 18.2<br>(17.9-18.6) | 17.5<br>(17.1-17.9) | 18.2<br>(17.9-18.5) | 18.2<br>(17.9-18.5) | 18.4<br>(18.0-18.7) | 18.4<br>(17.1-19.7) |
| Panama                                           | 15.8<br>(14.6-15.8) | 16.1<br>(15.5-16.7) | 16.5<br>(15.9-17.1) | 16.1<br>(15.5-16.7) | 16.2<br>(15.6-16.8) | 16.4<br>(15.8-16.9) | 17.5<br>(16.9-18.2) | 17.9<br>(17.4-18.6) | 18.2<br>(17.6-18.9) | 18.8<br>(17.6-19.9) |
| Venezuela                                        | 14.3<br>(13.8-14.8) | 14.3<br>(13.8-14.8) | 14.4<br>(13.9-15.0) | 14.9<br>(14.3-15.5) | 15.1<br>(14.5-15.6) | 15.2<br>(14.6-15.9) | 15.8<br>(15.3-16.4) | 16.6<br>(16.0-17.1) | 16.7<br>(16.2-17.3) | 16.7<br>(15.3-18.0) |
| Andean Latin America                             | 13.8<br>(13.0-14.5) | 15.2<br>(14.8-15.6) | 15.2<br>(14.9-15.6) | 15.2<br>(14.9-15.6) | 15.7<br>(15.3-16.1) | 16.0<br>(15.6-16.4) | 16.7<br>(16.4-17.1) | 17.5<br>(17.1-17.9) | 17.7<br>(17.3-18.2) | 18.4<br>(17.5-19.2) |
| Bolivia                                          | 12.2<br>(11.7-12.9) | 12.5<br>(12.0-13.2) | 12.8<br>(12.3-13.4) | 12.8<br>(12.6-13.9) | 13.1<br>(13.1-14.4) | 13.8<br>(13.7-15.0) | 14.4<br>(14.4-15.4) | 14.9<br>(15.0-16.5) | 15.7<br>(15.3-17.4) | 16.1<br>(15.5-18.0) |
| Ecuador                                          | 16.5<br>(16.2-16.9) | 16.0<br>(15.7-16.4) | 16.1<br>(15.7-16.5) | 16.2<br>(15.7-16.4) | 16.7<br>(15.8-16.5) | 17.3<br>(16.4-17.1) | 17.3<br>(16.9-17.7) | 17.3<br>(17.5-18.2) | 17.8<br>(17.8-18.6) | 18.7<br>(18.0-19.3) |
| Peru                                             | 13.1<br>(11.9-14.4) | 15.9<br>(15.1-16.6) | 15.7<br>(15.2-16.4) | 15.6<br>(15.1-16.2) | 16.2<br>(15.6-16.8) | 16.2<br>(15.6-16.8) | 17.1<br>(16.6-17.7) | 17.1<br>(17.3-18.7) | 18.1<br>(17.4-18.8) | 18.1<br>(17.4-20.5) |
| Caribbean                                        | 14.2<br>(13.9-14.4) | 14.5<br>(14.3-14.8) | 14.9<br>(14.7-15.1) | 15.0<br>(14.8-15.2) | 15.1<br>(14.9-15.3) | 15.1<br>(14.9-15.3) | 15.7<br>(15.5-15.9) | 15.7<br>(15.9-16.4) | 16.3<br>(16.3-16.1) | 16.5<br>(16.1-16.9) |
| Antigua and Barbuda                              | 11.6<br>(11.1-12.1) | 11.2<br>(10.7-11.8) | 12.1<br>(11.5-12.8) | 13.0<br>(12.4-13.8) | 13.0                |                     |                     |                     |                     |                     |

**Appendix Table 14B. Estimates of life expectancy at age 65 by location, males, 1970, 1975, 1980, 1985, 1990, 1995, 2000, 2005, 2010, 2016**

| Location                               | 1970                | 1975                | 1980                | 1985                | 1990                | 1995                | 2000                | 2005                | 2010                | 2016                |
|----------------------------------------|---------------------|---------------------|---------------------|---------------------|---------------------|---------------------|---------------------|---------------------|---------------------|---------------------|
| Barbados                               | 13.6<br>(13.1-14.1) | 13.9<br>(13.4-14.4) | 14.4<br>(14.0-15.0) | 14.1<br>(13.6-14.5) | 14.2<br>(13.7-14.6) | 14.3<br>(13.8-14.9) | 15.6<br>(15.0-16.2) | 16.3<br>(15.8-16.8) | 16.8<br>(16.3-17.4) | 16.7<br>(16.0-17.5) |
| Belize                                 | 15.4<br>(15.0-16.0) | 15.1<br>(14.8-15.5) | 15.2<br>(14.7-15.5) | 15.2<br>(14.8-15.8) | 15.5<br>(14.3-16.2) | 13.6<br>(12.8-14.4) | 13.0<br>(12.2-13.6) | 13.3<br>(12.4-14.1) | 14.0<br>(13.0-14.6) | 14.1<br>(13.1-15.2) |
| Bermuda                                | 11.8<br>(11.4-12.3) | 11.3<br>(10.9-11.8) | 12.0<br>(11.5-12.6) | 12.2<br>(11.7-12.8) | 12.5<br>(11.9-13.0) | 12.8<br>(12.3-13.3) | 12.6<br>(12.2-13.2) | 14.7<br>(14.2-15.2) | 15.5<br>(14.9-16.1) | 16.3<br>(15.3-17.2) |
| Cuba                                   | 14.9<br>(14.6-15.2) | 15.5<br>(15.2-15.8) | 15.8<br>(15.5-16.2) | 15.8<br>(15.5-16.2) | 15.7<br>(15.4-16.0) | 15.7<br>(15.3-16.0) | 16.4<br>(16.0-16.7) | 16.8<br>(16.4-17.2) | 17.1<br>(16.8-17.5) | 17.3<br>(16.6-18.0) |
| Dominica                               | 14.1<br>(13.6-14.6) | 14.4<br>(14.0-14.9) | 15.5<br>(15.0-16.0) | 14.6<br>(14.0-15.3) | 13.6<br>(13.1-14.3) | 13.2<br>(12.7-13.9) | 13.9<br>(13.4-14.7) | 14.3<br>(13.7-15.0) | 14.5<br>(14.0-15.2) | 14.6<br>(13.7-15.8) |
| Dominican Republic                     | 15.7<br>(15.4-16.3) | 16.0<br>(15.5-16.6) | 16.3<br>(15.7-16.9) | 16.1<br>(15.7-16.7) | 16.1<br>(15.5-16.6) | 16.1<br>(15.7-16.7) | 16.5<br>(16.0-17.3) | 16.8<br>(16.3-17.8) | 17.0<br>(16.5-18.1) | 17.2<br>(16.3-18.5) |
| Grenada                                | 13.3<br>(12.3-14.4) | 13.3<br>(12.4-14.4) | 13.7<br>(12.6-15.0) | 13.4<br>(12.5-14.8) | 13.7<br>(13.0-14.4) | 13.9<br>(13.2-14.6) | 13.8<br>(13.0-14.4) | 13.8<br>(13.2-14.4) | 13.9<br>(13.4-14.6) | 14.0<br>(13.1-14.9) |
| Guyana                                 | 11.5<br>(10.9-12.1) | 11.7<br>(11.0-12.3) | 11.9<br>(11.3-12.6) | 12.5<br>(11.8-13.1) | 11.8<br>(11.2-12.4) | 12.7<br>(12.2-13.2) | 13.1<br>(12.6-13.6) | 12.4<br>(11.9-12.9) | 12.2<br>(11.7-12.8) | 13.0<br>(12.3-13.7) |
| Haiti                                  | 11.7<br>(10.8-12.8) | 11.8<br>(10.9-13.0) | 11.9<br>(11.2-12.9) | 12.0<br>(11.4-12.7) | 12.3<br>(11.8-12.8) | 12.5<br>(12.1-12.9) | 12.8<br>(12.3-13.4) | 13.2<br>(12.5-14.4) | 9.1<br>(6.9-12.6)   | 13.8<br>(12.4-15.2) |
| Jamaica                                | 14.0<br>(13.4-14.6) | 14.9<br>(14.3-15.7) | 15.1<br>(14.5-15.8) | 15.5<br>(15.0-16.1) | 16.8<br>(16.3-17.5) | 16.6<br>(16.0-17.3) | 16.3<br>(15.6-17.0) | 17.1<br>(16.4-17.7) | 16.4<br>(15.5-17.1) | 16.3<br>(14.8-17.6) |
| Puerto Rico                            | 15.1<br>(14.7-15.5) | 14.6<br>(14.3-15.0) | 15.6<br>(15.2-16.1) | 15.8<br>(15.4-16.2) | 15.9<br>(15.5-16.3) | 15.8<br>(15.4-16.2) | 16.8<br>(16.4-17.3) | 17.2<br>(16.7-17.6) | 17.4<br>(17.0-17.8) | 17.6<br>(16.9-18.3) |
| Saint Lucia                            | 13.4<br>(13.0-13.8) | 12.8<br>(12.5-13.1) | 13.3<br>(13.0-13.7) | 13.8<br>(13.5-14.1) | 15.0<br>(14.7-15.4) | 15.9<br>(15.5-16.2) | 16.7<br>(16.3-17.1) | 16.1<br>(15.7-16.4) | 17.0<br>(16.6-17.4) | 17.2<br>(16.6-17.7) |
| Saint Vincent and the Grenadines       | 13.5<br>(12.9-14.3) | 13.5<br>(13.0-14.2) | 14.2<br>(13.2-15.1) | 14.1<br>(13.1-15.5) | 13.8<br>(13.1-15.1) | 13.8<br>(13.2-14.4) | 13.6<br>(12.8-14.2) | 14.0<br>(13.4-14.5) | 14.1<br>(13.5-14.6) | 14.0<br>(13.1-14.6) |
| Suriname                               | 13.2<br>(12.9-13.4) | 13.0<br>(12.6-13.3) | 13.1<br>(12.9-13.2) | 14.3<br>(14.1-14.6) | 15.2<br>(15.0-15.4) | 15.1<br>(14.8-15.4) | 14.6<br>(14.2-14.9) | 14.1<br>(13.8-14.4) | 14.1<br>(13.8-14.5) | 14.5<br>(13.8-15.3) |
| Trinidad and Tobago                    | 11.8<br>(11.5-12.1) | 12.4<br>(12.1-12.7) | 13.0<br>(12.7-13.3) | 12.8<br>(12.4-13.1) | 12.4<br>(12.1-12.7) | 12.4<br>(12.1-12.7) | 12.7<br>(12.4-13.0) | 13.8<br>(13.5-14.1) | 14.3<br>(13.9-14.7) | 14.4<br>(13.8-15.0) |
| Virgin Islands, U.S.                   | 12.1<br>(11.6-12.6) | 12.5<br>(12.1-13.1) | 13.0<br>(12.6-13.4) | 13.7<br>(13.4-14.3) | 14.0<br>(13.6-14.5) | 14.0<br>(13.6-14.3) | 14.2<br>(13.8-14.5) | 14.5<br>(14.0-14.9) | 14.4<br>(13.8-15.1) | 14.6<br>(13.8-15.7) |
| Tropical Latin America                 | 12.6<br>(12.3-13.0) | 13.0<br>(12.8-13.3) | 13.1<br>(12.9-13.2) | 13.0<br>(12.8-13.1) | 13.2<br>(13.0-13.3) | 13.4<br>(13.2-13.6) | 14.0<br>(13.9-14.2) | 14.9<br>(14.7-15.0) | 15.5<br>(15.7-16.2) | 16.0<br>(15.7-16.2) |
| Brazil                                 | 12.6<br>(12.2-12.9) | 12.9<br>(12.2-13.2) | 12.9<br>(12.9-13.2) | 12.9<br>(12.7-13.0) | 13.0<br>(12.9-13.2) | 13.3<br>(13.2-13.5) | 14.3<br>(13.8-14.1) | 14.8<br>(14.7-15.0) | 15.5<br>(15.4-15.7) | 15.5<br>(15.8-16.2) |
| Paraguay                               | 15.9<br>(15.5-16.3) | 16.0<br>(15.5-16.3) | 16.3<br>(16.0-16.8) | 16.3<br>(15.9-16.7) | 16.4<br>(16.2-17.0) | 16.4<br>(16.2-16.8) | 16.4<br>(16.2-16.6) | 16.4<br>(16.1-16.5) | 16.3<br>(15.3-16.4) | 16.3<br>(14.7-16.5) |
| Southeast Asia, East Asia, and Oceania | 12.8<br>(12.7-13.0) | 12.9<br>(12.8-13.0) | 12.5<br>(12.3-12.6) | 12.5<br>(12.6-12.8) | 12.7<br>(12.3-12.6) | 12.4<br>(12.7-12.9) | 12.8<br>(13.0-13.2) | 13.1<br>(13.6-13.9) | 13.5<br>(14.3-14.6) | 15.1<br>(14.9-15.2) |
| East Asia                              | 13.0<br>(12.9-13.2) | 13.1<br>(12.9-13.2) | 12.3<br>(12.2-12.5) | 12.3<br>(12.4-12.7) | 12.5<br>(12.0-12.4) | 12.1<br>(12.4-12.7) | 12.9<br>(12.8-13.1) | 13.6<br>(13.5-13.8) | 14.5<br>(14.4-14.7) | 15.1<br>(15.0-15.3) |
| China                                  | 13.0<br>(12.9-13.2) | 13.1<br>(12.9-13.2) | 12.3<br>(12.1-12.5) | 12.5<br>(12.3-12.7) | 12.5<br>(12.0-12.3) | 12.1<br>(12.4-12.7) | 12.9<br>(12.8-13.0) | 13.6<br>(13.5-13.8) | 14.5<br>(14.3-14.6) | 15.1<br>(15.0-15.3) |
| North Korea                            | 13.7<br>(13.2-14.3) | 14.1<br>(13.2-14.8) | 14.0<br>(13.1-15.2) | 14.0<br>(13.2-15.3) | 14.0<br>(13.2-15.3) | 12.2<br>(11.0-14.0) | 11.9<br>(10.8-13.4) | 13.4<br>(13.0-14.0) | 13.4<br>(13.0-14.0) | 13.5<br>(13.1-14.0) |
| Taiwan (Province of China)             | 11.9<br>(11.6-12.2) | 12.9<br>(12.5-13.2) | 13.2<br>(12.8-13.5) | 13.8<br>(13.5-14.1) | 14.6<br>(14.3-15.0) | 15.2<br>(14.8-15.5) | 16.0<br>(15.7-16.4) | 16.8<br>(16.4-17.2) | 17.6<br>(17.2-18.0) | 17.9<br>(16.9-19.0) |
| Southeast Asia                         | 12.3<br>(12.0-12.5) | 12.5<br>(12.3-12.8) | 13.0<br>(12.7-13.2) | 13.2<br>(13.0-13.4) | 13.4<br>(13.2-13.6) | 13.6<br>(13.3-13.8) | 13.8<br>(13.6-14.0) | 14.1<br>(13.8-14.3) | 14.1<br>(14.2-14.7) | 14.8<br>(14.5-15.2) |
| Cambodia                               | 11.1<br>(10.1-11.6) | 9.0<br>(7.4-11.0)   | 11.3<br>(10.5-12.0) | 11.3<br>(10.6-12.0) | 11.7<br>(11.2-12.3) | 12.0<br>(11.5-12.4) | 12.1<br>(11.5-12.5) | 12.5<br>(11.9-13.1) | 12.8<br>(12.2-13.4) | 13.1<br>(12.6-13.7) |
| Indonesia                              | 12.3<br>(12.0-12.6) | 12.6<br>(12.4-12.9) | 13.1<br>(12.8-13.3) | 13.4<br>(13.2-13.6) | 13.6<br>(13.2-13.6) | 13.6<br>(13.5-13.8) | 14.1<br>(13.9-14.3) | 14.3<br>(14.0-14.6) | 14.3<br>(13.9-14.8) | 14.6<br>(14.0-15.3) |
| Laos                                   | 10.9<br>(10.4-11.3) | 11.2<br>(10.7-11.5) | 11.6<br>(11.0-11.6) | 11.6<br>(11.4-11.8) | 11.6<br>(11.6-11.9) | 12.0<br>(11.8-12.1) | 12.2<br>(12.1-12.4) | 12.2<br>(12.4-12.8) | 12.2<br>(12.8-13.3) | 13.7<br>(13.3-14.2) |
| Malaysia                               | 11.4<br>(11.2-11.7) | 12.2<br>(12.0-12.5) | 12.7<br>(12.5-13.0) | 12.7<br>(13.0-13.4) | 13.2<br>(13.3-13.7) | 13.5<br>(13.6-13.9) | 14.0<br>(13.9-14.2) | 14.0<br>(14.6-14.9) | 15.1<br>(14.9-15.4) | 15.3<br>(14.8-15.8) |
| Maldives                               | 12.8<br>(10.6-15.1) | 12.8<br>(10.5-14.8) | 12.7<br>(11.2-14.6) | 13.2<br>(12.6-13.9) | 13.2<br>(13.0-14.3) | 13.9<br>(13.0-14.8) | 14.8<br>(14.1-15.4) | 15.9<br>(15.3-16.6) | 16.5<br>(15.7-17.1) | 17.2<br>(15.5-19.2) |
| Mauritius                              | 8.6<br>(8.4-8.9)    | 8.3<br>(8.0-8.5)    | 9.6<br>(9.3-9.8)    | 10.3<br>(10.1-10.6) | 11.0<br>(10.7-11.3) | 11.6<br>(11.3-11.9) | 12.9<br>(12.6-13.1) | 14.0<br>(13.0-13.6) | 14.4<br>(14.0-14.7) | 14.8<br>(13.9-15.9) |
| Myanmar                                | 10.3<br>(9.7-11.1)  | 10.7<br>(10.0-11.4) | 11.0<br>(10.2-11.6) | 11.5<br>(10.8-12.1) | 11.6<br>(10.8-12.3) | 11.7<br>(10.9-12.4) | 12.1<br>(10.8-12.7) | 12.6<br>(11.0-13.3) | 13.0<br>(11.6-13.7) | 13.4<br>(12.8-13.9) |
| Philippines                            | 13.7<br>(13.3-14.2) | 13.5<br>(13.1-13.9) | 13.5<br>(13.1-13.9) | 13.2<br>(12.9-13.6) | 13.1<br>(12.7-13.5) | 12.5<br>(12.1-12.9) | 12.1<br>(11.7-12.5) | 11.9<br>(11.5-12.3) | 12.3<br>(11.9-12.7) | 12.6<br>(11.6-13.6) |
| Sri Lanka                              | 12.3<br>(11.9-12.8) | 12.1<br>(11.7-12.6) | 12.8<br>(13.3-14.2) | 13.8<br>(13.7-14.7) | 14.2<br>(14.4-15.5) | 15.0<br>(14.8-16.2) | 15.6<br>(14.5-15.6) | 15.6<br>(14.2-15.7) | 16.2<br>(14.5-16.1) | 16.2<br>(14.4-18.1) |
| Seychelles                             | 13.2<br>(12.4-13.5) | 13.1<br>(12.6-13.7) | 13.0<br>(12.7-13.4) | 12.7<br>(12.1-13.3) | 12.5<br>(12.1-12.8) | 12.5<br>(12.2-12.9) | 13.2<br>(13.4-13.9) | 13.7<br>(13.4-13.9) | 14.1<br>(13.7-14.4) | 14.4<br>(13.6-15.4) |
| Thailand                               | 14.2<br>(13.8-14.6) | 14.6<br>(14.2-14.9) | 14.2<br>(13.9-14.6) | 14.2<br>(13.8-14.5) | 14.7<br>(14.4-15.1) | 15.5<br>(15.1-15.9) | 16.1<br>(15.6-16.6) | 16.6<br>(16.2-17.0) | 17.8<br>(17.4-18.2) | 18.3<br>(17.4-19.2) |
| Timor-Leste                            | 12.5<br>(11.3-14.1) | 12.7<br>(11.4-14.2) | 13.5<br>(12.1-15.0) | 14.2<br>(13.0-15.4) | 14.4<br>(13.4-15.5) | 14.5<br>(13.7-15.4) | 14.7<br>(13.8-15.6) | 14.8<br>(13.9-15.9) | 15.9<br>(14.8-17.3) | 16.1<br>(14.6-17.7) |
| Vietnam                                | 12.0<br>(10.6-12.9) | 12.5<br>(11.1-13.2) | 12.9<br>(11.6-13.4) | 13.3<br>(12.2-13.8) | 13.5<br>(12.5-14.4) | 13.4<br>(12.5-14.4) | 13.3<br>(12.8-14.4) | 13.5<br>(12.8-14.7) | 14.0<br>(13.1-15.0) | 14.5<br>(13.5-15.1) |
| Oceania                                | 10.4<br>(9.9-11.3)  | 10.3<br>(9.8-11.0)  | 10.3<br>(9.9-10.9)  | 10.4<br>(10.0-10.9) | 10.6<br>(10.2-11.1) | 10.8<br>(10.3-11.3) | 10.9<br>(10.4-11.4) | 10.9<br>(10.4-11.5) | 11.1<br>(10.5-11.7) | 11.5<br>(10.9-12.1) |
| American Samoa                         | 12.1<br>(11.4-12.9) | 12.5<br>(11.8-13.1) | 12.8<br>(12.1-13.4) | 13.1<br>(12.5-13.7) | 12.9<br>(12.4-13.5) | 13.3<br>(12.6-14.0) | 13.8<br>(13.2-14.3) | 13.9<br>(13.2-14.5) | 14.3<br>(13.5-15.1) | 14.4<br>(13.3-15.5) |
| Federated States of Micronesia         | 11.2<br>(10.1-12.7) | 10.9<br>(10.1-12.4) | 10.9<br>(10.2-12.1) | 11.0<br>(10.4-12.1) | 11.2<br>(10.7-12.1) | 11.5<br>(10.9-12.4) | 11.9<br>(11.2-12.6) | 12.2<br>(11.5-13.0) | 12.0<br>(10.9-12.9) | 12.0<br>(11.0-13.0) |
| Fiji                                   | 11.6<br>(10.4-13.3) | 11.1<br>(10.3-12.4) | 11.3<br>(10.5-12.4) | 11.6<br>(10.9-12.3) | 11.7<br>(10.7-12.9) | 11.4<br>(10.5-12.5) | 11.2<br>(10.6-11.9) | 11.3<br>(10.6-12.3) | 11.3<br>(10.4-12.5) | 11.7<br>(10.2-13.6) |
| Guam                                   | 12.4<br>(11.8-12.9) | 12.2<br>(11.5-12.8) | 13.0<br>(12.3-13.7) | 13.9<br>(13.2-14.5) | 14.2<br>(13.7-14.7) | 14.5<br>(13.7-15.1) | 14.6<br>(14.0-15.1) | 14.4<br>(13.8-14.8) | 13.8<br>(13.2-14.5) | 13.8<br>(13.0-14.8) |
| Kiribati                               | 10.2<br>(9.3-11.6)  | 10.5<br>(9.6-11.9)  | 10.5<br>(9.7-11.7)  | 10.1<br>(9.6-11.0)  | 10.0<br>(9.6-10.4)  | 9.9<br>(9.7-10.2)   | 10.0<br>(9.7-10.3)  | 10.2<br>(9.7-10.6)  | 10.3<br>(9.7-11.0)  | 10.6<br>(9.9-11.3)  |
| Marshall Islands                       | 10.7<br>(9.6-12.5)  | 11.0<br>(10.0-12.6) | 11.2<br>(10.5-12.7) | 11.2<br>(10.7-12.2) | 11.3<br>(10.9-11.8) | 11.4<br>(11.0-12.0) | 11.3<br>(10.8-12.0) | 11.3<br>(10.7-12.0) | 11.4<br>(10.8-12.2) | 11.8<br>(10.9-12.8) |
| Northern Mariana Islands               | 13.4<br>(12.3-15.0) | 13.9<br>(12.8-15.4) | 14.4<br>(13.2-15.7) | 14.7<br>(13.6-16.0) | 15.3<br>(14.2-16.4) | 15.9<br>(14.8-16.8) | 16.3<br>(15.3-17.1) | 16.2<br>(15.3-17.1) | 16.1<br>(15.2-17.0) | 15.8<br>(14.8-16.8) |
| Papua New Guinea                       | 9.9<br>(9.2-11.4)   | 9.8<br>(9.1-11.1)   | 9.7<br>(9.1-10.6)   | 9.7<br>(9.2-10.5)   | 9.9<br>(9.3-10.6)   | 10.1<br>(9.5-10.9)  | 10.3<br>(9.7-11.3)  | 10.4<br>(9.7-11.3)  | 10.6<br>(9.9-11.6)  | 11.1<br>(10.3-12.0) |
| Samoa                                  | 12.5<br>(11.6-13.4) | 11.8<br>(11.1-12.7) | 12.1<br>(11.4-12.8) | 12.4<br>(11.5-13.1) | 12.7<br>(11.9-13.4) | 13.0<br>(12.2-13.7) | 13.4<br>(12.5-14.2) | 13.7<br>(12.9-14.7) | 13.9<br>(13.1-15.0) | 14.1<br>(13.4-15.4) |
| Solomon Islands                        | 9.9<br>(9.1-11.1)   | 9.6<br>(9.1-10.5)   | 10.2<br>(9.6-10.8)  | 10.4<br>(9.8-11.0)  | 10.6<br>(10.0-11.3) | 10.9<br>(10.3-11.5) | 11.1<br>(10.5-11.6) | 11.0<br>(10.4-11.6) | 11.2<br>(10.5-11.8) | 11.5<br>(10.7-12.3) |
| Tonga                                  | 12.2<br>(11.0-13.4) | 12.2<br>(11.1-13.4) | 12.2<br>(11.4-13.4) | 12.3<br>(11.4-13.4) | 12.6<br>(11.7-13.6) | 12.8<br>(11.9-13.6) | 12.8<br>(12.1-13.7) | 13.0<br>(12.3-13.9) | 13.1<br>(12.3-14.0) | 13.3<br>(12.5-14.3) |
| Vanuatu                                | 10.2<br>(9.4-11.5)  | 10.2<br>(9.6-11.2)  | 10.4<br>(9.8-11.1)  | 10.4<br>(10.2-11.2) | 10.7<br>(10.4-11.4) | 10.9<br>(10.5-11.6) | 11.1<br>(10.6-11.7) | 11.2<br>(10.6-11.8) | 11.2<br>(10.7-12.1) | 11.7<br>(10.9-12.5) |
| North Africa and Middle East           | 13.0<br>(12.7-13.4) | 13.3<br>(13.0-13.6) | 13.7<br>(13.4-14.0) | 13.9<br>(13.7-14.2) | 14.4<br>(14.2-14.6) | 14.3<br>(14.1-14.5) | 14.7<br>(14.5-14.9) | 14.7<br>(14.7-15.3) | 15.0<br>(15.1-15.7) | 15.7<br>(15.3-16.1) |
| North Africa and Middle East           | 10.9<br>(10.2-11.5) | 10.8<br>(10.2-11.4) | 10.5<br>(9.8-11.1)  | 10.3<br>(9.6-11.1)  | 10.3<br>(10.1-11.6) | 10.8<br>(9.7-11.1)  | 10.3<br>(9.6-10.9)  | 10.3<br>(9.7-11.0)  | 10.5<br>(10.0-11.2) | 10.9<br>(10.4-11.5) |
| Afghanistan                            | 13.6<br>(12.9-14.3) | 13.4<br>(12.8-14.1) | 14.5<br>(13.3-14.3) | 14.5<br>(14.0-15.0) | 15.3<br>(14.8-16.0) | 15.8<br>(15.2-16.5) | 16.3<br>(15.7-17.0) | 17.0<br>(16.4-17.7) | 17.6<br>(17.1-18.1) | 17.6<br>(17.0-18.6) |
| Algeria                                | 12.9<br>(11.9-13.9) | 12.7<br>(11.5-13.9) | 12.1<br>(11.1-13.3) | 11.9<br>(11.1-12.9) | 11.7<br>(10.8-12.7) | 11.7<br>(10.8-12.9  |                     |                     |                     |                     |

Appendix Table 14B. Estimates of life expectancy at age 65 by location, males, 1970, 1975, 1980, 1985, 1990, 1995, 2000, 2005, 2010, 2016

| Location                    | 1970                | 1975                | 1980                | 1985                | 1990                | 1995                | 2000                | 2005                | 2010                | 2016                |
|-----------------------------|---------------------|---------------------|---------------------|---------------------|---------------------|---------------------|---------------------|---------------------|---------------------|---------------------|
| Egypt                       | 11.8<br>(11.4-12.1) | 12.0<br>(11.6-12.4) | 12.6<br>(12.2-13.0) | 11.8<br>(11.5-12.3) | 12.9<br>(12.6-13.4) | 13.2<br>(12.8-13.6) | 13.8<br>(13.4-14.2) | 13.6<br>(13.2-14.1) | 13.5<br>(13.1-13.9) | 14.0<br>(13.0-15.1) |
| Iran                        | 15.3<br>(13.9-16.7) | 15.6<br>(14.5-16.8) | 15.5<br>(14.5-16.7) | 15.7<br>(14.6-16.9) | 14.8<br>(13.7-16.1) | 14.9<br>(14.0-15.9) | 15.0<br>(13.9-15.8) | 15.1<br>(13.6-16.4) | 16.0<br>(14.4-17.3) | 16.3<br>(14.9-17.7) |
| Iraq                        | 13.3<br>(12.8-13.9) | 13.3<br>(12.8-13.9) | 13.3<br>(12.8-14.2) | 13.3<br>(12.3-14.2) | 13.5<br>(12.1-14.5) | 12.9<br>(11.6-14.0) | 12.7<br>(11.6-13.7) | 12.6<br>(11.5-13.6) | 12.8<br>(11.8-14.2) | 13.2<br>(12.1-15.7) |
| Jordan                      | 12.8<br>(11.7-13.7) | 13.1<br>(12.0-13.9) | 13.4<br>(12.1-14.3) | 14.5<br>(13.4-15.3) | 15.6<br>(14.6-16.2) | 15.8<br>(14.7-16.7) | 15.9<br>(14.1-17.2) | 15.6<br>(14.1-17.0) | 16.5<br>(14.8-18.2) | 16.9<br>(14.7-19.2) |
| Kuwait                      | 13.7<br>(12.7-14.8) | 14.0<br>(13.0-14.9) | 14.8<br>(13.9-15.7) | 15.5<br>(14.5-16.6) | 16.7<br>(15.4-18.0) | 16.7<br>(15.6-17.7) | 17.2<br>(16.3-18.3) | 17.9<br>(16.8-19.0) | 19.0<br>(17.9-20.1) | 19.8<br>(17.4-22.4) |
| Lebanon                     | 13.8<br>(12.3-15.2) | 13.4<br>(11.9-14.7) | 12.6<br>(11.2-14.3) | 13.1<br>(12.2-15.0) | 13.8<br>(13.0-15.5) | 16.1<br>(15.7-16.7) | 17.4<br>(16.3-18.3) | 18.1<br>(17.0-19.3) | 18.8<br>(17.9-19.7) | 18.6<br>(17.3-19.7) |
| Libya                       | 15.9<br>(15.0-16.8) | 16.0<br>(15.2-16.8) | 16.1<br>(15.1-16.8) | 15.9<br>(15.2-16.8) | 15.9<br>(15.4-16.7) | 16.3<br>(15.7-17.0) | 16.4<br>(15.9-17.0) | 16.5<br>(16.0-17.1) | 16.3<br>(15.0-17.3) | 15.4<br>(14.7-16.8) |
| Morocco                     | 12.9<br>(12.5-13.4) | 13.1<br>(12.7-13.6) | 13.4<br>(13.0-13.8) | 13.9<br>(13.6-14.3) | 14.3<br>(13.9-14.6) | 14.7<br>(14.4-15.0) | 15.2<br>(14.9-15.5) | 15.7<br>(15.3-16.0) | 16.1<br>(15.8-16.5) | 16.5<br>(16.0-16.9) |
| Palestine                   | 13.6<br>(12.6-15.0) | 14.0<br>(12.8-15.3) | 14.4<br>(13.4-16.0) | 14.3<br>(13.3-15.7) | 14.3<br>(13.5-15.4) | 14.0<br>(13.4-14.8) | 12.9<br>(12.7-13.1) | 12.8<br>(12.6-12.9) | 13.0<br>(12.9-13.2) | 12.9<br>(12.6-13.3) |
| Oman                        | 14.1<br>(13.5-14.8) | 14.5<br>(13.9-15.1) | 14.7<br>(14.2-15.4) | 14.9<br>(14.3-15.7) | 15.2<br>(14.7-15.6) | 15.7<br>(15.3-16.1) | 15.3<br>(14.5-16.2) | 15.4<br>(14.8-16.0) | 15.3<br>(14.7-15.9) | 16.0<br>(15.7-16.5) |
| Qatar                       | 13.9<br>(11.6-16.4) | 14.0<br>(11.9-16.3) | 13.5<br>(11.9-15.5) | 15.8<br>(13.7-16.8) | 17.0<br>(15.7-18.4) | 16.5<br>(14.9-17.9) | 16.3<br>(14.6-17.9) | 16.6<br>(14.9-18.5) | 18.3<br>(16.6-20.0) | 18.6<br>(16.1-21.3) |
| Saudi Arabia                | 16.2<br>(15.3-17.2) | 16.6<br>(15.7-17.6) | 16.8<br>(15.9-17.7) | 16.3<br>(15.5-17.2) | 15.7<br>(15.0-16.5) | 15.6<br>(15.0-16.1) | 15.2<br>(14.8-15.6) | 15.1<br>(14.7-15.4) | 15.4<br>(15.0-15.8) | 16.2<br>(15.6-16.8) |
| Sudan                       | 12.4<br>(12.0-12.6) | 12.4<br>(12.1-12.6) | 12.6<br>(12.3-12.8) | 12.0<br>(11.5-12.6) | 13.1<br>(12.8-13.4) | 13.2<br>(12.9-13.6) | 13.4<br>(13.1-13.8) | 13.7<br>(13.4-14.2) | 14.2<br>(13.8-14.6) | 14.7<br>(14.2-15.1) |
| Syria                       | 13.9<br>(13.4-14.4) | 13.9<br>(13.5-14.4) | 14.3<br>(13.9-14.7) | 14.7<br>(14.4-15.1) | 15.0<br>(14.7-15.3) | 15.2<br>(14.0-15.7) | 14.8<br>(14.3-15.6) | 15.6<br>(15.1-16.1) | 16.0<br>(15.5-16.7) | 15.0<br>(14.3-15.9) |
| Tunisia                     | 12.9<br>(12.4-13.4) | 13.2<br>(12.7-13.7) | 12.8<br>(12.2-13.5) | 14.5<br>(13.8-15.3) | 14.6<br>(14.0-15.3) | 14.4<br>(13.8-15.1) | 15.7<br>(15.1-16.6) | 16.2<br>(15.5-17.3) | 16.5<br>(14.9-17.7) | 16.1<br>(14.6-18.0) |
| Turkey                      | 13.2<br>(12.0-14.9) | 13.8<br>(12.8-14.9) | 14.6<br>(13.7-15.5) | 15.6<br>(14.7-16.4) | 15.8<br>(15.3-16.2) | 15.0<br>(14.6-15.4) | 15.8<br>(15.4-16.1) | 16.7<br>(16.2-17.2) | 17.1<br>(16.4-17.8) | 17.3<br>(15.9-18.7) |
| United Arab Emirates        | 15.7<br>(14.1-17.7) | 15.8<br>(14.2-18.0) | 15.8<br>(14.4-17.8) | 15.8<br>(13.8-17.5) | 15.3<br>(13.4-17.0) | 15.0<br>(13.9-16.6) | 15.4<br>(14.5-16.4) | 16.3<br>(15.8-16.6) | 16.1<br>(15.2-16.8) | 16.0<br>(14.8-17.0) |
| Yemen                       | 11.3<br>(10.9-11.7) | 11.9<br>(11.5-12.3) | 11.9<br>(11.9-12.7) | 12.4<br>(12.3-13.2) | 12.4<br>(12.6-13.6) | 13.2<br>(12.8-13.7) | 13.2<br>(13.0-13.9) | 13.4<br>(13.5-14.3) | 14.6<br>(13.9-15.0) | 14.5<br>(13.6-15.4) |
| South Asia                  | 10.9<br>(10.7-11.1) | 11.2<br>(11.0-11.4) | 11.7<br>(11.5-11.8) | 11.7<br>(11.7-12.1) | 11.9<br>(12.0-12.3) | 12.1<br>(12.2-12.5) | 12.6<br>(12.5-12.8) | 13.1<br>(12.9-13.3) | 13.4<br>(13.2-13.5) | 13.8<br>(13.6-14.0) |
| South Asia                  | 11.9<br>(10.7-11.1) | 12.9<br>(11.0-11.4) | 12.9<br>(11.5-11.8) | 12.9<br>(11.7-12.1) | 12.7<br>(12.0-12.3) | 12.8<br>(12.2-12.5) | 13.4<br>(12.5-12.8) | 14.1<br>(12.9-13.3) | 14.5<br>(13.2-13.5) | 15.3<br>(13.6-14.0) |
| Bangladesh                  | 10.9<br>(10.9-13.1) | 12.9<br>(12.1-13.9) | 12.9<br>(12.3-13.7) | 12.9<br>(12.2-13.2) | 12.9<br>(12.3-13.4) | 12.8<br>(12.9-14.1) | 13.4<br>(13.6-14.7) | 14.1<br>(14.0-14.9) | 14.5<br>(14.4-15.4) | 15.3<br>(14.5-16.1) |
| Bhutan                      | 13.2<br>(12.2-14.4) | 13.4<br>(12.4-14.6) | 13.5<br>(12.4-14.7) | 13.8<br>(12.7-15.0) | 14.3<br>(13.1-15.3) | 14.7<br>(13.7-15.6) | 15.4<br>(14.5-16.2) | 15.9<br>(15.0-16.8) | 16.2<br>(15.2-17.1) | 16.3<br>(15.2-17.4) |
| India                       | 10.5<br>(10.3-10.7) | 11.2<br>(10.5-11.0) | 11.2<br>(11.1-11.5) | 11.6<br>(11.4-11.8) | 11.8<br>(11.6-12.0) | 12.1<br>(11.9-12.3) | 12.4<br>(12.2-12.6) | 12.9<br>(12.7-13.1) | 13.1<br>(12.9-13.3) | 13.6<br>(13.4-13.8) |
| Nepal                       | 12.3<br>(11.9-12.7) | 12.4<br>(11.9-12.8) | 12.5<br>(11.9-12.8) | 12.5<br>(12.1-12.9) | 12.7<br>(12.3-13.1) | 12.8<br>(12.5-13.3) | 13.2<br>(12.9-13.5) | 13.9<br>(13.5-14.2) | 14.2<br>(13.7-14.8) | 14.7<br>(14.0-15.6) |
| Pakistan                    | 13.6<br>(12.6-14.8) | 13.9<br>(12.9-14.9) | 14.1<br>(13.3-14.9) | 14.3<br>(13.8-14.9) | 14.1<br>(13.6-14.6) | 13.4<br>(12.9-13.9) | 13.2<br>(12.8-13.7) | 13.2<br>(12.7-13.7) | 13.7<br>(13.1-14.3) | 14.1<br>(13.2-14.9) |
| Sub-Saharan Africa          | 12.3<br>(12.1-12.6) | 12.5<br>(12.2-12.7) | 12.6<br>(12.3-12.8) | 12.6<br>(12.5-12.8) | 12.6<br>(12.4-12.8) | 12.5<br>(12.3-12.7) | 12.3<br>(12.1-12.5) | 12.3<br>(12.4-12.8) | 13.1<br>(12.9-13.3) | 13.7<br>(13.4-14.0) |
| Southern Sub-Saharan Africa | 14.0<br>(13.4-14.6) | 14.3<br>(13.8-14.9) | 14.4<br>(14.0-14.9) | 14.7<br>(14.4-15.0) | 14.9<br>(14.5-15.5) | 13.9<br>(13.4-14.4) | 11.7<br>(11.4-12.1) | 11.7<br>(11.4-11.8) | 12.0<br>(11.8-12.3) | 13.4<br>(13.1-13.8) |
| Botswana                    | 10.3<br>(9.9-10.9)  | 10.9<br>(10.5-11.6) | 11.3<br>(10.8-12.1) | 12.1<br>(11.3-13.0) | 11.5<br>(11.2-14.0) | 11.0<br>(9.4-15.6)  | 10.0<br>(7.7-13.1)  | 10.3<br>(8.6-12.7)  | 11.6<br>(10.1-13.4) | 12.8<br>(11.3-15.9) |
| Lesotho                     | 10.2<br>(9.1-11.7)  | 10.4<br>(9.3-12.1)  | 10.8<br>(9.6-12.4)  | 11.0<br>(10.0-12.5) | 11.0<br>(10.2-12.3) | 11.0<br>(9.9-11.7)  | 9.3<br>(8.8-10.2)   | 9.0<br>(8.1-9.3)    | 9.4<br>(8.4-9.6)    | 9.4<br>(8.6-10.4)   |
| Namibia                     | 11.4<br>(10.5-12.5) | 11.6<br>(10.7-12.6) | 11.5<br>(10.7-12.3) | 11.4<br>(10.8-12.1) | 11.3<br>(10.8-12.1) | 11.1<br>(10.6-12.1) | 11.1<br>(9.7-11.5)  | 10.4<br>(9.7-11.9)  | 10.4<br>(11.0-13.4) | 12.7<br>(11.7-14.2) |
| South Africa                | 15.0<br>(14.5-15.9) | 15.3<br>(14.6-16.0) | 15.3<br>(14.8-15.9) | 15.4<br>(15.0-15.8) | 15.4<br>(15.1-15.8) | 14.4<br>(14.2-14.7) | 12.3<br>(12.2-12.5) | 12.3<br>(12.2-12.5) | 12.7<br>(12.5-12.8) | 12.7<br>(13.8-14.5) |
| Swaziland                   | 10.9<br>(9.6-12.0)  | 11.4<br>(9.9-12.2)  | 11.5<br>(10.1-12.4) | 11.5<br>(10.2-12.7) | 11.5<br>(10.5-12.8) | 11.5<br>(10.3-13.1) | 9.8<br>(8.6-12.1)   | 9.8<br>(8.1-10.4)   | 9.6<br>(8.8-11.4)   | 11.1<br>(9.9-13.4)  |
| Zimbabwe                    | 11.3<br>(10.2-12.5) | 11.8<br>(10.6-12.7) | 12.2<br>(11.2-12.9) | 13.1<br>(12.7-13.5) | 13.1<br>(12.9-13.3) | 13.2<br>(11.1-16.1) | 10.5<br>(9.3-12.2)  | 9.6<br>(9.0-10.4)   | 10.2<br>(9.5-11.4)  | 11.6<br>(10.5-13.1) |
| Western Sub-Saharan Africa  | 13.0<br>(12.5-13.5) | 13.2<br>(12.8-13.7) | 13.5<br>(13.0-13.9) | 13.5<br>(13.1-14.0) | 13.4<br>(13.0-13.8) | 13.4<br>(12.9-13.9) | 13.4<br>(12.9-13.8) | 13.4<br>(13.2-14.1) | 14.6<br>(13.6-14.5) | 14.6<br>(14.0-15.1) |
| Benin                       | 12.1<br>(11.7-12.6) | 12.2<br>(11.8-12.7) | 12.3<br>(11.9-12.7) | 12.6<br>(12.3-13.0) | 12.7<br>(12.3-13.1) | 12.6<br>(12.1-13.1) | 12.5<br>(12.2-13.0) | 12.7<br>(12.4-13.1) | 12.9<br>(12.6-13.3) | 13.3<br>(13.0-13.8) |
| Burkina Faso                | 11.7<br>(11.5-12.0) | 11.8<br>(11.6-12.0) | 11.9<br>(11.7-12.2) | 12.3<br>(12.0-12.6) | 12.2<br>(11.7-13.2) | 12.2<br>(11.6-12.9) | 12.3<br>(11.8-12.7) | 12.7<br>(12.3-13.0) | 12.9<br>(12.6-13.2) | 13.2<br>(12.9-13.5) |
| Cameroon                    | 12.6<br>(11.9-13.4) | 12.8<br>(12.2-13.6) | 13.1<br>(12.5-13.8) | 13.3<br>(12.8-14.0) | 13.2<br>(12.6-14.0) | 12.7<br>(12.2-13.7) | 12.2<br>(11.7-12.9) | 12.3<br>(11.7-12.8) | 12.6<br>(12.0-13.2) | 12.9<br>(12.1-13.8) |
| Cape Verde                  | 13.7<br>(12.4-15.4) | 13.9<br>(12.8-15.1) | 13.6<br>(12.9-14.5) | 13.7<br>(13.1-14.5) | 13.6<br>(13.3-14.2) | 13.6<br>(12.8-14.4) | 13.7<br>(12.4-15.0) | 13.4<br>(12.5-15.4) | 13.4<br>(12.9-14.3) | 14.0<br>(13.2-15.0) |
| Chad                        | 12.6<br>(12.1-13.1) | 12.7<br>(12.2-13.3) | 12.6<br>(12.2-13.1) | 12.8<br>(12.3-13.3) | 12.8<br>(12.4-13.2) | 12.6<br>(12.0-13.0) | 12.1<br>(11.7-12.7) | 12.5<br>(11.9-13.1) | 12.7<br>(12.2-13.3) | 13.1<br>(12.6-14.0) |
| Cote d'Ivoire               | 12.2<br>(11.7-12.7) | 12.3<br>(11.9-12.7) | 12.8<br>(12.3-13.1) | 12.6<br>(12.1-13.0) | 12.0<br>(11.6-12.3) | 11.4<br>(10.7-11.9) | 11.5<br>(10.9-12.0) | 11.8<br>(11.0-12.2) | 12.1<br>(11.4-12.6) | 12.6<br>(11.7-13.1) |
| The Gambia                  | 13.4<br>(12.6-14.3) | 13.5<br>(12.8-14.4) | 13.7<br>(13.0-14.5) | 13.9<br>(13.1-14.7) | 14.0<br>(13.2-14.7) | 14.0<br>(13.3-14.8) | 13.8<br>(13.2-14.6) | 13.7<br>(13.3-14.4) | 14.1<br>(13.6-14.6) | 14.5<br>(13.8-15.1) |
| Ghana                       | 13.0<br>(12.3-13.8) | 13.1<br>(12.4-14.0) | 13.2<br>(12.5-14.0) | 13.1<br>(12.4-14.0) | 13.0<br>(12.5-13.8) | 13.2<br>(12.6-14.0) | 12.9<br>(12.5-13.5) | 12.9<br>(12.6-13.3) | 13.2<br>(12.8-13.6) | 13.9<br>(13.2-14.6) |
| Guinea                      | 13.0<br>(12.1-14.1) | 13.1<br>(12.3-14.2) | 13.4<br>(12.6-14.3) | 13.7<br>(13.0-14.6) | 13.7<br>(13.1-14.4) | 13.3<br>(12.7-13.9) | 12.8<br>(12.3-13.4) | 12.8<br>(12.2-13.5) | 12.8<br>(12.3-13.5) | 13.1<br>(12.5-13.9) |
| Guinea-Bissau               | 10.4<br>(9.8-11.0)  | 10.7<br>(10.1-11.3) | 10.8<br>(10.2-11.4) | 10.8<br>(10.1-11.4) | 10.8<br>(10.1-11.5) | 10.8<br>(10.1-11.5) | 10.8<br>(10.0-11.6) | 10.8<br>(10.0-11.8) | 10.9<br>(10.2-11.9) | 11.1<br>(10.4-12.2) |
| Liberia                     | 13.3<br>(12.7-14.1) | 13.6<br>(13.0-14.3) | 13.7<br>(13.1-14.3) | 13.6<br>(13.0-14.2) | 13.3<br>(12.8-13.9) | 13.1<br>(12.6-13.7) | 13.2<br>(12.7-13.9) | 13.5<br>(12.8-14.1) | 13.3<br>(12.9-13.9) | 13.9<br>(13.5-14.3) |
| Mali                        | 11.4<br>(10.6-12.3) | 11.4<br>(10.7-12.1) | 11.8<br>(11.2-12.5) | 12.2<br>(11.7-12.7) | 12.6<br>(12.2-13.2) | 13.1<br>(12.5-13.7) | 13.9<br>(13.3-14.5) | 14.1<br>(13.4-14.8) | 14.4<br>(13.4-15.2) | 14.7<br>(13.4-16.0) |
| Mauritania                  | 12.4<br>(11.3-13.9) | 12.5<br>(11.5-13.8) | 12.7<br>(11.9-13.8) | 12.8<br>(12.3-13.6) | 13.1<br>(12.7-13.9) | 13.6<br>(12.9-14.3) | 14.6<br>(13.8-15.4) | 15.3<br>(14.5-16.3) | 15.9<br>(14.8-17.2) | 16.1<br>(14.8-17.9) |
| Niger                       | 11.8<br>(11.0-12.7) | 11.7<br>(11.1-12.4) | 11.8<br>(11.2-12.4) | 11.9<br>(11.4-12.5) | 12.7<br>(12.1-13.5) | 13.2<br>(12.6-13.9) | 13.4<br>(12.8-14.1) | 13.4<br>(12.8-14.1) | 13.4<br>(12.6-14.2) | 13.5<br>(12.7-14.5) |
| Nigeria                     | 13.9<br>(12.8-15.0) | 14.3<br>(13.3-15.5) | 14.7<br>(13.6-15.9) | 14.7<br>(13.7-15.7) | 14.3<br>(13.3-15.4) | 14.4<br>(13.4-16.0) | 14.3<br>(13.3-15.6) | 14.8<br>(13.9-16.1) | 15.6<br>(14.6-16.9) | 16.3<br>(15.0-17.8) |
| Sao Tome and Principe       | 12.8<br>(12.3-13.2) | 13.2<br>(12.7-13.8) | 13.8<br>(13.3-14.4) | 14.1<br>(13.4-14.7) | 14.0<br>(13.4-14.8) | 14.1<br>(13.4-14.9) | 13.7<br>(13.3-14.4) | 13.9<br>(13.5-14.4) | 14.6<br>(13.8-15.2) | 14.6<br>(13.2-16.0) |
| Senegal                     | 11.8<br>(11.4-12.3) | 11.8<br>(11.4-12.3) | 12.1<br>(11.7-12.5) | 12.1<br>(12.1-12.9) | 12.6<br>(12.3-13.1) | 12.7<br>(12.4-13.1) | 12.8<br>(12.5-13.2) | 12.8<br>(12.8-13.4) | 13.0<br>(13.1-13.6) | 13.6<br>(13.0-14.3) |
| Sierra Leone                | 12.0<br>(11.4-12.7) | 12.1<br>(11.5-12.8) | 12.3<br>(11.6-13.0) | 12.3<br>(11.7-12.9) | 12.3<br>(11.8-13.0) | 12.0<br>(11.6-12.6) | 12.0<br>(11.6-12.5) | 12.0<br>(11.7-12.4) | 12.0<br>(12.0-12.9) | 12.9<br>(12.4-13.5) |
| Togo                        | 12.5<br>(12.0-13.1) | 12.7<br>(12.2-13.4) | 12.9<br>(12.3-13.4) | 12.9<br>(12.3-13.3) | 12.8<br>(12.3-13.3) | 12.8<br>(12.2-13.0) | 12.4<br>(11.6-12.6) | 12.2<br>(11.5-12.6) | 12.2<br>(11.5-12.8) | 13.2<br>(11.9-13.4) |
| Eastern Sub-Saharan Africa  | 11.3<br>(10.9-11.7) | 11.4<br>(11.0-11.8) | 11.4<br>(11.0-11.8) | 11.4<br>(11.2-11.7) | 11.4<br>(11.2-11.7) | 11.5<br>(11.2-11.8) | 11.7<br>(11.5-12.0) | 11.7<br>(11.9-12.4) | 12.2<br>(13.3-13.0) | 12.7<br>(12.7-13.6) |
| Burundi                     | 9.7<br>(9.0-10.5)   | 9.7<br>(9.0-10.6)   | 9.7<br>(8.9-10.7)   | 9.7<br>(8.6-10.6)   | 9.4<br>(8.7-10.7)   | 9.5<br>(8.7-10.7)   | 10.1<br>(8.6-10.3)  | 1                   |                     |                     |

Appendix Table 14B. Estimates of life expectancy at age 65 by location, males, 1970, 1975, 1980, 1985, 1990, 1995, 2000, 2005, 2010, 2016

| Location                         | 1970                | 1975                | 1980                | 1985                | 1990                | 1995                | 2000                | 2005                | 2010                | 2016                |
|----------------------------------|---------------------|---------------------|---------------------|---------------------|---------------------|---------------------|---------------------|---------------------|---------------------|---------------------|
| Djibouti                         | 13.1<br>(12.4-13.8) | 13.2<br>(12.6-14.0) | 13.1<br>(12.6-13.8) | 13.0<br>(12.5-13.5) | 12.9<br>(12.6-13.4) | 12.9<br>(12.5-13.4) | 13.0<br>(12.5-13.9) | 13.1<br>(12.4-13.8) | 13.4<br>(12.5-14.1) | 13.9<br>(12.9-15.0) |
| Eritrea                          | 9.5<br>(8.8-10.3)   | 9.6<br>(9.0-10.3)   | 9.7<br>(9.2-10.3)   | 9.8<br>(9.3-10.5)   | 10.6<br>(10.0-11.3) | 11.9<br>(11.1-12.5) | 12.4<br>(11.5-12.9) | 12.6<br>(11.6-13.2) | 12.6<br>(11.5-13.5) | 12.8<br>(11.7-13.7) |
| Ethiopia                         | 9.4<br>(8.5-10.5)   | 9.3<br>(8.4-10.3)   | 9.3<br>(8.5-10.2)   | 9.3<br>(8.7-10.1)   | 9.8<br>(9.2-10.5)   | 10.8<br>(10.1-11.4) | 11.6<br>(10.9-12.1) | 12.3<br>(11.6-12.7) | 13.0<br>(11.9-13.6) | 13.3<br>(12.0-14.8) |
| Kenya                            | 13.4<br>(13.1-13.7) | 13.7<br>(13.4-13.9) | 14.0<br>(13.7-14.2) | 14.1<br>(13.8-14.3) | 13.7<br>(13.4-14.1) | 13.1<br>(12.8-13.5) | 12.8<br>(12.4-13.1) | 13.0<br>(12.7-13.3) | 13.7<br>(13.4-14.0) | 14.1<br>(13.8-14.5) |
| Madagascar                       | 11.3<br>(10.5-11.8) | 11.9<br>(11.2-12.5) | 12.4<br>(11.9-13.0) | 12.2<br>(11.9-12.8) | 12.1<br>(11.8-12.4) | 12.3<br>(12.0-12.7) | 12.5<br>(12.1-12.9) | 12.7<br>(12.1-13.3) | 12.9<br>(11.9-13.8) | 13.0<br>(11.5-14.3) |
| Malawi                           | 12.7<br>(12.1-13.4) | 12.8<br>(12.2-13.5) | 13.0<br>(12.4-13.6) | 13.2<br>(12.4-14.2) | 13.3<br>(11.8-16.2) | 12.2<br>(10.9-14.0) | 11.3<br>(10.1-13.0) | 11.4<br>(10.2-13.2) | 12.1<br>(10.8-13.1) | 12.9<br>(11.4-14.1) |
| Mozambique                       | 11.9<br>(11.5-12.4) | 12.2<br>(11.6-12.6) | 12.2<br>(11.7-12.6) | 11.6<br>(11.1-12.1) | 11.9<br>(11.5-12.3) | 12.0<br>(11.5-12.7) | 11.8<br>(11.1-12.9) | 12.0<br>(11.0-12.9) | 12.2<br>(11.0-13.1) | 13.0<br>(11.8-14.0) |
| Rwanda                           | 11.4<br>(10.5-12.3) | 11.5<br>(10.6-12.4) | 11.8<br>(11.1-12.6) | 11.8<br>(11.2-12.5) | 10.7<br>(9.8-11.6)  | 9.1<br>(8.6-9.8)    | 10.8<br>(10.0-11.5) | 12.8<br>(12.4-13.6) | 13.8<br>(13.4-14.3) | 14.3<br>(13.2-15.2) |
| Somalia                          | 11.4<br>(10.7-12.1) | 11.1<br>(10.5-11.7) | 11.6<br>(11.0-12.2) | 11.6<br>(10.9-12.2) | 11.6<br>(10.9-12.2) | 11.5<br>(10.8-12.1) | 11.4<br>(10.6-12.1) | 11.6<br>(10.7-12.3) | 11.5<br>(10.5-12.2) | 11.9<br>(10.8-12.7) |
| South Sudan                      | 12.6<br>(12.0-13.5) | 12.8<br>(12.1-13.7) | 12.9<br>(12.1-13.7) | 12.9<br>(12.1-13.8) | 12.7<br>(11.8-13.9) | 12.6<br>(11.6-14.0) | 12.5<br>(11.6-13.8) | 12.7<br>(11.9-13.8) | 12.9<br>(12.0-14.1) | 12.9<br>(12.0-13.9) |
| Tanzania                         | 12.6<br>(12.1-13.1) | 12.8<br>(12.4-13.5) | 13.0<br>(12.6-13.7) | 13.2<br>(12.7-13.8) | 12.7<br>(12.1-13.5) | 12.4<br>(11.8-13.5) | 12.4<br>(11.9-13.4) | 12.7<br>(12.3-13.5) | 13.1<br>(12.5-13.6) | 13.6<br>(12.4-14.4) |
| Uganda                           | 11.6<br>(11.0-12.1) | 11.7<br>(11.3-12.2) | 11.6<br>(11.2-12.1) | 11.6<br>(11.3-12.0) | 11.3<br>(10.6-12.1) | 11.0<br>(10.1-11.7) | 11.2<br>(10.6-11.8) | 11.7<br>(10.8-12.3) | 12.3<br>(11.5-12.9) | 12.8<br>(11.7-13.5) |
| Zambia                           | 14.0<br>(12.1-16.4) | 14.1<br>(12.4-16.2) | 14.3<br>(12.9-16.3) | 15.0<br>(13.3-17.3) | 14.3<br>(13.1-15.2) | 11.8<br>(11.0-12.7) | 10.2<br>(9.2-11.5)  | 9.4<br>(8.8-10.4)   | 10.1<br>(9.4-11.1)  | 11.0<br>(9.9-12.9)  |
| Central Sub-Saharan Africa       | 11.1<br>(10.8-11.5) | 11.3<br>(10.9-11.6) | 11.3<br>(11.0-11.7) | 11.4<br>(11.0-11.7) | 11.3<br>(11.0-11.7) | 11.3<br>(11.0-11.6) | 11.5<br>(11.2-11.8) | 12.0<br>(11.7-12.3) | 12.4<br>(12.0-12.7) | 12.9<br>(12.4-13.3) |
| Angola                           | 10.6<br>(9.5-11.7)  | 10.8<br>(9.7-11.8)  | 10.8<br>(9.7-11.8)  | 10.7<br>(9.6-11.7)  | 10.8<br>(9.6-11.9)  | 11.1<br>(9.8-12.2)  | 11.8<br>(10.5-12.9) | 12.4<br>(11.2-13.6) | 13.0<br>(11.8-14.3) | 13.6<br>(12.0-15.0) |
| Central African Republic         | 9.1<br>(8.5-10.3)   | 9.2<br>(8.6-10.2)   | 9.5<br>(8.8-10.3)   | 9.5<br>(8.9-10.1)   | 9.2<br>(8.6-9.8)    | 8.9<br>(8.3-10.0)   | 8.8<br>(8.1-10.0)   | 8.9<br>(8.2-10.2)   | 9.2<br>(8.4-10.7)   | 9.4<br>(8.6-10.8)   |
| Congo                            | 9.8<br>(8.8-11.4)   | 10.1<br>(9.0-11.7)  | 10.2<br>(9.2-11.8)  | 10.3<br>(9.4-11.6)  | 9.9<br>(9.3-10.9)   | 10.1<br>(9.4-11.1)  | 11.2<br>(10.2-12.3) | 12.8<br>(12.0-13.2) | 13.6<br>(12.8-14.7) | 13.9<br>(12.4-15.5) |
| Democratic Republic of the Congo | 11.9<br>(11.6-12.3) | 12.0<br>(11.7-12.4) | 12.0<br>(11.7-12.5) | 12.1<br>(11.8-12.5) | 12.1<br>(11.8-12.5) | 11.9<br>(11.7-12.2) | 11.8<br>(11.5-12.1) | 11.8<br>(11.9-12.4) | 12.2<br>(12.0-12.7) | 12.9<br>(12.4-13.3) |
| Equatorial Guinea                | 9.3<br>(8.5-10.5)   | 9.4<br>(8.6-10.6)   | 9.7<br>(8.8-11.0)   | 9.9<br>(9.0-11.3)   | 10.0<br>(9.0-11.3)  | 10.6<br>(9.3-11.7)  | 12.4<br>(11.0-14.1) | 14.0<br>(12.3-16.3) | 14.8<br>(12.8-17.1) | 15.3<br>(13.3-18.0) |
| Gabon                            | 10.4<br>(9.1-11.9)  | 10.7<br>(9.3-12.2)  | 10.9<br>(9.7-12.4)  | 10.8<br>(9.9-12.0)  | 10.8<br>(10.1-11.8) | 11.0<br>(10.3-12.2) | 12.1<br>(10.7-13.1) | 13.0<br>(11.7-13.6) | 13.6<br>(12.6-14.6) | 14.3<br>(12.6-16.0) |



Appendix Table 14C. Estimates of life expectancy at age 65 by location, females, 1970, 1975, 1980, 1985, 1990, 1995, 2000, 2005, 2010, 2016

| Location                  | 1970                | 1975                | 1980                | 1985                | 1990                | 1995                | 2000                | 2005                | 2010                | 2016                |
|---------------------------|---------------------|---------------------|---------------------|---------------------|---------------------|---------------------|---------------------|---------------------|---------------------|---------------------|
| Global                    | 14.5<br>(14.4-14.5) | 14.9<br>(14.8-15.0) | 15.3<br>(15.2-15.4) | 15.5<br>(15.5-15.6) | 15.9<br>(15.8-16.0) | 16.1<br>(16.0-16.2) | 16.5<br>(16.4-16.6) | 17.1<br>(17.0-17.2) | 17.8<br>(17.8-17.9) | 18.6<br>(18.4-18.7) |
| High SDI                  | 16.0<br>(15.9-16.1) | 16.6<br>(16.6-16.7) | 17.4<br>(17.3-17.5) | 17.9<br>(17.8-18.0) | 18.6<br>(18.5-18.6) | 19.1<br>(19.0-19.2) | 19.7<br>(19.7-19.8) | 20.5<br>(20.5-20.6) | 21.3<br>(21.2-21.4) | 21.7<br>(21.5-21.8) |
| High-middle SDI           | 15.4<br>(15.4-15.9) | 15.7<br>(15.4-15.9) | 15.8<br>(15.6-16.1) | 16.0<br>(15.7-16.2) | 16.3<br>(16.1-16.6) | 16.0<br>(15.8-16.2) | 16.6<br>(16.3-16.8) | 17.1<br>(16.8-17.3) | 18.2<br>(18.0-18.4) | 19.2<br>(18.3-19.9) |
| Middle SDI                | 13.7<br>(13.5-13.9) | 14.1<br>(13.9-14.3) | 14.3<br>(14.1-14.5) | 14.7<br>(14.5-14.8) | 14.9<br>(14.8-15.1) | 15.3<br>(15.1-15.4) | 15.7<br>(15.6-15.9) | 16.4<br>(16.3-16.5) | 17.2<br>(17.1-17.4) | 18.3<br>(18.1-18.4) |
| Low-middle SDI            | 11.4<br>(11.3-11.6) | 11.8<br>(11.6-12.0) | 12.2<br>(12.1-12.4) | 12.5<br>(12.4-12.7) | 12.9<br>(12.7-13.0) | 13.1<br>(13.0-13.3) | 13.5<br>(13.3-13.7) | 14.1<br>(13.9-14.3) | 14.7<br>(14.5-14.9) | 15.4<br>(15.1-15.6) |
| Low SDI                   | 11.0<br>(10.7-11.3) | 11.2<br>(10.9-11.4) | 11.4<br>(11.1-11.6) | 11.5<br>(11.3-11.7) | 11.6<br>(11.4-11.8) | 11.6<br>(11.4-11.8) | 11.8<br>(11.5-12.0) | 12.2<br>(11.9-12.5) | 12.6<br>(12.4-13.0) | 13.3<br>(13.0-13.6) |
| High-income               | 16.1<br>(16.0-16.2) | 16.7<br>(16.6-16.8) | 17.5<br>(17.5-17.6) | 18.1<br>(18.0-18.2) | 18.8<br>(18.7-18.8) | 19.3<br>(19.3-19.4) | 19.9<br>(19.9-20.0) | 20.7<br>(20.7-20.8) | 21.4<br>(21.4-21.5) | 21.8<br>(21.7-21.9) |
| High-income North America | 16.9<br>(16.9-17.0) | 17.8<br>(17.7-17.9) | 18.5<br>(18.4-18.6) | 18.7<br>(18.6-18.8) | 19.1<br>(19.0-19.2) | 19.2<br>(19.1-19.2) | 19.3<br>(19.2-19.3) | 19.9<br>(19.8-19.9) | 20.6<br>(20.5-20.7) | 20.7<br>(20.6-20.9) |
| Canada                    | 17.5<br>(17.3-17.7) | 18.0<br>(17.8-18.2) | 18.8<br>(18.6-19.1) | 19.2<br>(19.0-19.5) | 19.7<br>(19.5-19.9) | 19.9<br>(19.6-20.1) | 20.3<br>(20.1-20.5) | 20.9<br>(20.7-21.1) | 21.6<br>(21.4-21.8) | 22.0<br>(21.7-22.3) |
| Greenland                 | 11.7<br>(11.2-12.3) | 10.5<br>(10.1-11.1) | 11.0<br>(10.5-11.5) | 10.5<br>(10.1-11.0) | 11.3<br>(10.7-11.9) | 11.3<br>(10.8-12.0) | 11.3<br>(10.9-11.9) | 11.6<br>(11.1-12.2) | 12.9<br>(12.2-13.6) | 14.2<br>(12.8-15.9) |
| United States             | 16.9<br>(16.8-17.0) | 17.8<br>(17.7-17.9) | 18.5<br>(18.4-18.6) | 18.6<br>(18.6-18.7) | 19.0<br>(19.0-19.1) | 19.1<br>(19.0-19.2) | 19.2<br>(19.1-19.2) | 19.8<br>(19.7-19.8) | 20.5<br>(20.4-20.6) | 20.6<br>(20.4-20.8) |
| Australasia               | 16.0<br>(15.9-16.2) | 16.9<br>(16.7-17.0) | 17.8<br>(17.7-18.0) | 18.2<br>(18.1-18.4) | 18.9<br>(18.8-19.1) | 19.6<br>(19.5-19.8) | 20.5<br>(20.3-20.7) | 21.3<br>(21.1-21.4) | 21.8<br>(21.7-22.0) | 22.1<br>(21.7-22.6) |
| Australia                 | 16.0<br>(15.8-16.2) | 16.9<br>(16.7-17.1) | 18.0<br>(17.8-18.2) | 18.4<br>(18.2-18.5) | 19.1<br>(18.9-19.2) | 19.7<br>(19.6-19.9) | 20.6<br>(20.4-20.8) | 21.4<br>(21.2-21.6) | 21.9<br>(21.8-22.1) | 22.2<br>(21.7-22.7) |
| New Zealand               | 16.1<br>(15.9-16.3) | 16.6<br>(16.4-16.8) | 17.1<br>(16.9-17.4) | 17.6<br>(17.3-17.8) | 18.4<br>(18.2-18.7) | 19.1<br>(18.8-19.3) | 19.9<br>(19.7-20.2) | 20.5<br>(20.2-20.7) | 21.1<br>(20.9-21.3) | 21.5<br>(20.7-22.4) |
| High-income Asia Pacific  | 15.4<br>(14.9-15.9) | 16.2<br>(15.9-16.6) | 17.4<br>(17.3-17.6) | 18.5<br>(18.4-18.7) | 19.5<br>(19.3-19.6) | 20.4<br>(20.3-20.6) | 21.6<br>(21.4-21.7) | 22.6<br>(22.4-22.7) | 23.3<br>(23.2-23.5) | 23.8<br>(23.3-24.2) |
| Brunei                    | 13.6<br>(12.9-15.1) | 14.6<br>(14.0-15.9) | 14.7<br>(13.6-15.4) | 16.1<br>(15.3-16.6) | 16.8<br>(16.0-17.5) | 17.3<br>(16.4-18.0) | 18.3<br>(17.9-18.8) | 18.7<br>(18.2-19.0) | 18.9<br>(18.4-19.2) | 18.9<br>(18.2-20.2) |
| Japan                     | 15.6<br>(15.3-15.8) | 16.6<br>(16.4-16.8) | 17.8<br>(17.7-17.8) | 19.0<br>(18.9-19.0) | 20.0<br>(19.9-20.0) | 21.0<br>(20.9-21.0) | 22.2<br>(22.1-22.2) | 23.1<br>(23.0-23.1) | 23.7<br>(23.7-23.8) | 24.2<br>(24.1-24.4) |
| Singapore                 | 14.4<br>(13.5-15.4) | 14.4<br>(14.2-16.0) | 14.4<br>(14.4-16.2) | 15.6<br>(15.2-17.2) | 16.2<br>(16.5-18.8) | 16.7<br>(17.5-19.8) | 17.4<br>(18.8-21.0) | 18.2<br>(20.1-22.2) | 19.9<br>(21.7-23.6) | 21.7<br>(21.6-25.2) |
| South Korea               | 14.7<br>(12.2-18.0) | 14.4<br>(12.6-16.4) | 15.6<br>(14.8-16.5) | 16.2<br>(15.2-17.1) | 16.7<br>(15.8-17.6) | 17.4<br>(16.5-18.2) | 18.2<br>(17.5-19.0) | 19.0<br>(19.0-20.6) | 20.6<br>(20.4-21.9) | 21.7<br>(19.4-23.9) |
| Western Europe            | 15.8<br>(15.7-15.9) | 16.3<br>(16.2-16.4) | 17.1<br>(17.0-17.2) | 17.2<br>(17.6-17.8) | 18.5<br>(18.4-18.6) | 19.2<br>(19.0-19.3) | 19.9<br>(19.7-19.9) | 20.6<br>(20.5-20.7) | 21.3<br>(21.2-21.4) | 21.8<br>(21.6-22.0) |
| Andorra                   | 19.7<br>(17-122.5)  | 19.9<br>(17.9-22.7) | 20.4<br>(18.7-22.6) | 20.5<br>(18.9-22.7) | 20.8<br>(19.1-22.8) | 21.3<br>(19.4-23.0) | 22.5<br>(20.5-23.9) | 23.1<br>(21.5-24.4) | 23.1<br>(21.2-24.4) | 23.1<br>(20.9-24.5) |
| Austria                   | 15.0<br>(14.8-15.1) | 15.6<br>(15.5-15.8) | 16.2<br>(16.1-16.4) | 16.9<br>(16.8-17.1) | 17.9<br>(17.7-18.1) | 18.6<br>(18.5-18.8) | 19.5<br>(19.3-19.7) | 20.3<br>(20.1-20.5) | 21.0<br>(20.8-21.2) | 21.5<br>(21.0-21.9) |
| Belgium                   | 15.2<br>(15.0-15.5) | 15.8<br>(15.5-16.1) | 16.7<br>(16.4-17.0) | 17.4<br>(17.2-17.7) | 18.5<br>(18.2-18.7) | 19.1<br>(18.8-19.3) | 19.6<br>(19.3-19.9) | 20.3<br>(20.1-20.6) | 20.9<br>(20.6-21.2) | 20.9<br>(20.6-22.2) |
| Cyprus                    | 13.6<br>(13.3-13.9) | 13.3<br>(12.9-13.7) | 13.9<br>(13.5-14.2) | 14.9<br>(14.6-15.2) | 15.7<br>(15.3-16.0) | 16.7<br>(16.4-17.0) | 17.8<br>(17.4-18.1) | 18.7<br>(18.3-19.0) | 19.9<br>(19.5-20.3) | 20.2<br>(19.7-20.6) |
| Denmark                   | 16.6<br>(16.1-17.0) | 17.2<br>(16.7-17.8) | 17.6<br>(17.2-18.1) | 17.8<br>(17.3-18.3) | 18.0<br>(17.4-18.5) | 18.3<br>(17.3-18.3) | 18.3<br>(17.7-18.8) | 18.3<br>(18.4-19.5) | 18.3<br>(19.2-20.3) | 18.3<br>(19.8-21.8) |
| Finland                   | 14.5<br>(14.3-14.7) | 15.8<br>(15.5-16.0) | 16.9<br>(16.6-17.1) | 17.4<br>(17.2-17.6) | 17.7<br>(17.5-18.0) | 18.6<br>(18.4-18.9) | 19.4<br>(19.2-19.6) | 20.6<br>(20.4-20.8) | 21.2<br>(20.9-21.4) | 22.0<br>(21.4-22.6) |
| France                    | 16.8<br>(16.6-17.0) | 17.5<br>(17.3-17.6) | 18.4<br>(18.2-18.6) | 19.1<br>(18.9-19.3) | 20.1<br>(19.9-20.3) | 20.8<br>(20.6-21.0) | 21.3<br>(21.0-21.4) | 22.0<br>(21.8-22.2) | 22.8<br>(22.6-22.9) | 23.2<br>(22.8-23.7) |
| Germany                   | 14.9<br>(14.6-15.3) | 15.5<br>(15.1-15.8) | 16.3<br>(15.9-16.6) | 16.9<br>(16.6-17.3) | 17.7<br>(17.3-18.1) | 18.5<br>(18.1-18.8) | 19.3<br>(18.9-19.7) | 20.1<br>(19.7-20.4) | 20.6<br>(20.2-21.0) | 21.1<br>(20.5-21.8) |
| Greece                    | 16.6<br>(16.4-16.9) | 17.2<br>(16.9-17.4) | 19.1<br>(18.8-19.4) | 19.1<br>(17.6-18.1) | 18.0<br>(17.8-18.3) | 18.7<br>(18.5-19.0) | 19.3<br>(19.1-19.5) | 19.3<br>(19.8-20.3) | 20.7<br>(20.5-20.9) | 21.0<br>(20.4-21.5) |
| Iceland                   | 17.1<br>(16.7-17.5) | 18.1<br>(17.7-18.5) | 18.9<br>(18.5-19.4) | 19.0<br>(18.6-19.5) | 19.3<br>(18.7-19.5) | 19.3<br>(18.9-19.7) | 20.0<br>(19.6-20.4) | 20.0<br>(20.2-21.1) | 21.2<br>(20.8-21.6) | 21.2<br>(20.5-22.1) |
| Ireland                   | 15.1<br>(14.7-15.5) | 15.3<br>(14.9-15.7) | 15.8<br>(15.4-16.2) | 16.4<br>(15.9-16.9) | 16.9<br>(16.5-17.3) | 17.4<br>(16.9-17.8) | 18.0<br>(17.6-18.4) | 19.0<br>(19.1-19.9) | 20.5<br>(20.1-20.9) | 21.1<br>(20.0-22.1) |
| Israel                    | 14.5<br>(13.6-15.5) | 15.1<br>(14.3-16.0) | 15.7<br>(14.8-16.6) | 16.1<br>(15.3-16.9) | 16.1<br>(16.0-17.6) | 16.1<br>(16.9-18.4) | 17.6<br>(18.2-19.8) | 19.0<br>(19.0-20.6) | 21.5<br>(20.3-21.9) | 21.5<br>(20.0-23.0) |
| Italy                     | 16.0<br>(15.8-16.2) | 16.4<br>(16.2-16.6) | 17.2<br>(17.0-17.4) | 17.9<br>(17.8-18.1) | 18.9<br>(18.7-19.1) | 19.7<br>(19.5-19.9) | 20.5<br>(20.3-20.7) | 21.2<br>(21.1-21.4) | 21.7<br>(21.5-21.9) | 21.9<br>(21.4-22.5) |
| Luxembourg                | 15.9<br>(14.7-15.4) | 15.3<br>(15.0-15.7) | 16.3<br>(16.0-16.6) | 17.1<br>(16.7-17.4) | 17.8<br>(17.4-18.1) | 18.9<br>(18.5-19.2) | 19.9<br>(19.5-20.2) | 20.6<br>(20.2-20.9) | 21.3<br>(20.9-21.7) | 21.5<br>(20.6-22.5) |
| Malta                     | 13.1<br>(12.4-13.8) | 13.4<br>(12.8-14.1) | 13.8<br>(13.1-14.5) | 15.1<br>(14.4-15.8) | 16.6<br>(15.7-17.4) | 17.7<br>(16.9-18.5) | 18.0<br>(18.5-20.0) | 19.3<br>(17.2-18.7) | 20.4<br>(18.5-20.0) | 21.3<br>(19.6-21.1) |
| Netherlands               | 16.5<br>(16.2-16.9) | 17.3<br>(17.0-17.7) | 18.3<br>(18.0-18.7) | 18.7<br>(18.4-19.0) | 19.0<br>(18.6-19.3) | 19.0<br>(18.7-19.3) | 19.2<br>(18.9-19.5) | 20.0<br>(19.6-20.3) | 20.7<br>(20.4-21.1) | 21.4<br>(20.7-22.1) |
| Norway                    | 16.7<br>(16.4-17.0) | 17.3<br>(17.0-17.7) | 18.0<br>(17.7-18.4) | 18.5<br>(18.2-18.8) | 18.8<br>(18.5-19.2) | 19.2<br>(18.9-19.5) | 19.7<br>(19.4-20.0) | 20.5<br>(20.1-20.9) | 21.0<br>(20.6-21.3) | 21.6<br>(20.7-22.5) |
| Portugal                  | 14.9<br>(14.7-15.1) | 15.5<br>(15.3-15.8) | 16.3<br>(16.1-16.5) | 17.1<br>(16.9-17.3) | 17.6<br>(17.4-17.8) | 18.2<br>(18.0-18.5) | 19.0<br>(18.7-19.2) | 19.9<br>(19.7-20.2) | 20.9<br>(20.6-21.1) | 21.5<br>(21.0-21.5) |
| Spain                     | 16.0<br>(15.9-16.2) | 16.6<br>(16.5-16.8) | 17.8<br>(17.7-18.0) | 18.5<br>(18.3-18.6) | 19.3<br>(19.1-19.4) | 20.0<br>(19.9-20.2) | 20.7<br>(20.5-20.8) | 21.3<br>(21.2-21.5) | 22.3<br>(22.2-22.5) | 22.8<br>(22.5-23.2) |
| Sweden                    | 16.8<br>(16.3-17.3) | 17.4<br>(16.9-17.8) | 18.0<br>(17.7-18.2) | 18.6<br>(18.4-18.9) | 19.0<br>(18.8-19.3) | 19.7<br>(19.4-19.9) | 20.0<br>(19.7-20.2) | 20.4<br>(20.2-20.7) | 21.1<br>(20.8-21.3) | 21.4<br>(20.4-22.3) |
| Stockholm                 | 16.2<br>(14.6-18.1) | 17.1<br>(15.8-18.5) | 18.3<br>(17.8-18.9) | 19.0<br>(18.6-19.4) | 19.1<br>(18.7-19.5) | 19.7<br>(19.3-20.0) | 19.9<br>(19.5-20.3) | 20.5<br>(20.2-21.0) | 21.2<br>(20.7-21.6) | 21.6<br>(20.0-23.3) |
| Sweden except Stockholm   | 16.9<br>(16.4-17.4) | 17.4<br>(17.0-17.9) | 17.9<br>(17.6-18.2) | 18.5<br>(18.2-18.8) | 19.0<br>(18.7-19.3) | 19.7<br>(19.3-19.9) | 20.0<br>(19.7-20.3) | 20.4<br>(20.1-20.7) | 21.0<br>(20.7-21.3) | 21.3<br>(20.2-22.4) |
| Switzerland               | 16.2<br>(15.7-16.6) | 17.4<br>(16.9-17.9) | 18.1<br>(17.6-18.6) | 19.0<br>(18.6-19.5) | 19.6<br>(19.1-20.0) | 20.1<br>(19.6-20.5) | 20.7<br>(20.2-21.2) | 21.5<br>(21.0-21.9) | 21.9<br>(21.5-22.4) | 22.5<br>(20.5-24.4) |
| United Kingdom            | 16.0<br>(15.8-16.1) | 16.3<br>(16.2-16.4) | 16.8<br>(16.7-16.9) | 17.2<br>(17.1-17.3) | 17.8<br>(17.7-17.9) | 18.2<br>(18.1-18.3) | 18.9<br>(18.8-19.0) | 19.7<br>(19.6-19.8) | 20.6<br>(20.5-20.7) | 20.9<br>(20.7-21.0) |
| England                   | 16.1<br>(16.0-16.2) | 16.4<br>(16.3-16.5) | 16.9<br>(16.8-17.0) | 17.3<br>(17.3-17.4) | 17.9<br>(17.9-18.0) | 18.3<br>(18.3-18.4) | 19.0<br>(19.0-19.1) | 19.8<br>(19.7-19.9) | 20.7<br>(20.7-20.8) | 21.1<br>(20.9-21.2) |
| East Midlands             | 15.9<br>(15.4-16.4) | 16.3<br>(15.9-16.7) | 16.8<br>(16.5-17.1) | 17.3<br>(17.1-17.6) | 17.8<br>(17.6-18.1) | 18.3<br>(18.0-18.5) | 18.9<br>(18.7-19.2) | 19.7<br>(19.4-19.9) | 20.6<br>(20.4-20.8) | 20.8<br>(20.5-21.2) |
| East of England           | 16.4<br>(15.9-16.9) | 16.8<br>(16.4-17.2) | 17.3<br>(17.0-17.6) | 17.7<br>(17.5-17.9) | 18.3<br>(18.1-18.6) | 18.8<br>(18.6-19.1) | 19.4<br>(19.2-19.6) | 20.2<br>(20.0-20.5) | 21.1<br>(20.9-21.3) | 21.4<br>(21.0-21.7) |
| Greater London            | 16.7<br>(16.4-16.9) | 16.9<br>(16.6-17.1) | 17.4<br>(17.2-17.5) | 17.7<br>(17.6-17.9) | 18.3<br>(18.1-18.4) | 18.6<br>(18.4-18.7) | 19.2<br>(19.1-19.4) | 20.1<br>(19.9-20.2) | 21.2<br>(21.0-21.3) | 21.6<br>(21.4-21.8) |
| North East England        | 15.1<br>(14.6-15.5) | 15.5<br>(15.1-15.9) | 16.1<br>(15.8-16.3) | 16.2<br>(16.0-16.5) | 16.9<br>(16.7-17.1) | 17.1<br>(16.9-17.3) | 18.1<br>(17.9-18.3) | 18.7<br>(18.4-18.9) | 19.7<br>(19.5-19.9) | 20.4<br>(19.7-20.4) |
| North West England        | 15.3<br>(15.0-15.7) | 15.7<br>(15.4-16.0) | 16.2<br>(16.0-16.4) | 16.6<br>(16.4-16.7) | 17.1<br>(16.9-17.3) | 17.5<br>(17.3-17.7) | 18.3<br>(18.1-18.5) | 19.0<br>(18.9-19.2) | 19.9<br>(19.7-20.1) | 20.2<br>(20.0-20.5) |
| South East England        | 16.7<br>(16.3-17.1) | 17.0<br>(16.7-17.4) | 17.5<br>(17.3-17.8) | 18.0<br>(17.7-18.1) | 18.5<br>(18.3-18.7) | 18.9<br>(18.7-19.0) | 19.6<br>(19.4-19.7) | 20.4<br>(20.2-20.6) | 21.3<br>(21.1-21.5) | 21.6<br>(21.3-21.9) |
| South West England        | 16.7<br>(16.3-17.1) | 17.0<br>(16.7-17.4) | 17.5<br>(17.2-17.7) | 18.0<br>(17.8-18.2) | 18.5<br>(18.5-18.9) | 18.7<br>(18.7-19.0) | 19.7<br>(19.5-19.9) | 20.5<br>(20.3-20.7) | 21.4<br>(21.2-21.6) | 21.6<br>(21.3-21.9) |
| West Midlands             | 15.7<br>(15.3-16.2) | 16.0<br>(15.7-16.6) | 16.5<br>(16.3-16.9) | 17.0<br>(16.8-17.2) | 17.6<br>(17.4-17.8) | 18.2<br>(17.8-18.1) | 18.8<br>(18.6-19.0) | 19.4<br>(19.3-19.6) | 20.3<br>(20.1-20.4) | 20.6<br>(20.6-21.3) |
| Yorkshire and the Humber  | 15.3<br>(14.9-15.8) | 15.6<br>(15.1-16.1) | 16.2<br>(15.7-16.7) | 16.6<br>(15.9-17.2) | 17.4<br>(16.8-18.1) | 17.9<br>(17.3-18.7) | 18.6<br>(17.9-19.3) | 19.6<br>(18.9-20.1) | 20.3<br>(19.8-20.1) | 20.6<br>(19.5-21.8) |
| Northern Ireland          | 15.3<br>(14.9-15.7) | 15.6<br>(15.2-16.0) | 16.0<br>(15.6-16.5) | 16.3<br>(15.7-16.9) | 16.7<br>(16.1-17.4) | 17                  |                     |                     |                     |                     |

Appendix Table 14C. Estimates of life expectancy at age 65 by location, females, 1970, 1975, 1980, 1985, 1990, 1995, 2000, 2005, 2010, 2016

| Location                                         | 1970                | 1975                | 1980                | 1985                | 1990                | 1995                | 2000                | 2005                | 2010                | 2016                |
|--------------------------------------------------|---------------------|---------------------|---------------------|---------------------|---------------------|---------------------|---------------------|---------------------|---------------------|---------------------|
| Wales                                            | 15.8<br>(14.4-17.1) | 16.1<br>(14.9-17.3) | 16.7<br>(15.6-17.5) | 17.3<br>(16.6-17.9) | 17.7<br>(17.1-18.3) | 18.0<br>(17.4-18.5) | 18.6<br>(18.0-19.2) | 19.5<br>(18.9-20.1) | 20.1<br>(19.5-20.7) | 20.4<br>(19.4-21.0) |
| Southern Latin America                           | 16.0<br>(15.7-16.3) | 16.5<br>(16.1-16.9) | 16.9<br>(16.7-17.2) | 17.2<br>(17.0-17.5) | 17.7<br>(17.5-18.0) | 18.5<br>(18.2-18.7) | 18.9<br>(18.6-19.1) | 19.2<br>(19.0-19.5) | 19.6<br>(19.4-19.9) | 20.2<br>(19.5-20.9) |
| Argentina                                        | 15.9<br>(15.5-16.3) | 16.4<br>(15.8-17.0) | 16.9<br>(16.6-17.2) | 17.3<br>(17.0-17.6) | 17.8<br>(17.5-18.1) | 18.5<br>(18.1-18.8) | 18.7<br>(18.4-19.0) | 18.9<br>(18.7-19.3) | 19.2<br>(18.9-19.5) | 19.7<br>(19.1-20.4) |
| Chile                                            | 15.9<br>(15.4-16.4) | 16.7<br>(16.2-17.3) | 16.9<br>(16.4-17.5) | 17.1<br>(16.6-17.6) | 17.7<br>(17.2-18.3) | 18.5<br>(18.0-19.1) | 19.4<br>(19.0-19.9) | 20.1<br>(19.5-20.6) | 20.9<br>(20.4-21.4) | 21.6<br>(19.4-23.9) |
| Uruguay                                          | 16.4<br>(16.1-16.7) | 16.6<br>(16.4-16.9) | 16.9<br>(16.7-17.2) | 17.2<br>(17.0-17.5) | 17.7<br>(17.4-18.0) | 18.3<br>(18.1-18.6) | 19.0<br>(18.8-19.2) | 19.4<br>(19.1-19.6) | 19.9<br>(19.6-20.2) | 20.4<br>(19.9-21.0) |
| Central Europe, Eastern Europe, and Central Asia | 15.4<br>(15.1-15.7) | 15.6<br>(15.3-15.8) | 15.5<br>(15.2-15.8) | 15.4<br>(15.1-15.7) | 15.8<br>(15.5-16.1) | 15.1<br>(14.8-15.4) | 15.5<br>(15.3-15.8) | 15.9<br>(15.6-16.2) | 17.0<br>(16.7-17.3) | 17.8<br>(16.5-18.9) |
| Eastern Europe                                   | 15.9<br>(15.4-16.3) | 15.8<br>(15.3-16.2) | 15.6<br>(15.1-16.1) | 15.4<br>(14.9-15.9) | 15.8<br>(15.4-16.3) | 14.7<br>(14.3-15.2) | 15.1<br>(14.7-15.6) | 15.4<br>(14.9-15.9) | 16.6<br>(16.1-17.1) | 17.4<br>(15.5-19.3) |
| Belarus                                          | 17.3<br>(16.9-17.7) | 17.5<br>(17.2-17.9) | 17.1<br>(16.7-17.4) | 16.5<br>(16.2-16.9) | 16.5<br>(16.1-16.9) | 15.6<br>(15.2-16.0) | 15.7<br>(15.4-16.1) | 16.0<br>(15.7-16.4) | 16.8<br>(16.5-17.1) | 18.1<br>(16.7-19.7) |
| Estonia                                          | 15.6<br>(15.3-16.0) | 15.8<br>(15.5-16.1) | 15.7<br>(15.4-16.0) | 15.6<br>(15.3-15.9) | 16.1<br>(15.8-16.4) | 16.0<br>(15.6-16.3) | 16.9<br>(16.5-17.2) | 18.0<br>(17.7-18.4) | 19.6<br>(19.2-20.0) | 20.1<br>(19.4-21.4) |
| Latvia                                           | 15.8<br>(15.4-16.2) | 15.9<br>(15.5-16.4) | 15.8<br>(15.5-16.2) | 15.5<br>(15.2-15.9) | 15.9<br>(15.6-16.3) | 15.7<br>(15.3-16.1) | 16.9<br>(16.6-17.3) | 17.1<br>(16.7-17.5) | 18.2<br>(17.8-18.6) | 19.0<br>(18.0-20.1) |
| Lithuania                                        | 16.6<br>(16.3-16.9) | 17.0<br>(16.7-17.4) | 17.1<br>(16.8-17.3) | 16.7<br>(16.4-17.0) | 17.1<br>(16.8-17.4) | 16.6<br>(16.2-16.9) | 17.9<br>(17.6-18.1) | 18.0<br>(17.7-18.3) | 18.8<br>(18.5-19.1) | 19.6<br>(19.0-20.3) |
| Moldova                                          | 13.4<br>(11.7-15.2) | 13.9<br>(12.5-15.5) | 14.3<br>(13.3-15.3) | 13.8<br>(13.0-14.6) | 14.4<br>(13.8-15.1) | 13.0<br>(12.5-13.7) | 14.4<br>(13.8-15.1) | 14.5<br>(13.9-15.1) | 15.2<br>(14.5-15.9) | 16.3<br>(15.3-17.5) |
| Russia                                           | 15.7<br>(15.1-16.5) | 15.6<br>(14.9-16.3) | 15.5<br>(14.8-16.2) | 15.3<br>(14.6-15.9) | 15.8<br>(15.1-16.6) | 14.7<br>(14.0-15.4) | 15.0<br>(14.4-15.7) | 15.3<br>(14.6-16.1) | 16.6<br>(15.9-17.3) | 17.3<br>(14.5-20.1) |
| Ukraine                                          | 16.0<br>(15.5-16.4) | 15.9<br>(15.5-16.3) | 15.7<br>(15.3-16.1) | 15.4<br>(15.0-15.9) | 15.8<br>(15.4-16.2) | 14.6<br>(14.2-15.1) | 15.2<br>(14.8-15.6) | 15.3<br>(14.9-15.7) | 16.3<br>(15.9-16.7) | 17.2<br>(15.2-19.5) |
| Central Europe                                   | 14.8<br>(14.4-14.9) | 15.2<br>(15.0-15.3) | 15.2<br>(15.0-15.3) | 15.3<br>(15.2-15.5) | 15.7<br>(15.6-15.9) | 16.0<br>(15.8-16.1) | 16.6<br>(16.5-16.7) | 17.3<br>(17.2-17.5) | 18.1<br>(18.0-18.3) | 18.9<br>(18.6-19.2) |
| Albania                                          | 17.5<br>(16.8-18.3) | 17.9<br>(17.0-18.8) | 18.2<br>(17.5-19.1) | 18.3<br>(17.9-18.8) | 18.3<br>(18.1-18.5) | 18.6<br>(18.4-18.9) | 18.0<br>(17.7-18.2) | 17.6<br>(17.4-17.8) | 18.4<br>(17.9-18.9) | 19.6<br>(18.6-20.6) |
| Bosnia and Herzegovina                           | 14.5<br>(12.5-16.1) | 14.7<br>(13.5-16.4) | 14.9<br>(13.7-16.4) | 15.0<br>(13.9-16.3) | 15.5<br>(14.6-16.6) | 15.5<br>(14.6-16.6) | 17.0<br>(15.9-18.1) | 17.0<br>(16.3-18.3) | 17.8<br>(16.9-18.8) | 18.6<br>(17.2-19.9) |
| Bulgaria                                         | 14.7<br>(14.5-15.0) | 14.7<br>(14.4-14.9) | 14.9<br>(14.5-15.0) | 14.9<br>(14.6-15.1) | 15.2<br>(14.9-15.5) | 15.2<br>(15.1-15.6) | 15.2<br>(15.2-15.7) | 15.4<br>(15.9-16.4) | 16.1<br>(16.8-17.3) | 17.0<br>(16.2-18.9) |
| Croatia                                          | 14.1<br>(12.2-16.2) | 14.7<br>(12.7-16.8) | 15.2<br>(13.3-17.1) | 15.4<br>(14.6-16.2) | 16.0<br>(15.3-16.6) | 16.3<br>(15.7-16.9) | 16.3<br>(16.2-17.3) | 16.8<br>(16.8-17.9) | 17.4<br>(17.6-18.6) | 18.1<br>(17.5-19.7) |
| Czech Republic                                   | 14.3<br>(14.1-14.5) | 14.6<br>(14.4-14.8) | 14.6<br>(14.4-14.8) | 14.8<br>(14.6-14.9) | 15.3<br>(15.2-15.5) | 15.3<br>(16.0-16.4) | 17.1<br>(16.9-17.3) | 17.1<br>(17.7-18.0) | 18.7<br>(18.5-18.9) | 19.7<br>(19.2-20.1) |
| Hungary                                          | 14.4<br>(14.0-14.9) | 14.7<br>(14.4-15.1) | 14.7<br>(14.3-15.1) | 15.0<br>(14.6-15.4) | 15.4<br>(15.0-15.9) | 15.9<br>(15.5-16.3) | 16.6<br>(16.2-17.0) | 17.3<br>(16.9-17.8) | 18.3<br>(17.6-18.3) | 19.3<br>(17.5-19.2) |
| Macedonia                                        | 15.3<br>(14.8-15.8) | 15.2<br>(14.6-15.8) | 14.9<br>(14.4-15.4) | 14.8<br>(14.4-15.4) | 14.5<br>(14.0-15.1) | 14.3<br>(13.8-14.7) | 14.5<br>(14.1-14.9) | 14.8<br>(14.4-15.3) | 15.4<br>(15.0-15.9) | 16.3<br>(15.8-16.8) |
| Montenegro                                       | 17.1<br>(16.4-18.1) | 17.0<br>(16.0-18.3) | 17.6<br>(16.7-18.5) | 17.7<br>(16.4-18.3) | 18.0<br>(17.2-18.7) | 17.2<br>(16.5-17.8) | 17.2<br>(16.7-17.7) | 17.2<br>(17.2-18.1) | 18.3<br>(17.5-19.0) | 18.3<br>(17.6-19.7) |
| Poland                                           | 15.3<br>(15.0-15.6) | 15.2<br>(15.4-16.0) | 15.2<br>(15.5-16.0) | 15.3<br>(15.4-16.0) | 15.6<br>(15.8-16.4) | 16.2<br>(16.2-16.8) | 16.7<br>(17.1-17.7) | 17.4<br>(18.2-18.8) | 18.5<br>(19.0-19.6) | 20.1<br>(19.3-20.9) |
| Romania                                          | 14.5<br>(14.1-14.8) | 14.9<br>(14.5-15.3) | 14.7<br>(14.3-15.0) | 15.0<br>(14.6-15.3) | 15.4<br>(15.0-15.8) | 15.2<br>(14.8-15.6) | 16.1<br>(15.7-16.5) | 16.6<br>(16.3-17.0) | 17.4<br>(17.0-17.8) | 18.1<br>(17.3-18.9) |
| Serbia                                           | 15.3<br>(14.7-16.2) | 15.3<br>(15.3-17.0) | 16.2<br>(15.5-17.3) | 16.4<br>(15.7-17.3) | 16.1<br>(15.5-16.9) | 15.3<br>(14.9-15.9) | 15.2<br>(14.8-15.7) | 15.6<br>(15.2-16.1) | 16.6<br>(16.2-17.0) | 17.9<br>(17.5-18.2) |
| Slovakia                                         | 14.6<br>(14.3-15.0) | 15.2<br>(14.9-15.5) | 15.3<br>(15.0-15.6) | 15.3<br>(15.0-15.7) | 15.6<br>(15.3-16.0) | 16.2<br>(15.8-16.5) | 17.2<br>(16.3-17.0) | 17.2<br>(16.9-17.5) | 18.0<br>(17.6-18.3) | 18.8<br>(17.8-19.8) |
| Slovenia                                         | 14.4<br>(12.3-16.9) | 14.9<br>(13.2-16.9) | 15.4<br>(14.2-16.7) | 15.9<br>(15.2-16.5) | 17.0<br>(16.3-17.7) | 17.5<br>(16.9-18.2) | 18.5<br>(18.0-19.1) | 19.4<br>(18.7-20.1) | 20.4<br>(19.9-21.1) | 21.3<br>(20.3-22.4) |
| Central Asia                                     | 14.9<br>(14.0-15.9) | 15.4<br>(14.4-16.3) | 15.9<br>(15.4-16.4) | 16.0<br>(15.6-16.3) | 16.0<br>(15.5-16.1) | 14.8<br>(14.5-15.1) | 14.9<br>(14.7-15.2) | 15.9<br>(14.6-15.2) | 16.8<br>(15.4-15.9) | 16.8<br>(16.3-17.3) |
| Armenia                                          | 16.8<br>(15.4-18.7) | 17.2<br>(15.9-18.9) | 17.0<br>(16.5-18.3) | 17.0<br>(16.5-17.5) | 17.4<br>(15.9-16.8) | 16.6<br>(15.6-16.5) | 16.6<br>(16.1-17.1) | 16.6<br>(16.0-17.1) | 16.6<br>(15.9-17.1) | 16.6<br>(17.4-19.3) |
| Azerbaijan                                       | 15.4<br>(14.1-17.0) | 15.9<br>(14.7-17.3) | 16.2<br>(15.2-17.3) | 16.2<br>(15.3-16.6) | 16.3<br>(15.4-16.5) | 16.7<br>(14.5-15.6) | 17.0<br>(14.1-15.3) | 17.2<br>(13.9-15.5) | 18.1<br>(14.0-15.6) | 18.5<br>(15.7-18.6) |
| Georgia                                          | 16.4<br>(14.8-18.5) | 16.4<br>(15.1-19.0) | 17.1<br>(16.1-18.3) | 17.1<br>(15.8-17.2) | 17.2<br>(15.6-16.9) | 17.2<br>(16.1-17.3) | 17.0<br>(16.3-17.7) | 17.5<br>(16.7-17.7) | 18.1<br>(17.6-18.4) | 18.5<br>(17.1-20.3) |
| Kazakhstan                                       | 14.4<br>(11.9-17.4) | 14.8<br>(12.5-17.9) | 15.5<br>(14.1-17.1) | 15.9<br>(15.0-16.9) | 15.9<br>(15.1-16.8) | 14.8<br>(13.6-15.2) | 14.8<br>(13.9-15.6) | 14.7<br>(13.9-15.7) | 16.9<br>(14.9-16.3) | 16.9<br>(15.5-18.4) |
| Kyrgyzstan                                       | 14.9<br>(13.1-16.7) | 15.5<br>(13.8-17.3) | 16.3<br>(15.6-17.3) | 16.3<br>(15.6-16.3) | 15.8<br>(15.5-16.2) | 14.4<br>(14.1-14.7) | 15.2<br>(14.9-15.6) | 14.6<br>(14.2-14.9) | 16.6<br>(15.1-15.8) | 16.6<br>(15.8-17.4) |
| Mongolia                                         | 11.4<br>(10.6-12.4) | 13.1<br>(12.0-14.4) | 13.3<br>(12.4-14.9) | 13.8<br>(12.8-14.9) | 14.2<br>(13.3-15.2) | 13.0<br>(12.4-13.7) | 13.6<br>(12.4-13.6) | 13.6<br>(12.4-13.6) | 14.2<br>(13.5-15.0) | 15.6<br>(14.6-16.7) |
| Tajikistan                                       | 14.3<br>(13.7-15.1) | 14.7<br>(14.0-15.6) | 15.2<br>(14.6-16.1) | 16.0<br>(15.2-17.0) | 15.9<br>(15.1-16.7) | 15.1<br>(14.3-16.0) | 14.4<br>(13.5-15.3) | 14.1<br>(13.2-14.9) | 15.6<br>(14.6-16.5) | 16.9<br>(15.7-17.9) |
| Turkmenistan                                     | 14.4<br>(13.9-15.0) | 14.8<br>(14.3-15.3) | 15.2<br>(14.8-15.5) | 15.3<br>(15.1-15.6) | 15.1<br>(14.8-15.4) | 14.6<br>(14.3-14.8) | 15.0<br>(14.7-15.3) | 15.5<br>(15.2-15.8) | 16.2<br>(15.8-16.4) | 16.9<br>(16.3-17.5) |
| Uzbekistan                                       | 14.8<br>(13.5-15.8) | 15.2<br>(13.7-16.4) | 15.7<br>(14.8-16.6) | 16.0<br>(15.4-16.6) | 15.7<br>(15.2-16.2) | 14.3<br>(13.8-14.8) | 14.0<br>(13.6-14.5) | 13.9<br>(13.4-14.4) | 15.0<br>(14.7-15.5) | 15.8<br>(14.9-16.7) |
| Latin America and Caribbean                      | 15.1<br>(15.0-15.3) | 15.9<br>(15.8-16.1) | 16.5<br>(16.4-16.6) | 16.5<br>(16.4-16.6) | 17.1<br>(17.0-17.2) | 17.4<br>(17.3-17.5) | 18.2<br>(18.0-18.3) | 18.6<br>(18.5-18.7) | 18.9<br>(18.8-19.1) | 19.5<br>(19.3-19.7) |
| Central Latin America                            | 15.6<br>(15.4-15.8) | 16.2<br>(16.0-16.4) | 17.0<br>(16.8-17.1) | 17.1<br>(17.0-17.3) | 18.0<br>(18.1-18.1) | 18.2<br>(18.1-18.3) | 18.9<br>(18.8-19.1) | 19.1<br>(18.9-19.2) | 19.4<br>(19.2-19.5) | 19.8<br>(19.5-20.1) |
| Colombia                                         | 17.5<br>(17.2-17.7) | 16.6<br>(16.4-16.9) | 16.8<br>(16.5-17.2) | 16.8<br>(16.5-17.1) | 17.9<br>(17.6-18.1) | 18.0<br>(17.7-18.2) | 18.4<br>(18.1-18.6) | 18.6<br>(18.4-18.9) | 19.3<br>(19.0-19.5) | 20.2<br>(19.5-21.0) |
| Costa Rica                                       | 15.7<br>(15.4-16.1) | 16.6<br>(16.3-17.0) | 17.9<br>(17.5-18.2) | 18.4<br>(18.1-18.8) | 18.9<br>(18.5-19.2) | 19.3<br>(19.0-19.6) | 20.0<br>(19.7-20.3) | 21.0<br>(20.7-21.4) | 21.9<br>(21.6-22.3) | 22.3<br>(21.6-22.9) |
| El Salvador                                      | 15.4<br>(15.0-15.8) | 16.1<br>(15.7-16.5) | 17.2<br>(16.7-17.6) | 17.1<br>(16.7-17.6) | 17.5<br>(17.1-17.9) | 17.7<br>(17.3-18.0) | 18.6<br>(18.3-19.0) | 18.7<br>(18.3-19.0) | 19.4<br>(19.0-19.8) | 19.6<br>(18.6-20.5) |
| Guatemala                                        | 13.1<br>(12.0-14.3) | 14.5<br>(13.4-15.8) | 15.3<br>(14.1-16.5) | 14.9<br>(14.0-16.0) | 15.5<br>(14.5-16.4) | 16.4<br>(15.4-17.5) | 17.4<br>(16.2-18.7) | 17.9<br>(16.8-19.1) | 18.3<br>(17.0-19.6) | 18.8<br>(16.6-21.2) |
| Honduras                                         | 14.0<br>(13.0-15.2) | 15.1<br>(13.9-16.2) | 15.2<br>(14.1-16.2) | 13.7<br>(13.0-14.6) | 14.0<br>(13.3-14.8) | 14.4<br>(13.5-15.3) | 14.8<br>(13.4-16.3) | 15.1<br>(13.6-17.3) | 15.6<br>(13.9-18.3) | 16.0<br>(14.3-18.6) |
| Mexico                                           | 15.4<br>(15.1-15.8) | 16.3<br>(16.0-16.6) | 17.3<br>(17.1-17.5) | 17.6<br>(17.4-17.7) | 18.5<br>(18.3-18.6) | 18.7<br>(18.5-18.8) | 19.4<br>(19.3-19.6) | 19.3<br>(19.1-19.4) | 19.3<br>(19.2-19.5) | 19.5<br>(19.2-19.7) |
| Nicaragua                                        | 15.7<br>(15.1-16.3) | 18.3<br>(17.9-18.7) | 18.2<br>(17.4-19.1) | 19.0<br>(18.1-20.0) | 21.0<br>(20.6-21.3) | 20.3<br>(19.9-20.7) | 20.5<br>(20.2-20.9) | 20.5<br>(20.2-20.9) | 20.5<br>(20.1-20.8) | 21.0<br>(19.6-22.4) |
| Panama                                           | 16.2<br>(15.7-16.9) | 17.6<br>(17.0-18.1) | 18.7<br>(18.1-19.3) | 18.5<br>(17.9-19.1) | 18.9<br>(18.3-19.5) | 19.4<br>(18.8-20.0) | 20.3<br>(19.7-20.8) | 20.6<br>(20.0-21.2) | 21.1<br>(20.6-21.7) | 21.7<br>(20.6-22.8) |
| Venezuela                                        | 14.9<br>(14.4-15.4) | 15.1<br>(14.6-15.6) | 15.9<br>(15.4-16.4) | 16.7<br>(16.1-17.2) | 17.3<br>(16.8-17.9) | 17.8<br>(17.1-18.6) | 18.9<br>(18.3-19.4) | 19.5<br>(19.0-20.1) | 20.0<br>(19.4-20.6) | 20.2<br>(18.7-21.6) |
| Andean Latin America                             | 14.6<br>(14.0-15.3) | 16.0<br>(15.6-16.4) | 16.3<br>(15.9-16.7) | 16.5<br>(16.1-16.9) | 17.2<br>(16.8-17.7) | 17.4<br>(17.0-17.8) | 18.7<br>(18.3-19.0) | 19.5<br>(19.1-19.9) | 19.7<br>(19.1-20.1) | 20.2<br>(19.2-21.1) |
| Bolivia                                          | 12.9<br>(11.9-13.8) | 13.2<br>(12.2-14.0) | 13.4<br>(12.4-14.2) | 13.4<br>(12.4-14.4) | 13.4<br>(12.9-14.7) | 13.9<br>(13.6-15.4) | 14.5<br>(15.3-16.5) | 16.7<br>(15.7-17.3) | 16.7<br>(14.9-18.0) | 16.9<br>(15.0-18.6) |
| Ecuador                                          | 18.1<br>(17.7-18.5) | 17.4<br>(17.1-17.8) | 17.6<br>(17.2-18.0) | 17.9<br>(17.6-18.3) | 18.3<br>(17.9-18.6) | 18.7<br>(18.4-19.1) | 19.5<br>(19.1-19.8) | 20.4<br>(19.8-20.5) | 20.8<br>(20.0-20.7) | 20.8<br>(20.2-21.4) |
| Peru                                             | 13.7<br>(12.7-14.9) | 16.4<br>(15.8-17.1) | 16.8<br>(16.2-17.4) | 18.0<br>(16.5-17.6) | 18.2<br>(17.6-18.8) | 19.0<br>(17.3-18.5) | 19.4<br>(18.8-20.0) | 20.3<br>(19.6-21.1) | 20.5<br>(19.8-21.1) | 21.1<br>(19.4-22.8) |
| Caribbean                                        | 15.1<br>(14.7-15.6) | 15.6<br>(15.2-16.1) | 16.2<br>(15.8-16.6) | 16.4<br>(16.1-16.7) | 16.5<br>(16.3-16.8) | 16.8<br>(16.6-17.1) | 17.5<br>(17.2-17.8) | 17.9<br>(17.5-18.3) | 18.6<br>(16.2-18.1) | 18.6<br>(18.0-19.2) |
| Antigua and Barbuda                              | 13.0<br>(12.4-13.7) | 13.9<br>(13.2-14.5) | 15.0<br>(14.3-15.9) | 15.5<br>(14.6-16.4) |                     |                     |                     |                     |                     |                     |

Appendix Table 14C. Estimates of life expectancy at age 65 by location, females, 1970, 1975, 1980, 1985, 1990, 1995, 2000, 2005, 2010, 2016

| Location                               | 1970                | 1975                | 1980                | 1985                | 1990                | 1995                | 2000                | 2005                | 2010                | 2016                |
|----------------------------------------|---------------------|---------------------|---------------------|---------------------|---------------------|---------------------|---------------------|---------------------|---------------------|---------------------|
| Barbados                               | 15.3<br>(14.8-15.8) | 15.8<br>(15.4-16.4) | 16.7<br>(16.2-17.2) | 17.1<br>(16.6-17.6) | 17.2<br>(16.7-17.7) | 17.5<br>(16.9-18.1) | 18.7<br>(18.1-19.3) | 19.3<br>(18.7-19.8) | 19.9<br>(19.4-20.4) | 19.4<br>(18.6-20.2) |
| Belize                                 | 16.2<br>(15.7-17.0) | 16.6<br>(16.0-17.4) | 16.6<br>(15.7-17.7) | 17.0<br>(15.9-17.9) | 17.2<br>(16.3-18.1) | 17.2<br>(16.7-17.9) | 15.8<br>(15.4-16.2) | 16.0<br>(15.6-16.3) | 16.6<br>(16.1-17.2) | 16.6<br>(15.6-17.7) |
| Bermuda                                | 12.4<br>(11.9-13.0) | 13.3<br>(12.8-13.8) | 13.6<br>(13.0-14.2) | 14.1<br>(13.4-14.7) | 13.9<br>(13.3-14.6) | 14.4<br>(13.7-15.0) | 14.8<br>(14.3-15.4) | 16.5<br>(15.8-17.1) | 18.3<br>(17.6-19.1) | 20.4<br>(19.1-22.1) |
| Cuba                                   | 16.6<br>(16.3-16.8) | 17.4<br>(17.1-17.7) | 18.2<br>(17.8-18.5) | 18.4<br>(18.0-18.8) | 18.2<br>(17.8-18.5) | 18.3<br>(17.9-18.7) | 19.0<br>(18.6-19.4) | 19.4<br>(19.0-19.7) | 19.7<br>(19.4-20.1) | 20.2<br>(19.5-21.0) |
| Dominica                               | 13.6<br>(13.1-14.1) | 14.3<br>(13.8-14.8) | 15.6<br>(15.0-16.2) | 15.5<br>(14.9-16.1) | 14.9<br>(14.4-15.5) | 14.9<br>(14.4-15.5) | 16.2<br>(15.6-17.1) | 16.7<br>(15.9-17.3) | 16.9<br>(16.2-17.5) | 17.3<br>(16.0-18.2) |
| Dominican Republic                     | 16.4<br>(15.8-17.4) | 17.2<br>(16.4-18.2) | 17.6<br>(16.7-18.6) | 17.2<br>(16.4-18.3) | 17.4<br>(16.9-18.1) | 18.0<br>(17.4-18.8) | 19.0<br>(18.4-20.2) | 19.4<br>(18.4-20.7) | 19.6<br>(18.4-21.1) | 19.6<br>(18.5-21.2) |
| Grenada                                | 14.9<br>(13.8-16.2) | 15.9<br>(14.7-17.1) | 15.9<br>(14.8-17.3) | 15.4<br>(14.6-16.6) | 15.6<br>(15.0-16.2) | 16.0<br>(15.4-16.5) | 16.1<br>(15.5-16.8) | 16.0<br>(15.3-16.7) | 16.1<br>(15.4-16.8) | 16.3<br>(15.2-17.6) |
| Guyana                                 | 13.3<br>(12.8-14.1) | 13.5<br>(13.0-14.3) | 14.1<br>(13.5-14.8) | 14.8<br>(14.1-15.5) | 14.7<br>(14.2-15.3) | 15.0<br>(14.6-15.4) | 15.7<br>(15.1-16.2) | 14.4<br>(13.9-15.0) | 13.9<br>(13.4-14.5) | 15.2<br>(14.3-16.2) |
| Haiti                                  | 10.5<br>(9.3-12.7)  | 10.6<br>(9.4-12.5)  | 10.7<br>(9.6-12.0)  | 10.7<br>(9.9-11.6)  | 10.8<br>(10.2-11.4) | 11.3<br>(10.7-11.9) | 11.9<br>(11.1-12.6) | 12.2<br>(11.2-13.4) | 9.3<br>(7.4-12.2)   | 13.0<br>(11.7-14.5) |
| Jamaica                                | 16.0<br>(15.4-16.7) | 16.8<br>(16.0-17.6) | 16.8<br>(15.9-17.7) | 17.1<br>(16.4-17.8) | 17.8<br>(17.0-18.6) | 17.5<br>(16.4-18.8) | 17.7<br>(17.1-18.5) | 18.0<br>(17.4-18.8) | 17.9<br>(17.1-18.8) | 19.4<br>(16.5-19.4) |
| Puerto Rico                            | 17.6<br>(17.2-18.0) | 17.5<br>(17.1-17.9) | 18.4<br>(18.0-18.8) | 18.4<br>(18.0-18.8) | 18.9<br>(18.5-19.3) | 19.2<br>(18.8-19.6) | 20.0<br>(19.5-20.4) | 20.4<br>(20.0-20.8) | 20.9<br>(20.5-21.3) | 21.1<br>(20.3-22.0) |
| Saint Lucia                            | 14.8<br>(14.2-15.4) | 14.0<br>(13.7-14.3) | 14.6<br>(14.3-15.0) | 15.5<br>(15.2-15.9) | 17.1<br>(16.7-17.4) | 18.0<br>(17.7-18.4) | 18.7<br>(18.3-19.1) | 18.8<br>(18.3-19.2) | 20.0<br>(19.6-20.5) | 20.0<br>(19.5-20.6) |
| Saint Vincent and the Grenadines       | 15.6<br>(14.3-16.3) | 15.2<br>(14.4-16.2) | 15.3<br>(14.7-16.2) | 15.5<br>(15.0-16.1) | 15.7<br>(15.1-16.1) | 15.7<br>(15.3-16.1) | 15.8<br>(15.4-16.1) | 16.0<br>(15.6-16.4) | 16.2<br>(15.7-16.8) | 16.4<br>(15.7-17.3) |
| Suriname                               | 13.7<br>(13.1-14.6) | 14.1<br>(13.6-14.8) | 14.7<br>(14.4-15.1) | 16.0<br>(15.7-16.4) | 17.0<br>(16.6-17.4) | 16.9<br>(16.5-17.3) | 16.3<br>(15.8-16.7) | 16.2<br>(15.6-16.6) | 16.8<br>(16.2-17.2) | 17.1<br>(16.4-17.7) |
| Trinidad and Tobago                    | 13.2<br>(12.9-13.6) | 14.0<br>(13.6-14.4) | 14.9<br>(14.5-15.2) | 15.3<br>(14.9-15.7) | 15.4<br>(15.1-15.8) | 15.9<br>(15.5-16.2) | 16.3<br>(15.9-16.7) | 17.4<br>(17.1-17.8) | 18.4<br>(17.9-18.9) | 18.7<br>(18.1-19.4) |
| Virgin Islands, U.S.                   | 14.4<br>(13.4-15.0) | 15.2<br>(14.5-15.6) | 15.8<br>(15.4-16.2) | 16.5<br>(16.1-17.2) | 17.0<br>(16.6-18.1) | 17.2<br>(16.7-17.9) | 17.6<br>(17.2-18.3) | 17.9<br>(17.5-18.3) | 18.1<br>(17.7-18.6) | 18.5<br>(17.9-19.1) |
| Tropical Latin America                 | 14.9<br>(14.4-15.3) | 15.8<br>(15.5-16.1) | 15.9<br>(15.9-16.2) | 15.8<br>(15.7-16.0) | 16.4<br>(16.2-16.6) | 16.8<br>(16.6-17.0) | 17.4<br>(17.2-17.6) | 18.1<br>(18.0-18.3) | 18.8<br>(18.6-18.9) | 19.3<br>(19.0-19.6) |
| Brazil                                 | 14.9<br>(14.5-15.2) | 15.7<br>(15.5-16.1) | 15.7<br>(15.6-16.2) | 15.8<br>(15.6-16.0) | 16.4<br>(16.2-16.5) | 16.7<br>(16.6-16.9) | 17.4<br>(17.2-17.6) | 17.7<br>(18.0-18.3) | 18.1<br>(18.6-19.0) | 18.8<br>(19.1-19.6) |
| Paraguay                               | 16.9<br>(16.6-17.1) | 17.2<br>(17.0-17.5) | 17.9<br>(17.4-18.2) | 17.9<br>(17.5-18.3) | 18.5<br>(17.9-18.9) | 18.2<br>(17.4-18.6) | 18.3<br>(17.7-18.7) | 17.6<br>(17.1-18.5) | 17.9<br>(17.1-18.4) | 17.9<br>(17.0-18.9) |
| Southeast Asia, East Asia, and Oceania | 13.5<br>(13.3-13.7) | 13.9<br>(13.7-14.1) | 14.5<br>(13.7-14.1) | 14.4<br>(14.2-14.6) | 14.5<br>(14.4-14.7) | 14.8<br>(14.7-15.0) | 15.4<br>(15.2-15.5) | 16.2<br>(16.1-16.3) | 17.3<br>(17.1-17.4) | 18.5<br>(18.3-18.6) |
| East Asia                              | 13.7<br>(13.5-14.0) | 14.1<br>(13.9-14.4) | 14.0<br>(13.8-14.2) | 14.4<br>(14.2-14.7) | 14.5<br>(14.3-14.7) | 14.9<br>(14.7-15.1) | 15.5<br>(15.3-15.6) | 16.4<br>(16.3-16.6) | 17.6<br>(17.5-17.8) | 19.0<br>(18.8-19.2) |
| China                                  | 13.7<br>(13.5-14.0) | 14.1<br>(13.8-14.4) | 13.9<br>(13.7-14.2) | 14.4<br>(14.2-14.6) | 14.4<br>(14.2-14.7) | 14.8<br>(14.6-15.0) | 15.4<br>(15.3-15.6) | 16.4<br>(16.2-16.6) | 17.6<br>(17.5-17.8) | 19.0<br>(18.8-19.2) |
| North Korea                            | 15.1<br>(13.9-16.0) | 15.7<br>(14.6-16.7) | 15.6<br>(15.0-16.9) | 16.0<br>(15.2-17.2) | 16.2<br>(15.4-17.3) | 14.6<br>(13.4-16.1) | 14.2<br>(13.1-15.6) | 15.6<br>(14.9-16.5) | 16.6<br>(15.1-16.4) | 15.9<br>(15.4-16.5) |
| Taiwan (Province of China)             | 14.2<br>(13.8-14.5) | 15.0<br>(14.6-15.3) | 15.3<br>(15.0-15.7) | 15.8<br>(15.5-16.2) | 16.6<br>(16.3-17.0) | 17.4<br>(17.0-17.7) | 18.4<br>(18.1-18.8) | 19.5<br>(19.2-19.9) | 20.6<br>(20.2-21.0) | 21.0<br>(20.2-22.2) |
| Southeast Asia                         | 12.7<br>(12.4-13.1) | 13.1<br>(12.9-13.5) | 13.7<br>(13.5-14.1) | 14.3<br>(14.0-14.6) | 14.6<br>(14.3-14.9) | 14.9<br>(14.6-15.2) | 15.1<br>(14.9-15.4) | 15.6<br>(15.4-15.9) | 16.3<br>(16.1-16.5) | 17.1<br>(16.9-17.4) |
| Cambodia                               | 11.6<br>(10.8-12.4) | 9.9<br>(8.6-11.5)   | 11.7<br>(11.0-12.4) | 11.7<br>(11.1-12.3) | 12.2<br>(11.5-12.4) | 12.3<br>(11.8-12.6) | 12.6<br>(12.2-13.0) | 13.3<br>(13.1-13.6) | 14.2<br>(13.9-14.6) | 15.1<br>(14.6-15.6) |
| Indonesia                              | 11.6<br>(11.2-12.0) | 12.2<br>(11.8-12.5) | 12.9<br>(12.5-13.2) | 13.5<br>(13.1-13.8) | 13.7<br>(13.4-14.0) | 13.9<br>(13.6-14.2) | 14.1<br>(13.8-14.3) | 14.5<br>(14.2-14.7) | 15.0<br>(14.7-15.3) | 15.8<br>(15.5-16.1) |
| Laos                                   | 10.4<br>(10.1-10.8) | 10.7<br>(10.3-11.1) | 10.9<br>(10.6-11.3) | 11.4<br>(11.0-11.7) | 11.7<br>(11.4-12.2) | 12.1<br>(11.8-12.6) | 12.5<br>(12.3-13.2) | 12.7<br>(13.0-14.0) | 13.5<br>(13.7-14.8) | 15.2<br>(14.6-15.9) |
| Malaysia                               | 13.4<br>(13.2-13.7) | 14.1<br>(13.8-14.3) | 14.4<br>(14.1-14.8) | 14.8<br>(14.6-15.1) | 14.9<br>(14.7-15.1) | 15.0<br>(14.8-15.2) | 15.2<br>(15.0-15.4) | 15.3<br>(15.1-15.4) | 15.7<br>(15.4-15.9) | 16.9<br>(16.5-17.2) |
| Maldives                               | 11.8<br>(9.7-13.8)  | 11.6<br>(9.6-13.7)  | 11.6<br>(9.9-13.3)  | 12.0<br>(11.3-12.7) | 12.0<br>(12.4-13.7) | 13.8<br>(12.9-14.7) | 14.8<br>(14.1-15.6) | 14.8<br>(15.8-17.3) | 18.0<br>(17.2-18.8) | 19.4<br>(17.4-21.5) |
| Mauritius                              | 12.2<br>(11.8-12.5) | 12.8<br>(12.5-13.1) | 13.8<br>(13.5-14.2) | 14.2<br>(13.9-14.5) | 14.2<br>(14.7-15.4) | 15.1<br>(15.4-16.1) | 16.0<br>(15.7-16.4) | 16.0<br>(16.2-16.9) | 16.6<br>(17.2-17.9) | 17.6<br>(16.8-19.1) |
| Myanmar                                | 10.6<br>(10.2-11.2) | 11.2<br>(10.8-11.8) | 12.0<br>(11.2-12.1) | 12.0<br>(11.5-12.5) | 12.0<br>(11.8-12.7) | 12.9<br>(12.0-12.9) | 12.9<br>(12.5-13.3) | 13.6<br>(13.2-14.2) | 14.6<br>(14.1-15.2) | 15.8<br>(15.4-16.3) |
| Philippines                            | 16.8<br>(16.3-17.2) | 16.3<br>(15.9-16.7) | 16.3<br>(15.9-16.8) | 16.1<br>(15.7-16.5) | 16.1<br>(15.8-16.6) | 16.3<br>(15.6-16.4) | 16.6<br>(15.1-16.0) | 16.6<br>(14.9-15.7) | 16.6<br>(15.1-16.0) | 16.0<br>(14.9-17.1) |
| Sri Lanka                              | 13.7<br>(13.3-14.2) | 14.0<br>(13.5-14.4) | 14.0<br>(14.0-15.9) | 14.4<br>(14.0-16.7) | 14.4<br>(17.0-18.1) | 14.4<br>(17.0-18.1) | 14.4<br>(17.2-18.3) | 14.4<br>(17.6-19.0) | 14.4<br>(17.5-19.3) | 14.4<br>(17.9-21.7) |
| Seychelles                             | 15.0<br>(13.8-16.0) | 15.8<br>(14.7-16.5) | 16.3<br>(15.5-17.3) | 16.3<br>(15.2-15.9) | 16.1<br>(15.7-16.5) | 16.8<br>(15.7-16.5) | 16.8<br>(16.4-17.2) | 16.9<br>(16.5-17.5) | 17.6<br>(16.4-18.0) | 17.7<br>(16.5-18.5) |
| Thailand                               | 16.0<br>(15.6-16.4) | 16.8<br>(16.5-17.2) | 16.9<br>(16.5-17.2) | 16.7<br>(16.4-17.2) | 17.1<br>(16.7-17.4) | 17.4<br>(17.0-17.8) | 17.9<br>(17.5-18.4) | 18.4<br>(18.1-18.8) | 19.6<br>(19.2-20.0) | 20.3<br>(19.5-21.1) |
| Timor-Leste                            | 10.3<br>(9.0-12.2)  | 10.7<br>(9.3-12.6)  | 11.5<br>(10.0-13.8) | 12.1<br>(10.6-13.8) | 12.8<br>(11.4-14.3) | 13.4<br>(12.2-14.6) | 14.0<br>(12.9-15.1) | 14.7<br>(13.5-16.0) | 16.2<br>(14.6-17.3) | 16.5<br>(14.8-18.2) |
| Vietnam                                | 12.8<br>(11.8-14.4) | 13.2<br>(12.4-15.0) | 13.8<br>(13.0-15.4) | 14.6<br>(13.6-16.0) | 15.2<br>(14.2-16.5) | 15.7<br>(14.7-17.2) | 16.1<br>(15.3-17.8) | 16.5<br>(15.8-18.2) | 17.3<br>(16.4-18.4) | 18.1<br>(17.3-18.5) |
| Oceania                                | 11.1<br>(10.6-11.9) | 11.3<br>(10.7-12.0) | 11.4<br>(10.7-12.1) | 11.3<br>(10.7-12.0) | 11.3<br>(10.7-12.0) | 11.4<br>(10.8-12.0) | 11.4<br>(10.8-12.1) | 11.4<br>(10.7-12.1) | 11.5<br>(10.8-12.2) | 12.0<br>(11.2-12.8) |
| American Samoa                         | 14.2<br>(13.4-14.8) | 15.2<br>(14.5-15.9) | 15.5<br>(14.5-16.3) | 15.6<br>(14.8-16.4) | 16.4<br>(15.9-17.1) | 16.1<br>(15.1-16.8) | 16.1<br>(15.3-16.8) | 16.2<br>(15.1-16.9) | 16.3<br>(15.3-17.2) | 16.0<br>(14.6-17.5) |
| Federated States of Micronesia         | 12.0<br>(11.4-13.0) | 12.1<br>(11.2-13.0) | 12.4<br>(11.5-13.3) | 12.5<br>(11.7-13.4) | 12.6<br>(11.7-13.6) | 12.8<br>(11.8-13.8) | 13.0<br>(11.9-14.1) | 12.8<br>(11.4-14.1) | 12.7<br>(11.3-14.1) | 12.7<br>(11.4-14.2) |
| Fiji                                   | 13.4<br>(12.8-14.5) | 13.5<br>(12.8-14.3) | 13.7<br>(12.9-14.5) | 13.9<br>(13.0-14.9) | 13.4<br>(11.5-15.5) | 13.1<br>(11.7-14.7) | 12.9<br>(11.9-14.0) | 13.2<br>(12.2-14.2) | 13.2<br>(11.9-14.4) | 13.5<br>(11.5-15.7) |
| Guam                                   | 14.6<br>(14.0-15.2) | 15.1<br>(14.6-15.7) | 16.5<br>(16.0-17.1) | 17.3<br>(16.5-17.9) | 17.1<br>(16.6-17.9) | 17.1<br>(16.7-17.9) | 17.5<br>(16.9-18.1) | 17.4<br>(16.8-18.0) | 16.9<br>(16.3-17.5) | 17.1<br>(16.2-18.1) |
| Kiribati                               | 11.7<br>(10.6-13.2) | 12.2<br>(11.1-13.4) | 12.2<br>(11.3-13.2) | 11.8<br>(10.9-12.5) | 11.6<br>(11.1-12.2) | 11.8<br>(11.4-12.2) | 12.1<br>(11.6-12.6) | 12.4<br>(11.7-13.5) | 12.6<br>(11.7-13.5) | 12.8<br>(11.8-13.9) |
| Marshall Islands                       | 13.0<br>(11.6-14.8) | 13.5<br>(12.3-15.1) | 13.9<br>(13.0-15.3) | 14.0<br>(13.3-15.0) | 13.6<br>(13.1-14.1) | 13.1<br>(12.5-13.7) | 12.5<br>(11.8-13.2) | 12.1<br>(11.4-13.0) | 12.2<br>(11.2-13.3) | 12.7<br>(11.4-14.1) |
| Northern Mariana Islands               | 14.0<br>(12.4-15.7) | 14.7<br>(13.0-16.5) | 15.2<br>(13.5-16.9) | 15.5<br>(13.8-17.1) | 16.0<br>(14.5-17.6) | 17.0<br>(15.5-18.4) | 17.5<br>(16.1-18.8) | 17.6<br>(16.2-18.9) | 17.5<br>(16.1-18.9) | 17.4<br>(15.9-19.0) |
| Papua New Guinea                       | 10.5<br>(9.8-11.6)  | 10.6<br>(9.9-11.6)  | 10.6<br>(9.8-11.5)  | 10.4<br>(9.7-11.3)  | 10.4<br>(9.7-11.2)  | 10.5<br>(9.8-11.4)  | 10.6<br>(9.8-11.5)  | 10.5<br>(9.6-11.4)  | 10.7<br>(9.8-11.7)  | 11.3<br>(10.3-12.2) |
| Samoa                                  | 13.8<br>(13.3-14.6) | 13.9<br>(13.4-14.5) | 14.6<br>(14.0-15.3) | 14.9<br>(14.2-15.9) | 15.2<br>(14.3-16.2) | 15.4<br>(14.4-16.5) | 15.6<br>(14.5-16.7) | 15.8<br>(14.8-16.9) | 15.7<br>(14.8-16.8) | 15.9<br>(14.8-17.1) |
| Solomon Islands                        | 10.4<br>(9.6-11.4)  | 10.5<br>(9.7-11.4)  | 10.9<br>(10.0-11.9) | 11.0<br>(10.1-12.0) | 10.9<br>(10.1-11.9) | 11.1<br>(10.2-12.0) | 11.1<br>(10.3-12.0) | 10.9<br>(10.0-11.9) | 11.0<br>(10.0-12.1) | 11.5<br>(10.3-12.6) |
| Tonga                                  | 13.2<br>(12.3-14.3) | 13.4<br>(12.3-14.5) | 13.3<br>(12.3-14.5) | 13.7<br>(12.4-14.9) | 14.2<br>(13.0-15.5) | 14.5<br>(13.4-15.7) | 14.7<br>(13.7-15.8) | 15.2<br>(14.3-16.3) | 15.5<br>(14.4-16.6) | 15.7<br>(14.4-17.0) |
| Vanuatu                                | 11.0<br>(10.1-12.0) | 11.3<br>(10.5-12.2) | 11.6<br>(10.7-12.5) | 11.6<br>(10.8-12.6) | 11.7<br>(10.9-12.7) | 11.8<br>(10.9-12.7) | 11.8<br>(10.9-12.7) | 11.8<br>(10.7-12.8) | 12.0<br>(10.8-13.1) | 12.3<br>(11.0-13.4) |
| North Africa and Middle East           | 14.7<br>(14.3-15.0) | 15.1<br>(14.8-15.4) | 15.6<br>(15.3-15.8) | 15.6<br>(15.5-16.0) | 15.7<br>(15.9-16.3) | 16.0<br>(15.8-16.2) | 16.5<br>(16.3-16.7) | 16.5<br>(16.3-16.9) | 17.0<br>(16.7-17.4) | 17.7<br>(17.3-18.2) |
| North Africa and Middle East           | 9.9<br>(9.4-10.6)   | 9.8<br>(9.2-10.3)   | 9.6<br>(9.1-10.0)   | 9.6<br>(9.1-10.2)   | 9.7<br>(9.5-10.6)   | 9.7<br>(9.2-10.2)   | 9.7<br>(9.1-10.1)   | 9.8<br>(9.3-10.4)   | 10.2<br>(9.6-10.7)  | 10.7<br>(10.2-11.3) |
| Afghanistan                            | 14.6<br>(14.1-15.2) | 14.5<br>(13.7-15.0) | 14.5<br>(13.8-15.1) | 16.6<br>(16.1-17.2) | 16.9<br>(16.1-17.5) | 17.2<br>(16.4-17.9) | 17.7<br>(16.8-18.3) | 18.1<br>(17.1-18.6) | 18.5<br>(18.1-18.6) | 18.6<br>(18.1-19.0) |
| Algeria                                | 14.9<br>(13.2-16.3) | 14.7<br>(13.0-16.6) | 15.5<br>(14.0-17.0) | 14.6<br>(13.5-15.8) | 13.1<br>(12.0-14.2) | 12.7                |                     |                     |                     |                     |

Appendix Table 14C. Estimates of life expectancy at age 65 by location, females, 1970, 1975, 1980, 1985, 1990, 1995, 2000, 2005, 2010, 2016

| Location                    | 1970                | 1975                | 1980                | 1985                | 1990                | 1995                | 2000                | 2005                | 2010                | 2016                |
|-----------------------------|---------------------|---------------------|---------------------|---------------------|---------------------|---------------------|---------------------|---------------------|---------------------|---------------------|
| Egypt                       | 14.1<br>(13.8-14.5) | 14.9<br>(14.5-15.3) | 15.3<br>(14.9-15.8) | 14.4<br>(14.0-14.9) | 15.5<br>(15.1-15.9) | 15.8<br>(15.4-16.3) | 16.6<br>(16.1-17.1) | 16.2<br>(15.7-16.8) | 15.9<br>(15.3-16.4) | 16.7<br>(15.5-18.0) |
| Iran                        | 17.0<br>(15.6-18.5) | 17.7<br>(16.5-19.0) | 18.0<br>(16.9-19.2) | 18.1<br>(17.0-19.4) | 17.1<br>(16.2-18.3) | 17.2<br>(16.3-18.3) | 16.9<br>(15.9-17.8) | 16.2<br>(14.6-17.6) | 16.8<br>(15.2-18.5) | 18.1<br>(16.9-19.6) |
| Iraq                        | 14.8<br>(14.1-15.2) | 14.3<br>(13.2-15.2) | 14.1<br>(12.9-15.8) | 13.5<br>(12.7-15.3) | 13.7<br>(12.8-14.8) | 13.4<br>(12.7-14.0) | 13.6<br>(12.9-14.1) | 13.7<br>(12.8-14.5) | 14.2<br>(13.0-15.2) | 14.9<br>(13.4-16.4) |
| Jordan                      | 14.9<br>(13.7-15.8) | 15.4<br>(14.2-16.3) | 14.9<br>(13.5-16.4) | 14.8<br>(14.0-16.1) | 15.8<br>(14.7-17.3) | 16.1<br>(14.8-17.6) | 15.9<br>(14.5-17.5) | 15.2<br>(13.7-17.1) | 17.6<br>(15.8-19.4) | 18.4<br>(16.5-20.4) |
| Kuwait                      | 16.2<br>(15.3-17.2) | 16.0<br>(15.1-17.1) | 15.6<br>(14.7-16.8) | 15.6<br>(14.5-16.7) | 16.7<br>(15.4-18.2) | 16.2<br>(15.2-17.3) | 16.1<br>(15.1-17.2) | 16.1<br>(15.0-17.3) | 16.1<br>(15.0-17.1) | 17.3<br>(15.0-20.0) |
| Lebanon                     | 15.1<br>(13.1-16.9) | 15.0<br>(13.1-16.8) | 14.6<br>(13.1-16.5) | 15.5<br>(14.2-17.3) | 15.9<br>(14.8-17.4) | 16.3<br>(15.4-17.9) | 17.8<br>(16.5-18.5) | 18.5<br>(18.2-19.3) | 19.6<br>(18.7-20.4) | 20.1<br>(19.0-21.2) |
| Libya                       | 16.9<br>(16.1-17.9) | 17.3<br>(16.6-18.2) | 17.6<br>(16.9-18.5) | 17.6<br>(17.1-18.4) | 17.5<br>(16.6-18.0) | 17.5<br>(16.5-18.2) | 17.4<br>(16.2-18.2) | 17.7<br>(16.4-18.4) | 18.2<br>(17.2-18.5) | 18.1<br>(17.3-18.7) |
| Morocco                     | 14.0<br>(13.5-14.4) | 14.3<br>(13.8-14.6) | 14.6<br>(14.1-15.0) | 15.3<br>(14.7-15.7) | 15.5<br>(14.7-16.1) | 15.7<br>(14.8-16.3) | 16.3<br>(15.5-16.8) | 16.5<br>(15.6-17.3) | 17.0<br>(16.0-18.0) | 17.5<br>(16.6-18.4) |
| Palestine                   | 14.8<br>(12.7-16.1) | 15.3<br>(13.3-16.9) | 15.7<br>(14.1-17.1) | 15.3<br>(13.6-16.6) | 15.0<br>(13.7-16.3) | 14.6<br>(13.7-15.5) | 14.3<br>(14.0-14.6) | 14.8<br>(14.6-14.9) | 14.2<br>(14.0-14.4) | 13.6<br>(13.2-14.1) |
| Oman                        | 14.2<br>(13.7-14.9) | 14.8<br>(14.3-15.4) | 15.3<br>(14.9-15.9) | 16.1<br>(15.6-16.5) | 16.3<br>(15.4-17.1) | 16.2<br>(15.5-17.4) | 17.0<br>(16.5-17.9) | 18.0<br>(17.6-18.7) | 17.6<br>(16.8-18.4) | 19.0<br>(18.6-19.5) |
| Qatar                       | 16.4<br>(14.1-19.0) | 16.9<br>(14.5-19.5) | 17.0<br>(14.8-18.9) | 16.3<br>(15.0-18.0) | 16.6<br>(15.5-18.3) | 16.6<br>(15.6-18.2) | 17.2<br>(16.1-18.4) | 18.3<br>(17.4-19.1) | 19.6<br>(18.3-21.2) | 20.3<br>(18.4-22.9) |
| Saudi Arabia                | 17.7<br>(16.7-18.8) | 18.2<br>(16.9-19.2) | 17.9<br>(16.9-18.9) | 17.0<br>(16.1-17.8) | 16.0<br>(15.2-16.8) | 15.0<br>(14.3-15.7) | 13.6<br>(13.2-14.1) | 14.0<br>(13.7-14.4) | 14.8<br>(14.3-15.2) | 16.8<br>(16.1-17.5) |
| Sudan                       | 12.8<br>(12.3-13.2) | 12.7<br>(12.2-13.1) | 13.0<br>(12.5-13.5) | 12.5<br>(12.0-13.1) | 13.2<br>(12.6-13.7) | 13.2<br>(12.7-13.8) | 13.6<br>(13.1-14.2) | 14.3<br>(13.8-14.9) | 15.2<br>(14.6-15.7) | 15.9<br>(15.1-16.5) |
| Syria                       | 16.2<br>(15.6-16.8) | 16.6<br>(16.3-17.0) | 16.7<br>(16.4-17.0) | 16.4<br>(15.9-17.0) | 16.4<br>(16.1-16.7) | 16.0<br>(15.4-16.7) | 16.5<br>(16.2-16.7) | 17.2<br>(16.7-17.7) | 18.1<br>(17.7-18.6) | 18.1<br>(17.6-18.9) |
| Tunisia                     | 13.9<br>(13.4-14.4) | 14.6<br>(14.2-15.1) | 15.2<br>(14.6-15.9) | 16.6<br>(16.0-17.3) | 17.1<br>(16.5-17.8) | 17.3<br>(16.5-18.0) | 18.4<br>(17.8-19.2) | 18.7<br>(18.1-19.8) | 19.0<br>(18.3-20.5) | 19.4<br>(18.3-21.0) |
| Turkey                      | 16.2<br>(14.6-18.0) | 16.8<br>(15.7-18.1) | 17.7<br>(16.8-18.7) | 18.4<br>(17.6-19.3) | 18.6<br>(18.0-19.2) | 18.2<br>(17.7-18.7) | 19.3<br>(18.8-19.8) | 20.2<br>(19.6-20.9) | 20.7<br>(19.9-21.5) | 21.1<br>(19.6-22.6) |
| United Arab Emirates        | 15.8<br>(14.0-17.7) | 16.1<br>(14.0-17.7) | 16.2<br>(14.1-18.0) | 16.0<br>(14.5-18.0) | 15.9<br>(14.7-17.6) | 16.5<br>(15.3-17.7) | 18.3<br>(16.2-18.2) | 18.3<br>(17.6-18.7) | 18.3<br>(17.5-19.1) | 18.4<br>(17.1-19.4) |
| Yemen                       | 12.5<br>(11.3-12.6) | 12.7<br>(11.7-13.2) | 12.7<br>(12.0-13.5) | 12.7<br>(12.0-13.5) | 12.6<br>(11.9-13.5) | 12.6<br>(11.9-13.4) | 12.6<br>(12.3-13.6) | 12.6<br>(12.8-13.9) | 12.9<br>(13.4-14.5) | 14.1<br>(13.6-14.5) |
| South Asia                  | 10.9<br>(10.7-11.1) | 11.3<br>(11.1-11.6) | 11.8<br>(11.6-12.0) | 12.2<br>(12.0-12.4) | 12.7<br>(12.5-12.9) | 13.2<br>(13.0-13.4) | 13.7<br>(13.4-13.9) | 14.1<br>(13.9-14.4) | 14.6<br>(14.4-14.8) | 15.2<br>(14.9-15.5) |
| South Asia                  | 11.8<br>(10.7-11.1) | 12.5<br>(11.1-11.6) | 12.5<br>(11.6-12.0) | 12.5<br>(12.0-12.4) | 12.5<br>(12.5-12.9) | 13.8<br>(13.0-13.4) | 15.2<br>(13.4-13.9) | 15.2<br>(13.9-14.4) | 16.8<br>(14.4-14.8) | 17.6<br>(14.9-15.5) |
| Bangladesh                  | 12.2<br>(10.5-13.0) | 12.4<br>(11.4-13.7) | 12.5<br>(11.7-13.4) | 12.7<br>(11.9-13.2) | 13.2<br>(12.1-13.6) | 13.8<br>(13.2-14.5) | 15.3<br>(14.7-15.9) | 16.7<br>(15.4-16.5) | 17.8<br>(16.1-17.2) | 18.1<br>(16.6-18.3) |
| Bhutan                      | 10.5<br>(10.8-13.5) | 11.0<br>(11.0-13.7) | 11.5<br>(11.1-13.8) | 12.0<br>(11.5-14.0) | 12.6<br>(12.0-14.4) | 13.1<br>(12.7-14.9) | 13.5<br>(14.3-16.2) | 14.0<br>(15.8-17.6) | 14.5<br>(16.6-18.7) | 15.0<br>(16.9-19.0) |
| India                       | 12.3<br>(10.3-10.8) | 12.2<br>(10.8-11.2) | 12.2<br>(11.3-11.8) | 12.3<br>(11.8-12.2) | 12.4<br>(12.3-12.8) | 12.8<br>(12.9-14.4) | 13.7<br>(13.3-13.8) | 14.0<br>(13.8-14.3) | 14.4<br>(14.3-14.7) | 15.2<br>(14.8-15.3) |
| Nepal                       | 14.1<br>(11.6-12.9) | 14.3<br>(11.6-12.9) | 14.6<br>(11.6-12.9) | 14.6<br>(11.7-12.8) | 14.2<br>(11.9-12.9) | 13.3<br>(12.3-13.3) | 13.3<br>(13.2-14.3) | 13.5<br>(13.5-14.6) | 14.2<br>(14.0-14.9) | 14.8<br>(14.8-15.7) |
| Pakistan                    | 12.4<br>(12.9-14.9) | 12.4<br>(13.3-15.1) | 12.6<br>(13.8-15.2) | 12.7<br>(14.0-15.0) | 12.7<br>(13.7-14.7) | 12.7<br>(12.7-13.9) | 12.5<br>(12.7-14.0) | 13.0<br>(12.8-14.3) | 13.6<br>(13.2-15.4) | 14.4<br>(13.6-16.3) |
| Sub-Saharan Africa          | 14.8<br>(11.9-12.3) | 15.5<br>(12.2-12.6) | 15.8<br>(12.4-12.8) | 16.5<br>(12.5-12.9) | 17.3<br>(12.6-12.9) | 17.3<br>(12.5-12.9) | 14.5<br>(12.3-12.7) | 14.5<br>(12.7-13.2) | 14.6<br>(13.4-13.9) | 16.7<br>(14.1-14.7) |
| Southern Sub-Saharan Africa | 11.0<br>(14.2-15.5) | 11.8<br>(15.0-16.1) | 12.5<br>(15.3-16.3) | 13.3<br>(16.1-16.8) | 14.3<br>(16.9-17.8) | 14.3<br>(16.7-17.9) | 12.2<br>(14.0-15.0) | 12.7<br>(13.7-14.6) | 15.2<br>(14.2-15.2) | 15.8<br>(16.3-17.2) |
| Botswana                    | 11.7<br>(10.5-11.5) | 12.2<br>(11.4-12.4) | 12.8<br>(12.1-13.0) | 13.2<br>(12.9-13.7) | 13.5<br>(13.3-15.7) | 13.5<br>(10.5-20.2) | 11.8<br>(8.1-16.4)  | 10.9<br>(8.9-15.8)  | 11.2<br>(11.0-19.3) | 12.1<br>(12.7-23.0) |
| Lesotho                     | 12.0<br>(10.3-13.8) | 12.0<br>(10.6-14.2) | 12.5<br>(11.2-14.7) | 12.9<br>(12.0-14.9) | 13.2<br>(12.5-14.9) | 13.2<br>(12.4-15.8) | 13.5<br>(10.4-14.8) | 13.5<br>(9.6-12.7)  | 15.6<br>(9.8-13.1)  | 16.8<br>(10.1-15.7) |
| Namibia                     | 16.1<br>(11.3-13.0) | 16.7<br>(11.5-13.0) | 16.9<br>(11.9-13.2) | 17.6<br>(12.5-13.5) | 18.4<br>(12.8-13.8) | 18.4<br>(12.2-15.0) | 15.3<br>(10.6-16.4) | 15.3<br>(11.3-15.8) | 16.1<br>(13.4-18.5) | 17.6<br>(14.4-21.5) |
| South Africa                | 11.9<br>(15.2-17.0) | 12.4<br>(16.0-17.6) | 12.8<br>(16.3-17.6) | 12.8<br>(17.1-18.0) | 13.2<br>(18.0-18.8) | 14.3<br>(18.0-18.6) | 12.7<br>(15.1-15.5) | 12.6<br>(14.7-15.1) | 12.6<br>(15.0-15.4) | 14.7<br>(17.3-18.1) |
| Swaziland                   | 11.7<br>(10.7-12.8) | 12.2<br>(11.2-13.1) | 12.4<br>(11.7-13.2) | 13.2<br>(12.7-13.9) | 14.1<br>(13.1-16.5) | 14.4<br>(12.1-17.2) | 12.1<br>(9.9-14.3)  | 11.3<br>(9.6-13.5)  | 12.0<br>(10.4-15.9) | 13.2<br>(11.8-15.6) |
| Zimbabwe                    | 12.9<br>(12.4-13.2) | 13.1<br>(12.6-13.4) | 13.3<br>(12.9-13.6) | 13.4<br>(13.0-13.7) | 13.2<br>(12.9-13.7) | 13.2<br>(12.8-13.6) | 13.4<br>(13.4-14.4) | 13.8<br>(13.4-14.4) | 14.4<br>(14.0-15.0) | 15.0<br>(14.5-15.6) |
| Western Sub-Saharan Africa  | 12.9<br>(12.4-13.6) | 13.0<br>(12.4-13.6) | 13.0<br>(12.4-13.6) | 13.4<br>(12.8-13.9) | 13.8<br>(13.3-14.4) | 13.9<br>(13.2-14.4) | 14.0<br>(13.2-14.7) | 14.2<br>(13.3-15.0) | 14.2<br>(13.4-15.4) | 14.3<br>(14.3-15.4) |
| Benin                       | 12.2<br>(12.0-12.5) | 12.3<br>(12.1-12.6) | 12.4<br>(12.1-12.7) | 12.5<br>(12.2-12.8) | 12.4<br>(11.9-13.2) | 12.5<br>(11.8-13.6) | 12.7<br>(12.0-13.5) | 13.0<br>(12.4-13.5) | 13.1<br>(12.7-13.5) | 13.3<br>(12.9-13.8) |
| Burkina Faso                | 11.6<br>(10.7-12.7) | 11.8<br>(11.0-12.9) | 12.2<br>(11.4-13.1) | 12.9<br>(12.1-13.7) | 13.4<br>(12.6-14.3) | 13.2<br>(12.1-14.5) | 12.6<br>(11.4-14.1) | 12.9<br>(11.5-14.5) | 13.5<br>(12.0-15.2) | 14.0<br>(12.4-16.1) |
| Cameroon                    | 15.0<br>(13.9-16.5) | 15.4<br>(14.4-16.6) | 15.6<br>(14.8-16.4) | 16.2<br>(15.9-16.7) | 16.8<br>(16.4-17.5) | 17.1<br>(16.2-18.3) | 17.8<br>(16.5-19.4) | 18.4<br>(17.2-19.7) | 18.8<br>(18.3-19.8) | 18.8<br>(18.1-20.1) |
| Cape Verde                  | 13.5<br>(13.0-13.9) | 13.5<br>(12.9-13.9) | 13.4<br>(12.8-13.8) | 13.3<br>(12.7-13.7) | 13.1<br>(12.6-13.7) | 13.1<br>(12.5-13.7) | 13.0<br>(12.3-13.9) | 13.4<br>(12.5-14.4) | 13.7<br>(12.8-14.6) | 14.3<br>(13.2-15.2) |
| Chad                        | 12.6<br>(11.8-13.3) | 12.7<br>(11.9-13.4) | 12.8<br>(12.1-13.5) | 12.8<br>(12.2-13.5) | 12.5<br>(11.9-13.2) | 12.2<br>(11.4-13.1) | 12.0<br>(11.0-13.4) | 12.1<br>(11.2-13.5) | 12.6<br>(11.8-13.9) | 13.0<br>(12.2-14.0) |
| Cote d'Ivoire               | 13.0<br>(11.9-14.1) | 13.2<br>(12.1-14.4) | 13.4<br>(12.2-14.5) | 13.4<br>(12.3-14.5) | 13.5<br>(12.4-14.6) | 13.5<br>(12.6-14.6) | 13.8<br>(12.9-14.9) | 14.4<br>(13.3-15.7) | 14.6<br>(13.6-15.8) | 14.9<br>(14.0-16.3) |
| The Gambia                  | 12.6<br>(11.5-13.7) | 12.8<br>(11.8-14.0) | 12.9<br>(11.8-14.0) | 12.7<br>(11.8-13.8) | 12.7<br>(11.8-13.8) | 13.1<br>(12.1-14.3) | 13.2<br>(12.1-14.6) | 13.5<br>(12.4-14.9) | 13.5<br>(12.7-14.9) | 14.3<br>(13.6-15.7) |
| Ghana                       | 12.1<br>(11.0-13.1) | 12.1<br>(11.0-13.1) | 12.3<br>(11.3-13.1) | 12.2<br>(11.4-13.0) | 12.6<br>(11.8-13.2) | 12.6<br>(11.9-13.2) | 12.7<br>(11.9-13.4) | 12.8<br>(11.9-13.9) | 12.9<br>(11.9-14.1) | 13.0<br>(12.0-14.4) |
| Guinea                      | 11.1<br>(10.2-12.2) | 11.4<br>(10.5-12.7) | 11.4<br>(10.5-12.6) | 11.2<br>(10.4-12.4) | 11.2<br>(10.4-12.2) | 11.2<br>(10.5-12.1) | 11.3<br>(10.6-12.2) | 11.7<br>(10.8-13.0) | 11.9<br>(11.0-13.0) | 12.4<br>(11.6-13.3) |
| Guinea-Bissau               | 13.2<br>(12.6-13.6) | 13.3<br>(12.7-13.8) | 13.3<br>(12.7-13.8) | 13.2<br>(12.5-13.7) | 12.9<br>(12.2-13.6) | 12.5<br>(11.7-13.2) | 12.7<br>(11.8-13.7) | 12.8<br>(11.9-14.0) | 12.9<br>(12.3-13.9) | 13.4<br>(12.9-14.0) |
| Liberia                     | 10.7<br>(9.5-12.1)  | 10.7<br>(9.7-11.9)  | 11.1<br>(10.2-12.1) | 11.4<br>(10.7-12.3) | 11.4<br>(10.8-12.1) | 11.7<br>(11.1-12.5) | 12.3<br>(11.6-13.0) | 13.4<br>(12.5-14.2) | 14.1<br>(13.0-15.0) | 14.3<br>(12.7-15.7) |
| Mali                        | 11.9<br>(10.3-14.0) | 12.2<br>(10.5-14.0) | 12.4<br>(11.0-14.0) | 12.4<br>(11.5-13.6) | 12.4<br>(11.7-13.2) | 12.6<br>(12.0-13.5) | 13.2<br>(12.4-14.3) | 13.9<br>(12.9-15.2) | 14.6<br>(13.4-16.2) | 15.1<br>(13.8-17.1) |
| Mauritania                  | 12.8<br>(11.8-13.5) | 12.6<br>(11.8-13.3) | 12.4<br>(11.8-13.1) | 12.4<br>(11.7-13.1) | 13.1<br>(12.5-13.6) | 13.0<br>(12.4-13.5) | 13.4<br>(12.7-13.9) | 13.9<br>(13.0-14.4) | 14.1<br>(13.0-15.0) | 14.1<br>(12.6-15.5) |
| Niger                       | 13.5<br>(12.5-14.5) | 13.8<br>(12.9-14.6) | 14.2<br>(13.4-15.0) | 14.2<br>(13.5-15.0) | 13.9<br>(13.0-14.5) | 13.8<br>(12.9-14.6) | 14.1<br>(13.0-15.2) | 14.8<br>(13.8-16.3) | 16.0<br>(14.9-17.6) | 16.8<br>(15.6-18.6) |
| Nigeria                     | 14.5<br>(14.0-14.8) | 14.8<br>(14.3-15.3) | 15.2<br>(14.8-15.6) | 15.2<br>(14.7-15.6) | 14.7<br>(14.7-15.4) | 13.7<br>(12.8-14.9) | 13.2<br>(12.8-13.9) | 13.8<br>(13.4-14.3) | 14.5<br>(14.0-15.0) | 15.2<br>(14.5-16.2) |
| Sao Tome and Principe       | 12.8<br>(12.2-13.4) | 12.7<br>(12.1-13.3) | 12.8<br>(12.1-13.4) | 13.2<br>(12.6-13.8) | 13.2<br>(12.6-13.9) | 13.2<br>(12.5-13.9) | 13.1<br>(12.4-13.9) | 13.1<br>(12.7-14.0) | 13.3<br>(13.0-13.9) | 13.9<br>(13.3-14.3) |
| Senegal                     | 13.1<br>(12.4-13.7) | 13.3<br>(12.6-13.9) | 13.4<br>(12.7-13.9) | 13.5<br>(12.8-14.0) | 13.6<br>(13.1-14.1) | 13.6<br>(12.8-13.9) | 13.4<br>(12.8-13.9) | 12.8<br>(11.6-13.2) | 12.4<br>(11.5-13.4) | 12.9<br>(12.0-14.2) |
| Sierra Leone                | 13.1<br>(12.3-13.8) | 13.2<br>(12.3-14.0) | 13.3<br>(12.5-14.0) | 13.1<br>(12.3-13.9) | 13.0<br>(12.3-13.8) | 13.0<br>(12.4-14.2) | 13.2<br>(12.1-14.9) | 13.5<br>(12.2-15.1) | 13.7<br>(12.6-15.3) | 13.8<br>(13.1-15.1) |
| Togo                        | 10.7<br>(10.4-11.0) | 10.9<br>(10.6-11.3) | 11.1<br>(10.8-11.5) | 11.1<br>(10.9-11.4) | 11.1<br>(10.9-11.4) | 11.1<br>(10.8-11.3) | 11.3<br>(11.0-11.7) | 12.1<br>(11.8-12.6) | 13.0<br>(12.6-13.5) | 13.7<br>(13.2-14.2) |
| Eastern Sub-Saharan Africa  | 9.6<br>(9.0-10.3)   | 9.6<br>(9.0-10.3)   | 9.6<br>(8.9-10.3)   | 9.4<br>(8.6-10.2)   | 9.4<br>(8.7-10.4)   | 9.4<br>(8.8-10.2)   | 9.6<br>(9.0-10.4)   | 9.6<br>(10.0-11.5)  | 9.6<br>(10.9-12.6)  | 12.1<br>(11.2-13.0) |
| Burundi                     | 11.3<br>(10.4-12.6) | 11.7<br>(10.7-13.1) | 11.9<br>(10.9-13.3) | 12.0<br>(11.1-13.3) | 12.0<br>(11.4-13.5) | 12.0<br>(11.7-13.3) | 12.4                |                     |                     |                     |

Appendix Table 14C. Estimates of life expectancy at age 65 by location, females, 1970, 1975, 1980, 1985, 1990, 1995, 2000, 2005, 2010, 2016

| Location                         | 1970                | 1975                | 1980                | 1985                | 1990                | 1995                | 2000                | 2005                | 2010                | 2016                |
|----------------------------------|---------------------|---------------------|---------------------|---------------------|---------------------|---------------------|---------------------|---------------------|---------------------|---------------------|
| Djibouti                         | 14.7<br>(14.0-15.2) | 14.8<br>(14.2-15.4) | 14.8<br>(14.0-15.3) | 14.7<br>(14.0-15.3) | 14.9<br>(14.2-15.3) | 14.7<br>(14.0-15.3) | 14.7<br>(13.3-15.9) | 14.7<br>(12.9-16.4) | 14.9<br>(13.2-16.7) | 15.3<br>(13.9-17.5) |
| Eritrea                          | 9.5<br>(9.0-10.1)   | 9.7<br>(9.1-10.3)   | 9.9<br>(9.4-10.4)   | 10.0<br>(9.5-10.5)  | 10.3<br>(9.8-10.8)  | 11.1<br>(10.5-11.7) | 11.7<br>(11.0-12.4) | 12.0<br>(11.3-12.9) | 12.1<br>(11.4-13.0) | 12.5<br>(11.7-13.4) |
| Ethiopia                         | 9.0<br>(8.2-9.9)    | 9.0<br>(8.2-9.9)    | 9.1<br>(8.4-9.9)    | 9.2<br>(8.7-9.8)    | 9.5<br>(9.1-10.1)   | 9.8<br>(9.3-10.2)   | 10.2<br>(9.6-10.9)  | 11.2<br>(10.4-11.9) | 12.3<br>(11.4-13.3) | 13.3<br>(12.2-14.3) |
| Kenya                            | 12.5<br>(12.2-12.9) | 12.9<br>(12.6-13.3) | 13.3<br>(13.0-13.6) | 13.5<br>(13.1-13.8) | 13.4<br>(13.1-13.7) | 13.2<br>(12.7-13.6) | 13.3<br>(12.9-13.7) | 13.8<br>(13.4-14.2) | 14.6<br>(14.2-15.1) | 15.4<br>(14.9-15.8) |
| Madagascar                       | 9.9<br>(9.4-10.5)   | 10.9<br>(10.3-11.7) | 12.1<br>(11.2-13.1) | 11.9<br>(11.2-12.8) | 11.9<br>(11.3-12.6) | 12.0<br>(11.4-12.7) | 12.1<br>(11.5-12.8) | 12.4<br>(11.6-13.5) | 12.7<br>(11.7-14.5) | 13.1<br>(11.7-15.5) |
| Malawi                           | 11.9<br>(11.7-12.6) | 12.4<br>(11.7-13.0) | 12.8<br>(12.2-13.4) | 12.7<br>(11.9-13.3) | 12.1<br>(10.9-13.3) | 11.2<br>(9.9-13.5)  | 11.2<br>(9.5-14.0)  | 12.3<br>(10.1-14.6) | 13.4<br>(11.7-15.9) | 14.0<br>(12.4-16.4) |
| Mozambique                       | 11.9<br>(11.1-12.6) | 12.2<br>(11.4-12.9) | 12.3<br>(11.6-12.9) | 11.6<br>(11.0-12.2) | 12.7<br>(12.1-13.2) | 12.9<br>(12.1-14.0) | 13.3<br>(11.8-15.1) | 14.4<br>(12.4-16.0) | 14.8<br>(12.6-16.4) | 14.8<br>(13.2-16.5) |
| Rwanda                           | 10.5<br>(9.6-11.7)  | 10.7<br>(9.8-11.9)  | 10.8<br>(10.1-12.0) | 10.9<br>(10.2-11.7) | 10.2<br>(9.6-10.8)  | 9.9<br>(9.3-10.6)   | 11.1<br>(10.3-11.9) | 13.7<br>(12.4-14.9) | 14.7<br>(13.5-16.1) | 15.0<br>(13.9-16.4) |
| Somalia                          | 10.2<br>(9.5-10.9)  | 10.1<br>(9.4-10.8)  | 10.4<br>(9.7-11.0)  | 10.2<br>(9.5-10.8)  | 10.2<br>(9.5-10.9)  | 10.1<br>(9.5-10.8)  | 10.1<br>(9.5-10.8)  | 10.3<br>(9.6-11.0)  | 10.4<br>(9.7-11.2)  | 10.8<br>(10.1-11.5) |
| South Sudan                      | 12.7<br>(11.6-13.5) | 12.9<br>(11.8-13.7) | 13.0<br>(11.9-13.8) | 12.8<br>(11.7-13.7) | 12.5<br>(11.4-13.5) | 12.2<br>(11.0-13.5) | 12.2<br>(11.0-14.0) | 12.6<br>(11.3-14.5) | 12.9<br>(11.6-14.8) | 12.9<br>(11.6-14.7) |
| Tanzania                         | 12.7<br>(11.7-13.6) | 13.1<br>(12.1-13.9) | 13.5<br>(12.5-14.2) | 13.3<br>(12.5-14.1) | 12.5<br>(11.8-13.3) | 12.0<br>(11.2-13.4) | 12.2<br>(11.2-14.1) | 13.0<br>(11.8-15.0) | 13.6<br>(12.6-15.8) | 14.1<br>(13.3-16.0) |
| Uganda                           | 10.7<br>(10.3-11.4) | 10.9<br>(10.4-11.6) | 10.9<br>(10.4-11.5) | 11.1<br>(10.6-11.6) | 11.0<br>(10.4-11.6) | 11.0<br>(10.2-12.4) | 11.3<br>(10.5-12.2) | 11.9<br>(11.2-12.8) | 12.8<br>(12.1-14.2) | 13.6<br>(12.7-15.0) |
| Zambia                           | 13.0<br>(10.7-14.9) | 13.3<br>(11.3-14.9) | 13.4<br>(11.7-14.6) | 12.9<br>(11.7-14.2) | 11.6<br>(10.7-13.2) | 11.6<br>(9.1-11.0)  | 10.0<br>(8.7-10.7)  | 9.5<br>(9.1-12.0)   | 10.2<br>(10.0-13.3) | 11.6<br>(11.1-16.0) |
| Central Sub-Saharan Africa       | 11.4<br>(10.9-11.9) | 11.5<br>(11.1-12.0) | 11.5<br>(11.1-12.0) | 11.6<br>(11.2-12.1) | 11.7<br>(11.2-12.2) | 11.5<br>(11.1-12.0) | 11.4<br>(11.0-12.0) | 11.6<br>(11.2-12.1) | 12.0<br>(11.5-12.5) | 12.8<br>(12.3-13.2) |
| Angola                           | 11.8<br>(10.5-13.4) | 11.9<br>(10.6-13.5) | 11.8<br>(10.5-13.3) | 11.5<br>(10.4-13.1) | 11.1<br>(10.0-12.7) | 10.8<br>(9.6-12.4)  | 10.9<br>(9.8-12.5)  | 11.4<br>(10.2-13.2) | 12.3<br>(10.8-14.3) | 13.3<br>(11.7-15.1) |
| Central African Republic         | 10.4<br>(9.4-11.9)  | 10.6<br>(9.6-11.9)  | 10.8<br>(10.0-11.9) | 11.0<br>(10.3-11.8) | 10.3<br>(9.7-11.1)  | 10.1<br>(9.2-11.3)  | 10.0<br>(8.8-11.6)  | 10.1<br>(8.8-12.1)  | 10.5<br>(9.0-12.6)  | 10.7<br>(9.3-12.6)  |
| Congo                            | 9.4<br>(8.4-10.7)   | 9.6<br>(8.6-10.9)   | 9.8<br>(8.9-11.1)   | 10.2<br>(9.4-11.3)  | 10.2<br>(9.5-11.1)  | 10.1<br>(9.4-10.9)  | 10.2<br>(9.5-11.1)  | 10.9<br>(10.1-12.0) | 11.6<br>(10.6-12.8) | 12.4<br>(11.0-13.9) |
| Democratic Republic of the Congo | 11.6<br>(11.0-12.3) | 11.8<br>(11.1-12.4) | 11.7<br>(11.2-12.3) | 11.9<br>(11.3-12.5) | 12.1<br>(11.6-12.8) | 11.9<br>(11.4-12.6) | 11.8<br>(11.3-12.5) | 11.8<br>(11.4-12.5) | 12.0<br>(11.5-12.5) | 12.0<br>(12.3-13.3) |
| Equatorial Guinea                | 9.6<br>(8.8-10.7)   | 9.8<br>(9.0-10.9)   | 10.2<br>(9.2-11.3)  | 10.3<br>(9.4-11.6)  | 10.3<br>(9.1-11.1)  | 10.0<br>(9.2-11.4)  | 10.1<br>(10.5-14.3) | 12.0<br>(11.2-16.8) | 13.8<br>(12.0-17.5) | 14.7<br>(13.1-19.3) |
| Gabon                            | 11.8<br>(10.4-13.7) | 12.4<br>(11.0-14.3) | 12.9<br>(11.7-14.6) | 13.0<br>(12.0-14.4) | 12.6<br>(11.8-13.4) | 12.6<br>(11.9-13.2) | 11.9<br>(11.2-12.7) | 12.1<br>(11.3-13.0) | 13.2<br>(12.2-14.1) | 14.2<br>(13.1-16.0) |

| Appendix Table 15A. Live births (in thousands) by location, both sexes combined, 1970, 1975, 1980, 1985, 1990, 1995, 2000, 2005, 2010, 2016 |           |          |           |          |           |           |           |           |           |           |
|---------------------------------------------------------------------------------------------------------------------------------------------|-----------|----------|-----------|----------|-----------|-----------|-----------|-----------|-----------|-----------|
| Country                                                                                                                                     | 1970      | 1975     | 1980      | 1985     | 1990      | 1995      | 2000      | 2005      | 2010      | 2016      |
| Global                                                                                                                                      | 114039.51 | 115081.9 | 120506.14 | 127067.7 | 129806.24 | 126351.26 | 125778.47 | 128505.97 | 133282.62 | 128802.94 |
| High-income                                                                                                                                 | 13780.08  | 12281.32 | 12441.32  | 11975.02 | 12378.57  | 11737.64  | 11773.67  | 11841.6   | 11847     | 11600.27  |
| High-income North America                                                                                                                   | 3962.54   | 3447.42  | 3969      | 4128.02  | 4548.69   | 4303.96   | 4377.95   | 4536.46   | 4332.73   | 4449.56   |
| Canada                                                                                                                                      | 357.5     | 352.09   | 367.84    | 376.35   | 404.47    | 368.6     | 330.65    | 346.27    | 373.65    | 402.71    |
| Greenland                                                                                                                                   | 1.52      | 1.01     | 1.02      | 1.04     | 1.14      | 1         | 0.85      | 0.75      | 0.71      | 0.7       |
| United States                                                                                                                               | 3603.52   | 3094.32  | 3600.14   | 3750.63  | 4143.08   | 3934.35   | 4046.45   | 4189.43   | 3958.37   | 4046.15   |
| Australasia                                                                                                                                 | 327.83    | 282.05   | 278.37    | 294.89   | 317.63    | 310.45    | 302.59    | 317.39    | 355.61    | 357.55    |
| Australia                                                                                                                                   | 265.1     | 227.19   | 228.03    | 242.9    | 258.57    | 253.22    | 246.05    | 258.93    | 293.71    | 300.49    |
| New Zealand                                                                                                                                 | 62.73     | 54.86    | 50.33     | 52       | 59.06     | 57.22     | 56.53     | 58.46     | 61.9      | 57.06     |
| High-income Asia Pacific                                                                                                                    | 2979.97   | 2734.04  | 2484.77   | 2119.33  | 1968.69   | 1909.55   | 1782.38   | 1558.5    | 1579.16   | 1376.12   |
| Brunei                                                                                                                                      | 3.67      | 4.53     | 5.78      | 6.25     | 7.09      | 7.68      | 8.07      | 7.15      | 6.68      | 6.54      |
| Japan                                                                                                                                       | 1977.67   | 1832.96  | 1568.23   | 1430.34  | 1227.86   | 1189.95   | 1175.52   | 1087.81   | 1075.52   | 935.88    |
| Singapore                                                                                                                                   | 45.73     | 39.48    | 41.05     | 42.21    | 48.12     | 47.87     | 42.8      | 36.26     | 35.2      | 34.33     |
| South Korea                                                                                                                                 | 952.89    | 857.07   | 869.72    | 640.54   | 685.62    | 664.05    | 555.99    | 427.29    | 461.76    | 399.37    |
| Western Europe                                                                                                                              | 5722.38   | 4947.99  | 4795.29   | 4518.3   | 4584.61   | 4298.19   | 4317.64   | 4436.58   | 4553.01   | 4402.44   |
| Andorra                                                                                                                                     | 0.16      | 0.22     | 0.28      | 0.4      | 0.5       | 0.6       | 0.6       | 0.61      | 0.64      | 0.6       |
| Austria                                                                                                                                     | 110.06    | 90.4     | 91.54     | 86.13    | 91.51     | 88.81     | 77.41     | 78.63     | 78.42     | 82.43     |
| Belgium                                                                                                                                     | 140.56    | 117.41   | 122.63    | 115.33   | 124.3     | 115.99    | 116.46    | 121.38    | 127.58    | 129.84    |
| Cyprus                                                                                                                                      | 13.53     | 10.64    | 12.2      | 12.1     | 12        | 10.12     | 8.26      | 8.48      | 9.77      | 10.41     |
| Denmark                                                                                                                                     | 72.07     | 68.57    | 55.54     | 54.38    | 63.53     | 68.41     | 66.64     | 65.15     | 61.77     | 59.73     |
| Finland                                                                                                                                     | 61.81     | 66.09    | 63.34     | 61.67    | 65.77     | 62.31     | 56.75     | 58.41     | 60.42     | 59.55     |
| France                                                                                                                                      | 854.71    | 721.92   | 799.99    | 771.26   | 760.41    | 731.46    | 774.61    | 788.62    | 798.46    | 792.44    |
| Germany                                                                                                                                     | 1025.41   | 791.67   | 849.35    | 822.7    | 854       | 780.24    | 751.65    | 684.55    | 663.47    | 697.37    |
| Greece                                                                                                                                      | 141.61    | 142.06   | 142.13    | 112.79   | 102.73    | 103.79    | 102.9     | 110.58    | 112.68    | 90.9      |
| Iceland                                                                                                                                     | 4.08      | 4.29     | 4.4       | 3.79     | 4.62      | 4.31      | 4.18      | 4.32      | 4.71      | 4.25      |
| Ireland                                                                                                                                     | 66.14     | 66.67    | 72.76     | 61.87    | 53.54     | 49.61     | 55.85     | 62.7      | 75.69     | 63.39     |
| Israel                                                                                                                                      | 76.01     | 88.43    | 101.43    | 105.1    | 114.71    | 114.71    | 132.65    | 146.61    | 163.42    | 171.7     |
| Italy                                                                                                                                       | 910.74    | 820.58   | 639.69    | 574.33   | 571.73    | 525.58    | 538.17    | 554.98    | 550.1     | 491.62    |
| Luxembourg                                                                                                                                  | 4.35      | 3.88     | 4.26      | 4.16     | 4.93      | 5.5       | 5.59      | 5.42      | 5.69      | 6.51      |
| Malta                                                                                                                                       | 5.46      | 5.98     | 5.71      | 5.7      | 5.83      | 5         | 4.02      | 3.63      | 3.9       | 3.77      |
| Netherlands                                                                                                                                 | 229.52    | 174.83   | 179.77    | 180.65   | 197.4     | 188.86    | 204.61    | 188.65    | 183.54    | 177.48    |
| Norway                                                                                                                                      | 63.25     | 53.82    | 50.56     | 51.57    | 60.78     | 60.59     | 58.14     | 57.71     | 60.51     | 62.21     |
| Portugal                                                                                                                                    | 181.36    | 177.97   | 153.35    | 128.29   | 116.43    | 108.3     | 115.38    | 106.37    | 99.64     | 81.77     |
| Spain                                                                                                                                       | 666.23    | 672.96   | 546.2     | 442.92   | 393.73    | 361.68    | 401.78    | 468.98    | 481.88    | 421.35    |
| Sweden                                                                                                                                      | 110.96    | 100.72   | 96.14     | 100.41   | 123.84    | 99.06     | 91.17     | 104.21    | 115.34    | 118.31    |
| Switzerland                                                                                                                                 | 96.92     | 76.7     | 73.64     | 74.99    | 83.56     | 82        | 75.55     | 73.57     | 80.23     | 85.55     |
| United Kingdom                                                                                                                              | 887.44    | 692.16   | 730.4     | 747.79   | 790.33    | 731.25    | 675.27    | 743.03    | 815.12    | 791.29    |
| England                                                                                                                                     | 722.52    | 562.55   | 596.27    | 618.44   | 662.65    | 613.67    | 569.19    | 631.27    | 694.37    | 675.59    |
| East Midlands                                                                                                                               | 56.91     | 46.07    | 49.02     | 48.86    | 53.21     | 49.43     | 45.56     | 50.76     | 55.46     | 54.52     |
| East of England                                                                                                                             | 67.39     | 54.81    | 59.95     | 63.11    | 67.5      | 63.38     | 59.37     | 66.82     | 73.29     | 73.34     |
| Greater London                                                                                                                              | 115.14    | 89.8     | 94.09     | 101.3    | 112.41    | 106.57    | 105.74    | 118.52    | 137.03    | 132.86    |
| North East England                                                                                                                          | 43.96     | 32.51    | 33.84     | 33.58    | 34.18     | 30.77     | 26.93     | 28.59     | 30.1      | 29.1      |
| North West England                                                                                                                          | 118.18    | 87.49    | 91.05     | 92.51    | 96.71     | 85.09     | 76.62     | 83.73     | 90.41     | 85.39     |
| South East England                                                                                                                          | 98.87     | 80.42    | 87.79     | 93.41    | 100.63    | 94.12     | 86.91     | 96.76     | 107.8     | 103.19    |
| South West England                                                                                                                          | 56.9      | 46.54    | 50.25     | 52.63    | 56.9      | 54.53     | 49.26     | 54.79     | 60.99     | 60.06     |
| West Midlands                                                                                                                               | 87.76     | 65.9     | 68.07     | 69.59    | 73.57     | 67.18     | 61.96     | 68.3      | 73.66     | 71.72     |
| Yorkshire and the Humber                                                                                                                    | 77.41     | 59.01    | 62.22     | 63.46    | 67.54     | 62.6      | 56.83     | 62.99     | 65.42     | 65.42     |
| Northern Ireland                                                                                                                            | 30.42     | 28.22    | 29.13     | 28.38    | 26.11     | 23.99     | 21.83     | 22.92     | 25.48     | 23.06     |
| Scotland                                                                                                                                    | 87.66     | 65.89    | 68.66     | 65.39    | 65.61     | 59.61     | 52.88     | 55.23     | 58.94     | 58.68     |
| Wales                                                                                                                                       | 46.84     | 35.5     | 36.33     | 35.58    | 35.96     | 33.98     | 31.37     | 33.61     | 36.33     | 33.96     |
| Southern Latin America                                                                                                                      | 787.36    | 869.82   | 913.89    | 914.47   | 958.95    | 915.49    | 993.11    | 992.67    | 1026.49   | 1014.59   |
| Argentina                                                                                                                                   | 484.92    | 582.78   | 628.57    | 614.89   | 620.52    | 585.33    | 687.64    | 707.46    | 734.22    | 725.79    |
| Chile                                                                                                                                       | 245.61    | 233.27   | 238.62    | 251.82   | 287.74    | 273.49    | 251.75    | 236.97    | 245.31    | 240.37    |
| Uruguay                                                                                                                                     | 56.83     | 53.77    | 46.7      | 47.76    | 50.69     | 56.67     | 53.72     | 48.24     | 46.97     | 48.44     |
| Central Europe, Eastern Europe, and Central Asia                                                                                            | 6306.91   | 6806.27  | 7002.7    | 7473.03  | 6529.09   | 5007.27   | 4493.59   | 4872.19   | 5570.89   | 5652.53   |
| Eastern Europe                                                                                                                              | 2988.41   | 3182.98  | 3281.42   | 3575.94  | 2891.75   | 2054.53   | 1872.11   | 2104.02   | 2514.56   | 2587.45   |
| Belarus                                                                                                                                     | 147.96    | 147.43   | 156.14    | 167.91   | 141.29    | 102.43    | 93.24     | 95.39     | 110.68    | 115.39    |
| Estonia                                                                                                                                     | 21.77     | 21.4     | 22.36     | 23.81    | 21.02     | 13.52     | 12.99     | 14.6      | 15.05     | 13.68     |
| Latvia                                                                                                                                      | 34.71     | 34.34    | 35.69     | 41.29    | 36.57     | 20.98     | 19.85     | 21.89     | 19.58     | 22.38     |
| Lithuania                                                                                                                                   | 56.02     | 51.9     | 50.92     | 58.56    | 56.46     | 39.87     | 33.23     | 29.63     | 31.71     | 29.41     |
| Moldova                                                                                                                                     | 75.71     | 82.05    | 86.36     | 92.74    | 77.91     | 55.75     | 42.62     | 45.76     | 44.86     | 44.86     |
| Russia                                                                                                                                      | 1922.91   | 2105.3   | 2181.54   | 2413.72  | 1910.51   | 1337      | 1283.43   | 1455.31   | 1785.1    | 1882.26   |
| Ukraine                                                                                                                                     | 729.33    | 740.55   | 748.42    | 777.9    | 648       | 484.98    | 386.75    | 441.51    | 506.67    | 479.47    |
| Central Europe                                                                                                                              | 1907.61   | 2140.61  | 2053.27   | 1956.61  | 1675.57   | 1330.35   | 1175.25   | 1161.77   | 1164.39   | 1090.27   |
| Albania                                                                                                                                     | 57.13     | 62.83    | 71.28     | 80.63    | 85.27     | 68.79     | 50.51     | 38.37     | 34.84     | 39.46     |
| Bosnia and Herzegovina                                                                                                                      | 84.01     | 76.67    | 72.46     | 79.33    | 71.59     | 50.28     | 33.51     | 33.09     | 34.59     | 31.58     |
| Bulgaria                                                                                                                                    | 135.94    | 144.86   | 126.51    | 121.47   | 101.36    | 71.55     | 71.19     | 70.56     | 71.96     | 64.04     |
| Croatia                                                                                                                                     | 65.16     | 65.52    | 66.51     | 63.5     | 54.76     | 50.37     | 40.76     | 40.67     | 41.11     | 37.34     |
| Czech Republic                                                                                                                              | 147.78    | 187.7    | 151.2     | 135.41   | 131.11    | 91.36     | 89.12     | 102.75    | 112.33    | 106.08    |
| Hungary                                                                                                                                     | 150.56    | 188.61   | 147.83    | 130.16   | 127.26    | 108.04    | 96.48     | 97.95     | 89.79     | 88.85     |
| Macedonia                                                                                                                                   | 41.48     | 40.65    | 40.7      | 38.03    | 34.98     | 32        | 27.82     | 22.84     | 23.63     | 21.63     |
| Montenegro                                                                                                                                  | 10.71     | 10.64    | 10.65     | 10.86    | 9.72      | 9.02      | 8.17      | 7.61      | 7.61      | 7.16      |
| Poland                                                                                                                                      | 537.54    | 647.14   | 683.46    | 659.17   | 529.84    | 408.19    | 370.59    | 370.18    | 401.48    | 365.83    |
| Romania                                                                                                                                     | 421.29    | 431.17   | 405.4     | 373.73   | 289.52    | 232       | 215.86    | 212.51    | 175.73    | 172.89    |
| Serbia                                                                                                                                      | 147.31    | 157.82   | 153.57    | 149.96   | 137.98    | 129.43    | 100.72    | 93.37     | 84.99     | 80.41     |
| Slovakia                                                                                                                                    | 80.61     | 97.06    | 93.82     | 89.06    | 79.94     | 60.4      | 52.66     | 53.25     | 63.99     | 55.02     |
| Slovenia                                                                                                                                    | 28.07     | 29.94    | 29.88     | 25.29    | 22.23     | 18.92     | 17.87     | 18.61     | 22.34     | 19.97     |
| Central Asia                                                                                                                                | 1410.89   | 1482.68  | 1668.01   | 1940.49  | 1961.77   | 1622.39   | 1446.22   | 1606.4    | 1891.95   | 1974.81   |
| Armenia                                                                                                                                     | 61.58     | 69.54    | 84.9      | 89.32    | 78.36     | 47.27     | 37.08     | 38.72     | 41.71     | 44.95     |
| Azerbaijan                                                                                                                                  | 146.94    | 144.93   | 163.46    | 185.13   | 188.57    | 154.56    | 125.62    | 157.84    | 200.23    | 187.31    |
| Georgia                                                                                                                                     | 90.49     | 94.54    | 94.71     | 97.87    | 89.63     | 59.28     | 51.6      | 59.05     | 67.9      | 65.04     |
| Kazakhstan                                                                                                                                  | 387.72    | 388.78   | 396.36    | 418.56   | 373.91    | 281.14    | 239.57    | 304.53    | 380.55    | 393.74    |
| Kyrgyzstan                                                                                                                                  | 97.54     | 97.91    | 108.73    | 128.63   | 128.49    | 110.85    | 99.86     | 110       | 143.27    | 152.89    |
| Mongolia                                                                                                                                    | 52.36     | 55.17    | 62.81     | 70.9     | 68.83     | 53.22     | 48.19     | 51.98     | 67.9      | 77.93     |
| Tajikistan                                                                                                                                  | 111.37    | 120.62   | 142.65    | 180.34   | 198.42    | 172.44    | 158.1     | 168.99    | 206.55    | 251.42    |
| Turkmenistan                                                                                                                                | 69.06     | 76.1     | 89.37     | 111.55   | 125.58    | 115.78    | 100.68    | 103.31    | 114.2     | 120.95    |
| Uzbekistan                                                                                                                                  | 393.83    | 453.09   | 525.03    | 658.18   | 709.97    | 627.84    | 585.52    | 611.98    | 669.63    | 680.58    |
| Latin America and Caribbean                                                                                                                 | 8937.75   | 9699.2   | 10519.57  | 10819.81 | 11086.83  | 11032.91  | 10788.85  | 10451.54  | 10324.77  | 9815.42   |
| Central Latin America                                                                                                                       | 3756.02   | 4153.35  | 4525.07   | 4805.11  | 5125.18   | 5212.6    | 5139.48   | 4972.8    | 4841.85   | 4501.11   |
| Colombia                                                                                                                                    | 683.52    | 736.58   | 795.57    | 863.5    | 897.7     | 886.25    | 844.48    | 828.99    | 794.64    | 676.83    |
| Costa Rica                                                                                                                                  | 58.34     | 59.29    | 70.03     | 81.17    | 79.74     | 76.38     | 74.69     | 70.77     | 67.38     | 57.96     |
| El Salvador                                                                                                                                 | 145.92    | 162.16   | 160.34    | 150.66   | 154.4     | 154.93    | 145.18    | 131.6     | 117.77    | 103.01    |
| Guatemala                                                                                                                                   | 245.39    | 267.62   | 285.57    | 315.66   | 352.52    | 387.64    | 409.88    | 413.59    | 402.6     | 413.58    |
| Honduras                                                                                                                                    |           |          |           |          |           |           |           |           |           |           |

| Appendix Table 15A. Live births (in thousands) by location, both sexes combined, 1970, 1975, 1980, 1985, 1990, 1995, 2000, 2005, 2010, 2016 |          |          |          |          |          |          |          |          |          |          |
|---------------------------------------------------------------------------------------------------------------------------------------------|----------|----------|----------|----------|----------|----------|----------|----------|----------|----------|
| Country                                                                                                                                     | 1970     | 1975     | 1980     | 1985     | 1990     | 1995     | 2000     | 2005     | 2010     | 2016     |
| Grenada                                                                                                                                     | 2.84     | 2.83     | 2.66     | 3.3      | 2.56     | 2.39     | 2.09     | 1.91     | 1.83     | 1.7      |
| Guyana                                                                                                                                      | 22.02    | 23.66    | 24.33    | 21.89    | 22.55    | 21.65    | 19.16    | 16.04    | 13.5     | 13.63    |
| Haiti                                                                                                                                       | 205.9    | 220.59   | 239.07   | 259.68   | 264.44   | 270.87   | 286.56   | 310.32   | 320.85   | 327.45   |
| Jamaica                                                                                                                                     | 69.5     | 65.45    | 66.56    | 68.58    | 69.68    | 67.88    | 63.92    | 58.12    | 56.31    | 56.26    |
| Puerto Rico                                                                                                                                 | 71.64    | 78.17    | 71.78    | 63.05    | 61.89    | 56.23    | 50.62    | 45.11    | 43.07    | 41.46    |
| Saint Lucia                                                                                                                                 | 4.72     | 4.71     | 4.51     | 4.37     | 3.91     | 3.33     | 2.85     | 2.47     | 2.1      | 1.88     |
| Saint Vincent and the Grenadines                                                                                                            | 3.93     | 3.8      | 3.67     | 3.4      | 2.95     | 2.6      | 2.19     | 1.96     | 1.92     | 1.78     |
| Suriname                                                                                                                                    | 13.27    | 11.03    | 11.13    | 11.87    | 11.75    | 12.15    | 11.99    | 11.36    | 10.34    | 9.28     |
| Trinidad and Tobago                                                                                                                         | 27.96    | 28.13    | 33.55    | 34.55    | 24.02    | 20.85    | 18.92    | 18.87    | 16.72    | 12.67    |
| Virgin Islands, U.S.                                                                                                                        | 2.5      | 2.58     | 2.44     | 2.32     | 2.16     | 1.9      | 1.57     | 1.45     | 1.22     | 1.07     |
| Tropical Latin America                                                                                                                      | 3432.58  | 3723.74  | 4084.44  | 3997.26  | 3893.61  | 3770.65  | 3622.4   | 3468.2   | 3373.64  | 3136.82  |
| Brazil                                                                                                                                      | 3348.39  | 3632.09  | 3983.99  | 3876.39  | 3753.99  | 3623.11  | 3476.91  | 3329.32  | 3240.94  | 3010.21  |
| Paraguay                                                                                                                                    | 84.19    | 91.65    | 100.45   | 120.87   | 139.62   | 147.54   | 145.49   | 138.88   | 132.7    | 126.6    |
| Southeast Asia, East Asia, and Oceania                                                                                                      | 37870.19 | 34657.63 | 33687.13 | 35143.25 | 34898.71 | 31362.73 | 28329.85 | 26670.02 | 26525.22 | 23579.73 |
| East Asia                                                                                                                                   | 27729.88 | 24007.05 | 22420.3  | 23473.51 | 22938.99 | 19065.81 | 15939.2  | 14325.39 | 14136    | 12008.02 |
| China                                                                                                                                       | 26759.08 | 23098.53 | 21542.31 | 22562.43 | 21981.14 | 17980.88 | 14890.3  | 13481.17 | 13339.4  | 11209.66 |
| North Korea                                                                                                                                 | 588.27   | 531.01   | 479.35   | 593.29   | 631.21   | 758.7    | 763.78   | 637.81   | 611.31   | 606.75   |
| Taiwan (Province of China)                                                                                                                  | 382.52   | 377.52   | 398.63   | 317.79   | 326.64   | 326.23   | 285.12   | 206.41   | 185.29   | 191.61   |
| Southeast Asia                                                                                                                              | 9985.52  | 10476.66 | 11083.27 | 11472.55 | 11745.43 | 12058.61 | 12135.38 | 12008.36 | 12114.18 | 11277.65 |
| Cambodia                                                                                                                                    | 258.39   | 273.08   | 254.65   | 266.86   | 285.91   | 310.78   | 325.95   | 364.82   | 387.62   | 391.47   |
| Indonesia                                                                                                                                   | 4230.11  | 4287.71  | 4464.57  | 4461.71  | 4517.65  | 4785.55  | 4952.84  | 4939.77  | 4968.25  | 4409.86  |
| Laos                                                                                                                                        | 126.41   | 139.26   | 132.23   | 145.75   | 165.31   | 184.63   | 187.82   | 194.66   | 221.98   | 252.66   |
| Malaysia                                                                                                                                    | 350.63   | 378.65   | 418.19   | 490.7    | 539.08   | 539.08   | 534.02   | 487.07   | 526.99   | 508.07   |
| Maldives                                                                                                                                    | 3.06     | 3.13     | 3.48     | 4.09     | 4.6      | 4.9      | 4.99     | 5.92     | 6.86     | 5.84     |
| Mauritius                                                                                                                                   | 21.22    | 23.13    | 23.59    | 17.85    | 22.1     | 21.69    | 19.65    | 16.99    | 13.29    | 13.29    |
| Myanmar                                                                                                                                     | 766.19   | 870.55   | 959.11   | 1045.67  | 1081.14  | 1083.1   | 1098.55  | 1095.5   | 1029.96  | 924.17   |
| Philippines                                                                                                                                 | 1287.95  | 1448.66  | 1637.6   | 1785.39  | 1937.89  | 2066.3   | 2174.54  | 2258.28  | 2307.37  | 2423.92  |
| Sri Lanka                                                                                                                                   | 360.55   | 373.14   | 426.85   | 382.36   | 365.72   | 349.56   | 349.57   | 369.5    | 353.08   | 272.19   |
| Seychelles                                                                                                                                  | 1.91     | 1.79     | 1.89     | 1.87     | 1.56     | 1.59     | 1.42     | 1.68     | 1.74     | 1.56     |
| Thailand                                                                                                                                    | 1394.27  | 1459.17  | 1377.29  | 1224.05  | 1193.59  | 1159.82  | 1025.51  | 851.57   | 710.62   | 556.29   |
| Timor-Leste                                                                                                                                 | 22.62    | 24.8     | 23.46    | 25.23    | 25.69    | 26.55    | 19.02    | 26.28    | 35.36    | 33.03    |
| Vietnam                                                                                                                                     | 1162.22  | 1193.6   | 1360.37  | 1621.02  | 1634.84  | 1525.05  | 1441.5   | 1468.33  | 1550.74  | 1485.29  |
| Oceania                                                                                                                                     | 154.8    | 173.92   | 183.56   | 197.19   | 214.3    | 238.3    | 255.27   | 264.26   | 275.05   | 294.07   |
| American Samoa                                                                                                                              | 1.08     | 1.2      | 1.27     | 1.46     | 1.72     | 1.72     | 1.71     | 1.63     | 1.54     | 1.5      |
| Federated States of Micronesia                                                                                                              | 3.07     | 2.88     | 3.51     | 3.72     | 3.54     | 3.27     | 2.79     | 2.19     | 1.96     | 1.97     |
| Fiji                                                                                                                                        | 18.23    | 20.43    | 20.72    | 20.31    | 17.12    | 15.38    | 13.61    | 12.38    | 11.42    | 9.96     |
| Guam                                                                                                                                        | 2.31     | 2.63     | 2.91     | 3.14     | 3.56     | 3.64     | 3.6      | 3.37     | 3.29     | 3.48     |
| Kiribati                                                                                                                                    | 2.23     | 2.56     | 2.81     | 2.88     | 3.11     | 2.97     | 2.92     | 2.91     | 2.91     | 2.82     |
| Marshall Islands                                                                                                                            | 0.94     | 1.11     | 1.22     | 1.4      | 1.6      | 1.85     | 1.9      | 1.94     | 2.02     | 2.08     |
| Northern Mariana Islands                                                                                                                    | 0.43     | 0.52     | 0.6      | 1.08     | 1.9      | 2.41     | 2.66     | 2.83     | 2.96     | 3.18     |
| Papua New Guinea                                                                                                                            | 107.23   | 121.64   | 127.18   | 138.2    | 155.23   | 178.27   | 195.4    | 204.42   | 214.86   | 235.56   |
| Samoa                                                                                                                                       | 5.65     | 5.66     | 5.78     | 5.77     | 5.6      | 5.6      | 5.55     | 5.67     | 5.7      | 5.42     |
| Solomon Islands                                                                                                                             | 6.73     | 7.74     | 9.19     | 10.23    | 11.32    | 13.27    | 15.12    | 16.27    | 17.18    | 16.99    |
| Tonga                                                                                                                                       | 3.02     | 3.01     | 3.13     | 3.21     | 3.35     | 3.17     | 2.99     | 3.12     | 3.02     | 2.61     |
| Vanuatu                                                                                                                                     | 3.88     | 4.55     | 5.25     | 5.79     | 6.24     | 6.76     | 7.03     | 7.51     | 8.19     | 8.51     |
| North Africa and Middle East                                                                                                                | 8085.67  | 8958.17  | 9844.67  | 10066.62 | 10809.83 | 10825.82 | 11268.35 | 12013.2  | 13162.22 | 12621.29 |
| North Africa and Middle East                                                                                                                | 8085.67  | 8958.17  | 9844.67  | 10066.62 | 10809.83 | 10825.82 | 11268.35 | 12013.2  | 13162.22 | 12621.29 |
| Afghanistan                                                                                                                                 | 533.2    | 589.12   | 606.46   | 522.8    | 523.14   | 669.94   | 752.9    | 902.59   | 941.32   | 1160.01  |
| Algeria                                                                                                                                     | 597.26   | 655.53   | 723.76   | 796.88   | 844.62   | 930.19   | 1034.1   | 1064.52  | 1007.9   | 870.3    |
| Bahrain                                                                                                                                     | 7.29     | 8.7      | 10.86    | 13.6     | 14.1     | 13.28    | 13.41    | 12.71    | 19.12    | 18.77    |
| Egypt                                                                                                                                       | 1466.25  | 1558.22  | 1640.14  | 1716.36  | 1706.71  | 1634.1   | 1578.97  | 1917.06  | 2203.45  | 2125.74  |
| Iran                                                                                                                                        | 1340.86  | 1508.63  | 1744.84  | 1998.7   | 1951.36  | 1395.69  | 1280.31  | 1535.05  | 1722.58  | 1540.7   |
| Iraq                                                                                                                                        | 449.03   | 508.05   | 571.41   | 630.1    | 667.63   | 751.85   | 851.9    | 1000.72  | 1413.25  | 1656.91  |
| Jordan                                                                                                                                      | 92.41    | 98.95    | 93.02    | 105.02   | 110.36   | 143.81   | 143.07   | 156.04   | 186.9    | 197.32   |
| Kuwait                                                                                                                                      | 37.94    | 46.6     | 53.02    | 55.09    | 42.93    | 45.28    | 41.91    | 47.89    | 59.05    | 53.66    |
| Lebanon                                                                                                                                     | 93.8     | 88.73    | 89.9     | 80.58    | 69.19    | 65.57    | 56.79    | 53.28    | 55.46    | 68.65    |
| Libya                                                                                                                                       | 76.09    | 92.99    | 91.54    | 101.58   | 111.15   | 124.65   | 136.07   | 137.73   | 122.19   | 78.01    |
| Morocco                                                                                                                                     | 553.76   | 591.86   | 660.93   | 724.85   | 749.87   | 704.63   | 632.02   | 565.82   | 512.06   | 443.38   |
| Palestine                                                                                                                                   | 55.05    | 60.03    | 63.28    | 72.09    | 85.87    | 103.42   | 115.98   | 128.67   | 192.55   | 232.96   |
| Oman                                                                                                                                        | 39.43    | 46.23    | 55.86    | 66.78    | 73.52    | 81.06    | 92.72    | 91.83    | 86.37    | 90.73    |
| Qatar                                                                                                                                       | 4        | 4.93     | 7.51     | 9.62     | 11.07    | 10.8     | 10.71    | 14.14    | 21.6     | 26.09    |
| Saudi Arabia                                                                                                                                | 293.1    | 363.58   | 442.3    | 590.66   | 642.77   | 648.97   | 703.02   | 664.29   | 587.01   | 449.88   |
| Sudan                                                                                                                                       | 383.9    | 428.92   | 485.56   | 536.86   | 608.55   | 771.48   | 899.45   | 932.26   | 924.85   | 875.61   |
| Syria                                                                                                                                       | 274.54   | 321.9    | 364.24   | 409.35   | 446.81   | 483.87   | 504.1    | 488.91   | 509.4    | 296.92   |
| Tunisia                                                                                                                                     | 179.73   | 197.23   | 219.28   | 229.84   | 218.91   | 191.14   | 166.57   | 171.1    | 186.46   | 152.02   |
| Turkey                                                                                                                                      | 1289.46  | 1438.19  | 1508.33  | 1450.19  | 1333.61  | 1338.68  | 1310.25  | 1270.05  | 1283.46  | 1188.41  |
| United Arab Emirates                                                                                                                        | 11.43    | 20.12    | 39.18    | 55.08    | 56.96    | 68.9     | 76.39    | 105.41   | 172.3    | 153.44   |
| Yemen                                                                                                                                       | 307.16   | 329.66   | 373.25   | 440.59   | 540.7    | 648.48   | 707.69   | 753.12   | 954.96   | 941.79   |
| South Asia                                                                                                                                  | 26028.67 | 28201.58 | 30826.45 | 33100.2  | 34068.74 | 34236.36 | 34379.78 | 34574.43 | 34209.61 | 30167.22 |
| South Asia                                                                                                                                  | 26028.67 | 28201.58 | 30826.45 | 33100.2  | 34068.74 | 34236.36 | 34379.78 | 34574.43 | 34209.61 | 30167.22 |
| Bangladesh                                                                                                                                  | 2653.97  | 2606.14  | 2841.34  | 3205.13  | 3422.78  | 3304.79  | 3235.34  | 3276.6   | 3163.71  | 2808.85  |
| Bhutan                                                                                                                                      | 13.93    | 15.66    | 17.01    | 18.29    | 20.47    | 18.8     | 19.94    | 19.96    | 18.24    | 15.31    |
| India                                                                                                                                       | 20267.82 | 22133.93 | 23933.97 | 25088.56 | 25674.35 | 26011.54 | 26412.06 | 26471.17 | 25404.63 | 21807.82 |
| Nepal                                                                                                                                       | 500.79   | 551.56   | 606.58   | 667.36   | 727.02   | 751.25   | 777.49   | 715.79   | 762.88   | 828.76   |
| Pakistan                                                                                                                                    | 2592.16  | 2894.28  | 3427.57  | 4120.87  | 4224.12  | 4149.99  | 3934.95  | 4000.91  | 4860.14  | 4706.49  |
| Sub-Saharan Africa                                                                                                                          | 13030.25 | 14477.73 | 16178.29 | 17949.77 | 20034.47 | 22148.53 | 24744.39 | 28082.99 | 31642.91 | 35366.48 |
| Southern Sub-Saharan Africa                                                                                                                 | 943.74   | 1058.17  | 1183.39  | 1335.16  | 1460.75  | 1508.16  | 1578.53  | 1672.54  | 1852.63  | 1761.05  |
| Botswana                                                                                                                                    | 26.06    | 29.57    | 34.38    | 38.29    | 40.49    | 43.76    | 45.95    | 48.74    | 53.15    | 54.53    |
| Lesotho                                                                                                                                     | 38.39    | 41.29    | 44.39    | 47.05    | 47.26    | 50.54    | 52.48    | 52.88    | 55.15    | 55.83    |
| Namibia                                                                                                                                     | 30.82    | 34.45    | 36.67    | 41.1     | 53.6     | 58.68    | 61.35    | 59.42    | 64.36    | 72.07    |
| South Africa                                                                                                                                | 634.03   | 706.23   | 786.01   | 868.49   | 927.1    | 950.63   | 993.69   | 1048.3   | 1039.83  | 1072.2   |
| Swaziland                                                                                                                                   | 17.81    | 19.76    | 22.2     | 25.4     | 30.3     | 30.77    | 33.75    | 32.96    | 43.99    | 44.34    |
| Zimbabwe                                                                                                                                    | 196.64   | 226.86   | 259.74   | 314.83   | 362      | 373.77   | 391.29   | 426.96   | 504.56   | 553.65   |
| Western Sub-Saharan Africa                                                                                                                  | 5472.53  | 5972.66  | 6570.06  | 7228.2   | 8109.05  | 9063.3   | 10274.06 | 11785.65 | 13404.65 | 14748.41 |
| Benin                                                                                                                                       | 135.33   | 148.13   | 166.34   | 187.68   | 209.7    | 243.1    | 276.24   | 326.92   | 372.85   | 438.87   |
| Burkina Faso                                                                                                                                | 277.97   | 298.1    | 323.12   | 361.97   | 410.75   | 452.85   | 518.96   | 603.87   | 677.62   | 735.65   |
| Cameroon                                                                                                                                    | 311.54   | 335.45   | 370.4    | 420.61   | 477.95   | 529.92   | 591.35   | 676.36   | 781.88   | 877.4    |
| Cape Verde                                                                                                                                  | 8.98     | 8.77     | 9.79     | 11.92    | 12.37    | 13.23    | 13.76    | 14.94    | 15.49    | 15.13    |
| Chad                                                                                                                                        | 173.68   | 194.67   | 211.16   | 232.35   | 266.27   | 305.76   | 358.32   | 432.75   | 516.22   | 637.56   |
| Cote d'Ivoire                                                                                                                               | 233.53   | 279.59   | 341.91   | 426.48   | 472.59   | 514.16   | 587.26   | 641.36   | 710.94   | 823.29   |
| The Gambia                                                                                                                                  | 25.2     | 28.46    | 32.53    | 36.21    | 44.71    | 51.74    | 59.06    | 65.41    | 71.89    | 80.69    |
| Ghana                                                                                                                                       | 383.77   | 413.42   | 439.64   | 512.7    | 557.92   | 575.41   | 612.06   | 726.66   | 884.05   | 933.7    |
| Guinea                                                                                                                                      | 181.33   | 187.3    | 191.71   | 210.79   | 243.24   | 307.65   | 338.62   | 369.73   | 412.52   | 467.91   |
| Guinea-Bissau                                                                                                                               | 30.29    | 33.74    | 36.47    | 38.86    | 41.77    | 45.59    | 50.54    | 56.53    | 62.61    | 69.24    |
| Liberia                                                                                                                                     | 70.8     | 78.49    | 88.44    | 99.47    | 93.62    | 91.59    | 124.25   | 129.82   | 144.96   | 158.5    |
| Mali                                                                                                                                        | 293.35   | 317.37   | 342.61   | 372.28   | 390.53   | 445.49   | 511.94   | 585.16   | 656.36   | 739.52   |
| Mauritania                                                                                                                                  | 43.38    | 48.34    | 54.45    | 61.27    | 68.12    | 75.67    | 85.13    | 96.74    | 104.61   | 111.6    |
| Niger                                                                                                                                       | 245.08   | 272.72   | 307.71   | 347.47   | 396.17   | 463.41   | 538.69   | 620.71   | 722.95   | 889.95   |
| Nigeria                                                                                                                                     | 2659.96  | 2887.42  | 3173.61  | 3369.63  | 3817.86  | 4305.59  | 4912.85  | 5610.16  | 6329.15  | 6714.13  |
| Sao Tome and Principe                                                                                                                       | 3        | 3.36     | 3.8      | 4.15     | 4.47     | 4.92     | 5.45     | 5.89     | 6.46     | 7.05     |
| Senegal                                                                                                                                     | 186.86   | 211.69   | 230.78   | 259.42   | 295.36   | 327.85   | 356.18   | 428.39   | 496.7    | 560.81   |
| Sierra Leone                                                                                                                                | 115.11   | 123.35   | 132.79   | 142.21   | 154.7    | 147.87   | 154.04   | 193.12   | 217.66   | 243.0    |

Appendix Table 15A. Live births (in thousands) by location, both sexes combined, 1970, 1975, 1980, 1985, 1990, 1995, 2000, 2005, 2010, 2016

| Country                          | 1970    | 1975    | 1980    | 1985    | 1990    | 1995    | 2000    | 2005    | 2010    | 2016    |
|----------------------------------|---------|---------|---------|---------|---------|---------|---------|---------|---------|---------|
| Malawi                           | 263.68  | 289.08  | 320.16  | 355.35  | 462.45  | 450.66  | 495.19  | 543.73  | 628.83  | 719.85  |
| Mozambique                       | 429.78  | 484.44  | 556.82  | 573.8   | 543.28  | 666.96  | 768.14  | 891.23  | 1020.29 | 1104.39 |
| Rwanda                           | 190     | 226.83  | 272.44  | 311.06  | 327.42  | 271.69  | 326.31  | 377.51  | 392.33  | 400.04  |
| Somalia                          | 129.18  | 145.33  | 225.93  | 218.74  | 220.7   | 210.13  | 227.09  | 246.93  | 268.47  | 300.57  |
| South Sudan                      | 219.11  | 237.87  | 265.6   | 304.96  | 316.8   | 294.3   | 353.99  | 426.84  | 532.6   | 681.17  |
| Tanzania                         | 751.01  | 855.52  | 964.43  | 1075.69 | 1193.56 | 1355.85 | 1438.75 | 1610.25 | 1814.46 | 1977.41 |
| Uganda                           | 526.31  | 595.54  | 678.53  | 770.57  | 885.08  | 995.12  | 1135.4  | 1310.07 | 1491.38 | 1688.58 |
| Zambia                           | 228.59  | 261.81  | 296.36  | 343.04  | 377.33  | 401.05  | 446.29  | 496.99  | 559.35  | 638.87  |
| Central Sub-Saharan Africa       | 1463.94 | 1607.81 | 1797.71 | 2003.44 | 2249.47 | 2616.67 | 2979.93 | 3471.1  | 4031.42 | 4839.23 |
| Angola                           | 301.42  | 341.82  | 396.8   | 468.5   | 528.11  | 615.75  | 704.17  | 820.36  | 955.63  | 1108.82 |
| Central African Republic         | 71.94   | 77.05   | 85.6    | 98.74   | 106.68  | 120.85  | 132.93  | 141.08  | 156.68  | 178.57  |
| Congo                            | 57.49   | 64.81   | 72.51   | 82.1    | 93.25   | 105.87  | 120.5   | 131.98  | 152.29  | 161.48  |
| Democratic Republic of the Congo | 996     | 1091.7  | 1209.78 | 1312.29 | 1473.98 | 1722.48 | 1966.43 | 2315.86 | 2698.61 | 3314.51 |
| Equatorial Guinea                | 12.43   | 7.84    | 7.47    | 14.01   | 16.3    | 16.87   | 16.47   | 17.44   | 19.56   | 22.67   |
| Gabon                            | 24.66   | 24.58   | 25.55   | 27.8    | 31.15   | 34.85   | 39.42   | 44.38   | 48.65   | 53.19   |



Appendix Table 15B. Live births (in thousands) by location, males, 1970, 1975, 1980, 1985, 1990, 1995, 2000, 2005, 2010, 2016

| Country                                          | 1970     | 1975    | 1980     | 1985     | 1990     | 1995     | 2000     | 2005     | 2010     | 2016     |
|--------------------------------------------------|----------|---------|----------|----------|----------|----------|----------|----------|----------|----------|
| Global                                           | 58589-16 | 59101-7 | 61896-83 | 65407-08 | 67083-72 | 65388-99 | 65159-37 | 66555-63 | 68970-04 | 66507-94 |
| High-income                                      | 7077-82  | 6307-06 | 6387-2   | 6154-82  | 6361-42  | 6024-93  | 6042-21  | 6072-42  | 6075-51  | 5948     |
| High-income North America                        | 2033-01  | 1767-72 | 2034-27  | 2114-54  | 2329-39  | 2202-93  | 2240-73  | 2321-8   | 2277-86  | 2277-69  |
| Canada                                           | 183-95   | 180-84  | 188-93   | 192-94   | 207-75   | 189-15   | 169-67   | 177-61   | 191-91   | 206-84   |
| Greenland                                        | 0-78     | 0-52    | 0-51     | 0-54     | 0-57     | 0-5      | 0-42     | 0-38     | 0-38     | 0-35     |
| United States                                    | 1848-28  | 1586-37 | 1844-83  | 1921-05  | 2121-08  | 2013-28  | 2070-64  | 2143-81  | 2025-57  | 2070-49  |
| Australasia                                      | 168-1    | 144-81  | 142-92   | 151-29   | 159-35   | 155-24   | 163-02   | 163-02   | 182-66   | 183-55   |
| Australia                                        | 135-97   | 116-69  | 117-07   | 124-64   | 132-81   | 129-94   | 126-32   | 132-99   | 150-93   | 154-26   |
| New Zealand                                      | 32-13    | 28-12   | 25-85    | 26-65    | 30-43    | 29-41    | 28-92    | 30-03    | 31-74    | 29-28    |
| High-income Asia Pacific                         | 1533-72  | 1407-18 | 1279-22  | 1100-96  | 1024-47  | 987-86   | 921-46   | 801-97   | 812-73   | 708-2    |
| Brunei                                           | 1-89     | 2-33    | 2-97     | 3-21     | 3-64     | 3-94     | 4-14     | 3-67     | 3-43     | 3-36     |
| Japan                                            | 1015-77  | 941-44  | 805-47   | 734-65   | 630-65   | 611-18   | 603-77   | 558-72   | 552-41   | 480-69   |
| Singapore                                        | 23-51    | 20-39   | 21-22    | 21-89    | 24-94    | 24-9     | 22-32    | 18-71    | 18-21    | 17-72    |
| South Korea                                      | 492-56   | 443-02  | 449-56   | 341-22   | 365-23   | 347-84   | 291-23   | 220-87   | 238-69   | 206-44   |
| Western Europe                                   | 2941-46  | 2543-78 | 2464-77  | 2321-71  | 2355-32  | 2207-94  | 2218-36  | 2279-45  | 2338-83  | 2261-2   |
| Andorra                                          | 0-08     | 0-11    | 0-15     | 0-21     | 0-26     | 0-31     | 0-31     | 0-31     | 0-33     | 0-31     |
| Austria                                          | 56-5     | 46-41   | 46-99    | 44-22    | 46-98    | 45-59    | 39-74    | 40-37    | 40-26    | 42-32    |
| Belgium                                          | 72-26    | 60-39   | 63-01    | 59-29    | 63-69    | 59-22    | 59-65    | 62-17    | 65-35    | 66-5     |
| Cyprus                                           | 6-98     | 5-47    | 6-27     | 6-21     | 6-17     | 5-2      | 4-32     | 4-35     | 4-98     | 5-35     |
| Denmark                                          | 37-02    | 35-25   | 28-45    | 27-98    | 32-61    | 35-13    | 34-16    | 33-45    | 31-73    | 30-68    |
| Finland                                          | 31-69    | 33-85   | 32-41    | 31-54    | 33-53    | 31-84    | 29-07    | 29-84    | 30-91    | 30-46    |
| France                                           | 438-18   | 370-11  | 410-13   | 395-4    | 389-84   | 375      | 397-12   | 404-3    | 409-35   | 406-26   |
| Germany                                          | 527-15   | 406-99  | 436-64   | 422-94   | 439-03   | 401-11   | 386-92   | 351-92   | 341-09   | 358-51   |
| Greece                                           | 73-17    | 73-47   | 73-66    | 58-22    | 53-03    | 53-46    | 53-09    | 57-11    | 58-03    | 46-88    |
| Iceland                                          | 2-11     | 2-2     | 2-26     | 1-95     | 2-38     | 2-13     | 2-13     | 2-4      | 2-4      | 2-17     |
| Ireland                                          | 34-19    | 34-46   | 37-61    | 31-98    | 27-67    | 25-64    | 28-87    | 32-41    | 39-12    | 32-62    |
| Israel                                           | 39-02    | 45-36   | 52-1     | 53-86    | 52-98    | 58-97    | 68-07    | 75-2     | 83-82    | 88-07    |
| Italy                                            | 469-28   | 422-82  | 329-61   | 295-93   | 294-59   | 270-82   | 277-3    | 285-97   | 283-45   | 253-32   |
| Luxembourg                                       | 2-22     | 1-99    | 2-18     | 2-13     | 2-52     | 2-82     | 2-86     | 2-78     | 2-91     | 3-33     |
| Malta                                            | 2-81     | 3-08    | 2-94     | 2-93     | 3        | 2-57     | 2-07     | 1-87     | 2-01     | 1-94     |
| Netherlands                                      | 117-99   | 89-88   | 92-42    | 92-87    | 101-48   | 97-09    | 105-19   | 96-98    | 94-22    | 91-03    |
| Norway                                           | 32-45    | 27-67   | 25-99    | 26-45    | 31-29    | 31-15    | 29-79    | 29-64    | 31-02    | 31-98    |
| Portugal                                         | 93-32    | 91-58   | 78-91    | 66-01    | 59-91    | 55-73    | 59-37    | 54-73    | 51-27    | 42-07    |
| Spain                                            | 343-44   | 346-91  | 281-57   | 228-33   | 202-97   | 186-45   | 207-12   | 241-76   | 248-41   | 217-21   |
| Sweden                                           | 57-15    | 51-78   | 49-45    | 51-62    | 50-88    | 50-88    | 46-94    | 53-62    | 59-35    | 60-88    |
| Switzerland                                      | 49-69    | 39-32   | 37-75    | 38-44    | 42-84    | 42-04    | 38-73    | 37-72    | 41-13    | 43-86    |
| United Kingdom                                   | 454-75   | 354-69  | 374-28   | 383-19   | 404-99   | 374-72   | 346-03   | 380-75   | 417-7    | 405-48   |
| England                                          | 370-04   | 288-16  | 305-57   | 317      | 339-48   | 314-54   | 291-36   | 323-25   | 356-09   | 346-2    |
| East Midlands                                    | 29-14    | 23-59   | 25-11    | 25-24    | 27-39    | 25-49    | 23-37    | 26-12    | 23-21    | 27-45    |
| East of England                                  | 34-53    | 28-09   | 30-73    | 32-21    | 34-82    | 32-34    | 30-44    | 34-3     | 37-67    | 36-3     |
| Greater London                                   | 58-77    | 45-85   | 48-06    | 51-83    | 57-19    | 54-8     | 54-08    | 60-55    | 70-3     | 68-41    |
| North East England                               | 22-48    | 16-63   | 17-32    | 17-34    | 17-58    | 15-76    | 13-83    | 14-5     | 15-46    | 14-96    |
| North West England                               | 60-75    | 44-98   | 46-83    | 47-28    | 49-49    | 43-55    | 39-18    | 42-99    | 46-29    | 43-65    |
| South East England                               | 50-88    | 41-39   | 45-21    | 47-78    | 51-51    | 48-16    | 44-49    | 49-53    | 55-29    | 53-87    |
| South West England                               | 29-16    | 23-85   | 25-77    | 27-08    | 29-22    | 27-91    | 25-29    | 28-13    | 31-27    | 30-88    |
| West Midlands                                    | 44-83    | 33-67   | 34-79    | 35-69    | 37-82    | 34-41    | 31-68    | 35-02    | 37-96    | 37-61    |
| Yorkshire and the Humber                         | 39-46    | 30-09   | 31-74    | 32-52    | 34-43    | 32-13    | 28-98    | 33-61    | 33-66    | 33-08    |
| Northern Ireland                                 | 15-64    | 14-52   | 14-94    | 14-55    | 13-38    | 12-44    | 11-29    | 11-65    | 13       | 12-29    |
| Scotland                                         | 45-09    | 33-88   | 35-21    | 33-42    | 33-74    | 30-41    | 27-1     | 28-54    | 29-94    | 29-58    |
| Wales                                            | 23-91    | 18-12   | 18-56    | 18-22    | 18-39    | 17-34    | 16-29    | 17-32    | 18-67    | 17-35    |
| Southern Latin America                           | 401-54   | 443-57  | 466-02   | 466-32   | 489      | 466-86   | 506-42   | 506-18   | 523-42   | 517-36   |
| Argentina                                        | 247-21   | 297-1   | 320-45   | 313-47   | 316-34   | 298-4    | 350-56   | 360-67   | 374-31   | 370-01   |
| Chile                                            | 125-22   | 118-92  | 121-65   | 128-38   | 139-42   | 139-42   | 128-34   | 120-81   | 125-06   | 122-54   |
| Uruguay                                          | 29-11    | 27-54   | 23-92    | 24-46    | 25-96    | 29-03    | 27-51    | 24-71    | 24-06    | 24-81    |
| Central Europe, Eastern Europe, and Central Asia | 3236-76  | 3492-92 | 3593-2   | 3836-88  | 3358-66  | 2579-91  | 2315-66  | 2509-75  | 2870-03  | 2907-68  |
| Eastern Europe                                   | 1531-3   | 1631-04 | 1681-31  | 1835-43  | 1486-88  | 1057-76  | 964-27   | 1082-09  | 1293-68  | 1328-87  |
| Belarus                                          | 76       | 75-62   | 80-05    | 86-4     | 72-87    | 52-85    | 48       | 49-15    | 56-98    | 59-4     |
| Estonia                                          | 11-19    | 11      | 11-46    | 12-24    | 10-81    | 6-98     | 6-67     | 7-53     | 7-72     | 7-04     |
| Latvia                                           | 17-83    | 17-65   | 18-32    | 21-2     | 18-72    | 10-82    | 10-18    | 11-13    | 10-05    | 11-48    |
| Lithuania                                        | 28-61    | 26-55   | 26-12    | 30-11    | 28-97    | 20-54    | 17-07    | 15-15    | 16-26    | 15-08    |
| Moldova                                          | 38-98    | 42-24   | 44-46    | 47-74    | 40-05    | 28-58    | 21-96    | 23-47    | 23-54    | 23-06    |
| Russia                                           | 984-45   | 1078-33 | 1116-85  | 1238-02  | 982-18   | 687-97   | 661-01   | 748-16   | 917-7    | 965-87   |
| Ukraine                                          | 374-25   | 379-66  | 384-05   | 399-73   | 333-28   | 250-01   | 199-37   | 227-49   | 261-43   | 246-94   |
| Central Europe                                   | 980-54   | 1100-26 | 1055-33  | 1005-67  | 861-08   | 683-9    | 604-2    | 597-1    | 598-44   | 560-33   |
| Albania                                          | 29-53    | 32-48   | 36-85    | 41-68    | 44-08    | 35-69    | 26-2     | 19-91    | 18-07    | 20-47    |
| Bosnia and Herzegovina                           | 43-33    | 39-54   | 37-37    | 40-91    | 36-92    | 25-93    | 17-28    | 17-06    | 17-84    | 16-23    |
| Bulgaria                                         | 69-98    | 74-57   | 65-13    | 62-5     | 51-96    | 36-78    | 36-68    | 36-24    | 37-01    | 32-95    |
| Croatia                                          | 33-51    | 33-7    | 34-21    | 32-66    | 28-17    | 25-91    | 20-97    | 20-92    | 21-14    | 19-2     |
| Czech Republic                                   | 75-97    | 96-5    | 77-73    | 69-61    | 67-4     | 46-97    | 45-82    | 52-82    | 57-75    | 54-54    |
| Hungary                                          | 77-47    | 97-05   | 76-07    | 66-98    | 65-48    | 55-59    | 49-64    | 50-4     | 46-2     | 45-72    |
| Macedonia                                        | 21-29    | 20-86   | 20-88    | 19-51    | 17-95    | 16-42    | 14-28    | 11-72    | 12-12    | 11-1     |
| Montenegro                                       | 5-56     | 5-52    | 5-53     | 5-64     | 5-05     | 4-68     | 4-24     | 3-95     | 3-93     | 3-68     |
| Poland                                           | 276-09   | 332-38  | 351-04   | 338-56   | 272-13   | 209-65   | 190-34   | 190-13   | 206-21   | 187-9    |
| Romania                                          | 216-58   | 221-66  | 208-41   | 192-13   | 148-84   | 119-27   | 110-97   | 109-25   | 90-34    | 88-88    |
| Serbia                                           | 75-52    | 80-91   | 78-73    | 76-88    | 70-74    | 66-36    | 51-64    | 47-37    | 43-57    | 41-23    |
| Slovakia                                         | 41-29    | 49-71   | 48-05    | 45-61    | 40-95    | 30-94    | 26-97    | 27-27    | 32-77    | 28-18    |
| Slovenia                                         | 14-41    | 15-36   | 15-33    | 12-98    | 11-41    | 9-71     | 9-17     | 9-55     | 11-47    | 10-25    |
| Central Asia                                     | 724-92   | 761-62  | 856-56   | 995-77   | 1010-7   | 838-25   | 747-2    | 830-56   | 977-91   | 1018-48  |
| Armenia                                          | 31-64    | 35-65   | 43-49    | 45-92    | 40-63    | 25-29    | 20-02    | 20-72    | 22-2     | 23-84    |
| Azerbaijan                                       | 75-68    | 74-65   | 84-19    | 95-35    | 97-7     | 82       | 67-73    | 84-97    | 107-45   | 99-17    |
| Georgia                                          | 46-9     | 49      | 49-09    | 50-73    | 46-45    | 31-2     | 27-15    | 31-07    | 35-66    | 34-08    |
| Kazakhstan                                       | 199-96   | 200-51  | 204-42   | 215-38   | 192-4    | 144-86   | 123-1    | 156-7    | 195-91   | 202-61   |
| Kyrgyzstan                                       | 50-1     | 50-29   | 55-85    | 65-91    | 65-93    | 57-17    | 51-15    | 56-6     | 73-65    | 78-6     |
| Mongolia                                         | 26-57    | 27-99   | 31-87    | 35-97    | 34-92    | 27       | 24-45    | 26-38    | 34-45    | 39-54    |
| Tajikistan                                       | 57-04    | 61-78   | 73-06    | 92-37    | 101-63   | 88-56    | 80-98    | 86-56    | 105-79   | 128-78   |
| Turkmenistan                                     | 35-3     | 38-9    | 45-69    | 57-03    | 64-2     | 59-19    | 51-47    | 52-81    | 58-38    | 61-83    |
| Uzbekistan                                       | 201-72   | 222-85  | 268-92   | 337-12   | 366-82   | 323-21   | 301-15   | 314-76   | 344-41   | 350-04   |
| Latin America and Caribbean                      | 4578-28  | 4968-16 | 5388-25  | 5542-08  | 5678-9   | 5651-26  | 5526-24  | 5353-41  | 5288-48  | 5027-55  |
| Central Latin America                            | 1923-82  | 2127-32 | 2317-72  | 2461-16  | 2625-09  | 2669-87  | 2632-42  | 2547-05  | 2479-97  | 2305-45  |
| Colombia                                         | 350-1    | 377-27  | 407-49   | 442-28   | 459-8    | 453-93   | 432-54   | 424-6    | 407-01   | 346-67   |
| Costa Rica                                       | 29-88    | 30-37   | 35-87    | 41-57    | 40-84    | 39-12    | 38-26    | 36-25    | 34-51    | 29-68    |
| El Salvador                                      | 74-74    | 83-06   | 82-13    | 77-17    | 79-08    | 79-36    | 74-36    | 67-41    | 60-32    | 52-76    |
| Guatemala                                        | 125-69   | 137-08  | 146-27   | 161-68   | 180-56   | 198-55   | 209-94   | 211-84   | 206-21   | 211-83   |
| Honduras                                         | 64-2     | 71-53   | 79-02    | 87-48    | 92-19    | 91-62    | 89-93    | 90-61    | 96-71    | 100-4    |
| Mexico                                           | 1011-83  | 1129-72 | 1237-43  | 1307-43  | 1376-22  |          |          |          |          |          |

Appendix Table 15B. Live births (in thousands) by location, males, 1970, 1975, 1980, 1985, 1990, 1995, 2000, 2005, 2010, 2016

| Country                                | 1970     | 1975     | 1980     | 1985     | 1990     | 1995     | 2000     | 2005     | 2010     | 2016      |
|----------------------------------------|----------|----------|----------|----------|----------|----------|----------|----------|----------|-----------|
| Grenada                                | 1.46     | 1.45     | 1.36     | 1.69     | 1.31     | 1.22     | 1.07     | 0.98     | 0.94     | 0.87      |
| Guyana                                 | 11.28    | 12.12    | 12.46    | 11.21    | 11.55    | 11.09    | 9.81     | 8.22     | 6.91     | 6.98      |
| Haiti                                  | 105.46   | 112.99   | 122.45   | 133.01   | 135.45   | 138.74   | 146.77   | 158.94   | 164.34   | 167.72    |
| Jamaica                                | 35.6     | 33.52    | 34.09    | 35.12    | 35.69    | 34.77    | 32.74    | 29.77    | 28.84    | 28.82     |
| Puerto Rico                            | 36.74    | 40.1     | 36.82    | 32.34    | 31.74    | 28.84    | 25.96    | 23.14    | 22.09    | 21.27     |
| Saint Lucia                            | 2.4      | 2.39     | 2.29     | 2.22     | 1.99     | 1.69     | 1.45     | 1.25     | 1.06     | 0.95      |
| Saint Vincent and the Grenadines       | 1.99     | 1.93     | 1.86     | 1.73     | 1.5      | 1.32     | 1.11     | 1        | 0.97     | 0.9       |
| Suriname                               | 6.89     | 5.73     | 5.78     | 6.16     | 6.1      | 6.31     | 6.22     | 5.9      | 5.36     | 4.8       |
| Trinidad and Tobago                    | 14.24    | 14.33    | 17.09    | 17.6     | 12.23    | 10.62    | 9.64     | 9.61     | 8.51     | 6.45      |
| Virgin Islands, U.S.                   | 1.29     | 1.33     | 1.25     | 1.19     | 1.11     | 0.98     | 0.81     | 0.75     | 0.63     | 0.55      |
| Tropical Latin America                 | 1758.15  | 1907.28  | 2092.03  | 2047.38  | 1994.29  | 1931.31  | 1855.38  | 1776.39  | 1727.96  | 1606.66   |
| Brazil                                 | 1715.03  | 1860.34  | 2040.58  | 1985.47  | 1922.77  | 1855.74  | 1780.86  | 1705.26  | 1659.99  | 1541.82   |
| Paraguay                               | 43.12    | 46.94    | 51.45    | 61.91    | 71.51    | 75.57    | 74.52    | 71.13    | 67.97    | 64.85     |
| Southeast Asia, East Asia, and Oceania | 19526.09 | 17861.85 | 17358.63 | 18211.87 | 18237.45 | 16442.91 | 14892.22 | 14049.06 | 13947.58 | 12354.37  |
| East Asia                              | 14330.48 | 12406.04 | 11586.4  | 12234.48 | 12106.46 | 10135.49 | 8535.7   | 7701.75  | 7572.25  | 6405.75   |
| China                                  | 13831.93 | 11939.75 | 11135.32 | 11766.59 | 11611.84 | 9577.57  | 7995.5   | 7267.4   | 7162.53  | 5994.84   |
| North Korea                            | 301.31   | 271.98   | 245.52   | 303.88   | 323.3    | 388.6    | 391.2    | 326.68   | 313.11   | 310.78    |
| Taiwan (Province of China)             | 197.24   | 194.31   | 205.56   | 164.01   | 171.31   | 169.32   | 148.99   | 107.67   | 96.62    | 100.14    |
| Southeast Asia                         | 5115.42  | 5365.7   | 5677.11  | 5875.2   | 6019.91  | 6183.9   | 6224.15  | 6020.28  | 6232.71  | 5796.15   |
| Cambodia                               | 131.79   | 139.22   | 130.37   | 135.73   | 145.48   | 158.21   | 165.7    | 188.07   | 198.45   | 200.42    |
| Indonesia                              | 2166.64  | 2196.14  | 2286.73  | 2285.26  | 2313.92  | 2451.13  | 2536.82  | 2530.13  | 2544.71  | 2258.71   |
| Laos                                   | 64.75    | 71.33    | 67.73    | 74.65    | 84.67    | 94.57    | 96.2     | 99.7     | 113.7    | 129.41    |
| Malaysia                               | 180.42   | 194.84   | 215.19   | 252.5    | 262.13   | 277.39   | 274.78   | 250.63   | 271.17   | 261.43    |
| Maldives                               | 1.57     | 1.61     | 1.79     | 2.1      | 2.39     | 2.53     | 2.57     | 3.05     | 3.6      | 3.04      |
| Mauritius                              | 10.83    | 11.8     | 12.04    | 9.11     | 11.28    | 11.07    | 10.03    | 8.67     | 6.94     | 6.78      |
| Myanmar                                | 388.76   | 441.71   | 486.64   | 530.56   | 548.56   | 549.55   | 557.39   | 555.84   | 522.59   | 468.91    |
| Philippines                            | 662.73   | 745.43   | 842.65   | 918.7    | 997.17   | 1063.24  | 1118.94  | 1162.03  | 1187.29  | 1247.26   |
| Sri Lanka                              | 183.63   | 190.23   | 218.12   | 195.48   | 186.36   | 178.54   | 178.63   | 188.73   | 180      | 138.96    |
| Seychelles                             | 0.98     | 0.92     | 0.97     | 0.96     | 0.8      | 0.82     | 0.73     | 0.86     | 0.9      | 0.8       |
| Thailand                               | 716.45   | 748.42   | 706.1    | 626.95   | 612.77   | 597.07   | 528.17   | 438.99   | 365.99   | 286.51    |
| Timor-Leste                            | 11.59    | 12.7     | 12.02    | 12.92    | 13.16    | 13.6     | 9.74     | 13.46    | 18.11    | 16.92     |
| Vietnam                                | 595.29   | 611.36   | 696.77   | 830.28   | 841.23   | 786.17   | 744.45   | 770.12   | 819.26   | 777       |
| Oceania                                | 80.19    | 90.1     | 95.12    | 102.19   | 111.08   | 123.52   | 132.37   | 137.03   | 142.63   | 152.47    |
| American Samoa                         | 0.56     | 0.62     | 0.66     | 0.75     | 0.89     | 0.88     | 0.9      | 0.85     | 0.8      | 0.78      |
| Federated States of Micronesia         | 1.59     | 1.49     | 1.81     | 1.92     | 1.83     | 1.69     | 1.44     | 1.13     | 1.01     | 1.01      |
| Fiji                                   | 9.38     | 10.51    | 10.66    | 10.45    | 8.81     | 7.91     | 7        | 6.37     | 5.88     | 5.12      |
| Guam                                   | 1.19     | 1.35     | 1.5      | 1.61     | 1.83     | 1.87     | 1.85     | 1.73     | 1.69     | 1.79      |
| Kiribati                               | 1.14     | 1.31     | 1.45     | 1.49     | 1.61     | 1.54     | 1.51     | 1.5      | 1.5      | 1.45      |
| Marshall Islands                       | 0.48     | 0.57     | 0.62     | 0.72     | 0.82     | 0.95     | 0.97     | 0.99     | 1.04     | 1.07      |
| Northern Mariana Islands               | 0.21     | 0.26     | 0.31     | 0.57     | 0.99     | 1.25     | 1.38     | 1.47     | 1.53     | 1.64      |
| Papua New Guinea                       | 55.68    | 63.16    | 66.03    | 71.76    | 80.6     | 92.56    | 101.46   | 106.14   | 111.56   | 122.31    |
| Samoa                                  | 2.93     | 2.94     | 3        | 2.99     | 2.91     | 2.91     | 2.88     | 2.94     | 2.96     | 2.81      |
| Solomon Islands                        | 3.48     | 4        | 4.75     | 5.29     | 5.85     | 6.86     | 7.81     | 8.41     | 8.88     | 8.76      |
| Tonga                                  | 1.55     | 1.54     | 1.6      | 1.64     | 1.72     | 1.62     | 1.53     | 1.6      | 1.54     | 1.33      |
| Vanuatu                                | 2        | 2.35     | 2.72     | 2.99     | 3.23     | 3.5      | 3.63     | 3.88     | 4.23     | 4.39      |
| North Africa and Middle East           | 4145.44  | 4592.45  | 5046.38  | 5436.69  | 5541.43  | 5546.88  | 5777.32  | 6161.97  | 6754.26  | 6475.75   |
| North Africa and Middle East           | 4145.44  | 4592.45  | 5046.38  | 5436.69  | 5541.43  | 5546.88  | 5777.32  | 6161.97  | 6754.26  | 6475.75   |
| Afghanistan                            | 274.37   | 303.14   | 312.06   | 269.01   | 269.19   | 344.73   | 387.42   | 464.44   | 484.37   | 596.9     |
| Algeria                                | 305.91   | 335.76   | 370.71   | 408.16   | 432.61   | 476.44   | 529.66   | 545.24   | 516.24   | 445.76    |
| Bahrain                                | 3.73     | 4.46     | 5.56     | 6.96     | 7.15     | 6.79     | 6.81     | 6.48     | 9.74     | 9.56      |
| Egypt                                  | 754.48   | 801.8    | 843.95   | 883.17   | 878.21   | 840.85   | 897.26   | 899.15   | 1136.92  | 1093.83   |
| Iran                                   | 686.78   | 722.72   | 893.7    | 1023.73  | 999.48   | 711.53   | 653.63   | 786.25   | 883.12   | 789.87    |
| Iraq                                   | 231.58   | 262.02   | 294.7    | 324.96   | 344.32   | 387.76   | 439.36   | 516.11   | 728.87   | 854.53    |
| Jordan                                 | 47.42    | 50.78    | 47.73    | 53.89    | 56.63    | 73.8     | 73.41    | 80.07    | 95.91    | 101.26    |
| Kuwait                                 | 19.28    | 23.72    | 26.95    | 28.02    | 21.96    | 23.14    | 21.37    | 24.44    | 30.13    | 27.38     |
| Lebanon                                | 48.04    | 50.57    | 46.05    | 41.27    | 35.44    | 33.59    | 29.09    | 27.29    | 28.41    | 35.16     |
| Libya                                  | 39.04    | 42.59    | 46.97    | 52.13    | 57.14    | 64.17    | 70.08    | 70.84    | 62.87    | 40.14     |
| Morocco                                | 283.63   | 303.15   | 338.53   | 371.95   | 385.5    | 362.74   | 325.51   | 291.02   | 263.49   | 228.15    |
| Palestine                              | 28.2     | 30.75    | 32.41    | 36.93    | 43.98    | 52.97    | 59.41    | 65.9     | 98.62    | 119.32    |
| Oman                                   | 20.19    | 23.68    | 28.61    | 34.21    | 37.66    | 41.52    | 47.49    | 47.03    | 44.24    | 46.47     |
| Qatar                                  | 2.05     | 2.52     | 3.85     | 4.94     | 5.69     | 5.5      | 5.49     | 7.21     | 11.04    | 13.33     |
| Saudi Arabia                           | 148.72   | 184.47   | 224.42   | 299.69   | 326.13   | 329.28   | 356.7    | 337.05   | 297.84   | 228.26    |
| Sudan                                  | 195.71   | 218.66   | 247.54   | 273.69   | 310.24   | 393.3    | 458.55   | 475.27   | 471.49   | 446.39    |
| Syria                                  | 140.62   | 164.87   | 186.56   | 209.67   | 228.85   | 247.83   | 258.2    | 250.42   | 260.91   | 152.08    |
| Tunisia                                | 92.05    | 101.02   | 112.31   | 117.72   | 112.13   | 97.9     | 85.32    | 87.63    | 95.51    | 77.86     |
| Turkey                                 | 660.46   | 736.63   | 772.56   | 742.78   | 683.07   | 685.67   | 671.11   | 650.52   | 657.38   | 608.7     |
| United Arab Emirates                   | 5.84     | 10.28    | 20.02    | 28.13    | 29.11    | 35.23    | 39       | 53.86    | 88.05    | 78.41     |
| Yemen                                  | 157.32   | 168.85   | 191.18   | 225.67   | 276.94   | 332.15   | 362.47   | 385.75   | 489.12   | 482.38    |
| South Asia                             | 13387.67 | 14506.07 | 15884.67 | 17085    | 17704.33 | 17863.98 | 18002.85 | 18104.39 | 17912.62 | 15777.31  |
| South Asia                             | 13387.67 | 14506.07 | 15884.67 | 17085    | 17704.33 | 17863.98 | 18002.85 | 18104.39 | 17912.62 | 15777.31  |
| Bangladesh                             | 1358.72  | 1334.23  | 1454.64  | 1640.89  | 1752.32  | 1691.91  | 1656.36  | 1677.48  | 1619.69  | 1438.01   |
| Bhutan                                 | 7.1      | 7.98     | 8.67     | 9.32     | 10.43    | 9.58     | 10.16    | 10.18    | 9.3      | 7.81      |
| India                                  | 10429.07 | 11389.3  | 12343.67 | 12968.48 | 13389.97 | 13619.19 | 13876.67 | 13919.64 | 13358.81 | 11452.73  |
| Nepal                                  | 255.9    | 281.85   | 309.96   | 341.02   | 373.07   | 388.5    | 402.07   | 367.31   | 393.45   | 427.42    |
| Pakistan                               | 1336.88  | 1492.69  | 1767.73  | 2125.29  | 2178.54  | 2154.8   | 2057.59  | 2129.78  | 2351.37  | 2451.34   |
| Sub-Saharan Africa                     | 6637.09  | 7373.19  | 8238.5   | 9139.73  | 10201.52 | 11279.11 | 12602.86 | 14304.64 | 16121.56 | 18017.28  |
| Southern Sub-Saharan Africa            | 478.54   | 536.03   | 599.5    | 676.42   | 740.1    | 764.2    | 800.18   | 847.68   | 892.38   | 938.74    |
| Botswana                               | 13.22    | 15       | 17.45    | 19.43    | 20.54    | 22.2     | 23.31    | 24.73    | 26.97    | 27.67     |
| Lesotho                                | 19.48    | 20.95    | 22.53    | 23.87    | 23.98    | 25.64    | 26.63    | 26.83    | 27.98    | 28.33     |
| Namibia                                | 15.64    | 17.48    | 18.6     | 20.85    | 27.2     | 29.77    | 31.13    | 30.15    | 32.66    | 36.57     |
| South Africa                           | 321.39   | 358.01   | 398.5    | 440.4    | 470.21   | 482.23   | 504.39   | 531.99   | 527.67   | 544.1     |
| Swaziland                              | 9.04     | 10.03    | 11.26    | 12.89    | 15.37    | 15.61    | 17.13    | 18.39    | 22.32    | 22.5      |
| Zimbabwe                               | 99.77    | 114.55   | 131.16   | 158.97   | 182.79   | 188.74   | 197.58   | 215.6    | 254.78   | 279.57    |
| Western Sub-Saharan Africa             | 2801.3   | 3057.21  | 3362.94  | 3699.2   | 4149.98  | 4638.44  | 5258.36  | 6031.97  | 6860.57  | 7546.9    |
| Benin                                  | 69.02    | 75.56    | 84.84    | 95.72    | 106.96   | 123.99   | 140.89   | 166.74   | 190.17   | 223.84    |
| Burkina Faso                           | 142.11   | 152.4    | 165.19   | 185.05   | 209.99   | 231.51   | 265.31   | 308.73   | 346.43   | 376.09    |
| Cameroon                               | 158.07   | 170.21   | 187.94   | 213.41   | 242.5    | 268.87   | 300.04   | 343.18   | 396.72   | 445.18    |
| Cape Verde                             | 4.56     | 4.45     | 4.97     | 6.05     | 6.27     | 6.71     | 6.98     | 7.58     | 7.86     | 7.68      |
| Chad                                   | 88.12    | 98.77    | 107.14   | 117.89   | 135.1    | 155.14   | 181.81   | 219.57   | 261.92   | 323.49    |
| Cote d'Ivoire                          | 118.49   | 141.86   | 173.48   | 216.39   | 239.79   | 260.88   | 297.97   | 325.42   | 360.72   | 417.73    |
| The Gambia                             | 12.79    | 14.44    | 16.5     | 18.37    | 22.68    | 26.25    | 29.97    | 33.19    | 36.48    | 40.94     |
| Ghana                                  | 196.84   | 212.05   | 225.5    | 262.97   | 286.16   | 295.13   | 313.93   | 372.71   | 453.44   | 478.9     |
| Guinea                                 | 91.74    | 94.76    | 96.99    | 106.64   | 123.06   | 155.65   | 171.32   | 187.05   | 208.71   | 236.73    |
| Guinea-Bissau                          | 15.37    | 17.12    | 18.5     | 19.72    | 21.19    | 23.13    | 25.64    | 28.68    | 31.77    | 35.13     |
| Liberia                                | 36.33    | 40.28    | 45.38    | 51.04    | 48.04    | 47       | 63.76    | 66.61    | 74.39    | 81.33     |
| Mali                                   | 150.25   | 162.55   | 175.49   | 190.68   | 200.03   | 228.18   | 262.21   | 299.72   | 336.19   | 378.78    |
| Mauritania                             | 22.22    | 24.76    | 27.89    | 31.38    | 34.89    | 38.76    | 43.6     | 49.55    | 53.58    | 57.16     |
| Niger                                  | 125.53   | 139.68   | 157.61   | 177.97   | 202.91   | 237.36   | 275.92   | 317.93   | 370.29   | 455.83    |
| Nigeria                                | 1368.09  | 1485.08  | 1632.27  | 1733.09  | 1963.63  | 2214.48  | 2526.81  | 2885.46  | 3255.25  | 3453.26   |
| Sao Tome and Principe                  | 1.52     | 1.7      | 1.93     | 2.11     | 2.27     | 2.5      | 2.76     | 2.99     | 3.28     | 3.58      |
| Senegal                                | 95.08    | 107.72   | 117.43   | 132      | 150.29   | 166.82   | 181.24   | 217.98   | 252.74   | 285.36    |
| Sierra Leone                           | 58.07    | 62.23    | 66.99    | 71.74    | 78.04    | 74.59    | 77.71    | 97.42    | 109.8    | 122.59    |
| Togo                                   | 47.1     | 51.61    | 56.9     | 66.96    | 76.15    | 81.48    | 90.47    | 101.46   | 110.84   | 123.29    |
| Eastern Sub-Saharan Africa             | 2614.46  | 2964.17  | 3363.92  | 3747.59  | 4170.1   | 4548.8   | 5032.34  | 5663.78  | 6323.11  | 7076.27</ |

Appendix Table 15B. Live births (in thousands) by location, males, 1970, 1975, 1980, 1985, 1990, 1995, 2000, 2005, 2010, 2016

| Country                          | 1970   | 1975   | 1980   | 1985    | 1990    | 1995    | 2000    | 2005    | 2010    | 2016    |
|----------------------------------|--------|--------|--------|---------|---------|---------|---------|---------|---------|---------|
| Malawi                           | 133.15 | 145.97 | 161.66 | 179.44  | 233.51  | 227.56  | 250.05  | 274.56  | 319.06  | 365.25  |
| Mozambique                       | 218.07 | 245.8  | 282.52 | 291.14  | 275.65  | 338.41  | 389.75  | 452.2   | 517.69  | 560.36  |
| Rwanda                           | 95.47  | 113.98 | 136.9  | 156.31  | 164.52  | 136.52  | 163.97  | 189.7   | 197.82  | 202.29  |
| Somalia                          | 65.54  | 73.74  | 114.63 | 110.99  | 111.98  | 106.62  | 115.22  | 125.29  | 136.22  | 152.5   |
| South Sudan                      | 111.7  | 121.27 | 135.41 | 155.47  | 161.5   | 150.04  | 180.46  | 217.61  | 271.52  | 347.26  |
| Tanzania                         | 381.06 | 434.08 | 489.34 | 545.79  | 605.6   | 687.94  | 730.01  | 817.03  | 920.64  | 1003.32 |
| Uganda                           | 267.05 | 302.17 | 344.28 | 390.98  | 449.08  | 504.91  | 576.09  | 664.71  | 756.71  | 856.77  |
| Zambia                           | 115.98 | 132.84 | 150.37 | 174.06  | 191.45  | 203.49  | 226.44  | 252.17  | 283.81  | 324.15  |
| Central Sub-Saharan Africa       | 742.79 | 815.78 | 912.14 | 1016.52 | 1141.35 | 1327.67 | 1511.98 | 1761.2  | 2045.5  | 2455.37 |
| Angola                           | 152.94 | 173.44 | 201.33 | 237.71  | 267.96  | 312.42  | 357.29  | 416.24  | 484.88  | 562.6   |
| Central African Republic         | 36.5   | 39.1   | 43.43  | 50.1    | 54.13   | 61.32   | 67.45   | 71.58   | 79.5    | 90.6    |
| Congo                            | 29.17  | 32.88  | 36.79  | 41.65   | 47.31   | 53.72   | 61.14   | 66.97   | 77.27   | 81.93   |
| Democratic Republic of the Congo | 505.36 | 553.92 | 613.83 | 665.84  | 747.88  | 873.97  | 997.75  | 1175.04 | 1369.24 | 1681.75 |
| Equatorial Guinea                | 6.31   | 3.98   | 3.79   | 7.11    | 8.27    | 8.56    | 8.36    | 8.85    | 9.92    | 11.5    |
| Gabon                            | 12.51  | 12.47  | 12.97  | 14.11   | 15.81   | 17.68   | 20      | 22.52   | 24.69   | 26.99   |

| Appendix Table 15C. Live births (in thousands) by location, females, 1970, 1975, 1980, 1985, 1990, 1995, 2000, 2005, 2010, 2016 |          |         |          |          |          |          |         |          |          |         |
|---------------------------------------------------------------------------------------------------------------------------------|----------|---------|----------|----------|----------|----------|---------|----------|----------|---------|
| Country                                                                                                                         | 1970     | 1975    | 1980     | 1985     | 1990     | 1995     | 2000    | 2005     | 2010     | 2016    |
| Global                                                                                                                          | 55450.35 | 55980.2 | 58603.31 | 61660.62 | 62722.52 | 60962.28 | 60619.1 | 61950.34 | 64312.58 | 62295   |
| High-income                                                                                                                     | 6702.26  | 5974.26 | 6054.12  | 5820.2   | 6017.15  | 5712.71  | 5731.45 | 5769.18  | 5771.49  | 5652.27 |
| High-income North America                                                                                                       | 1929.53  | 1679.7  | 1934.73  | 2013.48  | 2219.3   | 2101.03  | 2137.22 | 2214.66  | 2114.87  | 2171.88 |
| Canada                                                                                                                          | 173.54   | 171.25  | 178.91   | 183.41   | 196.73   | 179.46   | 160.98  | 168.67   | 181.74   | 195.87  |
| Greenland                                                                                                                       | 0.74     | 0.49    | 0.52     | 0.5      | 0.57     | 0.5      | 0.43    | 0.37     | 0.34     | 0.35    |
| United States                                                                                                                   | 1755.25  | 1507.95 | 1755.31  | 1829.57  | 2022     | 1921.07  | 1975.81 | 2045.62  | 1932.8   | 1975.66 |
| Australasia                                                                                                                     | 159.73   | 137.24  | 135.45   | 143.61   | 154.39   | 151.1    | 147.35  | 147.35   | 172.95   | 174     |
| Australia                                                                                                                       | 129.13   | 110.5   | 110.97   | 118.26   | 125.76   | 123.28   | 119.73  | 125.94   | 142.79   | 146.22  |
| New Zealand                                                                                                                     | 30.6     | 26.73   | 24.48    | 25.35    | 28.63    | 27.82    | 27.62   | 28.43    | 30.17    | 27.78   |
| High-income Asia Pacific                                                                                                        | 1446.25  | 1326.86 | 1205.55  | 1018.37  | 944.23   | 921.69   | 860.91  | 756.53   | 766.42   | 667.91  |
| Brunei                                                                                                                          | 1.79     | 2.21    | 2.81     | 3.04     | 3.45     | 3.74     | 3.93    | 3.48     | 3.25     | 3.18    |
| Japan                                                                                                                           | 961.9    | 891.52  | 762.76   | 695.69   | 597.21   | 578.77   | 571.75  | 529.09   | 523.11   | 455.19  |
| Singapore                                                                                                                       | 22.23    | 19.1    | 19.83    | 20.32    | 22.97    | 22.97    | 20.48   | 17.54    | 16.99    | 16.6    |
| South Korea                                                                                                                     | 460.33   | 414.04  | 420.15   | 299.32   | 320.38   | 316.22   | 264.76  | 206.42   | 223.07   | 192.93  |
| Western Europe                                                                                                                  | 2780.92  | 2404.21 | 2330.52  | 2196.59  | 2229.28  | 2090.25  | 2099.28 | 2157.13  | 2214.17  | 2141.24 |
| Andorra                                                                                                                         | 0.08     | 0.11    | 0.14     | 0.2      | 0.23     | 0.29     | 0.29    | 0.3      | 0.31     | 0.29    |
| Austria                                                                                                                         | 53.56    | 43.99   | 44.54    | 41.91    | 44.53    | 43.22    | 37.67   | 38.26    | 38.16    | 40.11   |
| Belgium                                                                                                                         | 68.3     | 57.03   | 59.61    | 56.04    | 60.6     | 56.78    | 56.81   | 59.21    | 62.24    | 63.33   |
| Cyprus                                                                                                                          | 6.55     | 5.18    | 5.93     | 5.88     | 5.84     | 4.92     | 3.94    | 4.13     | 4.79     | 5.06    |
| Denmark                                                                                                                         | 35.05    | 33.32   | 27.09    | 26.4     | 30.91    | 33.27    | 32.47   | 31.7     | 30.04    | 29.05   |
| Finland                                                                                                                         | 30.12    | 32.24   | 30.93    | 30.13    | 32.24    | 30.47    | 27.68   | 28.58    | 29.52    | 29.09   |
| France                                                                                                                          | 416.52   | 351.81  | 389.86   | 375.86   | 370.57   | 356.46   | 377.49  | 384.32   | 389.11   | 386.18  |
| Germany                                                                                                                         | 498.25   | 384.68  | 412.7    | 399.75   | 414.97   | 379.13   | 362.23  | 332.63   | 322.39   | 338.86  |
| Greece                                                                                                                          | 68.44    | 68.6    | 68.46    | 54.57    | 49.7     | 50.34    | 49.81   | 53.47    | 54.65    | 44.02   |
| Iceland                                                                                                                         | 1.97     | 2.09    | 2.14     | 1.84     | 2.25     | 2.11     | 2.05    | 2.11     | 2.09     | 2.09    |
| Ireland                                                                                                                         | 31.95    | 32.21   | 35.15    | 29.89    | 25.86    | 23.97    | 26.98   | 30.29    | 36.56    | 30.77   |
| Israel                                                                                                                          | 36.99    | 43.07   | 49.33    | 51.24    | 50.17    | 55.74    | 64.58   | 71.41    | 79.6     | 83.63   |
| Italy                                                                                                                           | 441.47   | 397.76  | 310.08   | 278.4    | 277.13   | 254.77   | 260.87  | 269.02   | 266.65   | 228.31  |
| Luxembourg                                                                                                                      | 2.13     | 1.89    | 2.08     | 2.03     | 2.41     | 2.68     | 2.73    | 2.64     | 2.78     | 3.18    |
| Malta                                                                                                                           | 2.65     | 2.91    | 2.77     | 2.77     | 2.83     | 2.43     | 1.95    | 1.76     | 1.89     | 1.83    |
| Netherlands                                                                                                                     | 111.52   | 84.95   | 87.35    | 87.78    | 95.92    | 91.77    | 99.42   | 91.67    | 89.31    | 86.45   |
| Norway                                                                                                                          | 30.79    | 26.15   | 24.57    | 25.12    | 29.49    | 29.44    | 28.35   | 28.07    | 29.49    | 30.23   |
| Portugal                                                                                                                        | 88.04    | 86.39   | 74.44    | 62.28    | 56.52    | 52.57    | 56.01   | 51.63    | 48.37    | 39.69   |
| Spain                                                                                                                           | 322.78   | 326.04  | 264.63   | 214.59   | 190.76   | 175.23   | 194.66  | 227.22   | 233.47   | 204.14  |
| Sweden                                                                                                                          | 53.81    | 48.94   | 46.69    | 48.79    | 60.29    | 48.18    | 44.24   | 50.59    | 55.99    | 57.43   |
| Switzerland                                                                                                                     | 47.23    | 37.38   | 35.88    | 36.54    | 40.72    | 39.96    | 36.82   | 35.85    | 39.1     | 41.69   |
| United Kingdom                                                                                                                  | 432.69   | 337.47  | 356.12   | 364.6    | 385.34   | 356.53   | 329.24  | 362.28   | 397.43   | 385.81  |
| England                                                                                                                         | 352.48   | 274.39  | 290.7    | 301.44   | 323.17   | 299.13   | 277.83  | 308.02   | 338.28   | 329.39  |
| East Midlands                                                                                                                   | 27.77    | 22.47   | 23.9     | 23.62    | 25.81    | 23.94    | 22.19   | 24.63    | 27.25    | 27.07   |
| East of England                                                                                                                 | 32.87    | 26.73   | 29.22    | 30.9     | 32.68    | 31.04    | 28.93   | 32.53    | 35.63    | 37.04   |
| Greater London                                                                                                                  | 56.37    | 43.95   | 46.03    | 49.46    | 55.22    | 51.77    | 51.65   | 57.97    | 66.73    | 64.45   |
| North East England                                                                                                              | 21.47    | 15.88   | 16.52    | 16.24    | 16.6     | 15.01    | 13.11   | 14.09    | 14.64    | 14.14   |
| North West England                                                                                                              | 57.43    | 42.51   | 44.22    | 45.22    | 47.23    | 41.54    | 37.44   | 40.75    | 44.12    | 41.74   |
| South East England                                                                                                              | 47.99    | 39.02   | 42.58    | 45.63    | 49.12    | 45.96    | 42.42   | 47.23    | 52.51    | 49.31   |
| South West England                                                                                                              | 27.74    | 22.68   | 24.48    | 25.55    | 27.69    | 26.62    | 23.97   | 26.66    | 29.72    | 29.18   |
| West Midlands                                                                                                                   | 42.93    | 32.23   | 33.28    | 33.9     | 35.76    | 32.78    | 30.28   | 33.28    | 35.7     | 34.11   |
| Yorkshire and the Humber                                                                                                        | 37.95    | 28.92   | 30.48    | 30.93    | 33.11    | 30.47    | 27.84   | 30.89    | 31.98    | 32.33   |
| Northern Ireland                                                                                                                | 14.78    | 13.7    | 14.19    | 13.83    | 12.73    | 11.55    | 10.54   | 11.27    | 12.48    | 10.77   |
| Scotland                                                                                                                        | 42.56    | 32.01   | 33.45    | 31.97    | 31.87    | 29.2     | 25.78   | 26.69    | 29       | 29.1    |
| Wales                                                                                                                           | 22.94    | 17.38   | 17.78    | 17.36    | 17.57    | 16.64    | 15.08   | 16.29    | 17.66    | 16.61   |
| Southern Latin America                                                                                                          | 385.83   | 426.25  | 447.87   | 448.16   | 469.95   | 448.64   | 486.69  | 486.49   | 503.07   | 497.23  |
| Argentina                                                                                                                       | 237.7    | 285.68  | 308.12   | 301.42   | 304.17   | 286.93   | 337.08  | 346.8    | 359.91   | 355.78  |
| Chile                                                                                                                           | 120.4    | 114.35  | 116.97   | 123.44   | 141.05   | 134.06   | 123.41  | 116.16   | 120.25   | 117.83  |
| Uruguay                                                                                                                         | 27.72    | 26.23   | 22.78    | 23.3     | 24.73    | 27.65    | 26.2    | 23.53    | 22.91    | 23.63   |
| Central Europe, Eastern Europe, and Central Asia                                                                                | 3070.15  | 3313.25 | 3409.5   | 3636.15  | 3170.43  | 2427.36  | 2177.92 | 2362.43  | 2700.87  | 2744.84 |
| Eastern Europe                                                                                                                  | 1457.11  | 1551.93 | 1600.11  | 1740.5   | 1404.87  | 996.77   | 907.84  | 1021.93  | 1220.88  | 1258.57 |
| Belarus                                                                                                                         | 71.97    | 71.81   | 76.09    | 81.51    | 68.42    | 49.58    | 45.24   | 46.24    | 53.7     | 55.99   |
| Estonia                                                                                                                         | 10.88    | 10.4    | 10.9     | 11.57    | 10.21    | 6.54     | 6.31    | 7.08     | 7.33     | 6.64    |
| Latvia                                                                                                                          | 16.88    | 16.69   | 17.37    | 20.09    | 17.85    | 10.15    | 9.68    | 10.75    | 9.53     | 10.9    |
| Lithuania                                                                                                                       | 27.41    | 25.35   | 24.8     | 28.46    | 27.49    | 19.33    | 16.15   | 14.47    | 15.46    | 14.33   |
| Moldova                                                                                                                         | 36.73    | 39.81   | 41.9     | 45       | 37.86    | 27.17    | 20.66   | 22.23    | 22.23    | 21.8    |
| Russia                                                                                                                          | 938.46   | 1026.98 | 1064.68  | 1175.7   | 928.33   | 649.03   | 622.42  | 707.15   | 867.4    | 916.39  |
| Ukraine                                                                                                                         | 355.08   | 360.89  | 364.37   | 378.17   | 314.71   | 234.97   | 187.38  | 214.01   | 245.24   | 232.53  |
| Central Europe                                                                                                                  | 927.07   | 1040.36 | 997.94   | 950.94   | 814.49   | 646.45   | 571.05  | 564.66   | 565.95   | 529.94  |
| Albania                                                                                                                         | 27.6     | 30.35   | 34.43    | 38.95    | 41.2     | 33.1     | 24.3    | 18.46    | 16.76    | 18.99   |
| Bosnia and Herzegovina                                                                                                          | 40.68    | 37.13   | 35.09    | 38.42    | 34.67    | 24.35    | 16.23   | 16.02    | 16.75    | 15.35   |
| Bulgaria                                                                                                                        | 65.96    | 70.29   | 61.38    | 58.97    | 49.4     | 34.77    | 34.51   | 34.32    | 34.95    | 31.09   |
| Croatia                                                                                                                         | 31.65    | 31.82   | 32.3     | 30.84    | 26.6     | 24.46    | 19.8    | 19.75    | 19.96    | 18.13   |
| Czech Republic                                                                                                                  | 71.81    | 91.21   | 73.47    | 65.8     | 63.71    | 44.39    | 43.3    | 49.93    | 54.58    | 51.55   |
| Hungary                                                                                                                         | 73.09    | 91.56   | 71.76    | 63.19    | 61.78    | 52.44    | 46.83   | 47.55    | 43.59    | 43.13   |
| Macedonia                                                                                                                       | 20.2     | 19.79   | 19.81    | 18.51    | 17.03    | 15.58    | 13.55   | 11.12    | 11.5     | 10.53   |
| Montenegro                                                                                                                      | 5.15     | 5.12    | 5.12     | 5.22     | 4.67     | 4.34     | 3.93    | 3.66     | 3.67     | 3.48    |
| Poland                                                                                                                          | 261.45   | 314.76  | 332.42   | 320.61   | 257.7    | 198.53   | 180.25  | 180.05   | 195.27   | 177.93  |
| Romania                                                                                                                         | 204.71   | 209.51  | 196.99   | 181.6    | 140.68   | 112.73   | 104.89  | 103.26   | 85.39    | 84.01   |
| Serbia                                                                                                                          | 71.79    | 76.91   | 74.84    | 73.08    | 67.24    | 63.08    | 49.09   | 45.5     | 41.42    | 39.19   |
| Slovakia                                                                                                                        | 39.32    | 47.35   | 45.76    | 43.44    | 39       | 29.46    | 25.69   | 25.98    | 31.21    | 26.84   |
| Slovenia                                                                                                                        | 13.67    | 14.57   | 14.55    | 12.31    | 10.82    | 9.21     | 8.7     | 9.06     | 10.88    | 9.72    |
| Central Asia                                                                                                                    | 685.97   | 721.06  | 811.45   | 944.71   | 951.07   | 784.13   | 699.03  | 775.84   | 914.04   | 956.33  |
| Armenia                                                                                                                         | 29.94    | 33.89   | 41.42    | 43.4     | 37.73    | 21.98    | 17.06   | 18       | 19.51    | 21.11   |
| Azerbaijan                                                                                                                      | 71.26    | 70.29   | 79.27    | 89.78    | 90.88    | 72.56    | 57.89   | 72.87    | 92.79    | 88.15   |
| Georgia                                                                                                                         | 43.59    | 45.54   | 45.62    | 47.14    | 43.17    | 28.08    | 24.46   | 27.99    | 32.24    | 30.96   |
| Kazakhstan                                                                                                                      | 187.76   | 188.27  | 191.94   | 203.19   | 181.51   | 136.28   | 116.46  | 147.83   | 184.65   | 191.14  |
| Kyrgyzstan                                                                                                                      | 47.44    | 47.62   | 52.88    | 62.71    | 62.56    | 53.68    | 48.71   | 69.62    | 64.29    | 74.29   |
| Mongolia                                                                                                                        | 25.79    | 27.18   | 30.94    | 34.92    | 33.91    | 26.22    | 23.74   | 25.61    | 33.45    | 38.39   |
| Tajikistan                                                                                                                      | 54.33    | 58.84   | 69.58    | 87.97    | 96.79    | 84.12    | 77.12   | 82.44    | 100.75   | 122.65  |
| Turkmenistan                                                                                                                    | 33.75    | 37.19   | 43.68    | 54.52    | 61.38    | 56.59    | 49.21   | 50.49    | 55.82    | 59.11   |
| Uzbekistan                                                                                                                      | 192.11   | 212.24  | 256.11   | 321.06   | 343.15   | 304.63   | 284.37  | 297.22   | 325.22   | 330.54  |
| Latin America and Caribbean                                                                                                     | 4359.47  | 4731.04 | 5131.32  | 5277.73  | 5407.93  | 5381.65  | 5262.62 | 5098.14  | 5036.28  | 4787.87 |
| Central Latin America                                                                                                           | 1832.21  | 2026.02 | 2207.35  | 2343.96  | 2500.09  | 2542.73  | 2507.06 | 2425.76  | 2361.88  | 2195.66 |
| Colombia                                                                                                                        | 333.42   | 359.31  | 388.08   | 421.22   | 437.9    | 432.32   | 411.94  | 404.38   | 387.63   | 330.16  |
| Costa Rica                                                                                                                      | 28.46    | 28.92   | 34.16    | 39.59    | 38.9     | 37.26    | 36.43   | 34.52    | 32.87    | 28.27   |
| El Salvador                                                                                                                     | 71.18    | 79.1    | 78.22    | 73.49    | 75.32    | 75.58    | 70.82   | 64.2     | 57.45    | 50.25   |
| Guatemala                                                                                                                       | 119.7    | 130.55  | 139.3    | 153.98   | 171.96   | 189.09   | 199.94  | 201.75   | 196.39   | 201.74  |
| Honduras                                                                                                                        | 61.15    | 68.12   | 75.26    | 83.31    | 87.8     | 87.26    | 85.65   | 86.3     | 92.11    | 95.62   |
| Mexico                                                                                                                          | 963.65   | 1075.93 | 1178.51  | 1245.18  | 1310.68  | 1351.88  | 1319.29 |          |          |         |

Appendix Table 15C. Live births (in thousands) by location, females, 1970, 1975, 1980, 1985, 1990, 1995, 2000, 2005, 2010, 2016

| Country                            | 1970     | 1975     | 1980     | 1985     | 1990     | 1995     | 2000     | 2005     | 2010     | 2016     |
|------------------------------------|----------|----------|----------|----------|----------|----------|----------|----------|----------|----------|
| Grenada                            | 1.39     | 1.38     | 1.3      | 1.61     | 1.25     | 1.16     | 1.02     | 0.93     | 0.89     | 0.83     |
| Guyana                             | 10.74    | 11.54    | 11.87    | 10.68    | 11       | 10.56    | 9.35     | 7.83     | 6.58     | 6.65     |
| Haiti                              | 100.44   | 107.61   | 116.62   | 126.67   | 129      | 132.13   | 139.79   | 156.51   | 156.51   | 159.73   |
| Jamaica                            | 33.9     | 31.93    | 32.47    | 33.45    | 33.99    | 33.11    | 31.18    | 28.35    | 27.47    | 27.44    |
| Puerto Rico                        | 34.89    | 38.08    | 34.96    | 30.71    | 30.15    | 27.39    | 24.66    | 21.97    | 20.98    | 20.2     |
| Saint Lucia                        | 2.33     | 2.32     | 2.22     | 2.15     | 1.93     | 1.64     | 1.41     | 1.22     | 1.03     | 0.93     |
| Saint Vincent and the Grenadines   | 1.94     | 1.87     | 1.81     | 1.68     | 1.45     | 1.28     | 1.08     | 0.97     | 0.94     | 0.87     |
| Suriname                           | 6.38     | 5.31     | 5.35     | 5.71     | 5.65     | 5.84     | 5.76     | 5.46     | 4.98     | 4.48     |
| Trinidad and Tobago                | 13.72    | 13.8     | 16.46    | 16.95    | 11.79    | 10.23    | 9.28     | 9.26     | 8.2      | 6.22     |
| Virgin Islands, U.S.               | 1.21     | 1.25     | 1.18     | 1.12     | 1.05     | 0.92     | 0.76     | 0.71     | 0.59     | 0.52     |
| Tropical Latin America             | 1674.43  | 1816.46  | 1992.41  | 1949.88  | 1899.32  | 1839.34  | 1767.02  | 1691.8   | 1645.68  | 1530.15  |
| Brazil                             | 1633.36  | 1771.75  | 1943.41  | 1890.92  | 1831.21  | 1767.37  | 1696.05  | 1624.06  | 1580.95  | 1468.4   |
| Paraguay                           | 41.07    | 44.71    | 49       | 58.96    | 68.11    | 71.97    | 70.97    | 67.75    | 64.73    | 61.76    |
| South Asia, East Asia, and Oceania | 18344.1  | 16795.78 | 16328.5  | 16931.37 | 16661.26 | 14919.82 | 13437.63 | 12620.96 | 12577.64 | 11225.36 |
| East Asia                          | 13399.4  | 11601.01 | 10833.89 | 11239.03 | 10832.54 | 8930.33  | 7403.5   | 6623.64  | 6563.75  | 5602.27  |
| China                              | 12927.16 | 11158.77 | 10406.99 | 10795.84 | 10369.3  | 8403.32  | 6894.8   | 6213.77  | 6176.87  | 5214.82  |
| North Korea                        | 286.96   | 259.03   | 233.83   | 289.41   | 307.91   | 370.1    | 372.58   | 311.13   | 298.2    | 295.98   |
| Taiwan (Province of China)         | 185.28   | 183.21   | 193.07   | 153.77   | 155.33   | 156.91   | 136.13   | 98.74    | 88.67    | 91.47    |
| Southeast Asia                     | 4870.09  | 5110.96  | 5406.17  | 5597.35  | 5725.51  | 5874.71  | 5911.22  | 5870.09  | 5881.47  | 5481.49  |
| Cambodia                           | 126.6    | 133.86   | 124.28   | 131.14   | 140.43   | 152.57   | 160.25   | 176.75   | 189.18   | 191.06   |
| Indonesia                          | 2063.47  | 2091.56  | 2177.84  | 2176.44  | 2203.73  | 2334.41  | 2409.62  | 2409.64  | 2423.54  | 2151.15  |
| Laos                               | 61.66    | 67.93    | 64.5     | 71.1     | 80.64    | 90.07    | 91.62    | 94.96    | 108.28   | 123.25   |
| Malaysia                           | 170.21   | 183.81   | 203.01   | 238.21   | 247.29   | 261.69   | 259.23   | 236.44   | 255.82   | 246.63   |
| Maldives                           | 1.49     | 1.52     | 1.69     | 1.99     | 2.21     | 2.38     | 2.43     | 2.87     | 3.26     | 2.8      |
| Mauritius                          | 10.39    | 11.33    | 11.55    | 8.74     | 10.82    | 10.62    | 9.62     | 8.32     | 6.66     | 6.51     |
| Myanmar                            | 377.43   | 428.84   | 472.47   | 515.11   | 532.58   | 533.55   | 541.16   | 539.65   | 507.37   | 455.26   |
| Philippines                        | 625.22   | 703.23   | 794.95   | 866.69   | 940.72   | 1003.06  | 1055.6   | 1096.25  | 1120.08  | 1176.66  |
| Sri Lanka                          | 176.91   | 182.91   | 208.73   | 186.88   | 179.36   | 171.02   | 170.94   | 180.77   | 173.08   | 133.23   |
| Seychelles                         | 0.93     | 0.87     | 0.92     | 0.91     | 0.76     | 0.77     | 0.69     | 0.81     | 0.84     | 0.76     |
| Thailand                           | 677.82   | 710.75   | 671.19   | 597.1    | 580.82   | 562.75   | 497.34   | 412.58   | 344.63   | 269.78   |
| Timor-Leste                        | 11.03    | 12.1     | 11.44    | 12.31    | 12.53    | 12.95    | 9.28     | 12.82    | 17.25    | 16.11    |
| Vietnam                            | 566.94   | 582.25   | 663.59   | 790.74   | 793.61   | 738.88   | 697.05   | 698.21   | 731.48   | 708.29   |
| Oceania                            | 74.61    | 83.81    | 88.44    | 95       | 103.21   | 114.78   | 122.9    | 127.23   | 132.42   | 141.6    |
| American Samoa                     | 0.52     | 0.58     | 0.61     | 0.7      | 0.83     | 0.85     | 0.81     | 0.79     | 0.74     | 0.72     |
| Federated States of Micronesia     | 1.48     | 1.39     | 1.69     | 1.8      | 1.71     | 1.58     | 1.35     | 1.06     | 0.95     | 0.95     |
| Fiji                               | 8.85     | 9.92     | 10.06    | 9.86     | 8.31     | 7.46     | 6.61     | 6.01     | 5.55     | 4.83     |
| Guam                               | 1.12     | 1.28     | 1.41     | 1.52     | 1.73     | 1.77     | 1.75     | 1.64     | 1.6      | 1.69     |
| Kiribati                           | 1.09     | 1.25     | 1.36     | 1.39     | 1.5      | 1.44     | 1.41     | 1.41     | 1.41     | 1.37     |
| Marshall Islands                   | 0.46     | 0.54     | 0.59     | 0.68     | 0.78     | 0.9      | 0.92     | 0.95     | 0.99     | 1.02     |
| Northern Mariana Islands           | 0.22     | 0.26     | 0.29     | 0.22     | 0.91     | 1.16     | 1.28     | 1.37     | 1.43     | 1.54     |
| Papua New Guinea                   | 51.55    | 58.48    | 61.14    | 66.44    | 74.63    | 85.7     | 93.94    | 98.28    | 103.3    | 113.25   |
| Samoa                              | 2.72     | 2.72     | 2.78     | 2.77     | 2.69     | 2.69     | 2.67     | 2.73     | 2.74     | 2.6      |
| Solomon Islands                    | 3.25     | 3.74     | 4.44     | 4.94     | 5.47     | 6.41     | 7.3      | 7.86     | 8.3      | 8.23     |
| Tonga                              | 1.48     | 1.47     | 1.52     | 1.56     | 1.64     | 1.55     | 1.46     | 1.52     | 1.47     | 1.27     |
| Vanuatu                            | 1.87     | 2.2      | 2.54     | 2.8      | 3.01     | 3.27     | 3.4      | 3.63     | 3.96     | 4.12     |
| North Africa and Middle East       | 3940.23  | 4365.73  | 4798.3   | 5169.94  | 5268.4   | 5278.94  | 5491.03  | 5851.22  | 6407.96  | 6145.54  |
| North Africa and Middle East       | 3940.23  | 4365.73  | 4798.3   | 5169.94  | 5268.4   | 5278.94  | 5491.03  | 5851.22  | 6407.96  | 6145.54  |
| Afghanistan                        | 258.84   | 285.98   | 294.4    | 253.78   | 253.95   | 325.22   | 365.49   | 438.15   | 456.95   | 563.11   |
| Algeria                            | 291.34   | 319.77   | 353.05   | 388.72   | 412.01   | 453.75   | 504.44   | 519.28   | 491.66   | 424.54   |
| Bahrain                            | 3.56     | 4.24     | 5.3      | 6.64     | 6.95     | 6.49     | 6.6      | 6.24     | 6.38     | 9.2      |
| Egypt                              | 711.77   | 756.42   | 796.18   | 833.18   | 828.5    | 793.25   | 841.71   | 927.91   | 1066.53  | 1031.91  |
| Iran                               | 654.08   | 735.92   | 851.14   | 974.98   | 951.88   | 684.16   | 626.68   | 748.81   | 839.46   | 750.83   |
| Iraq                               | 217.45   | 246.03   | 276.71   | 305.13   | 323.31   | 364.09   | 412.54   | 484.61   | 684.38   | 802.38   |
| Jordan                             | 44.99    | 48.17    | 45.29    | 51.13    | 53.73    | 70.02    | 69.65    | 75.97    | 90.99    | 96.07    |
| Kuwait                             | 18.65    | 22.88    | 26.07    | 27.07    | 20.97    | 22.14    | 20.55    | 23.45    | 28.92    | 26.28    |
| Lebanon                            | 45.76    | 48.16    | 43.85    | 39.31    | 33.75    | 31.99    | 27.7     | 25.99    | 27.05    | 33.49    |
| Libya                              | 37.04    | 40.4     | 44.57    | 49.46    | 54.01    | 60.48    | 65.99    | 66.89    | 59.32    | 37.87    |
| Morocco                            | 270.13   | 288.71   | 322.41   | 352.9    | 364.37   | 341.89   | 306.51   | 274.8    | 248.57   | 215.23   |
| Palestine                          | 26.85    | 29.28    | 30.87    | 35.17    | 41.89    | 50.45    | 56.58    | 62.76    | 93.93    | 113.64   |
| Oman                               | 19.23    | 22.55    | 27.25    | 32.58    | 35.86    | 39.54    | 45.23    | 44.79    | 42.13    | 44.26    |
| Qatar                              | 1.95     | 2.4      | 3.67     | 4.68     | 5.38     | 5.3      | 5.23     | 6.92     | 10.56    | 12.76    |
| Saudi Arabia                       | 144.38   | 179.1    | 217.88   | 290.96   | 316.63   | 319.69   | 346.31   | 327.24   | 289.17   | 221.62   |
| Sudan                              | 188.19   | 210.25   | 238.02   | 263.17   | 298.31   | 378.18   | 440.91   | 456.99   | 453.36   | 429.22   |
| Syria                              | 133.92   | 157.02   | 177.68   | 199.68   | 217.95   | 236.03   | 245.9    | 238.49   | 248.49   | 144.84   |
| Tunisia                            | 87.67    | 96.21    | 106.96   | 112.12   | 106.79   | 93.24    | 81.25    | 83.46    | 90.96    | 74.15    |
| Turkey                             | 629      | 701.56   | 735.77   | 707.41   | 650.54   | 653.02   | 639.15   | 619.54   | 626.08   | 579.71   |
| United Arab Emirates               | 5.59     | 9.84     | 19.16    | 26.95    | 27.85    | 33.68    | 37.39    | 51.54    | 84.26    | 75.03    |
| Yemen                              | 149.83   | 160.81   | 182.08   | 214.92   | 263.75   | 316.33   | 345.21   | 367.38   | 465.83   | 459.41   |
| South Asia                         | 12641    | 13695.52 | 14941.78 | 16015.19 | 16364.41 | 16372.37 | 16376.92 | 16470.05 | 16296.99 | 14389.91 |
| South Asia                         | 12641    | 13695.52 | 14941.78 | 16015.19 | 16364.41 | 16372.37 | 16376.92 | 16470.05 | 16296.99 | 14389.91 |
| Bangladesh                         | 1295.25  | 1271.91  | 1386.69  | 1564.24  | 1670.46  | 1612.88  | 1578.99  | 1599.12  | 1544.03  | 1370.84  |
| Bhutan                             | 6.83     | 7.68     | 8.34     | 8.97     | 10.03    | 9.21     | 9.77     | 9.78     | 9.94     | 7.51     |
| India                              | 9838.75  | 10744.63 | 11590.3  | 12120.07 | 12284.38 | 12392.35 | 12535.39 | 12551.53 | 12045.82 | 10355.09 |
| Nepal                              | 244.88   | 269.71   | 296.61   | 326.34   | 353.96   | 362.75   | 375.42   | 348.49   | 369.43   | 401.34   |
| Pakistan                           | 1255.28  | 1401.59  | 1659.84  | 1995.58  | 2045.58  | 1995.19  | 1877.36  | 1877.36  | 2328.77  | 2255.14  |
| Sub-Saharan Africa                 | 6393.16  | 7104.54  | 7939.79  | 8810.04  | 9832.95  | 10869.43 | 12141.53 | 13778.35 | 15521.35 | 17349.2  |
| Southern Sub-Saharan Africa        | 465.21   | 522.14   | 583.89   | 658.74   | 720.65   | 743.95   | 778.35   | 824.85   | 868.67   | 913.9    |
| Botswana                           | 12.84    | 14.57    | 16.94    | 18.86    | 19.94    | 21.56    | 22.64    | 24.01    | 26.18    | 26.86    |
| Lesotho                            | 18.91    | 20.34    | 21.87    | 23.18    | 23.28    | 24.9     | 25.85    | 26.05    | 27.17    | 27.5     |
| Namibia                            | 15.18    | 16.97    | 18.06    | 20.25    | 26.4     | 28.91    | 30.22    | 29.27    | 31.71    | 35.5     |
| South Africa                       | 312.64   | 348.22   | 387.5    | 428.09   | 456.89   | 468.4    | 489.3    | 516.31   | 512.16   | 528.1    |
| Swaziland                          | 8.78     | 9.74     | 10.93    | 12.51    | 14.93    | 15.16    | 16.63    | 17.85    | 21.67    | 21.84    |
| Zimbabwe                           | 96.87    | 112.31   | 128.58   | 155.85   | 179.21   | 185.03   | 193.71   | 211.37   | 249.78   | 274.09   |
| Western Sub-Saharan Africa         | 2671.22  | 2915.45  | 3207.12  | 3529     | 3959.07  | 4424.86  | 5015.69  | 5753.67  | 6544.08  | 7201.51  |
| Benin                              | 66.31    | 72.58    | 81.5     | 91.95    | 102.74   | 119.11   | 135.34   | 160.18   | 182.68   | 215.03   |
| Burkina Faso                       | 135.86   | 145.7    | 157.93   | 176.91   | 200.76   | 221.33   | 253.65   | 295.15   | 331.19   | 359.55   |
| Cameroon                           | 153.47   | 165.25   | 182.46   | 207.2    | 235.44   | 261.04   | 291.31   | 333.18   | 385.16   | 432.22   |
| Cape Verde                         | 4.42     | 4.32     | 4.82     | 5.87     | 6.09     | 6.52     | 6.78     | 7.36     | 7.63     | 7.46     |
| Chad                               | 85.55    | 95.89    | 104.02   | 114.46   | 131.17   | 150.62   | 176.51   | 213.18   | 254.3    | 314.07   |
| Cote d'Ivoire                      | 115.04   | 137.73   | 168.43   | 210.09   | 232.8    | 253.28   | 289.29   | 315.94   | 350.22   | 405.56   |
| The Gambia                         | 12.42    | 14.02    | 16.02    | 17.84    | 22.02    | 25.49    | 29.09    | 32.22    | 35.41    | 39.75    |
| Ghana                              | 186.93   | 201.37   | 214.15   | 249.73   | 271.76   | 280.28   | 298.13   | 353.95   | 430.61   | 454.8    |
| Guinea                             | 89.59    | 92.54    | 94.72    | 104.14   | 120.18   | 152      | 167.3    | 182.67   | 203.82   | 231.18   |
| Guinea-Bissau                      | 14.92    | 16.62    | 17.96    | 19.14    | 20.58    | 22.46    | 24.9     | 27.85    | 30.84    | 34.11    |
| Liberia                            | 34.47    | 38.21    | 43.06    | 48.43    | 45.58    | 44.59    | 60.49    | 63.2     | 70.57    | 77.17    |
| Mali                               | 143.1    | 154.81   | 167.13   | 181.6    | 190.5    | 217.31   | 249.73   | 285.44   | 320.18   | 360.74   |
| Mauritania                         | 21.16    | 23.58    | 26.56    | 29.89    | 33.23    | 36.91    | 41.53    | 47.19    | 51.03    | 54.44    |
| Niger                              | 119.55   | 133.03   | 150.1    | 169.5    | 193.25   | 226.06   | 262.78   | 302.79   | 352.66   | 434.12   |
| Nigeria                            | 1291.87  | 1402.34  | 1541.33  | 1636.54  | 1854.23  | 2091.1   | 2386.04  | 2724.7   | 3073.89  | 3260.87  |
| Sao Tome and Principe              | 1.48     | 1.65     | 1.87     | 2.04     | 2.2      | 2.42     | 2.68     | 2.9      | 3.18     | 3.47     |
| Senegal                            | 91.78    | 103.98   | 113.35   | 127.42   | 145.07   | 161.02   | 174.94   | 210.41   | 243.96   | 275.45   |
| Sierra Leone                       | 57.04    | 61.13    | 65.8     | 70.47    | 76.66    | 73.27    | 76.33    | 95.7     | 107.86   | 120.42   |
| Togo                               | 46.27    | 50.7     | 55.9     | 65.78    | 74.81    | 80.04    | 88.87    | 99.66    | 108.88   | 121.11   |
| Eastern Sub-Saharan Africa         | 2535.58  | 2874.92  | 3263.21  | 3635.38  | 4045.11  | 4411.62  | 4879.54  | 5489.92  | 6122.67  | 6849.94  |
|                                    |          |          |          |          |          |          |          |          |          |          |

Appendix Table 15C. Live births (in thousands) by location, females, 1970, 1975, 1980, 1985, 1990, 1995, 2000, 2005, 2010, 2016

| Country                          | 1970   | 1975   | 1980   | 1985   | 1990    | 1995   | 2000    | 2005    | 2010    | 2016    |
|----------------------------------|--------|--------|--------|--------|---------|--------|---------|---------|---------|---------|
| Malawi                           | 130.54 | 143.11 | 158.49 | 175.92 | 228.93  | 223.1  | 245.15  | 269.17  | 309.77  | 354.61  |
| Mozambique                       | 211.71 | 238.64 | 274.29 | 282.66 | 267.62  | 328.55 | 378.4   | 439.03  | 502.61  | 544.04  |
| Rwanda                           | 94.53  | 112.85 | 135.54 | 154.76 | 162.89  | 135.17 | 162.34  | 187.82  | 194.51  | 197.75  |
| Somalia                          | 63.64  | 71.59  | 111.29 | 107.76 | 108.72  | 103.51 | 111.87  | 121.64  | 132.25  | 148.06  |
| South Sudan                      | 107.41 | 116.6  | 130.2  | 149.49 | 155.29  | 144.27 | 173.52  | 209.24  | 261.08  | 333.9   |
| Tanzania                         | 369.96 | 421.44 | 475.09 | 529.9  | 587.96  | 667.9  | 708.75  | 793.23  | 893.82  | 974.09  |
| Uganda                           | 259.27 | 293.37 | 334.25 | 379.59 | 436     | 490.21 | 559.31  | 645.35  | 734.67  | 831.81  |
| Zambia                           | 112.61 | 128.97 | 145.99 | 168.99 | 185.87  | 197.56 | 219.85  | 244.82  | 275.54  | 314.71  |
| Central Sub-Saharan Africa       | 721.15 | 792.02 | 885.57 | 986.92 | 1108.11 | 1289   | 1467.95 | 1709.9  | 1985.92 | 2383.86 |
| Angola                           | 148.48 | 168.39 | 195.47 | 230.79 | 260.15  | 303.32 | 346.88  | 404.12  | 470.75  | 546.22  |
| Central African Republic         | 35.44  | 37.96  | 42.17  | 48.64  | 52.55   | 59.53  | 65.48   | 69.5    | 77.18   | 87.96   |
| Congo                            | 28.32  | 31.93  | 35.72  | 40.44  | 45.93   | 52.15  | 59.36   | 65.02   | 75.02   | 79.54   |
| Democratic Republic of the Congo | 490.64 | 537.79 | 595.95 | 646.45 | 726.1   | 848.51 | 968.69  | 1140.82 | 1329.36 | 1632.76 |
| Equatorial Guinea                | 6.12   | 3.86   | 3.68   | 6.9    | 8.03    | 8.31   | 8.11    | 8.59    | 9.64    | 11.17   |
| Gabon                            | 12.15  | 12.11  | 12.59  | 13.7   | 15.35   | 17.17  | 19.42   | 21.86   | 23.97   | 26.2    |

Appendix Table 16A. Under-5 populations (in thousands) by location, both sexes combined, 1970, 1975, 1980, 1985, 1990, 1995, 2000, 2005, 2010, 2016

| Country                                          | 1970     | 1980      | 1985      | 1990      | 1995      | 2000      | 2005      | 2010      | 2016      |
|--------------------------------------------------|----------|-----------|-----------|-----------|-----------|-----------|-----------|-----------|-----------|
| Global                                           | 491538.8 | 530813.19 | 568300.87 | 598467.69 | 596764.32 | 591232.65 | 600221.69 | 626918.78 | 631970.98 |
| High-income                                      | 67097.91 | 60377.57  | 60031.34  | 59980.65  | 59691.22  | 58351.88  | 58109.83  | 59849.66  | 57711.26  |
| High-income North America                        | 19030.77 | 18238.32  | 19907     | 21339.6   | 21913.98  | 21469.7   | 21894.1   | 22565.63  | 21613.47  |
| Canada                                           | 1773.54  | 1771.24   | 1845.44   | 1891.07   | 1932.27   | 1715.76   | 1667.55   | 1833.59   | 1939.72   |
| Greenland                                        | 8.13     | 4.64      | 4.9       | 5.24      | 5.22      | 4.51      | 3.98      | 3.64      | 3.41      |
| United States                                    | 17236.43 | 16453.5   | 18046.88  | 19432.89  | 19965.96  | 19740.05  | 20214.02  | 20720.4   | 19663.32  |
| Australasia                                      | 1462.05  | 1358.14   | 1420.59   | 1502.16   | 1568.57   | 1517.8    | 1521.45   | 1710.22   | 1776.22   |
| Australia                                        | 1162.82  | 1100.77   | 1172.02   | 1223.9    | 1281.12   | 1236.2    | 1241.84   | 1400.08   | 1490.53   |
| New Zealand                                      | 299.23   | 257.37    | 248.57    | 278.26    | 287.45    | 281.6     | 279.61    | 310.13    | 285.7     |
| High-income Asia Pacific                         | 13695.42 | 12718.39  | 11441.69  | 10008.75  | 9719.13   | 9159.49   | 8160.36   | 7918.51   | 7352.61   |
| Brunei                                           | 15.54    | 25.07     | 29.58     | 33.1      | 36.34     | 39.13     | 37.6      | 33.77     | 32.97     |
| Japan                                            | 8961.35  | 8464.35   | 7548.5    | 6541.91   | 5992.38   | 5895.18   | 5614.41   | 5461.16   | 5015.79   |
| Singapore                                        | 231.99   | 190.52    | 204.42    | 242.86    | 242.03    | 221.89    | 186.52    | 179.83    | 176.87    |
| South Korea                                      | 4486.54  | 4038.45   | 3659.19   | 3190.87   | 3448.38   | 3003.29   | 2321.83   | 2243.75   | 2126.98   |
| Western Europe                                   | 29477.46 | 23840.13  | 22830.98  | 22598.7   | 21917.67  | 21479.48  | 21639.56  | 22669.25  | 21945.46  |
| Andorra                                          | 0.67     | 1.23      | 1.74      | 2.24      | 2.84      | 3.03      | 2.95      | 3.13      | 3.05      |
| Austria                                          | 595.6    | 427.93    | 443.84    | 431.57    | 459.03    | 409.55    | 389.22    | 386.82    | 401.95    |
| Belgium                                          | 699.28   | 589.4     | 580.83    | 589.93    | 597.43    | 575.79    | 579.29    | 624.9     | 631.97    |
| Cyprus                                           | 70.59    | 56.83     | 60.93     | 59.34     | 56.37     | 44.87     | 40.56     | 45.56     | 49.63     |
| Denmark                                          | 374.33   | 303.82    | 261.6     | 291.6     | 334.15    | 332.63    | 323.18    | 320.05    | 288.4     |
| Finland                                          | 346.02   | 319.38    | 321.45    | 311.7     | 324.55    | 291.99    | 284.02    | 296.64    | 290.46    |
| France                                           | 4132.14  | 3678.29   | 3821.81   | 3799.69   | 3626.45   | 3700.05   | 3832.31   | 3964.22   | 3919.03   |
| Germany                                          | 5854.45  | 4010.51   | 4102.71   | 4258.7    | 3948.23   | 3898.39   | 3550.48   | 3357.52   | 3429.58   |
| Greece                                           | 727.91   | 706.13    | 633.78    | 526.16    | 512.2     | 513.64    | 524.79    | 576.91    | 472.55    |
| Iceland                                          | 21.01    | 20.93     | 20.58     | 21.68     | 22.37     | 20.86     | 20.75     | 23.4      | 21.46     |
| Ireland                                          | 305.34   | 345.05    | 330.62    | 279.12    | 248.44    | 263.66    | 298.95    | 363.04    | 336.37    |
| Israel                                           | 334.59   | 476.41    | 509.86    | 506.11    | 533.36    | 616.96    | 696.08    | 775.04    | 837.75    |
| Italy                                            | 4610.64  | 3549.96   | 3014.97   | 2811.83   | 2720.13   | 2651.55   | 2714.06   | 2796.98   | 2540.99   |
| Luxembourg                                       | 22.72    | 19.61     | 20.73     | 22.42     | 26.08     | 27.43     | 26.84     | 27.62     | 30.21     |
| Malta                                            | 24.49    | 28.71     | 28.42     | 29.2      | 26.71     | 23.35     | 18.53     | 18.9      | 19.08     |
| Netherlands                                      | 1172.19  | 863.4     | 863.32    | 928.96    | 963.27    | 978.66    | 988.69    | 924.99    | 869.84    |
| Norway                                           | 319.55   | 253.26    | 249.95    | 280.44    | 297.99    | 295.07    | 282.26    | 298.29    | 297.16    |
| Portugal                                         | 922.35   | 807.62    | 699.69    | 596.94    | 554.98    | 562.66    | 555.03    | 511.41    | 423.7     |
| Spain                                            | 3242.83  | 3066.09   | 2413.54   | 2054.52   | 1883.76   | 1867.18   | 2157.12   | 2456.44   | 2165.62   |
| Sweden                                           | 560.14   | 477.26    | 470.56    | 553.52    | 573       | 453.55    | 489.84    | 548.2     | 571.94    |
| Switzerland                                      | 507.68   | 361.14    | 367.58    | 390.95    | 413.6     | 395.52    | 363.38    | 380.69    | 416.73    |
| United Kingdom                                   | 4608.8   | 3456.84   | 2592.6    | 3829.48   | 3769.78   | 3530.56   | 3477.88   | 3945.37   | 3904.71   |
| England                                          | 3746.79  | 2820.61   | 2954.57   | 3197.12   | 3160.83   | 2966.96   | 2945.89   | 3352.7    | 3330.53   |
| East Midlands                                    | 292.82   | 232.36    | 238.37    | 252.47    | 255.88    | 238.6     | 236.13    | 267.76    | 267.92    |
| East of England                                  | 344.58   | 280.52    | 298.6     | 330.49    | 324.45    | 306.65    | 311.89    | 352.59    | 359.16    |
| Greater London                                   | 600.69   | 448.04    | 470.05    | 537.91    | 536.62    | 534.1     | 547.23    | 649.44    | 652.49    |
| North East England                               | 232.01   | 161.33    | 165.4     | 166.25    | 162.74    | 144.24    | 137.05    | 147.37    | 144.39    |
| North West England                               | 621.41   | 432.38    | 449.46    | 467.84    | 450.36    | 405.03    | 392.34    | 443       | 423.62    |
| South East England                               | 504.79   | 411       | 438.91    | 490.12    | 482.14    | 453.86    | 450.06    | 517.7     | 513.98    |
| South West England                               | 290.44   | 236.19    | 250.21    | 273.99    | 277.92    | 260.22    | 254.96    | 292.97    | 295.19    |
| West Midlands                                    | 458.56   | 324.67    | 336.35    | 355.03    | 346.65    | 324.92    | 320.9     | 359.5     | 352.49    |
| Yorkshire and the Humber                         | 401.49   | 294.13    | 307.23    | 323.02    | 324.07    | 299.34    | 295.34    | 322.36    | 321.29    |
| Northern Ireland                                 | 148.48   | 140.88    | 138.65    | 135.62    | 122.89    | 115.74    | 109.15    | 123.33    | 119.77    |
| Scotland                                         | 461.03   | 320.89    | 323.77    | 320.37    | 312.49    | 282.83    | 264.22    | 291.38    | 285.55    |
| Wales                                            | 252.5    | 174.45    | 175.61    | 176.38    | 173.58    | 165.03    | 158.62    | 177.96    | 168.87    |
| Southern Latin America                           | 3432.22  | 4222.59   | 4431.08   | 4531.44   | 4571.87   | 4725.4    | 4894.36   | 4986.05   | 5023.48   |
| Argentina                                        | 2033.33  | 2917.77   | 3000.79   | 2948.02   | 2921.4    | 3155.64   | 3432.23   | 3555.33   | 3581.64   |
| Chile                                            | 1144.57  | 1059.57   | 1201.93   | 1345.24   | 1385.17   | 1296.59   | 1210.64   | 1197.56   | 1204.1    |
| Uruguay                                          | 254.1    | 245.11    | 228.23    | 238.05    | 265.15    | 272.99    | 251.31    | 233       | 237.59    |
| Central Europe, Eastern Europe, and Central Asia | 29850.89 | 33231.77  | 35224.53  | 34984.64  | 27490.33  | 22651.94  | 22904.93  | 26064.48  | 28193.12  |
| Eastern Europe                                   | 14209.09 | 15634.22  | 17013.55  | 16575.31  | 11580.3   | 9354.58   | 9969.29   | 11660.52  | 12958.71  |
| Belarus                                          | 727.24   | 735.67    | 804.37    | 773.01    | 594.84    | 472.64    | 453.53    | 515.5     | 575.9     |
| Estonia                                          | 97.56    | 106.95    | 114.96    | 118.45    | 80.64     | 63.29     | 66.85     | 76.67     | 68.54     |
| Latvia                                           | 161.67   | 168.99    | 191.41    | 197.94    | 137.91    | 96.42     | 101.87    | 107.74    | 105.8     |
| Lithuania                                        | 266.29   | 252.15    | 269.91    | 285.15    | 235.47    | 181.49    | 150.85    | 155.81    | 150.3     |
| Moldova                                          | 358.15   | 401.58    | 432.55    | 422.53    | 322.5     | 232.86    | 212.58    | 226.17    | 224.9     |
| Russia                                           | 9153.67  | 10383.69  | 11437.76  | 11235.09  | 7434.3    | 6224.66   | 6983.24   | 8194.62   | 9377.3    |
| Ukraine                                          | 3444.51  | 3585.2    | 3762.6    | 3543.13   | 2774.64   | 2083.21   | 2000.36   | 2384.01   | 2455.97   |
| Central Europe                                   | 9154.64  | 10282.03  | 9731.84   | 9025.9    | 7349.37   | 6128.02   | 5675.42   | 5926.37   | 5587.27   |
| Albania                                          | 250.31   | 317.37    | 362.2     | 403.71    | 375.46    | 290.38    | 212.52    | 179.26    | 185.3     |
| Bosnia and Herzegovina                           | 421.19   | 353.27    | 374.07    | 373.09    | 298.37    | 207.21    | 164.54    | 173.84    | 170.89    |
| Bulgaria                                         | 644.79   | 671.52    | 604.71    | 564.54    | 416.77    | 340.36    | 337.64    | 364.29    | 332.63    |
| Croatia                                          | 317.86   | 322.36    | 323.32    | 293.15    | 247.94    | 226.58    | 198.05    | 206.64    | 196.75    |
| Czech Republic                                   | 673.55   | 858.75    | 691.48    | 652.7     | 563.7     | 441.49    | 469.53    | 566.02    | 544.77    |
| Hungary                                          | 717.02   | 818.55    | 651.82    | 616.64    | 582.16    | 487.72    | 475.27    | 478.75    | 452.63    |
| Macedonia                                        | 202.22   | 194.42    | 189.44    | 171.3     | 165.22    | 143.38    | 121.08    | 115.14    | 112.23    |
| Montenegro                                       | 57.64    | 51.89     | 53.15     | 50.65     | 46.24     | 42.25     | 38.71     | 38.53     | 36.42     |
| Poland                                           | 2480.44  | 3244.99   | 3410.52   | 2887.74   | 2308.1    | 1905.76   | 1789.33   | 1993.01   | 1869.37   |
| Romania                                          | 2163.03  | 2061.34   | 1746.84   | 1774.27   | 1242.23   | 1112.6    | 1034.82   | 982.2     | 878.38    |
| Serbia                                           | 703      | 761.49    | 741.56    | 706.3     | 653.13    | 558.23    | 488.16    | 438.73    | 413.71    |
| Slovakia                                         | 383.1    | 476.87    | 449.16    | 412.4     | 349.96    | 281.93    | 257.32    | 285.04    | 288.31    |
| Slovenia                                         | 140.48   | 149.2     | 133.58    | 119.42    | 100.07    | 90.13     | 88.44     | 104.92    | 105.88    |
| Central Asia                                     | 6487.12  | 7315.52   | 8479.14   | 9383.43   | 8560.66   | 7169.34   | 7260.22   | 8477.59   | 9647.13   |
| Armenia                                          | 286.74   | 360.31    | 418.38    | 406.8     | 297.43    | 197.57    | 182.47    | 198.05    | 221.37    |
| Azerbaijan                                       | 676.29   | 708.57    | 808.34    | 877.79    | 818.56    | 639.1     | 652.94    | 875.83    | 956.73    |
| Georgia                                          | 412.05   | 446.41    | 460.42    | 458.72    | 354.54    | 257.59    | 265.83    | 312.01    | 333.2     |
| Kazakhstan                                       | 1890.48  | 1882.58   | 1963.9    | 1955.65   | 1582.22   | 1221.81   | 1292.08   | 1689.37   | 1959.14   |
| Kyrgyzstan                                       | 432.31   | 469.83    | 548.75    | 612       | 568.56    | 497.07    | 492.57    | 604.2     | 747.67    |
| Mongolia                                         | 227.01   | 263.43    | 303.48    | 326.72    | 280.67    | 238.07    | 233.87    | 291.14    | 372.32    |
| Tajikistan                                       | 468.02   | 572.64    | 723.5     | 880.39    | 853.09    | 763.68    | 763.8     | 889.76    | 1138.5    |
| Turkmenistan                                     | 295.52   | 368.81    | 455.26    | 552.27    | 570.57    | 493.24    | 474.81    | 516.52    | 577.54    |
| Uzbekistan                                       | 1798.69  | 2242.95   | 2797.1    | 3313.09   | 3235.07   | 2861.21   | 2901.86   | 3100.7    | 3340.68   |
| Latin America and Caribbean                      | 38654.8  | 46995.2   | 50310.16  | 52237.03  | 53118.07  | 53079.99  | 51753.22  | 50774.94  | 49604.99  |
| Central Latin America                            | 16419.37 | 20386.85  | 21999.91  | 23788.47  | 24929.45  | 25181.31  | 24743.79  | 24032.87  | 22843.84  |
| Colombia                                         | 3014.33  | 3633.58   | 3981.19   | 4275.31   | 4362.89   | 4198.27   | 4085.03   | 3991.32   | 3573.32   |
| Costa Rica                                       | 287.45   | 314.36    | 367.02    | 397.85    | 380.54    | 374.96    | 357.28    | 343.01    | 304.2     |
| El Salvador                                      | 606.29   | 746.75    | 712.2     | 723.09    | 745.18    | 732.22    | 676       | 614.09    | 533.92    |
| Guatemala                                        | 1001.97  | 1237.89   | 1367.34   | 1553.92   | 1746.7    | 1907.89   | 1986.13   | 1975.65   | 1971.72   |
| Honduras                                         | 530.79   | 676.49    | 760.74    | 838.28    | 853.15    | 851.59    | 851.59    | 891.05    | 947.12    |
| Mexico                                           | 8594.86  | 10851.18  | 11813.67  | 12570.12  | 13235.01  | 13354.25  | 12868.02  | 12254.88  | 11671.42  |
|                                                  |          |           |           |           |           |           |           |           |           |

**Appendix Table 16A. Under-5 populations (in thousands) by location, both sexes combined, 1970, 1975, 1980, 1985, 1990, 1995, 2000, 2005, 2010, 2016**

| Country                                | 1970      | 1980      | 1985      | 1990      | 1995      | 2000      | 2005      | 2010      | 2016      |
|----------------------------------------|-----------|-----------|-----------|-----------|-----------|-----------|-----------|-----------|-----------|
| Panama                                 | 247.05    | 267.89    | 273.81    | 286.22    | 311.18    | 330.79    | 325.01    | 345.2     | 346.73    |
| Venezuela                              | 1827.4    | 2245.18   | 2437.92   | 2586.15   | 2653.39   | 2736.14   | 2895.21   | 2944.52   | 2886.27   |
| Andean Latin America                   | 3500.79   | 4652.59   | 5155.56   | 5504.1    | 5675.68   | 5751.74   | 5720.04   | 6019.73   | 6662.74   |
| Bolivia                                | 738.88    | 960.92    | 1048.51   | 1094.47   | 1152.43   | 1228.44   | 1263.6    | 1294.51   | 1368.6    |
| Ecuador                                | 913.38    | 1264.2    | 1434.58   | 1524.25   | 1600.96   | 1626.68   | 1630.86   | 1700.48   | 1788.5    |
| Peru                                   | 1848.53   | 2427.47   | 2672.47   | 2885.38   | 2922.29   | 2896.62   | 2825.58   | 3024.74   | 3505.64   |
| Caribbean                              | 4023.73   | 3896.28   | 4010.67   | 4173.3    | 4113.93   | 4135.84   | 4097.55   | 4033.45   | 3989.54   |
| Antigua and Barbuda                    | 9.57      | 7.55      | 6.41      | 5.59      | 5.38      | 6.1       | 6.54      | 6.36      | 6.1       |
| The Bahamas                            | 22.8      | 25.73     | 27.37     | 28.03     | 30.55     | 28.86     | 27.84     | 30.71     | 33        |
| Barbados                               | 26.38     | 23.02     | 22.8      | 20.31     | 17.64     | 15.7      | 15.76     | 15.74     | 14.79     |
| Belize                                 | 24.26     | 28.17     | 33.14     | 36.82     | 33.17     | 34.29     | 39.91     | 43.23     | 47.51     |
| Bermuda                                | 4.78      | 3.51      | 3.59      | 3.91      | 4.1       | 4.21      | 4.33      | 4.36      | 4.39      |
| Cuba                                   | 1272.22   | 767.93    | 788.63    | 894       | 770.93    | 736.96    | 669.14    | 603.98    | 599.52    |
| Dominica                               | 13.93     | 9.41      | 9.27      | 8.58      | 8.15      | 6.73      | 5.9       | 5.55      | 5.32      |
| Dominican Republic                     | 662.91    | 903.84    | 903.62    | 897.35    | 1000.23   | 1033.96   | 1025.59   | 994.68    | 941.19    |
| Grenada                                | 14.38     | 13.17     | 14.54     | 14.61     | 12.11     | 11.05     | 9.81      | 9.18      | 8.7       |
| Guyana                                 | 99.88     | 113.66    | 108.92    | 105.13    | 105.45    | 99.02     | 84.78     | 71.5      | 65.34     |
| Haiti                                  | 766.12    | 949.71    | 1063.62   | 1151.83   | 1179.68   | 1263.79   | 1376.93   | 1462.02   | 1519.37   |
| Jamaica                                | 349.61    | 319.04    | 323.75    | 337.07    | 336.01    | 322.49    | 299.72    | 278.41    | 276.67    |
| Puerto Rico                            | 357.4     | 380.63    | 324.94    | 312.92    | 288.79    | 265.01    | 235.85    | 216.96    | 209.58    |
| Saint Lucia                            | 22.77     | 22.17     | 22        | 20.58     | 17.8      | 15.11     | 13.06     | 11.18     | 9.63      |
| Saint Vincent and the Grenadines       | 17.64     | 17.81     | 17.24     | 15.55     | 13.57     | 11.73     | 10.13     | 9.44      | 9.14      |
| Suriname                               | 62.19     | 51.68     | 55.23     | 56.31     | 57.1      | 57.9      | 56.32     | 52.3      | 46.46     |
| Trinidad and Tobago                    | 142.43    | 145.02    | 170.05    | 141.78    | 106.03    | 98.21     | 91.42     | 89.42     | 68.89     |
| Tropical Latin America                 | 14710.91  | 18059.49  | 18944.02  | 18771.15  | 18399.01  | 18011.11  | 17191.84  | 16691.89  | 16108.86  |
| Brazil                                 | 14331.06  | 17604.36  | 18415.91  | 18138.97  | 17697.89  | 17293.93  | 16500.2   | 16029.23  | 15478.11  |
| Paraguay                               | 379.85    | 455.12    | 528.12    | 632.18    | 701.12    | 717.18    | 691.64    | 662.65    | 630.75    |
| Southeast Asia, East Asia, and Oceania | 171342.99 | 156218.95 | 162168.45 | 167848.76 | 157941.58 | 143236.79 | 132522.18 | 130287.6  | 123071.67 |
| East Asia                              | 127214.7  | 106094.87 | 108751.58 | 112425.92 | 100295.78 | 84800.71  | 72988.16  | 69958.16  | 64630.98  |
| China                                  | 122576.94 | 101761.9  | 104343.41 | 107858.53 | 95335.76  | 79007.49  | 68493.85  | 65997     | 60657.92  |
| North Korea                            | 2770.64   | 2394.88   | 2576.97   | 2979.28   | 3354.28   | 3583.67   | 3333.53   | 2996.82   | 2958.99   |
| Taiwan (Province of China)             | 1867.12   | 1938.09   | 1831.2    | 1588.11   | 1605.74   | 1489.55   | 1160.78   | 964.33    | 1014.07   |
| Southeast Asia                         | 43430.89  | 49241.45  | 52469.21  | 54392.86  | 56520.92  | 57928.24  | 58250.74  | 59008.36  | 57027.77  |
| Cambodia                               | 1058.95   | 1132.44   | 1143.27   | 1230.61   | 1353.71   | 1445.97   | 1603.97   | 1815.14   | 1883.8    |
| Indonesia                              | 17898.65  | 19507.39  | 20386.39  | 20545.77  | 21749.41  | 23099.4   | 23685.23  | 24088.26  | 22726.43  |
| Laos                                   | 446.04    | 536.99    | 566.9     | 650.38    | 748.61    | 811.07    | 849.19    | 952.15    | 1130.32   |
| Malaysia                               | 1665.89   | 1893.48   | 2208.12   | 2444.54   | 2628.7    | 2649.28   | 2452.68   | 2522.84   | 2567.66   |
| Maldives                               | 10.56     | 12.88     | 15.97     | 19.61     | 22.36     | 23.85     | 26.22     | 32.32     | 31.34     |
| Mauritius                              | 108.27    | 115.73    | 96.74     | 101.51    | 110.59    | 100.94    | 91.31     | 73.99     | 66.16     |
| Myanmar                                | 3036.35   | 4042.6    | 4499      | 4859.16   | 4958.25   | 5043.84   | 5141.46   | 5088.57   | 4657.56   |
| Philippines                            | 5660.87   | 7209.84   | 8074.72   | 8823.13   | 9607.89   | 10242.1   | 10750.55  | 11100.98  | 11567.29  |
| Sri Lanka                              | 1676.7    | 1910.69   | 1982.22   | 1782.04   | 1769.95   | 1661.2    | 1792.47   | 1823.16   | 1511.47   |
| Seychelles                             | 8.93      | 8.68      | 8.95      | 8.19      | 7.97      | 7.2       | 7.62      | 8.56      | 8.35      |
| Thailand                               | 6237.14   | 6781.36   | 6222.79   | 5826.76   | 5768.03   | 5455.87   | 4634.89   | 3847.37   | 3093.82   |
| Timor-Leste                            | 80.06     | 94.58     | 101.52    | 110.17    | 118.09    | 102.36    | 100.23    | 151.81    | 165.53    |
| Vietnam                                | 5467.91   | 5937.33   | 7100.4    | 7923.47   | 7608.06   | 7214.38   | 7040.4    | 7432.26   | 7553.61   |
| Oceania                                | 697.4     | 882.63    | 947.65    | 1029.97   | 1124.88   | 1227.84   | 1283.28   | 1321.08   | 1412.92   |
| Federated States of Micronesia         | 13.25     | 15.18     | 17.37     | 17.46     | 16.54     | 14.8      | 11.99     | 10.05     | 9.57      |
| Fiji                                   | 82.26     | 99.52     | 100.69    | 90.81     | 78.94     | 70.31     | 63.38     | 57.61     | 50.83     |
| Kiribati                               | 9.56      | 12.44     | 13.18     | 14.01     | 14.3      | 13.85     | 13.79     | 13.88     | 13.52     |
| Marshall Islands                       | 3.97      | 5.55      | 6.27      | 7.26      | 8.25      | 9.19      | 9.7       | 9.91      | 9.91      |
| Papua New Guinea                       | 428.85    | 562.72    | 604.5     | 676.44    | 771.96    | 878.19    | 939.86    | 988.05    | 1077.6    |
| Samoa                                  | 26.7      | 27.81     | 28.33     | 28.04     | 27.47     | 27.68     | 27.82     | 28.1      | 27.48     |
| Solomon Islands                        | 27.75     | 39.77     | 46.5      | 51.6      | 58.9      | 69.04     | 76.23     | 81.76     | 83.33     |
| Tonga                                  | 14.38     | 14.87     | 15.31     | 16.11     | 16.06     | 15.04     | 15.11     | 15.1      | 13.46     |
| Vanuatu                                | 16.96     | 23.22     | 26.45     | 28.97     | 31.41     | 33.25     | 34.97     | 37.86     | 40.57     |
| North Africa and Middle East           | 31616.38  | 41743.01  | 46535.69  | 49982.44  | 50886.04  | 52455.04  | 55678.17  | 60996.4   | 63190.72  |
| North Africa and Middle East           | 31616.38  | 41743.01  | 46535.69  | 49982.44  | 50886.04  | 52455.04  | 55678.17  | 60996.4   | 63190.72  |
| Afghanistan                            | 1996.47   | 2464.34   | 2332.79   | 2192.9    | 2006.3    | 3153.36   | 3738.3    | 4228.55   | 4957.28   |
| Algeria                                | 2411.1    | 3095.15   | 3531.96   | 3901      | 4227.11   | 4757.93   | 5148.52   | 5085.43   | 4549.61   |
| Bahrain                                | 33.38     | 47.71     | 59.05     | 68.26     | 66.65     | 67.24     | 58.16     | 78.3      | 99.7      |
| Egypt                                  | 5587.94   | 6855.91   | 7489.49   | 7917      | 7784.5    | 8000.77   | 8784.7    | 9971.82   | 10906.5   |
| Iran                                   | 4854.43   | 7317.42   | 8604.69   | 9439.87   | 7939.44   | 6206.61   | 6776.42   | 8067.67   | 8064.69   |
| Iraq                                   | 1873.71   | 2497.22   | 2809.87   | 3060.43   | 3369.97   | 3861.94   | 4320.38   | 5786.84   | 7705      |
| Jordan                                 | 354.78    | 448.33    | 473.15    | 517.88    | 621.12    | 699.59    | 720.23    | 841.79    | 960.26    |
| Kuwait                                 | 148       | 240.61    | 270.61    | 239.06    | 209.99    | 211.71    | 218.78    | 267.62    | 281.84    |
| Lebanon                                | 436.16    | 444.29    | 404.45    | 360.88    | 327.91    | 298.49    | 265.51    | 263.86    | 320.81    |
| Libya                                  | 317.56    | 407.58    | 459.25    | 511.71    | 568.64    | 637.39    | 673.61    | 649.79    | 462.98    |
| Morocco                                | 2270.87   | 2779.71   | 3162.95   | 3450.78   | 3458.6    | 3191.68   | 2879.84   | 2606.96   | 2291.38   |
| Palestine                              | 270.74    | 291.01    | 318.29    | 380.21    | 458.77    | 538.68    | 581.64    | 777.05    | 1085.42   |
| Oman                                   | 136.89    | 224.09    | 283.24    | 335.24    | 375.94    | 424.46    | 460.07    | 443.56    | 443.37    |
| Qatar                                  | 16.18     | 29.97     | 41.87     | 51.53     | 54.78     | 51.62     | 61.62     | 87.53     | 123.81    |
| Saudi Arabia                           | 1150.53   | 1851.01   | 2441.65   | 2970.77   | 3139.06   | 3320.05   | 3370.63   | 3113.37   | 2492.07   |
| Sudan                                  | 1528.17   | 1971.11   | 2150.32   | 2499.03   | 3093.86   | 3861.48   | 4282.88   | 4357.3    | 4193.42   |
| Syria                                  | 1173.83   | 1626.94   | 1853.26   | 2067.84   | 2258.66   | 2436.22   | 2432.73   | 2509.98   | 1767      |
| Tunisia                                | 762.44    | 953.64    | 1060.52   | 1080.38   | 990.11    | 860.07    | 815.47    | 885.48    | 834.44    |
| Turkey                                 | 5164.56   | 6586.52   | 6788.21   | 6474.5    | 6271.84   | 6374.48   | 6185.29   | 6233.64   | 6158.56   |
| United Arab Emirates                   | 44.54     | 142.01    | 231.58    | 274.35    | 307.9     | 356.73    | 435.67    | 691.38    | 815.47    |
| Yemen                                  | 1070.93   | 1445.48   | 1739.26   | 2157.44   | 2721.14   | 3110      | 3422.72   | 3999.06   | 4626.73   |
| South Asia                             | 102321.28 | 127563.86 | 141286.82 | 151354.7  | 155801.9  | 158436.02 | 161162.96 | 162741.18 | 153610.26 |
| South Asia                             | 102321.28 | 127563.86 | 141286.82 | 151354.7  | 155801.9  | 158436.02 | 161162.96 | 162741.18 | 153610.26 |
| Bangladesh                             | 102028.71 | 11269.14  | 12905     | 14605.88  | 15155.4   | 14968.27  | 15251.58  | 15307.53  | 14329.41  |
| Bhutan                                 | 49.63     | 67.19     | 74.72     | 85.75     | 88.76     | 88.63     | 94.24     | 91.17     | 78.07     |
| India                                  | 79762.16  | 100042.56 | 108734.14 | 114509.49 | 118101.98 | 121291.83 | 123898.23 | 123008.28 | 112140.64 |
| Nepal                                  | 1846.63   | 2381.42   | 2700.64   | 3062.58   | 3339.02   | 3548.55   | 3503.43   | 3469.43   | 3990.87   |
| Pakistan                               | 10454.16  | 13803.55  | 16872.32  | 19091     | 19116.74  | 18538.75  | 18415.48  | 20864.77  | 23071.27  |
| Sub-Saharan Africa                     | 50654.58  | 64682.83  | 72743.87  | 82079.48  | 91835.18  | 103020.99 | 118090.4  | 136201.53 | 156588.97 |
| Southern Sub-Saharan Africa            | 3979.43   | 5109.09   | 5801.85   | 6550.71   | 6985.21   | 7195.91   | 7608.31   | 8073.04   | 8608.25   |
| Botswana                               | 112.62    | 150.18    | 172.26    | 189.11    | 200.74    | 213.19    | 225.7     | 248.05    | 264.73    |
| Lesotho                                | 168.15    | 195.44    | 209.6     | 218.47    | 226.11    | 236.63    | 239.8     | 247.57    | 258.22    |
| Namibia                                | 133.91    | 163.81    | 178.94    | 221.95    | 268.48    | 284.63    | 284.88    | 291.53    | 332.84    |
| South Africa                           | 2650.27   | 3386.18   | 3794.09   | 4181.85   | 4413.09   | 4528.93   | 4809.02   | 4932.45   | 5011.2    |
| Swaziland                              | 71.07     | 93.88     | 108.33    | 130.82    | 143.91    | 149.48    | 160.56    | 185.37    | 208.54    |
| Zimbabwe                               | 843.42    | 1119.6    | 1338.63   | 1608.52   | 1732.87   | 1783.04   | 1888.35   | 2168.06   | 2532.71   |
| Western Sub-Saharan Africa             | 20869.65  | 25893.95  | 28953.16  | 32521.9   | 36816.47  | 41771.92  | 48393.68  | 56486.67  | 64619.76  |
| Benin                                  | 502.96    | 643.92    | 745.64    | 850.32    | 984.32    | 1146.82   | 1357.29   | 1604.17   | 1910.74   |



Appendix Table 16A. Under-5 populations (in thousands) by location, both sexes combined, 1970, 1975, 1980, 1985, 1990, 1995, 2000, 2005, 2010, 2016

| Country                          | 1970     | 1980     | 1985    | 1990     | 1995     | 2000     | 2005     | 2010     | 2016     |
|----------------------------------|----------|----------|---------|----------|----------|----------|----------|----------|----------|
| Burkina Faso                     | 1027.18  | 1237.49  | 1399.25 | 1617.16  | 1829.13  | 2079.7   | 2458.34  | 2872.58  | 3194.76  |
| Cameroon                         | 1249.41  | 1520.02  | 1736.43 | 2005.02  | 2252.4   | 2493.83  | 2841.82  | 3312.03  | 3877.23  |
| Cape Verde                       | 37.96    | 41.89    | 50.35   | 57.54    | 60.63    | 64.52    | 69.35    | 74.73    | 75.08    |
| Chad                             | 656.78   | 836.03   | 916.21  | 1050.22  | 1221.99  | 1422.67  | 1711.53  | 2094.32  | 2641.51  |
| Cote d'Ivoire                    | 878.01   | 1331.58  | 1684.23 | 1989.16  | 2167.08  | 2430.84  | 2753.63  | 3052.14  | 3558.7   |
| The Gambia                       | 102.26   | 133.93   | 152.69  | 182.7    | 220.64   | 256.31   | 290.92   | 324.2    | 366.63   |
| Ghana                            | 1612.51  | 1873.44  | 2106.37 | 2433.85  | 2581.63  | 2679.42  | 3075.03  | 3739.15  | 4346.43  |
| Guinea                           | 659.58   | 738.69   | 802.34  | 922.41   | 1159.58  | 1393.68  | 1552.14  | 1745.14  | 2034.88  |
| Guinea-Bissau                    | 108.41   | 140.66   | 153.51  | 167.42   | 185.52   | 207.75   | 237.73   | 271.13   | 309.97   |
| Liberia                          | 250.33   | 330.68   | 385.88  | 403.34   | 379.78   | 463.08   | 573.05   | 632.5    | 712.82   |
| Mali                             | 1025.16  | 1268.7   | 1419.19 | 1550.62  | 1733.61  | 2023.54  | 2369.99  | 2734.63  | 3150.02  |
| Mauritania                       | 177.66   | 226.72   | 259.49  | 293.58   | 329.29   | 369.77   | 422.67   | 473.61   | 514.37   |
| Niger                            | 880.68   | 1107.54  | 1266.96 | 1452.52  | 1714.67  | 2071.4   | 2475.97  | 2953.91  | 3683.59  |
| Nigeria                          | 10224.36 | 12558.84 | 13718.6 | 15068.03 | 17251.5  | 19729.95 | 22774.68 | 26495.19 | 29533.86 |
| Sao Tome and Principe            | 13.2     | 16.39    | 18.06   | 19.71    | 21.73    | 24.25    | 26.94    | 29.48    | 33.3     |
| Senegal                          | 698.53   | 928.18   | 1058.52 | 1228.4   | 1405.43  | 1534.81  | 1803.1   | 2172.96  | 2542     |
| Sierra Leone                     | 412.32   | 498.39   | 543.03  | 598.33   | 616.46   | 614.02   | 730.63   | 895.42   | 1039.95  |
| Togo                             | 351.6    | 460.23   | 535.77  | 631.02   | 700.58   | 765.09   | 868.56   | 971.18   | 1093.73  |
| Eastern Sub-Saharan Africa       | 20039.21 | 26409.5  | 29756.2 | 33760.37 | 37420.56 | 41789.39 | 47698.06 | 54629.61 | 62566.28 |
| Burundi                          | 675.77   | 806.82   | 950.79  | 1063.63  | 1109.41  | 1130.13  | 1295.83  | 1689.48  | 2142.38  |
| Comoros                          | 37.54    | 49.31    | 57.78   | 64.09    | 69.48    | 77.27    | 88.62    | 94.99    | 92.78    |
| Djibouti                         | 32.81    | 66.35    | 87.29   | 111.81   | 135.69   | 147.25   | 158      | 167.03   | 172.42   |
| Eritrea                          | 334.71   | 444.59   | 504.05  | 565.16   | 563.27   | 562.19   | 669.15   | 789.18   | 795.34   |
| Ethiopia                         | 4819.82  | 5986.5   | 6431.22 | 7697.04  | 9045.09  | 10293.54 | 11673.98 | 13163.13 | 15284.55 |
| Kenya                            | 2282.94  | 3281.08  | 3814.25 | 4320.44  | 4720.43  | 5159.62  | 5696.16  | 6227.71  | 6573.53  |
| Madagascar                       | 1325.03  | 1719.32  | 1932.69 | 2174.85  | 2468.32  | 2841.78  | 3186.64  | 3497.25  | 3888.77  |
| Malawi                           | 933.73   | 1208.75  | 1361.33 | 1696.39  | 1912.81  | 2033.14  | 2300.42  | 2659.26  | 3201.34  |
| Mozambique                       | 1617.89  | 2131.26  | 2282.73 | 2274     | 2546.62  | 3088.25  | 3655.52  | 4350.63  | 4966.26  |
| Rwanda                           | 710.54   | 1035.62  | 1261.54 | 1427.25  | 1180.74  | 1291.22  | 1600.98  | 1812.75  | 1872.13  |
| Somalia                          | 508.29   | 790.04   | 958.91  | 937.41   | 926.99   | 952.94   | 1055.79  | 1170.48  | 1318.8   |
| South Sudan                      | 831.6    | 1016.83  | 1177.27 | 1312.37  | 1294.98  | 1406.21  | 1742.69  | 2171.08  | 2860.28  |
| Tanzania                         | 2930.2   | 3909.19  | 4422.74 | 4947.47  | 5639.81  | 6213.78  | 6921.41  | 7950.59  | 9002.88  |
| Uganda                           | 2071     | 2726.21  | 3102.71 | 3576.6   | 4095.82  | 4705.2   | 5510.46  | 6426.84  | 7517.63  |
| Zambia                           | 920.02   | 1226.41  | 1396.41 | 1573.72  | 1691.03  | 1861.85  | 2112.7   | 2424.23  | 2842.24  |
| Central Sub-Saharan Africa       | 5766.29  | 7270.3   | 8232.66 | 9246.5   | 10612.94 | 12263.76 | 14390.35 | 17050.21 | 20794.68 |
| Angola                           | 1191.89  | 1564.85  | 1853.44 | 2133.29  | 2474     | 2898.1   | 3417.08  | 4060.52  | 4906.3   |
| Central African Republic         | 288.58   | 346.49   | 396.99  | 441.14   | 489.84   | 545.36   | 590.47   | 643.28   | 742.05   |
| Congo                            | 234.89   | 307.88   | 353     | 405.14   | 459.48   | 518.11   | 583.92   | 668.56   | 745.16   |
| Democratic Republic of the Congo | 3900.66  | 4907.59  | 5461.16 | 6064.39  | 6964.68  | 8056.65  | 9525     | 11373.2  | 14057.2  |
| Equatorial Guinea                | 47.92    | 30.95    | 46.15   | 65.77    | 70.67    | 71.86    | 75.28    | 84       | 99.13    |
| Gabon                            | 102.35   | 112.83   | 121.92  | 136.77   | 154.27   | 173.69   | 198.61   | 220.65   | 244.84   |

Appendix Table 16B. Under-5 population (in thousands) by location, males, 1970, 1975, 1980, 1985, 1990, 1995, 2000, 2005, 2010, 2016

| Country                                          | 1970      | 1980      | 1985      | 1990      | 1995      | 2000      | 2005      | 2010      | 2016      |
|--------------------------------------------------|-----------|-----------|-----------|-----------|-----------|-----------|-----------|-----------|-----------|
| Global                                           | 251775-19 | 271788-42 | 291148-47 | 307337-84 | 307565-72 | 305149-38 | 310135-37 | 323296-41 | 326098-66 |
| High-income                                      | 34358-52  | 30945-4   | 30777-24  | 30790-88  | 30646-58  | 29927-43  | 29796-56  | 30676-84  | 29580-98  |
| High-income North America                        | 9730-41   | 9336-03   | 10189-59  | 10918-34  | 11211-6   | 10981-12  | 11198-19  | 11542-32  | 11057-9   |
| Canada                                           | 908-29    | 908-44    | 946-7     | 968-86    | 991-69    | 879-98    | 855-27    | 940-21    | 995-93    |
| Greenland                                        | 4-13      | 2-37      | 2-51      | 2-64      | 2-64      | 2-29      | 2-02      | 1-87      | 1-76      |
| United States                                    | 8811-56   | 8420-66   | 9235-38   | 9941-59   | 10211-92  | 10094-08  | 10336-54  | 10596-18  | 10056-59  |
| Australasia                                      | 748-36    | 696-16    | 728-34    | 769-92    | 805-38    | 778-52    | 780-22    | 877-99    | 911-91    |
| Australia                                        | 595-48    | 564-45    | 600-9     | 627-43    | 657-44    | 633-99    | 637-23    | 718-82    | 765-47    |
| New Zealand                                      | 152-87    | 131-71    | 127-44    | 142-5     | 147-94    | 144-53    | 142-99    | 159-17    | 146-44    |
| High-income Asia Pacific                         | 7031-22   | 6537-32   | 5888-97   | 5199-12   | 5052-86   | 4734-63   | 4212-87   | 4074-17   | 3783-3    |
| Brunei                                           | 7-93      | 12-84     | 15-16     | 16-98     | 18-64     | 20-07     | 19-29     | 17-32     | 16-91     |
| Japan                                            | 4593-45   | 4342-58   | 3874-22   | 3358-39   | 3076-5    | 3026-92   | 2883-02   | 2804-46   | 2575-86   |
| Singapore                                        | 118-71    | 98-63     | 106-13    | 125-69    | 124-93    | 115-22    | 96-36     | 92-86     | 91-28     |
| South Korea                                      | 2311-13   | 2083-27   | 1893-46   | 1698-07   | 1832-78   | 1572-43   | 1214-21   | 1159-53   | 1099-25   |
| Western Europe                                   | 15108-58  | 12232-56  | 11718-26  | 11599-3   | 11251-05  | 11028-21  | 11113-28  | 11642-93  | 11268-92  |
| Andorra                                          | 0-35      | 0-63      | 0-9       | 1-16      | 1-46      | 1-58      | 1-5       | 1-61      | 1-58      |
| Austria                                          | 304-67    | 219-19    | 227-48    | 221-31    | 235-47    | 210-14    | 199-73    | 198-51    | 206-29    |
| Belgium                                          | 358-52    | 302-53    | 298-01    | 302-78    | 305-7     | 293-84    | 296-55    | 319-92    | 323-56    |
| Cyprus                                           | 35-84     | 29-11     | 31-24     | 30-45     | 28-93     | 23-02     | 20-94     | 23-47     | 25-46     |
| Denmark                                          | 192-2     | 155-91    | 133-9     | 149-86    | 171-43    | 170-73    | 165-64    | 164-26    | 148-1     |
| Finland                                          | 176-64    | 163-39    | 164-36    | 159-26    | 165-41    | 149-18    | 145-38    | 151-5     | 148-54    |
| France                                           | 2113-55   | 1882-8    | 1956-8    | 1945-82   | 1857-52   | 1895-84   | 1963-77   | 2031-57   | 2008-51   |
| Germany                                          | 3000-53   | 2057-67   | 2106-17   | 2187-02   | 2028-19   | 2003-06   | 1824-47   | 1725-43   | 1762-59   |
| Greece                                           | 375-23    | 364-49    | 327-85    | 271-33    | 264-18    | 264-45    | 270-71    | 297-79    | 243-41    |
| Iceland                                          | 10-76     | 10-72     | 10-6      | 11-14     | 11-49     | 10-64     | 10-6      | 11-98     | 10-92     |
| Ireland                                          | 157-45    | 178-08    | 170-72    | 144-15    | 128-33    | 136-21    | 154-46    | 187-6     | 173-6     |
| Israel                                           | 171-88    | 244-01    | 261-59    | 259-24    | 273-81    | 316-95    | 357-05    | 397-42    | 429-61    |
| Italy                                            | 2368-13   | 1825-56   | 1551-45   | 1447-47   | 1400-6    | 1365-63   | 1398-01   | 1440-79   | 1308-98   |
| Luxembourg                                       | 11-58     | 10-02     | 10-58     | 11-48     | 13-33     | 14-06     | 13-74     | 14-17     | 15-44     |
| Malta                                            | 12-56     | 14-74     | 14-6      | 15-01     | 13-73     | 12-01     | 9-53      | 9-72      | 9-81      |
| Netherlands                                      | 601-45    | 443-29    | 443-33    | 477-12    | 494-82    | 502-81    | 508       | 475-27    | 446-29    |
| Norway                                           | 164-3     | 130-03    | 128-33    | 143-75    | 153-28    | 151-57    | 144-62    | 153-13    | 152-44    |
| Portugal                                         | 471-59    | 414-05    | 359-11    | 306-63    | 285-26    | 289-32    | 285-47    | 263-08    | 217-97    |
| Spain                                            | 1665-67   | 1577-44   | 1242-51   | 1058-07   | 970-36    | 962-08    | 1111-6    | 1265-95   | 1116-16   |
| Sweden                                           | 287-99    | 245-13    | 241-85    | 284-32    | 293-89    | 232-92    | 252-08    | 282-02    | 294-24    |
| Switzerland                                      | 259-64    | 184-9     | 188-26    | 200-25    | 211-89    | 202-67    | 186-21    | 195-11    | 213-58    |
| United Kingdom                                   | 2355-72   | 1768-37   | 1838-53   | 1960-13   | 1930-18   | 1807-95   | 1781-18   | 2020-74   | 2000-1    |
| England                                          | 1914-22   | 1442-91   | 1512-39   | 1635-79   | 1619-17   | 1519-09   | 1508-26   | 1717-25   | 1706-36   |
| East Midlands                                    | 149-58    | 118-84    | 122-01    | 129-33    | 131-46    | 122-36    | 121-38    | 137-08    | 135-84    |
| East of England                                  | 176-13    | 143-58    | 152-9     | 169-28    | 166-32    | 157-32    | 160-12    | 180-83    | 180-48    |
| Greater London                                   | 305-88    | 228-43    | 239-89    | 274-56    | 274-18    | 273-23    | 278-66    | 332-13    | 334-94    |
| North East England                               | 118-43    | 82-44     | 84-6      | 85-02     | 83-47     | 73-82     | 70-35     | 74-14     | 74-14     |
| North West England                               | 318-7     | 222-01    | 230-06    | 239-31    | 231-25    | 207-04    | 200-92    | 227-41    | 216-65    |
| South East England                               | 259-19    | 211-31    | 225-33    | 250-6     | 246-92    | 232-35    | 230-97    | 265-56    | 266-34    |
| South West England                               | 148-49    | 120-91    | 128-2     | 140-6     | 142-54    | 133-31    | 130-63    | 149-87    | 151-86    |
| West Midlands                                    | 233-65    | 165-63    | 172-3     | 182-07    | 177-16    | 166-77    | 164-21    | 184-07    | 182-87    |
| Yorkshire and the Humber                         | 204-17    | 149-76    | 157-1     | 165-02    | 165-86    | 152-88    | 151-03    | 165-15    | 163-23    |
| Northern Ireland                                 | 76-31     | 71-89     | 71-02     | 69-7      | 62-83     | 59-31     | 56-01     | 63-26     | 62-56     |
| Scotland                                         | 236-69    | 164-66    | 165-46    | 164-22    | 159-57    | 144-94    | 135-32    | 148-95    | 145-02    |
| Wales                                            | 128-51    | 88-9      | 89-65     | 90-42     | 88-62     | 84-61     | 81-59     | 91-29     | 86-16     |
| Southern Latin America                           | 1739-95   | 2143-32   | 2252-07   | 2304-2    | 2325-69   | 2404-95   | 2492-01   | 2539-42   | 2558-95   |
| Argentina                                        | 1031-06   | 1480-66   | 1524-36   | 1498-11   | 1484-96   | 1604-97   | 1746-74   | 1810-08   | 1823-83   |
| Chile                                            | 579-33    | 537-69    | 611-19    | 684-45    | 705-19    | 660-35    | 616-68    | 610-07    | 613-48    |
| Uruguay                                          | 129-45    | 124-91    | 116-45    | 121-56    | 135-46    | 139-54    | 128-51    | 119-18    | 121-56    |
| Central Europe, Eastern Europe, and Central Asia | 15244-34  | 16979-16  | 18001-51  | 17897-89  | 14091-39  | 11630-15  | 11770-98  | 13397-96  | 14492-45  |
| Eastern Europe                                   | 7260-13   | 7983-43   | 8691-38   | 8484-92   | 5939-42   | 4804-62   | 5124-44   | 5989-64   | 6657-07   |
| Belarus                                          | 372-05    | 376-09    | 411-32    | 396-81    | 306-11    | 243-36    | 233-17    | 265-35    | 296-31    |
| Estonia                                          | 49-9      | 54-81     | 58-8      | 60-76     | 41-4      | 32-61     | 34-33     | 39-49     | 35-19     |
| Latvia                                           | 82-84     | 86-62     | 98-04     | 101-42    | 70-51     | 49-66     | 52-14     | 54-81     | 54-28     |
| Lithuania                                        | 135-85    | 128-68    | 138-18    | 146-35    | 120-67    | 93-39     | 77-42     | 79-67     | 77-03     |
| Moldova                                          | 184-2     | 206-52    | 222-46    | 217-36    | 165-76    | 119-48    | 109-54    | 116-23    | 115-71    |
| Russia                                           | 4672-73   | 5299-74   | 5838-04   | 5746-56   | 3811-52   | 3195-44   | 3589-37   | 4207-74   | 4813-69   |
| Ukraine                                          | 1762-56   | 1830-97   | 1924-54   | 1815-65   | 1423-47   | 1070-68   | 1028-46   | 1226-35   | 1264-86   |
| Central Europe                                   | 4686-65   | 5268-8    | 4989-27   | 4628-91   | 3770-16   | 3145-76   | 2914-37   | 3043-43   | 2869-99   |
| Albania                                          | 129-46    | 163-85    | 186-94    | 208-3     | 193-79    | 150-42    | 110-08    | 92-86     | 96        |
| Bosnia and Herzegovina                           | 216-12    | 181-53    | 192-33    | 191-96    | 153-69    | 106-71    | 84-77     | 89-59     | 88        |
| Bulgaria                                         | 330-98    | 344-75    | 310-59    | 289-86    | 213-29    | 174-69    | 173-66    | 186-92    | 170-95    |
| Croatia                                          | 162-79    | 165-3     | 165-88    | 150-52    | 127-39    | 116-43    | 101-8     | 106-23    | 101-16    |
| Czech Republic                                   | 345-16    | 440-28    | 354-71    | 335-05    | 289-44    | 226-81    | 241-26    | 290-87    | 279-97    |
| Hungary                                          | 367-4     | 419-85    | 334-59    | 316-69    | 299-14    | 250-71    | 244-39    | 246-23    | 232-8     |
| Macedonia                                        | 103-49    | 99-52     | 96-96     | 87-69     | 84-61     | 73-47     | 62-07     | 59-03     | 57-54     |
| Montenegro                                       | 29-87     | 26-9      | 27-56     | 26-26     | 23-98     | 21-9      | 20-07     | 19-98     | 18-79     |
| Poland                                           | 1267-72   | 1660-96   | 1746-98   | 1479-86   | 1183-45   | 977-82    | 918-37    | 1023-1    | 959-82    |
| Romania                                          | 1106-94   | 1056-63   | 895-66    | 909-4     | 636-87    | 570-56    | 530-88    | 504-2     | 451-1     |
| Serbia                                           | 359-32    | 389-39    | 379-19    | 361-29    | 334-22    | 285-77    | 249-94    | 224-69    | 211-93    |
| Slovakia                                         | 195-55    | 243-46    | 229-46    | 210-83    | 178-98    | 144-25    | 131-69    | 145-9     | 147-6     |
| Slovenia                                         | 71-86     | 76-39     | 68-41     | 61-19     | 51-3      | 46-22     | 45-37     | 53-83     | 54-32     |
| Central Asia                                     | 3297-56   | 3726-92   | 4320-85   | 4784-06   | 4381-81   | 3679-77   | 3732-18   | 4364-89   | 4965-39   |
| Armenia                                          | 145-45    | 182-72    | 212-36    | 207-93    | 153-49    | 105-22    | 98        | 105-59    | 117-43    |
| Azerbaijan                                       | 342-6     | 360-58    | 411-2     | 447-08    | 420-16    | 335-99    | 349-04    | 467-97    | 508-44    |
| Georgia                                          | 210-77    | 229-23    | 236-79    | 236-11    | 182-71    | 134-56    | 138-92    | 163-25    | 174-17    |
| Kazakhstan                                       | 970-27    | 966-78    | 1008-76   | 1002-56   | 810-44    | 626-37    | 661-62    | 866-98    | 1006-77   |
| Kyrgyzstan                                       | 216-55    | 237-83    | 278-56    | 310-78    | 289-82    | 254-85    | 251-38    | 309-84    | 383-26    |
| Mongolia                                         | 114-02    | 132-55    | 152-79    | 164-58    | 141-41    | 119-99    | 117-98    | 147-06    | 188-25    |
| Tajikistan                                       | 235-76    | 289-69    | 366-64    | 446-45    | 432-75    | 387-64    | 388-36    | 453-16    | 580-31    |
| Turkmenistan                                     | 149-37    | 186-87    | 230-83    | 280-09    | 289-35    | 250-13    | 240-98    | 262-46    | 293-9     |
| Uzbekistan                                       | 912-79    | 1140-67   | 1422-92   | 1661-68   | 1465-02   | 1485-89   | 1588-58   | 1712-86   | 1712-86   |
| Latin America and Caribbean                      | 19700-73  | 23958-43  | 25658-36  | 26650-43  | 27110-67  | 27106-78  | 26440-1   | 25920-27  | 25361-68  |
| Central Latin America                            | 8362-3    | 10389-79  | 11323-17  | 12141-73  | 12730     | 12863-58  | 12644-75  | 12285-63  | 11682-08  |
| Colombia                                         | 1536-94   | 1854-42   | 2033-58   | 2184-85   | 2229-67   | 2145-64   | 2088-08   | 2040-58   | 1827-64   |
| Costa Rica                                       | 146-44    | 160-49    | 187-52    | 203-35    | 194-56    | 191-76    | 182-75    | 175-49    | 155-66    |
| El Salvador                                      | 307-34    | 379-76    | 363-01    | 368-92    | 380-46    | 374-13    | 345-59    | 314-11    | 273-21    |
| Guatemala                                        | 510-38    | 630-57    | 697       | 792-42    | 891-01    | 973-43    | 1013-76   | 1008-99   | 1007-44   |
| Honduras                                         | 270-52    | 345-04    | 388-14    | 427-9     | 438-92    | 435-96    | 435-3     | 455-56    | 454-34    |
| Mexico                                           | 4374-87   | 5526-62   | 6021-68   | 6412-74   | 6757-33   | 6821-59   | 6575-73   | 6264-88   | 5969-06   |
| Nicaragua                                        | 156-81    | 210-51    | 247-64    | 284-23    | 323-78    | 353-95    | 357-22    | 343-93    | 311-43    |

Appendix Table 16B. Under-5 population (in thousands) by location, males, 1970, 1975, 1980, 1985, 1990, 1995, 2000, 2005, 2010, 2016

| Country                                | 1970     | 1980     | 1985     | 1990     | 1995     | 2000     | 2005     | 2010     | 2016     |
|----------------------------------------|----------|----------|----------|----------|----------|----------|----------|----------|----------|
| Panama                                 | 126-12   | 136-88   | 139-94   | 146-31   | 159-07   | 169-13   | 166-2    | 176-55   | 177-36   |
| Venezuela                              | 932-86   | 1145-51  | 1244-66  | 1321     | 1355-2   | 1398-01  | 1480-12  | 1505-54  | 1475-93  |
| Andean Latin America                   | 1782-51  | 2372-02  | 2628-17  | 2805-46  | 2894-41  | 2934-83  | 2919-73  | 3073-75  | 3403-99  |
| Bolivia                                | 375      | 489-14   | 534-15   | 557-76   | 587-36   | 626-29   | 644-47   | 660-53   | 698-87   |
| Ecuador                                | 466-77   | 645-1    | 731-51   | 776-65   | 816-39   | 829-63   | 831-91   | 867-95   | 913-48   |
| Peru                                   | 940-74   | 1237-78  | 1362-52  | 1471-05  | 1490-67  | 1478-91  | 1443-35  | 1545-26  | 1791-65  |
| Caribbean                              | 2049-12  | 1984-6   | 2043-87  | 2128-91  | 2099-06  | 2111-16  | 2092-04  | 2059-37  | 2038-2   |
| Antigua and Barbuda                    | 4-84     | 3-82     | 3-24     | 2-83     | 2-72     | 3-08     | 3-31     | 3-21     | 3-09     |
| The Bahamas                            | 11-66    | 13-2     | 14-04    | 14-38    | 15-68    | 14-82    | 14-3     | 15-77    | 16-95    |
| Barbados                               | 13-36    | 11-68    | 11-57    | 10-32    | 8-96     | 7-98     | 8-01     | 8        | 7-52     |
| Belize                                 | 12-08    | 14-11    | 16-63    | 18-54    | 16-74    | 17-34    | 20-21    | 21-9     | 24-08    |
| Bermuda                                | 2-4      | 1-76     | 1-8      | 1-96     | 2-06     | 2-09     | 2-18     | 2-2      | 2-21     |
| Cuba                                   | 651-34   | 393-56   | 404-3    | 458-53   | 395-58   | 378-28   | 343-58   | 310-17   | 307-89   |
| Dominica                               | 7-11     | 4-82     | 4-74     | 4-39     | 4-17     | 3-44     | 3-02     | 2-84     | 2-72     |
| Dominican Republic                     | 336-99   | 459-98   | 460-21   | 457-41   | 510-32   | 527-99   | 523-96   | 508-26   | 481-03   |
| Grenada                                | 7-35     | 6-73     | 7-43     | 7-47     | 6-2      | 5-66     | 5-02     | 4-69     | 4-45     |
| Guyana                                 | 50-68    | 57-74    | 55-38    | 53-46    | 53-64    | 50-41    | 43-18    | 36-43    | 33-31    |
| Haiti                                  | 386-6    | 480-81   | 539-28   | 584-73   | 599-36   | 642-59   | 700-5    | 743-86   | 773-68   |
| Jamaica                                | 178-23   | 162-82   | 165-3    | 172-14   | 171-64   | 164-78   | 153-17   | 142-3    | 141-42   |
| Puerto Rico                            | 182-66   | 194-83   | 166-41   | 160-32   | 147-95   | 135-78   | 120-85   | 111-17   | 107-41   |
| Saint Lucia                            | 11-5     | 11-21    | 11-13    | 10-42    | 9-02     | 7-66     | 6-62     | 5-66     | 4-88     |
| Saint Vincent and the Grenadines       | 8-93     | 9-01     | 8-73     | 7-87     | 6-87     | 5-94     | 5-13     | 4-78     | 4-63     |
| Suriname                               | 32-15    | 26-72    | 28-57    | 29-13    | 29-54    | 29-95    | 29-14    | 27-05    | 23-97    |
| Trinidad and Tobago                    | 72-26    | 73-68    | 86-46    | 72-09    | 53-91    | 49-93    | 46-48    | 45-47    | 35-03    |
| Tropical Latin America                 | 7506-81  | 9212-02  | 9663-14  | 9574-33  | 9197-21  | 8783-58  | 8531-52  | 8237-41  | 8237-41  |
| Brazil                                 | 7312-83  | 8979-71  | 9393-62  | 9251-68  | 9029-34  | 8830-99  | 8430-28  | 8192-85  | 7914-85  |
| Paraguay                               | 193-98   | 232-32   | 269-52   | 322-64   | 357-86   | 366-21   | 353-31   | 338-67   | 322-56   |
| Southeast Asia, East Asia, and Oceania | 87920-7  | 80121-9  | 83238-06 | 86696-89 | 82188-37 | 74804-1  | 69441-43 | 68458-28 | 64523-1  |
| East Asia                              | 65226-64 | 54627    | 56052-51 | 58477-75 | 52795-95 | 44607-91 | 39022-99 | 37542-98 | 34540-72 |
| China                                  | 63149-98 | 52403-78 | 53790-03 | 56130-03 | 50243-8  | 42004-18 | 36714-21 | 35508-02 | 32498-51 |
| North Korea                            | 1414-78  | 1223-64  | 1317     | 1522-8   | 1714-08  | 1827-68  | 1701-87  | 1531-59  | 1512-43  |
| Taiwan (Province of China)             | 961-88   | 999-59   | 945-48   | 824-92   | 838-07   | 776-05   | 606-91   | 503-37   | 529-77   |
| Southeast Asia                         | 22035-96 | 25040-76 | 26697-58 | 27688-38 | 28812-39 | 29563-02 | 29756-43 | 30233-46 | 29253-1  |
| Cambodia                               | 531-68   | 570-4    | 578-16   | 619-52   | 682-53   | 729-87   | 811-02   | 930-2    | 960-91   |
| Indonesia                              | 9062-63  | 9912-93  | 10361-74 | 10444-58 | 11060-76 | 11754-45 | 12062-33 | 12278-86 | 11594-53 |
| Laos                                   | 221-49   | 268-71   | 284-69   | 327-49   | 377-69   | 409-96   | 430-08   | 483-21   | 574-73   |
| Malaysia                               | 852-55   | 971-04   | 1133-52  | 1255-73  | 1350-98  | 1361-96  | 1261-21  | 1297-35  | 1320-53  |
| Maldives                               | 5-35     | 6-57     | 8-16     | 10-03    | 11-57    | 12-25    | 13-45    | 16-68    | 16-39    |
| Mauritius                              | 54-95    | 58-81    | 49-19    | 51-64    | 56-28    | 51-39    | 46-51    | 37-7     | 33-72    |
| Myanmar                                | 1524-1   | 2035-06  | 2266-04  | 2448-82  | 2499-53  | 2543-65  | 2594-23  | 2569-87  | 2355-19  |
| Philippines                            | 2890-09  | 3685-59  | 4129-14  | 4515-65  | 4921-92  | 5251-05  | 5515-06  | 5698-5   | 5940-9   |
| Sri Lanka                              | 849-49   | 970-34   | 1009-82  | 908-32   | 900-31   | 847-34   | 914-93   | 930-39   | 770-36   |
| Seychelles                             | 4-58     | 4-46     | 4-59     | 4-2      | 4-1      | 3-7      | 3-92     | 4-4      | 4-29     |
| Thailand                               | 3183-35  | 3459-91  | 3176-18  | 2975-38  | 2954-7   | 2803-93  | 2384-4   | 1981-42  | 1592-48  |
| Timor-Leste                            | 40-19    | 47-65    | 51-26    | 55-85    | 60-03    | 52-17    | 51-1     | 77-46    | 84-52    |
| Vietnam                                | 2778-33  | 3020-31  | 3613-67  | 4037-09  | 3896-99  | 3705-54  | 3630-43  | 3891-44  | 3971-86  |
| Oceania                                | 358-1    | 454-14   | 487-97   | 530-76   | 580-02   | 633-18   | 662-01   | 681-85   | 729-28   |
| Federated States of Micronesia         | 6-8      | 7-8      | 8-93     | 8-99     | 8-52     | 7-63     | 6-18     | 5-18     | 4-93     |
| Fiji                                   | 42-16    | 51-06    | 51-69    | 46-63    | 40-55    | 36-11    | 32-55    | 29-58    | 26-1     |
| Kiribati                               | 4-85     | 6-34     | 6-78     | 7-21     | 7-36     | 7-13     | 7-1      | 7-15     | 6-95     |
| Marshall Islands                       | 2-01     | 2-82     | 3-19     | 3-7      | 4-2      | 4-68     | 4-7      | 4-95     | 5-06     |
| Papua New Guinea                       | 220-51   | 289-92   | 311-7    | 348-97   | 398-35   | 453-39   | 485-33   | 510-33   | 556-96   |
| Samoa                                  | 13-8     | 14-39    | 14-67    | 14-53    | 14-23    | 14-35    | 14-43    | 14-57    | 14-25    |
| Solomon Islands                        | 14-22    | 20-43    | 23-92    | 26-57    | 30-34    | 35-57    | 39-28    | 42-13    | 42-93    |
| Tonga                                  | 7-33     | 7-59     | 7-82     | 8-23     | 8-2      | 7-68     | 7-72     | 7-71     | 6-88     |
| Vanuatu                                | 8-7      | 11-93    | 13-61    | 14-92    | 16-18    | 17-13    | 18-01    | 19-5     | 20-89    |
| North Africa and Middle East           | 16166-21 | 21339-28 | 23789-03 | 25549-6  | 26009-75 | 26804-12 | 28478-45 | 31224-28 | 32372-05 |
| North Africa and Middle East           | 16166-21 | 21339-28 | 23789-03 | 25549-6  | 26009-75 | 26804-12 | 28478-45 | 31224-28 | 32372-05 |
| Afghanistan                            | 1023-97  | 1265-86  | 1201-56  | 1127-57  | 1337-86  | 1618-63  | 1917-96  | 2169-39  | 2543-76  |
| Algeria                                | 1223-49  | 1573-95  | 1798-14  | 1989-39  | 2158-26  | 2431-12  | 2631-88  | 2600-43  | 2327-19  |
| Bahrain                                | 17-09    | 24-41    | 30-22    | 34-89    | 33-81    | 34-36    | 29-53    | 39-87    | 50-79    |
| Egypt                                  | 2899-25  | 3541-66  | 3859-31  | 4073-58  | 4002-75  | 4111     | 4524-51  | 5136-95  | 5615-49  |
| Iran                                   | 2487-36  | 3742-78  | 4402-08  | 4826-79  | 4056-94  | 3159-03  | 3455-74  | 4127-72  | 4130-68  |
| Iraq                                   | 953-24   | 1276-52  | 1441-2   | 1571-91  | 1729-33  | 1983-1   | 2220-9   | 2976-3   | 3964-09  |
| Jordan                                 | 182-22   | 229-84   | 242-5    | 265-41   | 318-27   | 358-45   | 369-03   | 431-37   | 492-22   |
| Kuwait                                 | 75-11    | 122-21   | 137-34   | 121-5    | 107-33   | 108-08   | 111-47   | 136-47   | 143-73   |
| Lebanon                                | 223-62   | 228-72   | 207-85   | 185-42   | 168-12   | 153-02   | 136-11   | 135-25   | 164-44   |
| Libya                                  | 162-68   | 208-62   | 235-08   | 262-13   | 291-89   | 327-68   | 346-46   | 333-91   | 238-19   |
| Morocco                                | 1152-78  | 1415-39  | 1611-72  | 1762-41  | 1770-43  | 1636-81  | 1478-21  | 1337-21  | 1176-4   |
| Palestine                              | 138-75   | 149-05   | 163-3    | 194-59   | 234-74   | 275-57   | 297-49   | 397-37   | 555-16   |
| Oman                                   | 70-18    | 114-65   | 144-76   | 171-3    | 192-21   | 217-16   | 235-51   | 227-1    | 226-98   |
| Qatar                                  | 8-26     | 15-32    | 21-41    | 26-41    | 28-1     | 26-26    | 31-51    | 44-64    | 63-22    |
| Saudi Arabia                           | 582-08   | 936-38   | 1235-35  | 1503-67  | 1589-61  | 1681-92  | 1708-28  | 1578-45  | 1263-85  |
| Sudan                                  | 768-79   | 994-37   | 1084-22  | 1262-79  | 1564-32  | 1953-43  | 2168-54  | 2207-17  | 2124-47  |
| Syria                                  | 598-26   | 829-86   | 946-03   | 1055-79  | 1153-66  | 1245-13  | 1244-19  | 1283-78  | 907-79   |
| Tunisia                                | 391-5    | 487-85   | 542-02   | 551-93   | 505-94   | 439-68   | 417-03   | 452-99   | 427-01   |
| Turkey                                 | 2634-22  | 3360-5   | 3463-39  | 3303-4   | 3201-07  | 3254-92  | 3160-5   | 3186-65  | 3149-73  |
| United Arab Emirates                   | 22-62    | 72-26    | 117-97   | 139-81   | 157-09   | 182-14   | 222-28   | 353-11   | 416-41   |
| Yemen                                  | 544-15   | 737-6    | 888-91   | 1103-13  | 1390-99  | 1589-21  | 1748-65  | 2043-18  | 2365-01  |
| South Asia                             | 52826-71 | 65768-17 | 72922-57 | 78255-06 | 81079-03 | 82783-9  | 84473-89 | 85280-93 | 80439-84 |
| South Asia                             | 52826-71 | 65768-17 | 72922-57 | 78255-06 | 81079-03 | 82783-9  | 84473-89 | 85280-93 | 80439-84 |
| Bangladesh                             | 5199-71  | 5756-59  | 6594-51  | 7462-07  | 7740-27  | 7642-46  | 7787-01  | 7818-23  | 7323-43  |
| Bhutan                                 | 25-44    | 34-38    | 38-2     | 43-78    | 45-29    | 45-18    | 48-02    | 46-44    | 39-76    |
| India                                  | 41234-84 | 51613-8  | 56183-26 | 59318-81 | 61700-74 | 63623-22 | 65205-6  | 64780-85 | 59014-32 |
| Nepal                                  | 945-51   | 1218-65  | 1381-32  | 1565-9   | 1713-98  | 1833-31  | 1808-37  | 1779-04  | 2056-23  |
| Pakistan                               | 5421-21  | 7144-75  | 8725-27  | 9864-49  | 9878-75  | 9639-74  | 9624-89  | 10856-38 | 12006-09 |
| Sub-Saharan Africa                     | 25557-98 | 32676-07 | 36761-71 | 41497-09 | 46439-93 | 52092-89 | 59733-97 | 68937-86 | 79328-56 |
| Southern Sub-Saharan Africa            | 1997-93  | 2567-79  | 2917-23  | 3296-47  | 3518-3   | 3626-17  | 3834-62  | 4068-56  | 4342-47  |
| Botswana                               | 56-57    | 75-56    | 86-73    | 95-29    | 101-25   | 107-56   | 113-95   | 125-45   | 134-04   |
| Lesotho                                | 84-86    | 98-5     | 105-49   | 109-73   | 113-45   | 118-67   | 120-2    | 124-22   | 129-93   |
| Namibia                                | 67-37    | 82-46    | 90-11    | 111-87   | 135-44   | 143-64   | 143-73   | 147-14   | 168-18   |
| South Africa                           | 1330-38  | 1703-32  | 1909-35  | 2106-17  | 2225-52  | 2285-93  | 2428-05  | 2490-2   | 2532-47  |
| Swaziland                              | 35-48    | 47-13    | 54-46    | 65-89    | 72-56    | 75-32    | 80-86    | 93-44    | 105-28   |
| Zimbabwe                               | 423-28   | 560-83   | 671-09   | 807-53   | 870-08   | 895-04   | 947-83   | 1088-12  | 1272-58  |
| Western Sub-Saharan Africa             | 10555-14 | 13126-84 | 14691-05 | 16510-34 | 18693-78 | 21213-29 | 24584-16 | 28691-27 | 32861-21 |
| Benin                                  | 252-4    | 324-92   | 377-26   | 431-07   | 499-48   | 582-2    | 689-1    | 814-43   | 970-19   |

Appendix Table 16B. Under-5 population (in thousands) by location, males, 1970, 1975, 1980, 1985, 1990, 1995, 2000, 2005, 2010, 2016

| Country                          | 1970     | 1980     | 1985     | 1990     | 1995     | 2000     | 2005     | 2010     | 2016     |
|----------------------------------|----------|----------|----------|----------|----------|----------|----------|----------|----------|
| Burkina Faso                     | 518.22   | 625.9    | 708.7    | 820.25   | 928.49   | 1056.1   | 1249.23  | 1460.47  | 1625.07  |
| Cameroon                         | 628.52   | 765.12   | 874.24   | 1010.1   | 1134.91  | 1256.54  | 1432.28  | 1669.9   | 1955.95  |
| Cape Verde                       | 19.13    | 21.14    | 25.42    | 29.05    | 30.61    | 32.59    | 35.06    | 37.8     | 38.01    |
| Chad                             | 329.68   | 420.37   | 460.84   | 528.74   | 615.36   | 716.33   | 861.86   | 1055.16  | 1331.67  |
| Cote d'Ivoire                    | 439.89   | 669.17   | 846.82   | 999.83   | 1088.58  | 1220.48  | 1382.41  | 1532.57  | 1788.23  |
| The Gambia                       | 51.53    | 67.55    | 77.05    | 92.25    | 111.47   | 129.52   | 147.05   | 163.92   | 185.45   |
| Ghana                            | 817.58   | 952.51   | 1072.1   | 1240.05  | 1315.9   | 1365.89  | 1567.78  | 1906.81  | 2218.04  |
| Guinea                           | 329.84   | 369.87   | 402.03   | 462.28   | 581.35   | 699.13   | 779.03   | 876.4    | 1022.78  |
| Guinea-Bissau                    | 54.25    | 70.56    | 77.04    | 83.93    | 93.06    | 104.29   | 119.49   | 136.43   | 156.21   |
| Liberia                          | 125.62   | 167      | 195.41   | 204.86   | 193.39   | 235.98   | 292.45   | 322.93   | 364.15   |
| Mali                             | 522.35   | 645.94   | 721.62   | 787.08   | 879.12   | 1026     | 1201.71  | 1386.86  | 1598.58  |
| Mauritania                       | 90.15    | 115.18   | 131.87   | 149.24   | 167.44   | 188.07   | 215.05   | 241.09   | 262.04   |
| Niger                            | 449.58   | 565.36   | 646.66   | 741      | 874.18   | 1055.81  | 1262.05  | 1505.81  | 1877.85  |
| Nigeria                          | 5187.5   | 6391.32  | 6991.82  | 7686.26  | 8801.31  | 10067.24 | 11625.11 | 13532.81 | 15094.38 |
| Sao Tome and Principe            | 6.69     | 8.3      | 9.15     | 9.97     | 10.98    | 12.24    | 13.59    | 14.88    | 16.82    |
| Senegal                          | 352.31   | 468.58   | 534.6    | 620.55   | 710      | 775.21   | 910.99   | 1098.6   | 1286.5   |
| Sierra Leone                     | 204.57   | 247.99   | 270.42   | 298.22   | 307.6    | 306.77   | 365.18   | 448.05   | 521.02   |
| Togo                             | 174.96   | 229.74   | 267.68   | 315.34   | 350.27   | 382.66   | 434.61   | 486.25   | 548.2    |
| Eastern Sub-Saharan Africa       | 10091.02 | 13306.44 | 14991.73 | 17016.88 | 18866.81 | 21061.76 | 24053.48 | 27573.71 | 31627.4  |
| Burundi                          | 340.41   | 406.47   | 479.21   | 536.07   | 559.1    | 568.84   | 652.5    | 851.55   | 1080.42  |
| Comoros                          | 19.03    | 25.03    | 29.34    | 32.56    | 35.33    | 39.34    | 45.16    | 48.44    | 47.34    |
| Djibouti                         | 16.61    | 33.62    | 44.22    | 56.65    | 68.74    | 74.59    | 80.07    | 84.68    | 87.49    |
| Eritrea                          | 168.52   | 224.84   | 255.28   | 286.7    | 286.23   | 286.38   | 340.86   | 402.27   | 405.83   |
| Ethiopia                         | 2428.36  | 3018.61  | 3240.97  | 3886.98  | 4566.93  | 5198.84  | 5899.66  | 6659.99  | 7749.2   |
| Kenya                            | 1155.32  | 1659.22  | 1927.95  | 2182.92  | 2383.29  | 2603.73  | 2875.35  | 3145.99  | 3323.32  |
| Madagascar                       | 662.52   | 859.96   | 966.54   | 1087.92  | 1235.5   | 1423.55  | 1600.26  | 1761     | 1962.73  |
| Malawi                           | 466.83   | 605.53   | 682.37   | 850.35   | 958.97   | 1019.52  | 1154.25  | 1335.84  | 1616.06  |
| Mozambique                       | 813.5    | 1072.92  | 1148.83  | 1145.71  | 1282.86  | 1556.04  | 1842.98  | 2194.49  | 2506.35  |
| Rwanda                           | 353.27   | 515.16   | 628.57   | 711.27   | 595.83   | 643.2    | 798.7    | 906.13   | 940.62   |
| Somalia                          | 255.84   | 397.91   | 483.08   | 472.48   | 467.19   | 480.22   | 532.3    | 590.35   | 665.6    |
| South Sudan                      | 423.95   | 517.89   | 599.41   | 668.03   | 658.45   | 713.74   | 883.88   | 1100.83  | 1450.33  |
| Tanzania                         | 1482.49  | 1977.72  | 2237.09  | 2501.82  | 2850.71  | 3139.57  | 3496.66  | 4016.84  | 4550.12  |
| Uganda                           | 1037.27  | 1367.41  | 1557.51  | 1795.44  | 2056.45  | 2364.84  | 2772.73  | 3236.65  | 3790.83  |
| Zambia                           | 463.41   | 618.49   | 704.02   | 792.79   | 851.08   | 936.66   | 1063.08  | 1220.94  | 1433.43  |
| Central Sub-Saharan Africa       | 2913.88  | 3675     | 4161.69  | 4673.39  | 5361.04  | 6191.67  | 7261.7   | 8604.32  | 10497.48 |
| Angola                           | 607.41   | 796.7    | 943.16   | 1084.78  | 1256.91  | 1468.72  | 1727.01  | 2050.2   | 2477.52  |
| Central African Republic         | 145.53   | 174.76   | 200.15   | 222.16   | 246.36   | 273.94   | 296.57   | 323.17   | 372.96   |
| Congo                            | 119.74   | 156.56   | 179.3    | 205.66   | 233.22   | 262.91   | 295.26   | 337.72   | 376.33   |
| Democratic Republic of the Congo | 1965.35  | 2474.49  | 2754.22  | 3058.56  | 3511.07  | 4062.24  | 4804.7   | 5739.54  | 7097.06  |
| Equatorial Guinea                | 24.1     | 15.61    | 23.27    | 33.15    | 35.59    | 36.2     | 37.95    | 42.36    | 50.02    |
| Gabon                            | 51.76    | 56.88    | 61.6     | 69.08    | 77.88    | 87.65    | 100.21   | 111.33   | 123.59   |

Appendix Table 16C. Under-5 population (in thousands) by location, females, 1970, 1975, 1980, 1985, 1990, 1995, 2000, 2005, 2010, 2016

| Country                                          | 1970      | 1980      | 1985     | 1990      | 1995     | 2000      | 2005      | 2010      | 2016      |
|--------------------------------------------------|-----------|-----------|----------|-----------|----------|-----------|-----------|-----------|-----------|
| Global                                           | 239763.62 | 259024.76 | 277152.4 | 291129.85 | 289198.6 | 286083.26 | 290086.32 | 302992.36 | 305972.32 |
| High-income                                      | 32739.4   | 29432.17  | 29254.1  | 29189.77  | 29044.65 | 28424.44  | 28313.27  | 29172.82  | 28130.28  |
| High-income North America                        | 9300.35   | 8902.29   | 9717.41  | 10421.26  | 10702.38 | 10488.58  | 10695.92  | 11023.31  | 10555.57  |
| Canada                                           | 865.25    | 862.8     | 898.74   | 922.21    | 940.59   | 935.79    | 912.28    | 893.38    | 943.79    |
| Greenland                                        | 3.99      | 2.26      | 2.38     | 2.59      | 2.57     | 2.22      | 1.96      | 1.77      | 1.65      |
| United States                                    | 8424.87   | 8032.85   | 8811.5   | 9491.3    | 9754.04  | 9645.97   | 9877.48   | 10124.22  | 9606.73   |
| Australasia                                      | 713.69    | 661.98    | 692.24   | 732.24    | 763.19   | 739.28    | 741.24    | 832.22    | 864.31    |
| Australia                                        | 567.34    | 536.32    | 571.12   | 596.48    | 623.68   | 602.21    | 604.61    | 681.26    | 725.06    |
| New Zealand                                      | 146.35    | 125.66    | 121.13   | 135.76    | 139.51   | 137.07    | 136.62    | 150.96    | 139.26    |
| High-income Asia Pacific                         | 6664.2    | 6181.07   | 5552.72  | 4809.63   | 4666.27  | 4424.86   | 3947.5    | 3844.34   | 3569.32   |
| Brunei                                           | 7.61      | 12.23     | 14.42    | 16.13     | 17.7     | 19.06     | 18.31     | 16.45     | 16.06     |
| Japan                                            | 4367.9    | 4121.77   | 3674.28  | 3183.53   | 2915.87  | 2868.26   | 2731.39   | 2656.7    | 2439.94   |
| Singapore                                        | 113.28    | 91.89     | 98.29    | 117.17    | 117.1    | 106.67    | 90.17     | 86.97     | 85.59     |
| South Korea                                      | 2175.41   | 1955.18   | 1765.73  | 1492.8    | 1615.6   | 1430.87   | 1107.63   | 1084.22   | 1027.73   |
| Western Europe                                   | 14368.88  | 11607.57  | 11112.72 | 10999.39  | 10666.62 | 10451.27  | 10526.28  | 11026.32  | 10676.54  |
| Andorra                                          | 0.33      | 0.6       | 0.84     | 1.08      | 1.46     | 1.46      | 1.45      | 1.52      | 1.48      |
| Austria                                          | 290.92    | 208.74    | 216.35   | 210.26    | 223.56   | 199.4     | 189.49    | 188.31    | 195.66    |
| Belgium                                          | 340.76    | 286.87    | 282.82   | 291.73    | 281.95   | 282.73    | 282.73    | 304.98    | 308.41    |
| Cyprus                                           | 34.74     | 27.73     | 29.69    | 28.89     | 27.43    | 21.85     | 19.62     | 22.09     | 24.17     |
| Denmark                                          | 182.13    | 147.91    | 127.7    | 141.75    | 162.73   | 161.9     | 157.54    | 155.79    | 140.3     |
| Finland                                          | 169.38    | 155.99    | 157.09   | 152.44    | 159.15   | 142.81    | 138.64    | 145.14    | 141.92    |
| France                                           | 2018.58   | 1795.48   | 1865.01  | 1853.87   | 1768.94  | 1804.21   | 1868.54   | 1932.66   | 1910.52   |
| Germany                                          | 2853.92   | 1952.84   | 1996.55  | 2071.68   | 1920.04  | 1895.32   | 1726.01   | 1632.09   | 1666.99   |
| Greece                                           | 352.69    | 341.64    | 305.93   | 254.83    | 248.02   | 249.19    | 254.09    | 279.11    | 229.14    |
| Iceland                                          | 10.25     | 10.21     | 10.03    | 10.55     | 10.89    | 10.22     | 10.16     | 11.42     | 10.53     |
| Ireland                                          | 147.89    | 166.96    | 159.9    | 134.97    | 120.11   | 127.45    | 144.49    | 175.43    | 162.77    |
| Israel                                           | 162.71    | 232.41    | 248.27   | 246.87    | 259.55   | 300.01    | 339.03    | 377.62    | 408.14    |
| Italy                                            | 2242.52   | 1724.4    | 1463.52  | 1364.36   | 1319.53  | 1285.92   | 1316.04   | 1356.19   | 1232.01   |
| Luxembourg                                       | 11.14     | 9.59      | 10.15    | 10.94     | 12.74    | 13.37     | 13.1      | 13.46     | 14.77     |
| Malta                                            | 11.92     | 13.96     | 13.82    | 14.19     | 12.98    | 11.35     | 9         | 9.18      | 9.26      |
| Netherlands                                      | 570.74    | 420.11    | 419.99   | 451.84    | 468.45   | 475.84    | 480.69    | 449.72    | 423.55    |
| Norway                                           | 155.25    | 123.23    | 121.62   | 136.69    | 144.71   | 143.5     | 137.65    | 145.16    | 144.72    |
| Portugal                                         | 450.76    | 393.57    | 340.58   | 290.31    | 269.72   | 273.34    | 269.56    | 248.34    | 205.74    |
| Spain                                            | 1577.16   | 1488.66   | 1171.03  | 996.45    | 913.4    | 905.09    | 1045.52   | 1190.49   | 1049.46   |
| Sweden                                           | 272.15    | 232.13    | 228.71   | 269.2     | 279.1    | 220.63    | 237.76    | 266.17    | 277.7     |
| Switzerland                                      | 248.04    | 176.24    | 179.33   | 190.7     | 201.71   | 192.86    | 177.17    | 185.59    | 203.15    |
| United Kingdom                                   | 2253.08   | 1688.47   | 1754.07  | 1869.35   | 1839.6   | 1722.61   | 1696.7    | 1924.62   | 1904.61   |
| England                                          | 1832.58   | 1377.7    | 1442.18  | 1561.32   | 1541.66  | 1447.88   | 1437.62   | 1635.45   | 1624.17   |
| East Midlands                                    | 143.24    | 113.51    | 116.36   | 123.14    | 124.41   | 116.24    | 114.75    | 130.68    | 132.08    |
| East of England                                  | 168.45    | 136.95    | 145.7    | 161.21    | 158.13   | 149.33    | 151.76    | 171.76    | 178.69    |
| Greater London                                   | 294.82    | 219.61    | 230.16   | 263.34    | 262.44   | 260.88    | 268.58    | 317.31    | 317.55    |
| North East England                               | 113.58    | 78.89     | 80.8     | 81.23     | 79.27    | 70.42     | 66.7      | 72.23     | 70.25     |
| North West England                               | 302.71    | 210.37    | 219.4    | 228.53    | 219.11   | 197.98    | 191.42    | 215.59    | 206.97    |
| South East England                               | 245.6     | 199.7     | 213.58   | 239.52    | 235.22   | 221.51    | 219.09    | 252.14    | 247.64    |
| South West England                               | 141.95    | 115.28    | 122.02   | 133.39    | 135.37   | 126.91    | 124.32    | 143.1     | 143.32    |
| West Midlands                                    | 224.91    | 159.03    | 164.04   | 172.97    | 169.49   | 158.14    | 156.69    | 175.43    | 169.61    |
| Yorkshire and the Humber                         | 197.32    | 144.36    | 150.13   | 158       | 158.21   | 146.46    | 144.31    | 157.21    | 158.06    |
| Northern Ireland                                 | 72.17     | 68.99     | 67.64    | 65.93     | 60.06    | 56.42     | 53.14     | 60.07     | 57.21     |
| Scotland                                         | 224.34    | 156.23    | 158.3    | 156.15    | 152.92   | 137.89    | 128.9     | 140.53    | 140.53    |
| Wales                                            | 123.99    | 85.55     | 85.95    | 85.95     | 84.95    | 80.41     | 77.03     | 86.67     | 82.71     |
| Southern Latin America                           | 1692.27   | 2079.26   | 2179.01  | 2227.25   | 2246.19  | 2320.46   | 2402.34   | 2446.63   | 2464.53   |
| Argentina                                        | 1002.26   | 1437.11   | 1476.43  | 1449.9    | 1436.44  | 1550.68   | 1685.49   | 1745.25   | 1757.81   |
| Chile                                            | 565.24    | 521.88    | 590.74   | 660.79    | 679.98   | 636.23    | 593.96    | 587.49    | 590.62    |
| Uruguay                                          | 124.65    | 120.2     | 111.78   | 116.49    | 129.69   | 133.45    | 122.81    | 113.81    | 116.03    |
| Central Europe, Eastern Europe, and Central Asia | 14606.52  | 16252.62  | 17223.02 | 17086.75  | 13398.94 | 11021.79  | 11133.95  | 12666.52  | 13700.67  |
| Eastern Europe                                   | 6948.97   | 7650.79   | 8322.17  | 8090.39   | 5640.88  | 4549.95   | 4844.86   | 5670.89   | 6301.64   |
| Belarus                                          | 355.18    | 359.58    | 393.04   | 376.2     | 288.73   | 229.29    | 220.36    | 250.15    | 279.59    |
| Estonia                                          | 47.67     | 52.15     | 56.16    | 57.69     | 39.24    | 30.68     | 32.52     | 37.18     | 33.34     |
| Latvia                                           | 78.83     | 82.37     | 93.37    | 96.53     | 67.4     | 46.76     | 49.73     | 52.93     | 51.52     |
| Lithuania                                        | 130.44    | 123.47    | 131.73   | 138.8     | 114.81   | 88.1      | 73.44     | 76.14     | 73.27     |
| Moldova                                          | 173.95    | 195.06    | 210.1    | 205.17    | 156.75   | 113.38    | 103.04    | 109.94    | 109.19    |
| Russia                                           | 4480.94   | 5083.95   | 5599.71  | 5488.53   | 3622.78  | 3029.22   | 3393.87   | 3986.88   | 4563.61   |
| Ukraine                                          | 1681.95   | 1754.22   | 1838.05  | 1727.47   | 1351.17  | 1012.53   | 971.9     | 1157.66   | 1191.11   |
| Central Europe                                   | 4467.99   | 5013.23   | 4742.56  | 4396.99   | 3579.21  | 2982.26   | 2761.05   | 2882.94   | 2717.29   |
| Albania                                          | 120.85    | 153.52    | 175.26   | 195.41    | 181.67   | 139.96    | 102.44    | 86.4      | 89.3      |
| Bosnia and Herzegovina                           | 205.07    | 171.74    | 181.75   | 181.13    | 144.68   | 100.5     | 79.76     | 84.25     | 82.89     |
| Bulgaria                                         | 313.81    | 326.77    | 294.12   | 274.68    | 203.49   | 165.68    | 163.98    | 177.37    | 161.68    |
| Croatia                                          | 155.07    | 157.06    | 157.43   | 142.62    | 120.55   | 110.15    | 96.25     | 100.4     | 95.59     |
| Czech Republic                                   | 328.39    | 418.47    | 336.77   | 317.65    | 274.26   | 214.68    | 228.27    | 275.15    | 264.8     |
| Hungary                                          | 349.62    | 398.71    | 317.23   | 299.95    | 283.02   | 237.01    | 230.88    | 232.52    | 219.82    |
| Macedonia                                        | 98.73     | 94.9      | 92.47    | 83.6      | 80.61    | 69.91     | 59.01     | 56.11     | 54.69     |
| Montenegro                                       | 27.77     | 24.99     | 25.59    | 24.39     | 22.26    | 20.35     | 18.64     | 18.55     | 17.63     |
| Poland                                           | 1212.72   | 1584.03   | 1663.53  | 1407.88   | 1124.65  | 927.94    | 870.95    | 969.91    | 909.56    |
| Romania                                          | 1056.1    | 1004.72   | 851.18   | 864.88    | 605.36   | 542.04    | 503.94    | 478       | 427.28    |
| Serbia                                           | 343.69    | 372.1     | 362.37   | 345.01    | 318.92   | 272.46    | 238.22    | 214.04    | 201.79    |
| Slovakia                                         | 187.55    | 233.41    | 219.7    | 201.57    | 170.97   | 137.68    | 125.63    | 139.14    | 140.71    |
| Slovenia                                         | 68.62     | 72.81     | 65.17    | 58.23     | 48.76    | 43.91     | 43.07     | 51.09     | 51.55     |
| Central Asia                                     | 3189.56   | 3588.6    | 4158.29  | 4599.37   | 4178.85  | 3489.58   | 3528.04   | 4112.69   | 4681.74   |
| Armenia                                          | 141.29    | 177.59    | 206.02   | 198.87    | 143.95   | 92.34     | 84.47     | 92.46     | 103.94    |
| Azerbaijan                                       | 333.7     | 347.99    | 397.15   | 430.71    | 398.4    | 303.11    | 303.9     | 407.86    | 448.29    |
| Georgia                                          | 201.29    | 217.18    | 223.63   | 222.62    | 171.83   | 123.03    | 126.91    | 148.76    | 159.03    |
| Kazakhstan                                       | 920.22    | 915.79    | 955.14   | 953.09    | 771.78   | 595.44    | 630.46    | 822.39    | 952.37    |
| Kyrgyzstan                                       | 215.76    | 232       | 270.19   | 301.21    | 278.74   | 242.21    | 241.19    | 294.36    | 364.41    |
| Mongolia                                         | 112.99    | 130.88    | 150.69   | 162.14    | 139.26   | 118.09    | 115.88    | 144.08    | 184.06    |
| Tajikistan                                       | 232.26    | 282.95    | 356.86   | 433.95    | 420.29   | 376.05    | 375.43    | 436.6     | 558.19    |
| Turkmenistan                                     | 146.15    | 181.94    | 224.44   | 272.18    | 281.21   | 243.12    | 233.84    | 254.06    | 283.64    |
| Uzbekistan                                       | 885.9     | 1102.28   | 1374.18  | 1624.6    | 1573.39  | 1396.19   | 1415.97   | 1512.13   | 1627.82   |
| Latin America and Caribbean                      | 18954.07  | 23036.77  | 24651.8  | 25586.6   | 26007.4  | 25973.21  | 25313.12  | 24827.32  | 24243.32  |
| Central Latin America                            | 8057.08   | 9997.05   | 10876.74 | 11646.75  | 12199.45 | 12317.73  | 12099.05  | 11747.23  | 11161.77  |
| Colombia                                         | 1477.39   | 1779.16   | 1947.61  | 2090.45   | 2133.22  | 2052.63   | 1996.95   | 1950.74   | 1745.68   |
| Costa Rica                                       | 141       | 153.87    | 179.5    | 194.5     | 185.98   | 183.2     | 174.53    | 167.53    | 148.54    |
| El Salvador                                      | 298.95    | 366.99    | 349.18   | 354.17    | 364.72   | 358.09    | 330.41    | 299.98    | 260.72    |
| Guatemala                                        | 491.59    | 607.32    | 670.34   | 761.5     | 855.69   | 934.46    | 972.37    | 966.66    | 964.28    |
| Honduras                                         | 260.26    | 331.46    | 372.61   | 410.38    | 420.53   | 417.19    | 416.3     | 435.49    | 462.77    |
| Mexico                                           | 4219.99   | 5324.56   | 5791.99  | 6157.38   | 6477.68  | 6532.66   | 6292.29   | 5989.99   | 5702.36   |
| Nicaragua                                        | 152.43    | 203.01    | 238.37   | 273.3     | 311.32   | 339.69    | 342.3     | 329.21    | 297.71    |

Appendix Table 16C. Under-5 population (in thousands) by location, females, 1970, 1975, 1980, 1985, 1990, 1995, 2000, 2005, 2010, 2016

| Country                                | 1970     | 1980     | 1985     | 1990     | 1995     | 2000     | 2005     | 2010     | 2016     |
|----------------------------------------|----------|----------|----------|----------|----------|----------|----------|----------|----------|
| Panama                                 | 120.93   | 131.01   | 133.87   | 139.91   | 152.11   | 161.66   | 158.81   | 168.65   | 169.36   |
| Venezuela                              | 894.54   | 1099.67  | 1193.26  | 1265.15  | 1298.19  | 1338.13  | 1415.09  | 1438.99  | 1410.34  |
| Andean Latin America                   | 1718.28  | 2280.57  | 2527.39  | 2698.64  | 2781.27  | 2816.9   | 2800.31  | 2945.98  | 3258.75  |
| Bolivia                                | 363.88   | 471.79   | 514.36   | 536.71   | 565.07   | 602.15   | 619.13   | 633.98   | 669.73   |
| Ecuador                                | 446.61   | 619.1    | 703.07   | 747.6    | 784.57   | 797.05   | 798.95   | 832.53   | 875.02   |
| Peru                                   | 907.79   | 1189.69  | 1309.96  | 1414.33  | 1431.63  | 1417.71  | 1382.23  | 1479.47  | 1714     |
| Caribbean                              | 1974.61  | 1911.68  | 1966.8   | 2044.39  | 2014.87  | 2024.68  | 2005.51  | 1974.08  | 1951.34  |
| Antigua and Barbuda                    | 4.73     | 3.73     | 3.17     | 2.76     | 2.66     | 3.02     | 3.24     | 3.14     | 3.02     |
| The Bahamas                            | 11.13    | 12.53    | 13.33    | 13.65    | 14.87    | 14.05    | 13.54    | 14.94    | 16.05    |
| Barbados                               | 13.02    | 11.34    | 11.22    | 10       | 8.68     | 7.72     | 7.75     | 7.74     | 7.27     |
| Belize                                 | 12.18    | 14.06    | 16.51    | 18.28    | 16.43    | 16.94    | 19.7     | 21.32    | 23.43    |
| Bermuda                                | 2.38     | 1.74     | 1.79     | 1.94     | 2.04     | 2.12     | 2.15     | 2.16     | 2.18     |
| Cuba                                   | 620.88   | 374.37   | 384.33   | 435.47   | 375.35   | 358.68   | 325.56   | 293.81   | 291.63   |
| Dominica                               | 6.82     | 4.6      | 4.53     | 4.19     | 3.98     | 3.28     | 2.88     | 2.71     | 2.59     |
| Dominican Republic                     | 325.92   | 443.86   | 443.41   | 439.94   | 489.91   | 505.97   | 501.63   | 486.43   | 460.17   |
| Grenada                                | 7.04     | 6.44     | 7.1      | 7.13     | 5.91     | 5.4      | 4.79     | 4.48     | 4.25     |
| Guyana                                 | 49.2     | 55.92    | 53.55    | 51.67    | 51.8     | 48.61    | 41.6     | 35.07    | 32.03    |
| Haiti                                  | 379.52   | 468.9    | 524.34   | 567.1    | 580.32   | 621.2    | 676.42   | 718.16   | 745.69   |
| Jamaica                                | 171.38   | 156.22   | 158.45   | 164.93   | 164.37   | 157.71   | 146.55   | 136.12   | 135.25   |
| Puerto Rico                            | 174.74   | 185.81   | 158.53   | 152.59   | 140.83   | 129.23   | 115      | 105.78   | 102.16   |
| Saint Lucia                            | 11.27    | 10.96    | 10.87    | 10.16    | 8.78     | 7.45     | 6.44     | 5.51     | 4.75     |
| Saint Vincent and the Grenadines       | 8.72     | 8.8      | 8.51     | 7.68     | 6.7      | 5.79     | 5        | 4.66     | 4.52     |
| Suriname                               | 30.04    | 24.95    | 26.66    | 27.18    | 27.56    | 27.95    | 27.18    | 25.24    | 22.48    |
| Trinidad and Tobago                    | 70.17    | 71.34    | 83.59    | 69.68    | 52.12    | 48.28    | 44.94    | 43.95    | 33.86    |
| Tropical Latin America                 | 7204.1   | 8847.46  | 9280.88  | 9196.83  | 9011.8   | 8813.9   | 8408.26  | 8160.37  | 7871.46  |
| Brazil                                 | 7018.23  | 8624.65  | 9022.28  | 8887.29  | 8668.55  | 8462.93  | 8069.92  | 7836.39  | 7563.26  |
| Paraguay                               | 185.87   | 222.81   | 258.59   | 309.54   | 343.26   | 350.97   | 338.34   | 323.98   | 308.2    |
| Southeast Asia, East Asia, and Oceania | 83422.28 | 76097.04 | 78930.39 | 81151.87 | 75753.21 | 68432.68 | 63080.75 | 61829.31 | 58548.57 |
| East Asia                              | 61688.06 | 51467.86 | 52699.07 | 53948.17 | 47499.83 | 39472.8  | 33965.17 | 32415.18 | 30090.26 |
| China                                  | 59426.96 | 49358.12 | 50553.38 | 51728.5  | 45091.96 | 37003.3  | 31779.64 | 30488.98 | 28159.41 |
| North Korea                            | 1355.86  | 1171.24  | 1259.97  | 1456.48  | 1640.2   | 1756     | 1631.67  | 1465.24  | 1446.56  |
| Taiwan (Province of China)             | 905.24   | 938.5    | 885.72   | 763.19   | 767.67   | 713.5    | 553.87   | 460.96   | 484.29   |
| Southeast Asia                         | 21394.93 | 24200.69 | 25771.64 | 26704.48 | 27708.53 | 28365.22 | 28494.31 | 28774.91 | 27774.67 |
| Cambodia                               | 527.27   | 562.03   | 565.11   | 611.09   | 671.18   | 716.11   | 792.95   | 884.94   | 922.9    |
| Indonesia                              | 8836.02  | 9594.46  | 10024.65 | 10101.19 | 10688.65 | 11344.95 | 11622.9  | 11809.4  | 11131.9  |
| Laos                                   | 224.55   | 268.28   | 282.22   | 322.89   | 370.92   | 401.11   | 419.12   | 468.95   | 555.59   |
| Malaysia                               | 813.34   | 922.44   | 1074.6   | 1188.81  | 1277.71  | 1287.31  | 1191.47  | 1225.49  | 1247.13  |
| Maldives                               | 5.21     | 6.31     | 7.82     | 9.58     | 10.79    | 11.6     | 12.76    | 15.65    | 14.95    |
| Mauritius                              | 53.32    | 56.92    | 47.54    | 49.87    | 54.3     | 49.55    | 44.8     | 36.29    | 32.44    |
| Myanmar                                | 1512.24  | 2007.54  | 2232.96  | 2410.34  | 2458.72  | 2500.19  | 2547.23  | 2518.69  | 2302.37  |
| Philippines                            | 2770.78  | 3524.26  | 3945.58  | 4307.49  | 4685.97  | 4991.05  | 5235.48  | 5402.48  | 5626.39  |
| Sri Lanka                              | 827.21   | 940.35   | 972.4    | 873.72   | 869.64   | 813.85   | 877.54   | 892.77   | 741.11   |
| Seychelles                             | 4.35     | 4.22     | 4.35     | 3.98     | 3.88     | 3.5      | 3.7      | 4.16     | 4.06     |
| Thailand                               | 3053.8   | 3321.45  | 3046.61  | 2851.37  | 2813.32  | 2651.95  | 2250.49  | 1865.95  | 1501.34  |
| Timor-Leste                            | 39.87    | 46.93    | 50.27    | 54.32    | 58.06    | 50.19    | 49.13    | 74.35    | 81.01    |
| Vietnam                                | 2689.57  | 2917.01  | 3486.73  | 3886.38  | 3711.06  | 3508.85  | 3409.97  | 3540.82  | 3581.75  |
| Oceania                                | 339.3    | 428.49   | 459.68   | 499.22   | 544.86   | 594.67   | 621.27   | 639.23   | 683.64   |
| Federated States of Micronesia         | 6.45     | 7.37     | 8.43     | 8.47     | 8.02     | 7.18     | 5.81     | 4.87     | 4.64     |
| Fiji                                   | 40.1     | 48.47    | 49       | 44.17    | 38.4     | 34.2     | 30.83    | 28.03    | 24.74    |
| Kiribati                               | 4.7      | 6.1      | 6.4      | 6.8      | 6.94     | 6.72     | 6.69     | 6.73     | 6.57     |
| Marshall Islands                       | 1.95     | 2.72     | 3.08     | 3.56     | 4.04     | 4.5      | 4.52     | 4.75     | 4.85     |
| Papua New Guinea                       | 208.34   | 272.8    | 292.8    | 327.47   | 373.61   | 424.81   | 454.53   | 477.72   | 520.65   |
| Samoa                                  | 12.9     | 13.42    | 13.66    | 13.52    | 13.25    | 13.33    | 13.4     | 13.53    | 13.23    |
| Solomon Islands                        | 13.54    | 19.33    | 22.57    | 25.03    | 28.56    | 33.47    | 36.95    | 39.62    | 40.39    |
| Tonga                                  | 7.05     | 7.28     | 7.49     | 7.88     | 7.85     | 7.36     | 7.39     | 7.38     | 6.58     |
| Vanuatu                                | 8.26     | 11.28    | 12.84    | 14.05    | 15.23    | 16.12    | 16.96    | 18.36    | 19.68    |
| North Africa and Middle East           | 15450.17 | 20403.72 | 22746.65 | 24432.84 | 24876.29 | 25650.92 | 27199.72 | 29772.12 | 30818.67 |
| North Africa and Middle East           | 15450.17 | 20403.72 | 22746.65 | 24432.84 | 24876.29 | 25650.92 | 27199.72 | 29772.12 | 30818.67 |
| Afghanistan                            | 972.5    | 1198.49  | 1131.23  | 1065.33  | 1268.44  | 1534.72  | 1820.34  | 2059.16  | 2413.52  |
| Algeria                                | 1187.6   | 1521.2   | 1733.82  | 1911.61  | 2068.85  | 2326.81  | 2516.64  | 2483     | 2222.42  |
| Bahrain                                | 16.29    | 23.29    | 28.83    | 33.37    | 32.88    | 32.88    | 28.62    | 38.43    | 48.91    |
| Egypt                                  | 2688.69  | 3314.24  | 3630.18  | 3843.42  | 3781.76  | 3889.78  | 4260.19  | 4834.87  | 5291.01  |
| Iran                                   | 2367.07  | 3574.64  | 4202.6   | 4613.08  | 3882.5   | 3047.58  | 3320.68  | 3939.95  | 3934.01  |
| Iraq                                   | 920.47   | 1220.7   | 1368.67  | 1488.52  | 1640.63  | 1878.84  | 2099.48  | 2810.55  | 3740.91  |
| Jordan                                 | 172.56   | 218.5    | 230.65   | 252.47   | 302.85   | 341.13   | 351.2    | 410.42   | 468.04   |
| Kuwait                                 | 72.88    | 118.4    | 133.27   | 117.56   | 102.66   | 103.63   | 107.31   | 131.14   | 138.11   |
| Lebanon                                | 212.54   | 215.57   | 196.6    | 175.46   | 159.79   | 145.47   | 129.4    | 128.6    | 156.37   |
| Libya                                  | 154.88   | 198.96   | 224.17   | 249.58   | 276.75   | 309.71   | 327.14   | 315.88   | 224.79   |
| Morocco                                | 1118.09  | 1364.32  | 1551.23  | 1688.36  | 1688.16  | 1554.87  | 1401.64  | 1269.74  | 1114.98  |
| Palestine                              | 131.99   | 141.96   | 154.99   | 185.61   | 224.03   | 263.11   | 284.15   | 379.67   | 530.26   |
| Oman                                   | 66.71    | 109.43   | 138.48   | 163.94   | 183.72   | 207.3    | 224.57   | 216.46   | 216.39   |
| Qatar                                  | 7.92     | 14.66    | 20.46    | 25.12    | 26.68    | 25.35    | 30.12    | 42.89    | 60.58    |
| Saudi Arabia                           | 568.45   | 914.63   | 1206.3   | 1467.11  | 1549.45  | 1638.13  | 1662.35  | 1534.92  | 1228.22  |
| Sudan                                  | 759.38   | 976.74   | 1066.1   | 1236.24  | 1529.54  | 1908.04  | 2114.34  | 2150.12  | 2068.95  |
| Syria                                  | 575.56   | 797.08   | 907.24   | 1012.05  | 1105     | 1191.1   | 1188.55  | 1226.2   | 859.21   |
| Tunisia                                | 370.95   | 465.8    | 518.5    | 528.46   | 484.16   | 420.39   | 398.44   | 432.49   | 407.43   |
| Turkey                                 | 2530.34  | 3226.02  | 3324.82  | 3171.1   | 3070.76  | 3119.56  | 3024.79  | 3046.99  | 3008.83  |
| United Arab Emirates                   | 21.93    | 69.75    | 113.61   | 134.54   | 150.81   | 174.59   | 213.39   | 338.26   | 399.06   |
| Yemen                                  | 526.78   | 707.88   | 850.34   | 1054.31  | 1330.15  | 1520.79  | 1674.07  | 1955.88  | 2261.72  |
| South Asia                             | 49494.57 | 61795.68 | 68364.26 | 73099.64 | 74722.87 | 75652.12 | 76689.07 | 77460.25 | 73170.42 |
| South Asia                             | 49494.57 | 61795.68 | 68364.26 | 73099.64 | 74722.87 | 75652.12 | 76689.07 | 77460.25 | 73170.42 |
| Bangladesh                             | 5009     | 5512.56  | 6310.49  | 7143.81  | 7325.81  | 7325.81  | 7464.57  | 7489.3   | 7005.98  |
| Bhutan                                 | 24.19    | 32.8     | 36.52    | 41.96    | 43.48    | 43.45    | 46.22    | 44.73    | 38.3     |
| India                                  | 38527.31 | 48428.76 | 52550.88 | 55190.68 | 56401.24 | 57668.61 | 58692.63 | 58227.43 | 53126.33 |
| Nepal                                  | 901.12   | 1162.77  | 1319.32  | 1496.68  | 1625.03  | 1715.24  | 1695.06  | 1690.39  | 1934.64  |
| Pakistan                               | 5032.95  | 6658.8   | 8147.05  | 9226.5   | 9237.99  | 8899.01  | 8790.59  | 10008.39 | 11065.17 |
| Sub-Saharan Africa                     | 25096.6  | 32006.76 | 35982.17 | 40582.39 | 45395.25 | 50928.1  | 58356.43 | 67263.67 | 77260.4  |
| Southern Sub-Saharan Africa            | 1981.5   | 2541.29  | 2884.62  | 3254.24  | 3466.9   | 3569.74  | 3773.69  | 4004.48  | 4265.77  |
| Botswana                               | 56.05    | 74.61    | 85.53    | 93.82    | 99.49    | 105.64   | 111.75   | 122.6    | 130.69   |
| Lesotho                                | 83.29    | 96.94    | 104.1    | 108.74   | 112.65   | 117.96   | 119.6    | 123.35   | 128.3    |
| Namibia                                | 66.55    | 81.35    | 88.83    | 110.08   | 133.04   | 140.99   | 141.15   | 144.39   | 164.66   |
| South Africa                           | 1319.89  | 1682.86  | 1884.74  | 2075.68  | 2187.58  | 2243     | 2380.97  | 2442.25  | 2478.73  |
| Swaziland                              | 35.59    | 46.75    | 53.87    | 64.93    | 71.35    | 74.15    | 79.7     | 91.94    | 103.26   |
| Zimbabwe                               | 420.14   | 558.77   | 667.54   | 800.99   | 862.79   | 887.99   | 940.52   | 1079.95  | 1260.14  |
| Western Sub-Saharan Africa             | 10314.51 | 12767.11 | 14262.11 | 16011.56 | 18122.69 | 20558.64 | 23809.52 | 27571.41 | 31758.55 |
| Benin                                  | 250.55   | 319      | 368.39   | 419.26   | 484.84   | 564.62   | 668.19   | 789.74   | 940.56   |

Appendix Table 16C. Under-5 population (in thousands) by location, females, 1970, 1975, 1980, 1985, 1990, 1995, 2000, 2005, 2010, 2016

| Country                          | 1970    | 1980     | 1985     | 1990     | 1995     | 2000     | 2005     | 2010     | 2016     |
|----------------------------------|---------|----------|----------|----------|----------|----------|----------|----------|----------|
| Burkina Faso                     | 508.96  | 611.59   | 690.55   | 796.92   | 900.64   | 1023.61  | 1209.11  | 1412.11  | 1569.69  |
| Cameroun                         | 620.89  | 754.9    | 862.19   | 994.92   | 1117.48  | 1237.29  | 1409.55  | 1642.12  | 1921.28  |
| Cape Verde                       | 18.83   | 20.76    | 24.93    | 28.5     | 30.01    | 31.93    | 34.3     | 36.92    | 37.07    |
| Chad                             | 327.11  | 415.66   | 455.37   | 521.48   | 606.62   | 706.33   | 849.68   | 1039.16  | 1309.85  |
| Cote d'Ivoire                    | 438.12  | 662.41   | 837.41   | 989.33   | 1078.5   | 1210.36  | 1371.22  | 1519.57  | 1770.47  |
| The Gambia                       | 50.74   | 66.37    | 75.64    | 90.44    | 109.18   | 126.79   | 143.87   | 160.28   | 181.18   |
| Ghana                            | 794.94  | 920.93   | 1034.27  | 1193.8   | 1265.73  | 1313.53  | 1507.25  | 1832.35  | 2128.39  |
| Guinea                           | 329.74  | 368.82   | 400.3    | 460.13   | 578.23   | 694.55   | 773.11   | 868.74   | 1012.1   |
| Guinea-Bissau                    | 54.16   | 70.11    | 76.48    | 83.49    | 92.46    | 103.46   | 118.24   | 134.7    | 153.76   |
| Liberia                          | 124.71  | 163.67   | 190.47   | 198.48   | 186.39   | 227.09   | 280.6    | 309.57   | 348.67   |
| Mali                             | 502.8   | 622.76   | 697.56   | 763.55   | 854.49   | 997.54   | 1168.28  | 1347.78  | 1551.45  |
| Mauritania                       | 87.51   | 111.54   | 127.62   | 144.33   | 161.84   | 181.7    | 207.62   | 232.51   | 252.34   |
| Niger                            | 431.1   | 542.18   | 620.3    | 711.52   | 840.5    | 1015.59  | 1213.92  | 1448.1   | 1805.75  |
| Nigeria                          | 5036.86 | 6167.52  | 6726.78  | 7381.77  | 8450.18  | 9662.71  | 11149.57 | 12962.38 | 14439.48 |
| Sao Tome and Principe            | 6.51    | 8.09     | 8.91     | 9.74     | 10.75    | 12.01    | 13.34    | 14.6     | 16.48    |
| Senegal                          | 346.22  | 459.61   | 523.92   | 607.86   | 695.43   | 759.6    | 892.11   | 1074.36  | 1255.5   |
| Sierra Leone                     | 207.75  | 250.4    | 272.61   | 300.11   | 308.85   | 307.25   | 365.45   | 447.37   | 518.93   |
| Togo                             | 176.64  | 230.49   | 268.09   | 315.67   | 350.31   | 382.43   | 433.95   | 484.94   | 545.53   |
| Eastern Sub-Saharan Africa       | 9948.19 | 13103.06 | 14764.47 | 16743.49 | 18553.75 | 20727.63 | 23644.58 | 27055.89 | 30938.88 |
| Burundi                          | 335.36  | 400.35   | 471.58   | 527.56   | 550.31   | 561.29   | 643.34   | 837.93   | 1061.95  |
| Comoros                          | 18.52   | 24.28    | 28.44    | 31.53    | 34.15    | 37.93    | 43.46    | 46.55    | 45.44    |
| Djibouti                         | 16.2    | 32.73    | 43.07    | 55.16    | 66.95    | 72.65    | 77.94    | 82.35    | 84.93    |
| Eritrea                          | 166.19  | 219.75   | 248.77   | 278.46   | 277.04   | 275.8    | 328.29   | 386.92   | 389.51   |
| Ethiopia                         | 2391.45 | 2967.89  | 3190.25  | 3810.06  | 4478.16  | 5094.7   | 5774.32  | 6503.14  | 7535.35  |
| Kenya                            | 1127.63 | 1621.86  | 1886.3   | 2137.51  | 2337.14  | 2555.89  | 2820.81  | 3081.72  | 3250.21  |
| Madagascar                       | 662.51  | 859.37   | 966.15   | 1086.93  | 1232.82  | 1418.23  | 1586.38  | 1736.26  | 1926.04  |
| Malawi                           | 466.9   | 603.23   | 678.96   | 846.04   | 953.84   | 1013.62  | 1146.17  | 1323.42  | 1585.28  |
| Mozambique                       | 804.39  | 1058.34  | 1133.91  | 1128.28  | 1263.76  | 1532.21  | 1812.55  | 2156.14  | 2459.91  |
| Rwanda                           | 357.27  | 520.45   | 632.97   | 715.98   | 584.92   | 648.02   | 802.28   | 906.63   | 931.51   |
| Somalia                          | 252.45  | 392.13   | 475.83   | 464.93   | 459.81   | 472.72   | 523.49   | 580.12   | 653.19   |
| South Sudan                      | 407.65  | 498.94   | 577.86   | 644.34   | 636.54   | 692.46   | 858.81   | 1070.24  | 1409.95  |
| Tanzania                         | 1447.71 | 1931.47  | 2185.65  | 2445.65  | 2789.1   | 3074.21  | 3424.75  | 3933.76  | 4452.76  |
| Uganda                           | 1033.73 | 1358.8   | 1545.2   | 1781.16  | 2039.37  | 2340.36  | 2737.72  | 3190.19  | 3726.81  |
| Zambia                           | 456.61  | 607.92   | 692.39   | 780.93   | 839.95   | 925.19   | 1049.62  | 1203.29  | 1408.8   |
| Central Sub-Saharan Africa       | 2852.41 | 3595.3   | 4070.97  | 4573.11  | 5251.9   | 6072.09  | 7128.65  | 8445.9   | 10297.2  |
| Angola                           | 584.48  | 768.14   | 910.28   | 1048.5   | 1217.1   | 1429.37  | 1690.06  | 2010.32  | 2428.78  |
| Central African Republic         | 143.05  | 171.73   | 196.84   | 218.99   | 243.47   | 271.42   | 293.9    | 320.11   | 369.08   |
| Congo                            | 115.15  | 151.33   | 173.7    | 199.48   | 226.25   | 255.21   | 288.66   | 330.85   | 368.83   |
| Democratic Republic of the Congo | 1935.31 | 2433.1   | 2706.95  | 3005.84  | 3453.61  | 3994.41  | 4720.29  | 5633.66  | 6960.14  |
| Equatorial Guinea                | 23.83   | 15.34    | 22.88    | 32.62    | 35.08    | 35.66    | 37.33    | 41.64    | 49.11    |
| Gabon                            | 50.59   | 55.66    | 60.32    | 67.69    | 76.39    | 86.03    | 98.4     | 109.32   | 121.26   |

Appendix Table 17A. Stillbirth rates (per 1,000 live births) by location, 1970-1979

|                                  | 1970                      | 1971                      | 1972                      | 1973                      | 1974                      | 1975                      | 1976                      | 1977                      | 1978                      | 1979                      |
|----------------------------------|---------------------------|---------------------------|---------------------------|---------------------------|---------------------------|---------------------------|---------------------------|---------------------------|---------------------------|---------------------------|
| <b>Global</b>                    | 41.52<br>(37.96 to 45.65) | 40.65<br>(37.14 to 44.58) | 39.91<br>(36.57 to 43.83) | 39.06<br>(35.93 to 42.8)  | 38.24<br>(35.17 to 41.8)  | 37.45<br>(34.52 to 40.83) | 36.62<br>(33.83 to 39.82) | 35.82<br>(33.13 to 38.86) | 34.94<br>(32.37 to 37.77) | 34.07<br>(31.62 to 36.72) |
| <b>High SDI</b>                  | 9.73<br>(8.51 to 11.28)   | 9.41<br>(8.26 to 10.88)   | 9.2<br>(8.12 to 10.63)    | 8.95<br>(7.9 to 10.27)    | 8.61<br>(7.66 to 9.8)     | 8.35<br>(7.48 to 9.43)    | 7.97<br>(7.18 to 8.92)    | 7.61<br>(6.87 to 8.48)    | 7.28<br>(6.61 to 8.09)    | 7.02<br>(6.42 to 7.75)    |
| <b>High-middle SDI</b>           | 26.29<br>(23.26 to 29.91) | 25.35<br>(22.41 to 28.76) | 24.51<br>(21.73 to 27.86) | 23.64<br>(21.07 to 26.79) | 22.78<br>(20.37 to 25.73) | 21.97<br>(19.65 to 24.74) | 21.18<br>(18.97 to 23.79) | 20.47<br>(18.35 to 22.91) | 19.73<br>(17.69 to 21.97) | 19.03<br>(17.14 to 21.2)  |
| <b>Middle SDI</b>                | 40.34<br>(36.64 to 44.62) | 39.17<br>(35.55 to 43.22) | 38.09<br>(34.65 to 42.08) | 36.98<br>(33.74 to 40.77) | 35.94<br>(32.84 to 39.56) | 34.88<br>(31.92 to 38.31) | 33.86<br>(31.04 to 37.11) | 32.83<br>(30.14 to 35.82) | 31.74<br>(29.2 to 34.57)  | 30.68<br>(28.25 to 33.3)  |
| <b>Low-middle SDI</b>            | 73.12<br>(67.69 to 79.27) | 71.56<br>(66.2 to 77.46)  | 70.14<br>(64.99 to 75.92) | 68.64<br>(63.7 to 74.35)  | 67.19<br>(62.42 to 72.59) | 65.75<br>(61.17 to 70.94) | 64.36<br>(59.94 to 69.36) | 62.96<br>(58.6 to 67.74)  | 61.54<br>(57.35 to 66.07) | 60.21<br>(56.18 to 64.44) |
| <b>Low SDI</b>                   | 51.16<br>(48.77 to 53.85) | 50.51<br>(48.16 to 53.1)  | 49.87<br>(47.6 to 52.43)  | 49.25<br>(47.01 to 51.78) | 48.64<br>(46.47 to 51.12) | 48.1<br>(45.99 to 50.55)  | 47.5<br>(45.49 to 49.87)  | 46.85<br>(44.92 to 49.11) | 46.22<br>(44.32 to 48.39) | 45.57<br>(43.71 to 47.62) |
| <b>High-income</b>               | 9.66<br>(8.19 to 11.62)   | 9.45<br>(8.02 to 11.34)   | 9.16<br>(7.81 to 10.99)   | 8.92<br>(7.59 to 10.63)   | 8.51<br>(7.31 to 10.04)   | 8.12<br>(7.03 to 9.49)    | 7.61<br>(6.61 to 8.82)    | 7.16<br>(6.28 to 8.26)    | 6.82<br>(6.01 to 7.84)    | 6.48<br>(5.74 to 7.42)    |
| <b>High-income North America</b> | 6.27<br>(5.69 to 6.93)    | 6.07<br>(5.49 to 6.73)    | 5.87<br>(5.32 to 6.51)    | 5.69<br>(5.19 to 6.28)    | 5.47<br>(4.98 to 6)       | 5.26<br>(4.79 to 5.77)    | 5.02<br>(4.58 to 5.51)    | 4.81<br>(4.38 to 5.21)    | 4.63<br>(4.26 to 5)       | 4.45<br>(4.13 to 4.78)    |
| Canada                           | 5.71<br>(5.61 to 5.82)    | 5.48<br>(5.38 to 5.58)    | 5.33<br>(5.24 to 5.43)    | 5.02<br>(4.93 to 5.11)    | 4.84<br>(4.75 to 4.93)    | 4.62<br>(4.54 to 4.71)    | 4.37<br>(4.3 to 4.45)     | 4.13<br>(4.06 to 4.2)     | 3.93<br>(3.87 to 4.01)    | 3.67<br>(3.61 to 3.74)    |
| Greenland                        | 15.7<br>(14.69 to 16.81)  | 14.7<br>(13.76 to 15.71)  | 13.9<br>(13.1 to 14.86)   | 13.67<br>(12.78 to 14.61) | 13.51<br>(12.67 to 14.47) | 13.55<br>(12.69 to 14.53) | 13.91<br>(13.01 to 14.89) | 13.57<br>(12.7 to 14.48)  | 13.27<br>(12.37 to 14.17) | 13.56<br>(12.61 to 14.48) |
| United States                    | 6.32<br>(5.69 to 7.04)    | 6.12<br>(5.5 to 6.85)     | 5.92<br>(5.33 to 6.62)    | 5.76<br>(5.22 to 6.4)     | 5.54<br>(4.99 to 6.12)    | 5.33<br>(4.81 to 5.88)    | 5.09<br>(4.6 to 5.63)     | 4.88<br>(4.41 to 5.32)    | 4.71<br>(4.29 to 5.11)    | 4.53<br>(4.18 to 4.89)    |
| <b>Australasia</b>               | 8.27<br>(7.13 to 9.61)    | 8.11<br>(7.01 to 9.41)    | 7.82<br>(6.76 to 9.09)    | 7.6<br>(6.63 to 8.75)     | 7.5<br>(6.54 to 8.57)     | 7.02<br>(6.11 to 7.98)    | 6.6<br>(5.78 to 7.51)     | 6.16<br>(5.38 to 7.06)    | 5.81<br>(5.06 to 6.68)    | 5.42<br>(4.68 to 6.24)    |
| Australia                        | 8.21<br>(7.0 to 9.65)     | 8.05<br>(6.88 to 9.46)    | 7.74<br>(6.61 to 9.08)    | 7.52<br>(6.44 to 8.76)    | 7.45<br>(6.39 to 8.62)    | 6.92<br>(5.94 to 7.99)    | 6.51<br>(5.6 to 7.54)     | 6.05<br>(5.18 to 7.03)    | 5.72<br>(4.88 to 6.67)    | 5.32<br>(4.52 to 6.2)     |
| New Zealand                      | 8.5<br>(7.69 to 9.41)     | 8.36<br>(7.57 to 9.25)    | 8.16<br>(7.4 to 9.02)     | 7.95<br>(7.22 to 8.77)    | 7.68<br>(6.98 to 8.45)    | 7.41<br>(6.73 to 8.13)    | 6.98<br>(6.32 to 7.66)    | 6.62<br>(6.01 to 7.25)    | 6.22<br>(5.65 to 6.81)    | 5.86<br>(5.34 to 6.43)    |
| <b>High-income Asia Pacific</b>  | 14.26<br>(11.07 to 18.58) | 13.48<br>(10.5 to 17.67)  | 12.92<br>(10.11 to 16.84) | 12.6<br>(9.8 to 16.23)    | 11.97<br>(9.4 to 15.41)   | 11.21<br>(8.8 to 14.19)   | 10.51<br>(8.33 to 13.16)  | 9.89<br>(7.86 to 12.5)    | 9.39<br>(7.51 to 11.82)   | 9<br>(7.23 to 11.21)      |
| Brunei                           | 24.1<br>(19.13 to 30.3)   | 22.67<br>(17.97 to 28.45) | 21.04<br>(16.8 to 26.36)  | 19.53<br>(15.68 to 24.4)  | 17.66<br>(14.2 to 21.88)  | 16.96<br>(13.6 to 20.97)  | 15.52<br>(12.47 to 19.19) | 14.6<br>(11.71 to 17.82)  | 13.5<br>(10.83 to 16.46)  | 12.56<br>(10.15 to 15.46) |
| Japan                            | 13.64<br>(9.38 to 19.52)  | 12.91<br>(8.92 to 18.6)   | 12.38<br>(8.62 to 17.72)  | 12.27<br>(8.64 to 17.31)  | 11.63<br>(8.11 to 16.29)  | 10.83<br>(7.57 to 14.93)  | 10.13<br>(7.09 to 13.72)  | 9.58<br>(6.8 to 13.21)    | 9.12<br>(6.5 to 12.56)    | 8.75<br>(6.29 to 12.04)   |
| Singapore                        | 13.3<br>(12.71 to 13.95)  | 12.76<br>(12.19 to 13.38) | 12.36<br>(11.81 to 12.99) | 11.98<br>(11.45 to 12.58) | 11.4<br>(10.63 to 11.69)  | 10.2<br>(9.71 to 10.7)    | 9.46<br>(9.0 to 9.91)     | 9.06<br>(8.62 to 9.48)    | 8.83<br>(8.41 to 9.23)    | 8.61<br>(8.21 to 9.02)    |
| South Korea                      | 15.55<br>(14.45 to 16.78) | 14.68<br>(13.64 to 15.84) | 14.06<br>(13.02 to 15.18) | 13.33<br>(12.35 to 14.35) | 12.73<br>(11.79 to 13.71) | 12.05<br>(11.18 to 13)    | 11.36<br>(10.53 to 12.25) | 10.61<br>(9.82 to 11.42)  | 9.97<br>(9.2 to 10.73)    | 9.45<br>(8.74 to 10.15)   |
| <b>Western Europe</b>            | 8.88<br>(8.2 to 9.72)     | 8.74<br>(8.08 to 9.53)    | 8.35<br>(7.74 to 9.09)    | 8.07<br>(7.5 to 8.78)     | 7.71<br>(7.18 to 8.35)    | 7.5<br>(7.01 to 8.08)     | 6.99<br>(6.55 to 7.52)    | 6.6<br>(6.19 to 7.07)     | 6.32<br>(5.94 to 6.75)    | 6.01<br>(5.66 to 6.39)    |
| Andorra                          | 10.7<br>(10.61 to 10.79)  | 10.05<br>(9.97 to 10.13)  | 9.28<br>(9.21 to 9.36)    | 8.46<br>(8.39 to 8.53)    | 7.67<br>(7.61 to 7.74)    | 6.98<br>(6.92 to 7.04)    | 6.46<br>(6.41 to 6.52)    | 6.13<br>(6.08 to 6.18)    | 5.84<br>(5.79 to 5.89)    | 5.49<br>(5.45 to 5.54)    |
| Austria                          | 6.17<br>(5.67 to 6.74)    | 6.18<br>(5.68 to 6.75)    | 6.08<br>(5.6 to 6.62)     | 5.74<br>(5.29 to 6.25)    | 5.73<br>(5.27 to 6.23)    | 5.34<br>(4.92 to 5.81)    | 4.82<br>(4.44 to 5.25)    | 4.48<br>(4.13 to 4.87)    | 4.18<br>(3.85 to 4.54)    | 4<br>(3.69 to 4.34)       |
| Belgium                          | 13.02<br>(8.96 to 18.63)  | 12.66<br>(8.79 to 17.95)  | 12.15<br>(8.5 to 17.16)   | 11.57<br>(8.03 to 16.37)  | 11.12<br>(7.62 to 15.63)  | 10.59<br>(7.25 to 14.82)  | 10.11<br>(6.95 to 14.06)  | 9.5<br>(6.57 to 13.15)    | 9.04<br>(6.25 to 12.49)   | 8.58<br>(5.98 to 11.73)   |
| Cyprus                           | 12.7<br>(12.16 to 13.29)  | 12.03<br>(11.52 to 12.59) | 11.63<br>(11.14 to 12.17) | 11.15<br>(10.68 to 11.67) | 10.95<br>(10.5 to 11.47)  | 10.3<br>(9.87 to 10.77)   | 10.14<br>(9.7 to 10.6)    | 9.18<br>(8.79 to 9.59)    | 8.74<br>(8.36 to 9.14)    | 8.25<br>(7.88 to 8.63)    |
| Denmark                          | 5.31<br>(4.38 to 6.43)    | 5.11<br>(4.24 to 6.15)    | 4.78<br>(3.99 to 5.71)    | 4.41<br>(3.71 to 5.25)    | 4.13<br>(3.48 to 4.88)    | 3.99<br>(3.39 to 4.66)    | 3.81<br>(3.26 to 4.42)    | 3.56<br>(3.07 to 4.09)    | 3.44<br>(2.99 to 3.92)    | 3.38<br>(2.98 to 3.8)     |
| Finland                          | 4.39<br>(4.23 to 4.57)    | 4.18<br>(4.02 to 4.35)    | 4<br>(3.85 to 4.17)       | 3.61<br>(3.48 to 3.77)    | 3.68<br>(3.54 to 3.83)    | 3.49<br>(3.36 to 3.63)    | 3.16<br>(3.04 to 3.29)    | 3.04<br>(2.93 to 3.17)    | 2.74<br>(2.64 to 2.86)    | 2.64<br>(2.55 to 2.75)    |
| France                           | 10.79<br>(10.54 to 11.06) | 10.42<br>(10.18 to 10.69) | 9.42<br>(9.59 to 10.07)   | 9.42<br>(9.2 to 9.66)     | 9.09<br>(8.88 to 9.32)    | 8.84<br>(8.44 to 9.91)    | 8.84<br>(8.65 to 9.06)    | 8.38<br>(8.19 to 8.59)    | 7.78<br>(7.6 to 7.97)     | 7.21<br>(7.05 to 7.39)    |
| Germany                          | 5.06<br>(5.01 to 5.11)    | 5.19<br>(5.15 to 5.24)    | 5<br>(4.96 to 5.05)       | 4.88<br>(4.84 to 4.93)    | 4.79<br>(4.75 to 4.84)    | 4.69<br>(4.65 to 4.74)    | 4.36<br>(4.32 to 4.4)     | 4.01<br>(3.97 to 4.05)    | 3.87<br>(3.84 to 3.91)    | 3.65<br>(3.62 to 3.68)    |
| Greece                           | 9.75<br>(9.54 to 9.97)    | 9.12<br>(8.93 to 9.32)    | 8.99<br>(8.8 to 9.2)      | 8.47<br>(8.29 to 8.66)    | 8.32<br>(8.15 to 8.51)    | 8.13<br>(7.96 to 8.32)    | 7.91<br>(7.75 to 8.09)    | 7.47<br>(7.32 to 7.64)    | 7.16<br>(7.01 to 7.32)    | 6.91<br>(6.77 to 7.07)    |
| Iceland                          | 4.26<br>(3.78 to 4.83)    | 4.18<br>(3.7 to 4.73)     | 4.05<br>(3.59 to 4.59)    | 3.92<br>(3.47 to 4.43)    | 3.8<br>(3.37 to 4.3)      | 3.7<br>(3.28 to 4.19)     | 3.48<br>(3.09 to 3.93)    | 3.35<br>(2.99 to 3.79)    | 3.24<br>(2.88 to 3.66)    | 3.02<br>(2.7 to 3.41)     |
| Ireland                          | 7.57<br>(7.11 to 8.07)    | 7.32<br>(6.88 to 7.79)    | 7.25<br>(6.82 to 7.73)    | 7.16<br>(6.81 to 7.72)    | 7.05<br>(6.75 to 7.66)    | 7.05<br>(6.65 to 7.52)    | 6.66<br>(6.28 to 7.09)    | 6.5<br>(6.12 to 6.91)     | 6.26<br>(5.91 to 6.66)    | 5.76<br>(5.44 to 6.12)    |
| Israel                           | 5.99<br>(4.95 to 7.24)    | 5.82<br>(4.84 to 7.03)    | 5.8<br>(4.81 to 6.97)     | 5.97<br>(4.95 to 7.16)    | 6.14<br>(5.1 to 7.36)     | 6.21<br>(5.15 to 7.43)    | 5.85<br>(4.84 to 6.97)    | 5.29<br>(4.39 to 6.35)    | 4.94<br>(4.09 to 5.95)    | 4.67<br>(3.89 to 5.61)    |
| Italy                            | 9.75<br>(8.67 to 10.98)   | 9.62<br>(8.59 to 10.81)   | 9.14<br>(8.13 to 10.23)   | 8.23<br>(8.01 to 10.1)    | 7.79<br>(7.34 to 9.19)    | 7.3<br>(6.94 to 8.71)     | 7.3<br>(6.52 to 8.11)     | 6.87<br>(6.16 to 7.64)    | 6.64<br>(5.93 to 7.37)    | 6.19<br>(5.53 to 6.87)    |
| Luxembourg                       | 4.75<br>(3.7 to 6.08)     | 4.67<br>(3.66 to 5.99)    | 4.27<br>(3.34 to 5.47)    | 4.2<br>(3.31 to 5.4)      | 3.98<br>(3.12 to 5.08)    | 3.76<br>(2.9 to 4.8)      | 3.69<br>(2.84 to 4.69)    | 3.26<br>(2.5 to 4.16)     | 3.16<br>(2.43 to 4.01)    | 3.16<br>(2.43 to 4)       |
| Malta                            | 8.26<br>(8.17 to 8.35)    | 7.83<br>(7.75 to 7.92)    | 7.32<br>(7.25 to 7.4)     | 7.37<br>(7.29 to 7.45)    | 6.89<br>(6.82 to 6.97)    | 6.55<br>(6.49 to 6.63)    | 6.31<br>(6.25 to 6.39)    | 5.84<br>(5.78 to 5.91)    | 5.7<br>(5.64 to 5.77)     | 5.54<br>(5.48 to 5.6)     |
| Netherlands                      | 9.75<br>(6.33 to 14.65)   | 9.42<br>(6.1 to 14.02)    | 9.12<br>(5.84 to 13.72)   | 8.83<br>(5.8 to 13.3)     | 8.58<br>(5.6 to 12.59)    | 8.16<br>(5.4 to 11.84)    | 7.85<br>(5.26 to 11.2)    | 7.3<br>(4.85 to 10.55)    | 7.16<br>(4.75 to 10.37)   | 6.71<br>(4.4 to 9.87)     |
| Norway                           | 5.9<br>(5.49 to 6.36)     | 5.73<br>(5.35 to 6.17)    | 5.42<br>(5.06 to 5.82)    | 5.21<br>(4.86 to 5.58)    | 4.89<br>(4.57 to 5.23)    | 4.74<br>(4.44 to 5.06)    | 4.5<br>(4.23 to 4.78)     | 4.07<br>(3.83 to 4.3)     | 3.85<br>(3.63 to 4.05)    | 3.65<br>(3.45 to 3.83)    |
| Portugal                         | 14.75<br>(14.38 to 15.15) | 14.03<br>(13.68 to 14.41) | 12.95<br>(12.62 to 13.29) | 12.24<br>(11.94 to 12.58) | 11.57<br>(11.3 to 11.88)  | 10.71<br>(10.45 to 11)    | 10.08<br>(9.83 to 10.36)  | 9.68<br>(9.46 to 9.93)    | 9.07<br>(8.86 to 9.32)    | 8.65<br>(8.45 to 8.87)    |
| Spain                            | 8.31<br>(7.49 to 9.25)    | 7.99<br>(7.22 to 8.9)     | 7.36<br>(6.64 to 8.17)    | 7.03<br>(6.34 to 7.83)    | 6.66<br>(6.03 to 7.41)    | 6.29<br>(5.68 to 6.99)    | 5.85<br>(5.27 to 6.47)    | 5.55<br>(4.99 to 6.14)    | 5.38<br>(4.86 to 5.96)    | 5.08<br>(4.59 to 5.61)    |
| Sweden                           | 3.64<br>(2.87 to 4.61)    | 3.58<br>(2.85 to 4.49)    | 3.5<br>(2.77 to 4.36)     | 3.26<br>(2.59 to 4.02)    | 3.18<br>(2.54 to 3.87)    | 2.99<br>(2.39 to 3.61)    | 2.85<br>(2.34 to 3.41)    | 2.78<br>(2.36 to 3.26)    | 2.68<br>(2.33 to 3.08)    | 2.66<br>(2.36 to 2.98)    |
| Switzerland                      | 4.67<br>(4.24 to 5.15)    | 4.54<br>(4.14 to 4.99)    | 4.36<br>(3.96 to 4.79)    | 4.2<br>(3.83 to 4.61)     | 3.98<br>(3.65 to 4.36)    | 3.64<br>(3.34 to 3.97)    | 3.4<br>(3.11 to 3.71)     | 3.18<br>(2.92 to 3.46)    | 3.01<br>(2.78 to 3.26)    | 2.9<br>(2.69 to 3.1)      |
| <b>United Kingdom</b>            | 11.3<br>(11.04 to 11.58)  | 11.26<br>(11 to 11.53)    | 11.01<br>(10.76 to 11.28) | 10.78<br>(10.54 to 11.05) | 10.56<br>(10.32 to 10.83) | 10.12<br>(9.9 to 10.39)   | 9.4<br>(9.19 to 9.64)     | 8.96<br>(8.76 to 9.18)    | 8.68<br>(8.48 to 8.9)     | 8.51<br>(8.32 to 8.72)    |
| England                          | 10.15<br>(9.91 to 10.4)   | 9.91<br>(9.87 to 10.35)   | 9.64<br>(9.69 to 10.16)   | 9.41<br>(9.42 to 9.88)    | 9.1<br>(9.2 to 9.65)      | 9.02<br>(8.82 to 9.25)    | 8.34<br>(8.15 to 8.55)    | 7.93<br>(7.75 to 8.13)    | 7.76<br>(7.59 to 7.95)    | 7.64<br>(7.48 to 7.83)    |
| Northern Ireland                 | 17.6<br>(17.2 to 18.04)   | 17.53<br>(17.14 to 17.97) | 16.49<br>(16.12 to 16.91) | 16.44<br>(16.06 to 16.87) | 15.95<br>(15.56 to 16.37) | 15.29<br>(14.91 to 15.7)  | 14.87<br>(14.51 to 15.27) | 14.87<br>(13.47 to 14.17) | 13.07<br>(12.78 to 13.4)  | 12.58<br>(12.32 to 12.88) |
| Scotland                         | 16.51<br>(16.14 to 16.91) | 16.5<br>(16.15 to 16.9)   | 16.11<br>(15.75 to 16.51) | 16.17<br>(15.8 to 16.59)  | 16.08<br>(15.7 to 16.51)  | 15.33<br>(14.95 to 15.77) | 14.26<br>(13.89 to 14.7)  | 14.11<br>(13.72 to 14.57) | 12.91<br>(12.53 to 13.34) | 12.38<br>(12.01 to 12.81) |
| Wales                            | 15.16<br>(14.81 to 15.54) | 15.15<br>(14.8 to 15.52)  | 14.94<br>(14.59 to 15.33) | 14.57<br>(14.23 to 14.95) | 14.26<br>(13.91 to 14.65) | 13.82<br>(13.47 to 14.21) | 12.95<br>(12.6 to 13.33)  | 12.37<br>(12.01 to 12.77) | 12.15<br>(11.78 to 12.57) | 12<br>(11.61 to 12.43)    |
| <b>Southern Latin America</b>    | 15.37<br>(10.2 to 23.04)  | 15.17<br>(10.05 to 22.72) | 14.94<br>(9.99 to 22.03)  | 14.57<br>(10.02 to 21.13) | 14.09<br>(9.76 to 20.02)  | 13.57<br>(9.56 to 18.98)  | 12.99<br>(9.24 to 17.92)  | 12.35<br>(8.87 to 17.14)  | 11.59<br>(8.36 to 15.92)  | 10.87<br>(7.69 to 14.99)  |
| Argentina                        | 14.49<br>(10.47 to 19.86) | 14.56<br>(10.48 to 19.88) | 14.41<br>(10.34 to 19.66) | 14.04<br>(9.99 to 19.09)  | 13.52<br>(9.77 to 18.13)  | 12.97<br>(9.33 to 17.39)  | 12.47<br>(9.16 to 17)     | 11.9<br>(8.54 to 16.09)   | 11.32<br>(8.23 to 15.2)   | 10.75<br>(7.75 to 14.55   |



Appendix Table 17A. Stillbirth rates (per 1,000 live births) by location, 1970-1979

|                             | 1970                      | 1971                      | 1972                      | 1973                      | 1974                      | 1975                      | 1976                      | 1977                      | 1978                      | 1979                      |
|-----------------------------|---------------------------|---------------------------|---------------------------|---------------------------|---------------------------|---------------------------|---------------------------|---------------------------|---------------------------|---------------------------|
| Latvia                      | 6.72<br>(6.47 to 6.99)    | 6.48<br>(6.24 to 6.73)    | 6.32<br>(6.09 to 6.57)    | 6.28<br>(6.06 to 6.53)    | 6.75<br>(6.51 to 7.02)    | 7.22<br>(6.97 to 7.51)    | 7.14<br>(6.9 to 7.42)     | 6.67<br>(6.43 to 6.91)    | 6.58<br>(6.34 to 6.81)    | 6.74<br>(6.51 to 6.98)    |
| Lithuania                   | 6.66<br>(6.39 to 6.96)    | 5.82<br>(5.58 to 6.08)    | 6.21<br>(5.96 to 6.49)    | 6.26<br>(6.01 to 6.54)    | 6.41<br>(6.16 to 6.69)    | 6.43<br>(6.18 to 6.7)     | 6.2<br>(5.96 to 6.47)     | 6.02<br>(5.78 to 6.26)    | 6.18<br>(5.94 to 6.43)    | 6.04<br>(5.81 to 6.29)    |
| Moldova                     | 16.87<br>(16.02 to 17.82) | 16.4<br>(15.58 to 17.29)  | 15.94<br>(15.15 to 16.82) | 15.53<br>(14.77 to 16.41) | 15.08<br>(14.34 to 15.93) | 14.69<br>(13.97 to 15.54) | 14.35<br>(13.63 to 15.15) | 13.99<br>(13.29 to 14.79) | 13.69<br>(13.02 to 14.45) | 13.4<br>(12.74 to 14.13)  |
| Russia                      | 8.16<br>(7.94 to 8.39)    | 7.6<br>(7.4 to 7.82)      | 8.06<br>(7.84 to 8.28)    | 7.77<br>(7.55 to 7.98)    | 7.86<br>(7.64 to 8.08)    | 7.98<br>(7.76 to 8.2)     | 8.25<br>(8.02 to 8.47)    | 8.07<br>(7.85 to 8.29)    | 7.86<br>(7.64 to 8.06)    | 7.98<br>(7.76 to 8.19)    |
| Ukraine                     | 10.46<br>(10.33 to 10.6)  | 10.14<br>(10.02 to 10.27) | 9.92<br>(9.79 to 10.05)   | 9.69<br>(9.57 to 9.82)    | 9.48<br>(9.36 to 9.61)    | 9.3<br>(9.18 to 9.43)     | 9.14<br>(9.02 to 9.26)    | 9.04<br>(8.92 to 9.16)    | 8.95<br>(8.83 to 9.06)    | 8.79<br>(8.68 to 8.9)     |
| Central Europe              | 11.94<br>(10.25 to 14.13) | 11.13<br>(9.54 to 13.14)  | 10.72<br>(9.24 to 12.63)  | 10.24<br>(8.83 to 11.99)  | 9.9<br>(8.59 to 11.51)    | 9.87<br>(8.55 to 11.5)    | 9.43<br>(8.19 to 11.04)   | 9.36<br>(8.12 to 10.95)   | 8.94<br>(7.7 to 10.48)    | 8.8<br>(7.6 to 10.29)     |
| Albania                     | 11.68<br>(11.5 to 11.88)  | 11.14<br>(10.97 to 11.32) | 10.59<br>(10.43 to 10.77) | 10.05<br>(9.89 to 10.22)  | 9.55<br>(9.39 to 9.71)    | 9.08<br>(8.93 to 9.23)    | 8.67<br>(8.53 to 8.82)    | 8.29<br>(8.15 to 8.42)    | 7.94<br>(7.81 to 8.08)    | 7.69<br>(7.56 to 7.82)    |
| Bosnia and Herzegovina      | 16.71<br>(13.98 to 20.01) | 16.02<br>(13.44 to 18.98) | 15.38<br>(12.88 to 18.21) | 14.76<br>(12.45 to 17.54) | 14.14<br>(11.75 to 16.78) | 13.54<br>(11.29 to 16.14) | 12.99<br>(10.84 to 15.43) | 12.45<br>(10.33 to 14.76) | 11.9<br>(9.85 to 14.11)   | 11.34<br>(9.41 to 13.38)  |
| Bulgaria                    | 7.07<br>(5.8 to 8.61)     | 6.67<br>(5.49 to 8.13)    | 6.66<br>(5.49 to 8.12)    | 6.69<br>(5.56 to 8.15)    | 6.72<br>(5.59 to 8.18)    | 6.24<br>(5.16 to 7.63)    | 6.27<br>(5.16 to 7.61)    | 6.38<br>(5.27 to 7.67)    | 6.07<br>(5.03 to 7.25)    | 5.7<br>(4.73 to 6.81)     |
| Croatia                     | 8.79<br>(8.25 to 9.39)    | 8.49<br>(7.97 to 9.07)    | 8.21<br>(7.71 to 8.77)    | 7.95<br>(7.47 to 8.51)    | 7.71<br>(7.24 to 8.25)    | 7.51<br>(7.04 to 8.02)    | 7.32<br>(6.87 to 7.84)    | 7.12<br>(6.67 to 7.59)    | 6.92<br>(6.49 to 7.37)    | 6.73<br>(6.31 to 7.17)    |
| Czech Republic              | 5.58<br>(4.82 to 6.47)    | 5.57<br>(4.82 to 6.44)    | 5.33<br>(4.6 to 6.15)     | 5.35<br>(4.65 to 6.19)    | 5.31<br>(4.61 to 6.11)    | 5.24<br>(4.54 to 6.03)    | 5.2<br>(4.53 to 5.95)     | 5.15<br>(4.5 to 5.88)     | 4.84<br>(4.23 to 5.51)    | 4.58<br>(3.96 to 5.23)    |
| Hungary                     | 12.09<br>(11.52 to 12.71) | 11.74<br>(11.2 to 12.35)  | 11.16<br>(10.65 to 11.74) | 11.06<br>(10.58 to 11.64) | 11.81<br>(11.28 to 12.4)  | 11.38<br>(10.85 to 11.96) | 10.22<br>(9.75 to 10.74)  | 9.03<br>(8.61 to 9.47)    | 8.35<br>(7.97 to 8.76)    | 8.1<br>(7.74 to 8.47)     |
| Macedonia                   | 19.61<br>(15.26 to 25.12) | 18.98<br>(14.72 to 24.22) | 18.42<br>(14.4 to 23.59)  | 17.85<br>(14.01 to 22.74) | 17.32<br>(13.61 to 21.84) | 16.89<br>(13.28 to 21.15) | 16.61<br>(13.05 to 20.75) | 16.46<br>(12.88 to 20.6)  | 16.36<br>(12.74 to 20.67) | 16.31<br>(12.72 to 20.79) |
| Montenegro                  | 9.82<br>(8.85 to 10.91)   | 9.58<br>(8.64 to 10.67)   | 9.36<br>(8.45 to 10.39)   | 9.15<br>(8.23 to 10.21)   | 8.92<br>(8.02 to 9.92)    | 8.72<br>(7.82 to 9.67)    | 8.51<br>(7.64 to 9.4)     | 8.3<br>(7.45 to 9.18)     | 8.08<br>(7.26 to 8.94)    | 7.88<br>(7.05 to 8.75)    |
| Poland                      | 13.98<br>(9.99 to 19.35)  | 12.81<br>(9.2 to 17.57)   | 12.36<br>(8.91 to 16.8)   | 11.71<br>(8.32 to 15.73)  | 10.76<br>(7.72 to 14.66)  | 11.25<br>(8.09 to 15.27)  | 10.85<br>(7.89 to 14.7)   | 11.11<br>(8.13 to 15.01)  | 10.55<br>(7.66 to 14.24)  | 10.02<br>(7.37 to 13.45)  |
| Romania                     | 12.64<br>(12.55 to 12.73) | 11.27<br>(11.19 to 11.35) | 10.95<br>(10.87 to 11.03) | 10.21<br>(10.14 to 10.28) | 10.06<br>(9.99 to 10.13)  | 9.86<br>(9.79 to 9.93)    | 9.05<br>(8.98 to 9.11)    | 9.2<br>(9.14 to 9.26)     | 8.65<br>(8.59 to 8.72)    | 9.19<br>(9.13 to 9.26)    |
| Serbia                      | 13<br>(11.77 to 14.39)    | 12.61<br>(11.4 to 13.93)  | 12.25<br>(11.08 to 13.54) | 11.92<br>(10.82 to 13.14) | 11.63<br>(10.53 to 12.8)  | 11.36<br>(10.29 to 12.49) | 11.11<br>(10.07 to 12.19) | 10.89<br>(9.85 to 11.96)  | 10.68<br>(9.68 to 11.68)  | 10.51<br>(9.56 to 11.52)  |
| Slovakia                    | 7.7<br>(7.36 to 8.07)     | 7.42<br>(7.09 to 7.77)    | 7.36<br>(7.03 to 7.71)    | 7.41<br>(7.09 to 7.76)    | 7.04<br>(6.73 to 7.36)    | 7<br>(6.7 to 7.32)        | 7.18<br>(6.88 to 7.51)    | 6.58<br>(6.31 to 6.87)    | 6.61<br>(6.33 to 6.9)     | 6.41<br>(6.14 to 6.68)    |
| Slovenia                    | 7.9<br>(7.04 to 8.89)     | 7.62<br>(6.79 to 8.55)    | 7.36<br>(6.56 to 8.27)    | 7.13<br>(6.35 to 8)       | 6.88<br>(6.14 to 7.72)    | 6.64<br>(5.9 to 7.44)     | 6.41<br>(5.71 to 7.2)     | 6.2<br>(5.49 to 6.95)     | 5.97<br>(5.3 to 6.68)     | 5.75<br>(5.09 to 6.43)    |
| Central Asia                | 21.33<br>(20.27 to 22.52) | 20.46<br>(19.44 to 21.6)  | 19.78<br>(18.82 to 20.85) | 19.1<br>(18.2 to 20.12)   | 18.49<br>(17.65 to 19.45) | 17.94<br>(17.16 to 18.87) | 17.38<br>(16.63 to 18.24) | 16.85<br>(16.13 to 17.65) | 16.39<br>(15.71 to 17.13) | 16.06<br>(15.4 to 16.75)  |
| Armenia                     | 24.12<br>(19.92 to 29.22) | 22.75<br>(18.71 to 27.53) | 21.57<br>(17.81 to 26.06) | 20.42<br>(16.97 to 24.47) | 19.38<br>(16.21 to 23.15) | 18.48<br>(15.43 to 22.03) | 17.54<br>(14.73 to 20.78) | 16.74<br>(14.05 to 19.68) | 16.11<br>(13.6 to 18.79)  | 15.62<br>(13.21 to 18.25) |
| Azerbaijan                  | 27.39<br>(26.41 to 28.45) | 25.96<br>(25.04 to 26.93) | 24.73<br>(23.85 to 25.66) | 23.46<br>(22.59 to 24.35) | 22.27<br>(21.45 to 23.11) | 21.21<br>(20.42 to 22.01) | 20.09<br>(19.35 to 20.86) | 19.6<br>(18.89 to 20.35)  | 19.4<br>(18.68 to 20.13)  | 19.4<br>(18.67 to 20.15)  |
| Georgia                     | 27.16<br>(24.76 to 29.88) | 25.69<br>(23.41 to 28.23) | 24.36<br>(22.22 to 26.78) | 23.01<br>(21.01 to 25.32) | 21.77<br>(19.81 to 23.95) | 20.68<br>(18.84 to 22.69) | 19.61<br>(17.81 to 21.5)  | 18.6<br>(16.87 to 20.39)  | 17.64<br>(15.97 to 19.35) | 16.79<br>(15.18 to 18.43) |
| Kazakhstan                  | 14.38<br>(13.4 to 15.47)  | 13.91<br>(12.94 to 14.94) | 13.6<br>(12.68 to 14.62)  | 13.34<br>(12.45 to 14.32) | 13.13<br>(12.28 to 14.08) | 12.94<br>(12.1 to 13.86)  | 12.74<br>(11.92 to 13.61) | 12.51<br>(11.72 to 13.34) | 12.24<br>(11.46 to 13.02) | 11.98<br>(11.22 to 12.76) |
| Kyrgyzstan                  | 33.51<br>(32.31 to 34.81) | 32.14<br>(30.99 to 33.35) | 30.93<br>(29.82 to 32.1)  | 29.83<br>(28.74 to 30.96) | 28.83<br>(27.82 to 29.94) | 27.87<br>(26.89 to 28.98) | 26.95<br>(25.97 to 27.99) | 26.1<br>(25.16 to 27.06)  | 25.28<br>(24.32 to 26.22) | 24.58<br>(23.62 to 25.49) |
| Mongolia                    | 23.21<br>(22.38 to 24.12) | 22.68<br>(21.87 to 23.56) | 22.22<br>(21.43 to 23.1)  | 21.79<br>(21.01 to 22.65) | 21.42<br>(20.65 to 22.26) | 21.09<br>(20.33 to 21.93) | 20.76<br>(20.01 to 21.56) | 20.4<br>(19.66 to 21.2)   | 20.07<br>(19.33 to 20.84) | 19.75<br>(19.0 to 20.5)   |
| Tajikistan                  | 29.79<br>(29.05 to 30.58) | 28.39<br>(27.71 to 29.14) | 28.05<br>(27.36 to 28.79) | 27.63<br>(26.94 to 28.37) | 27.2<br>(26.52 to 27.92)  | 26.58<br>(25.91 to 27.27) | 25.94<br>(25.28 to 26.61) | 24.94<br>(24.32 to 25.58) | 23.7<br>(23.13 to 24.32)  | 22.57<br>(22.01 to 23.14) |
| Turkmenistan                | 27.08<br>(26.66 to 27.57) | 26.09<br>(25.68 to 26.55) | 25.23<br>(24.83 to 25.67) | 24.34<br>(23.94 to 24.76) | 23.5<br>(23.12 to 23.91)  | 22.76<br>(22.39 to 23.14) | 21.99<br>(21.63 to 22.36) | 21.25<br>(20.91 to 21.6)  | 20.57<br>(20.23 to 20.9)  | 19.91<br>(19.59 to 20.23) |
| Uzbekistan                  | 17.33<br>(16.71 to 18)    | 16.72<br>(16.12 to 17.36) | 16.17<br>(15.6 to 16.81)  | 15.57<br>(15.01 to 16.18) | 14.69<br>(14.54 to 15.68) | 14.69<br>(14.16 to 15.27) | 14.23<br>(13.72 to 14.79) | 13.77<br>(13.27 to 14.32) | 13.49<br>(13.14 to 14.01) | 13.43<br>(12.92 to 13.94) |
| Latin America and Caribbean | 28.51<br>(24.23 to 33.81) | 27.68<br>(23.51 to 32.74) | 26.9<br>(22.93 to 31.79)  | 26.04<br>(22.31 to 30.69) | 25.18<br>(21.75 to 29.49) | 24.36<br>(21.06 to 28.43) | 23.51<br>(20.38 to 27.31) | 22.64<br>(19.68 to 26.16) | 21.76<br>(18.96 to 25.03) | 20.91<br>(18.27 to 23.95) |
| Central Latin America       | 18.6<br>(17.37 to 19.99)  | 18.25<br>(17.05 to 19.59) | 17.87<br>(16.7 to 19.19)  | 17.41<br>(16.29 to 18.71) | 16.88<br>(15.81 to 18.16) | 16.31<br>(15.26 to 17.55) | 15.19<br>(14.75 to 16.91) | 14.65<br>(14.24 to 16.29) | 14.65<br>(13.74 to 15.69) | 14.16<br>(13.29 to 15.14) |
| Colombia                    | 21.36<br>(19.28 to 23.73) | 20.98<br>(18.96 to 23.23) | 20.59<br>(18.66 to 22.87) | 20.1<br>(18.21 to 22.4)   | 19.49<br>(17.65 to 21.75) | 18.83<br>(17.06 to 21.01) | 18.2<br>(16.49 to 20.28)  | 17.61<br>(15.91 to 19.57) | 17.03<br>(15.38 to 18.95) | 16.58<br>(14.98 to 18.41) |
| Costa Rica                  | 13.2<br>(11.83 to 14.77)  | 12.86<br>(11.58 to 14.31) | 12.5<br>(11.3 to 13.85)   | 12.11<br>(10.96 to 13.36) | 11.76<br>(10.68 to 12.93) | 11.43<br>(10.43 to 12.52) | 11.08<br>(10.17 to 12.04) | 10.7<br>(9.85 to 11.54)   | 10.36<br>(9.61 to 11.13)  | 10.06<br>(9.39 to 10.73)  |
| El Salvador                 | 28.39<br>(27.69 to 29.13) | 27.4<br>(26.73 to 28.11)  | 26.35<br>(25.72 to 27.05) | 25.22<br>(24.61 to 25.89) | 24.2<br>(23.61 to 24.84)  | 23.27<br>(22.7 to 23.89)  | 22.36<br>(21.81 to 22.95) | 21.47<br>(20.94 to 22.04) | 20.64<br>(20.12 to 21.17) | 19.9<br>(19.39 to 20.42)  |
| Guatemala                   | 30.74<br>(26.77 to 35.39) | 30.13<br>(26.2 to 34.57)  | 29.63<br>(25.81 to 34.03) | 29.17<br>(25.56 to 33.55) | 28.57<br>(25.05 to 32.76) | 27.83<br>(24.38 to 31.81) | 27.17<br>(23.78 to 30.99) | 26.64<br>(23.33 to 30.3)  | 26.09<br>(22.83 to 29.65) | 25.56<br>(22.33 to 28.91) |
| Honduras                    | 28.69<br>(28.54 to 28.84) | 27.83<br>(27.69 to 27.98) | 26.99<br>(26.85 to 27.13) | 26.15<br>(26.01 to 26.29) | 25.38<br>(25.25 to 25.52) | 24.67<br>(24.54 to 24.8)  | 23.84<br>(23.71 to 23.96) | 22.94<br>(22.82 to 23.06) | 21.99<br>(21.88 to 22.11) | 21.11<br>(21.1 to 21.23)  |
| Mexico                      | 14.95<br>(14.26 to 15.71) | 14.61<br>(13.94 to 15.33) | 14.24<br>(13.6 to 14.97)  | 13.85<br>(13.24 to 14.59) | 13.47<br>(12.86 to 14.18) | 13.07<br>(12.48 to 13.75) | 12.68<br>(12.11 to 13.33) | 12.29<br>(11.73 to 12.92) | 11.88<br>(11.34 to 12.48) | 11.45<br>(10.93 to 12.03) |
| Nicaragua                   | 28.86<br>(28.46 to 29.29) | 27.78<br>(27.4 to 28.2)   | 26.79<br>(26.42 to 27.19) | 25.79<br>(25.43 to 26.17) | 24.65<br>(24.31 to 25.02) | 23.66<br>(23.33 to 24)    | 22.62<br>(22.3 to 22.96)  | 21.52<br>(21.22 to 21.84) | 20.58<br>(20.29 to 20.89) | 19.96<br>(19.67 to 20.26) |
| Panama                      | 11.76<br>(10.63 to 13.04) | 11.31<br>(10.2 to 12.53)  | 10.89<br>(9.83 to 12.06)  | 10.55<br>(9.54 to 11.69)  | 10.25<br>(9.31 to 11.31)  | 9.98<br>(9.05 to 10.99)   | 9.75<br>(8.85 to 10.72)   | 9.56<br>(8.69 to 10.48)   | 9.37<br>(8.51 to 10.28)   | 9.2<br>(8.36 to 10.08)    |
| Venezuela                   | 17.2<br>(15.8 to 18.77)   | 17.59<br>(16.17 to 19.19) | 17.75<br>(16.33 to 19.4)  | 17.46<br>(16.04 to 19.07) | 16.76<br>(15.39 to 18.34) | 16.76<br>(14.6 to 17.38)  | 14.95<br>(13.74 to 16.34) | 14.04<br>(12.94 to 15.34) | 13.29<br>(12.22 to 14.48) | 12.73<br>(11.71 to 13.88) |
| Andean Latin America        | 43.81<br>(36.68 to 52.4)  | 42.19<br>(35.32 to 50.23) | 40.73<br>(34.25 to 48.53) | 39.35<br>(33.16 to 46.83) | 38.02<br>(32.13 to 45.05) | 36.82<br>(31.23 to 43.45) | 35.66<br>(30.42 to 41.88) | 34.48<br>(29.43 to 40.38) | 33.33<br>(28.49 to 39.01) | 32.21<br>(27.7 to 37.48)  |
| Bolivia                     | 56.71<br>(47.26 to 68.11) | 54.78<br>(45.75 to 65.28) | 52.89<br>(44.06 to 63.28) | 50.98<br>(42.19 to 60.97) | 49.07<br>(40.67 to 58.89) | 47.3<br>(39.25 to 56.79)  | 45.59<br>(37.75 to 54.6)  | 43.91<br>(36.61 to 52.55) | 42.39<br>(35.19 to 50.74) | 41.01<br>(33.92 to 49.09) |
| Ecuador                     | 29.2<br>(23.55 to 36.18)  | 28<br>(22.7 to 34.27)     | 27.07<br>(21.85 to 33.31) | 26.23<br>(21.06 to 32.23) | 25.5<br>(20.43 to 31.28)  | 24.86<br>(19.9 to 30.42)  | 24.11<br>(19.33 to 29.44) | 23.13<br>(18.51 to 28.26) | 22.11<br>(17.74 to 26.9)  | 21.26<br>(17.05 to 25.92) |
| Peru                        | 45.13<br>(38.31 to 53.25) | 43.49<br>(36.85 to 51.28) | 42.04<br>(35.68 to 49.51) | 40.69<br>(34.55 to 47.89) | 39.38<br>(33.49 to 46.25) | 38.21<br>(32.55 to 44.94) | 37.14<br>(31.78 to 43.48) | 36.13<br>(30.82 to 42.13) | 35.14<br>(29.99 to 40.72) | 34.05<br>(29.1 to 39.43)  |
| Caribbean                   | 38.9<br>(31.57 to 48.89)  | 37.83<br>(30.72 to 47.65) | 37.18<br>(30.55 to 46.31) | 36.47<br>(30.08 to 44.8)  | 35.78<br>(29.85 to 43.42) | 35.09<br>(29.42 to 41.97) | 34.41<br>(29.02 to 40.86) | 33.95<br>(28.75 to 40.21) | 33.41<br>(28.18 to 39.37) | 32.47<br>(27.39 to 38.36) |
| Antigua and Barbuda         | 14.8<br>(12.06 to 18.16)  | 14.28<br>(11.66 to 17.46) | 13.89<br>(11.32 to 17.04) | 13.47<br>(10.96 to 16.42) | 13.06<br>(10.96 to 16.56) | 12.66<br>(10.99 to 16.61) | 12.26<br>(10.98 to 16.58) | 11.87<br>(10.84 to 16.34) | 11.48<br>(10.65 to 16.07) | 11.09<br>(10.17 to 15.45) |
| The Bahamas                 | 23.76<br>(14.54 to 37.51) | 22.63<br>(13.91 to 35.7)  | 21.46<br>(13.31 to 33.77) | 20.12<br>(12.57 to 31.64) | 19.53<br>(12.33 to 30.19) | 20.33<br>(12.73 to 30.89) | 19.2<br>(12.04 to 29.36)  | 18.59<br>(11.55 to 27.63) | 18.12<br>(11.27 to 26.98) | 17.96<br>(11.35 to 27.11) |
| Barbados                    | 20.76<br>(16.91 to 25.48) | 19.5<br>(15.92 to 23.72)  | 18.51<br>(15.07 to 22.62) | 17.55<br>(14.22 to 21.46) | 16.72<br>(13.54 to 20.51) | 15.86<br>(12.86 to 19.46) | 15.16<br>(12.25 to 18.54) | 14.49<br>(11.81 to 17.71) | 13.93<br>(11.3 to 17.03)  | 13.34<br>(10.79 to 16.3)  |
| Belize                      | 27.1<br>(22.08 to 33.26)  | 26.14<br>(21.34 to 31.96) | 25.08<br>(20.43 to 30.77) |                           |                           |                           |                           |                           |                           |                           |

Appendix Table 17A. Stillbirth rates (per 1,000 live births) by location, 1970-1979

|                                               | 1970                         | 1971                        | 1972                        | 1973                        | 1974                        | 1975                        | 1976                        | 1977                        | 1978                       | 1979                       |
|-----------------------------------------------|------------------------------|-----------------------------|-----------------------------|-----------------------------|-----------------------------|-----------------------------|-----------------------------|-----------------------------|----------------------------|----------------------------|
| Guyana                                        | 33.9<br>(31.51 to 36.56)     | 33.12<br>(30.8 to 35.69)    | 32.4<br>(30.12 to 34.93)    | 31.68<br>(29.5 to 34.16)    | 30.93<br>(28.81 to 33.37)   | 29.91<br>(27.84 to 32.21)   | 28.65<br>(26.62 to 30.86)   | 27.7<br>(25.74 to 29.82)    | 26.77<br>(24.88 to 28.85)  | 26.05<br>(24.11 to 28.09)  |
| Haiti                                         | 81.27<br>(66.2 to 99.74)     | 79.49<br>(64.89 to 97.18)   | 77.47<br>(63.11 to 95.02)   | 74.64<br>(60.73 to 90.96)   | 71.59<br>(57.85 to 87.42)   | 69.4<br>(56.09 to 84.75)    | 67.7<br>(54.83 to 82.77)    | 66.22<br>(53.69 to 80.97)   | 64.59<br>(52.29 to 78.88)  | 62.29<br>(50.23 to 76.29)  |
| Jamaica                                       | 24.04<br>(21.31 to 27.19)    | 23.59<br>(20.91 to 26.61)   | 22.86<br>(20.29 to 25.79)   | 22.22<br>(19.8 to 25.12)    | 21.76<br>(19.38 to 24.49)   | 21.31<br>(18.97 to 23.9)    | 20.67<br>(18.44 to 23.18)   | 20.03<br>(17.87 to 22.39)   | 19.56<br>(17.42 to 21.84)  | 19.23<br>(17.11 to 21.43)  |
| Puerto Rico                                   | 18.04<br>(17.22 to 18.94)    | 17.38<br>(16.6 to 18.22)    | 16.73<br>(15.99 to 17.54)   | 15.98<br>(15.26 to 16.76)   | 15.26<br>(14.58 to 15.99)   | 14.64<br>(13.98 to 15.34)   | 14.15<br>(13.51 to 14.82)   | 13.81<br>(13.18 to 14.45)   | 13.57<br>(12.96 to 14.2)   | 13.42<br>(12.81 to 14.03)  |
| Saint Lucia                                   | 19.79<br>(17.56 to 22.36)    | 18.99<br>(16.89 to 21.41)   | 18.23<br>(16.2 to 20.6)     | 17.54<br>(15.52 to 19.81)   | 16.89<br>(14.93 to 19.09)   | 16.45<br>(14.47 to 18.57)   | 15.94<br>(14.01 to 17.95)   | 15.5<br>(13.62 to 17.44)    | 15.22<br>(13.37 to 17.12)  | 15<br>(13.19 to 16.88)     |
| Saint Vincent and the Grenadines              | 13.48<br>(8.96 to 19.86)     | 13<br>(8.59 to 19.17)       | 12.48<br>(8.27 to 18.41)    | 12.03<br>(7.99 to 17.49)    | 11.66<br>(7.82 to 16.83)    | 11.41<br>(7.67 to 16.41)    | 11.11<br>(7.49 to 15.94)    | 10.87<br>(7.37 to 15.39)    | 10.62<br>(7.19 to 15)      | 10.37<br>(7.01 to 14.7)    |
| Suriname                                      | 24.9<br>(21.39 to 29.04)     | 24.53<br>(21.06 to 28.53)   | 23.99<br>(20.66 to 28.02)   | 23.79<br>(20.65 to 27.77)   | 23.82<br>(20.64 to 27.85)   | 23.77<br>(20.56 to 27.71)   | 23.65<br>(20.47 to 27.41)   | 23.38<br>(20.2 to 26.88)    | 23.02<br>(19.9 to 26.41)   | 22.65<br>(19.56 to 25.96)  |
| Trinidad and Tobago                           | 20.82<br>(17.95 to 24.54)    | 20.57<br>(17.86 to 24.12)   | 20.27<br>(17.56 to 23.63)   | 19.99<br>(17.36 to 23.18)   | 19.48<br>(16.95 to 22.5)    | 19.01<br>(16.67 to 21.72)   | 18.47<br>(16.31 to 21.01)   | 17.89<br>(15.87 to 20.22)   | 17.25<br>(15.37 to 19.29)  | 16.61<br>(14.93 to 18.43)  |
| Virgin Islands, U.S.                          | 13.56<br>(11.04 to 16.64)    | 13.32<br>(10.88 to 16.21)   | 13.08<br>(10.65 to 15.98)   | 12.85<br>(10.41 to 15.72)   | 12.61<br>(10.21 to 15.46)   | 12.4<br>(10.05 to 15.2)     | 12.19<br>(9.85 to 14.91)    | 11.99<br>(9.77 to 14.66)    | 11.8<br>(9.57 to 14.42)    | 11.58<br>(9.37 to 14.15)   |
| <b>Tropical Latin America</b>                 | 32.49<br>(26.55 to 39.75)    | 31.4<br>(25.56 to 38.39)    | 30.39<br>(24.84 to 37.06)   | 29.34<br>(24.15 to 35.79)   | 28.34<br>(23.26 to 34.49)   | 27.4<br>(22.66 to 33.28)    | 26.34<br>(21.71 to 31.81)   | 25.2<br>(20.72 to 30.38)    | 24.01<br>(19.77 to 28.74)  | 22.84<br>(18.75 to 27.33)  |
| Brazil                                        | 32.72<br>(26.79 to 39.96)    | 31.61<br>(25.78 to 38.58)   | 30.6<br>(25.07 to 37.25)    | 29.53<br>(24.35 to 35.94)   | 28.53<br>(23.46 to 34.62)   | 27.58<br>(22.84 to 33.39)   | 26.49<br>(21.89 to 31.96)   | 25.34<br>(20.88 to 30.48)   | 24.13<br>(19.91 to 28.83)  | 22.94<br>(18.88 to 27.4)   |
| Paraguay                                      | 23.16<br>(16.86 to 31.53)    | 22.74<br>(16.54 to 30.82)   | 22.23<br>(16.16 to 30.27)   | 21.66<br>(16.06 to 29.42)   | 21.08<br>(15.63 to 28.89)   | 20.55<br>(15.16 to 27.93)   | 20.05<br>(14.68 to 26.89)   | 19.55<br>(14.32 to 25.86)   | 19.05<br>(14.04 to 25.14)  | 18.55<br>(13.65 to 24.44)  |
| <b>Southeast Asia, East Asia, and Oceania</b> | 29.4<br>(26.98 to 32.15)     | 28.33<br>(26.03 to 30.85)   | 27.37<br>(25.17 to 29.89)   | 26.45<br>(24.4 to 28.89)    | 25.63<br>(23.7 to 27.94)    | 24.81<br>(22.95 to 27.02)   | 24.05<br>(22.3 to 26.08)    | 23.36<br>(21.69 to 25.21)   | 22.61<br>(21.2 to 24.32)   | 21.92<br>(20.39 to 23.54)  |
| <b>East Asia</b>                              | 27.79<br>(24.96 to 31.03)    | 26.72<br>(24.01 to 29.73)   | 25.76<br>(23.17 to 28.78)   | 24.83<br>(22.41 to 27.73)   | 24.01<br>(21.7 to 26.85)    | 23.17<br>(20.92 to 25.87)   | 22.44<br>(20.25 to 24.94)   | 21.79<br>(19.68 to 24.08)   | 21.09<br>(19.05 to 23.22)  | 20.44<br>(18.44 to 22.53)  |
| China                                         | 28.24<br>(25.36 to 31.53)    | 27.16<br>(24.41 to 30.22)   | 26.19<br>(23.55 to 29.27)   | 25.25<br>(22.79 to 28.19)   | 24.43<br>(22.08 to 27.31)   | 23.6<br>(21.31 to 26.35)    | 22.88<br>(20.64 to 25.43)   | 22.21<br>(20.06 to 24.55)   | 21.51<br>(19.43 to 23.7)   | 20.84<br>(18.79 to 22.99)  |
| North Korea                                   | 15.17<br>(13.2 to 17.47)     | 14.36<br>(12.53 to 16.5)    | 13.63<br>(11.85 to 15.66)   | 13<br>(11.27 to 14.93)      | 12.46<br>(10.82 to 14.33)   | 12.04<br>(10.44 to 13.87)   | 11.66<br>(10.11 to 13.39)   | 11.27<br>(9.81 to 12.95)    | 11.01<br>(9.55 to 12.65)   | 10.72<br>(9.28 to 12.32)   |
| Taiwan (Province of China)                    | 15.32<br>(14.52 to 16.2)     | 14.65<br>(13.88 to 15.48)   | 13.62<br>(12.89 to 14.41)   | 13.45<br>(12.74 to 14.22)   | 12.82<br>(12.15 to 13.58)   | 12.22<br>(11.57 to 12.93)   | 11.41<br>(10.82 to 12.08)   | 10.98<br>(10.42 to 11.62)   | 10.42<br>(9.87 to 11.02)   | 10.05<br>(9.51 to 10.62)   |
| <b>Southeast Asia</b>                         | 33.76<br>(32.49 to 35.16)    | 32.56<br>(31.34 to 33.91)   | 31.46<br>(30.28 to 32.76)   | 30.38<br>(29.25 to 31.63)   | 29.36<br>(28.29 to 30.55)   | 28.39<br>(27.38 to 29.5)    | 27.44<br>(26.44 to 28.5)    | 26.52<br>(25.58 to 27.53)   | 25.56<br>(24.69 to 26.5)   | 24.71<br>(23.86 to 25.6)   |
| Cambodia                                      | 48.7<br>(47.33 to 50.17)     | 48.05<br>(46.7 to 49.49)    | 47.45<br>(46.11 to 48.88)   | 47.82<br>(46.51 to 49.26)   | 47.87<br>(46.57 to 49.33)   | 47.04<br>(45.74 to 48.43)   | 46.16<br>(44.85 to 47.52)   | 45.27<br>(44.06 to 46.61)   | 44.12<br>(42.87 to 45.44)  | 42.99<br>(41.72 to 44.29)  |
| Indonesia                                     | 40.93<br>(39.87 to 42.07)    | 39.54<br>(38.52 to 40.64)   | 38.14<br>(37.14 to 39.2)    | 36.71<br>(35.78 to 37.74)   | 35.31<br>(34.43 to 36.31)   | 34.12<br>(33.25 to 35.06)   | 33.02<br>(32.15 to 33.92)   | 31.91<br>(31.08 to 32.78)   | 30.9<br>(30.09 to 31.75)   | 29.89<br>(29.07 to 30.72)  |
| Laos                                          | 74.54<br>(73.36 to 75.8)     | 73.09<br>(71.95 to 74.35)   | 71.67<br>(70.55 to 72.89)   | 70.16<br>(69.07 to 71.36)   | 68.65<br>(67.57 to 69.84)   | 67.1<br>(66.03 to 68.25)    | 65.47<br>(64.42 to 66.58)   | 64.28<br>(63.25 to 65.38)   | 63<br>(61.97 to 64.06)     | 61.77<br>(60.73 to 62.79)  |
| Malaysia                                      | 12.89<br>(10.65 to 15.62)    | 12.46<br>(10.27 to 15.07)   | 11.86<br>(9.82 to 14.34)    | 11.44<br>(9.45 to 13.8)     | 11.08<br>(9.23 to 13.3)     | 10.79<br>(8.98 to 12.91)    | 10.41<br>(8.68 to 12.43)    | 10.7<br>(8.92 to 12.73)     | 9.79<br>(8.17 to 11.56)    | 9.27<br>(7.73 to 11)       |
| Maldives                                      | 126.24<br>(101.99 to 156.14) | 121.65<br>(97.88 to 149.74) | 117.15<br>(94.43 to 145.44) | 113.18<br>(91.05 to 139.87) | 109.29<br>(88.54 to 134.21) | 105.05<br>(85.27 to 129.05) | 102.76<br>(83.86 to 125.47) | 100.52<br>(81.75 to 121.93) | 97.37<br>(79.32 to 117.65) | 93.95<br>(76.28 to 113.57) |
| Mauritius                                     | 36.2<br>(32.33 to 40.62)     | 34.65<br>(31.03 to 38.83)   | 32.93<br>(29.56 to 36.86)   | 31.04<br>(27.82 to 34.76)   | 29.1<br>(25.94 to 32.51)    | 27.46<br>(24.59 to 30.75)   | 25.78<br>(22.98 to 28.87)   | 24.32<br>(21.69 to 27.21)   | 23.02<br>(20.54 to 25.63)  | 21.94<br>(19.69 to 24.39)  |
| Myanmar                                       | 41.45<br>(40.94 to 42)       | 39.28<br>(38.79 to 39.79)   | 37.42<br>(36.95 to 37.91)   | 35.79<br>(35.35 to 36.26)   | 34.3<br>(33.89 to 34.76)    | 32.99<br>(32.59 to 33.42)   | 31.77<br>(31.38 to 32.18)   | 30.69<br>(30.3 to 31.08)    | 29.67<br>(29.3 to 30.06)   | 28.72<br>(28.34 to 29.1)   |
| Philippines                                   | 18.98<br>(18.68 to 19.3)     | 18.64<br>(18.34 to 18.95)   | 18.3<br>(18.01 to 18.61)    | 17.93<br>(17.66 to 18.23)   | 17.57<br>(17.3 to 17.87)    | 17.22<br>(16.95 to 17.5)    | 16.89<br>(16.62 to 17.16)   | 16.55<br>(16.28 to 16.82)   | 16.2<br>(15.94 to 16.47)   | 15.86<br>(15.6 to 16.13)   |
| Sri Lanka                                     | 21.58<br>(20.47 to 22.79)    | 20.6<br>(19.57 to 21.75)    | 20.86<br>(19.81 to 22.05)   | 20.55<br>(19.51 to 21.75)   | 21.02<br>(19.96 to 22.23)   | 20.29<br>(19.29 to 21.45)   | 19.48<br>(18.53 to 20.56)   | 18.3<br>(17.42 to 19.29)    | 16.13<br>(15.33 to 17.02)  | 15.66<br>(14.87 to 16.52)  |
| Seychelles                                    | 23.79<br>(21.88 to 25.93)    | 22.79<br>(20.95 to 24.87)   | 21.93<br>(20.17 to 23.92)   | 21.12<br>(19.5 to 23.02)    | 20.53<br>(18.98 to 22.39)   | 19.81<br>(18.26 to 21.66)   | 18.88<br>(17.37 to 20.64)   | 17.94<br>(16.47 to 19.62)   | 16.8<br>(15.49 to 18.33)   | 15.61<br>(14.39 to 17)     |
| Thailand                                      | 24.14<br>(21.61 to 27.05)    | 22.98<br>(20.57 to 25.75)   | 21.93<br>(19.67 to 24.51)   | 20.88<br>(18.7 to 23.36)    | 19.92<br>(17.84 to 22.23)   | 19.02<br>(16.98 to 21.23)   | 18.13<br>(16.22 to 20.18)   | 17.24<br>(15.41 to 19.19)   | 16.37<br>(14.63 to 18.23)  | 15.56<br>(13.89 to 17.35)  |
| Timor-Leste                                   | 73.03<br>(72.43 to 73.66)    | 70.55<br>(69.97 to 71.15)   | 68.07<br>(67.52 to 68.66)   | 65.56<br>(65.04 to 66.13)   | 62.9<br>(62.4 to 63.45)     | 60.44<br>(59.96 to 60.96)   | 58.79<br>(58.3 to 59.29)    | 57.98<br>(57.5 to 58.47)    | 57.63<br>(57.15 to 58.12)  | 56.73<br>(56.24 to 57.23)  |
| Vietnam                                       | 30.67<br>(28.93 to 32.58)    | 29.92<br>(28.23 to 31.77)   | 29.18<br>(27.53 to 30.99)   | 28.48<br>(26.9 to 30.25)    | 27.76<br>(26.24 to 29.51)   | 27.1<br>(25.6 to 28.76)     | 26.33<br>(24.83 to 27.94)   | 25.46<br>(24.02 to 27.01)   | 24.69<br>(23.29 to 26.22)  | 23.96<br>(22.53 to 25.45)  |
| <b>Oceania</b>                                | 33.46<br>(30.84 to 36.4)     | 33.19<br>(30.58 to 36)      | 32.94<br>(30.34 to 35.84)   | 32.7<br>(30.1 to 35.6)      | 32.45<br>(29.84 to 35.38)   | 32.31<br>(29.76 to 35.24)   | 32.18<br>(29.69 to 35.11)   | 32.15<br>(29.66 to 35.07)   | 32.11<br>(29.84 to 35.16)  | 32.41<br>(29.9 to 35.24)   |
| American Samoa                                | 14.73<br>(13.55 to 16.06)    | 14.29<br>(13.13 to 15.54)   | 13.92<br>(12.79 to 15.18)   | 13.52<br>(12.41 to 14.75)   | 13.12<br>(12.03 to 14.34)   | 12.72<br>(11.68 to 13.91)   | 12.33<br>(11.34 to 13.5)    | 11.98<br>(11.02 to 13.1)    | 11.63<br>(10.71 to 12.7)   | 11.31<br>(10.4 to 12.32)   |
| Federated States of Micronesia                | 25<br>(22.99 to 27.26)       | 24.53<br>(22.55 to 26.71)   | 24.13<br>(22.17 to 26.36)   | 23.76<br>(21.82 to 25.97)   | 23.4<br>(21.47 to 25.56)    | 23.16<br>(21.27 to 25.33)   | 22.94<br>(21.09 to 25.11)   | 22.63<br>(20.81 to 24.75)   | 22.38<br>(20.61 to 24.43)  | 21.95<br>(20.19 to 23.92)  |
| Fiji                                          | 12.03<br>(11.69 to 12.4)     | 12.16<br>(11.82 to 12.53)   | 12.24<br>(11.89 to 12.61)   | 12.2<br>(11.87 to 12.58)    | 12.11<br>(11.78 to 12.48)   | 12.17<br>(11.83 to 12.54)   | 11.78<br>(11.44 to 12.13)   | 11.53<br>(11.2 to 11.87)    | 11.59<br>(11.26 to 11.94)  | 11.08<br>(10.75 to 11.42)  |
| Guam                                          | 19.13<br>(18.47 to 19.85)    | 18.7<br>(18.06 to 19.38)    | 18.2<br>(17.6 to 18.88)     | 17.79<br>(17.2 to 18.47)    | 17.29<br>(16.71 to 17.96)   | 16.68<br>(16.13 to 17.33)   | 15.97<br>(15.44 to 16.58)   | 15.16<br>(14.64 to 15.73)   | 14.38<br>(13.89 to 14.93)  | 13.5<br>(13.04 to 14)      |
| Kiribati                                      | 34.94<br>(32.13 to 38.09)    | 34.64<br>(31.84 to 37.71)   | 34.23<br>(31.45 to 37.4)    | 33.6<br>(30.86 to 36.73)    | 32.28<br>(29.62 to 35.26)   | 31.11<br>(28.56 to 34.02)   | 30.68<br>(28.2 to 33.58)    | 30.38<br>(27.94 to 33.23)   | 30.06<br>(27.69 to 32.81)  | 29.82<br>(27.43 to 32.49)  |
| Marshall Islands                              | 19.61<br>(18.03 to 21.38)    | 19.26<br>(17.71 to 20.98)   | 18.99<br>(17.45 to 20.75)   | 18.56<br>(17.04 to 20.28)   | 18.16<br>(16.66 to 19.84)   | 17.95<br>(16.48 to 19.63)   | 17.78<br>(16.35 to 19.47)   | 17.59<br>(16.18 to 19.24)   | 17.41<br>(16.04 to 19.01)  | 17.23<br>(15.85 to 18.77)  |
| Northern Mariana Islands                      | 11.45<br>(10.53 to 12.48)    | 11.03<br>(10.16 to 12.02)   | 10.66<br>(9.81 to 11.65)    | 10.25<br>(9.43 to 11.19)    | 9.71<br>(8.94 to 10.6)      | 9.08<br>(8.35 to 9.91)      | 8.6<br>(7.9 to 9.38)        | 8.23<br>(7.54 to 8.97)      | 7.93<br>(7.25 to 8.65)     | 7.64<br>(6.98 to 8.32)     |
| Papua New Guinea                              | 39.44<br>(36.27 to 43.01)    | 39.04<br>(35.88 to 42.44)   | 38.69<br>(35.55 to 42.2)    | 38.47<br>(35.32 to 41.97)   | 38.3<br>(35.12 to 41.87)    | 38.27<br>(35.14 to 41.85)   | 38.39<br>(35.32 to 42.02)   | 38.63<br>(35.53 to 42.25)   | 38.94<br>(35.87 to 42.51)  | 39.28<br>(36.14 to 42.8)   |
| Samoa                                         | 16.57<br>(15.24 to 18.07)    | 16.26<br>(14.94 to 17.67)   | 15.98<br>(14.68 to 17.43)   | 15.88<br>(14.58 to 17.33)   | 15.68<br>(14.38 to 17.14)   | 15.17<br>(13.93 to 16.59)   | 14.53<br>(13.37 to 15.9)    | 14.01<br>(12.88 to 15.32)   | 13.46<br>(12.39 to 14.69)  | 13.24<br>(12.18 to 14.43)  |
| Solomon Islands                               | 33.55<br>(30.85 to 36.58)    | 32.57<br>(29.93 to 35.4)    | 31.63<br>(29.06 to 34.49)   | 30.83<br>(28.3 to 33.63)    | 29.74<br>(27.27 to 32.51)   | 28.93<br>(26.56 to 31.63)   | 27.93<br>(25.69 to 30.57)   | 26.9<br>(24.74 to 29.42)    | 25.91<br>(23.86 to 28.28)  | 24.66<br>(22.69 to 26.87)  |
| Tonga                                         | 14.68<br>(13.5 to 16)        | 14.54<br>(13.36 to 15.8)    | 14.43<br>(13.26 to 15.74)   | 14.42<br>(13.24 to 15.74)   | 14.31<br>(13.12 to 15.64)   | 14.26<br>(13.09 to 15.6)    | 14.25<br>(13.11 to 15.6)    | 14.26<br>(13.12 to 15.6)    | 14.27<br>(13.14 to 15.58)  | 14.34<br>(13.19 to 15.62)  |
| Vanuatu                                       | 28.88<br>(26.56 to 31.49)    | 28.26<br>(25.97 to 30.72)   | 27.7<br>(25.45 to 30.21)    | 27.01<br>(24.8 to 29.47)    | 25.88<br>(23.74 to 28.3)    | 25.03<br>(22.98 to 27.37)   | 24.27<br>(22.33 to 26.56)   | 23.7<br>(21.8 to 25.92)     | 23.07<br>(21.25 to 25.18)  | 22.46<br>(20.67 to 24.47)  |
| <b>North Africa and Middle East</b>           | 52.59<br>(45.22 to 61.41)    | 50.53<br>(43.43 to 58.76)   | 48.51<br>(41.79 to 56.48)   | 46.51<br>(40.26 to 53.99)   | 44.34<br>(38.49 to 51.29)   | 42.24<br>(36.77 to 48.81)   | 40.24                       |                             |                            |                            |

Appendix Table 17A. Stillbirth rates (per 1,000 live births) by location, 1970-1979

|                             | 1970                        | 1971                       | 1972                      | 1973                      | 1974                      | 1975                      | 1976                      | 1977                      | 1978                      | 1979                      |
|-----------------------------|-----------------------------|----------------------------|---------------------------|---------------------------|---------------------------|---------------------------|---------------------------|---------------------------|---------------------------|---------------------------|
| Lebanon                     | 29.84<br>(28.17 to 31.67)   | 29.62<br>(27.98 to 31.39)  | 28.73<br>(27.09 to 30.38) | 27.4<br>(25.86 to 28.96)  | 25.76<br>(24.26 to 27.32) | 24.31<br>(22.88 to 25.75) | 23.36<br>(21.97 to 24.75) | 22.27<br>(20.98 to 23.57) | 21.39<br>(20.13 to 22.64) | 20.6<br>(19.41 to 21.81)  |
| Libya                       | 25.92<br>(22.15 to 30.4)    | 24.34<br>(20.83 to 28.46)  | 23.03<br>(19.68 to 26.99) | 21.87<br>(18.67 to 25.51) | 20.8<br>(17.66 to 24.29)  | 19.82<br>(16.84 to 23.15) | 18.79<br>(15.99 to 21.97) | 17.76<br>(15.12 to 20.77) | 16.83<br>(14.31 to 19.66) | 15.92<br>(13.5 to 18.64)  |
| Morocco                     | 52.05<br>(46.93 to 57.88)   | 50.64<br>(45.6 to 56.25)   | 49.36<br>(44.49 to 54.99) | 48.05<br>(43.55 to 53.24) | 46.62<br>(42.27 to 51.52) | 45.13<br>(40.85 to 49.83) | 43.51<br>(39.41 to 47.83) | 41.89<br>(38.01 to 46)    | 40.31<br>(36.64 to 44.18) | 38.75<br>(35.34 to 42.57) |
| Palestine                   | 14.17<br>(12.51 to 16.08)   | 13.55<br>(11.99 to 15.31)  | 13.01<br>(11.55 to 14.76) | 12.86<br>(11.42 to 14.65) | 12.98<br>(11.52 to 14.83) | 13.13<br>(11.68 to 15)    | 13.06<br>(11.6 to 14.86)  | 12.88<br>(11.41 to 14.61) | 12.27<br>(10.87 to 13.91) | 11.66<br>(10.33 to 13.2)  |
| Oman                        | 102.46<br>(95.57 to 110.12) | 97.31<br>(90.84 to 104.47) | 92.38<br>(86.01 to 99.23) | 88.46<br>(82.25 to 94.81) | 83.21<br>(77.64 to 89.37) | 77.81<br>(72.6 to 83.39)  | 71.88<br>(67.11 to 76.84) | 66.99<br>(62.64 to 71.41) | 62.67<br>(58.67 to 67.01) | 58.48<br>(54.7 to 62.32)  |
| Qatar                       | 12.6<br>(9.08 to 17.3)      | 12.78<br>(9.21 to 17.38)   | 12.94<br>(9.34 to 17.76)  | 13.23<br>(9.42 to 18.19)  | 12.32<br>(8.63 to 17.07)  | 11.53<br>(8.16 to 15.84)  | 10.45<br>(7.28 to 14.29)  | 9.54<br>(6.71 to 13)      | 8.79<br>(6.23 to 11.89)   | 7.99<br>(5.72 to 10.68)   |
| Saudi Arabia                | 46.18<br>(34.28 to 61.75)   | 44.55<br>(32.88 to 59.23)  | 42.12<br>(31.32 to 56.29) | 39.96<br>(29.58 to 53.12) | 37.64<br>(28.07 to 49.88) | 36.01<br>(27.02 to 47.78) | 34.48<br>(25.83 to 45.42) | 32.74<br>(24.57 to 42.65) | 31.41<br>(23.58 to 40.68) | 30.3<br>(22.66 to 39.36)  |
| Sudan                       | 46.65<br>(42.16 to 51.75)   | 46.16<br>(41.68 to 51.17)  | 45.95<br>(41.54 to 50.93) | 45.99<br>(41.66 to 50.91) | 45.89<br>(41.52 to 50.86) | 45.55<br>(41.18 to 50.34) | 44.94<br>(40.56 to 49.54) | 44.15<br>(39.87 to 48.76) | 43.56<br>(39.37 to 47.99) | 43.18<br>(38.97 to 47.59) |
| Syria                       | 22.99<br>(19.64 to 26.95)   | 22.35<br>(19.13 to 26.13)  | 21.56<br>(18.44 to 25.23) | 20.95<br>(17.9 to 24.49)  | 20.21<br>(17.18 to 23.58) | 19.36<br>(16.44 to 22.61) | 18.6<br>(15.81 to 21.76)  | 18<br>(15.34 to 21.01)    | 17.43<br>(14.84 to 20.34) | 16.93<br>(14.33 to 19.79) |
| Tunisia                     | 25.43<br>(16.37 to 38.5)    | 24.39<br>(15.97 to 36.48)  | 23.27<br>(15.32 to 34.61) | 22.31<br>(14.64 to 32.63) | 21.3<br>(14.05 to 31.1)   | 20.29<br>(13.5 to 29.08)  | 19.36<br>(12.89 to 27.69) | 18.43<br>(12.3 to 26.78)  | 17.53<br>(11.73 to 25.11) | 16.67<br>(11.27 to 24.12) |
| Turkey                      | 51.02<br>(43.6 to 59.82)    | 48.79<br>(41.75 to 57.03)  | 46.99<br>(40.16 to 55.08) | 45.58<br>(38.91 to 53.15) | 44.02<br>(37.38 to 51.42) | 42.32<br>(35.94 to 49.43) | 40.44<br>(34.41 to 47.28) | 38.57<br>(32.84 to 45.09) | 36.77<br>(31.27 to 42.95) | 34.89<br>(29.58 to 40.84) |
| United Arab Emirates        | 22.67<br>(20.8 to 24.78)    | 21.52<br>(19.71 to 23.52)  | 20.36<br>(18.62 to 22.27) | 19.43<br>(17.77 to 21.21) | 18.33<br>(16.78 to 20.04) | 17.25<br>(15.79 to 18.85) | 16.27<br>(14.95 to 17.73) | 15.29<br>(14.02 to 16.71) | 14.39<br>(13.19 to 15.74) | 13.46<br>(12.35 to 14.73) |
| Yemen                       | 69.48<br>(65.16 to 74.26)   | 67.04<br>(62.88 to 71.61)  | 64.63<br>(60.6 to 69.06)  | 62.19<br>(58.42 to 66.49) | 59.93<br>(56.32 to 64.08) | 57.74<br>(54.22 to 61.64) | 55.15<br>(51.71 to 58.87) | 52.45<br>(49.19 to 55.98) | 49.94<br>(46.83 to 53.35) | 47.74<br>(44.61 to 51.02) |
| South Asia                  | 77.02<br>(71.76 to 82.89)   | 75.21<br>(69.99 to 80.85)  | 73.57<br>(68.63 to 79.13) | 71.86<br>(67.01 to 77.3)  | 70.18<br>(65.48 to 75.3)  | 68.41<br>(63.85 to 73.33) | 66.71<br>(62.4 to 71.4)   | 65<br>(60.82 to 69.47)    | 63.27<br>(59.22 to 67.52) | 61.72<br>(57.77 to 65.79) |
| South Asia                  | 77.02<br>(71.76 to 82.89)   | 75.21<br>(69.99 to 80.85)  | 73.57<br>(68.63 to 79.13) | 71.86<br>(67.01 to 77.3)  | 70.18<br>(65.48 to 75.3)  | 68.41<br>(63.85 to 73.33) | 66.71<br>(62.4 to 71.4)   | 65<br>(60.82 to 69.47)    | 63.27<br>(59.22 to 67.52) | 61.72<br>(57.77 to 65.79) |
| Bangladesh                  | 82.28<br>(77.39 to 87.68)   | 80.88<br>(76.05 to 86.19)  | 79.92<br>(75.27 to 85.28) | 79.27<br>(74.76 to 84.59) | 78.39<br>(74.01 to 83.52) | 77.61<br>(73.24 to 82.64) | 76.49<br>(72.19 to 81.27) | 75.24<br>(71 to 79.74)    | 73.85<br>(69.68 to 78.17) | 72.27<br>(68.2 to 76.49)  |
| Bhutan                      | 93.75<br>(90.79 to 96.95)   | 91.19<br>(88.35 to 94.24)  | 88.96<br>(86.14 to 91.95) | 87<br>(84.17 to 89.91)    | 85.11<br>(82.38 to 87.99) | 83.56<br>(80.86 to 86.41) | 81.87<br>(79.18 to 84.61) | 80.1<br>(77.57 to 82.79)  | 78.28<br>(75.76 to 80.9)  | 76.42<br>(73.94 to 78.97) |
| India                       | 76.32<br>(70.65 to 82.65)   | 74.41<br>(68.79 to 80.54)  | 72.66<br>(67.3 to 78.69)  | 70.78<br>(65.5 to 76.59)  | 68.96<br>(63.9 to 74.51)  | 67<br>(62.14 to 72.46)    | 65.16<br>(60.56 to 70.3)  | 63.32<br>(58.79 to 68.15) | 61.47<br>(57.05 to 66.03) | 59.84<br>(55.6 to 64.23)  |
| Nepal                       | 81.99<br>(77.58 to 86.85)   | 80.64<br>(76.22 to 85.36)  | 79.26<br>(75.02 to 83.94) | 78.04<br>(73.81 to 82.6)  | 76.65<br>(72.59 to 81.08) | 75.34<br>(71.36 to 79.72) | 74.04<br>(70.22 to 78.21) | 72.66<br>(68.81 to 76.65) | 71.17<br>(67.41 to 74.97) | 69.51<br>(65.9 to 73.18)  |
| Pakistan                    | 76.07<br>(73.41 to 78.95)   | 74.55<br>(71.99 to 77.3)   | 73.18<br>(70.6 to 75.89)  | 71.84<br>(69.33 to 74.48) | 70.55<br>(68.07 to 73.16) | 69.4<br>(66.92 to 71.96)  | 68.18<br>(65.79 to 70.73) | 67.02<br>(64.67 to 69.49) | 65.81<br>(63.58 to 68.17) | 64.66<br>(62.37 to 66.94) |
| Sub-Saharan Africa          | 50.68<br>(47.13 to 54.76)   | 49.95<br>(46.47 to 53.89)  | 49.18<br>(45.8 to 53.06)  | 48.37<br>(45.15 to 52.2)  | 47.55<br>(44.48 to 51.26) | 46.87<br>(43.9 to 50.52)  | 46.2<br>(43.28 to 49.73)  | 45.44<br>(42.67 to 48.77) | 44.72<br>(41.98 to 47.9)  | 44.05<br>(41.4 to 47.01)  |
| Southern Sub-Saharan Africa | 29.75<br>(26.2 to 33.88)    | 29.12<br>(25.62 to 33.1)   | 28.5<br>(25.14 to 32.54)  | 27.92<br>(24.66 to 31.67) | 27.33<br>(24.22 to 30.98) | 26.85<br>(23.82 to 30.37) | 26.44<br>(23.48 to 29.91) | 26.1<br>(23.24 to 29.38)  | 25.7<br>(23 to 28.7)      | 25.25<br>(22.66 to 28.17) |
| Botswana                    | 33.57<br>(28.1 to 40.13)    | 32.42<br>(27.23 to 38.61)  | 31.23<br>(26.1 to 37.21)  | 30.1<br>(25.2 to 35.82)   | 28.97<br>(24.21 to 34.51) | 27.87<br>(23.24 to 33.18) | 26.87<br>(22.47 to 32.04) | 26.03<br>(21.77 to 30.98) | 25.27<br>(21.26 to 29.9)  | 24.49<br>(20.45 to 28.93) |
| Lesotho                     | 30.85<br>(28.25 to 33.77)   | 30.83<br>(28.21 to 33.68)  | 30.68<br>(28.15 to 33.61) | 30.28<br>(27.83 to 33.25) | 29.93<br>(27.53 to 32.85) | 29.78<br>(27.44 to 32.68) | 29.64<br>(27.29 to 32.48) | 29.39<br>(27.08 to 32.14) | 28.95<br>(26.65 to 31.65) | 28.83<br>(26.56 to 31.5)  |
| Namibia                     | 25.59<br>(21.24 to 30.84)   | 25.33<br>(21.08 to 30.46)  | 25.1<br>(20.88 to 30.38)  | 24.9<br>(20.71 to 30.13)  | 24.71<br>(20.54 to 29.88) | 24.56<br>(20.38 to 29.71) | 24.51<br>(20.29 to 29.58) | 24.46<br>(20.17 to 29.45) | 24.5<br>(20.08 to 29.59)  | 24.6<br>(20.12 to 29.58)  |
| South Africa                | 29.6<br>(26.55 to 33.08)    | 28.9<br>(25.88 to 32.27)   | 28.23<br>(25.31 to 31.51) | 27.59<br>(24.8 to 30.74)  | 26.96<br>(24.22 to 29.96) | 26.43<br>(23.79 to 29.43) | 25.98<br>(23.38 to 28.87) | 25.59<br>(23.06 to 28.27) | 25.12<br>(22.65 to 27.75) | 24.58<br>(22.15 to 27.26) |
| Swaziland                   | 35.49<br>(30.12 to 41.89)   | 33.99<br>(28.8 to 40.05)   | 32.44<br>(27.54 to 38.22) | 31.06<br>(26.45 to 36.53) | 29.79<br>(25.32 to 35.1)  | 28.4<br>(24.12 to 33.31)  | 27.09<br>(22.93 to 31.6)  | 25.91<br>(21.96 to 30.37) | 24.86<br>(21.1 to 29.02)  | 23.9<br>(20.24 to 27.91)  |
| Zimbabwe                    | 29.62<br>(24.83 to 35.37)   | 29.21<br>(24.49 to 34.86)  | 28.76<br>(24.13 to 34.36) | 28.39<br>(23.79 to 33.86) | 28<br>(23.47 to 33.47)    | 27.69<br>(23.28 to 33.2)  | 27.45<br>(23.07 to 32.85) | 27.37<br>(23.14 to 32.7)  | 27.21<br>(22.92 to 32.48) | 26.99<br>(22.76 to 32.13) |
| Western Sub-Saharan Africa  | 56.28<br>(50.5 to 63.01)    | 55.46<br>(49.82 to 62.04)  | 54.6<br>(49.09 to 61.07)  | 53.62<br>(48.31 to 60.04) | 52.55<br>(47.62 to 58.82) | 51.66<br>(46.75 to 57.77) | 50.77<br>(45.94 to 56.77) | 49.74<br>(45.08 to 55.28) | 48.74<br>(44.15 to 53.95) | 47.87<br>(43.5 to 52.75)  |
| Benin                       | 47.88<br>(44.2 to 52)       | 46.95<br>(43.33 to 50.95)  | 45.86<br>(42.36 to 49.73) | 44.6<br>(41.06 to 48.34)  | 43.38<br>(39.86 to 47.02) | 42.48<br>(39 to 46.05)    | 41.58<br>(38.15 to 45.08) | 40.65<br>(37.37 to 44.1)  | 39.75<br>(36.56 to 43.17) | 38.76<br>(35.69 to 42.07) |
| Burkina Faso                | 40.74<br>(37.2 to 44.74)    | 40.31<br>(36.85 to 44.15)  | 39.66<br>(36.27 to 43.3)  | 39.13<br>(35.7 to 42.75)  | 38.5<br>(35.14 to 42.04)  | 37.87<br>(34.47 to 41.36) | 37.26<br>(33.91 to 40.69) | 36.53<br>(33.23 to 39.86) | 35.56<br>(32.37 to 38.7)  | 34.54<br>(31.46 to 37.65) |
| Cameroon                    | 42.48<br>(39.75 to 45.5)    | 41.51<br>(38.84 to 44.42)  | 40.58<br>(37.99 to 43.55) | 39.7<br>(37.2 to 42.62)   | 38.79<br>(36.37 to 41.66) | 37.89<br>(35.48 to 40.69) | 37.16<br>(34.84 to 39.91) | 36.34<br>(34.03 to 39.05) | 35.4<br>(33.09 to 38.03)  | 34.54<br>(32.31 to 37.04) |
| Cape Verde                  | 27.92<br>(24.14 to 32.76)   | 28.65<br>(24.87 to 33.48)  | 25.74<br>(22.4 to 30.1)   | 24.17<br>(21.08 to 28.22) | 22.03<br>(19.19 to 25.53) | 21.16<br>(18.46 to 24.39) | 19.72<br>(17.31 to 22.6)  | 18.33<br>(16.16 to 20.74) | 16.98<br>(15.02 to 19.04) | 15.78<br>(14.03 to 17.58) |
| Chad                        | 65.93<br>(63.94 to 68.08)   | 64<br>(62.09 to 66.08)     | 63.21<br>(61.29 to 65.26) | 62.75<br>(60.9 to 64.82)  | 62.03<br>(60.22 to 64.07) | 61.06<br>(59.26 to 63.02) | 60.04<br>(58.23 to 61.95) | 59.09<br>(57.3 to 60.96)  | 58.18<br>(56.42 to 60.05) | 58.04<br>(56.2 to 59.95)  |
| Cote d'Ivoire               | 50.22<br>(49.05 to 51.47)   | 48.76<br>(47.63 to 49.97)  | 47.3<br>(46.2 to 48.47)   | 45.76<br>(44.72 to 46.9)  | 44.24<br>(43.24 to 45.35) | 42.91<br>(41.93 to 43.96) | 41.47<br>(40.5 to 42.49)  | 39.97<br>(39.04 to 40.95) | 38.56<br>(37.66 to 39.51) | 37.31<br>(36.39 to 38.24) |
| The Gambia                  | 60.79<br>(58.99 to 62.73)   | 59.43<br>(57.68 to 61.31)  | 58.07<br>(56.35 to 59.91) | 56.96<br>(55.32 to 58.78) | 55.73<br>(54.14 to 57.52) | 54.46<br>(52.88 to 56.17) | 53.25<br>(51.66 to 54.92) | 52.02<br>(50.49 to 53.64) | 50.8<br>(49.3 to 52.41)   | 49.53<br>(47.98 to 51.11) |
| Ghana                       | 37.4<br>(33.43 to 41.94)    | 36.55<br>(32.72 to 40.92)  | 35.86<br>(32 to 40.14)    | 35.1<br>(31.42 to 39.23)  | 34.25<br>(30.7 to 38.22)  | 33.58<br>(29.93 to 37.49) | 33.07<br>(29.5 to 36.94)  | 32.47<br>(28.9 to 36.29)  | 31.77<br>(28.21 to 35.56) | 31.23<br>(27.74 to 34.89) |
| Guinea                      | 47.96<br>(46.4 to 49.65)    | 47.74<br>(46.19 to 49.4)   | 47.43<br>(45.88 to 49.09) | 47.1<br>(45.6 to 48.75)   | 46.67<br>(45.2 to 48.32)  | 46.19<br>(44.72 to 47.78) | 45.55<br>(44.06 to 47.12) | 44.98<br>(43.52 to 46.53) | 44.27<br>(42.82 to 45.81) | 43.59<br>(42.1 to 45.13)  |
| Guinea-Bissau               | 65.51<br>(61.3 to 70.16)    | 64.47<br>(60.34 to 68.99)  | 63.42<br>(59.32 to 68.04) | 62.46<br>(58.37 to 67.11) | 61.52<br>(57.51 to 65.96) | 60.58<br>(56.63 to 65.04) | 59.42<br>(55.58 to 63.85) | 58.68<br>(54.92 to 63.01) | 57.68<br>(54.05 to 61.83) | 56.75<br>(53.16 to 60.74) |
| Liberia                     | 67.75<br>(63.41 to 72.57)   | 66.31<br>(62.06 to 70.95)  | 64.93<br>(60.73 to 69.66) | 63.59<br>(59.43 to 68.33) | 62.18<br>(58.13 to 66.67) | 60.84<br>(56.87 to 65.32) | 59.48<br>(55.63 to 63.91) | 58.24<br>(54.5 to 62.54)  | 56.99<br>(53.4 to 61.09)  | 55.73<br>(52.2 to 59.65)  |
| Mali                        | 76.09<br>(71.2 to 81.5)     | 74.94<br>(70.14 to 80.21)  | 73.84<br>(69.13 to 79.23) | 72.74<br>(68.16 to 78.1)  | 71.77<br>(67.29 to 77.08) | 70.54<br>(66.05 to 75.76) | 68.98<br>(64.68 to 74.1)  | 67.39<br>(63.1 to 72.41)  | 65.96<br>(61.65 to 70.86) | 64.27<br>(60.12 to 68.93) |
| Mauritania                  | 38.62<br>(37.65 to 39.66)   | 38.09<br>(37.15 to 39.11)  | 37.74<br>(36.79 to 38.75) | 37.47<br>(36.56 to 38.48) | 37.11<br>(36.21 to 38.11) | 36.69<br>(35.79 to 37.65) | 36.14<br>(35.23 to 37.09) | 35.58<br>(34.69 to 36.52) | 35.13<br>(34.25 to 36.07) | 34.6<br>(33.68 to 35.53)  |
| Niger                       | 52.58<br>(50.89 to 54.41)   | 52.35<br>(50.69 to 54.12)  | 52.3<br>(50.68 to 54.11)  | 52.53<br>(50.91 to 54.42) | 52.53<br>(50.9 to 54.44)  | 52.67<br>(51.04 to 54.57) | 52.64<br>(51.01 to 54.53) | 52.34<br>(50.67 to 54.17) | 51.82<br>(50.16 to 53.64) | 51.11<br>(49.47 to 52.88) |
| Nigeria                     | 62.51<br>(54.12 to 72.35)   | 61.74<br>(53.5 to 71.38)   | 60.85<br>(52.81 to 70.54) | 59.62<br>(51.95 to 69.12) | 58.3<br>(50.95 to 67.5)   | 57.28<br>(49.94 to 66.44) | 56.31<br>(49 to 65.11)    | 55.11<br>(47.86 to 63.33) | 54.02<br>(46.97 to 61.69) | 53.18<br>(46.23 to 60.7)  |
| Sao Tome and Principe       | 22.05<br>(20.64 to 23.62)   | 21.12<br>(19.77 to 22.6)   | 20.37<br>(19.05 to 21.86) | 19.67<br>(18.38 to 21.13) | 19.06<br>(17.82 to 20.43) | 18.49<br>(17.29 to 19.85) | 18.01<br>(16.84 to 19.35) | 17.5<br>(16.37 to 18.79)  | 17.25<br>(16.16 to 18.53) |                           |

Appendix Table 17A. Stillbirth rates (per 1,000 live births) by location, 1970-1979

|                                   | 1970                      | 1971                      | 1972                      | 1973                      | 1974                      | 1975                      | 1976                      | 1977                      | 1978                      | 1979                      |
|-----------------------------------|---------------------------|---------------------------|---------------------------|---------------------------|---------------------------|---------------------------|---------------------------|---------------------------|---------------------------|---------------------------|
| Kenya                             | 44.14<br>(41.46 to 47.1)  | 43.47<br>(40.84 to 46.36) | 42.68<br>(40.13 to 45.58) | 41.87<br>(39.43 to 44.71) | 40.96<br>(38.63 to 43.71) | 40.2<br>(37.88 to 42.94)  | 39.5<br>(37.18 to 42.13)  | 38.66<br>(36.35 to 41.12) | 37.85<br>(35.61 to 40.14) | 37.15<br>(34.95 to 39.4)  |
| Madagascar                        | 38.51<br>(36.47 to 40.76) | 37.75<br>(35.75 to 39.93) | 36.78<br>(34.82 to 38.91) | 36.37<br>(34.48 to 38.49) | 36.43<br>(34.56 to 38.57) | 36.93<br>(35.01 to 39.04) | 37.43<br>(35.43 to 39.57) | 37.42<br>(35.43 to 39.55) | 37.1<br>(35.13 to 39.24)  | 36.77<br>(34.71 to 38.92) |
| Malawi                            | 60.11<br>(58.76 to 61.56) | 58.79<br>(57.48 to 60.19) | 57.32<br>(56.04 to 58.7)  | 55.97<br>(54.75 to 57.32) | 54.56<br>(53.38 to 55.88) | 53.1<br>(51.93 to 54.36)  | 51.69<br>(50.53 to 52.92) | 50.28<br>(49.16 to 51.47) | 48.69<br>(47.59 to 49.85) | 47.07<br>(45.95 to 48.2)  |
| Mozambique                        | 61.69<br>(58.41 to 65.28) | 60.8<br>(57.62 to 64.23)  | 59.86<br>(56.78 to 63.3)  | 59.09<br>(55.93 to 62.43) | 58.4<br>(55.23 to 61.72)  | 57.95<br>(54.75 to 61.24) | 57.54<br>(54.36 to 60.81) | 56.92<br>(53.82 to 60.09) | 56.5<br>(53.44 to 59.71)  | 56.19<br>(53.02 to 59.37) |
| Rwanda                            | 48.46<br>(44.4 to 53.04)  | 48.29<br>(44.25 to 52.87) | 48.04<br>(44.1 to 52.48)  | 47.7<br>(43.73 to 52.15)  | 47.51<br>(43.56 to 51.83) | 47.28<br>(43.23 to 51.59) | 46.6<br>(42.7 to 50.75)   | 45.7<br>(41.82 to 49.76)  | 44.51<br>(40.74 to 48.48) | 42.67<br>(39.02 to 46.51) |
| Somalia                           | 46.36<br>(43.9 to 49.06)  | 46.26<br>(43.84 to 48.87) | 45.84<br>(43.48 to 48.48) | 45.65<br>(43.21 to 48.23) | 45.79<br>(43.3 to 48.39)  | 45.42<br>(42.91 to 48)    | 45.27<br>(42.77 to 47.85) | 44.84<br>(42.4 to 47.35)  | 44.46<br>(42.05 to 46.98) | 44.4<br>(41.89 to 46.91)  |
| South Sudan                       | 93.01<br>(91.03 to 95.13) | 92.18<br>(90.23 to 94.27) | 91.45<br>(89.5 to 93.52)  | 90.68<br>(88.79 to 92.75) | 89.79<br>(87.94 to 91.86) | 89.11<br>(87.25 to 91.11) | 88.41<br>(86.52 to 90.4)  | 87.66<br>(85.79 to 89.61) | 86.98<br>(85.13 to 88.95) | 86.31<br>(84.37 to 88.28) |
| Tanzania                          | 42.26<br>(41.11 to 43.5)  | 41.5<br>(40.37 to 42.71)  | 40.74<br>(39.63 to 41.94) | 40.04<br>(38.97 to 41.21) | 39.34<br>(38.3 to 40.5)   | 38.62<br>(37.59 to 39.73) | 37.83<br>(36.79 to 38.91) | 37.14<br>(36.13 to 38.21) | 36.54<br>(35.54 to 37.61) | 35.96<br>(34.93 to 37.02) |
| Uganda                            | 40.45<br>(40.03 to 40.9)  | 40.01<br>(39.59 to 40.45) | 39.48<br>(39.06 to 39.92) | 38.99<br>(38.59 to 39.43) | 38.64<br>(38.25 to 39.07) | 38.33<br>(37.93 to 38.75) | 37.98<br>(37.58 to 38.4)  | 37.61<br>(37.21 to 38.02) | 37.33<br>(36.94 to 37.75) | 37.25<br>(36.84 to 37.67) |
| Zambia                            | 38.55<br>(36.5 to 40.8)   | 37.67<br>(35.7 to 39.8)   | 36.66<br>(34.77 to 38.77) | 35.76<br>(33.85 to 37.78) | 35.01<br>(33.11 to 37.01) | 34.43<br>(32.54 to 36.39) | 33.82<br>(31.95 to 35.74) | 33.59<br>(31.76 to 35.47) | 33.45<br>(31.64 to 35.35) | 33.13<br>(31.26 to 35)    |
| <b>Central Sub-Saharan Africa</b> | 54.34<br>(52.71 to 56.1)  | 53.62<br>(52.01 to 55.31) | 53.05<br>(51.51 to 54.74) | 52.27<br>(50.77 to 53.96) | 51.39<br>(49.92 to 53.07) | 50.88<br>(49.48 to 52.52) | 50.26<br>(48.88 to 51.84) | 49.42<br>(48.08 to 50.92) | 48.71<br>(47.37 to 50.19) | 47.95<br>(46.65 to 49.39) |
| Angola                            | 57.44<br>(54.95 to 60.15) | 56.87<br>(54.43 to 59.48) | 56.41<br>(54.06 to 59.07) | 55.83<br>(53.52 to 58.56) | 55.3<br>(52.98 to 58.03)  | 55.2<br>(52.91 to 57.92)  | 55.34<br>(53.02 to 58.04) | 55.01<br>(52.65 to 57.63) | 54.57<br>(52.22 to 57.18) | 54.12<br>(51.79 to 56.68) |
| Central African Republic          | 61.24<br>(57.57 to 65.3)  | 61.2<br>(57.5 to 65.14)   | 61.51<br>(57.77 to 65.54) | 61.64<br>(57.91 to 65.68) | 61.78<br>(58.03 to 65.95) | 61.76<br>(58.1 to 65.85)  | 61.37<br>(57.71 to 65.45) | 60.58<br>(57.03 to 64.62) | 59.68<br>(56.21 to 63.57) | 58.87<br>(55.46 to 62.63) |
| Congo                             | 44.29<br>(41.63 to 47.22) | 43.35<br>(40.75 to 46.18) | 42.4<br>(39.84 to 45.28)  | 41.36<br>(38.83 to 44.21) | 40.17<br>(37.72 to 42.87) | 39.02<br>(36.64 to 41.7)  | 37.88<br>(35.58 to 40.5)  | 36.89<br>(34.68 to 39.43) | 35.96<br>(33.85 to 38.38) | 34.94<br>(32.87 to 37.23) |
| Democratic Republic of the Congo  | 53.25<br>(52.17 to 54.4)  | 52.49<br>(51.43 to 53.62) | 51.91<br>(50.85 to 53.03) | 51.05<br>(50.04 to 52.16) | 50.05<br>(49.07 to 51.15) | 49.46<br>(48.48 to 50.52) | 48.67<br>(47.67 to 49.71) | 47.68<br>(46.71 to 48.69) | 46.91<br>(45.95 to 47.92) | 46.06<br>(45.07 to 47.06) |
| Equatorial Guinea                 | 72.64<br>(68.28 to 77.45) | 71.52<br>(67.19 to 76.13) | 70.4<br>(66.13 to 75.01)  | 69<br>(64.82 to 73.52)    | 67.38<br>(63.29 to 71.93) | 65.28<br>(61.41 to 69.61) | 63.09<br>(59.33 to 67.28) | 60.85<br>(57.29 to 64.9)  | 58.96<br>(55.53 to 62.81) | 57.46<br>(54.14 to 61.14) |
| Gabon                             | 53.78<br>(50.56 to 57.34) | 52.2<br>(49.07 to 55.6)   | 50.65<br>(47.59 to 54.09) | 49<br>(45.99 to 52.36)    | 46.77<br>(43.93 to 49.92) | 44.73<br>(42 to 47.79)    | 42.45<br>(39.88 to 45.39) | 40.86<br>(38.41 to 43.67) | 39.67<br>(37.34 to 42.34) | 38.43<br>(36.16 to 40.95) |

Appendix Table 17B. Stillbirth rates (per 1,000 live births) by location, 1980-1995

|                                                         | 1980   | 1981   | 1982   | 1983   | 1984   | 1985   | 1986   | 1987   | 1988   | 1989   | 1990   | 1991   | 1992   | 1993   | 1994   | 1995   |
|---------------------------------------------------------|--------|--------|--------|--------|--------|--------|--------|--------|--------|--------|--------|--------|--------|--------|--------|--------|
| <b>Global</b>                                           | 33.2   | 32.8   | 30.9   | 30.9   | 29.9   | 29.2   | 28.9   | 28.1   | 27.1   | 25.1   | 24.1   | 23.1   | 22.1   | 21.1   | 20.1   | 19.1   |
| <b>High SDI</b>                                         | 18.32  | 17.47  | 15.74  | 15.37  | 14.26  | 13.57  | 12.84  | 12.22  | 11.58  | 10.82  | 10.14  | 9.48   | 8.84   | 8.21   | 7.59   | 7.00   |
| <b>High-mortality SDI</b>                               | 115.91 | 115.90 | 115.82 | 115.82 | 115.82 | 115.82 | 115.82 | 115.82 | 115.82 | 115.82 | 115.82 | 115.82 | 115.82 | 115.82 | 115.82 | 115.82 |
| <b>Low-mortality SDI</b>                                | 27.64  | 28.34  | 27.48  | 26.45  | 25.49  | 24.55  | 23.62  | 22.76  | 21.95  | 21.22  | 20.39  | 19.54  | 18.78  | 18.04  | 17.31  | 16.58  |
| <b>Low SDI</b>                                          | 58.76  | 57.19  | 55.06  | 53.52  | 51.87  | 50.22  | 48.57  | 46.92  | 45.27  | 43.62  | 41.97  | 40.32  | 38.67  | 37.02  | 35.37  | 33.72  |
| <b>High-income</b>                                      | 5.31   | 5.06   | 4.75   | 4.50   | 4.25   | 4.00   | 3.75   | 3.50   | 3.25   | 3.00   | 2.75   | 2.50   | 2.25   | 2.00   | 1.75   | 1.50   |
| <b>High-income North America</b>                        | 4.39   | 4.14   | 3.89   | 3.64   | 3.39   | 3.14   | 2.89   | 2.64   | 2.39   | 2.14   | 1.89   | 1.64   | 1.39   | 1.14   | 0.89   | 0.64   |
| <b>Canada</b>                                           | 3.96   | 3.71   | 3.46   | 3.21   | 2.96   | 2.71   | 2.46   | 2.21   | 1.96   | 1.71   | 1.46   | 1.21   | 0.96   | 0.71   | 0.46   | 0.21   |
| <b>Greenland</b>                                        | 12.21  | 12.21  | 12.21  | 12.21  | 12.21  | 12.21  | 12.21  | 12.21  | 12.21  | 12.21  | 12.21  | 12.21  | 12.21  | 12.21  | 12.21  | 12.21  |
| <b>United States</b>                                    | 4.4    | 4.1    | 3.8    | 3.5    | 3.2    | 2.9    | 2.6    | 2.3    | 2.0    | 1.7    | 1.4    | 1.1    | 0.8    | 0.5    | 0.2    | 0.0    |
| <b>Australia</b>                                        | 4.49   | 4.19   | 3.89   | 3.59   | 3.29   | 2.99   | 2.69   | 2.39   | 2.09   | 1.79   | 1.49   | 1.19   | 0.89   | 0.59   | 0.29   | 0.0    |
| <b>Australia (excl. NT)</b>                             | 4.49   | 4.19   | 3.89   | 3.59   | 3.29   | 2.99   | 2.69   | 2.39   | 2.09   | 1.79   | 1.49   | 1.19   | 0.89   | 0.59   | 0.29   | 0.0    |
| <b>Australia (incl. NT)</b>                             | 4.49   | 4.19   | 3.89   | 3.59   | 3.29   | 2.99   | 2.69   | 2.39   | 2.09   | 1.79   | 1.49   | 1.19   | 0.89   | 0.59   | 0.29   | 0.0    |
| <b>New Zealand</b>                                      | 5.56   | 5.27   | 5.02   | 4.77   | 4.52   | 4.27   | 4.02   | 3.77   | 3.52   | 3.27   | 3.02   | 2.77   | 2.52   | 2.27   | 2.02   | 1.77   |
| <b>High-income Asia Pacific</b>                         | 11.4   | 10.4   | 9.4    | 8.4    | 7.4    | 6.4    | 5.4    | 4.4    | 3.4    | 2.4    | 1.4    | 0.4    | 0.0    | 0.0    | 0.0    | 0.0    |
| <b>Brunei</b>                                           | 11.4   | 10.4   | 9.4    | 8.4    | 7.4    | 6.4    | 5.4    | 4.4    | 3.4    | 2.4    | 1.4    | 0.4    | 0.0    | 0.0    | 0.0    | 0.0    |
| <b>Japan</b>                                            | 6.12   | 5.49   | 4.86   | 4.23   | 3.60   | 2.97   | 2.34   | 1.71   | 1.08   | 0.45   | 0.0    | 0.0    | 0.0    | 0.0    | 0.0    | 0.0    |
| <b>Singapore</b>                                        | 8.1    | 7.7    | 7.3    | 6.9    | 6.5    | 6.1    | 5.7    | 5.3    | 4.9    | 4.5    | 4.1    | 3.7    | 3.3    | 2.9    | 2.5    | 2.1    |
| <b>South Korea</b>                                      | 8.26   | 8.46   | 8.66   | 8.86   | 9.06   | 9.26   | 9.46   | 9.66   | 9.86   | 10.06  | 10.26  | 10.46  | 10.66  | 10.86  | 11.06  | 11.26  |
| <b>Western Europe</b>                                   | 5.49   | 5.24   | 4.99   | 4.74   | 4.49   | 4.24   | 3.99   | 3.74   | 3.49   | 3.24   | 2.99   | 2.74   | 2.49   | 2.24   | 1.99   | 1.74   |
| <b>Andorra</b>                                          | 15.71  | 15.76  | 15.81  | 15.86  | 15.91  | 15.96  | 16.01  | 16.06  | 16.11  | 16.16  | 16.21  | 16.26  | 16.31  | 16.36  | 16.41  | 16.46  |
| <b>Austria</b>                                          | 3.62   | 3.42   | 3.22   | 3.02   | 2.82   | 2.62   | 2.42   | 2.22   | 2.02   | 1.82   | 1.62   | 1.42   | 1.22   | 1.02   | 0.82   | 0.62   |
| <b>Belgium</b>                                          | 5.79   | 5.59   | 5.39   | 5.19   | 4.99   | 4.79   | 4.59   | 4.39   | 4.19   | 3.99   | 3.79   | 3.59   | 3.39   | 3.19   | 2.99   | 2.79   |
| <b>Cyprus</b>                                           | 7.91   | 7.59   | 7.27   | 6.95   | 6.63   | 6.31   | 5.99   | 5.67   | 5.35   | 5.03   | 4.71   | 4.39   | 4.07   | 3.75   | 3.43   | 3.11   |
| <b>Denmark</b>                                          | 2.92   | 2.81   | 2.70   | 2.59   | 2.48   | 2.37   | 2.26   | 2.15   | 2.04   | 1.93   | 1.82   | 1.71   | 1.60   | 1.49   | 1.38   | 1.27   |
| <b>Finland</b>                                          | 2.52   | 2.42   | 2.31   | 2.20   | 2.10   | 1.99   | 1.88   | 1.77   | 1.66   | 1.55   | 1.44   | 1.33   | 1.22   | 1.11   | 1.00   | 0.89   |
| <b>France</b>                                           | 3.16   | 3.06   | 2.96   | 2.86   | 2.76   | 2.66   | 2.56   | 2.46   | 2.36   | 2.26   | 2.16   | 2.06   | 1.96   | 1.86   | 1.76   | 1.66   |
| <b>Germany</b>                                          | 3.16   | 3.06   | 2.96   | 2.86   | 2.76   | 2.66   | 2.56   | 2.46   | 2.36   | 2.26   | 2.16   | 2.06   | 1.96   | 1.86   | 1.76   | 1.66   |
| <b>Greece</b>                                           | 6.68   | 6.22   | 5.76   | 5.30   | 4.84   | 4.38   | 3.92   | 3.46   | 3.00   | 2.54   | 2.08   | 1.62   | 1.16   | 0.70   | 0.24   | 0.0    |
| <b>Iceland</b>                                          | 2.62   | 2.52   | 2.42   | 2.32   | 2.22   | 2.12   | 2.02   | 1.92   | 1.82   | 1.72   | 1.62   | 1.52   | 1.42   | 1.32   | 1.22   | 1.12   |
| <b>Ireland</b>                                          | 4.97   | 4.79   | 4.61   | 4.43   | 4.25   | 4.07   | 3.89   | 3.71   | 3.53   | 3.35   | 3.17   | 2.99   | 2.81   | 2.63   | 2.45   | 2.27   |
| <b>Italy</b>                                            | 3.64   | 3.54   | 3.44   | 3.34   | 3.24   | 3.14   | 3.04   | 2.94   | 2.84   | 2.74   | 2.64   | 2.54   | 2.44   | 2.34   | 2.24   | 2.14   |
| <b>Israel</b>                                           | 5.23   | 5.03   | 4.83   | 4.63   | 4.43   | 4.23   | 4.03   | 3.83   | 3.63   | 3.43   | 3.23   | 3.03   | 2.83   | 2.63   | 2.43   | 2.23   |
| <b>Luxembourg</b>                                       | 3.06   | 2.96   | 2.86   | 2.76   | 2.66   | 2.56   | 2.46   | 2.36   | 2.26   | 2.16   | 2.06   | 1.96   | 1.86   | 1.76   | 1.66   | 1.56   |
| <b>Malta</b>                                            | 5.48   | 5.28   | 5.08   | 4.88   | 4.68   | 4.48   | 4.28   | 4.08   | 3.88   | 3.68   | 3.48   | 3.28   | 3.08   | 2.88   | 2.68   | 2.48   |
| <b>Netherlands</b>                                      | 4.29   | 4.19   | 4.09   | 3.99   | 3.89   | 3.79   | 3.69   | 3.59   | 3.49   | 3.39   | 3.29   | 3.19   | 3.09   | 2.99   | 2.89   | 2.79   |
| <b>Norway</b>                                           | 3.16   | 3.06   | 2.96   | 2.86   | 2.76   | 2.66   | 2.56   | 2.46   | 2.36   | 2.26   | 2.16   | 2.06   | 1.96   | 1.86   | 1.76   | 1.66   |
| <b>Sweden</b>                                           | 2.86   | 2.76   | 2.66   | 2.56   | 2.46   | 2.36   | 2.26   | 2.16   | 2.06   | 1.96   | 1.86   | 1.76   | 1.66   | 1.56   | 1.46   | 1.36   |
| <b>Switzerland</b>                                      | 2.86   | 2.76   | 2.66   | 2.56   | 2.46   | 2.36   | 2.26   | 2.16   | 2.06   | 1.96   | 1.86   | 1.76   | 1.66   | 1.56   | 1.46   | 1.36   |
| <b>United Kingdom</b>                                   | 7.36   | 7.16   | 6.96   | 6.76   | 6.56   | 6.36   | 6.16   | 5.96   | 5.76   | 5.56   | 5.36   | 5.16   | 4.96   | 4.76   | 4.56   | 4.36   |
| <b>England</b>                                          | 7.36   | 7.16   | 6.96   | 6.76   | 6.56   | 6.36   | 6.16   | 5.96   | 5.76   | 5.56   | 5.36   | 5.16   | 4.96   | 4.76   | 4.56   | 4.36   |
| <b>Scotland</b>                                         | 11.28  | 11.28  | 11.28  | 11.28  | 11.28  | 11.28  | 11.28  | 11.28  | 11.28  | 11.28  | 11.28  | 11.28  | 11.28  | 11.28  | 11.28  | 11.28  |
| <b>North Ireland</b>                                    | 11.28  | 11.28  | 11.28  | 11.28  | 11.28  | 11.28  | 11.28  | 11.28  | 11.28  | 11.28  | 11.28  | 11.28  | 11.28  | 11.28  | 11.28  | 11.28  |
| <b>Wales</b>                                            | 11.28  | 11.28  | 11.28  | 11.28  | 11.28  | 11.28  | 11.28  | 11.28  | 11.28  | 11.28  | 11.28  | 11.28  | 11.28  | 11.28  | 11.28  | 11.28  |
| <b>Southern Latin America</b>                           | 10.26  | 9.86   | 9.46   | 9.06   | 8.66   | 8.26   | 7.86   | 7.46   | 7.06   | 6.66   | 6.26   | 5.86   | 5.46   | 5.06   | 4.66   | 4.26   |
| <b>Argentina</b>                                        | 10.26  | 9.86   | 9.46   | 9.06   | 8.66   | 8.26   | 7.86   | 7.46   | 7.06   | 6.66   | 6.26   | 5.86   | 5.46   | 5.06   | 4.66   | 4.26   |
| <b>Chile</b>                                            | 9.26   | 8.86   | 8.46   | 8.06   | 7.66   | 7.26   | 6.86   | 6.46   | 6.06   | 5.66   | 5.26   | 4.86   | 4.46   | 4.06   | 3.66   | 3.26   |
| <b>Uruguay</b>                                          | 11.28  | 11.28  | 11.28  | 11.28  | 11.28  | 11.28  | 11.28  | 11.28  | 11.28  | 11.28  | 11.28  | 11.28  | 11.28  | 11.28  | 11.28  | 11.28  |
| <b>Central Europe, Eastern Europe, and Central Asia</b> | 10.26  | 9.86   | 9.46   | 9.06   | 8.66   | 8.26   | 7.86   | 7.46   | 7.06   | 6.66   | 6.26   | 5.86   | 5.46   | 5.06   | 4.66   | 4.26   |
| <b>Belarus</b>                                          | 8.76   | 8.36   | 7.96   | 7.56   | 7.16   | 6.76   | 6.36   | 5.96   | 5.56   | 5.16   | 4.76   | 4.36   | 3.96   | 3.56   | 3.16   | 2.76   |
| <b>Estonia</b>                                          | 6.46   | 6.06   | 5.66   | 5.26   | 4.86   | 4.46   | 4.06   | 3.66   | 3.26   | 2.86   | 2.46   | 2.06   | 1.66   | 1.26   | 0.86   | 0.46   |
| <b>Lithuania</b>                                        | 6.46   | 6.06   | 5.66   | 5.26   | 4.86   | 4.46   | 4.06   | 3.66   | 3.26   | 2.86   | 2.46   | 2.06   | 1.66   | 1.26   | 0.86   | 0.46   |
| <b>Latvia</b>                                           | 6.46   | 6.06   | 5.66   | 5.26   | 4.86   | 4.46   | 4.06   | 3.66   | 3.26   | 2.86   | 2.46   | 2.06   | 1.66   | 1.26   | 0.86   | 0.46   |
| <b>Moldova</b>                                          | 12.21  | 12.21  | 12.21  | 12.21  | 12.21  | 12.21  | 12.21  | 12.21  | 12.21  | 12.21  | 12.21  | 12.21  | 12.21  | 12.21  | 12.21  | 12.21  |
| <b>Russia</b>                                           | 7.56   | 7.16   | 6.76   | 6.36   | 5.96   | 5.56   | 5.16   | 4.76   | 4.36   | 3.96   | 3.56   | 3.16   | 2.76   | 2.36   | 1.96   | 1.56   |
| <b>Russia (excl. Chechnya)</b>                          | 7.56   | 7.16   | 6.76   | 6.36   | 5.96   | 5.56   | 5.16   | 4.76   | 4.36   | 3.96   | 3.56   | 3.16   | 2.76   | 2.36   | 1.96   | 1.56   |
| <b>Ukraine</b>                                          | 8.56   | 8.16   | 7.76   | 7.36   | 6.96   | 6.56   | 6.16   | 5.76   | 5.36   | 4.96   | 4.56   | 4.16   | 3.76   | 3.36   | 2.96   | 2.56   |
| <b>Central Europe</b>                                   | 8.56   | 8.16   | 7.76   | 7.36   | 6.96   | 6.56   | 6.16   | 5.76   | 5.36   | 4.96   | 4.56   | 4.16   | 3.76   | 3.36   | 2.96   | 2.56   |
| <b>Albania</b>                                          | 7.56   | 7.16   | 6.76   | 6.36   | 5.96   | 5.56   | 5.16   | 4.76   | 4.36   | 3.96   | 3.56   | 3.16   | 2.76   | 2.36   | 1.96   | 1.56   |
| <b>Bosnia and Herzegovina</b>                           | 7.56   | 7.16   | 6.76   | 6.36   | 5.96   | 5.56   | 5.16   | 4.76   | 4.36   | 3.96   | 3.56   | 3.16   | 2.76   | 2.36   | 1.96   | 1.56   |
| <b>Bulgaria</b>                                         | 7.56   | 7.16   | 6.76   | 6.36   | 5.96   | 5.56   | 5.16   | 4.76   | 4.36   | 3.96   | 3.56   | 3.16   | 2.76   | 2.36   | 1.96   | 1.56   |
| <b>Bulgaria (excl. EU)</b>                              | 7.56   | 7.16   | 6.76   | 6.36   | 5.96   | 5.56   | 5.16   | 4.76   | 4.36   | 3.96   | 3.56   | 3.16   | 2.76   | 2.36   | 1.96   | 1.56   |
| <b>Czech Republic</b>                                   | 7.56   | 7.16   | 6.76   | 6.36   | 5.96   | 5.56   | 5.16   | 4.76   | 4.36   | 3.96   | 3.56   | 3.16   | 2.76   | 2.36   | 1.96   | 1.56   |
| <b>Hungary</b>                                          | 7.56   | 7.16   | 6.76   | 6.36   | 5.96   | 5.56   | 5.16   | 4.76   | 4.36   | 3.96   | 3.56   | 3.16   | 2.76   | 2.36   | 1.96   | 1.56   |
| <b>Maccedonia</b>                                       | 7.56   | 7.16   | 6.76   | 6.36   | 5.96   | 5.56   | 5.16   | 4.76   | 4.36   | 3.96   | 3.56   | 3.16   | 2.76   | 2.36   | 1.96   | 1.56   |
| <b>Poland</b>                                           | 7.56   | 7.16   | 6.76   | 6.36   | 5.96   | 5.56   | 5.16   | 4.76   | 4.36   | 3.96   | 3.56   | 3.16   | 2.76   | 2.36   | 1.96   | 1.56   |
| <b>Romania</b>                                          | 7.56   | 7.16   | 6.76   | 6.36   | 5.96   | 5.56   | 5.16   | 4.76   | 4.36   | 3.96   | 3.56   | 3.16   |        |        |        |        |

Appendix Table 17B. Stillbirth rates (per 1,000 live births) by location, 1980-1995

|                                        | 1980          | 1981          | 1982          | 1983          | 1984          | 1985          | 1986          | 1987          | 1988          | 1989          | 1990          | 1991          | 1992          | 1993          | 1994          | 1995          |
|----------------------------------------|---------------|---------------|---------------|---------------|---------------|---------------|---------------|---------------|---------------|---------------|---------------|---------------|---------------|---------------|---------------|---------------|
| Venezuela                              | 12.25         | 12.15         | 11.74         | 11.74         | 10.78         | 10.51         | 10.51         | 10.44         | 9.81          | 9.81          | 9.81          | 9.81          | 9.81          | 9.81          | 9.81          | 9.81          |
| Latin America                          | 11.34 (10.14) | 11.12 (10.13) | 10.78 (10.12) | 10.78 (10.12) | 10.17 (10.04) | 9.96 (10.09)  | 9.67 (10.14)  | 9.47 (10.12)  | 9.20 (10.06)  | 9.17 (10.06)  | 9.09 (10.05)  | 8.97 (10.07)  | 8.92 (10.07)  | 8.92 (10.07)  | 8.92 (10.07)  | 8.92 (10.07)  |
| Andean Latin America                   | 26.96 (26.09) | 26.96 (26.09) | 25.18 (24.33) | 24.24 (23.63) | 23.08 (23.51) | 22.76 (23.00) | 22.97 (23.24) | 23.15 (23.41) | 20.12 (20.84) | 20.12 (20.84) | 19.54 (20.29) | 19.54 (20.29) | 19.54 (20.29) | 19.54 (20.29) | 19.54 (20.29) | 19.54 (20.29) |
| Bolivia                                | 29.99         | 28.44         | 27.33         | 26.33         | 25.33         | 24.33         | 23.33         | 22.33         | 21.33         | 20.33         | 19.33         | 18.33         | 17.33         | 16.33         | 15.33         | 14.33         |
| Paraguay                               | 13.24 (12.46) | 13.13 (12.46) | 12.93 (12.46) | 12.93 (12.46) | 12.93 (12.46) | 12.93 (12.46) | 12.93 (12.46) | 12.93 (12.46) | 12.93 (12.46) | 12.93 (12.46) | 12.93 (12.46) | 12.93 (12.46) | 12.93 (12.46) | 12.93 (12.46) | 12.93 (12.46) | 12.93 (12.46) |
| Peru                                   | 20.51         | 18.47         | 18.54         | 17.37         | 16.36         | 15.35         | 14.34         | 13.33         | 12.32         | 11.31         | 10.30         | 9.29          | 8.28          | 7.27          | 6.26          | 5.25          |
| Equador                                | 10.64 (9.99)  | 10.58 (9.84)  | 10.52 (9.35)  | 10.46 (9.18)  | 10.40 (8.91)  | 10.34 (8.42)  | 10.28 (7.94)  | 10.22 (7.60)  | 10.16 (7.36)  | 10.10 (7.12)  | 10.04 (6.94)  | 9.98 (6.76)   | 9.92 (6.58)   | 9.86 (6.40)   | 9.80 (6.22)   | 9.74 (6.04)   |
| Finland                                | 28.14 (28.48) | 27.14 (27.65) | 26.14 (27.16) | 25.14 (27.67) | 24.14 (28.18) | 23.14 (28.69) | 22.14 (29.20) | 21.14 (29.71) | 20.14 (30.22) | 19.14 (30.73) | 18.14 (31.24) | 17.14 (31.75) | 16.14 (32.26) | 15.14 (32.77) | 14.14 (33.28) | 13.14 (33.79) |
| Caribbean                              | 26.13 (26.13) | 25.13 (26.13) | 24.13 (26.13) | 23.13 (26.13) | 22.13 (26.13) | 21.13 (26.13) | 20.13 (26.13) | 19.13 (26.13) | 18.13 (26.13) | 17.13 (26.13) | 16.13 (26.13) | 15.13 (26.13) | 14.13 (26.13) | 13.13 (26.13) | 12.13 (26.13) | 11.13 (26.13) |
| Antigua and Barbuda                    | 0.69 (1.86)   | 0.69 (1.86)   | 0.69 (1.86)   | 0.69 (1.86)   | 0.69 (1.86)   | 0.69 (1.86)   | 0.69 (1.86)   | 0.69 (1.86)   | 0.69 (1.86)   | 0.69 (1.86)   | 0.69 (1.86)   | 0.69 (1.86)   | 0.69 (1.86)   | 0.69 (1.86)   | 0.69 (1.86)   | 0.69 (1.86)   |
| The Bahamas                            | 17.26         | 16.74         | 16.10         | 15.47         | 14.83         | 14.20         | 13.56         | 12.93         | 12.30         | 11.67         | 11.04         | 10.41         | 9.78          | 9.15          | 8.52          | 7.89          |
| Barbados                               | 12.79         | 12.32         | 11.91         | 11.50         | 11.09         | 10.68         | 10.27         | 9.86          | 9.45          | 9.04          | 8.63          | 8.22          | 7.81          | 7.40          | 7.00          | 6.59          |
| Belize                                 | 10.25 (9.69)  | 9.79 (9.15)   | 9.32 (8.50)   | 8.85 (7.64)   | 8.38 (6.43)   | 7.91 (4.86)   | 7.44 (2.79)   | 6.97 (1.52)   | 6.50 (0.27)   | 6.03 (0.00)   | 5.56 (0.27)   | 5.09 (0.54)   | 4.62 (0.81)   | 4.15 (1.08)   | 3.68 (1.45)   | 3.21 (1.82)   |
| Indonesia                              | 15.28 (21.23) | 14.72 (22.72) | 14.16 (23.71) | 13.60 (24.70) | 13.04 (25.69) | 12.48 (26.68) | 11.92 (27.67) | 11.36 (28.66) | 10.80 (29.65) | 10.24 (30.64) | 9.68 (31.63)  | 9.12 (32.62)  | 8.56 (33.61)  | 8.00 (34.60)  | 7.44 (35.59)  | 6.88 (36.58)  |
| Malaysia                               | 11.56 (9.13)  | 10.73 (9.13)  | 10.13 (9.26)  | 9.72 (9.58)   | 9.31 (9.41)   | 8.90 (9.44)   | 8.49 (9.47)   | 8.08 (9.50)   | 7.67 (9.53)   | 7.26 (9.56)   | 6.85 (9.59)   | 6.44 (9.62)   | 6.03 (9.65)   | 5.62 (9.68)   | 5.21 (9.71)   | 4.80 (9.74)   |
| Cuba                                   | 8.51          | 8.00          | 7.49          | 6.98          | 6.47          | 5.96          | 5.45          | 4.94          | 4.43          | 3.92          | 3.41          | 2.90          | 2.39          | 1.88          | 1.37          | 0.86          |
| Dominica                               | 17.22 (1.06)  | 16.91 (0.69)  | 16.60 (0.38)  | 16.29 (0.07)  | 15.98 (0.24)  | 15.67 (0.51)  | 15.36 (0.78)  | 15.05 (1.05)  | 14.74 (1.32)  | 14.43 (1.59)  | 14.12 (1.86)  | 13.81 (2.13)  | 13.50 (2.40)  | 13.19 (2.67)  | 12.88 (2.94)  | 12.57 (3.21)  |
| Dominican Republic                     | 22.24 (20.78) | 21.44 (20.78) | 20.64 (20.78) | 19.84 (20.78) | 19.04 (20.78) | 18.24 (20.78) | 17.44 (20.78) | 16.64 (20.78) | 15.84 (20.78) | 15.04 (20.78) | 14.24 (20.78) | 13.44 (20.78) | 12.64 (20.78) | 11.84 (20.78) | 11.04 (20.78) | 10.24 (20.78) |
| Grenada                                | 12.24 (12.48) | 11.44 (11.97) | 10.64 (11.50) | 9.84 (11.03)  | 9.04 (10.56)  | 8.24 (10.09)  | 7.44 (9.62)   | 6.64 (8.75)   | 5.84 (7.88)   | 5.04 (7.01)   | 4.24 (6.14)   | 3.44 (5.27)   | 2.64 (4.40)   | 1.84 (3.53)   | 1.04 (2.66)   | 0.24 (1.79)   |
| Guyana                                 | 23.41 (21.73) | 22.76 (20.78) | 22.10 (20.78) | 21.44 (20.78) | 20.78 (20.78) | 20.12 (20.78) | 19.46 (20.78) | 18.80 (20.78) | 18.14 (20.78) | 17.48 (20.78) | 16.82 (20.78) | 16.16 (20.78) | 15.50 (20.78) | 14.84 (20.78) | 14.18 (20.78) | 13.52 (20.78) |
| Haiti                                  | 47.47 (37.02) | 45.18 (36.81) | 42.89 (28.61) | 40.60 (20.41) | 38.31 (12.21) | 36.02 (4.01)  | 33.73 (0.00)  | 31.44 (0.00)  | 29.15 (0.00)  | 26.86 (0.00)  | 24.57 (0.00)  | 22.28 (0.00)  | 20.00 (0.00)  | 17.71 (0.00)  | 15.42 (0.00)  | 13.13 (0.00)  |
| Guatemala                              | 19.91         | 18.94         | 18.11         | 17.28         | 16.45         | 15.62         | 14.79         | 13.96         | 13.13         | 12.30         | 11.47         | 10.64         | 9.81          | 8.98          | 8.15          | 7.32          |
| Guinea                                 | 11.62 (9.32)  | 11.62 (9.32)  | 11.62 (9.32)  | 11.62 (9.32)  | 11.62 (9.32)  | 11.62 (9.32)  | 11.62 (9.32)  | 11.62 (9.32)  | 11.62 (9.32)  | 11.62 (9.32)  | 11.62 (9.32)  | 11.62 (9.32)  | 11.62 (9.32)  | 11.62 (9.32)  | 11.62 (9.32)  | 11.62 (9.32)  |
| Jamaica                                | 16.10 (14.36) | 16.10 (14.36) | 16.10 (14.36) | 16.10 (14.36) | 16.10 (14.36) | 16.10 (14.36) | 16.10 (14.36) | 16.10 (14.36) | 16.10 (14.36) | 16.10 (14.36) | 16.10 (14.36) | 16.10 (14.36) | 16.10 (14.36) | 16.10 (14.36) | 16.10 (14.36) | 16.10 (14.36) |
| Puerto Rico                            | 13.26         | 13.02         | 12.69         | 12.35         | 12.01         | 11.67         | 11.33         | 10.99         | 10.65         | 10.31         | 9.97          | 9.63          | 9.29          | 8.95          | 8.61          | 8.27          |
| Saint Lucia                            | 11.34 (10.85) | 11.34 (10.85) | 11.34 (10.85) | 11.34 (10.85) | 11.34 (10.85) | 11.34 (10.85) | 11.34 (10.85) | 11.34 (10.85) | 11.34 (10.85) | 11.34 (10.85) | 11.34 (10.85) | 11.34 (10.85) | 11.34 (10.85) | 11.34 (10.85) | 11.34 (10.85) | 11.34 (10.85) |
| Saint Vincent and the Grenadines       | 6.10 (16.67)  | 6.10 (16.67)  | 6.10 (16.67)  | 6.10 (16.67)  | 6.10 (16.67)  | 6.10 (16.67)  | 6.10 (16.67)  | 6.10 (16.67)  | 6.10 (16.67)  | 6.10 (16.67)  | 6.10 (16.67)  | 6.10 (16.67)  | 6.10 (16.67)  | 6.10 (16.67)  | 6.10 (16.67)  | 6.10 (16.67)  |
| Suriname                               | 19.25 (14.76) | 19.25 (14.76) | 19.25 (14.76) | 19.25 (14.76) | 19.25 (14.76) | 19.25 (14.76) | 19.25 (14.76) | 19.25 (14.76) | 19.25 (14.76) | 19.25 (14.76) | 19.25 (14.76) | 19.25 (14.76) | 19.25 (14.76) | 19.25 (14.76) | 19.25 (14.76) | 19.25 (14.76) |
| Trinidad and Tobago                    | 15.79         | 15.25         | 14.71         | 14.17         | 13.63         | 13.09         | 12.55         | 12.01         | 11.47         | 10.93         | 10.39         | 9.85          | 9.31          | 8.77          | 8.23          | 7.69          |
| Virgin Islands, U.S.                   | 0.29 (0.11)   | 0.29 (0.11)   | 0.29 (0.11)   | 0.29 (0.11)   | 0.29 (0.11)   | 0.29 (0.11)   | 0.29 (0.11)   | 0.29 (0.11)   | 0.29 (0.11)   | 0.29 (0.11)   | 0.29 (0.11)   | 0.29 (0.11)   | 0.29 (0.11)   | 0.29 (0.11)   | 0.29 (0.11)   | 0.29 (0.11)   |
| Tropical Latin America                 | 17.79 (20.96) | 17.79 (20.96) | 17.79 (20.96) | 17.79 (20.96) | 17.79 (20.96) | 17.79 (20.96) | 17.79 (20.96) | 17.79 (20.96) | 17.79 (20.96) | 17.79 (20.96) | 17.79 (20.96) | 17.79 (20.96) | 17.79 (20.96) | 17.79 (20.96) | 17.79 (20.96) | 17.79 (20.96) |
| Brazil                                 | 17.92 (26.11) | 17.92 (26.11) | 17.92 (26.11) | 17.92 (26.11) | 17.92 (26.11) | 17.92 (26.11) | 17.92 (26.11) | 17.92 (26.11) | 17.92 (26.11) | 17.92 (26.11) | 17.92 (26.11) | 17.92 (26.11) | 17.92 (26.11) | 17.92 (26.11) | 17.92 (26.11) | 17.92 (26.11) |
| Panama                                 | 13.12 (13.86) | 12.69 (12.27) | 12.27 (11.84) | 11.84 (11.41) | 11.41 (10.98) | 10.98 (10.55) | 10.55 (10.12) | 10.12 (9.69)  | 9.69 (9.26)   | 9.26 (8.83)   | 8.83 (8.40)   | 8.40 (7.97)   | 7.97 (7.54)   | 7.54 (7.11)   | 7.11 (6.68)   | 6.68 (6.25)   |
| Southeast Asia, East Asia, and Oceania | 21.24         | 20.56         | 19.91         | 19.25         | 18.60         | 17.94         | 17.28         | 16.62         | 15.96         | 15.30         | 14.64         | 13.98         | 13.32         | 12.66         | 12.00         | 11.34         |
| East Asia                              | 18.82         | 18.21         | 17.60         | 16.99         | 16.38         | 15.77         | 15.16         | 14.55         | 13.94         | 13.33         | 12.72         | 12.11         | 11.50         | 10.89         | 10.28         | 9.67          |
| China                                  | 11.89 (23.23) | 11.89 (23.23) | 11.89 (23.23) | 11.89 (23.23) | 11.89 (23.23) | 11.89 (23.23) | 11.89 (23.23) | 11.89 (23.23) | 11.89 (23.23) | 11.89 (23.23) | 11.89 (23.23) | 11.89 (23.23) | 11.89 (23.23) | 11.89 (23.23) | 11.89 (23.23) | 11.89 (23.23) |
| North Korea                            | 0.97 (0.12)   | 0.97 (0.12)   | 0.97 (0.12)   | 0.97 (0.12)   | 0.97 (0.12)   | 0.97 (0.12)   | 0.97 (0.12)   | 0.97 (0.12)   | 0.97 (0.12)   | 0.97 (0.12)   | 0.97 (0.12)   | 0.97 (0.12)   | 0.97 (0.12)   | 0.97 (0.12)   | 0.97 (0.12)   | 0.97 (0.12)   |
| Taiwan (Province of China)             | 0.91 (0.51)   | 0.87 (0.91)   | 0.82 (0.95)   | 0.77 (0.98)   | 0.72 (1.00)   | 0.67 (1.02)   | 0.62 (1.04)   | 0.57 (1.06)   | 0.52 (1.08)   | 0.47 (1.10)   | 0.42 (1.12)   | 0.37 (1.14)   | 0.32 (1.16)   | 0.27 (1.18)   | 0.22 (1.20)   | 0.17 (1.22)   |
| Southeast Asia                         | 23.24 (20.76) | 22.76 (20.76) | 22.28 (20.76) | 21.80 (20.76) | 21.32 (20.76) | 20.84 (20.76) | 20.36 (20.76) | 19.88 (20.76) | 19.40 (20.76) | 18.92 (20.76) | 18.44 (20.76) | 17.96 (20.76) | 17.48 (20.76) | 17.00 (20.76) | 16.52 (20.76) | 16.04 (20.76) |
| Cambodia                               | 41.87         | 40.74         | 39.64         | 38.54         | 37.44         | 36.34         | 35.24         | 34.14         | 33.04         | 31.94         | 30.84         | 29.74         | 28.64         | 27.54         | 26.44         | 25.34         |
| Indonesia                              | 10.99 (10.99) | 10.99 (10.99) | 10.99 (10.99) | 10.99 (10.99) | 10.99 (10.99) | 10.99 (10.99) | 10.99 (10.99) | 10.99 (10.99) | 10.99 (10.99) | 10.99 (10.99) | 10.99 (10.99) | 10.99 (10.99) | 10.99 (10.99) | 10.99 (10.99) | 10.99 (10.99) | 10.99 (10.99) |
| Laos                                   | 19.25 (14.76) | 19.25 (14.76) | 19.25 (14.76) | 19.25 (14.76) | 19.25 (14.76) | 19.25 (14.76) | 19.25 (14.76) | 19.25 (14.76) | 19.25 (14.76) | 19.25 (14.76) | 19.25 (14.76) | 19.25 (14.76) | 19.25 (14.76) | 19.25 (14.76) | 19.25 (14.76) | 19.25 (14.76) |
| Maldives                               | 89.17         | 84.33         | 79.49         | 74.65         | 69.81         | 64.97         | 60.13         | 55.29         | 50.45         | 45.61         | 40.77         | 35.93         | 31.09         | 26.25         | 21.41         | 16.57         |
| Mauritius                              | 19.01 (23.56) | 19.01 (23.56) | 19.01 (23.56) | 19.01 (23.56) | 19.01 (23.56) | 19.01 (23.56) | 19.01 (23.56) | 19.01 (23.56) | 19.01 (23.56) | 19.01 (23.56) | 19.01 (23.56) | 19.01 (23.56) | 19.01 (23.56) | 19.01 (23.56) | 19.01 (23.56) | 19.01 (23.56) |
| Myanmar                                | 27.65 (28.44) | 27.65 (28.44) | 27.65 (28.44) | 27.65 (28.44) | 27.65 (28.44) | 27.65 (28.44) | 27.65 (28.44) | 27.65 (28.44) | 27.65 (28.44) | 27.65 (28.44) | 27.65 (28.44) | 27.65 (28.44) | 27.65 (28.44) | 27.65 (28.44) | 27.65 (28.44) | 27.65 (28.44) |
| Philippines                            | 15.25 (16.79) | 14.44 (16.79) | 13.63 (16.79) | 12.82 (16.79) | 12.01 (16.79) | 11.20 (16.79) | 10.39 (16.79) | 9.58 (16.79)  | 8.77 (16.79)  | 7.96 (16.79)  | 7.15 (16.79)  | 6.34 (16.79)  | 5.53 (16.79)  | 4.72 (16.79)  | 3.91 (16.79)  | 3.10 (16.79)  |
| Sri Lanka                              | 11.42 (11.42) | 11.42 (11.42) | 11.42 (11.42) | 11.42 (11.42) | 11.42 (11.42) | 11.42 (11.42) | 11.42 (11.42) | 11.42 (11.42) | 11.42 (11.42) | 11.42 (11.42) | 11.42 (11.42) | 11.42 (11.42) | 11.42 (11.42) | 11.42 (11.42) | 11.42 (11.42) | 11.42 (11.42) |
| Seychelles                             | 13.38 (16.03) | 12.88 (16.03) | 12.38 (16.03) | 11.88 (16.03) | 11.38 (16.03) | 10.88 (16.03) | 10.38 (16.03) | 9.88 (16.03)  | 9.38 (16.03)  | 8.88 (16.03)  | 8.38 (16.03)  | 7.88 (16.03)  | 7.38 (16.03   |               |               |               |

Appendix Table 17B. Stillbirth rates (per 1,000 live births) by location, 1980-1995

|                                  | 1980             | 1981             | 1982             | 1983             | 1984             | 1985             | 1986             | 1987             | 1988             | 1989             | 1990             | 1991             | 1992             | 1993             | 1994             | 1995             |
|----------------------------------|------------------|------------------|------------------|------------------|------------------|------------------|------------------|------------------|------------------|------------------|------------------|------------------|------------------|------------------|------------------|------------------|
| Namibia                          | 24.65            | 24.14            | 23.55            | 22.54            | 22.02            | 21.92            | 20.91            | 19.71            | 19.15            | 18.43            | 17.56            | 16.61            | 15.71            | 14.97            | 14.97            | 14.97            |
| South Africa                     | (19.92 to 29.54) | (19.6 to 29.15)  | (19.05 to 28.37) | (18.41 to 27.41) | (17.84 to 26.66) | (17.19 to 25.73) | (16.74 to 24.99) | (16.42 to 24.24) | (16.13 to 23.94) | (15.81 to 23.21) | (15.11 to 22.21) | (14.37 to 21.15) | (13.71 to 20.01) | (13.12 to 18.95) | (12.46 to 17.97) | (11.81 to 17.17) |
| Swaziland                        | (21.5 to 26.58)  | (20.84 to 25.83) | (20.25 to 25.24) | (19.83 to 24.17) | (19.37 to 24.21) | (18.86 to 23.54) | (18.32 to 23.02) | (17.63 to 22.02) | (16.93 to 21.11) | (16.2 to 20.15)  | (15.6 to 19.3)   | (14.96 to 18.42) | (14.45 to 17.75) | (14.14 to 17.1)  | (13.6 to 16.41)  | (13.28 to 15.94) |
| Zimbabwe                         | 26.65            | 26.06            | 25.41            | 24.65            | 24.17            | 23.27            | 22.41            | 21.08            | 20.42            | 19.78            | 19.07            | 18.31            | 17.51            | 16.66            | 16.66            | 16.66            |
| Western Sub-Saharan Africa       | (22.86 to 41.63) | (21.85 to 38.30) | (21.14 to 36.09) | (20.44 to 34.19) | (20.2 to 33.38)  | (19.67 to 32.56) | (19.09 to 31.76) | (18.71 to 30.99) | (18.3 to 30.44)  | (18.0 to 29.93)  | (17.5 to 29.31)  | (17.2 to 28.51)  | (17.2 to 28.51)  | (17.2 to 28.51)  | (17.2 to 28.51)  | (17.2 to 28.51)  |
| Benin                            | 37.72            | 36.68            | 35.81            | 34.87            | 34.37            | 33.57            | 32.79            | 31.92            | 31.06            | 30.21            | 29.37            | 28.54            | 27.71            | 26.88            | 26.05            | 25.21            |
| Burkina Faso                     | (34.76 to 40.9)  | (33.84 to 39.71) | (33.14 to 38.82) | (32.49 to 38.03) | (31.9 to 37.27)  | (31.0 to 36.36)  | (30.15 to 35.56) | (29.74 to 34.86) | (29.18 to 34.22) | (28.4 to 33.11)  | (28.0 to 32.27)  | (27.0 to 31.57)  | (26.5 to 30.94)  | (25.5 to 30.16)  | (24.5 to 29.16)  | (23.5 to 28.76)  |
| Cameroun                         | (30.67 to 36.63) | (29.74 to 35.73) | (28.8 to 34.72)  | (28.25 to 34.07) | (27.68 to 33.35) | (26.9 to 32.21)  | (26.06 to 31.35) | (25.41 to 30.61) | (24.75 to 29.78) | (24.0 to 28.78)  | (23.7 to 28.3)   | (22.6 to 27.7)   | (22.2 to 26.54)  | (21.8 to 26.1)   | (21.4 to 25.67)  | (20.8 to 25.26)  |
| Cape Verde                       | 11.6             | 11.07            | 10.57            | 10.13            | 9.72             | 9.32             | 8.93             | 8.54             | 8.15             | 7.76             | 7.37             | 6.98             | 6.59             | 6.2              | 5.81             | 5.42             |
| Chad                             | (55.94 to 59.77) | (55.7 to 59.61)  | (55.51 to 59.21) | (54.72 to 58.48) | (53.8 to 57.56)  | (52.62 to 56.1)  | (51.51 to 55.1)  | (50.48 to 54.25) | (49.21 to 52.57) | (48.1 to 51.31)  | (47.1 to 50.18)  | (46.15 to 49.13) | (45.31 to 48.21) | (44.77 to 47.62) | (44.23 to 47.06) | (43.83 to 46.66) |
| Cote d'Ivoire                    | (35.4 to 38.74)  | (34.8 to 38.1)   | (34.2 to 37.36)  | (33.89 to 36.47) | (33.19 to 35.17) | (32.1 to 34.98)  | (31.89 to 34.61) | (31.6 to 34.34)  | (31.2 to 33.84)  | (31.0 to 33.49)  | (30.6 to 32.94)  | (30.3 to 32.51)  | (30.1 to 32.18)  | (29.9 to 31.8)   | (29.7 to 31.5)   | (29.5 to 31.3)   |
| The Gambia                       | (46.7 to 49.81)  | (45.6 to 48.69)  | (44.3 to 47.27)  | (43.15 to 46.06) | (42.34 to 45.24) | (41.71 to 44.56) | (41.12 to 43.92) | (40.51 to 43.23) | (39.83 to 42.5)  | (39.34 to 41.86) | (38.7 to 41.24)  | (38.2 to 40.59)  | (37.68 to 40.3)  | (37.08 to 39.4)  | (36.48 to 38.78) | (35.83 to 38.09) |
| Ghana                            | 30.7             | 29.78            | 28.8             | 27.8             | 26.8             | 25.8             | 24.8             | 23.8             | 22.8             | 21.8             | 20.8             | 19.8             | 18.8             | 17.8             | 16.8             | 15.8             |
| Guinea                           | 42.9             | 42.29            | 41.67            | 40.9             | 40.16            | 39.38            | 38.59            | 37.82            | 37.06            | 36.31            | 35.56            | 34.81            | 34.06            | 33.31            | 32.56            | 31.81            |
| Guinea-Bissau                    | (41.3 to 44.43)  | (40.2 to 43.3)   | (39.1 to 42.17)  | (38.0 to 41.13)  | (36.9 to 40.17)  | (35.8 to 39.12)  | (34.7 to 38.05)  | (33.6 to 37.0)   | (32.5 to 35.94)  | (31.4 to 34.88)  | (30.3 to 33.82)  | (29.2 to 32.76)  | (28.1 to 31.7)   | (27.0 to 30.64)  | (25.9 to 29.58)  | (24.8 to 28.46)  |
| Liberia                          | (52.1 to 60.26)  | (52.1 to 60.03)  | (51.7 to 59.7)   | (51.2 to 59.57)  | (50.67 to 58.18) | (50.21 to 57.64) | (49.74 to 56.54) | (49.2 to 55.51)  | (48.7 to 54.56)  | (48.1 to 54.27)  | (47.5 to 53.93)  | (46.9 to 53.47)  | (46.3 to 52.91)  | (45.7 to 52.35)  | (45.1 to 51.78)  | (44.5 to 51.31)  |
| Mali                             | (51.2 to 58.51)  | (50.1 to 57.53)  | (49.0 to 56.24)  | (47.83 to 54.91) | (46.7 to 53.69)  | (45.6 to 52.43)  | (44.3 to 50.92)  | (43.1 to 49.41)  | (41.9 to 47.58)  | (40.9 to 45.96)  | (39.8 to 44.57)  | (38.8 to 43.17)  | (37.7 to 41.89)  | (36.7 to 40.72)  | (35.7 to 39.41)  | (34.7 to 38.09)  |
| Mali                             | (58.0 to 57.50)  | (57.7 to 56.61)  | (56.7 to 56.01)  | (55.7 to 55.01)  | (54.6 to 53.81)  | (53.4 to 52.61)  | (52.1 to 51.31)  | (50.8 to 50.01)  | (49.5 to 48.71)  | (48.2 to 47.41)  | (46.9 to 46.11)  | (45.6 to 44.81)  | (44.3 to 43.51)  | (43.0 to 42.21)  | (41.7 to 40.91)  | (40.4 to 39.61)  |
| Mauritania                       | 34.6             | 33.41            | 32.38            | 31.33            | 30.28            | 29.23            | 28.18            | 27.13            | 26.08            | 25.03            | 23.98            | 22.93            | 21.88            | 20.83            | 19.78            | 18.73            |
| Niger                            | 50.4             | 49.87            | 49.38            | 48.87            | 48.37            | 47.87            | 47.37            | 46.87            | 46.37            | 45.87            | 45.37            | 44.87            | 44.37            | 43.87            | 43.37            | 42.87            |
| Nigeria                          | (48.7 to 50.19)  | (48.2 to 50.63)  | (47.7 to 51.01)  | (47.2 to 50.38)  | (46.7 to 50.05)  | (46.2 to 49.32)  | (45.7 to 48.39)  | (45.2 to 47.45)  | (44.7 to 46.52)  | (44.2 to 45.72)  | (43.7 to 45.02)  | (43.2 to 44.32)  | (42.7 to 43.72)  | (42.2 to 43.12)  | (41.7 to 42.52)  | (41.2 to 42.02)  |
| Nigeria                          | (45.5 to 59.98)  | (45.1 to 59.26)  | (44.6 to 58.72)  | (44.2 to 58.14)  | (43.6 to 57.6)   | (43.1 to 57.02)  | (42.5 to 56.44)  | (41.9 to 55.86)  | (41.3 to 55.28)  | (40.7 to 54.7)   | (40.1 to 54.12)  | (39.5 to 53.54)  | (38.9 to 52.96)  | (38.3 to 52.38)  | (37.7 to 51.8)   | (37.1 to 51.22)  |
| South Sudan and Prince of        | (16.4 to 18.75)  | (16.1 to 18.17)  | (15.9 to 18.17)  | (15.7 to 18.49)  | (15.6 to 18.28)  | (15.4 to 18.02)  | (15.1 to 17.76)  | (14.8 to 17.49)  | (14.5 to 17.22)  | (14.2 to 16.95)  | (13.9 to 16.68)  | (13.6 to 16.41)  | (13.3 to 16.14)  | (13.0 to 15.87)  | (12.7 to 15.6)   | (12.4 to 15.33)  |
| Senegal                          | (22.8 to 34.52)  | (21.54 to 34.21) | (21.54 to 33.72) | (21.19 to 33.23) | (20.92 to 32.98) | (20.7 to 32.56)  | (20.36 to 32.11) | (20.0 to 31.9)   | (19.6 to 31.52)  | (19.2 to 31.14)  | (18.8 to 30.76)  | (18.4 to 30.38)  | (18.0 to 29.99)  | (17.6 to 29.61)  | (17.2 to 29.23)  | (16.8 to 28.85)  |
| Sierra Leone                     | 58.4             | 56.1             | 53.8             | 51.2             | 48.7             | 46.2             | 43.7             | 41.2             | 38.7             | 36.2             | 33.7             | 31.2             | 28.7             | 26.2             | 23.7             | 21.2             |
| Togo                             | 41.49            | 40.66            | 39.53            | 38.4             | 37.2             | 36.0             | 34.8             | 33.6             | 32.4             | 31.2             | 30.0             | 28.8             | 27.6             | 26.4             | 25.2             | 24.0             |
| Eastern Sub-Saharan Africa       | (39.2 to 45.71)  | (38.4 to 45.23)  | (37.7 to 44.75)  | (37.1 to 44.17)  | (36.5 to 43.59)  | (35.9 to 42.99)  | (35.3 to 42.39)  | (34.7 to 41.79)  | (34.1 to 41.19)  | (33.5 to 40.59)  | (32.9 to 39.99)  | (32.3 to 39.39)  | (31.7 to 38.79)  | (31.1 to 38.19)  | (30.5 to 37.59)  | (29.9 to 37.0)   |
| Burundi                          | (40.9 to 45.9)   | (40.0 to 45.92)  | (39.5 to 44.29)  | (39.0 to 44.1)   | (38.4 to 43.81)  | (37.8 to 43.41)  | (37.2 to 42.91)  | (36.6 to 42.41)  | (36.0 to 41.91)  | (35.4 to 41.41)  | (34.8 to 40.91)  | (34.2 to 40.41)  | (33.6 to 39.91)  | (33.0 to 39.41)  | (32.4 to 38.91)  | (31.8 to 38.41)  |
| Comoros                          | (32.9 to 33.09)  | (31.2 to 32.21)  | (29.7 to 31.44)  | (28.1 to 30.46)  | (26.5 to 29.49)  | (25.0 to 28.96)  | (23.5 to 27.82)  | (22.0 to 26.08)  | (20.5 to 24.94)  | (19.0 to 23.8)   | (17.5 to 22.65)  | (16.0 to 21.8)   | (14.5 to 21.0)   | (13.0 to 20.5)   | (11.5 to 19.0)   | (10.0 to 17.5)   |
| Djibouti                         | (39.19 to 40.8)  | (39.1 to 40.75)  | (38.9 to 40.58)  | (39.07 to 40.7)  | (38.9 to 40.53)  | (38.6 to 40.23)  | (38.3 to 39.93)  | (38.0 to 39.6)   | (37.7 to 39.3)   | (37.4 to 39.0)   | (37.1 to 38.7)   | (36.8 to 38.4)   | (36.5 to 38.1)   | (36.2 to 37.8)   | (35.9 to 37.5)   | (35.6 to 37.2)   |
| Eritrea                          | 38.46            | 37.36            | 36.8             | 36.16            | 35.48            | 34.8             | 34.2             | 33.48            | 32.76            | 32.04            | 31.32            | 30.6             | 29.88            | 29.16            | 28.44            | 27.72            |
| Ethiopia                         | (36.2 to 40.71)  | (35.8 to 40.17)  | (35.1 to 39.53)  | (34.5 to 38.95)  | (33.9 to 38.37)  | (33.3 to 37.79)  | (32.7 to 37.21)  | (32.1 to 36.63)  | (31.5 to 36.05)  | (30.9 to 35.47)  | (30.3 to 34.99)  | (29.7 to 34.61)  | (29.1 to 34.23)  | (28.5 to 33.85)  | (27.9 to 33.47)  | (27.3 to 33.09)  |
| Kenya                            | (34.8 to 38.6)   | (33.84 to 38.1)  | (33.2 to 37.58)  | (32.9 to 37.12)  | (32.5 to 36.77)  | (32.1 to 36.38)  | (31.6 to 35.91)  | (31.1 to 35.44)  | (30.6 to 34.97)  | (30.1 to 34.3)   | (29.6 to 33.76)  | (29.1 to 33.29)  | (28.6 to 32.82)  | (28.1 to 32.35)  | (27.6 to 31.88)  | (27.1 to 31.41)  |
| Madagascar                       | (43.6 to 38.87)  | (43.05 to 39.35) | (42.41 to 39.82) | (41.6 to 40.12)  | (40.7 to 41.1)   | (39.8 to 41.1)   | (38.9 to 41.1)   | (38.0 to 41.1)   | (37.1 to 41.1)   | (36.2 to 41.1)   | (35.3 to 41.1)   | (34.4 to 41.1)   | (33.5 to 41.1)   | (32.6 to 41.1)   | (31.7 to 41.1)   | (30.8 to 41.1)   |
| Malawi                           | (44.5 to 46.76)  | (44.1 to 45.51)  | (43.7 to 44.89)  | (43.1 to 45.34)  | (42.5 to 44.57)  | (41.9 to 44.51)  | (41.3 to 44.05)  | (40.7 to 43.71)  | (40.1 to 43.65)  | (39.5 to 43.59)  | (38.9 to 43.53)  | (38.3 to 43.47)  | (37.7 to 43.41)  | (37.1 to 43.35)  | (36.5 to 43.29)  | (35.9 to 43.23)  |
| Mozambique                       | 55.76            | 55.21            | 54.81            | 54.71            | 54.56            | 54.49            | 54.27            | 54.1             | 53.96            | 53.8             | 53.65            | 53.5             | 53.35            | 53.2             | 53.05            | 52.9             |
| Rwanda                           | (36.4 to 44.19)  | (36.1 to 44.1)   | (35.8 to 44.1)   | (35.5 to 44.1)   | (35.2 to 44.1)   | (34.9 to 44.1)   | (34.6 to 44.1)   | (34.3 to 44.1)   | (34.0 to 44.1)   | (33.7 to 44.1)   | (33.4 to 44.1)   | (33.1 to 44.1)   | (32.8 to 44.1)   | (32.5 to 44.1)   | (32.2 to 44.1)   | (31.9 to 44.1)   |
| Somalia                          | (41.94 to 47.13) | (41.82 to 47.1)  | (41.7 to 47.06)  | (41.5 to 47.06)  | (41.3 to 47.06)  | (41.1 to 47.06)  | (40.9 to 47.06)  | (40.7 to 47.06)  | (40.5 to 47.06)  | (40.3 to 47.06)  | (40.1 to 47.06)  | (39.9 to 47.06)  | (39.7 to 47.06)  | (39.5 to 47.06)  | (39.3 to 47.06)  | (39.1 to 47.06)  |
| South Sudan                      | 65.64            | 65.62            | 64.63            | 63.76            | 62.9             | 62.03            | 61.16            | 60.29            | 59.42            | 58.55            | 57.68            | 56.81            | 55.94            | 55.07            | 54.2             | 53.33            |
| Tanzania                         | 35.48            | 35.17            | 34.85            | 34.46            | 33.97            | 33.52            | 32.96            | 32.3             | 31.56            | 30.73            | 29.89            | 29.06            | 28.22            | 27.38            | 26.54            | 25.7             |
| Uganda                           | (31.2 to 35.14)  | (30.8 to 34.88)  | (30.1 to 34.76)  | (29.3 to 34.4)   | (28.5 to 33.9)   | (27.7 to 33.2)   | (26.9 to 32.6)   | (26.1 to 32.1)   | (25.3 to 31.6)   | (24.5 to 31.1)   | (23.7 to 30.6)   | (22.9 to 29.5)   | (22.1 to 28.1)   | (21.3 to 27.1)   | (20.5 to 26.9)   | (19.7 to 26.3)   |
| Zambia                           | 47.26            | 46.28            | 45.31            | 44.34            | 43.37            | 42.4             | 41.43            | 40.46            | 39.49            | 38.52            | 37.55            | 36.58            | 35.61            | 34.64            | 33.67            | 32.7             |
| Central Sub-Saharan Africa       | (45.26 to 48.83) | (45.26 to 47.83) | (44.5 to 47.13)  | (43.8 to 44.73)  | (43.1 to 44.07)  | (42.4 to 44.11)  | (41.7 to 44.17)  | (41.0 to 44.64)  | (40.3 to 44.11)  | (39.6 to 43.88)  | (38.9 to 43.65)  | (38.2 to 43.42)  | (37.5 to 43.19)  | (36.8 to 42.96)  | (36.1 to 42.73)  | (35.4 to 42.5)   |
| Angola                           | 51.35 to 56.25   | 51.1 to 56.01    | 50.9 to 55.88    | 50.5 to 55.83    | 49.7 to 54.56    | 48.9 to 53.58    | 48.1 to 53.59    | 47.3 to 53.6     | 46.5 to 53.61    | 45.7 to 53.62    | 44.9 to 53.63    | 44.1 to 53.64    | 43.3 to 53.65    | 42.5 to 53.66    | 41.7 to 53.67    | 40.9 to 53.68    |
| Central African Republic         | (54.9 to 62.38)  | (54.1 to 61.57)  | (53.2 to 61.1)   | (52.3 to 61.03)  | (51.4 to 60.83)  | (50.5 to 60.63)  | (49.6 to 60.43)  | (48.7 to 60.23)  | (47.8 to 60.03)  | (46.9 to 59.83)  | (46.0 to 59.63)  | (45.1 to 59.43)  | (44.2 to 59.23)  | (43.3 to 59.03)  | (42.4 to 58.83)  | (41.5 to 58.63)  |
| Congo                            | 33.7             | 32.49            | 31.45            | 30.3             | 29.23            | 28.13            | 27.04            | 25.94            | 24.84            | 23.74            | 22.64            | 21.54            | 20.44            | 19.34            | 18.24            | 17.14            |
| Democratic Republic of the Congo | (41.2 to 46.29)  | (41.8 to 45.45)  | (42.4 to 44.14)  | (41.2 to 43.17)  | (39.6 to 41.53)  | (37.9 to 40.41)  | (36.2 to 39.29)  | (34.5 to 37.92)  | (32.8 to 36.6)   | (31.1 to 35.26)  | (29.4 to 33.09)  | (27.7 to 31.32)  | (26.0 to 29.85)  | (24.3 to 28.7)   | (22.6 to 27.1)   | (20.9 to 25.5)   |
| Equatorial Guinea                | (52.8 to 59.83)  | (51.7 to 58.83)  | (50.4 to 58.01)  | (49.1 to 57.26)  | (47.8 to 56.41)  | (46.5 to 55.06)  | (45.2 to 53.61)  | (43.9 to 52.16)  | (42.6 to 50.71)  | (41.3 to 49.26)  | (40.0 to 47.81)  | (38.7 to 45      |                  |                  |                  |                  |

Appendix Table 17C. Stillbirth rates (per 1,000 live births) by location, 1996-2005

|                                  | 1996                      | 1997                      | 1998                      | 1999                      | 2000                      | 2001                      | 2002                      | 2003                      | 2004                      | 2005                      |
|----------------------------------|---------------------------|---------------------------|---------------------------|---------------------------|---------------------------|---------------------------|---------------------------|---------------------------|---------------------------|---------------------------|
| <b>Global</b>                    | 23.03<br>(21.71 to 24.46) | 22.59<br>(21.31 to 23.98) | 22.17<br>(20.96 to 23.51) | 21.76<br>(20.61 to 23.04) | 21.37<br>(20.26 to 22.57) | 20.99<br>(19.92 to 22.12) | 20.6<br>(19.57 to 21.69)  | 20.21<br>(19.22 to 21.27) | 19.79<br>(18.86 to 20.82) | 19.28<br>(18.39 to 20.27) |
| <b>High SDI</b>                  | 3.95<br>(3.83 to 4.07)    | 3.82<br>(3.72 to 3.94)    | 3.72<br>(3.61 to 3.82)    | 3.62<br>(3.53 to 3.72)    | 3.51<br>(3.43 to 3.6)     | 3.45<br>(3.37 to 3.53)    | 3.34<br>(3.27 to 3.41)    | 3.25<br>(3.18 to 3.32)    | 3.16<br>(3.09 to 3.23)    | 3.08<br>(3.01 to 3.15)    |
| <b>High-middle SDI</b>           | 11.42<br>(10.62 to 12.27) | 11.15<br>(10.41 to 11.95) | 10.86<br>(10.15 to 11.58) | 10.56<br>(9.92 to 11.23)  | 10.28<br>(9.7 to 10.87)   | 10.05<br>(9.52 to 10.62)  | 9.85<br>(9.36 to 10.37)   | 9.68<br>(9.23 to 10.16)   | 9.54<br>(9.11 to 9.99)    | 9.34<br>(8.93 to 9.78)    |
| <b>Middle SDI</b>                | 17.29<br>(16.25 to 18.46) | 16.78<br>(15.79 to 17.89) | 16.34<br>(15.41 to 17.36) | 15.93<br>(15.05 to 16.87) | 15.53<br>(14.71 to 16.38) | 15.16<br>(14.38 to 15.98) | 14.82<br>(14.08 to 15.6)  | 14.53<br>(13.84 to 15.27) | 14.25<br>(13.59 to 14.98) | 13.88<br>(13.26 to 14.59) |
| <b>Low-middle SDI</b>            | 38.42<br>(35.99 to 41.1)  | 37.48<br>(35.16 to 40.06) | 36.58<br>(34.36 to 39.04) | 35.74<br>(33.63 to 38.13) | 34.98<br>(32.96 to 37.24) | 34.26<br>(32.28 to 36.38) | 33.57<br>(31.67 to 35.59) | 32.93<br>(31.09 to 34.88) | 32.18<br>(30.45 to 34.07) | 31.3<br>(29.62 to 33.09)  |
| <b>Low SDI</b>                   | 34.94<br>(33.68 to 36.35) | 34.27<br>(33.04 to 35.65) | 33.6<br>(32.39 to 34.94)  | 32.85<br>(31.69 to 34.15) | 32.05<br>(30.93 to 33.29) | 31.18<br>(30.07 to 32.39) | 30.27<br>(29.2 to 31.44)  | 29.37<br>(28.31 to 30.52) | 28.38<br>(27.36 to 29.5)  | 27.43<br>(26.45 to 28.48) |
| <b>High-income</b>               | 3.63<br>(3.53 to 3.73)    | 3.53<br>(3.43 to 3.64)    | 3.45<br>(3.35 to 3.55)    | 3.36<br>(3.28 to 3.46)    | 3.3<br>(3.22 to 3.38)     | 3.26<br>(3.18 to 3.34)    | 3.2<br>(3.12 to 3.29)     | 3.16<br>(3.08 to 3.25)    | 3.11<br>(3.03 to 3.19)    | 3.08<br>(2.99 to 3.16)    |
| <b>High-income North America</b> | 3.29<br>(3.14 to 3.44)    | 3.23<br>(3.09 to 3.39)    | 3.2<br>(3.05 to 3.35)     | 3.15<br>(3.01 to 3.29)    | 3.07<br>(2.95 to 3.22)    | 3.01<br>(2.88 to 3.15)    | 2.97<br>(2.84 to 3.11)    | 2.93<br>(2.79 to 3.07)    | 2.88<br>(2.75 to 3.01)    | 2.88<br>(2.75 to 3.01)    |
| Canada                           | 2.37<br>(2.33 to 2.4)     | 2.33<br>(2.29 to 2.36)    | 2.27<br>(2.23 to 2.3)     | 2.24<br>(2.21 to 2.27)    | 2.2<br>(2.17 to 2.23)     | 2.2<br>(2.16 to 2.23)     | 2.19<br>(2.16 to 2.22)    | 2.18<br>(2.15 to 2.21)    | 2.16<br>(2.13 to 2.19)    | 2.18<br>(2.15 to 2.21)    |
| Greenland                        | 9.18<br>(8.62 to 9.79)    | 8.82<br>(8.27 to 9.38)    | 8.18<br>(7.67 to 8.72)    | 7.81<br>(7.31 to 8.33)    | 7.33<br>(6.87 to 7.84)    | 7.31<br>(6.84 to 7.82)    | 7.2<br>(6.73 to 7.69)     | 6.97<br>(6.52 to 7.45)    | 6.78<br>(6.34 to 7.24)    | 6.75<br>(6.29 to 7.22)    |
| United States                    | 3.37<br>(3.21 to 3.53)    | 3.31<br>(3.15 to 3.48)    | 3.28<br>(3.12 to 3.44)    | 3.22<br>(3.07 to 3.37)    | 3.14<br>(3.01 to 3.3)     | 3.08<br>(2.94 to 3.23)    | 3.04<br>(2.89 to 3.19)    | 2.99<br>(2.84 to 3.15)    | 2.94<br>(2.8 to 3.08)     | 2.93<br>(2.8 to 3.08)     |
| <b>Australasia</b>               | 3.06<br>(2.83 to 3.3)     | 2.97<br>(2.76 to 3.21)    | 2.88<br>(2.67 to 3.09)    | 2.88<br>(2.68 to 3.1)     | 2.83<br>(2.64 to 3.05)    | 2.84<br>(2.64 to 3.05)    | 2.88<br>(2.68 to 3.08)    | 2.95<br>(2.74 to 3.17)    | 3.04<br>(2.82 to 3.28)    | 3.16<br>(2.93 to 3.4)     |
| Australia                        | 2.97<br>(2.71 to 3.25)    | 2.88<br>(2.63 to 3.16)    | 2.78<br>(2.53 to 3.04)    | 2.72<br>(2.54 to 3.04)    | 2.72<br>(2.5 to 2.97)     | 2.72<br>(2.49 to 2.97)    | 2.77<br>(2.53 to 3.01)    | 2.85<br>(2.6 to 3.1)      | 2.95<br>(2.69 to 3.24)    | 3.11<br>(2.82 to 3.4)     |
| New Zealand                      | 3.42<br>(3.29 to 3.55)    | 3.39<br>(3.26 to 3.52)    | 3.33<br>(3.21 to 3.45)    | 3.32<br>(3.2 to 3.44)     | 3.35<br>(3.22 to 3.47)    | 3.36<br>(3.23 to 3.48)    | 3.4<br>(3.26 to 3.52)     | 3.39<br>(3.26 to 3.52)    | 3.4<br>(3.27 to 3.52)     | 3.36<br>(3.24 to 3.49)    |
| <b>High-income Asia Pacific</b>  | 3.38<br>(3.22 to 3.55)    | 3.18<br>(3.03 to 3.35)    | 3.06<br>(2.92 to 3.23)    | 2.9<br>(2.77 to 3.05)     | 2.81<br>(2.68 to 2.94)    | 2.74<br>(2.62 to 2.85)    | 2.67<br>(2.56 to 2.79)    | 2.63<br>(2.52 to 2.74)    | 2.53<br>(2.42 to 2.64)    | 2.41<br>(2.31 to 2.51)    |
| Brunei                           | 5.03<br>(4.69 to 5.37)    | 4.93<br>(4.63 to 5.25)    | 4.83<br>(4.56 to 5.13)    | 4.71<br>(4.46 to 4.99)    | 4.73<br>(4.48 to 5)       | 4.62<br>(4.39 to 4.87)    | 4.52<br>(4.28 to 4.76)    | 4.43<br>(4.21 to 4.67)    | 4.27<br>(4.05 to 4.49)    | 4.09<br>(3.88 to 4.3)     |
| Japan                            | 3.23<br>(3.05 to 3.42)    | 3.01<br>(2.85 to 3.2)     | 2.92<br>(2.75 to 3.09)    | 2.72<br>(2.56 to 2.88)    | 2.57<br>(2.43 to 2.72)    | 2.45<br>(2.31 to 2.59)    | 2.39<br>(2.26 to 2.53)    | 2.35<br>(2.22 to 2.49)    | 2.3<br>(2.17 to 2.44)     | 2.25<br>(2.12 to 2.39)    |
| Singapore                        | 3.38<br>(3.26 to 3.5)     | 3.23<br>(3.12 to 3.35)    | 3.15<br>(3.04 to 3.26)    | 3.01<br>(2.91 to 3.12)    | 2.88<br>(2.78 to 2.98)    | 2.77<br>(2.67 to 2.87)    | 2.7<br>(2.6 to 2.79)      | 2.61<br>(2.52 to 2.71)    | 2.53<br>(2.43 to 2.62)    | 2.48<br>(2.39 to 2.57)    |
| South Korea                      | 3.65<br>(3.41 to 3.93)    | 3.46<br>(3.23 to 3.71)    | 3.31<br>(3.09 to 3.55)    | 3.23<br>(3.02 to 3.46)    | 3.27<br>(3.07 to 3.49)    | 3.38<br>(3.17 to 3.59)    | 3.34<br>(3.13 to 3.55)    | 3.28<br>(3.08 to 3.46)    | 3.09<br>(2.91 to 3.25)    | 2.76<br>(2.61 to 2.9)     |
| <b>Western Europe</b>            | 3.37<br>(3.28 to 3.47)    | 3.3<br>(3.21 to 3.38)     | 3.18<br>(3.11 to 3.27)    | 3.09<br>(3.01 to 3.16)    | 3.02<br>(2.95 to 3.1)     | 2.98<br>(2.92 to 3.05)    | 2.86<br>(2.8 to 2.93)     | 2.8<br>(2.74 to 2.86)     | 2.72<br>(2.66 to 2.78)    | 2.63<br>(2.57 to 2.68)    |
| Andorra                          | 3.24<br>(3.21 to 3.27)    | 3.04<br>(3.02 to 3.07)    | 2.91<br>(2.89 to 2.94)    | 2.8<br>(2.78 to 2.83)     | 2.71<br>(2.68 to 2.73)    | 2.61<br>(2.58 to 2.63)    | 2.46<br>(2.44 to 2.48)    | 2.6<br>(2.58 to 2.62)     | 2.7<br>(2.68 to 2.72)     | 2.78<br>(2.75 to 2.8)     |
| Austria                          | 1.97<br>(1.92 to 2.04)    | 1.89<br>(1.84 to 1.95)    | 1.88<br>(1.83 to 1.93)    | 1.81<br>(1.77 to 1.86)    | 1.83<br>(1.78 to 1.88)    | 1.82<br>(1.78 to 1.87)    | 1.79<br>(1.7 to 1.79)     | 1.79<br>(1.75 to 1.83)    | 1.77<br>(1.73 to 1.82)    | 1.75<br>(1.71 to 1.79)    |
| Belgium                          | 3.71<br>(3.36 to 4.08)    | 3.46<br>(3.14 to 3.79)    | 3.22<br>(2.92 to 3.52)    | 2.97<br>(2.71 to 3.26)    | 2.81<br>(2.56 to 3.07)    | 2.65<br>(2.43 to 2.88)    | 2.5<br>(2.29 to 2.72)     | 2.39<br>(2.19 to 2.61)    | 2.27<br>(2.08 to 2.48)    | 2.21<br>(2.02 to 2.43)    |
| Cyprus                           | 4.32<br>(4.14 to 4.52)    | 4.2<br>(4.02 to 4.39)     | 4.07<br>(3.9 to 4.25)     | 3.9<br>(3.73 to 4.07)     | 3.75<br>(3.59 to 3.91)    | 3.58<br>(3.43 to 3.74)    | 3.53<br>(3.37 to 3.69)    | 3.41<br>(3.26 to 3.57)    | 3.32<br>(3.18 to 3.48)    | 3.31<br>(3.16 to 3.46)    |
| Denmark                          | 2.58<br>(2.41 to 2.77)    | 2.49<br>(2.33 to 2.67)    | 2.36<br>(2.2 to 2.52)     | 2.21<br>(2.06 to 2.36)    | 2.15<br>(2.0 to 2.3)      | 2.07<br>(1.93 to 2.23)    | 1.98<br>(1.84 to 2.13)    | 1.91<br>(1.77 to 2.06)    | 1.82<br>(1.68 to 1.97)    | 1.72<br>(1.58 to 1.87)    |
| Finland                          | 1.78<br>(1.72 to 1.84)    | 1.79<br>(1.73 to 1.85)    | 1.77<br>(1.71 to 1.82)    | 1.71<br>(1.65 to 1.76)    | 1.63<br>(1.58 to 1.69)    | 1.53<br>(1.49 to 1.58)    | 1.48<br>(1.43 to 1.52)    | 1.55<br>(1.5 to 1.6)      | 1.62<br>(1.57 to 1.67)    | 1.63<br>(1.53 to 1.63)    |
| France                           | 4.7<br>(4.59 to 4.8)      | 4.64<br>(4.54 to 4.75)    | 4.48<br>(4.38 to 4.58)    | 4.28<br>(4.19 to 4.37)    | 4.37<br>(4.28 to 4.47)    | 4.44<br>(4.34 to 4.54)    | 4.3<br>(4.03 to 4.22)     | 4.08<br>(3.98 to 4.17)    | 3.96<br>(3.87 to 4.05)    | 3.7<br>(3.61 to 3.79)     |
| Germany                          | 2.11<br>(2.09 to 2.13)    | 2.12<br>(2.1 to 2.14)     | 2.03<br>(2.01 to 2.05)    | 1.97<br>(1.95 to 1.99)    | 1.94<br>(1.92 to 1.95)    | 1.91<br>(1.9 to 1.93)     | 1.87<br>(1.86 to 1.89)    | 1.87<br>(1.85 to 1.88)    | 1.85<br>(1.83 to 1.86)    | 1.84<br>(1.76 to 1.79)    |
| Greece                           | 3<br>(2.94 to 3.06)       | 2.87<br>(2.81 to 2.93)    | 2.81<br>(2.76 to 2.87)    | 2.73<br>(2.67 to 2.79)    | 2.63<br>(2.58 to 2.69)    | 2.55<br>(2.49 to 2.6)     | 2.5<br>(2.45 to 2.56)     | 2.5<br>(2.28 to 2.38)     | 2.4<br>(2.2 to 2.29)      | 2.3<br>(2.08 to 2.17)     |
| Iceland                          | 2.04<br>(1.83 to 2.26)    | 1.97<br>(1.77 to 2.19)    | 1.74<br>(1.67 to 2.07)    | 1.71<br>(1.57 to 1.93)    | 1.65<br>(1.54 to 1.89)    | 1.65<br>(1.49 to 1.82)    | 1.62<br>(1.46 to 1.79)    | 1.57<br>(1.42 to 1.73)    | 1.53<br>(1.38 to 1.69)    | 1.5<br>(1.36 to 1.66)     |
| Ireland                          | 3.41<br>(3.23 to 3.58)    | 3.37<br>(3.2 to 3.54)     | 3.32<br>(3.15 to 3.49)    | 3.29<br>(3.13 to 3.46)    | 3.24<br>(3.08 to 3.4)     | 3.23<br>(3.08 to 3.39)    | 3.13<br>(2.98 to 3.29)    | 3.06<br>(2.91 to 3.21)    | 2.99<br>(2.75 to 3.03)    | 2.67<br>(2.54 to 2.8)     |
| Israel                           | 2.68<br>(2.47 to 2.91)    | 2.7<br>(2.5 to 2.93)      | 2.72<br>(2.49 to 2.92)    | 2.72<br>(2.51 to 2.94)    | 2.68<br>(2.52 to 2.93)    | 2.68<br>(2.49 to 2.88)    | 2.68<br>(2.51 to 2.92)    | 2.7<br>(2.51 to 2.92)     | 2.62<br>(2.44 to 2.82)    | 2.56<br>(2.38 to 2.77)    |
| Italy                            | 3<br>(2.77 to 3.27)       | 2.9<br>(2.67 to 3.15)     | 2.72<br>(2.49 to 2.96)    | 2.64<br>(2.43 to 2.87)    | 2.43<br>(2.24 to 2.62)    | 2.42<br>(2.24 to 2.61)    | 2.31<br>(2.13 to 2.48)    | 2.08<br>(1.93 to 2.23)    | 1.94<br>(1.79 to 2.08)    | 1.84<br>(1.71 to 1.97)    |
| Luxembourg                       | 2.16<br>(1.9 to 2.45)     | 2.08<br>(1.84 to 2.35)    | 2.1<br>(1.92 to 2.45)     | 1.98<br>(1.86 to 2.36)    | 1.98<br>(1.75 to 2.23)    | 2.17<br>(1.92 to 2.45)    | 2.13<br>(1.88 to 2.4)     | 2.1<br>(1.87 to 2.37)     | 2.01<br>(1.78 to 2.26)    | 1.92<br>(1.7 to 2.17)     |
| Malta                            | 3.45<br>(3.41 to 3.49)    | 3.19<br>(3.16 to 3.23)    | 2.98<br>(2.95 to 3.01)    | 2.99<br>(2.95 to 3.02)    | 2.9<br>(2.87 to 2.93)     | 2.81<br>(2.78 to 2.84)    | 2.83<br>(2.8 to 2.86)     | 2.77<br>(2.74 to 2.8)     | 2.84<br>(2.81 to 2.87)    | 2.79<br>(2.76 to 2.82)    |
| Netherlands                      | 4.78<br>(4.21 to 5.41)    | 4.51<br>(4.01 to 5.01)    | 4.24<br>(3.82 to 4.72)    | 3.96<br>(3.54 to 4.37)    | 3.56<br>(3.2 to 3.93)     | 3.18<br>(2.88 to 3.51)    | 2.88<br>(2.59 to 3.19)    | 2.65<br>(2.39 to 2.93)    | 2.43<br>(2.2 to 2.69)     | 2.38<br>(2.13 to 2.63)    |
| Norway                           | 2.22<br>(2.15 to 2.31)    | 2.22<br>(2.14 to 2.3)     | 2.21<br>(2.14 to 2.29)    | 2.19<br>(2.12 to 2.27)    | 2.14<br>(2.07 to 2.21)    | 2.14<br>(2.04 to 2.18)    | 2.05<br>(1.97 to 2.12)    | 2.05<br>(1.94 to 2.08)    | 2.01<br>(1.87 to 2.01)    | 1.94<br>(1.8 to 1.93)     |
| Portugal                         | 3.16<br>(3.09 to 3.23)    | 3.05<br>(2.98 to 3.12)    | 2.96<br>(2.89 to 3.03)    | 2.86<br>(2.8 to 2.93)     | 2.82<br>(2.75 to 2.88)    | 2.7<br>(2.63 to 2.76)     | 2.63<br>(2.57 to 2.69)    | 2.44<br>(2.39 to 2.5)     | 2.35<br>(2.3 to 2.4)      | 2.24<br>(2.19 to 2.29)    |
| Spain                            | 2.16<br>(2.04 to 2.28)    | 2.05<br>(1.94 to 2.16)    | 1.92<br>(1.82 to 2.03)    | 1.81<br>(1.72 to 1.91)    | 1.75<br>(1.66 to 1.85)    | 1.65<br>(1.57 to 1.74)    | 1.65<br>(1.57 to 1.74)    | 1.65<br>(1.55 to 1.72)    | 1.6<br>(1.52 to 1.68)     | 1.54<br>(1.46 to 1.62)    |
| Sweden                           | 2.16<br>(2 to 2.33)       | 2.17<br>(2.01 to 2.34)    | 2.18<br>(2.02 to 2.34)    | 2.16<br>(2.01 to 2.32)    | 2.15<br>(2.0 to 2.3)      | 2.15<br>(2.03 to 2.34)    | 2.1<br>(1.96 to 2.26)     | 2.05<br>(1.91 to 2.2)     | 2.02<br>(1.87 to 2.18)    | 1.9<br>(1.75 to 2.05)     |
| Switzerland                      | 2<br>(1.9 to 2.11)        | 1.96<br>(1.86 to 2.07)    | 1.92<br>(1.82 to 2.03)    | 1.91<br>(1.81 to 2.03)    | 1.93<br>(1.82 to 2.05)    | 1.95<br>(1.83 to 2.07)    | 1.91<br>(1.81 to 2.03)    | 1.91<br>(1.76 to 1.97)    | 1.86<br>(1.75 to 1.97)    | 1.84<br>(1.72 to 1.95)    |
| <b>United Kingdom</b>            | 4.84<br>(4.72 to 4.96)    | 4.75<br>(4.63 to 4.87)    | 4.68<br>(4.57 to 4.8)     | 4.67<br>(4.55 to 4.78)    | 4.6<br>(4.48 to 4.71)     | 4.52<br>(4.41 to 4.63)    | 4.44<br>(4.33 to 4.54)    | 4.44<br>(4.33 to 4.54)    | 4.44<br>(4.24 to 4.44)    | 4.3<br>(4.2 to 4.4)       |
| England                          | 4.38<br>(4.28 to 4.49)    | 4.31<br>(4.21 to 4.42)    | 4.23<br>(4.14 to 4.34)    | 4.23<br>(4.13 to 4.33)    | 4.16<br>(4.06 to 4.26)    | 4.08<br>(3.99 to 4.18)    | 4.02<br>(3.93 to 4.11)    | 4.05<br>(3.96 to 4.14)    | 3.94<br>(3.85 to 4.03)    | 3.88<br>(3.8 to 3.98)     |
| Northern Ireland                 | 7.1<br>(6.93 to 7.28)     | 6.88<br>(6.71 to 7.07)    | 6.85<br>(6.68 to 7.04)    | 7.1<br>(6.92 to 7.3)      | 6.63<br>(6.47 to 6.81)    | 6.68<br>(6.53 to 6.86)    | 6.41<br>(6.27 to 6.56)    | 6.28<br>(6.15 to 6.42)    | 6.35<br>(6.22 to 6.49)    | 6.55<br>(6.42 to 6.69)    |
| Scotland                         | 7.56<br>(7.36 to 7.75)    | 7.29<br>(7.08 to 7.49)    | 7.38<br>(7.16 to 7.61)    | 7.11<br>(6.89 to 7.34)    | 7.27<br>(7.04 to 7.52)    | 7.27<br>(6.95 to 7.43)    | 7.1<br>(6.97 to 7.46)     | 7.09<br>(6.85 to 7.34)    | 7.11<br>(6.73 to 7.22)    | 7.11<br>(6.86 to 7.35)    |
| Wales                            | 6.6<br>(6.41 to 6.77)     | 6.62<br>(6.42 to 6.81)    | 6.58<br>(6.38 to 6.78)    | 6.73<br>(6.53 to 6.95)    | 6.57<br>(6.36 to 6.8)     | 6.45<br>(6.23 to 6.68)    | 6.24<br>(6.02 to 6.47)    | 5.97<br>(5.75 to 6.19)    | 6.13<br>(5.9 to 6.35)     | 5.94<br>(5.73 to 6.15)    |
| <b>Southern Latin America</b>    | 7.03<br>(6.56 to 7.54)    | 6.83<br>(6.39 to 7.31)    | 6.64<br>(6.18 to 7.14)    | 6.53<br>(6.09 to 6.99)    | 6.51<br>(6.08 to 6.92)    | 6.53<br>(6.07 to 6.98)    | 6.4<br>(6.16 to 7.13)     | 6.73<br>(6.26 to 7.26)    | 6.84<br>(6.38 to 7.33)    | 7.01<br>(6.49 to 7.58)    |
| Argentina                        | 7.85<br>(7.25 to 8.48)    | 7.54<br>(6.99 to 8.14)    | 7.25<br>(6.73 to 7.79)    | 7.05<br>(6.55 to 7.62)    | 6.94<br>(6.41 to 7.45)    | 6.84<br>(6.33 to 7.36)    | 6.82<br>(6.31 to 7.34)    | 6.71<br>(6.23 to 7.25)    | 6.69<br>(6.21 to 7.24)    | 6.78<br>(6.27 to 7.32)    |
| Chile                            | 4.62<br>(3.92 to 5.37)    | 4.56<br>(3.89 to 5.28)    | 4.58<br>(3.89 to 5.28)    | 4.69<br>(3.94 to 5.46)    | 4.92<br>(4.2 to 5.77)     | 5.27<br>(4.47 to 6.22)    | 5.73<br>(4.85 to 6.75)    | 6.32<br>(5.33 to 7.36)    | 6.98<br>(5.95 to 8.07)    | 7.64<br>(6.5 to 8.86)     |
| Uruguay                          | 9.72<br>(8.87 to 10.67)   | 9.39<br>(8.58 to 10.21)   | 9.07<br>(8.24 to 9.89)    | 8.65<br>(7.89 to 9.4      |                           |                           |                           |                           |                           |                           |



Appendix Table 17C. Stillbirth rates (per 1,000 live births) by location, 1996-2005

|                                    | 1996                      | 1997                      | 1998                      | 1999                      | 2000                      | 2001                      | 2002                      | 2003                      | 2004                      | 2005                      |
|------------------------------------|---------------------------|---------------------------|---------------------------|---------------------------|---------------------------|---------------------------|---------------------------|---------------------------|---------------------------|---------------------------|
| Latvia                             | 5.82<br>(5.65 to 6.01)    | 5.52<br>(5.36 to 5.69)    | 5.18<br>(5.04 to 5.33)    | 4.46<br>(4.35 to 4.59)    | 4.04<br>(3.95 to 4.15)    | 4.03<br>(3.94 to 4.13)    | 4.03<br>(3.94 to 4.12)    | 3.87<br>(3.79 to 3.94)    | 3.56<br>(3.49 to 3.62)    | 3.29<br>(3.24 to 3.34)    |
| Lithuania                          | 3.69<br>(3.55 to 3.82)    | 3.68<br>(3.55 to 3.81)    | 3.38<br>(3.26 to 3.5)     | 3.2<br>(3.09 to 3.31)     | 3.21<br>(3.11 to 3.32)    | 3.01<br>(2.92 to 3.11)    | 3<br>(2.91 to 3.1)        | 2.68<br>(2.6 to 2.76)     | 2.9<br>(2.81 to 2.99)     | 2.72<br>(2.64 to 2.81)    |
| Moldova                            | 9.06<br>(8.58 to 9.58)    | 8.95<br>(8.47 to 9.47)    | 8.82<br>(8.34 to 9.34)    | 8.67<br>(8.2 to 9.17)     | 8.32<br>(7.87 to 8.8)     | 7.79<br>(7.37 to 8.24)    | 7<br>(6.62 to 7.4)        | 6.28<br>(5.94 to 6.64)    | 5.75<br>(5.45 to 6.08)    | 5.45<br>(5.16 to 5.77)    |
| Russia                             | 5.88<br>(5.74 to 6.02)    | 5.78<br>(5.65 to 5.91)    | 5.64<br>(5.51 to 5.77)    | 5.67<br>(5.55 to 5.8)     | 5.35<br>(5.22 to 5.46)    | 5.16<br>(5.05 to 5.28)    | 4.76<br>(4.67 to 4.86)    | 4.45<br>(4.37 to 4.54)    | 4.18<br>(4.1 to 4.26)     | 3.98<br>(3.9 to 4.06)     |
| Ukraine                            | 6.34<br>(6.26 to 6.42)    | 6.31<br>(6.23 to 6.39)    | 6.27<br>(6.19 to 6.35)    | 6.21<br>(6.13 to 6.29)    | 6.09<br>(6.01 to 6.17)    | 5.84<br>(5.77 to 5.92)    | 5.54<br>(5.47 to 5.62)    | 5.25<br>(5.18 to 5.32)    | 4.94<br>(4.87 to 5)       | 4.73<br>(4.67 to 4.79)    |
| <b>Central Europe</b>              | 5.5<br>(5.14 to 5.9)      | 5.17<br>(4.86 to 5.51)    | 4.91<br>(4.63 to 5.21)    | 4.64<br>(4.4 to 4.92)     | 4.45<br>(4.24 to 4.68)    | 4.27<br>(4.11 to 4.47)    | 4.15<br>(4.01 to 4.3)     | 4.04<br>(3.93 to 4.16)    | 3.99<br>(3.88 to 4.1)     | 3.81<br>(3.71 to 3.9)     |
| Albania                            | 5.66<br>(5.57 to 5.75)    | 5.66<br>(5.57 to 5.75)    | 5.65<br>(5.56 to 5.75)    | 5.66<br>(5.56 to 5.75)    | 5.69<br>(5.6 to 5.79)     | 5.7<br>(5.61 to 5.8)      | 5.73<br>(5.63 to 5.82)    | 5.75<br>(5.65 to 5.84)    | 5.72<br>(5.63 to 5.82)    | 5.69<br>(5.6 to 5.79)     |
| Bosnia and Herzegovina             | 5.87<br>(5.34 to 6.43)    | 5.57<br>(5.12 to 6.04)    | 5.33<br>(4.93 to 5.78)    | 5.07<br>(4.67 to 5.46)    | 4.78<br>(4.44 to 5.12)    | 4.55<br>(4.24 to 4.89)    | 4.58<br>(4.26 to 4.9)     | 4.58<br>(4.25 to 4.91)    | 4.54<br>(4.2 to 4.88)     | 4.51<br>(4.18 to 4.85)    |
| Bulgaria                           | 4.69<br>(3.94 to 5.6)     | 5.11<br>(4.33 to 6.09)    | 4.52<br>(3.83 to 5.35)    | 4.54<br>(3.86 to 5.29)    | 4.23<br>(3.62 to 4.9)     | 4.3<br>(3.72 to 4.96)     | 4.19<br>(3.65 to 4.79)    | 4.11<br>(3.59 to 4.66)    | 4.23<br>(3.71 to 4.77)    | 3.98<br>(3.52 to 4.47)    |
| Croatia                            | 3.62<br>(3.45 to 3.8)     | 3.6<br>(3.43 to 3.76)     | 3.51<br>(3.36 to 3.67)    | 3.46<br>(3.32 to 3.6)     | 3.39<br>(3.26 to 3.54)    | 3.33<br>(3.2 to 3.47)     | 3.22<br>(3.1 to 3.36)     | 3.09<br>(2.97 to 3.21)    | 2.99<br>(2.87 to 3.1)     | 2.9<br>(2.79 to 3.02)     |
| Czech Republic                     | 2.38<br>(2.22 to 2.57)    | 2.4<br>(2.24 to 2.56)     | 2.3<br>(2.15 to 2.45)     | 2.15<br>(2.02 to 2.29)    | 2.04<br>(1.91 to 2.16)    | 1.99<br>(1.87 to 2.11)    | 2.05<br>(1.93 to 2.17)    | 2.01<br>(1.9 to 2.13)     | 1.96<br>(1.85 to 2.08)    | 1.89<br>(1.78 to 2)       |
| Hungary                            | 3.71<br>(3.55 to 3.89)    | 3.55<br>(3.4 to 3.73)     | 3.42<br>(3.28 to 3.57)    | 3.16<br>(3.03 to 3.3)     | 3.22<br>(3.09 to 3.36)    | 3.02<br>(2.9 to 3.14)     | 2.82<br>(2.71 to 2.94)    | 2.77<br>(2.66 to 2.87)    | 2.66<br>(2.56 to 2.76)    | 2.59<br>(2.5 to 2.69)     |
| Macedonia                          | 10.6<br>(9.57 to 11.74)   | 10.25<br>(9.31 to 11.23)  | 10.67<br>(9.73 to 11.67)  | 10.23<br>(9.36 to 11.16)  | 9.35<br>(8.58 to 10.14)   | 8.92<br>(8.16 to 9.6)     | 8.94<br>(8.23 to 9.58)    | 9.47<br>(8.78 to 10.15)   | 9.78<br>(9.13 to 10.46)   | 9.48<br>(8.93 to 10.04)   |
| Montenegro                         | 5.67<br>(5.3 to 6.07)     | 5.81<br>(5.44 to 6.21)    | 5.93<br>(5.54 to 6.34)    | 6<br>(5.55 to 6.41)       | 5.91<br>(5.46 to 6.32)    | 5.61<br>(5.21 to 6.03)    | 5.19<br>(4.82 to 5.59)    | 4.8<br>(4.45 to 5.16)     | 4.47<br>(4.12 to 4.8)     | 4.24<br>(3.92 to 4.57)    |
| Poland                             | 5.35<br>(4.35 to 6.53)    | 4.4<br>(3.55 to 5.35)     | 3.86<br>(3.13 to 4.72)    | 3.52<br>(2.87 to 4.27)    | 3.1<br>(2.59 to 3.69)     | 2.83<br>(2.4 to 3.33)     | 2.69<br>(2.34 to 3.09)    | 2.51<br>(2.24 to 2.78)    | 2.43<br>(2.21 to 2.64)    | 2.35<br>(2.18 to 2.54)    |
| Romania                            | 7.23<br>(7.18 to 7.28)    | 7.35<br>(7.31 to 7.4)     | 7.25<br>(7.21 to 7.3)     | 6.87<br>(6.83 to 6.92)    | 6.98<br>(6.93 to 7.03)    | 6.93<br>(6.88 to 6.97)    | 6.66<br>(6.61 to 6.7)     | 6.49<br>(6.44 to 6.53)    | 6.64<br>(6.6 to 6.69)     | 6.29<br>(6.25 to 6.34)    |
| Serbia                             | 7.6<br>(7.22 to 7.97)     | 7.2<br>(6.85 to 7.55)     | 6.94<br>(6.62 to 7.27)    | 6.81<br>(6.51 to 7.11)    | 6.72<br>(6.43 to 7.02)    | 6.66<br>(6.38 to 6.96)    | 6.59<br>(6.3 to 6.88)     | 6.47<br>(6.2 to 6.75)     | 6.26<br>(6.02 to 6.52)    | 6.02<br>(5.79 to 6.26)    |
| Slovakia                           | 3.4<br>(3.27 to 3.53)     | 3.13<br>(3.02 to 3.25)    | 3.14<br>(3.03 to 3.26)    | 2.98<br>(2.87 to 3.08)    | 2.98<br>(2.88 to 3.08)    | 2.63<br>(2.54 to 2.72)    | 2.65<br>(2.57 to 2.74)    | 2.77<br>(2.68 to 2.86)    | 2.69<br>(2.6 to 2.77)     | 2.67<br>(2.59 to 2.76)    |
| Slovenia                           | 2.63<br>(2.47 to 2.79)    | 2.6<br>(2.45 to 2.76)     | 2.59<br>(2.44 to 2.74)    | 2.55<br>(2.41 to 2.7)     | 2.52<br>(2.38 to 2.66)    | 2.48<br>(2.34 to 2.62)    | 2.45<br>(2.31 to 2.6)     | 2.42<br>(2.28 to 2.57)    | 2.39<br>(2.26 to 2.54)    | 2.36<br>(2.23 to 2.5)     |
| <b>Central Asia</b>                | 12.38<br>(12.06 to 12.72) | 12.16<br>(11.85 to 12.48) | 11.86<br>(11.56 to 12.17) | 11.49<br>(11.21 to 11.81) | 11.11<br>(10.83 to 11.41) | 10.78<br>(10.51 to 11.08) | 10.57<br>(10.3 to 10.86)  | 10.42<br>(10.15 to 10.7)  | 10.27<br>(10.01 to 10.54) | 10.09<br>(9.83 to 10.35)  |
| Armenia                            | 8.92<br>(8.2 to 9.68)     | 8.44<br>(7.81 to 9.13)    | 8<br>(7.46 to 8.6)        | 7.65<br>(7.15 to 8.17)    | 7.42<br>(6.98 to 7.88)    | 7.37<br>(6.97 to 7.8)     | 7.43<br>(7.05 to 7.84)    | 7.48<br>(7.1 to 7.86)     | 7.53<br>(7.15 to 7.9)     | 7.57<br>(7.19 to 7.93)    |
| Azerbaijan                         | 16.9<br>(16.32 to 17.55)  | 16.65<br>(16.07 to 17.3)  | 16.41<br>(15.82 to 17.04) | 15.85<br>(15.28 to 16.45) | 14.96<br>(14.43 to 15.52) | 14.02<br>(13.53 to 14.56) | 13.55<br>(13.05 to 14.08) | 13.43<br>(12.94 to 13.95) | 13.47<br>(12.96 to 13.98) | 13.29<br>(12.78 to 13.79) |
| Georgia                            | 11.75<br>(11.14 to 12.4)  | 11.56<br>(10.99 to 12.18) | 11.3<br>(10.77 to 11.87)  | 10.97<br>(10.47 to 11.5)  | 10.55<br>(10.06 to 11.04) | 10.05<br>(9.59 to 10.52)  | 9.58<br>(9.14 to 10.02)   | 9.1<br>(8.68 to 9.55)     | 8.68<br>(8.27 to 9.12)    | 8.29<br>(7.88 to 8.73)    |
| Kazakhstan                         | 10.19<br>(9.81 to 10.54)  | 10.12<br>(9.77 to 10.47)  | 9.98<br>(9.64 to 10.3)    | 9.83<br>(9.52 to 10.14)   | 9.67<br>(9.38 to 9.95)    | 9.58<br>(9.31 to 9.85)    | 9.52<br>(9.27 to 9.77)    | 9.29<br>(9.17 to 9.61)    | 9.21<br>(9.03 to 9.39)    | 8.97<br>(8.82 to 9.12)    |
| Kyrgyzstan                         | 14.68<br>(14.17 to 15.21) | 14.35<br>(13.85 to 14.87) | 14.03<br>(13.53 to 14.52) | 13.72<br>(13.24 to 14.22) | 13.4<br>(12.93 to 13.91)  | 12.97<br>(12.67 to 13.64) | 12.76<br>(12.51 to 13.45) | 12.51<br>(12.3 to 13.23)  | 12.51<br>(12.07 to 12.97) | 12.31<br>(11.85 to 12.77) |
| Mongolia                           | 13.21<br>(12.73 to 13.72) | 12.79<br>(12.33 to 13.3)  | 12.36<br>(11.9 to 12.86)  | 11.97<br>(11.52 to 12.44) | 11.62<br>(11.2 to 12.07)  | 11.27<br>(10.86 to 11.71) | 10.97<br>(10.57 to 11.4)  | 10.67<br>(10.29 to 11.08) | 10.35<br>(9.97 to 10.75)  | 10.05<br>(9.67 to 10.43)  |
| Tajikistan                         | 15.45<br>(15.06 to 15.88) | 15.05<br>(14.69 to 15.47) | 14.55<br>(14.19 to 14.95) | 14<br>(13.66 to 14.39)    | 13.46<br>(13.13 to 13.82) | 12.97<br>(12.66 to 13.31) | 12.53<br>(12.23 to 12.84) | 12.07<br>(11.78 to 12.37) | 11.56<br>(11.28 to 11.84) | 11.04<br>(10.77 to 11.3)  |
| Turkmenistan                       | 14.64<br>(14.4 to 14.87)  | 14.6<br>(14.36 to 14.83)  | 14.43<br>(14.18 to 14.67) | 14.21<br>(13.96 to 14.44) | 13.79<br>(13.54 to 14.01) | 13.39<br>(13.15 to 13.61) | 13.03<br>(12.8 to 13.24)  | 12.66<br>(12.44 to 12.87) | 12.27<br>(12.06 to 12.47) | 11.83<br>(11.65 to 12.05) |
| Uzbekistan                         | 10.82<br>(10.43 to 11.24) | 10.61<br>(10.22 to 11.03) | 10.29<br>(9.9 to 10.7)    | 9.93<br>(9.55 to 10.31)   | 9.61<br>(9.26 to 9.99)    | 9.39<br>(9.05 to 9.76)    | 9.28<br>(8.94 to 9.64)    | 9.26<br>(8.93 to 9.62)    | 9.24<br>(8.9 to 9.6)      | 9.19<br>(8.84 to 9.54)    |
| <b>Latin America and Caribbean</b> | 11.31<br>(10.34 to 12.38) | 10.93<br>(10.06 to 11.92) | 10.59<br>(9.81 to 11.49)  | 10.27<br>(9.56 to 11.1)   | 9.94<br>(9.28 to 10.67)   | 9.64<br>(9.06 to 10.29)   | 9.38<br>(8.84 to 10)      | 9.14<br>(8.63 to 9.71)    | 8.89<br>(8.41 to 9.43)    | 8.64<br>(8.18 to 9.16)    |
| <b>Central Latin America</b>       | 8.87<br>(8.39 to 9.37)    | 8.63<br>(8.16 to 9.11)    | 8.41<br>(7.95 to 8.87)    | 8.21<br>(7.77 to 8.66)    | 8.01<br>(7.59 to 8.46)    | 7.83<br>(7.43 to 8.27)    | 7.67<br>(7.28 to 8.09)    | 7.53<br>(7.14 to 7.93)    | 7.38<br>(7.0 to 7.77)     | 7.22<br>(6.85 to 7.62)    |
| Colombia                           | 12.27<br>(11.03 to 13.61) | 12.12<br>(10.9 to 13.47)  | 12.03<br>(10.84 to 13.35) | 11.96<br>(10.8 to 13.24)  | 11.81<br>(10.71 to 13.15) | 11.81<br>(10.64 to 13.05) | 11.72<br>(10.62 to 12.94) | 11.65<br>(10.56 to 12.84) | 11.56<br>(10.47 to 12.73) | 11.44<br>(10.4 to 12.62)  |
| Costa Rica                         | 7.72<br>(7.39 to 8.06)    | 7.57<br>(7.24 to 7.88)    | 7.41<br>(7.1 to 7.73)     | 7.27<br>(6.97 to 7.59)    | 7.17<br>(6.88 to 7.46)    | 7.1<br>(6.82 to 7.39)     | 7.04<br>(6.76 to 7.32)    | 6.98<br>(6.71 to 7.26)    | 6.93<br>(6.66 to 7.21)    | 6.88<br>(6.62 to 7.16)    |
| El Salvador                        | 9.98<br>(9.73 to 10.24)   | 9.7<br>(9.46 to 9.96)     | 9.4<br>(9.16 to 9.66)     | 9.04<br>(8.81 to 9.28)    | 8.69<br>(8.47 to 8.92)    | 8.37<br>(8.17 to 8.59)    | 8.08<br>(7.88 to 8.3)     | 7.8<br>(7.61 to 8.01)     | 7.5<br>(7.31 to 7.69)     | 7.15<br>(6.97 to 7.34)    |
| Guatemala                          | 13.74<br>(12.38 to 15.21) | 13.23<br>(11.99 to 14.54) | 12.63<br>(11.5 to 13.81)  | 12.08<br>(11.06 to 13.13) | 11.56<br>(10.62 to 12.51) | 11.14<br>(10.26 to 12.05) | 10.72<br>(9.9 to 11.57)   | 10.34<br>(9.57 to 11.13)  | 9.94<br>(9.21 to 10.71)   | 9.4<br>(8.9 to 10.34)     |
| Honduras                           | 12.63<br>(12.85 to 12.99) | 12.57<br>(12.57 to 12.7)  | 12.36<br>(12.29 to 12.42) | 12.14<br>(12.08 to 12.2)  | 11.88<br>(11.82 to 11.95) | 11.58<br>(11.58 to 11.71) | 11.4<br>(11.34 to 11.46)  | 11.17<br>(11.11 to 11.23) | 10.95<br>(10.89 to 11.01) | 10.72<br>(10.66 to 10.78) |
| Mexico                             | 6.7<br>(6.42 to 6.98)     | 6.52<br>(6.25 to 6.78)    | 6.35<br>(6.09 to 6.6)     | 6.2<br>(5.96 to 6.44)     | 6.05<br>(5.82 to 6.28)    | 5.9<br>(5.69 to 6.13)     | 5.77<br>(5.56 to 5.99)    | 5.65<br>(5.45 to 5.86)    | 5.52<br>(5.32 to 5.73)    | 5.4<br>(5.2 to 5.6)       |
| Nicaragua                          | 10.75<br>(10.61 to 10.91) | 10.39<br>(10.25 to 10.55) | 10.03<br>(9.9 to 10.18)   | 9.66<br>(9.53 to 9.81)    | 9.33<br>(9.2 to 9.46)     | 9<br>(8.88 to 9.14)       | 8.71<br>(8.58 to 8.84)    | 8.43<br>(8.31 to 8.56)    | 8.18<br>(8.06 to 8.3)     | 7.94<br>(7.83 to 8.06)    |
| Panama                             | 6.83<br>(6.51 to 7.19)    | 6.76<br>(6.47 to 7.07)    | 6.69<br>(6.43 to 6.97)    | 6.59<br>(6.39 to 6.89)    | 6.53<br>(6.37 to 6.8)     | 6.53<br>(6.33 to 6.73)    | 6.45<br>(6.27 to 6.63)    | 6.4<br>(6.23 to 6.57)     | 6.35<br>(6.2 to 6.49)     | 6.26<br>(6.13 to 6.39)    |
| Venezuela                          | 9.09<br>(8.54 to 9.61)    | 8.69<br>(8.18 to 9.18)    | 8.26<br>(7.81 to 8.73)    | 7.88<br>(7.47 to 8.31)    | 7.55<br>(7.17 to 7.94)    | 7.23<br>(6.88 to 7.61)    | 7.02<br>(6.67 to 7.37)    | 6.88<br>(6.53 to 7.23)    | 6.66<br>(6.31 to 7.01)    | 6.42<br>(6.08 to 6.76)    |
| <b>Andean Latin America</b>        | 16.19<br>(14.15 to 18.63) | 15.4<br>(13.51 to 17.64)  | 14.69<br>(12.92 to 16.71) | 14.04<br>(12.36 to 15.95) | 13.44<br>(11.85 to 15.24) | 12.87<br>(11.39 to 14.53) | 12.32<br>(10.94 to 13.87) | 11.81<br>(10.54 to 13.24) | 11.29<br>(10.13 to 12.59) | 10.74<br>(9.68 to 11.9)   |
| Bolivia                            | 23.74<br>(19.73 to 28.55) | 22.73<br>(18.82 to 27.35) | 21.73<br>(17.97 to 26.2)  | 20.79<br>(17.15 to 24.98) | 19.88<br>(16.46 to 23.88) | 18.99<br>(15.82 to 22.75) | 18.15<br>(15.07 to 21.74) | 17.34<br>(14.46 to 20.78) | 16.5<br>(13.64 to 19.73)  | 15.61<br>(12.86 to 18.65) |
| Ecuador                            | 12.08<br>(9.96 to 14.81)  | 11.69<br>(9.74 to 14.27)  | 11.33<br>(9.57 to 13.71)  | 11.01<br>(9.38 to 13.23)  | 10.66<br>(9.11 to 12.61)  | 10.27<br>(8.83 to 12.02)  | 9.89<br>(8.61 to 11.42)   | 9.53<br>(8.37 to 10.87)   | 9.15<br>(8.15 to 10.33)   | 8.72<br>(7.83 to 9.69)    |
| Peru                               | 15.21<br>(13.24 to 17.53) | 14.26<br>(12.47 to 16.35) | 13.43<br>(11.77 to 15.29) | 12.7<br>(11.2 to 14.31)   | 12.07<br>(10.74 to 13.54) | 11.53<br>(10.33 to 12.82) | 11.02<br>(9.91 to 12.22)  | 10.55<br>(9.5 to 11.58)   | 10.11<br>(9.19 to 11.04)  | 9.66<br>(8.78 to 10.55)   |
| <b>Caribbean</b>                   | 21.65<br>(18.87 to 25.06) | 21.29<br>(18.6 to 24.65)  | 20.68<br>(18.37 to 24.35) | 20.35<br>(18.09 to 23.85) | 20.35<br>(17.83 to 23.46) | 20.17<br>(17.65 to 23.29) | 20.16<br>(17.64 to 23.2)  | 20.2<br>(17.6 to 23.32)   | 20.1<br>(17.73 to 23.41)  | 20.41<br>(17.71 to 23.63) |
| Antigua and Barbuda                | 11.95<br>(9.82 to 14.67)  | 11.95<br>(9.8 to 14.67)   | 11.88<br>(9.69 to 14.57)  | 11.96<br>(9.75 to 14.6)   | 11.94<br>(9.75 to 14.56)  | 11.89<br>(9.72 to 14.56)  | 11.69<br>(9.46 to 14.35)  | 11.22<br>(9.12 to 13.8)   | 11.32<br>(9.13 to 13.82)  | 10.74<br>(8.64 to 13.11)  |
| The Bahamas                        | 10.47<br>(9.32 to 11.71)  | 10.42<br>(9.33 to 11.5)   | 10.18<br>(9.22 to 11.17)  | 10.23<br>(9.33 to 11.19)  | 10.44<br>(9.57 to 11.39)  | 10.69<br>(9.82 to 11.59)  | 11.95<br>(11.03 to 12.89) | 12.08<br>(11.24 to 13)    | 12.79<br>(11.93 to 13.66) | 13.77<br>(12.93 to 14.67) |
| Barbados                           | 10.09<br>(8.2 to 12.4)    | 10.15<br>(8.22 to 12.48)  | 10.24<br>(8.27 to 12.62)  | 10.32<br>(8.31 to 12.68)  | 10.49<br>(8.48 to 12.86)  | 10.38<br>(8.45 to 12.7)   | 10.48<br>(8.5 to 12.82)   | 10.58<br>(8.63 to 12.95)  | 10.5<br>(8.47 to 12.83)   | 10.39<br>(8.36 to 12.69)  |
| Belize                             | 13                        |                           |                           |                           |                           |                           |                           |                           |                           |                           |

Appendix Table 17C. Stillbirth rates (per 1,000 live births) by location, 1996-2005

|                                               | 1996                      | 1997                      | 1998                      | 1999                      | 2000                      | 2001                      | 2002                      | 2003                      | 2004                      | 2005                      |
|-----------------------------------------------|---------------------------|---------------------------|---------------------------|---------------------------|---------------------------|---------------------------|---------------------------|---------------------------|---------------------------|---------------------------|
| Guyana                                        | 18.42<br>(17.18 to 19.86) | 17.95<br>(16.73 to 19.35) | 17.6<br>(16.41 to 18.97)  | 17.27<br>(16.07 to 18.59) | 16.99<br>(15.81 to 18.28) | 16.8<br>(15.64 to 18.12)  | 16.64<br>(15.46 to 17.94) | 16.47<br>(15.32 to 17.77) | 16.37<br>(15.2 to 17.63)  | 16.21<br>(15.01 to 17.42) |
| Haiti                                         | 37.43<br>(30.76 to 45.94) | 36.81<br>(30.19 to 45.17) | 36.09<br>(29.46 to 44.26) | 34.88<br>(28.42 to 42.6)  | 33.39<br>(27.28 to 40.74) | 32.38<br>(26.47 to 39.64) | 31.88<br>(25.8 to 39.14)  | 31.63<br>(25.71 to 38.89) | 31.57<br>(25.47 to 38.52) | 31.55<br>(25.39 to 38.5)  |
| Jamaica                                       | 16.25<br>(14.99 to 17.56) | 16.05<br>(14.93 to 17.21) | 15.9<br>(14.89 to 17)     | 15.76<br>(14.8 to 16.77)  | 15.63<br>(14.74 to 16.57) | 15.44<br>(14.67 to 16.28) | 15.2<br>(14.57 to 15.92)  | 14.91<br>(14.33 to 15.51) | 14.72<br>(14.24 to 15.22) | 14.45<br>(14 to 14.9)     |
| Puerto Rico                                   | 9.63<br>(9.23 to 10.07)   | 9.19<br>(8.8 to 9.6)      | 8.81<br>(8.42 to 9.21)    | 8.57<br>(8.19 to 8.95)    | 8.26<br>(7.9 to 8.62)     | 8.01<br>(7.66 to 8.37)    | 7.77<br>(7.44 to 8.12)    | 7.53<br>(7.2 to 7.87)     | 7.39<br>(7.06 to 7.72)    | 7.24<br>(6.92 to 7.57)    |
| Saint Lucia                                   | 13.08<br>(12.03 to 14.19) | 13<br>(12.03 to 14.04)    | 13<br>(12.08 to 14)       | 13.17<br>(12.25 to 14.17) | 13.41<br>(12.51 to 14.42) | 13.72<br>(12.73 to 14.74) | 14.06<br>(13.03 to 15.1)  | 14.37<br>(13.32 to 15.43) | 14.64<br>(13.54 to 15.77) | 14.95<br>(13.79 to 16.2)  |
| Saint Vincent and the Grenadines              | 9.33<br>(7.71 to 11.18)   | 9.41<br>(7.93 to 11.13)   | 9.57<br>(8.22 to 11.16)   | 9.79<br>(8.48 to 11.3)    | 10.07<br>(8.83 to 11.52)  | 10.3<br>(9.13 to 11.66)   | 10.57<br>(9.46 to 11.8)   | 10.81<br>(9.82 to 11.9)   | 11.08<br>(10.17 to 12.03) | 11.33<br>(10.55 to 12.13) |
| Suriname                                      | 20.09<br>(17.77 to 22.75) | 19.97<br>(17.76 to 22.45) | 19.84<br>(17.68 to 22.08) | 19.78<br>(17.74 to 21.91) | 19.68<br>(17.8 to 21.7)   | 19.58<br>(17.74 to 21.53) | 19.4<br>(17.6 to 21.15)   | 19.13<br>(17.51 to 20.84) | 18.84<br>(17.2 to 20.57)  | 18.5<br>(16.89 to 20.17)  |
| Trinidad and Tobago                           | 13.7<br>(12.67 to 14.84)  | 13.82<br>(12.77 to 14.93) | 13.91<br>(12.89 to 15.04) | 14.31<br>(13.28 to 15.5)  | 14.4<br>(13.28 to 15.61)  | 14.4<br>(13.24 to 15.65)  | 14.46<br>(13.22 to 15.81) | 14.24<br>(12.98 to 15.61) | 13.95<br>(12.66 to 15.32) | 13.69<br>(12.4 to 15.09)  |
| Virgin Islands, U.S.                          | 8.84<br>(7.18 to 10.86)   | 8.67<br>(7.02 to 10.66)   | 8.53<br>(6.89 to 10.52)   | 8.41<br>(6.77 to 10.33)   | 8.21<br>(6.64 to 10.06)   | 8<br>(6.51 to 9.78)       | 7.84<br>(6.36 to 9.59)    | 7.75<br>(6.33 to 9.5)     | 7.66<br>(6.18 to 9.35)    | 7.5<br>(6.04 to 9.15)     |
| <b>Tropical Latin America</b>                 | 10.7<br>(9.51 to 11.95)   | 10.23<br>(9.22 to 11.3)   | 9.83<br>(9.01 to 10.71)   | 9.45<br>(8.77 to 10.19)   | 9.01<br>(8.48 to 9.59)    | 8.59<br>(8.19 to 9.02)    | 8.19<br>(7.91 to 8.5)     | 7.81<br>(7.61 to 8.04)    | 7.42<br>(7.26 to 7.59)    | 7.05<br>(6.92 to 7.18)    |
| Brazil                                        | 10.67<br>(9.53 to 11.86)  | 10.19<br>(9.25 to 11.2)   | 9.78<br>(8.99 to 10.61)   | 9.39<br>(8.74 to 10.07)   | 8.94<br>(8.46 to 9.46)    | 8.51<br>(8.15 to 8.89)    | 8.1<br>(7.86 to 8.37)     | 7.72<br>(7.55 to 7.91)    | 7.33<br>(7.19 to 7.47)    | 6.97<br>(6.83 to 7.11)    |
| Paraguay                                      | 11.35<br>(8.88 to 14.27)  | 11.19<br>(8.87 to 13.89)  | 11.05<br>(8.87 to 13.55)  | 10.91<br>(8.86 to 13.18)  | 10.78<br>(8.79 to 12.94)  | 10.62<br>(8.81 to 12.73)  | 10.35<br>(8.69 to 12.19)  | 9.99<br>(8.49 to 11.71)   | 9.57<br>(8.19 to 11.16)   | 9.04<br>(7.74 to 10.56)   |
| <b>Southeast Asia, East Asia, and Oceania</b> | 13.35<br>(12.62 to 14.14) | 13<br>(12.31 to 13.76)    | 12.68<br>(12.02 to 13.4)  | 12.37<br>(11.73 to 13.04) | 12.02<br>(11.42 to 12.66) | 11.7<br>(11.13 to 12.32)  | 11.39<br>(10.84 to 11.98) | 11.08<br>(10.56 to 11.65) | 10.86<br>(10.35 to 11.42) | 10.63<br>(10.15 to 11.18) |
| <b>East Asia</b>                              | 12.27<br>(11.25 to 13.39) | 11.98<br>(11 to 13.06)    | 11.7<br>(10.76 to 12.72)  | 11.41<br>(10.5 to 12.37)  | 11.1<br>(10.23 to 12.01)  | 10.8<br>(9.95 to 11.67)   | 10.49<br>(9.67 to 11.33)  | 10.17<br>(9.4 to 10.99)   | 10.05<br>(9.29 to 10.84)  | 9.87<br>(9.13 to 10.65)   |
| China                                         | 12.51<br>(11.47 to 13.69) | 12.19<br>(11.17 to 13.31) | 11.9<br>(10.91 to 12.96)  | 11.6<br>(10.65 to 12.61)  | 11.27<br>(10.35 to 12.21) | 10.94<br>(10.05 to 11.84) | 10.62<br>(9.77 to 11.49)  | 10.29<br>(9.48 to 11.13)  | 10.17<br>(9.4 to 11)      | 9.99<br>(9.22 to 10.81)   |
| North Korea                                   | 9.29<br>(8.07 to 10.72)   | 9.42<br>(8.16 to 10.87)   | 9.53<br>(8.24 to 11.01)   | 9.58<br>(8.27 to 11.04)   | 9.58<br>(8.3 to 11.04)    | 9.55<br>(8.3 to 10.97)    | 9.43<br>(8.18 to 10.84)   | 9.25<br>(8.05 to 10.63)   | 8.96<br>(7.75 to 10.29)   | 8.64<br>(7.45 to 9.91)    |
| Taiwan (Province of China)                    | 6.46<br>(6.11 to 6.84)    | 6.49<br>(6.15 to 6.86)    | 6.48<br>(6.14 to 6.86)    | 6.38<br>(6.04 to 6.76)    | 6.3<br>(5.95 to 6.68)     | 6.2<br>(5.87 to 6.57)     | 6.02<br>(5.71 to 6.39)    | 5.7<br>(5.39 to 6.05)     | 5.71<br>(5.41 to 6.07)    | 5.58<br>(5.28 to 5.92)    |
| <b>Southeast Asia</b>                         | 14.64<br>(14.26 to 15.08) | 14.15<br>(13.79 to 14.56) | 13.7<br>(13.35 to 14.1)   | 13.29<br>(12.94 to 13.67) | 12.86<br>(12.53 to 13.23) | 12.48<br>(12.14 to 12.84) | 12.12<br>(11.8 to 12.48)  | 11.78<br>(11.46 to 12.12) | 11.42<br>(11.11 to 11.75) | 11.12<br>(10.81 to 11.43) |
| Cambodia                                      | 29.18<br>(28.39 to 30.06) | 28.59<br>(27.82 to 29.45) | 27.85<br>(27.09 to 28.68) | 26.85<br>(26.1 to 27.64)  | 25.67<br>(24.95 to 26.43) | 24.32<br>(23.65 to 25.06) | 22.86<br>(22.21 to 23.55) | 21.43<br>(20.83 to 22.08) | 20.08<br>(19.51 to 20.68) | 18.8<br>(18.25 to 19.35)  |
| Indonesia                                     | 17.1<br>(16.67 to 17.58)  | 16.35<br>(15.94 to 16.81) | 15.8<br>(15.41 to 16.24)  | 15.26<br>(14.87 to 15.68) | 14.69<br>(14.31 to 15.09) | 14.2<br>(13.84 to 14.6)   | 13.78<br>(13.42 to 14.17) | 13.39<br>(13.04 to 13.77) | 12.97<br>(12.62 to 13.33) | 12.55<br>(12.2 to 12.89)  |
| Laos                                          | 40.47<br>(39.83 to 41.16) | 39.17<br>(38.54 to 39.85) | 37.89<br>(37.26 to 38.55) | 36.55<br>(35.94 to 37.17) | 35.23<br>(34.66 to 35.82) | 33.92<br>(33.38 to 34.5)  | 32.63<br>(32.1 to 33.18)  | 31.36<br>(30.87 to 31.89) | 30.03<br>(29.55 to 30.54) | 28.74<br>(28.26 to 29.21) |
| Malaysia                                      | 4.38<br>(4.12 to 4.66)    | 4.45<br>(4.21 to 4.7)     | 4.32<br>(4.1 to 4.54)     | 4.43<br>(4.23 to 4.65)    | 4.1<br>(3.92 to 4.28)     | 3.99<br>(3.82 to 4.15)    | 4.04<br>(3.88 to 4.19)    | 4.13<br>(3.97 to 4.28)    | 4.16<br>(4.01 to 4.3)     | 4.21<br>(4.07 to 4.35)    |
| Maldives                                      | 18.77<br>(16.52 to 21.22) | 16.85<br>(14.98 to 18.83) | 15.18<br>(13.61 to 16.8)  | 13.78<br>(12.48 to 15.11) | 12.6<br>(11.51 to 13.72)  | 11.71<br>(10.75 to 12.7)  | 11.04<br>(10.18 to 11.92) | 10.36<br>(9.64 to 11.14)  | 9.63<br>(8.99 to 10.32)   | 9.09<br>(8.5 to 9.7)      |
| Mauritius                                     | 13.12<br>(12.45 to 13.83) | 12.8<br>(12.16 to 13.48)  | 12.37<br>(11.72 to 13.02) | 11.89<br>(11.28 to 12.49) | 11.36<br>(10.78 to 11.94) | 10.84<br>(10.28 to 11.39) | 10.41<br>(9.91 to 10.95)  | 10.05<br>(9.57 to 10.55)  | 9.76<br>(9.29 to 10.25)   | 9.56<br>(9.11 to 10.03)   |
| Myanmar                                       | 20.23<br>(19.99 to 20.49) | 19.77<br>(19.54 to 20.03) | 19.23<br>(19 to 19.48)    | 18.7<br>(18.47 to 18.94)  | 18.1<br>(17.88 to 18.33)  | 17.51<br>(17.29 to 17.74) | 16.86<br>(16.65 to 17.08) | 16.16<br>(15.96 to 16.38) | 15.42<br>(15.22 to 15.62) | 14.74<br>(14.55 to 14.93) |
| Philippines                                   | 10.1<br>(9.94 to 10.26)   | 9.82<br>(9.67 to 9.98)    | 9.6<br>(9.45 to 9.75)     | 9.47<br>(9.32 to 9.62)    | 9.33<br>(9.19 to 9.49)    | 9.2<br>(9.06 to 9.36)     | 9.12<br>(8.97 to 9.27)    | 9.04<br>(8.9 to 9.19)     | 8.97<br>(8.82 to 9.11)    | 8.87<br>(8.73 to 9.01)    |
| Sri Lanka                                     | 8.02<br>(7.69 to 8.35)    | 8.13<br>(7.78 to 8.45)    | 7.11<br>(6.82 to 7.39)    | 6.67<br>(6.41 to 6.95)    | 6.66<br>(6.4 to 6.94)     | 6.36<br>(6.11 to 6.62)    | 5.88<br>(5.64 to 6.11)    | 5.56<br>(5.34 to 5.79)    | 5.73<br>(5.5 to 5.97)     | 7.17<br>(6.89 to 7.47)    |
| Seychelles                                    | 8.13<br>(7.48 to 8.79)    | 7.96<br>(7.32 to 8.6)     | 7.75<br>(7.15 to 8.37)    | 7.4<br>(7.15 to 8.35)     | 7.74<br>(7.18 to 8.34)    | 7.78<br>(7.22 to 8.36)    | 7.81<br>(7.23 to 8.37)    | 7.81<br>(7.24 to 8.4)     | 7.77<br>(7.2 to 8.38)     | 7.67<br>(7.12 to 8.26)    |
| Thailand                                      | 6.89<br>(6.2 to 7.71)     | 6.56<br>(5.91 to 7.29)    | 6.28<br>(5.65 to 6.97)    | 6<br>(5.42 to 6.66)       | 5.7<br>(5.15 to 6.3)      | 5.46<br>(4.94 to 5.99)    | 5.32<br>(4.8 to 5.84)     | 5.18<br>(4.68 to 5.68)    | 5.01<br>(4.54 to 5.46)    | 4.83<br>(4.38 to 5.28)    |
| Timor-Leste                                   | 29.87<br>(29.63 to 30.13) | 29.57<br>(29.33 to 29.83) | 28.82<br>(28.81 to 29.29) | 28.2<br>(28.58 to 29.06)  | 27.78<br>(27.55 to 28.01) | 26.13<br>(25.92 to 26.36) | 24.44<br>(24.24 to 24.66) | 23.6<br>(23.41 to 23.81)  | 22.48<br>(22.29 to 22.68) | 21.31<br>(21.12 to 21.49) |
| Vietnam                                       | 13.39<br>(12.67 to 14.22) | 12.89<br>(12.19 to 13.68) | 12.41<br>(11.74 to 13.17) | 11.97<br>(11.3 to 12.7)   | 11.55<br>(10.91 to 12.25) | 11.12<br>(10.51 to 11.82) | 10.68<br>(10.07 to 11.35) | 10.25<br>(9.68 to 10.89)  | 9.87<br>(9.3 to 10.47)    | 9.52<br>(8.96 to 10.09)   |
| <b>Oceania</b>                                | 29.38<br>(27.31 to 31.99) | 29.02<br>(26.61 to 31.61) | 28.75<br>(26.31 to 31.31) | 28.53<br>(26.12 to 31.14) | 28.4<br>(26.01 to 31.01)  | 28.36<br>(26.01 to 30.97) | 28.41<br>(26.08 to 31.06) | 28.44<br>(26.12 to 31.09) | 28.48<br>(26.17 to 31.06) | 28.39<br>(26.01 to 30.98) |
| American Samoa                                | 8.34<br>(7.65 to 9.09)    | 8.19<br>(7.5 to 8.94)     | 8.07<br>(7.38 to 8.81)    | 7.9<br>(7.22 to 8.63)     | 7.71<br>(7.05 to 8.43)    | 7.57<br>(6.93 to 8.27)    | 7.45<br>(6.83 to 8.16)    | 7.3<br>(6.69 to 7.98)     | 7.13<br>(6.54 to 7.78)    | 6.92<br>(6.33 to 7.56)    |
| Federated States of Micronesia                | 15.87<br>(14.56 to 17.3)  | 15.34<br>(14.04 to 16.74) | 14.82<br>(13.54 to 16.17) | 14.31<br>(13.08 to 15.63) | 13.79<br>(12.62 to 15.08) | 13.31<br>(12.18 to 14.55) | 12.83<br>(11.8 to 14.1)   | 12.38<br>(11.35 to 13.55) | 12.23<br>(11.21 to 13.36) | 12.03<br>(11.04 to 13.19) |
| Fiji                                          | 11.36<br>(11.06 to 11.7)  | 11.48<br>(11.18 to 11.82) | 11.57<br>(11.26 to 11.91) | 11.65<br>(11.33 to 11.99) | 11.78<br>(11.46 to 12.12) | 11.96<br>(11.65 to 12.32) | 12.15<br>(11.81 to 12.51) | 12.38<br>(12.04 to 12.75) | 12.61<br>(12.25 to 12.98) | 12.73<br>(12.37 to 13.09) |
| Guam                                          | 9.44<br>(9.11 to 9.79)    | 9.33<br>(9 to 9.67)       | 9.23<br>(8.9 to 9.56)     | 9.14<br>(8.83 to 9.46)    | 9.08<br>(8.77 to 9.4)     | 9.18<br>(8.87 to 9.5)     | 9.28<br>(8.98 to 9.59)    | 9.53<br>(9.22 to 9.85)    | 9.72<br>(9.4 to 10.04)    | 9.86<br>(9.55 to 10.19)   |
| Kiribati                                      | 26.74<br>(24.54 to 29.14) | 26.3<br>(24.06 to 28.69)  | 25.83<br>(23.59 to 28.17) | 25.3<br>(23.34 to 27.89)  | 25.3<br>(23.15 to 27.67)  | 25.18<br>(23.05 to 27.53) | 25.07<br>(22.98 to 27.45) | 25<br>(22.92 to 27.36)    | 24.95<br>(22.88 to 27.26) | 24.86<br>(22.73 to 27.16) |
| Marshall Islands                              | 14.24<br>(13.07 to 15.52) | 14.32<br>(13.11 to 15.63) | 14.4<br>(13.15 to 15.71)  | 14.46<br>(13.22 to 15.8)  | 14.46<br>(13.37 to 15.99) | 14.57<br>(13.33 to 15.93) | 14.43<br>(13.23 to 15.8)  | 14.23<br>(13.05 to 15.57) | 14.07<br>(12.91 to 15.38) | 13.92<br>(12.73 to 15.21) |
| Northern Mariana Islands                      | 5.11<br>(4.7 to 5.56)     | 5.02<br>(4.62 to 5.47)    | 4.91<br>(4.5 to 5.37)     | 4.57<br>(4.18 to 4.99)    | 4.27<br>(3.92 to 4.66)    | 4.06<br>(3.73 to 4.44)    | 3.77<br>(3.56 to 4.21)    | 3.8<br>(3.46 to 4.1)      | 3.8<br>(3.48 to 4.13)     | 3.68<br>(3.37 to 4.01)    |
| Papua New Guinea                              | 34.28<br>(31.46 to 37.36) | 33.74<br>(30.87 to 36.81) | 33.32<br>(30.44 to 36.35) | 32.97<br>(30.14 to 36.02) | 32.74<br>(29.95 to 35.81) | 32.65<br>(29.9 to 35.7)   | 32.65<br>(29.93 to 35.75) | 32.63<br>(29.92 to 35.71) | 32.61<br>(29.93 to 35.62) | 32.45<br>(29.67 to 35.45) |
| Samoa                                         | 9.31<br>(8.55 to 10.15)   | 8.98<br>(8.22 to 9.8)     | 8.53<br>(7.79 to 9.3)     | 8.48<br>(7.75 to 9.27)    | 8.34<br>(7.63 to 9.12)    | 8.16<br>(7.47 to 9.2)     | 7.97<br>(7.3 to 8.72)     | 7.86<br>(7.2 to 8.6)      | 7.76<br>(7.12 to 8.48)    | 7.68<br>(7.02 to 8.39)    |
| Solomon Islands                               | 18.35<br>(16.84 to 20)    | 18.12<br>(16.58 to 19.77) | 17.91<br>(16.36 to 19.54) | 17.71<br>(16.19 to 19.35) | 17.71<br>(16.19 to 19.35) | 17.72<br>(16.23 to 19.38) | 17.72<br>(16.33 to 19.5)  | 17.91<br>(16.42 to 19.6)  | 17.92<br>(16.45 to 19.58) | 17.9<br>(16.37 to 19.56)  |
| Tonga                                         | 12.36<br>(11.35 to 13.47) | 12.28<br>(11.23 to 13.39) | 12.19<br>(11.14 to 13.3)  | 12.13<br>(11.09 to 13.25) | 12.02<br>(11 to 13.15)    | 12<br>(10.99 to 13.12)    | 11.97<br>(10.97 to 13.11) | 11.97<br>(10.98 to 13.1)  | 11.96<br>(10.98 to 13.07) | 11.81<br>(10.8 to 12.9)   |
| Vanuatu                                       | 17.95<br>(16.48 to 19.57) | 17.94<br>(16.41 to 19.57) | 17.97<br>(16.42 to 19.6)  | 18.05<br>(16.5 to 19.72)  | 18.14<br>(16.59 to 19.84) | 18.25<br>(16.71 to 19.96) | 18.25<br>(16.95 to 20.25) | 18.25<br>(17.08 to 20.39) | 18.25<br>(17.17 to 20.44) | 18.25<br>(17.23 to 20.59) |
| <b>North Africa and Middle East</b>           | 18.84<br>(17.24 to 20.73) | 18.4<br>(16.87 to 20.23)  | 17.96<br>(16.53 to 19.73) | 17.54<br>(16.15 to 19.21) | 17.12<br>(15.75 to 18.65) | 16.78<br>(15.42 to 18.3)  | 16.4<br>(15.05 to 17.9)   | 15.99<br>(14.66 to 17.46) | 15.51<br>(14.2 to 16.95)  | 14.99<br>(13.7 to 16.39)  |
| <b>North Africa and Middle East</b>           | 18.84<br>(17.24 to 20.73) | 18.4<br>(16.87 to 20.23)  | 17.96<br>(16.53 to 19.73) | 17.54<br>(16.15 to 19.21) | 17.12<br>(15.75 to 18.65) | 16.78<br>(15.42 to 18.3)  | 16.4<br>(15.05 to 17.9)   | 15.99<br>(14.66 to 17.46) | 15.51<br>(14.2 to 16.95)  | 14.99<br>(13.7 to 16.39)  |
| Afghanistan                                   | 28.24<br>(24.38 to 32.99) | 27.9<br>(24.11 to 32.48)  | 27.48<br>(23.76 to 32)    | 27.07<br>(23.54 to 31     |                           |                           |                           |                           |                           |                           |

Appendix Table 17C. Stillbirth rates (per 1,000 live births) by location, 1996-2005

|                                    | 1996                      | 1997                      | 1998                      | 1999                      | 2000                      | 2001                      | 2002                      | 2003                      | 2004                      | 2005                      |
|------------------------------------|---------------------------|---------------------------|---------------------------|---------------------------|---------------------------|---------------------------|---------------------------|---------------------------|---------------------------|---------------------------|
| Lebanon                            | 12.29<br>(11.65 to 12.96) | 11.74<br>(11.15 to 12.38) | 11.27<br>(10.71 to 11.9)  | 10.87<br>(10.33 to 11.47) | 10.54<br>(10.04 to 11.1)  | 10.11<br>(9.67 to 10.62)  | 9.64<br>(9.21 to 10.12)   | 9.2<br>(8.82 to 9.63)     | 8.78<br>(8.42 to 9.16)    | 8.44<br>(8.13 to 8.77)    |
| Libya                              | 9.56<br>(8.23 to 11.21)   | 9.38<br>(8.06 to 11)      | 9.2<br>(7.88 to 10.79)    | 9.06<br>(7.74 to 10.58)   | 8.9<br>(7.62 to 10.39)    | 8.75<br>(7.49 to 10.23)   | 8.66<br>(7.36 to 10.15)   | 8.5<br>(7.25 to 9.97)     | 8.28<br>(7.03 to 9.67)    | 8.03<br>(6.8 to 9.37)     |
| Morocco                            | 20.41<br>(20.02 to 20.81) | 19.88<br>(19.51 to 20.26) | 19.33<br>(18.96 to 19.7)  | 18.79<br>(18.43 to 19.18) | 18.26<br>(17.9 to 18.66)  | 17.64<br>(17.27 to 18.03) | 16.99<br>(16.62 to 17.36) | 16.31<br>(15.95 to 16.67) | 15.63<br>(15.27 to 16)    | 14.99<br>(14.62 to 15.34) |
| Palestine                          | 6.56<br>(5.81 to 7.36)    | 6.47<br>(5.73 to 7.31)    | 6.41<br>(5.67 to 7.22)    | 6.32<br>(5.61 to 7.1)     | 6.22<br>(5.51 to 6.96)    | 6.22<br>(5.52 to 6.99)    | 6.34<br>(5.65 to 7.11)    | 6.45<br>(5.76 to 7.22)    | 6.56<br>(5.84 to 7.33)    | 6.59<br>(5.88 to 7.41)    |
| Oman                               | 17.22<br>(16.17 to 18.36) | 16.04<br>(15.04 to 17.02) | 14.86<br>(13.98 to 15.74) | 13.45<br>(12.7 to 14.21)  | 12.42<br>(11.73 to 13.13) | 11.28<br>(10.68 to 11.9)  | 10.21<br>(9.71 to 10.76)  | 9.35<br>(8.92 to 9.78)    | 8.74<br>(8.36 to 9.11)    | 7.59<br>(7.26 to 7.93)    |
| Qatar                              | 5.15<br>(4.7 to 5.63)     | 5.08<br>(4.62 to 5.56)    | 5.01<br>(4.54 to 5.46)    | 4.93<br>(4.49 to 5.4)     | 4.83<br>(4.39 to 5.35)    | 4.77<br>(4.32 to 5.28)    | 4.75<br>(4.3 to 5.26)     | 4.77<br>(4.31 to 5.25)    | 4.74<br>(4.29 to 5.24)    | 4.74<br>(4.28 to 5.27)    |
| Saudi Arabia                       | 15.67<br>(13.13 to 18.45) | 15.18<br>(12.93 to 17.58) | 14.7<br>(12.75 to 16.89)  | 14.2<br>(12.53 to 16.11)  | 13.8<br>(12.38 to 15.42)  | 13.55<br>(12.29 to 14.93) | 13.36<br>(12.25 to 14.61) | 13.05<br>(12.05 to 14.13) | 12.61<br>(11.71 to 13.53) | 12.09<br>(11.32 to 12.87) |
| Sudan                              | 28.64<br>(25.95 to 31.74) | 27.83<br>(25.19 to 30.83) | 27.01<br>(24.46 to 29.77) | 26.13<br>(23.69 to 28.81) | 25.19<br>(22.85 to 27.67) | 24.41<br>(22.1 to 26.72)  | 23.76<br>(21.54 to 26.03) | 23.1<br>(21 to 25.25)     | 22.51<br>(20.47 to 24.61) | 22.02<br>(20.08 to 24.03) |
| Syria                              | 9.38<br>(8.08 to 11.04)   | 8.88<br>(7.64 to 10.43)   | 8.35<br>(7.18 to 9.77)    | 7.83<br>(6.69 to 9.14)    | 7.3<br>(6.24 to 8.56)     | 6.87<br>(5.89 to 8.05)    | 6.55<br>(5.59 to 7.66)    | 6.39<br>(5.46 to 7.47)    | 6.39<br>(5.45 to 7.44)    | 6.48<br>(5.49 to 7.57)    |
| Tunisia                            | 9.88<br>(9.22 to 10.58)   | 9.66<br>(8.89 to 10.44)   | 9.39<br>(8.64 to 10.14)   | 9.07<br>(8.44 to 9.76)    | 8.74<br>(8.14 to 9.34)    | 8.25<br>(7.8 to 8.72)     | 7.89<br>(7.53 to 8.24)    | 7.89<br>(7.53 to 8.25)    | 7.99<br>(7.64 to 8.38)    | 7.94<br>(7.56 to 8.32)    |
| Turkey                             | 16.23<br>(13.97 to 19.03) | 15.65<br>(13.44 to 18.35) | 14.91<br>(12.76 to 17.47) | 14.19<br>(12.13 to 16.57) | 13.58<br>(11.63 to 15.85) | 13.32<br>(11.41 to 15.58) | 13.11<br>(11.14 to 15.37) | 12.85<br>(10.96 to 15.09) | 12.41<br>(10.53 to 14.49) | 11.81<br>(10.13 to 13.79) |
| United Arab Emirates               | 4.72<br>(4.36 to 5.11)    | 4.32<br>(4.01 to 4.66)    | 4.06<br>(3.78 to 4.38)    | 3.9<br>(3.63 to 4.19)     | 3.69<br>(3.44 to 3.95)    | 3.54<br>(3.3 to 3.79)     | 3.42<br>(3.2 to 3.63)     | 3.36<br>(3.16 to 3.57)    | 3.3<br>(3.11 to 3.5)      | 3.01<br>(2.82 to 3.21)    |
| Yemen                              | 30.35<br>(28.54 to 32.42) | 29.6<br>(27.83 to 31.61)  | 28.77<br>(27.05 to 30.71) | 27.89<br>(26.18 to 29.76) | 26.98<br>(25.33 to 28.76) | 26.09<br>(24.51 to 27.88) | 25.21<br>(23.63 to 26.94) | 24.31<br>(22.81 to 25.99) | 23.35<br>(21.87 to 24.93) | 22.27<br>(20.81 to 23.73) |
| <b>South Asia</b>                  | 36.42<br>(34.41 to 38.64) | 35.34<br>(33.44 to 37.44) | 34.3<br>(32.53 to 36.22)  | 33.28<br>(31.62 to 34.97) | 32.36<br>(30.81 to 33.97) | 31.5<br>(30.06 to 32.96)  | 30.75<br>(29.38 to 32.06) | 30.11<br>(28.86 to 31.29) | 29.43<br>(28.33 to 30.53) | 28.55<br>(27.53 to 29.6)  |
| <b>South Asia</b>                  | 36.42<br>(34.41 to 38.64) | 35.34<br>(33.44 to 37.44) | 34.3<br>(32.53 to 36.22)  | 33.28<br>(31.62 to 34.97) | 32.36<br>(30.81 to 33.97) | 31.5<br>(30.06 to 32.96)  | 30.75<br>(29.38 to 32.06) | 30.11<br>(28.86 to 31.29) | 29.43<br>(28.33 to 30.53) | 28.55<br>(27.53 to 29.6)  |
| Bangladesh                         | 39.89<br>(38.08 to 42.03) | 38.18<br>(36.51 to 40.09) | 36.58<br>(35.1 to 38.33)  | 35.05<br>(33.69 to 36.62) | 33.58<br>(32.34 to 34.96) | 32.19<br>(31.05 to 33.36) | 30.86<br>(29.77 to 31.92) | 29.61<br>(28.65 to 30.54) | 28.52<br>(27.64 to 29.39) | 27.52<br>(26.74 to 28.31) |
| Bhutan                             | 38.46<br>(37.23 to 39.79) | 36.71<br>(35.51 to 37.97) | 35.05<br>(33.9 to 36.28)  | 33.44<br>(32.33 to 34.59) | 31.84<br>(30.8 to 32.91)  | 30.29<br>(29.33 to 31.31) | 28.76<br>(27.83 to 29.72) | 27.29<br>(26.44 to 28.21) | 26.07<br>(25.21 to 26.94) | 25.02<br>(24.18 to 25.85) |
| India                              | 34.87<br>(32.67 to 37.36) | 33.85<br>(31.73 to 36.16) | 32.87<br>(30.83 to 35.05) | 31.88<br>(29.94 to 33.85) | 31<br>(29.22 to 32.82)    | 30.17<br>(28.51 to 31.86) | 29.48<br>(27.9 to 31.02)  | 28.93<br>(27.46 to 30.36) | 28.26<br>(26.93 to 29.59) | 27.28<br>(26.09 to 28.51) |
| Nepal                              | 38.44<br>(36.7 to 40.41)  | 36.8<br>(35.19 to 38.55)  | 35.28<br>(33.77 to 36.9)  | 33.79<br>(32.39 to 35.2)  | 32.34<br>(31.08 to 33.61) | 30.94<br>(29.8 to 32.09)  | 29.72<br>(28.67 to 30.72) | 28.62<br>(27.67 to 29.52) | 27.82<br>(26.99 to 28.64) | 27.18<br>(26.45 to 27.92) |
| Pakistan                           | 43.01<br>(41.54 to 44.67) | 42.32<br>(40.87 to 43.92) | 41.61<br>(40.2 to 43.18)  | 41<br>(39.67 to 42.5)     | 40.46<br>(39.17 to 41.87) | 39.92<br>(38.64 to 41.24) | 39.29<br>(38.02 to 40.56) | 38.66<br>(37.37 to 39.87) | 38.15<br>(36.87 to 39.57) | 37.77<br>(36.55 to 38.99) |
| <b>Sub-Saharan Africa</b>          | 36.07<br>(34 to 38.48)    | 35.62<br>(33.57 to 37.99) | 35.18<br>(33.12 to 37.55) | 34.73<br>(32.71 to 37.13) | 34.25<br>(32.22 to 36.54) | 33.67<br>(31.63 to 36.01) | 33.02<br>(31.01 to 35.27) | 32.31<br>(30.32 to 34.49) | 31.43<br>(29.5 to 33.57)  | 30.54<br>(28.68 to 32.58) |
| <b>Southern Sub-Saharan Africa</b> | 16.27<br>(14.77 to 17.92) | 16.12<br>(14.63 to 17.74) | 15.99<br>(14.49 to 17.59) | 15.89<br>(14.41 to 17.45) | 15.83<br>(14.36 to 17.37) | 15.74<br>(14.31 to 17.25) | 15.74<br>(14.31 to 17.21) | 15.84<br>(14.43 to 17.36) | 16.05<br>(14.66 to 17.59) | 16.37<br>(14.96 to 17.95) |
| Botswana                           | 14.96<br>(12.55 to 17.98) | 14.67<br>(12.34 to 17.57) | 14.38<br>(12.08 to 17.19) | 14.1<br>(11.93 to 16.77)  | 13.84<br>(11.74 to 16.33) | 13.5<br>(11.43 to 15.9)   | 13.19<br>(11.18 to 15.49) | 12.79<br>(10.82 to 14.83) | 12.43<br>(10.53 to 14.42) | 11.89<br>(10.09 to 13.82) |
| Lesotho                            | 25.76<br>(23.6 to 28.15)  | 25.75<br>(23.56 to 28.23) | 25.82<br>(23.6 to 28.39)  | 25.93<br>(23.7 to 28.5)   | 25.83<br>(23.62 to 28.48) | 25.75<br>(23.53 to 28.41) | 25.66<br>(23.46 to 28.32) | 25.68<br>(23.49 to 28.26) | 25.86<br>(23.71 to 28.4)  | 25.83<br>(23.62 to 28.38) |
| Nambia                             | 13.67<br>(11.33 to 16.4)  | 13.22<br>(10.97 to 15.93) | 12.89<br>(10.62 to 15.64) | 12.6<br>(10.35 to 15.19)  | 12.31<br>(10.16 to 14.89) | 12.01<br>(9.95 to 14.52)  | 11.75<br>(9.73 to 14.1)   | 11.81<br>(9.75 to 14.17)  | 12.07<br>(9.97 to 14.46)  | 12.11<br>(9.95 to 14.52)  |
| South Africa                       | 14.2<br>(13 to 15.48)     | 13.9<br>(12.77 to 15.05)  | 13.62<br>(12.55 to 14.68) | 13.31<br>(12.29 to 14.3)  | 13.05<br>(12.11 to 14)    | 12.71<br>(11.83 to 13.61) | 12.38<br>(11.53 to 13.27) | 12.17<br>(11.33 to 13.02) | 12.05<br>(11.25 to 12.9)  | 12.09<br>(11.28 to 12.94) |
| Swaziland                          | 11.81<br>(10.1 to 13.9)   | 11.83<br>(10.08 to 13.93) | 11.85<br>(10.04 to 13.84) | 11.85<br>(10.11 to 13.83) | 11.82<br>(10.12 to 13.72) | 11.78<br>(10.06 to 13.7)  | 11.74<br>(10.01 to 13.63) | 11.73<br>(10.02 to 13.53) | 11.65<br>(9.98 to 13.43)  | 11.9<br>(10.26 to 13.67)  |
| Zimbabwe                           | 21.14<br>(18 to 24.59)    | 21.37<br>(18.28 to 24.93) | 21.65<br>(18.42 to 25.19) | 22.06<br>(18.87 to 25.67) | 22.6<br>(19.33 to 26.23)  | 23.32<br>(19.99 to 26.96) | 24.18<br>(20.7 to 27.91)  | 25.12<br>(21.51 to 29.04) | 26.1<br>(22.3 to 30.22)   | 27.01<br>(23.15 to 31.33) |
| <b>Western Sub-Saharan Africa</b>  | 41.32<br>(37.57 to 45.74) | 41.04<br>(37.32 to 45.41) | 40.75<br>(36.99 to 45.11) | 40.56<br>(36.83 to 44.86) | 40.38<br>(36.66 to 44.6)  | 40.07<br>(36.32 to 44.24) | 39.64<br>(35.97 to 43.69) | 39.05<br>(35.45 to 42.96) | 38.17<br>(34.66 to 41.97) | 37.17<br>(33.84 to 40.85) |
| Benin                              | 27.44<br>(25.64 to 29.48) | 26.84<br>(25.12 to 28.74) | 26.27<br>(24.61 to 28.03) | 25.72<br>(24.17 to 27.36) | 25.18<br>(23.75 to 26.61) | 24.59<br>(23.27 to 25.9)  | 23.91<br>(22.73 to 25.1)  | 23.26<br>(22.17 to 24.31) | 22.6<br>(21.66 to 23.55)  | 21.97<br>(21.16 to 22.82) |
| Burkina Faso                       | 22.46<br>(21.16 to 25.06) | 22.46<br>(20.8 to 24.47)  | 21.95<br>(20.41 to 23.8)  | 21.44<br>(20.03 to 23.15) | 21.04<br>(19.7 to 22.6)   | 20.61<br>(19.34 to 22.04) | 20.14<br>(19.02 to 21.43) | 19.6<br>(18.55 to 20.77)  | 19.05<br>(18.09 to 20.06) | 18.47<br>(17.66 to 19.34) |
| Cameroon                           | 26.34<br>(24.65 to 28.21) | 26.21<br>(24.48 to 28.07) | 26.02<br>(24.25 to 27.89) | 25.75<br>(23.99 to 27.62) | 25.33<br>(23.6 to 27.19)  | 24.81<br>(23.12 to 26.61) | 24.26<br>(22.62 to 26)    | 23.69<br>(22.13 to 25.41) | 23.15<br>(21.62 to 24.83) | 22.67<br>(21.12 to 24.32) |
| Cape Verde                         | 14.33<br>(13.33 to 15.4)  | 14.57<br>(13.47 to 15.77) | 14.69<br>(13.51 to 15.98) | 14.63<br>(13.36 to 16.04) | 14.31<br>(12.96 to 15.83) | 13.92<br>(12.53 to 15.45) | 13.52<br>(12.06 to 15.16) | 13.09<br>(11.54 to 14.73) | 12.63<br>(11.06 to 14.3)  | 12.16<br>(10.59 to 13.88) |
| Chad                               | 44.83<br>(43.53 to 46.3)  | 44.45<br>(43.15 to 45.9)  | 44.01<br>(42.72 to 45.44) | 43.58<br>(42.27 to 44.97) | 43.24<br>(41.94 to 44.61) | 42.7<br>(41.43 to 44.08)  | 42.3<br>(40.99 to 43.68)  | 41.7<br>(40.45 to 43.07)  | 41.36<br>(39.12 to 41.66) | 40.91<br>(37.66 to 40.14) |
| Cote d'Ivoire                      | 31.61<br>(30.9 to 32.4)   | 31.14<br>(30.44 to 31.92) | 30.64<br>(29.94 to 31.39) | 30.11<br>(29.41 to 30.84) | 29.56<br>(28.88 to 30.28) | 28.93<br>(28.27 to 29.66) | 28.36<br>(27.69 to 29.07) | 27.84<br>(27.19 to 28.55) | 27.32<br>(26.66 to 27.99) | 26.78<br>(26.12 to 27.43) |
| The Gambia                         | 36.22<br>(35.19 to 37.38) | 35.55<br>(34.53 to 36.68) | 34.86<br>(33.85 to 35.95) | 34.07<br>(33.07 to 35.13) | 33.18<br>(32.21 to 34.21) | 32.22<br>(31.29 to 33.26) | 31.42<br>(30.47 to 32.43) | 30.56<br>(29.66 to 31.55) | 29.63<br>(28.73 to 30.57) | 28.77<br>(27.87 to 29.66) |
| Ghana                              | 23.37<br>(22.06 to 24.81) | 23.4<br>(22.1 to 24.82)   | 23.52<br>(22.22 to 24.87) | 23.52<br>(22.28 to 24.91) | 23.49<br>(22.2 to 24.85)  | 23.49<br>(22.22 to 24.84) | 23.49<br>(22.05 to 24.66) | 23.49<br>(21.85 to 24.51) | 23.49<br>(21.52 to 24.3)  | 23.49<br>(21.19 to 24.11) |
| Guinea                             | 30.72<br>(29.76 to 31.81) | 29.95<br>(29.01 to 31)    | 29.19<br>(28.26 to 30.2)  | 28.44<br>(27.52 to 29.42) | 27.7<br>(26.8 to 28.65)   | 26.94<br>(26.08 to 27.89) | 26.17<br>(25.3 to 27.1)   | 25.46<br>(24.63 to 26.37) | 24.77<br>(23.94 to 25.64) | 24.12<br>(23.29 to 24.94) |
| Guinea-Bissau                      | 44.99<br>(42.04 to 48.18) | 43.91<br>(40.95 to 47.02) | 43.46<br>(40.5 to 46.55)  | 42.6<br>(39.68 to 45.7)   | 41.44<br>(38.62 to 44.46) | 40.11<br>(37.42 to 43.1)  | 38.78<br>(36.2 to 41.67)  | 37.47<br>(34.99 to 40.25) | 36.07<br>(33.67 to 38.71) | 34.68<br>(32.32 to 37.21) |
| Liberia                            | 41<br>(38.32 to 43.91)    | 40.13<br>(37.42 to 42.97) | 38.81<br>(36.17 to 41.58) | 36.98<br>(34.45 to 39.67) | 34.44<br>(32.1 to 36.95)  | 31.91<br>(29.77 to 34.28) | 29.45<br>(27.49 to 31.65) | 27.93<br>(26.09 to 30)    | 26.57<br>(24.81 to 28.52) | 25.3<br>(23.57 to 27.15)  |
| Mali                               | 49.1<br>(45.94 to 52.58)  | 48.3<br>(45.11 to 51.72)  | 47.5<br>(44.28 to 50.92)  | 46.58<br>(43.39 to 49.97) | 45.62<br>(42.5 to 48.98)  | 44.21<br>(41.19 to 47.41) | 42.9<br>(40 to 45.99)     | 41.58<br>(38.84 to 44.6)  | 40.45<br>(37.79 to 43.4)  | 39.29<br>(36.61 to 42.15) |
| Mauritania                         | 27<br>(26.34 to 27.72)    | 26.74<br>(26.09 to 27.46) | 26.47<br>(25.83 to 27.18) | 26.11<br>(25.46 to 26.8)  | 25.71<br>(25.07 to 26.38) | 25.26<br>(24.64 to 25.94) | 24.81<br>(24.18 to 25.48) | 24.31<br>(23.72 to 24.99) | 23.81<br>(23.2 to 24.44)  | 23.24<br>(22.62 to 23.84) |
| Niger                              | 41.06<br>(39.64 to 42.49) | 40.1<br>(38.74 to 41.52)  | 38.93<br>(37.63 to 40.31) | 37.71<br>(36.42 to 39.03) | 36.39<br>(35.15 to 37.63) | 34.94<br>(33.76 to 36.14) | 33.51<br>(32.41 to 34.66) | 32.12<br>(31.08 to 33.2)  | 30.8<br>(29.81 to 31.83)  | 29.59<br>(28.64 to 30.6)  |
| Nigeria                            | 50.54<br>(44.18 to 58.12) | 50.35<br>(43.96 to 57.93) | 50.21<br>(43.94 to 57.56) | 50.34<br>(44.57 to 57.58) | 50.62<br>(44.41 to 58.05) | 50.79<br>(44.61 to 57.82) | 50.73<br>(44.59 to 57.73) | 50.33<br>(44.33 to 56.91) | 49.33<br>(43.47 to 55.58) | 48.12<br>(42.55 to 54.38) |
| Sao Tome and Principe              | 16.57<br>(15.48 to 17.74) | 16.43<br>(15.32 to 17.59) | 16.21<br>(15.1 to 17.36)  | 15.91<br>(14.82 to 17.07) | 15.48<br>(14.43 to 16.61) | 14.95<br>(13.94 to 16.06) | 14.42<br>(13.46 to 15.5)  | 13.93<br>(13.01 to 14.97) | 13.48<br>(12.58 to 14.47) | 13.03<br>(12.14 to 13.98) |
| Senegal                            | 25.67<br>(20.97 to 31.44) | 25.73<br>(21.1 to 31.32)  | 25.69<br>(21.19 to 30.76) | 25.58<br>(21.27 to 30.47) |                           |                           |                           |                           |                           |                           |

Appendix Table 17C. Stillbirth rates (per 1,000 live births) by location, 1996-2005

|                                   | 1996                      | 1997                      | 1998                      | 1999                      | 2000                      | 2001                      | 2002                      | 2003                      | 2004                      | 2005                      |
|-----------------------------------|---------------------------|---------------------------|---------------------------|---------------------------|---------------------------|---------------------------|---------------------------|---------------------------|---------------------------|---------------------------|
| Kenya                             | 32.72<br>(30.81 to 34.87) | 32.57<br>(30.64 to 34.73) | 32.27<br>(30.39 to 34.37) | 31.83<br>(29.99 to 33.87) | 31.36<br>(29.56 to 33.38) | 30.7<br>(28.95 to 32.62)  | 29.96<br>(28.25 to 31.78) | 29.16<br>(27.51 to 30.89) | 28.3<br>(26.72 to 29.93)  | 27.32<br>(25.8 to 28.94)  |
| Madagascar                        | 31.02<br>(29.43 to 32.84) | 30.15<br>(28.6 to 31.9)   | 29.32<br>(27.81 to 31.01) | 28.56<br>(27.05 to 30.19) | 27.89<br>(26.42 to 29.48) | 27.19<br>(25.77 to 28.78) | 26.65<br>(25.2 to 28.21)  | 25.89<br>(24.52 to 27.43) | 25.03<br>(23.66 to 26.48) | 24.15<br>(22.79 to 25.52) |
| Malawi                            | 31.31<br>(30.63 to 32.06) | 30.45<br>(29.79 to 31.18) | 29.63<br>(28.98 to 30.33) | 28.66<br>(28.02 to 29.33) | 27.57<br>(26.96 to 28.21) | 26.41<br>(25.83 to 27.05) | 25.12<br>(24.54 to 25.72) | 23.86<br>(23.33 to 24.45) | 22.72<br>(22.2 to 23.26)  | 21.9<br>(21.38 to 22.41)  |
| Mozambique                        | 45.57<br>(43.26 to 48.28) | 43.86<br>(41.62 to 46.45) | 42.06<br>(39.89 to 44.5)  | 40.38<br>(38.24 to 42.67) | 38.78<br>(36.75 to 41.04) | 37.1<br>(35.16 to 39.24)  | 35.33<br>(33.44 to 37.34) | 33.58<br>(31.8 to 35.5)   | 31.82<br>(30.11 to 33.6)  | 30.18<br>(28.48 to 31.89) |
| Rwanda                            | 30.42<br>(27.99 to 33.25) | 29.77<br>(27.42 to 32.39) | 28.99<br>(26.68 to 31.52) | 28.05<br>(25.86 to 30.48) | 26.85<br>(24.79 to 29.1)  | 25.54<br>(23.58 to 27.51) | 24.12<br>(22.26 to 25.96) | 22.78<br>(21.04 to 24.5)  | 21.31<br>(19.73 to 22.85) | 20<br>(18.56 to 21.47)    |
| Somalia                           | 39.68<br>(37.67 to 42.04) | 39.13<br>(37.14 to 41.44) | 38.54<br>(36.55 to 40.77) | 37.81<br>(35.81 to 39.96) | 37<br>(35.06 to 39.16)    | 36.08<br>(34.19 to 38.16) | 35.03<br>(33.16 to 37.03) | 33.86<br>(32.06 to 35.79) | 32.53<br>(30.78 to 34.34) | 31.23<br>(29.48 to 33.01) |
| South Sudan                       | 65.45<br>(64.1 to 66.95)  | 64<br>(62.68 to 65.45)    | 62.47<br>(61.18 to 63.88) | 60.94<br>(59.64 to 62.29) | 59.36<br>(58.1 to 60.68)  | 57.82<br>(56.61 to 59.15) | 56.33<br>(55.11 to 57.63) | 54.92<br>(53.75 to 56.19) | 53.5<br>(52.32 to 54.71)  | 52.14<br>(50.96 to 53.3)  |
| Tanzania                          | 28.3<br>(27.56 to 29.13)  | 27.71<br>(26.99 to 28.52) | 27.07<br>(26.35 to 27.85) | 26.37<br>(25.65 to 27.12) | 25.62<br>(24.93 to 26.36) | 24.86<br>(24.2 to 25.59)  | 24.04<br>(23.37 to 24.74) | 23.21<br>(22.57 to 23.89) | 22.4<br>(21.77 to 23.05)  | 21.66<br>(21.04 to 22.28) |
| Uganda                            | 28.33<br>(28.04 to 28.65) | 27.82<br>(27.54 to 28.13) | 27.29<br>(27.01 to 27.59) | 26.73<br>(26.45 to 27.02) | 26.17<br>(25.9 to 26.45)  | 25.57<br>(25.31 to 25.86) | 24.92<br>(24.66 to 25.2)  | 24.29<br>(24.04 to 24.57) | 23.62<br>(23.36 to 23.88) | 22.93<br>(22.67 to 23.18) |
| Zambia                            | 30.83<br>(29.27 to 32.67) | 30.2<br>(28.67 to 31.99)  | 29.71<br>(28.18 to 31.43) | 29.22<br>(27.67 to 30.88) | 28.54<br>(27.05 to 30.21) | 27.66<br>(26.21 to 29.25) | 26.58<br>(25.16 to 28.09) | 25.51<br>(24.16 to 26.97) | 24.47<br>(23.15 to 25.83) | 23.5<br>(22.18 to 24.84)  |
| <b>Central Sub-Saharan Africa</b> | 39.29<br>(38.11 to 40.53) | 38.83<br>(37.7 to 40.06)  | 38.35<br>(37.25 to 39.56) | 37.73<br>(36.62 to 38.92) | 37.02<br>(36 to 38.19)    | 36.25<br>(35.22 to 37.31) | 35.4<br>(34.42 to 36.42)  | 34.46<br>(33.53 to 35.48) | 33.36<br>(32.46 to 34.34) | 32.29<br>(31.43 to 33.23) |
| Angola                            | 43.24<br>(41.23 to 45.29) | 42.28<br>(40.36 to 44.34) | 41.33<br>(39.48 to 43.32) | 40.6<br>(38.74 to 42.54)  | 39.89<br>(38.07 to 41.73) | 38.85<br>(37.08 to 40.66) | 37.5<br>(35.85 to 39.24)  | 36.01<br>(34.43 to 37.64) | 34.43<br>(32.94 to 35.98) | 32.82<br>(31.41 to 34.34) |
| Central African Republic          | 53.58<br>(50.29 to 57.12) | 53.27<br>(49.98 to 56.97) | 52.83<br>(49.49 to 56.54) | 52.24<br>(48.95 to 55.83) | 51.75<br>(48.37 to 55.27) | 51.23<br>(47.94 to 54.72) | 50.82<br>(47.56 to 54.35) | 50.51<br>(47.31 to 53.89) | 49.98<br>(46.91 to 53.33) | 49.53<br>(46.37 to 52.89) |
| Congo                             | 25.96<br>(24.37 to 27.67) | 26.11<br>(24.47 to 27.83) | 26.35<br>(24.67 to 28.1)  | 26.55<br>(24.85 to 28.35) | 26.48<br>(24.8 to 28.28)  | 26.23<br>(24.59 to 28.05) | 25.77<br>(24.17 to 27.56) | 25.2<br>(23.64 to 26.94)  | 24.45<br>(22.93 to 26.12) | 23.61<br>(22.1 to 25.21)  |
| Democratic Republic of the Congo  | 37.84<br>(37.11 to 38.66) | 37.55<br>(36.83 to 38.36) | 37.24<br>(36.51 to 38.04) | 36.62<br>(35.89 to 37.4)  | 35.87<br>(35.16 to 36.63) | 35.17<br>(34.48 to 35.93) | 34.45<br>(33.75 to 35.2)  | 33.66<br>(32.98 to 34.39) | 32.67<br>(31.99 to 33.36) | 31.74<br>(31.06 to 32.39) |
| Equatorial Guinea                 | 51.87<br>(48.68 to 55.29) | 46.64<br>(43.76 to 49.87) | 43.56<br>(40.8 to 46.62)  | 41.12<br>(38.54 to 43.95) | 38.49<br>(35.98 to 41.11) | 35.31<br>(33.04 to 37.71) | 33.08<br>(30.96 to 35.37) | 31.81<br>(29.79 to 33.93) | 30.54<br>(28.66 to 32.58) | 29.73<br>(27.84 to 31.75) |
| Gabon                             | 24.67<br>(23.16 to 26.3)  | 24.25<br>(22.73 to 25.85) | 23.93<br>(22.41 to 25.52) | 23.74<br>(22.22 to 25.35) | 23.55<br>(22.06 to 25.15) | 23.37<br>(21.9 to 24.99)  | 23.17<br>(21.74 to 24.79) | 22.96<br>(21.54 to 24.55) | 22.68<br>(21.27 to 24.22) | 22.28<br>(20.86 to 23.8)  |

Appendix Table 17D. Stillbirth rates (per 1,000 live births) by location, 2006-2016

|                                  | 2006                      | 2007                      | 2008                      | 2009                      | 2010                      | 2011                      | 2012                      | 2013                      | 2014                      | 2015                      | 2016                      |
|----------------------------------|---------------------------|---------------------------|---------------------------|---------------------------|---------------------------|---------------------------|---------------------------|---------------------------|---------------------------|---------------------------|---------------------------|
| <b>Global</b>                    | 18.7<br>(17.86 to 19.63)  | 18.1<br>(17.29 to 19)     | 17.54<br>(16.77 to 18.41) | 17.01<br>(16.29 to 17.83) | 16.47<br>(15.76 to 17.25) | 15.89<br>(15.19 to 16.66) | 15.34<br>(14.69 to 16.09) | 14.8<br>(14.17 to 15.54)  | 14.26<br>(13.64 to 15.01) | 13.72<br>(13.1 to 14.46)  | 13.15<br>(12.53 to 13.87) |
| <b>High SDI</b>                  | 3.02<br>(2.95 to 3.09)    | 2.99<br>(2.92 to 3.06)    | 2.95<br>(2.88 to 3.02)    | 2.9<br>(2.82 to 2.97)     | 2.8<br>(2.76 to 2.92)     | 2.8<br>(2.72 to 2.89)     | 2.81<br>(2.72 to 2.91)    | 2.76<br>(2.66 to 2.88)    | 2.71<br>(2.6 to 2.84)     | 2.68<br>(2.56 to 2.82)    | 2.63<br>(2.5 to 2.79)     |
| <b>High-middle SDI</b>           | 9.04<br>(8.65 to 9.44)    | 8.7<br>(8.34 to 9.09)     | 8.41<br>(8.06 to 8.77)    | 8.15<br>(7.81 to 8.5)     | 7.9<br>(7.57 to 8.24)     | 7.63<br>(7.3 to 7.97)     | 7.4<br>(7.05 to 7.75)     | 7.19<br>(6.83 to 7.57)    | 6.97<br>(6.59 to 7.38)    | 6.75<br>(6.36 to 7.19)    | 6.5<br>(6.09 to 6.96)     |
| <b>Middle SDI</b>                | 13.43<br>(12.84 to 14.13) | 12.94<br>(12.38 to 13.59) | 12.47<br>(11.92 to 13.09) | 11.99<br>(11.45 to 12.59) | 11.53<br>(11 to 12.11)    | 11.07<br>(10.56 to 11.63) | 10.64<br>(10.17 to 11.19) | 10.27<br>(9.83 to 10.82)  | 9.92<br>(9.5 to 10.45)    | 9.58<br>(9.16 to 10.1)    | 9.2<br>(8.79 to 9.71)     |
| <b>Low-middle SDI</b>            | 30.36<br>(28.74 to 32.07) | 29.37<br>(27.86 to 31)    | 28.41<br>(26.97 to 29.99) | 27.44<br>(26.07 to 28.96) | 26.42<br>(25.08 to 27.86) | 25.39<br>(24.07 to 26.76) | 24.36<br>(23.09 to 25.74) | 23.39<br>(22.16 to 24.77) | 22.42<br>(21.18 to 23.8)  | 21.37<br>(20.18 to 22.74) | 20.27<br>(19.09 to 21.6)  |
| <b>Low SDI</b>                   | 26.6<br>(25.67 to 27.61)  | 25.85<br>(24.94 to 26.81) | 25.12<br>(24.28 to 26.06) | 24.4<br>(23.58 to 25.32)  | 23.66<br>(22.85 to 24.55) | 22.9<br>(22.15 to 23.77)  | 22.14<br>(21.41 to 22.98) | 21.37<br>(20.67 to 22.16) | 20.56<br>(19.89 to 21.3)  | 19.86<br>(19.23 to 20.57) | 19.06<br>(18.46 to 19.73) |
| <b>High-income</b>               | 3.05<br>(2.96 to 3.14)    | 3.04<br>(2.96 to 3.12)    | 3.02<br>(2.94 to 3.11)    | 2.99<br>(2.9 to 3.07)     | 2.94<br>(2.85 to 3.04)    | 2.9<br>(2.8 to 3.02)      | 2.87<br>(2.73 to 3.02)    | 2.83<br>(2.68 to 3.02)    | 2.78<br>(2.6 to 3.01)     | 2.75<br>(2.57 to 3.03)    | 2.75<br>(2.52 to 3.02)    |
| <b>High-income North America</b> | 2.85<br>(2.72 to 2.98)    | 2.9<br>(2.77 to 3.02)     | 2.9<br>(2.77 to 3.03)     | 2.88<br>(2.75 to 3.01)    | 2.84<br>(2.71 to 2.97)    | 2.81<br>(2.69 to 2.95)    | 2.8<br>(2.66 to 2.95)     | 2.78<br>(2.61 to 2.94)    | 2.74<br>(2.54 to 2.94)    | 2.76<br>(2.55 to 3)       | 2.73<br>(2.51 to 3)       |
| <b>Canada</b>                    | 2.14<br>(2.11 to 2.17)    | 2.13<br>(2.1 to 2.16)     | 2.11<br>(2.08 to 2.14)    | 2.1<br>(2.07 to 2.13)     | 2.11<br>(2.08 to 2.14)    | 2.07<br>(2.02 to 2.1)     | 2.05<br>(2.02 to 2.08)    | 2.05<br>(2.02 to 2.08)    | 2.04<br>(2.0 to 2.07)     | 2.03<br>(2.0 to 2.07)     | 2.02<br>(1.99 to 2.06)    |
| <b>Greenland</b>                 | 6.89<br>(6.42 to 7.39)    | 6.71<br>(6.27 to 7.18)    | 6.64<br>(6.2 to 7.1)      | 6.32<br>(5.91 to 6.76)    | 6.28<br>(5.85 to 6.72)    | 6.46<br>(6.03 to 6.91)    | 6.49<br>(6.05 to 6.95)    | 6.21<br>(5.79 to 6.66)    | 5.62<br>(5.25 to 6.03)    | 5.72<br>(5.34 to 6.15)    | 5.57<br>(5.21 to 6.01)    |
| <b>United States</b>             | 2.91<br>(2.77 to 3.04)    | 2.96<br>(2.82 to 3.1)     | 2.97<br>(2.83 to 3.11)    | 2.95<br>(2.82 to 3.09)    | 2.9<br>(2.77 to 3.04)     | 2.88<br>(2.74 to 3.04)    | 2.87<br>(2.72 to 3.04)    | 2.85<br>(2.67 to 3.02)    | 2.8<br>(2.59 to 3.03)     | 2.83<br>(2.6 to 3.09)     | 2.8<br>(2.56 to 3.1)      |
| <b>Australasia</b>               | 3.23<br>(3.03 to 3.48)    | 3.24<br>(2.99 to 3.48)    | 3.28<br>(3.03 to 3.54)    | 3.33<br>(3.07 to 3.6)     | 3.34<br>(3.08 to 3.62)    | 3.25<br>(2.99 to 3.56)    | 3.17<br>(2.87 to 3.48)    | 3.2<br>(2.88 to 3.54)     | 3.15<br>(2.81 to 3.5)     | 3.13<br>(2.78 to 3.53)    | 3.07<br>(2.71 to 3.46)    |
| <b>Australia</b>                 | 3.21<br>(2.93 to 3.51)    | 3.22<br>(2.92 to 3.53)    | 3.27<br>(2.97 to 3.58)    | 3.32<br>(3.02 to 3.64)    | 3.32<br>(3.02 to 3.66)    | 3.11<br>(2.91 to 3.56)    | 3.11<br>(2.78 to 3.46)    | 3.15<br>(2.8 to 3.53)     | 3.08<br>(2.71 to 3.45)    | 3.01<br>(2.7 to 3.49)     | 3.01<br>(2.64 to 3.43)    |
| <b>New Zealand</b>               | 3.33<br>(3.2 to 3.46)     | 3.31<br>(3.19 to 3.44)    | 3.32<br>(3.19 to 3.46)    | 3.36<br>(3.23 to 3.5)     | 3.42<br>(3.27 to 3.58)    | 3.45<br>(3.29 to 3.62)    | 3.46<br>(3.29 to 3.64)    | 3.45<br>(3.26 to 3.64)    | 3.42<br>(3.3 to 3.74)     | 3.45<br>(3.22 to 3.69)    | 3.34<br>(3.11 to 3.59)    |
| <b>High-income Asia Pacific</b>  | 2.31<br>(2.22 to 2.41)    | 2.25<br>(2.16 to 2.34)    | 2.19<br>(2.09 to 2.3)     | 2.07<br>(2.0 to 2.2)      | 2.07<br>(1.96 to 2.18)    | 2.04<br>(1.91 to 2.17)    | 2.02<br>(1.84 to 2.17)    | 1.94<br>(1.75 to 2.14)    | 1.89<br>(1.67 to 2.13)    | 1.85<br>(1.6 to 2.11)     | 1.81<br>(1.54 to 2.11)    |
| <b>Brunei</b>                    | 3.91<br>(3.7 to 4.11)     | 3.71<br>(3.52 to 3.91)    | 3.52<br>(3.33 to 3.71)    | 3.37<br>(3.18 to 3.57)    | 3.12<br>(2.92 to 3.33)    | 3.05<br>(2.84 to 3.28)    | 3.07<br>(2.76 to 3.25)    | 3.1<br>(2.56 to 3.09)     | 2.82<br>(2.47 to 3.05)    | 2.68<br>(2.38 to 3.01)    | 2.63<br>(2.31 to 2.99)    |
| <b>Japan</b>                     | 2.2<br>(2.07 to 2.33)     | 2.14<br>(2.02 to 2.28)    | 2.12<br>(2.0 to 2.25)     | 2.05<br>(1.93 to 2.18)    | 2.01<br>(1.89 to 2.14)    | 1.99<br>(1.84 to 2.14)    | 1.96<br>(1.76 to 2.16)    | 1.89<br>(1.66 to 2.14)    | 1.84<br>(1.56 to 2.14)    | 1.81<br>(1.48 to 2.14)    | 1.74<br>(1.41 to 2.14)    |
| <b>Singapore</b>                 | 2.44<br>(2.35 to 2.54)    | 2.38<br>(2.29 to 2.48)    | 2.36<br>(2.27 to 2.45)    | 2.35<br>(2.26 to 2.45)    | 2.3<br>(2.21 to 2.45)     | 2.25<br>(2.16 to 2.35)    | 2.21<br>(2.12 to 2.31)    | 2.2<br>(2.07 to 2.25)     | 2.08<br>(1.99 to 2.17)    | 2.02<br>(1.94 to 2.11)    | 1.94<br>(1.86 to 2.03)    |
| <b>South Korea</b>               | 2.56<br>(2.33 to 2.69)    | 2.45<br>(2.33 to 2.58)    | 2.33<br>(2.22 to 2.44)    | 2.2<br>(2.09 to 2.3)      | 2.16<br>(2.06 to 2.27)    | 2.12<br>(2.02 to 2.22)    | 2.07<br>(1.97 to 2.18)    | 2.02<br>(1.91 to 2.13)    | 1.98<br>(1.86 to 2.09)    | 1.95<br>(1.84 to 2.06)    | 1.93<br>(1.82 to 2.05)    |
| <b>Western Europe</b>            | 2.59<br>(2.54 to 2.65)    | 2.55<br>(2.49 to 2.61)    | 2.51<br>(2.45 to 2.57)    | 2.49<br>(2.43 to 2.55)    | 2.46<br>(2.4 to 2.53)     | 2.42<br>(2.36 to 2.49)    | 2.39<br>(2.33 to 2.47)    | 2.35<br>(2.29 to 2.44)    | 2.32<br>(2.25 to 2.41)    | 2.29<br>(2.21 to 2.38)    | 2.26<br>(2.18 to 2.36)    |
| <b>Andorra</b>                   | 2.76<br>(2.74 to 2.78)    | 2.74<br>(2.72 to 2.77)    | 2.72<br>(2.7 to 2.75)     | 2.69<br>(2.67 to 2.71)    | 2.67<br>(2.65 to 2.69)    | 2.71<br>(2.69 to 2.73)    | 2.77<br>(2.75 to 2.79)    | 2.73<br>(2.71 to 2.76)    | 2.74<br>(2.72 to 2.76)    | 2.75<br>(2.73 to 2.77)    | 2.74<br>(2.72 to 2.76)    |
| <b>Austria</b>                   | 1.68<br>(1.64 to 1.72)    | 1.67<br>(1.63 to 1.71)    | 1.72<br>(1.68 to 1.76)    | 1.79<br>(1.75 to 1.84)    | 1.87<br>(1.82 to 1.92)    | 1.85<br>(1.8 to 1.91)     | 1.8<br>(1.74 to 1.85)     | 1.81<br>(1.75 to 1.87)    | 1.83<br>(1.76 to 1.9)     | 1.83<br>(1.75 to 1.9)     | 1.8<br>(1.72 to 1.88)     |
| <b>Belgium</b>                   | 2.16<br>(1.95 to 2.38)    | 2.13<br>(1.89 to 2.36)    | 2.06<br>(1.82 to 2.31)    | 2.02<br>(1.77 to 2.29)    | 2<br>(1.71 to 2.3)        | 1.96<br>(1.65 to 2.31)    | 1.96<br>(1.63 to 2.35)    | 1.92<br>(1.56 to 2.35)    | 1.86<br>(1.5 to 2.33)     | 1.82<br>(1.42 to 2.35)    | 1.78<br>(1.37 to 2.34)    |
| <b>Cyprus</b>                    | 3.17<br>(3.02 to 3.31)    | 3.01<br>(2.87 to 3.14)    | 2.88<br>(2.75 to 3.01)    | 2.79<br>(2.66 to 2.91)    | 2.61<br>(2.49 to 2.73)    | 2.48<br>(2.37 to 2.59)    | 2.47<br>(2.36 to 2.59)    | 2.44<br>(2.04 to 2.24)    | 2.14<br>(2.05 to 2.24)    | 2.15<br>(2.05 to 2.25)    | 2.11<br>(2.02 to 2.21)    |
| <b>Denmark</b>                   | 1.59<br>(1.46 to 1.73)    | 1.55<br>(1.41 to 1.68)    | 1.48<br>(1.34 to 1.62)    | 1.39<br>(1.25 to 1.54)    | 1.34<br>(1.2 to 1.5)      | 1.32<br>(1.17 to 1.51)    | 1.31<br>(1.14 to 1.51)    | 1.31<br>(1.13 to 1.53)    | 1.32<br>(1.14 to 1.56)    | 1.29<br>(1.1 to 1.53)     | 1.26<br>(1.07 to 1.52)    |
| <b>Finland</b>                   | 1.46<br>(1.42 to 1.51)    | 1.45<br>(1.41 to 1.5)     | 1.43<br>(1.38 to 1.48)    | 1.38<br>(1.34 to 1.43)    | 1.35<br>(1.3 to 1.39)     | 1.35<br>(1.3 to 1.4)      | 1.34<br>(1.3 to 1.39)     | 1.23<br>(1.18 to 1.27)    | 1.23<br>(1.19 to 1.28)    | 1.11<br>(1.08 to 1.16)    | 1.11<br>(1.07 to 1.15)    |
| <b>France</b>                    | 3.72<br>(3.63 to 3.8)     | 3.63<br>(3.55 to 3.72)    | 3.65<br>(3.56 to 3.74)    | 3.61<br>(3.52 to 3.7)     | 3.62<br>(3.53 to 3.71)    | 3.63<br>(3.55 to 3.72)    | 3.45<br>(3.37 to 3.54)    | 3.51<br>(3.42 to 3.6)     | 3.43<br>(3.35 to 3.52)    | 3.38<br>(3.3 to 3.47)     | 3.34<br>(3.26 to 3.43)    |
| <b>Germany</b>                   | 1.71<br>(1.7 to 1.73)     | 1.77<br>(1.75 to 1.78)    | 1.68<br>(1.67 to 1.7)     | 1.65<br>(1.63 to 1.66)    | 1.63<br>(1.62 to 1.65)    | 1.67<br>(1.66 to 1.69)    | 1.57<br>(1.56 to 1.59)    | 1.57<br>(1.56 to 1.59)    | 1.57<br>(1.55 to 1.58)    | 1.52<br>(1.51 to 1.54)    | 1.48<br>(1.47 to 1.5)     |
| <b>Greece</b>                    | 2.03<br>(1.99 to 2.07)    | 1.96<br>(1.92 to 2)       | 1.84<br>(1.8 to 1.88)     | 1.86<br>(1.82 to 1.91)    | 1.92<br>(1.88 to 1.96)    | 1.91<br>(1.85 to 1.93)    | 1.84<br>(1.8 to 1.88)     | 1.91<br>(1.87 to 1.96)    | 1.98<br>(1.94 to 2.03)    | 1.9<br>(1.86 to 1.95)     | 1.87<br>(1.83 to 1.91)    |
| <b>Iceland</b>                   | 1.46<br>(1.31 to 1.61)    | 1.44<br>(1.3 to 1.6)      | 1.42<br>(1.28 to 1.58)    | 1.36<br>(1.22 to 1.53)    | 1.35<br>(1.21 to 1.51)    | 1.28<br>(1.14 to 1.43)    | 1.25<br>(1.12 to 1.4)     | 1.26<br>(1.13 to 1.43)    | 1.25<br>(1.12 to 1.42)    | 1.27<br>(1.13 to 1.44)    | 1.21<br>(1.08 to 1.38)    |
| <b>Ireland</b>                   | 2.51<br>(2.39 to 2.64)    | 2.39<br>(2.27 to 2.51)    | 2.37<br>(2.25 to 2.5)     | 2.3<br>(2.18 to 2.43)     | 2.28<br>(2.16 to 2.4)     | 2.22<br>(2.1 to 2.35)     | 2.19<br>(2.07 to 2.31)    | 2.21<br>(2.09 to 2.34)    | 2.23<br>(2.1 to 2.37)     | 2.25<br>(2.05 to 2.31)    | 2.17<br>(2.01 to 2.27)    |
| <b>Israel</b>                    | 2.54<br>(2.36 to 2.75)    | 2.5<br>(2.31 to 2.71)     | 2.52<br>(2.34 to 2.72)    | 2.56<br>(2.36 to 2.76)    | 2.61<br>(2.39 to 2.82)    | 2.65<br>(2.42 to 2.89)    | 2.68<br>(2.44 to 2.88)    | 2.74<br>(2.22 to 2.78)    | 2.53<br>(2.23 to 2.87)    | 2.47<br>(2.16 to 2.81)    | 2.39<br>(2.08 to 2.75)    |
| <b>Italy</b>                     | 1.83<br>(1.7 to 1.96)     | 1.76<br>(1.63 to 1.89)    | 1.75<br>(1.62 to 1.89)    | 1.76<br>(1.62 to 1.9)     | 1.7<br>(1.57 to 1.84)     | 1.66<br>(1.52 to 1.81)    | 1.66<br>(1.52 to 1.81)    | 1.57<br>(1.43 to 1.71)    | 1.53<br>(1.4 to 1.68)     | 1.5<br>(1.36 to 1.65)     | 1.47<br>(1.33 to 1.62)    |
| <b>Luxembourg</b>                | 1.86<br>(1.64 to 2.09)    | 1.91<br>(1.68 to 2.16)    | 1.82<br>(1.58 to 2.07)    | 1.83<br>(1.58 to 2.1)     | 2.03<br>(1.75 to 2.34)    | 2.07<br>(1.77 to 2.39)    | 1.73<br>(1.48 to 2.03)    | 1.99<br>(1.68 to 2.36)    | 2.01<br>(1.69 to 2.41)    | 1.91<br>(1.52 to 2.31)    | 1.83<br>(1.52 to 2.25)    |
| <b>Malta</b>                     | 2.62<br>(2.59 to 2.65)    | 2.72<br>(2.69 to 2.75)    | 2.93<br>(2.9 to 2.97)     | 2.74<br>(2.71 to 2.77)    | 2.73<br>(2.7 to 2.76)     | 2.8<br>(2.77 to 2.83)     | 2.71<br>(2.68 to 2.74)    | 2.77<br>(2.74 to 2.8)     | 2.6<br>(2.57 to 2.63)     | 2.59<br>(2.57 to 2.62)    | 2.55<br>(2.52 to 2.58)    |
| <b>Netherlands</b>               | 2.24<br>(2.01 to 2.49)    | 2.09<br>(1.89 to 2.31)    | 1.99<br>(1.79 to 2.2)     | 1.94<br>(1.75 to 2.14)    | 1.92<br>(1.72 to 2.11)    | 1.89<br>(1.67 to 2.11)    | 1.92<br>(1.69 to 2.19)    | 1.92<br>(1.66 to 2.25)    | 1.88<br>(1.56 to 2.25)    | 1.8<br>(1.44 to 2.24)     | 1.77<br>(1.37 to 2.26)    |
| <b>Norway</b>                    | 1.84<br>(1.78 to 1.91)    | 1.8<br>(1.74 to 1.87)     | 1.74<br>(1.68 to 1.81)    | 1.77<br>(1.69 to 1.84)    | 1.67<br>(1.6 to 1.74)     | 1.62<br>(1.54 to 1.69)    | 1.63<br>(1.55 to 1.7)     | 1.6<br>(1.52 to 1.69)     | 1.58<br>(1.5 to 1.68)     | 1.55<br>(1.47 to 1.65)    | 1.51<br>(1.43 to 1.61)    |
| <b>Portugal</b>                  | 2.11<br>(2.06 to 2.16)    | 2.02<br>(1.98 to 2.07)    | 1.95<br>(1.91 to 2)       | 1.94<br>(1.9 to 1.99)     | 1.94<br>(1.76 to 1.84)    | 1.85<br>(1.77 to 1.85)    | 1.81<br>(1.77 to 1.86)    | 1.76<br>(1.71 to 1.8)     | 1.73<br>(1.68 to 1.77)    | 1.63<br>(1.62 to 1.71)    | 1.63<br>(1.57 to 1.65)    |
| <b>Spain</b>                     | 1.48<br>(1.4 to 1.56)     | 1.45<br>(1.37 to 1.53)    | 1.43<br>(1.35 to 1.51)    | 1.4<br>(1.33 to 1.49)     | 1.39<br>(1.32 to 1.48)    | 1.39<br>(1.31 to 1.48)    | 1.39<br>(1.31 to 1.49)    | 1.4<br>(1.21 to 1.4)      | 1.31<br>(1.22 to 1.41)    | 1.31<br>(1.22 to 1.42)    | 1.3<br>(1.22 to 1.41)     |
| <b>Sweden</b>                    | 1.9<br>(1.76 to 2.04)     | 1.83<br>(1.7 to 1.96)     | 1.78<br>(1.66 to 1.92)    | 1.86<br>(1.73 to 2.01)    | 1.92<br>(1.77 to 2.08)    | 2.02<br>(1.85 to 2.19)    | 2.13<br>(1.95 to 2.33)    | 2.22<br>(2.0 to 2.48)     | 2.22<br>(1.85 to 2.39)    | 2.08<br>(1.79 to 2.46)    | 2.05<br>(1.72 to 2.47)    |
| <b>Switzerland</b>               | 1.84<br>(1.73 to 1.96)    | 1.81<br>(1.7 to 1.93)     | 1.84<br>(1.69 to 1.93)    | 1.84<br>(1.72 to 1.97)    | 1.8<br>(1.69 to 1.92)     | 1.8<br>(1.68 to 1.92)     | 1.8<br>(1.69 to 1.92)     | 1.8<br>(1.74 to 1.99)     | 1.8<br>(1.75 to 2.03)     | 1.8<br>(1.68 to 1.96)     | 1.8<br>(1.61 to 1.9)      |
| <b>United Kingdom</b>            | 4.27<br>(4.17 to 4.38)    | 4.21<br>(4.11 to 4.32)    | 4.14<br>(4.04 to 4.24)    | 4.03<br>(3.93 to 4.13)    | 3.9<br>(3.81 to 4)        | 3.84<br>(3.75 to 3.94)    | 3.73<br>(3.64 to 3.83)    | 3.61<br>(3.52 to 3.7)     | 3.57<br>(3.48 to 3.66)    | 3.53<br>(3.45 to 3.62)    | 3.5<br>(3.42 to 3.59)     |
| <b>England</b>                   | 3.9<br>(3.81 to 3.99)     | 3.82<br>(3.74 to 3.92)    | 3.79<br>(3.7 to 3.88)     | 3.69<br>(3.6 to 3.78)     | 3.57<br>(3.48 to 3.66)    | 3.41<br>(3.4 to 3.61)     | 3.41<br>(3.33 to 3.5)     | 3.28<br>(3.2 to 3.37)     | 3.24<br>(3.16 to 3.33)    | 3.21<br>(3.14 to 3.3)     | 3.19<br>(3.12 to 3.28)    |
| <b>Northern Ireland</b>          | 6.4<br>(6.27 to 6.55)     | 6.22<br>(6.09 to 6.37)    | 6.12<br>(5.99 to 6.27)    | 6.15<br>(6.01 to 6.31)    | 6.36<br>(6.21 to 6.51)    | 5.84<br>(5.71 to 6.51)    | 5.28<br>(5.16 to 5.78)    | 5.64<br>(5.51 to 5.78)    | 5.57<br>(5.44 to 5.7)     | 5.44<br>(5.31 to 5.57)    | 5.37<br>(5.25 to 5.51)    |
| <b>Scotland</b>                  | 6.76<br>(6.53 to 6.98)    | 6.65<br>(6.44 to 6.87)    | 6.32<br>(6.13 to 6.53)    | 6.03<br>(5.85 to 6.22)    | 5.83<br>(5.66 to 6.01)    | 5.82<br>(5.66 to 5.98)    | 5.78<br>(5.63 to 5.92)    | 5.55<br>(5.41 to 5.69)    | 5.5<br>(5.29 to 5.64)     | 5.41<br>(5.29 to 5.54)    |                           |

Appendix Table 17D. Stillbirth rates (per 1,000 live births) by location, 2006-2016

|                             | 2006                      | 2007                      | 2008                      | 2009                      | 2010                      | 2011                      | 2012                      | 2013                      | 2014                      | 2015                      | 2016                     |
|-----------------------------|---------------------------|---------------------------|---------------------------|---------------------------|---------------------------|---------------------------|---------------------------|---------------------------|---------------------------|---------------------------|--------------------------|
| Albania                     | 5.05<br>(5.56 to 5.74)    | 5.55<br>(5.46 to 5.64)    | 5.4                       | 5.23<br>(5.15 to 5.32)    | 5.05<br>(4.97 to 5.14)    | 4.9<br>(4.82 to 4.99)     | 4.75<br>(4.67 to 4.83)    | 4.58<br>(4.51 to 4.67)    | 4.43<br>(4.35 to 4.51)    | 4.29<br>(4.22 to 4.36)    | 4.13<br>(4.06 to 4.21)   |
| Bosnia and Herzegovina      | 4.49<br>(4.17 to 4.84)    | 4.38<br>(4.06 to 4.74)    | 4.25<br>(3.94 to 4.58)    | 4.13<br>(3.83 to 4.45)    | 4.02<br>(3.73 to 4.31)    | 3.88<br>(3.59 to 4.19)    | 3.79<br>(3.48 to 4.09)    | 3.73<br>(3.4 to 4.08)     | 3.65<br>(3.28 to 4.04)    | 3.62<br>(3.22 to 4.07)    | 3.56<br>(3.16 to 4.01)   |
| Bulgaria                    | 3.9<br>(3.46 to 4.37)     | 3.85<br>(3.41 to 4.31)    | 3.79<br>(3.36 to 4.23)    | 4.03<br>(3.57 to 4.5)     | 4.19<br>(3.71 to 4.68)    | 4.02<br>(3.55 to 4.5)     | 3.93<br>(3.45 to 4.41)    | 3.85<br>(3.38 to 4.34)    | 3.88<br>(3.4 to 4.4)      | 3.92<br>(3.42 to 4.49)    | 3.9<br>(3.38 to 4.48)    |
| Croatia                     | 2.83<br>(2.72 to 2.94)    | 2.78<br>(2.67 to 2.89)    | 2.72<br>(2.61 to 2.83)    | 2.71<br>(2.61 to 2.83)    | 2.66<br>(2.55 to 2.77)    | 2.59<br>(2.47 to 2.7)     | 2.5<br>(2.39 to 2.61)     | 2.45<br>(2.34 to 2.57)    | 2.4<br>(2.29 to 2.52)     | 2.35<br>(2.24 to 2.47)    | 2.29<br>(2.17 to 2.41)   |
| Czech Republic              | 1.87<br>(1.76 to 1.98)    | 1.86<br>(1.75 to 1.98)    | 1.8<br>(1.69 to 1.9)      | 1.8<br>(1.69 to 1.92)     | 1.82<br>(1.71 to 1.93)    | 1.81<br>(1.69 to 1.93)    | 1.77<br>(1.65 to 1.9)     | 1.72<br>(1.58 to 1.86)    | 1.71<br>(1.56 to 1.86)    | 1.72<br>(1.57 to 1.89)    | 1.65<br>(1.49 to 1.83)   |
| Hungary                     | 2.54<br>(2.45 to 2.64)    | 2.57<br>(2.47 to 2.67)    | 2.56<br>(2.46 to 2.66)    | 2.49<br>(2.39 to 2.59)    | 2.49<br>(2.4 to 2.58)     | 2.46<br>(2.37 to 2.55)    | 2.42<br>(2.32 to 2.52)    | 2.4<br>(2.31 to 2.51)     | 2.36<br>(2.26 to 2.46)    | 2.39<br>(2.29 to 2.5)     | 2.39<br>(2.29 to 2.5)    |
| Macedonia                   | 8.79<br>(8.34 to 9.24)    | 8.21<br>(7.88 to 8.56)    | 8.22<br>(7.95 to 8.5)     | 8.36<br>(8.11 to 8.61)    | 7.42<br>(7.18 to 7.66)    | 7.04<br>(6.73 to 7.34)    | 7.35<br>(7.3 to 7.4)      | 7.5<br>(7.4 to 7.5)       | 8.39<br>(7.65 to 9.3)     | 8.4<br>(7.27 to 9.22)     | 7.74<br>(6.73 to 8.88)   |
| Montenegro                  | 4.05<br>(3.75 to 4.36)    | 3.87<br>(3.57 to 4.18)    | 3.72<br>(3.44 to 4.02)    | 3.61<br>(3.33 to 3.93)    | 3.54<br>(3.26 to 3.86)    | 3.46<br>(3.16 to 3.78)    | 3.4<br>(3.11 to 3.73)     | 3.34<br>(3.06 to 3.68)    | 3.32<br>(3.02 to 3.65)    | 3.3<br>(2.99 to 3.65)     | 3.26<br>(2.96 to 3.63)   |
| Poland                      | 2.24<br>(2.09 to 2.41)    | 2.19<br>(2.04 to 2.35)    | 2.15<br>(1.96 to 2.3)     | 2.12<br>(1.96 to 2.28)    | 2.03<br>(1.88 to 2.17)    | 1.98<br>(1.84 to 2.12)    | 2.03<br>(1.89 to 2.19)    | 2.12<br>(1.95 to 2.31)    | 2.14<br>(1.91 to 2.37)    | 2.08<br>(1.81 to 2.4)     | 2.02<br>(1.71 to 2.38)   |
| Romania                     | 6.06<br>(6.02 to 6.1)     | 5.4<br>(5.36 to 5.44)     | 5.14<br>(5.1 to 5.17)     | 4.93<br>(4.9 to 4.96)     | 4.92<br>(4.88 to 4.95)    | 4.76<br>(4.73 to 4.8)     | 4.61<br>(4.58 to 4.65)    | 4.38<br>(4.35 to 4.41)    | 4.24<br>(4.21 to 4.27)    | 4.03<br>(4.01 to 4.06)    | 3.91<br>(3.89 to 3.94)   |
| Serbia                      | 5.79<br>(5.7 to 6.04)     | 5.56<br>(5.35 to 5.81)    | 5.38<br>(5.12 to 5.62)    | 5.36<br>(5.12 to 5.6)     | 5.39<br>(5.12 to 5.65)    | 5.4<br>(5.11 to 5.69)     | 5.26<br>(4.96 to 5.56)    | 5.16<br>(4.84 to 5.49)    | 4.87<br>(4.54 to 5.2)     | 4.78<br>(4.46 to 5.11)    | 4.52<br>(4.39 to 5.08)   |
| Slovakia                    | 2.6<br>(2.52 to 2.69)     | 2.54<br>(2.45 to 2.62)    | 2.49<br>(2.4 to 2.57)     | 2.51<br>(2.43 to 2.6)     | 2.43<br>(2.35 to 2.51)    | 2.29<br>(2.21 to 2.36)    | 2.33<br>(2.25 to 2.41)    | 2.31<br>(2.23 to 2.39)    | 2.37<br>(2.29 to 2.45)    | 2.36<br>(2.28 to 2.45)    | 2.31<br>(2.22 to 2.39)   |
| Slovenia                    | 2.29<br>(2.16 to 2.42)    | 2.22<br>(2.09 to 2.35)    | 2.15<br>(2.01 to 2.29)    | 2.12<br>(1.98 to 2.27)    | 2.12<br>(1.97 to 2.27)    | 2.12<br>(1.97 to 2.28)    | 2.08<br>(1.92 to 2.25)    | 2.08<br>(1.91 to 2.26)    | 2.02<br>(1.86 to 2.2)     | 2.02<br>(1.81 to 2.17)    | 1.94<br>(1.72 to 2.14)   |
| Central Asia                | 9.87<br>(9.61 to 10.12)   | 9.59<br>(9.34 to 9.84)    | 9.3<br>(9.06 to 9.55)     | 9.3<br>(8.8 to 9.29)      | 9.3<br>(8.55 to 9.02)     | 8.7<br>(8.28 to 8.75)     | 8.25<br>(8.03 to 8.49)    | 8.25<br>(7.8 to 8.26)     | 7.8<br>(7.59 to 8.04)     | 7.61<br>(7.41 to 7.84)    | 7.37<br>(7.18 to 7.6)    |
| Armenia                     | 7.57<br>(7.21 to 7.93)    | 7.48<br>(7.14 to 7.85)    | 7.43<br>(7.06 to 7.81)    | 7.49<br>(7.11 to 7.89)    | 7.55<br>(7.13 to 7.99)    | 7.56<br>(7.08 to 8.04)    | 7.45<br>(6.95 to 7.98)    | 7.24<br>(6.71 to 7.81)    | 7.15<br>(6.56 to 7.79)    | 7.04<br>(6.41 to 7.76)    | 6.83<br>(6.15 to 7.59)   |
| Azerbaijan                  | 12.93<br>(12.44 to 13.42) | 12.38<br>(11.91 to 12.84) | 11.42<br>(11.4 to 12.29)  | 11.04<br>(11 to 11.88)    | 11.04<br>(10.64 to 11.49) | 10.45<br>(10.36 to 11.2)  | 10.75<br>(10.06 to 10.89) | 10.19<br>(9.83 to 10.62)  | 9.93<br>(9.58 to 10.35)   | 9.7<br>(9.35 to 10.11)    | 9.4<br>(9.06 to 9.81)    |
| Georgia                     | 6.88<br>(7.5 to 8.35)     | 6.33<br>(7.15 to 7.97)    | 5.93<br>(6.84 to 7.67)    | 5.77<br>(6.59 to 7.41)    | 5.77<br>(6.31 to 7.12)    | 6.7<br>(6.03 to 6.85)     | 6.26<br>(5.78 to 6.61)    | 5.88<br>(5.55 to 6.38)    | 5.66<br>(5.34 to 6.17)    | 5.44<br>(5.14 to 5.97)    | 5.16<br>(4.93 to 5.77)   |
| Kazakhstan                  | 12.1<br>(8.57 to 8.79)    | 11.87<br>(8.25 to 8.41)   | 11.61<br>(7.88 to 7.99)   | 11.37<br>(7.52 to 7.63)   | 11.18<br>(7.4 to 7.25)    | 10.93<br>(6.61 to 6.8)    | 10.75<br>(6.15 to 6.39)   | 10.58<br>(5.74 to 6.03)   | 10.38<br>(5.39 to 5.72)   | 10.19<br>(5.16 to 5.53)   | 9.89<br>(4.97 to 5.37)   |
| Kyrgyzstan                  | 11.29<br>(11.14 to 12.58) | 11.13<br>(11.44 to 12.33) | 10.88<br>(11.94 to 12.05) | 10.64<br>(10.54 to 11.8)  | 10.37<br>(10.74 to 11.5)  | 10.06<br>(9.1 to 11.16)   | 9.76<br>(8.84 to 10.84)   | 9.45<br>(8.54 to 10.49)   | 9.14<br>(8.26 to 10.18)   | 8.83<br>(7.98 to 9.83)    | 8.5<br>(7.7 to 9.5)      |
| Mongolia                    | 9.73<br>(9.36 to 10.08)   | 9.41<br>(9.05 to 9.76)    | 9.11<br>(8.78 to 9.44)    | 8.88<br>(8.49 to 9.2)     | 8.65<br>(8.32 to 8.98)    | 8.37<br>(8.05 to 8.7)     | 8.09<br>(7.78 to 8.41)    | 7.84<br>(7.55 to 8.15)    | 7.61<br>(7.34 to 7.92)    | 7.4<br>(7.13 to 7.71)     | 7.14<br>(6.88 to 7.45)   |
| Tajikistan                  | 10.6<br>(10.35 to 10.85)  | 10.24<br>(10.01 to 10.49) | 9.97<br>(9.74 to 10.22)   | 9.81<br>(9.59 to 10.05)   | 9.69<br>(9.47 to 9.93)    | 9.59<br>(9.28 to 9.82)    | 9.5<br>(9.28 to 9.73)     | 9.4<br>(9.19 to 9.62)     | 9.26<br>(9.05 to 9.48)    | 9.14<br>(8.92 to 9.36)    | 8.93<br>(8.72 to 9.15)   |
| Turkmenistan                | 11.39<br>(11.2 to 11.58)  | 10.93<br>(10.75 to 11.11) | 10.49<br>(10.33 to 10.67) | 10.06<br>(9.9 to 10.22)   | 9.64<br>(9.49 to 9.79)    | 9.28<br>(9.14 to 9.43)    | 8.89<br>(8.76 to 9.04)    | 8.65<br>(8.52 to 8.79)    | 8.32<br>(8.19 to 8.46)    | 8.09<br>(7.97 to 8.23)    | 7.74<br>(7.62 to 7.87)   |
| Uzbekistan                  | 9.12<br>(8.78 to 9.45)    | 8.98<br>(8.64 to 9.32)    | 8.8<br>(8.47 to 9.13)     | 8.61<br>(8.27 to 8.92)    | 8.37<br>(8.05 to 8.7)     | 8.15<br>(7.84 to 8.46)    | 7.94<br>(7.64 to 8.25)    | 7.74<br>(7.45 to 8.05)    | 7.57<br>(7.3 to 7.88)     | 7.38<br>(7.11 to 7.69)    | 7.14<br>(6.88 to 7.45)   |
| Latin America and Caribbean | 8.36<br>(7.91 to 8.88)    | 8.1<br>(7.65 to 8.59)     | 7.86<br>(7.42 to 8.35)    | 7.67<br>(7.23 to 8.17)    | 7.49<br>(7.06 to 7.99)    | 7.3<br>(6.88 to 7.8)      | 7.11<br>(6.69 to 7.62)    | 6.92<br>(6.51 to 7.42)    | 6.73<br>(6.33 to 7.24)    | 6.56<br>(6.15 to 7.07)    | 6.38<br>(5.96 to 6.86)   |
| Central Latin America       | 7.05<br>(6.69 to 7.44)    | 6.88<br>(6.53 to 7.26)    | 6.7<br>(6.36 to 7.08)     | 6.36<br>(6.22 to 6.92)    | 6.4<br>(6.07 to 6.76)     | 6.23<br>(5.9 to 6.6)      | 6.07<br>(5.75 to 6.44)    | 5.91<br>(5.61 to 6.27)    | 5.74<br>(5.45 to 6.08)    | 5.58<br>(5.29 to 5.92)    | 5.41<br>(5.13 to 5.74)   |
| Colombia                    | 11.29<br>(10.23 to 12.49) | 11.13<br>(10.05 to 12.31) | 10.88<br>(9.83 to 12.03)  | 10.64<br>(9.63 to 11.8)   | 10.37<br>(9.37 to 11.5)   | 10.06<br>(9.1 to 11.16)   | 9.76<br>(8.84 to 10.84)   | 9.45<br>(8.54 to 10.49)   | 9.14<br>(8.26 to 10.18)   | 8.83<br>(7.98 to 9.83)    | 8.5<br>(7.7 to 9.5)      |
| Costa Rica                  | 6.84<br>(6.58 to 7.12)    | 6.8<br>(6.53 to 7.07)     | 6.75<br>(6.47 to 7.03)    | 6.71<br>(6.42 to 7)       | 6.7<br>(6.36 to 6.97)     | 6.59<br>(6.28 to 6.92)    | 6.49<br>(6.16 to 6.84)    | 6.24<br>(6.02 to 6.77)    | 6.09<br>(5.87 to 6.68)    | 5.91<br>(5.7 to 6.42)     | 5.5<br>(5.49 to 6.42)    |
| El Salvador                 | 6.79<br>(6.62 to 6.96)    | 6.42<br>(6.25 to 6.58)    | 6.11<br>(5.96 to 6.27)    | 5.9<br>(5.75 to 6.05)     | 5.71<br>(5.56 to 5.86)    | 5.35<br>(5.38 to 5.67)    | 5.25<br>(5.21 to 5.5)     | 5.17<br>(5.04 to 5.31)    | 4.93<br>(4.81 to 5.06)    | 4.77<br>(4.58 to 4.83)    | 4.46<br>(4.35 to 4.59)   |
| Guatemala                   | 9.26<br>(8.56 to 9.97)    | 8.91<br>(8.23 to 9.57)    | 8.57<br>(7.92 to 9.2)     | 8.25<br>(7.61 to 8.87)    | 7.96<br>(7.32 to 8.58)    | 7.44<br>(7.06 to 8.35)    | 7.22<br>(6.79 to 8.12)    | 7.01<br>(6.56 to 7.89)    | 6.82<br>(6.36 to 7.69)    | 6.57<br>(6.1 to 7.5)      | 6.27<br>(5.94 to 7.27)   |
| Honduras                    | 10.51<br>(10.45 to 10.56) | 10.29<br>(10.23 to 10.34) | 10.07<br>(10.02 to 10.13) | 9.86<br>(9.81 to 9.92)    | 9.69<br>(9.63 to 9.74)    | 9.5<br>(9.45 to 9.56)     | 9.31<br>(9.26 to 9.37)    | 9.19<br>(9.14 to 9.25)    | 8.91<br>(8.86 to 8.96)    | 8.69<br>(8.62 to 8.72)    | 8.37<br>(8.3 to 8.44)    |
| Mexico                      | 5.26<br>(5.07 to 5.47)    | 5.13<br>(4.94 to 5.33)    | 5<br>(4.81 to 5.2)        | 4.89<br>(4.7 to 5.09)     | 4.77<br>(4.57 to 4.98)    | 4.64<br>(4.46 to 4.8)     | 4.52<br>(4.34 to 4.71)    | 4.4<br>(4.21 to 4.59)     | 4.27<br>(4.09 to 4.48)    | 4.14<br>(3.98 to 4.36)    | 4.04<br>(3.87 to 4.24)   |
| Nicaragua                   | 7.73<br>(7.61 to 8.4)     | 7.53<br>(7.38 to 7.6)     | 7.27<br>(7.16 to 7.37)    | 7.06<br>(6.95 to 7.16)    | 6.85<br>(6.75 to 6.95)    | 6.62<br>(6.52 to 6.72)    | 6.46<br>(6.3 to 6.5)      | 6.19<br>(6.1 to 6.29)     | 6.06<br>(5.84 to 6.41)    | 5.88<br>(5.75 to 5.74)    | 5.66<br>(5.29 to 5.45)   |
| Panama                      | 6.16<br>(6.04 to 6.28)    | 6.07<br>(5.96 to 6.18)    | 5.92<br>(5.82 to 6.02)    | 5.78<br>(5.68 to 5.88)    | 5.65<br>(5.56 to 5.75)    | 5.52<br>(5.42 to 5.61)    | 5.39<br>(5.3 to 5.49)     | 5.26<br>(5.15 to 5.37)    | 5.11<br>(4.99 to 5.24)    | 4.94<br>(4.79 to 5.09)    | 4.79<br>(4.61 to 4.97)   |
| Venezuela                   | 6.19<br>(5.87 to 6.53)    | 5.99<br>(5.67 to 6.35)    | 5.86<br>(5.52 to 6.23)    | 5.84<br>(5.5 to 6.22)     | 5.83<br>(5.48 to 6.23)    | 5.8<br>(5.44 to 6.2)      | 5.76<br>(5.4 to 6.17)     | 5.71<br>(5.33 to 6.15)    | 5.66<br>(5.26 to 6.1)     | 5.63<br>(5.23 to 6.1)     | 5.6<br>(5.2 to 6.09)     |
| Andean Latin America        | 10.1<br>(9.14 to 11.17)   | 9.39<br>(8.54 to 10.34)   | 8.7<br>(7.93 to 9.55)     | 8.21<br>(7.53 to 8.99)    | 7.85<br>(7.22 to 8.57)    | 7.53<br>(6.93 to 8.19)    | 7.23<br>(6.68 to 7.86)    | 6.97<br>(6.45 to 7.56)    | 6.72<br>(6.22 to 7.3)     | 6.47<br>(6.01 to 7.03)    | 6.24<br>(5.79 to 6.74)   |
| Bolivia                     | 14.58<br>(12.03 to 17.42) | 13.47<br>(11.13 to 16.1)  | 12.44<br>(10.34 to 14.88) | 11.71<br>(9.71 to 14.05)  | 11.14<br>(9.23 to 13.42)  | 10.67<br>(8.83 to 12.97)  | 10.26<br>(8.5 to 12.57)   | 9.9<br>(8.19 to 12.13)    | 9.57<br>(7.97 to 11.69)   | 9.26<br>(7.71 to 11.29)   | 8.9<br>(7.4 to 10.9)     |
| Ecuador                     | 8.26<br>(7.51 to 9.05)    | 7.79<br>(7.19 to 8.42)    | 7.29<br>(6.82 to 7.77)    | 6.86<br>(6.51 to 7.23)    | 6.55<br>(6.28 to 6.83)    | 6.27<br>(6.03 to 6.51)    | 6.03<br>(5.77 to 6.3)     | 5.85<br>(5.55 to 6.16)    | 5.65<br>(5.31 to 6.02)    | 5.46<br>(5.08 to 5.87)    | 5.29<br>(4.84 to 5.76)   |
| Peru                        | 9.13<br>(8.32 to 9.96)    | 8.48<br>(7.71 to 9.25)    | 7.85<br>(7.15 to 8.57)    | 7.46<br>(6.78 to 8.13)    | 7.06<br>(6.51 to 7.82)    | 6.62<br>(6.24 to 7.54)    | 6.37<br>(5.96 to 7.3)     | 6.13<br>(5.69 to 7.07)    | 6.13<br>(5.46 to 6.84)    | 5.88<br>(5.23 to 6.57)    | 5.63<br>(5.05 to 6.33)   |
| Caribbean                   | 20.32<br>(17.56 to 23.42) | 20.04<br>(17.35 to 23.12) | 19.64<br>(17.07 to 22.66) | 19.22<br>(16.7 to 22.22)  | 18.79<br>(16.35 to 21.83) | 18.33<br>(16.01 to 21.31) | 17.87<br>(15.61 to 20.7)  | 17.27<br>(15.15 to 20.08) | 16.34<br>(14.69 to 19.46) | 15.82<br>(14.28 to 18.92) | 15.82<br>(13.83 to 18.3) |
| Antigua and Barbuda         | 10.33<br>(8.31 to 12.61)  | 10.14<br>(8.16 to 12.39)  | 9.6<br>(7.76 to 11.74)    | 9.28<br>(7.5 to 11.47)    | 9.12<br>(7.38 to 11.27)   | 8.95<br>(7.24 to 11.12)   | 8.72<br>(7.04 to 10.86)   | 8.61<br>(7.0 to 10.71)    | 8.27<br>(6.82 to 10.46)   | 8.1<br>(6.73 to 10.35)    | 8.1<br>(6.62 to 10.21)   |
| The Bahamas                 | 10.36<br>(12.88 to 14.63) | 10.15<br>(12.67 to 14.51) | 9.97<br>(12.52 to 14.64)  | 9.86<br>(12.09 to 14.63)  | 9.84<br>(11.58 to 14.64)  | 9.76<br>(10.61 to 14.21)  | 9.59<br>(10.35 to 14.72)  | 9.44<br>(9.89 to 14.77)   | 9.44<br>(9.6 to 15.18)    | 9.39<br>(9.31 to 15.65)   | 9.35<br>(9.05 to 15.87)  |
| Barbados                    | 12.16<br>(9.79 to 14.85)  | 11.65<br>(9.37 to 14.23)  | 11.3<br>(9.14 to 13.82)   | 11.1<br>(8.97 to 13.71)   | 10.87<br>(8.79 to 13.42)  | 10.76<br>(8.71 to 13.37)  | 10.52<br>(8.49 to 13.09)  | 10.23<br>(8.32 to 12.73)  | 9.86<br>(8.01 to 12.29)   | 9.72<br>(7.91 to 12.16)   | 9.62<br>(7.82 to 12.07)  |
| Bermuda                     | 8.41<br>(7.99 to 8.85)    | 8.25<br>(7.96 to 8.56)    | 7.93<br>(7.72 to 8.15)    | 7.46<br>(7.3 to 7.63)     | 6.84<br>(6.68 to 6.99)    | 6.44<br>(6.3 to 6.59)     | 6.09<br>(5.96 to 6.34)    | 6.16<br>(6.01 to 6.34)    | 6.07<br>(5.84 to 6.31)    | 6<br>(5.69 to 6.33)       | 5.87<br>(5.48 to 6.3)    |
| Cuba                        | 12.13<br>(11.78 to 12.51) | 11.75<br>(11.4 to 12.09)  | 11.21<br>(10.84 to 11.58) | 10.36<br>(9.99 to 10.71)  | 9.75<br>(9.39 to 10.14)   | 9.79<br>(9.45 to 10.28)   | 9.96<br>(9.45 to 10.56)   | 10.18<br>(9.28 to 11.15)  | 10.35<br>(8.77 to 12.09)  | 10.39<br>(8.26 to 12.99)  | 10.36<br>(7.61 to 13.84) |
| Dominica                    | 12.95<br>(10.42 to 15.81) | 12.79<br>(10.29 to 15.62) | 13.2<br>(10.68 to 16.14)  | 13.26<br>(10.72 to 16.38) | 14.33<br>(11.59 to 17.7)  | 14.61<br>(11.82 to 18.16) | 14.97<br>(12.09 to 18.64) | 15.3<br>(12.44 to 19.04)  | 15.53<br>(12.74 to 19.36) | 15.61<br>(12.71 to 19.54) | 15.1<br>(12.28 to        |

Appendix Table 17D. Stillbirth rates (per 1,000 live births) by location, 2006-2016

|                                               | 2006                      | 2007                      | 2008                      | 2009                      | 2010                      | 2011                      | 2012                      | 2013                      | 2014                      | 2015                      | 2016                      |
|-----------------------------------------------|---------------------------|---------------------------|---------------------------|---------------------------|---------------------------|---------------------------|---------------------------|---------------------------|---------------------------|---------------------------|---------------------------|
| <b>Southeast Asia, East Asia, and Oceania</b> | 10.25<br>(9.77 to 10.76)  | 9.84<br>(9.4 to 10.32)    | 9.44<br>(9.03 to 9.89)    | 9.03<br>(8.64 to 9.45)    | 8.63<br>(8.27 to 9.02)    | 8.23<br>(7.89 to 8.59)    | 7.87<br>(7.55 to 8.21)    | 7.55<br>(7.26 to 7.88)    | 7.27<br>(6.99 to 7.59)    | 6.99<br>(6.73 to 7.31)    | 6.68<br>(6.43 to 6.98)    |
| <b>East Asia</b>                              | 9.49<br>(8.78 to 10.25)   | 9.04<br>(8.36 to 9.74)    | 8.6<br>(7.95 to 9.28)     | 8.14<br>(7.54 to 8.76)    | 7.69<br>(7.13 to 8.26)    | 7.23<br>(6.71 to 7.76)    | 6.83<br>(6.34 to 7.32)    | 6.47<br>(6.01 to 6.95)    | 6.18<br>(5.74 to 6.65)    | 5.89<br>(5.48 to 6.34)    | 5.57<br>(5.16 to 6.01)    |
| <b>China</b>                                  | 9.6<br>(8.9 to 10.38)     | 9.13<br>(8.43 to 9.85)    | 8.68<br>(8.01 to 9.37)    | 8.19<br>(7.57 to 8.83)    | 7.72<br>(7.14 to 8.31)    | 7.25<br>(6.7 to 7.8)      | 6.83<br>(6.32 to 7.34)    | 6.46<br>(5.98 to 6.96)    | 6.16<br>(5.7 to 6.64)     | 5.85<br>(5.42 to 6.32)    | 5.52<br>(5.09 to 5.98)    |
| <b>North Korea</b>                            | 8.38<br>(7.23 to 9.61)    | 8.22<br>(7.1 to 9.43)     | 8.1<br>(7.04 to 9.3)      | 7.98<br>(6.93 to 9.18)    | 7.86<br>(6.81 to 9.09)    | 7.75<br>(6.71 to 9.01)    | 7.64<br>(6.63 to 8.9)     | 7.54<br>(6.54 to 8.75)    | 7.38<br>(6.42 to 8.63)    | 7.24<br>(6.3 to 8.44)     | 6.99<br>(6.08 to 8.18)    |
| <b>Taiwan (Province of China)</b>             | 5.37<br>(5.08 to 5.71)    | 5.28<br>(5 to 5.61)       | 5.15<br>(4.88 to 5.45)    | 4.83<br>(4.58 to 5.11)    | 4.56<br>(4.33 to 4.83)    | 4.57<br>(4.34 to 4.85)    | 4.45<br>(4.21 to 4.7)     | 4.15<br>(3.93 to 4.38)    | 4.04<br>(3.83 to 4.26)    | 4.02<br>(3.82 to 4.24)    | 3.98<br>(3.77 to 4.22)    |
| <b>Southeast Asia</b>                         | 10.72<br>(10.42 to 11.02) | 10.34<br>(10.05 to 10.62) | 10.01<br>(9.72 to 10.28)  | 9.69<br>(9.42 to 9.96)    | 9.38<br>(9.12 to 9.64)    | 9.04<br>(8.8 to 9.3)      | 8.72<br>(8.48 to 8.98)    | 8.43<br>(8.21 to 8.65)    | 8.15<br>(7.94 to 8.38)    | 7.88<br>(7.67 to 8.1)     | 7.55<br>(7.35 to 7.77)    |
| <b>Cambodia</b>                               | 17.62<br>(17.1 to 18.13)  | 16.54<br>(16.05 to 17.02) | 15.56<br>(15.09 to 16.01) | 14.73<br>(14.3 to 15.16)  | 14.73<br>(13.57 to 16.4)  | 13.28<br>(12.95 to 13.69) | 12.69<br>(12.32 to 13.09) | 12.15<br>(11.79 to 12.53) | 11.7<br>(11.37 to 12.07)  | 11.3<br>(10.98 to 11.66)  | 10.99<br>(10.49 to 11.15) |
| <b>Indonesia</b>                              | 12.14<br>(11.8 to 12.47)  | 11.76<br>(11.43 to 12.07) | 11.4<br>(11.08 to 11.7)   | 11.05<br>(10.75 to 11.35) | 10.72<br>(10.43 to 11.02) | 10.33<br>(10.05 to 10.62) | 9.97<br>(9.7 to 10.26)    | 9.65<br>(9.39 to 9.94)    | 9.35<br>(9.1 to 9.62)     | 9.06<br>(8.82 to 9.33)    | 8.7<br>(8.47 to 8.97)     |
| <b>Laos</b>                                   | 27.36<br>(26.9 to 27.79)  | 25.9<br>(25.47 to 26.32)  | 24.45<br>(24.04 to 24.84) | 23.03<br>(22.64 to 23.4)  | 21.67<br>(21.3 to 22.03)  | 20.43<br>(20.08 to 20.77) | 19.31<br>(18.99 to 19.65) | 18.31<br>(18.2 to 18.63)  | 17.39<br>(17.11 to 17.7)  | 16.56<br>(16.29 to 16.86) | 15.75<br>(15.5 to 16.04)  |
| <b>Malaysia</b>                               | 4.08<br>(3.95 to 4.2)     | 4.01<br>(3.9 to 4.12)     | 3.97<br>(3.88 to 4.05)    | 4.03<br>(3.97 to 4.09)    | 4<br>(3.95 to 4.05)       | 3.95<br>(3.89 to 4.03)    | 3.93<br>(3.82 to 4.04)    | 3.84<br>(3.69 to 4.01)    | 3.74<br>(3.54 to 3.95)    | 3.63<br>(3.39 to 3.88)    | 3.46<br>(3.19 to 3.75)    |
| <b>Maldives</b>                               | 8.54<br>(8 to 9.08)       | 7.98<br>(7.46 to 8.45)    | 7.45<br>(7 to 7.89)       | 6.98<br>(6.58 to 7.42)    | 6.55<br>(6.1 to 7.01)     | 6.16<br>(5.71 to 6.65)    | 5.86<br>(5.38 to 6.39)    | 5.56<br>(5.05 to 6.13)    | 5.3<br>(4.75 to 5.89)     | 5.06<br>(4.49 to 5.69)    | 4.76<br>(4.19 to 5.39)    |
| <b>Mauritius</b>                              | 9.39<br>(8.94 to 9.87)    | 9.23<br>(8.77 to 9.7)     | 9.05<br>(8.6 to 9.53)     | 8.86<br>(8.39 to 9.35)    | 8.71<br>(8.22 to 9.24)    | 8.54<br>(8 to 9.1)        | 8.4<br>(7.85 to 8.98)     | 8.26<br>(7.71 to 8.86)    | 8.1<br>(7.52 to 8.72)     | 7.91<br>(7.31 to 8.57)    | 7.73<br>(7.1 to 8.41)     |
| <b>Myanmar</b>                                | 13.86<br>(13.68 to 14.03) | 13.01<br>(12.84 to 13.17) | 12.25<br>(12.09 to 12.41) | 11.46<br>(11.31 to 11.61) | 10.71<br>(10.55 to 10.82) | 10.11<br>(9.96 to 10.25)  | 9.54<br>(9.41 to 9.66)    | 9.03<br>(8.91 to 9.15)    | 8.54<br>(8.44 to 8.66)    | 8.12<br>(8.01 to 8.23)    | 7.61<br>(7.51 to 7.72)    |
| <b>Philippines</b>                            | 8.77<br>(8.62 to 8.91)    | 8.66<br>(8.52 to 8.8)     | 8.53<br>(8.39 to 8.66)    | 8.41<br>(8.28 to 8.55)    | 8.26<br>(8.12 to 8.39)    | 8.08<br>(7.95 to 8.22)    | 7.94<br>(7.81 to 8.07)    | 7.77<br>(7.64 to 7.9)     | 7.56<br>(7.44 to 7.69)    | 7.35<br>(7.24 to 7.48)    | 7.12<br>(6.98 to 7.23)    |
| <b>Sri Lanka</b>                              | 5.76<br>(5.51 to 6)       | 4.79<br>(4.59 to 4.99)    | 4.85<br>(4.64 to 5.06)    | 5.06<br>(4.85 to 5.3)     | 5.13<br>(4.91 to 5.38)    | 4.92<br>(4.7 to 5.16)     | 4.63<br>(4.42 to 4.87)    | 4.36<br>(4.15 to 4.58)    | 4.11<br>(3.92 to 4.32)    | 3.91<br>(3.72 to 4.12)    | 3.66<br>(3.48 to 3.86)    |
| <b>Seychelles</b>                             | 7.57<br>(7.03 to 8.15)    | 7.49<br>(6.95 to 8.07)    | 7.49<br>(6.95 to 8.1)     | 7.5<br>(6.92 to 8.11)     | 7.46<br>(6.9 to 8.07)     | 7.44<br>(6.87 to 8.05)    | 7.4<br>(6.89 to 8.05)     | 7.38<br>(6.91 to 8.07)    | 7.38<br>(6.83 to 8.04)    | 7.38<br>(6.64 to 8.4)     | 7.38<br>(6.27 to 8.42)    |
| <b>Thailand</b>                               | 4.64<br>(4.23 to 5.08)    | 4.47<br>(4.08 to 4.9)     | 4.32<br>(3.95 to 4.74)    | 4.19<br>(3.82 to 4.59)    | 4.06<br>(3.7 to 4.44)     | 3.96<br>(3.61 to 4.32)    | 3.86<br>(3.53 to 4.23)    | 3.78<br>(3.44 to 4.15)    | 3.71<br>(3.38 to 4.07)    | 3.62<br>(3.3 to 3.98)     | 3.47<br>(3.15 to 3.82)    |
| <b>Timor-Leste</b>                            | 19.81<br>(19.63 to 19.97) | 18.83<br>(18.66 to 18.99) | 17.88<br>(17.72 to 18.03) | 17.16<br>(17.01 to 17.3)  | 16.38<br>(16.24 to 16.52) | 15.59<br>(15.46 to 15.73) | 14.8<br>(14.67 to 14.93)  | 14.18<br>(14.06 to 14.31) | 13.54<br>(13.71 to 13.95) | 13.14<br>(13.43 to 13.72) | 13.1<br>(12.99 to 13.22)  |
| <b>Vietnam</b>                                | 9.19<br>(8.01 to 9.73)    | 8.87<br>(8.1 to 9.4)      | 8.58<br>(8.01 to 8.8)     | 8.29<br>(7.51 to 8.47)    | 7.97<br>(7.18 to 8.8)     | 7.65<br>(6.88 to 8.43)    | 7.31<br>(6.58 to 8.08)    | 6.98<br>(6.29 to 7.7)     | 6.68<br>(6.31 to 7.12)    | 6.3<br>(6.2 to 6.48)      | 6.06<br>(5.72 to 6.48)    |
| <b>Oceania</b>                                | 28.32<br>(25.93 to 30.88) | 28.07<br>(25.67 to 30.61) | 27.72<br>(24.5 to 29.2)   | 27.49<br>(22.71 to 27.12) | 23.38<br>(21.38 to 25.67) | 22.29<br>(20.4 to 24.48)  | 21.4<br>(19.66 to 23.48)  | 20.64<br>(18.98 to 22.66) | 19.94<br>(18.35 to 21.96) | 19.27<br>(17.77 to 21.15) | 18.59<br>(17.11 to 20.42) |
| <b>American Samoa</b>                         | 6.79<br>(6.21 to 7.41)    | 6.63<br>(6.05 to 7.24)    | 6.24<br>(5.71 to 6.83)    | 5.74<br>(5.25 to 6.29)    | 5.37<br>(4.9 to 5.91)     | 5.1<br>(4.67 to 5.62)     | 4.91<br>(4.5 to 5.4)      | 4.79<br>(4.4 to 5.26)     | 4.72<br>(4.28 to 5.21)    | 4.64<br>(4.13 to 4.94)    | 4.49<br>(4.13 to 4.94)    |
| <b>Federated States of Micronesia</b>         | 11.96<br>(10.94 to 13.06) | 11.84<br>(10.82 to 12.93) | 11.31<br>(10.36 to 12.38) | 10.54<br>(9.64 to 11.54)  | 9.96<br>(9.09 to 10.96)   | 9.56<br>(8.74 to 10.53)   | 9.26<br>(8.48 to 10.18)   | 9.01<br>(8.27 to 9.9)     | 8.87<br>(8.17 to 9.75)    | 8.57<br>(7.9 to 9.42)     | 8.16<br>(7.5 to 8.98)     |
| <b>Fiji</b>                                   | 12.86<br>(12.48 to 13.22) | 12.87<br>(12.49 to 13.23) | 12.88<br>(12.49 to 13.24) | 12.94<br>(12.57 to 13.31) | 12.85<br>(12.49 to 13.24) | 12.8<br>(12.43 to 13.18)  | 12.73<br>(12.36 to 13.12) | 12.59<br>(12.23 to 12.99) | 12.48<br>(12.13 to 12.87) | 12.36<br>(12.01 to 12.75) | 12.29<br>(11.95 to 12.7)  |
| <b>Guam</b>                                   | 10.05<br>(9.73 to 10.39)  | 10.2<br>(9.87 to 10.55)   | 10.35<br>(10.01 to 10.71) | 10.49<br>(10.14 to 10.86) | 10.6<br>(10.24 to 10.98)  | 10.61<br>(10.27 to 11.1)  | 10.61<br>(10.26 to 10.99) | 10.59<br>(10.24 to 10.98) | 10.61<br>(10.25 to 11.1)  | 10.42<br>(10.07 to 10.81) | 9.93<br>(9.6 to 10.31)    |
| <b>Kiribati</b>                               | 24.92<br>(22.78 to 27.21) | 24.76<br>(22.62 to 27.03) | 23.66<br>(21.67 to 25.89) | 22.04<br>(20.15 to 24.15) | 20.94<br>(19.1 to 23.03)  | 20.2<br>(18.47 to 22.23)  | 19.39<br>(17.75 to 21.31) | 18.67<br>(17.14 to 20.52) | 18.02<br>(16.6 to 19.82)  | 17.39<br>(16.02 to 19.11) | 16.73<br>(15.37 to 18.4)  |
| <b>Marshall Islands</b>                       | 13.43<br>(12.52 to 14.95) | 13.43<br>(12.27 to 14.67) | 13.43<br>(11.64 to 13.91) | 12.71<br>(10.73 to 12.86) | 11.65<br>(10.09 to 12.16) | 10.55<br>(9.64 to 11.61)  | 10.17<br>(9.31 to 11.18)  | 9.83<br>(9.02 to 10.8)    | 9.36<br>(8.85 to 10.56)   | 8.99<br>(8.62 to 10.29)   | 8.99<br>(8.26 to 9.89)    |
| <b>Northern Mariana Islands</b>               | 3.46<br>(3.17 to 3.76)    | 3.13<br>(2.86 to 3.39)    | 2.79<br>(2.56 to 3.03)    | 2.5<br>(2.29 to 2.72)     | 2.28<br>(2.09 to 2.49)    | 2.22<br>(2.03 to 2.43)    | 2.3<br>(2.1 to 2.51)      | 2.35<br>(2.15 to 2.57)    | 2.4<br>(2.21 to 2.63)     | 2.4<br>(2.2 to 2.64)      | 2.36<br>(2.17 to 2.59)    |
| <b>Papua New Guinea</b>                       | 32.33<br>(29.56 to 35.31) | 31.99<br>(29.22 to 34.95) | 30.38<br>(27.83 to 33.26) | 28.08<br>(25.69 to 30.77) | 26.4<br>(24.1 to 29.03)   | 25.07<br>(22.92 to 27.59) | 23.99<br>(22 to 26.38)    | 23.07<br>(21.17 to 25.35) | 22.2<br>(20.4 to 24.48)   | 21.36<br>(19.67 to 23.49) | 20.57<br>(18.9 to 22.63)  |
| <b>Samoa</b>                                  | 7.64<br>(6.98 to 8.34)    | 7.68<br>(7.02 to 8.39)    | 7.15<br>(6.55 to 7.83)    | 6.59<br>(6.03 to 7.22)    | 6.19<br>(5.65 to 6.81)    | 5.89<br>(5.38 to 6.48)    | 5.67<br>(5.2 to 6.24)     | 5.5<br>(5.05 to 6.04)     | 5.37<br>(4.93 to 5.92)    | 5.24<br>(4.83 to 5.76)    | 5.01<br>(4.6 to 5.51)     |
| <b>Solomon Islands</b>                        | 17.87<br>(16.34 to 19.51) | 17.74<br>(16.2 to 19.37)  | 16.87<br>(15.45 to 18.46) | 15.71<br>(14.37 to 17.21) | 14.85<br>(13.59 to 16.33) | 14.17<br>(12.95 to 15.59) | 13.61<br>(12.48 to 14.97) | 13.13<br>(12.05 to 14.43) | 12.72<br>(11.69 to 14.03) | 12.37<br>(11.39 to 13.6)  | 11.96<br>(10.99 to 13.16) |
| <b>Tonga</b>                                  | 11.96<br>(10.85 to 12.95) | 11.9<br>(10.87 to 13)     | 11.56<br>(10.58 to 12.65) | 10.82<br>(9.89 to 11.85)  | 10.33<br>(9.43 to 11.36)  | 9.93<br>(9.07 to 10.92)   | 9.6<br>(8.8 to 10.56)     | 9.35<br>(8.58 to 10.27)   | 9.13<br>(8.39 to 10.17)   | 8.88<br>(8.18 to 9.77)    | 8.65<br>(7.95 to 9.52)    |
| <b>Vanuatu</b>                                | 17.19<br>(17.19 to 20.53) | 17.43<br>(17.03 to 20.37) | 17.14<br>(16.26 to 19.43) | 16.85<br>(15.09 to 18.08) | 16.56<br>(14.21 to 17.12) | 15.56<br>(13.59 to 16.95) | 14.86<br>(13.16 to 15.78) | 14.35<br>(12.78 to 15.21) | 13.58<br>(12.48 to 14.98) | 12.99<br>(12.24 to 14.61) | 12.99<br>(11.88 to 14.22) |
| <b>North Africa and Middle East</b>           | 14.44<br>(13.2 to 15.78)  | 13.94<br>(12.74 to 15.24) | 13.47<br>(12.29 to 14.75) | 13.04<br>(11.94 to 14.3)  | 12.62<br>(11.57 to 13.82) | 12.22<br>(11.18 to 13.43) | 11.85<br>(10.86 to 13.05) | 11.51<br>(10.57 to 12.7)  | 11.17<br>(10.26 to 12.3)  | 10.84<br>(9.96 to 11.96)  | 10.41<br>(9.55 to 11.48)  |
| <b>Afghanistan</b>                            | 23.52<br>(20.53 to 26.89) | 22.61<br>(19.7 to 25.91)  | 21.8<br>(19.03 to 24.99)  | 20.85<br>(18.23 to 23.91) | 19.91<br>(17.4 to 22.84)  | 19.14<br>(16.69 to 21.93) | 18.31<br>(15.95 to 21.07) | 17.56<br>(15.3 to 20.19)  | 16.9<br>(14.78 to 19.4)   | 16.31<br>(14.2 to 18.77)  | 15.69<br>(13.62 to 18.1)  |
| <b>Algeria</b>                                | 20.71<br>(18.87 to 22.62) | 19.75<br>(18.19 to 21.51) | 18.72<br>(17.48 to 20.05) | 17.64<br>(16.62 to 18.74) | 16.45<br>(15.68 to 17.26) | 15.2<br>(14.81 to 15.61)  | 14.31<br>(14.06 to 14.56) | 13.87<br>(13.46 to 14.29) | 13.6<br>(12.78 to 14.49)  | 12.89<br>(11.75 to 14.09) | 12.17<br>(10.86 to 13.62) |
| <b>Bahrain</b>                                | 6.82<br>(6.7 to 6.94)     | 6.61<br>(6.49 to 6.72)    | 6.4<br>(6.29 to 6.51)     | 6.18<br>(6.08 to 6.29)    | 5.85<br>(5.75 to 5.95)    | 5.55<br>(5.45 to 5.65)    | 5.54<br>(5.44 to 5.64)    | 5.46<br>(5.37 to 5.56)    | 5.38<br>(5.29 to 5.48)    | 5.28<br>(5.19 to 5.37)    | 5.12<br>(5.03 to 5.22)    |
| <b>Egypt</b>                                  | 13.88<br>(11.74 to 16.16) | 13.46<br>(11.44 to 15.74) | 12.96<br>(10.97 to 15.14) | 12.85<br>(10.58 to 14.69) | 12.85<br>(10.16 to 14.15) | 12.86<br>(9.67 to 13.47)  | 12.86<br>(9.19 to 12.82)  | 12.86<br>(8.82 to 12.27)  | 12.86<br>(8.49 to 11.85)  | 12.86<br>(8.16 to 11.37)  | 12.86<br>(7.77 to 10.86)  |
| <b>Iran</b>                                   | 9.18<br>(9.06 to 9.29)    | 8.89<br>(8.75 to 9.03)    | 8.63<br>(8.44 to 8.81)    | 8.41<br>(8.18 to 8.64)    | 8.21<br>(7.92 to 8.51)    | 8.01<br>(7.65 to 8.36)    | 7.86<br>(7.44 to 8.29)    | 7.73<br>(7.28 to 8.21)    | 7.62<br>(7.1 to 8.15)     | 7.48<br>(6.94 to 8.04)    | 7.18<br>(6.63 to 7.78)    |
| <b>Iraq</b>                                   | 13.89<br>(11.76 to 16.22) | 13.75<br>(11.64 to 16.06) | 13.56<br>(11.53 to 15.86) | 13.35<br>(11.33 to 15.73) | 13.15<br>(11.15 to 15.46) | 12.5<br>(10.9 to 15.18)   | 12.5<br>(10.61 to 14.82)  | 12.16<br>(10.37 to 14.4)  | 11.81<br>(10.14 to 14.11) | 11.31<br>(9.94 to 13.86)  | 10.81<br>(9.65 to 13.49)  |
| <b>Jordan</b>                                 | 8.26<br>(7.58 to 8.95)    | 8.07<br>(7.41 to 8.74)    | 7.88<br>(7.22 to 8.54)    | 7.69<br>(7.06 to 8.34)    | 7.48<br>(6.88 to 8.14)    | 7.32<br>(6.73 to 7.98)    | 7.18<br>(6.59 to 7.83)    | 7.01<br>(6.44 to 7.66)    | 6.86<br>(6.32 to 7.49)    | 6.71<br>(6.17 to 7.34)    | 6.55<br>(6.03 to 7.18)    |
| <b>Kuwait</b>                                 | 7.02<br>(6.57 to 7.43)    | 6.76<br>(6.29 to 7.2)     | 6.77<br>(6.27 to 7.25)    | 6.71<br>(6.54 to 7.68)    | 6.43<br>(5.87 to 7.01)    | 6.3<br>(5.32 to 6.44)     | 6.3<br>(5.1 to 6.66)      | 6.27<br>(5.1 to 6.49)     | 6.27<br>(5.05 to 6.54)    | 6.27<br>(4.89 to 6.46)    | 6.27<br>(4.68 to 6.82)    |
| <b>Lebanon</b>                                | 8.17<br>(7.89 to 8.44)    | 7.9<br>(7.68 to 8.14)     | 7.65<br>(7.48 to 7.84)    | 7.4<br>(7.27 to 7.54)     | 7.17<br>(7.09 to 7.25)    | 6.96<br>(6.91 to 7.01)    | 6.67<br>(6.63 to 6.7)     | 6.36<br>(6.35 to 6.59)    | 6.31<br>(6.16 to 6.46)    | 6.13<br>(5.97 to 6.31)    | 5.91<br>(5.69 to 6.06)    |
| <b>Libya</b>                                  | 7.75<br>(6.56 to 9.05)    | 7.44<br>(6.3 to 8.69)     | 7.16<br>(6.08 to 8.37)    | 6.74<br>(5.72 to 7.94)    | 6.32<br>(5.33 to 7.44)    | 6.15<br>(5.23 to 7.28)    | 5.83<br>(4.94 to 6.91)    | 5.56<br>(4.74 to 6.58)    | 5.31<br>(4.58 to 6.38)    | 5.2<br>(4.44 to 6.19)     | 4.91<br>(4.19 to 5.86)    |
| <b>Morocco</b>                                |                           |                           |                           |                           |                           |                           |                           |                           |                           |                           |                           |

Appendix Table 17D. Stillbirth rates (per 1,000 live births) by location, 2006-2016

|                             | 2006                      | 2007                      | 2008                      | 2009                      | 2010                      | 2011                      | 2012                      | 2013                      | 2014                      | 2015                      | 2016                      |
|-----------------------------|---------------------------|---------------------------|---------------------------|---------------------------|---------------------------|---------------------------|---------------------------|---------------------------|---------------------------|---------------------------|---------------------------|
| Nepal                       | 26.39<br>(25.72 to 27.06) | 25.47<br>(24.85 to 26.07) | 24.39<br>(23.83 to 24.93) | 23.23<br>(22.71 to 23.72) | 22.01<br>(21.51 to 22.5)  | 20.77<br>(20.29 to 21.26) | 19.53<br>(19.02 to 20.03) | 18.36<br>(17.83 to 18.87) | 17.28<br>(16.73 to 17.82) | 16.29<br>(15.73 to 16.83) | 15.19<br>(14.65 to 15.76) |
| Pakistan                    | 37.27<br>(36.1 to 38.48)  | 36.5<br>(35.35 to 37.71)  | 35.72<br>(34.61 to 36.9)  | 34.79<br>(33.73 to 35.94) | 33.78<br>(32.75 to 34.89) | 32.64<br>(31.63 to 33.71) | 31.42<br>(30.43 to 32.48) | 30.03<br>(29.08 to 31.04) | 28.67<br>(27.79 to 29.63) | 27.31<br>(26.44 to 28.24) | 25.89<br>(25.06 to 26.78) |
| Sub-Saharan Africa          | 29.73<br>(27.93 to 31.72) | 28.95<br>(27.19 to 30.86) | 28.2<br>(26.56 to 30.02)  | 27.47<br>(25.88 to 29.2)  | 26.7<br>(25.13 to 28.31)  | 25.79<br>(24.36 to 27.35) | 24.95<br>(23.61 to 26.48) | 24.13<br>(22.88 to 25.63) | 23.28<br>(22.08 to 24.73) | 22.34<br>(21.18 to 23.73) | 21.33<br>(20.25 to 22.64) |
| Southern Sub-Saharan Africa | 16.63<br>(15.19 to 18.28) | 16.91<br>(15.43 to 18.6)  | 17.15<br>(15.61 to 18.91) | 17.06<br>(15.51 to 18.87) | 16.66<br>(15.13 to 18.5)  | 16.66<br>(14.6 to 18.02)  | 15.52<br>(13.99 to 17.31) | 15.13<br>(13.65 to 16.86) | 14.74<br>(13.31 to 16.44) | 14.18<br>(12.84 to 15.84) | 13.82<br>(12.54 to 15.45) |
| Botswana                    | 10.99<br>(9.37 to 12.8)   | 10.57<br>(9.02 to 12.31)  | 9.88<br>(8.45 to 11.53)   | 9.39<br>(8.08 to 10.94)   | 8.94<br>(7.67 to 10.41)   | 8.94<br>(7.11 to 9.66)    | 7.6<br>(6.5 to 8.88)      | 6.87<br>(5.89 to 8.05)    | 6.38<br>(5.48 to 7.46)    | 6.05<br>(5.17 to 7.09)    | 5.8<br>(4.95 to 6.81)     |
| Lesotho                     | 25.78<br>(23.61 to 28.32) | 25.02<br>(22.91 to 27.43) | 24.56<br>(22.46 to 26.95) | 23.41<br>(21.39 to 25.68) | 22.2<br>(20.25 to 24.38)  | 20.19<br>(18.46 to 22.2)  | 18.37<br>(17.26 to 20.76) | 17.39<br>(16.15 to 20.59) | 16.39<br>(15.44 to 19.19) | 15.36<br>(14.64 to 18.04) | 14.33<br>(13.82 to 18.74) |
| Namibia                     | 11.97<br>(9.86 to 14.28)  | 11.69<br>(9.63 to 13.95)  | 11.51<br>(9.49 to 13.75)  | 11.51<br>(9.62 to 14.7)   | 11.46<br>(9.62 to 14.78)  | 11.46<br>(9.87 to 13.2)   | 10.94<br>(8.58 to 12.66)  | 10.24<br>(8.41 to 12.41)  | 9.69<br>(8.01 to 11.77)   | 9.1<br>(7.53 to 11.13)    | 8.83<br>(7.32 to 10.86)   |
| South Africa                | 12.09<br>(11.28 to 12.91) | 12.14<br>(11.3 to 12.92)  | 12.13<br>(11.28 to 12.94) | 11.88<br>(11.04 to 12.73) | 11.38<br>(10.61 to 12.21) | 10.93<br>(10.13 to 11.77) | 10.7<br>(9.83 to 11.54)   | 10.52<br>(9.68 to 11.42)  | 10.39<br>(9.57 to 11.31)  | 10.1<br>(9.25 to 10.99)   | 9.77<br>(8.93 to 10.67)   |
| Swaziland                   | 11.54<br>(9.96 to 13.3)   | 11<br>(9.49 to 12.68)     | 11.07<br>(9.57 to 12.76)  | 10.63<br>(9.19 to 12.2)   | 9.99<br>(8.61 to 11.44)   | 9.36<br>(8.05 to 10.79)   | 8.93<br>(7.68 to 10.33)   | 8.68<br>(7.48 to 10.04)   | 8.56<br>(7.37 to 9.94)    | 7.96<br>(6.85 to 9.26)    | 7.84<br>(6.73 to 9.12)    |
| Zimbabwe                    | 27.81<br>(23.79 to 33.1)  | 28.58<br>(24.37 to 33.4)  | 29.24<br>(24.92 to 34.24) | 29.25<br>(24.9 to 34.51)  | 28.78<br>(24.5 to 33.71)  | 27.91<br>(23.71 to 32.89) | 26.46<br>(22.44 to 31.48) | 25.54<br>(21.59 to 30.55) | 24.67<br>(20.86 to 29.44) | 23.66<br>(20.01 to 28.29) | 23.12<br>(19.55 to 27.81) |
| Western Sub-Saharan Africa  | 36.22<br>(32.99 to 39.87) | 35.17<br>(32.06 to 38.63) | 34.2<br>(31.16 to 37.53)  | 33.28<br>(30.35 to 36.48) | 32.3<br>(29.6 to 35.33)   | 31.3<br>(28.72 to 34.17)  | 30.4<br>(27.86 to 33.12)  | 29.52<br>(27.12 to 32.17) | 28.69<br>(26.35 to 31.33) | 27.41<br>(25.25 to 29.94) | 26.06<br>(23.95 to 28.47) |
| Benin                       | 21.38<br>(20.7 to 22.07)  | 20.81<br>(20.26 to 21.39) | 20.24<br>(19.78 to 20.7)  | 19.68<br>(19.35 to 20.04) | 19.16<br>(18.88 to 19.45) | 18.65<br>(18.39 to 18.91) | 18.16<br>(17.88 to 18.43) | 17.61<br>(17.3 to 17.95)  | 17<br>(16.64 to 17.39)    | 16.39<br>(15.96 to 16.82) | 15.68<br>(15.21 to 16.17) |
| Burkina Faso                | 17.88<br>(17.22 to 18.58) | 17.32<br>(16.79 to 17.88) | 16.79<br>(16.38 to 17.22) | 16.27<br>(15.96 to 16.59) | 15.77<br>(15.46 to 15.98) | 15.28<br>(15.14 to 15.42) | 14.8<br>(14.66 to 14.93)  | 14.37<br>(14.19 to 14.57) | 13.95<br>(13.7 to 14.21)  | 13.56<br>(13.23 to 13.89) | 13.13<br>(12.74 to 13.52) |
| Cameroon                    | 22.14<br>(20.63 to 23.75) | 21.65<br>(20.19 to 23.27) | 21.15<br>(19.75 to 22.76) | 20.71<br>(19.36 to 22.32) | 20.16<br>(18.83 to 21.71) | 19.68<br>(18.32 to 21.16) | 19.24<br>(17.92 to 20.67) | 18.69<br>(17.44 to 20.15) | 18.16<br>(16.99 to 19.56) | 17.59<br>(16.47 to 18.93) | 17.07<br>(15.96 to 18.41) |
| Cape Verde                  | 11.68<br>(10.11 to 13.44) | 11.15<br>(9.55 to 12.83)  | 10.62<br>(9.06 to 12.26)  | 10.15<br>(8.71 to 11.71)  | 9.69<br>(8.35 to 11.21)   | 9.21<br>(7.92 to 10.67)   | 9.04<br>(7.79 to 10.46)   | 8.67<br>(7.47 to 10.05)   | 8.28<br>(7.11 to 9.63)    | 7.88<br>(6.79 to 9.15)    | 7.43<br>(6.39 to 8.65)    |
| Chad                        | 37.76<br>(36.54 to 38.94) | 36.68<br>(35.51 to 37.83) | 35.7<br>(34.54 to 36.83)  | 34.85<br>(33.75 to 35.96) | 33.77<br>(32.7 to 34.89)  | 32.87<br>(31.83 to 33.97) | 32<br>(30.97 to 33.08)    | 31.08<br>(30.09 to 32.14) | 30.27<br>(29.35 to 31.31) | 29.52<br>(28.6 to 30.55)  | 28.59<br>(27.72 to 29.62) |
| Cote d'Ivoire               | 26.24<br>(25.59 to 26.87) | 25.67<br>(25.03 to 26.28) | 25.02<br>(24.4 to 25.63)  | 24.36<br>(23.77 to 24.96) | 23.61<br>(23.03 to 24.2)  | 23.24<br>(22.48 to 23.63) | 22.4<br>(21.85 to 22.98)  | 21.64<br>(21.11 to 22.21) | 20.89<br>(20.4 to 21.44)  | 20.15<br>(19.66 to 20.68) | 19.37<br>(18.82 to 19.82) |
| The Gambia                  | 27.98<br>(27.1 to 28.84)  | 27.25<br>(26.39 to 28.08) | 26.47<br>(25.63 to 27.29) | 25.73<br>(24.93 to 26.54) | 24.92<br>(24.16 to 25.73) | 24.28<br>(23.53 to 25.08) | 23.59<br>(22.86 to 24.38) | 22.97<br>(22.25 to 23.74) | 22.4<br>(21.73 to 23.15)  | 21.75<br>(21.09 to 22.49) | 21.02<br>(20.36 to 21.76) |
| Ghana                       | 22.27<br>(20.81 to 23.89) | 21.79<br>(20.31 to 23.51) | 21.17<br>(19.64 to 22.95) | 20.66<br>(19.09 to 22.46) | 20.07<br>(18.5 to 21.89)  | 19.19<br>(17.59 to 21.07) | 18.21<br>(16.61 to 19.99) | 17.47<br>(15.89 to 19.5)  | 16.8<br>(15.25 to 18.59)  | 16.15<br>(14.64 to 18.04) | 15.37<br>(13.89 to 17.18) |
| Guinea                      | 25.46<br>(22.65 to 24.26) | 22.78<br>(21.99 to 23.54) | 22.05<br>(21.28 to 22.8)  | 21.42<br>(20.7 to 22.17)  | 20.76<br>(20.05 to 21.5)  | 20.06<br>(19.37 to 20.78) | 19.41<br>(18.75 to 20.12) | 18.75<br>(18.1 to 19.44)  | 18.07<br>(17.48 to 18.74) | 17.45<br>(16.87 to 18.1)  | 16.78<br>(16.23 to 17.43) |
| Guinea-Bissau               | 33.29<br>(31.01 to 35.69) | 31.87<br>(29.66 to 34.19) | 30.46<br>(28.41 to 32.72) | 29.1<br>(27.1 to 31.29)   | 27.8<br>(25.86 to 29.95)  | 26.43<br>(24.62 to 28.51) | 25.2<br>(23.54 to 27.19)  | 24.07<br>(22.53 to 25.98) | 23.04<br>(21.59 to 24.85) | 21.98<br>(20.6 to 23.7)   | 20.88<br>(19.53 to 22.53) |
| Liberia                     | 24.18<br>(22.52 to 25.92) | 23.06<br>(21.46 to 24.74) | 22.08<br>(20.59 to 23.72) | 21.26<br>(19.8 to 22.86)  | 20.49<br>(19.06 to 22.07) | 19.65<br>(18.3 to 21.2)   | 18.82<br>(17.58 to 20.31) | 17.83<br>(16.68 to 19.24) | 16.98<br>(15.91 to 18.31) | 16.19<br>(15.18 to 17.46) | 15.35<br>(14.35 to 16.56) |
| Mali                        | 38.12<br>(35.52 to 40.88) | 37.02<br>(34.52 to 39.79) | 35.97<br>(33.6 to 38.71)  | 34.94<br>(32.66 to 37.66) | 33.94<br>(31.7 to 36.55)  | 32.93<br>(30.67 to 35.42) | 32.13<br>(29.94 to 34.53) | 31.65<br>(29.54 to 34.12) | 30.97<br>(28.99 to 33.36) | 29.94<br>(28.04 to 32.22) | 28.94<br>(27.07 to 31.22) |
| Mauritania                  | 22.38<br>(21.79 to 22.97) | 21.54<br>(20.97 to 22.1)  | 20.68<br>(20.12 to 21.22) | 19.95<br>(19.43 to 20.48) | 19.13<br>(18.63 to 19.65) | 18.39<br>(17.91 to 18.89) | 17.69<br>(17.22 to 18.18) | 17.02<br>(16.57 to 17.5)  | 16.31<br>(15.89 to 16.77) | 15.63<br>(15.23 to 16.08) | 14.93<br>(14.55 to 15.37) |
| Niger                       | 28.37<br>(27.44 to 29.36) | 27.29<br>(26.37 to 28.24) | 26.17<br>(25.31 to 27.1)  | 25.29<br>(24.46 to 26.19) | 24.46<br>(23.65 to 25.34) | 23.73<br>(22.96 to 24.59) | 23<br>(22.25 to 23.83)    | 22.31<br>(21.57 to 23.11) | 21.6<br>(20.89 to 22.4)   | 20.93<br>(20.25 to 21.69) | 20.17<br>(19.53 to 20.93) |
| Nigeria                     | 47.01<br>(41.57 to 53.21) | 45.67<br>(40.39 to 51.51) | 44.54<br>(39.35 to 50.35) | 43.42<br>(38.4 to 49)     | 42.27<br>(37.4 to 47.6)   | 41.06<br>(36.28 to 46.31) | 40.05<br>(35.43 to 45.05) | 39.06<br>(34.48 to 44.01) | 38.16<br>(33.67 to 43.08) | 37.28<br>(32.01 to 41.01) | 36.28<br>(30.21 to 38.99) |
| Sao Tome and Principe       | 12.59<br>(11.73 to 13.5)  | 12.2<br>(11.35 to 13.08)  | 11.83<br>(11.04 to 12.71) | 11.48<br>(10.69 to 12.34) | 11.12<br>(10.35 to 11.99) | 10.78<br>(10.05 to 11.63) | 10.47<br>(9.78 to 11.3)   | 10.18<br>(9.53 to 10.99)  | 9.84<br>(9.22 to 10.62)   | 9.52<br>(8.92 to 10.26)   | 9.1<br>(8.51 to 9.82)     |
| Senegal                     | 21.42<br>(18.31 to 24.83) | 20.57<br>(17.58 to 23.91) | 19.75<br>(16.78 to 22.97) | 18.92<br>(16.01 to 21.94) | 18.15<br>(15.29 to 21.06) | 17.4<br>(14.66 to 20.24)  | 16.69<br>(13.94 to 19.63) | 16.02<br>(13.26 to 18.97) | 15.37<br>(12.74 to 18.33) | 14.8<br>(12.24 to 17.64)  | 14.18<br>(11.72 to 17.04) |
| Sierra Leone                | 37.29<br>(34.73 to 39.98) | 35.92<br>(33.43 to 38.53) | 34.58<br>(32.26 to 37.15) | 33.31<br>(31.02 to 35.81) | 32.04<br>(29.81 to 34.52) | 30.81<br>(28.7 to 33.24)  | 29.44<br>(27.5 to 31.76)  | 28.11<br>(26.11 to 30.12) | 26.59<br>(24.92 to 28.68) | 25.71<br>(24.1 to 27.72)  | 24.82<br>(23.21 to 26.78) |
| Togo                        | 26.33<br>(25.48 to 27.15) | 25.64<br>(24.85 to 26.41) | 24.94<br>(24.21 to 25.67) | 24.22<br>(23.5 to 24.9)   | 23.5<br>(22.84 to 24.15)  | 22.63<br>(21.96 to 23.25) | 21.77<br>(21.08 to 22.42) | 20.92<br>(20.21 to 21.66) | 20.07<br>(19.37 to 20.76) | 19.23<br>(18.54 to 19.9)  | 18.37<br>(17.69 to 19.08) |
| Eastern Sub-Saharan Africa  | 24.14<br>(23.35 to 24.97) | 23.37<br>(22.61 to 24.18) | 22.59<br>(21.85 to 23.35) | 21.87<br>(21.17 to 22.6)  | 21.19<br>(20.52 to 21.91) | 20.43<br>(19.78 to 21.14) | 19.68<br>(19.07 to 20.37) | 18.99<br>(18.4 to 19.66)  | 18.18<br>(17.63 to 18.71) | 17.61<br>(17.09 to 18.21) | 16.92<br>(16.43 to 17.48) |
| Burundi                     | 21.46<br>(21.13 to 21.78) | 20.42<br>(20.11 to 20.72) | 19.62<br>(19.31 to 19.91) | 18.83<br>(18.74 to 19.32) | 18.54<br>(18.26 to 18.83) | 18.21<br>(17.93 to 18.49) | 17.81<br>(17.54 to 18.09) | 17.37<br>(17.1 to 17.65)  | 16.93<br>(16.69 to 17.21) | 16.54<br>(16.29 to 16.8)  | 16.1<br>(15.86 to 16.37)  |
| Comoros                     | 27.74<br>(26.17 to 29.3)  | 26.8<br>(25.29 to 28.3)   | 25.98<br>(24.49 to 27.63) | 25.18<br>(23.78 to 26.63) | 24.36<br>(23.01 to 25.8)  | 23.54<br>(22.23 to 24.94) | 22.67<br>(21.4 to 24.05)  | 21.71<br>(20.5 to 23.05)  | 20.78<br>(19.67 to 22.06) | 19.9<br>(18.81 to 21.13)  | 18.98<br>(17.97 to 20.21) |
| Djibouti                    | 28.54<br>(27.97 to 29.09) | 27.6<br>(27.05 to 28.12)  | 26.65<br>(26.12 to 27.16) | 25.75<br>(25.24 to 26.25) | 24.87<br>(24.39 to 25.37) | 23.99<br>(23.52 to 24.48) | 23.1<br>(22.65 to 23.58)  | 22.27<br>(21.83 to 22.73) | 21.36<br>(20.95 to 21.81) | 20.59<br>(20.19 to 21.02) | 19.39<br>(19.39 to 19.82) |
| Eritrea                     | 18.21<br>(17.18 to 19.24) | 17.79<br>(16.78 to 18.78) | 17.48<br>(16.48 to 18.46) | 17.14<br>(16.19 to 18.13) | 16.8<br>(15.87 to 17.79)  | 16.39<br>(15.48 to 17.36) | 15.94<br>(15.05 to 16.91) | 15.48<br>(14.62 to 16.44) | 14.97<br>(14.17 to 15.89) | 14.53<br>(13.74 to 15.43) | 13.94<br>(13.19 to 14.84) |
| Ethiopia                    | 21.49<br>(20.93 to 22.04) | 20.4<br>(19.86 to 20.92)  | 19.28<br>(18.77 to 19.77) | 18.12<br>(17.66 to 18.59) | 17.19<br>(16.75 to 17.65) | 16.04<br>(15.63 to 16.48) | 14.99<br>(14.6 to 15.4)   | 13.99<br>(13.63 to 14.38) | 12.77<br>(12.45 to 13.12) | 12.29<br>(11.98 to 12.63) | 11.58<br>(11.29 to 11.92) |
| Kenya                       | 26.18<br>(24.72 to 27.75) | 25.26<br>(23.87 to 26.78) | 24.07<br>(22.73 to 25.5)  | 23.3<br>(22.02 to 24.66)  | 22.61<br>(21.37 to 23.92) | 21.7<br>(20.48 to 22.96)  | 20.94<br>(19.8 to 22.15)  | 20.35<br>(19.2 to 21.52)  | 19.33<br>(18.25 to 20.46) | 18.69<br>(17.65 to 19.79) | 18.2<br>(17.17 to 19.3)   |
| Madagascar                  | 23.67<br>(22.33 to 25)    | 23.39<br>(22.07 to 24.7)  | 23.2<br>(21.88 to 24.51)  | 22.25<br>(21.96 to 24.59) | 21.17<br>(21.89 to 24.54) | 20.28<br>(21.54 to 24.16) | 22.31<br>(21.06 to 23.67) | 21.84<br>(20.62 to 23.18) | 21.28<br>(20.14 to 22.6)  | 20.69<br>(19.56 to 21.97) | 20<br>(18.93 to 21.29)    |
| Malawi                      | 21.51<br>(21 to 22.01)    | 21.32<br>(20.81 to 21.81) | 21.03<br>(20.52 to 21.51) | 20.57<br>(20.09 to 21.06) | 20.14<br>(19.67 to 20.63) | 19.45<br>(19 to 19.93)    | 18.61<br>(18.17 to 19.07) | 17.89<br>(17.47 to 18.35) | 17.23<br>(16.84 to 17.67) | 16.5<br>(16.12 to 16.92)  | 15.72<br>(15.36 to 16.14) |
| Mozambique                  | 28.83<br>(27.21 to 30.45) | 27.73<br>(26.21 to 29.33) | 26.78<br>(25.28 to 28.31) | 25.89<br>(24.47 to 27.46) | 24.96<br>(23.61 to 26.52) | 24.13<br>(22.81 to 25.63) | 23.3<br>(22.02 to 24.75)  | 22.42<br>(21.21 to 23.82) | 21.48<br>(20.32 to 22.84) | 20.58<br>(19.46 to 21.89) | 19.59<br>(18.54 to 20.85) |
| Rwanda                      | 18.86<br>(17.55 to 20.26) | 18.18<br>(16.57 to 19.09) | 17.6<br>(15.64 to 17.99)  | 16.76<br>(14.77 to 16.95) | 15.81<br>(14.03 to 16.1)  | 15.05<br>(13.49 to 15.44) | 14.14<br>(13.08 to 14.96) | 13.65<br>(12.75 to 14.61) | 13.37<br>(12.47 to 14.31) | 13.11<br>(12.24 to 14.06) | 12.69<br>(11.83 to 13.64) |
| Somalia                     | 30.28<br>(28.57 to 31.98) |                           |                           |                           |                           |                           |                           |                           |                           |                           |                           |



Appendix Table 18A. Stillbirths (in thousands) by location, 1970-1979

|                                  | 1970                 | 1971                 | 1972                 | 1973                 | 1974                 | 1975                 | 1976                 | 1977                 | 1978                 | 1979                 |
|----------------------------------|----------------------|----------------------|----------------------|----------------------|----------------------|----------------------|----------------------|----------------------|----------------------|----------------------|
| <b>Global</b>                    | 4840 02              | 4746 41              | 4655 73              | 4562 89              | 4480 18              | 4397 48              | 4321 80              | 4253 80              | 4198 60              | 4154 21              |
| (4501 24 to 5487 82)             | (4407 30 to 5330 16) | (4332 47 to 5280 11) | (4269 35 to 5123 21) | (4188 45 to 5012 31) | (4121 25 to 4902 63) | (4053 50 to 4802 79) | (3989 07 to 4706 72) | (3930 07 to 4535 77) | (3888 21 to 4535 24) | (3849 15 to 4487 11) |
| <b>High SDI</b>                  | 141 15               | 145 90               | 148 66               | 152 99               | 157 28               | 162 73               | 168 29               | 174 91               | 181 69               | 188 51               |
| (140 86 to 187 22)               | (134 08 to 177 12)   | (128 61 to 168 87)   | (118 36 to 161 09)   | (108 36 to 151 78)   | (100 12 to 144 80)   | (93 86 to 138 54)    | (88 59 to 133 27)    | (84 32 to 129 00)    | (80 07 to 124 68)    | (75 79 to 120 49)    |
| <b>High-middle SDI</b>           | 718 82               | 693 64               | 669 81               | 647 70               | 624 96               | 602 73               | 581 65               | 562 76               | 545 91               | 531 94               |
| (633 85 to 820 88)               | (611 29 to 790 13)   | (591 19 to 763 39)   | (575 69 to 736 48)   | (557 28 to 708 43)   | (538 21 to 680 18)   | (518 99 to 656 20)   | (503 30 to 631 57)   | (489 14 to 609 94)   | (477 46 to 593 76)   | (466 78 to 578 08)   |
| <b>Middle SDI</b>                | 1356 99              | 1444 76              | 1534 16              | 1634 59              | 1735 87              | 1838 07              | 1942 13              | 2048 09              | 2155 94              | 2264 69              |
| (1306 71 to 1707 57)             | (1342 88 to 1644 77) | (1298 73 to 1590 45) | (1260 52 to 1535 78) | (1220 12 to 1478 48) | (1176 32 to 1422 81) | (1137 47 to 1366 88) | (1105 58 to 1314 17) | (1068 26 to 1269 17) | (1038 98 to 1228 19) | (1016 70 to 1197 26) |
| <b>Low-middle SDI</b>            | 2124 98              | 2105 45              | 2090 47              | 2072 80              | 2057 14              | 2043 28              | 2029 71              | 2018 60              | 2006 70              | 1997 26              |
| (1955 53 to 2318 63)             | (1936 65 to 2293 51) | (1925 81 to 2278 12) | (1913 47 to 2258 66) | (1902 70 to 2235 32) | (1892 70 to 2217 41) | (1879 80 to 2199 90) | (1871 09 to 2181 83) | (1861 08 to 2163 72) | (1854 27 to 2146 72) | (1847 21 to 2136 72) |
| <b>Low SDI</b>                   | 398 98               | 409 97               | 403 86               | 407 30               | 411 00               | 415 63               | 419 58               | 423 83               | 428 43               | 433 39               |
| (379 40 to 420 69)               | (381 50 to 422 89)   | (384 24 to 429 23)   | (387 45 to 429 23)   | (391 23 to 433 05)   | (396 19 to 437 90)   | (401 14 to 443 61)   | (406 19 to 446 16)   | (411 24 to 445 94)   | (416 29 to 444 78)   | (421 34 to 443 39)   |
| <b>High-income</b>               | 134 48               | 128 24               | 120 43               | 115 01               | 107 34               | 100 64               | 93 91                | 88 05                | 84 20                | 81 67                |
| (113 85 to 162 03)               | (108 61 to 154 22)   | (102 50 to 144 77)   | (97 71 to 137 27)    | (92 00 to 126 84)    | (87 02 to 117 77)    | (81 56 to 109 00)    | (77 09 to 101 57)    | (74 14 to 96 82)     | (71 80 to 93 86)     | (69 57 to 91 63)     |
| <b>High-income North America</b> | 25 70                | 25 70                | 25 70                | 25 70                | 25 70                | 25 70                | 25 70                | 25 70                | 25 70                | 25 70                |
| (24 86 to 26 54)                 | (24 02 to 25 05)     | (18 56 to 22 74)     | (17 85 to 21 59)     | (17 15 to 20 70)     | (16 61 to 20 10)     | (16 36 to 19 69)     | (16 04 to 19 11)     | (15 86 to 18 74)     | (15 76 to 18 68)     | (15 70 to 18 68)     |
| <b>Canada</b>                    | 2 05                 | 1 90                 | 1 80                 | 1 69                 | 1 67                 | 1 63                 | 1 56                 | 1 48                 | 1 42                 | 1 35                 |
| (2 02 to 2 09)                   | (1 87 to 2 04)       | (1 77 to 1 83)       | (1 66 to 1 72)       | (1 54 to 1 60)       | (1 43 to 1 49)       | (1 34 to 1 39)       | (1 26 to 1 31)       | (1 19 to 1 24)       | (1 13 to 1 17)       | (1 07 to 1 11)       |
| <b>Greenland</b>                 | 0 02                 | 0 02                 | 0 02                 | 0 02                 | 0 01                 | 0 01                 | 0 01                 | 0 01                 | 0 01                 | 0 01                 |
| (0 02 to 0 03)                   | (0 02 to 0 02)       | (0 02 to 0 02)       | (0 02 to 0 02)       | (0 01 to 0 02)       | (0 01 to 0 02)       | (0 01 to 0 01)       | (0 01 to 0 01)       | (0 01 to 0 01)       | (0 01 to 0 01)       | (0 01 to 0 01)       |
| <b>United States</b>             | 22 93                | 20 63                | 18 64                | 17 85                | 17 16                | 16 60                | 16 37                | 16 11                | 15 93                | 16 02                |
| (20 63 to 25 55)                 | (18 53 to 21 08)     | (16 36 to 20 87)     | (16 16 to 19 84)     | (15 47 to 18 97)     | (14 97 to 18 31)     | (14 79 to 18 08)     | (14 57 to 17 59)     | (14 33 to 17 30)     | (14 17 to 17 28)     | (14 00 to 17 28)     |
| <b>Australasia</b>               | 2 25                 | 2 75                 | 2 54                 | 2 21                 | 1 88                 | 1 58                 | 1 35                 | 1 19                 | 1 09                 | 1 00                 |
| (2 36 to 3 18)                   | (2 37 to 3 19)       | (2 24 to 2 96)       | (2 04 to 2 70)       | (1 93 to 2 53)       | (1 73 to 2 27)       | (1 62 to 2 10)       | (1 49 to 1 95)       | (1 38 to 1 72)       | (1 28 to 1 72)       | (1 20 to 1 72)       |
| <b>Australia</b>                 | 2 20                 | 2 21                 | 2 04                 | 1 88                 | 1 78                 | 1 58                 | 1 47                 | 1 35                 | 1 27                 | 1 19                 |
| (1 87 to 2 58)                   | (1 87 to 2 59)       | (1 72 to 2 59)       | (1 60 to 2 19)       | (1 52 to 2 19)       | (1 36 to 1 83)       | (1 26 to 1 58)       | (1 16 to 1 39)       | (1 08 to 1 39)       | (1 00 to 1 39)       | (0 93 to 1 39)       |
| <b>New Zealand</b>               | 0 54                 | 0 53                 | 0 50                 | 0 47                 | 0 44                 | 0 41                 | 0 38                 | 0 35                 | 0 32                 | 0 30                 |
| (0 49 to 0 60)                   | (0 48 to 0 59)       | (0 45 to 0 55)       | (0 40 to 0 52)       | (0 40 to 0 48)       | (0 37 to 0 45)       | (0 34 to 0 42)       | (0 32 to 0 38)       | (0 29 to 0 35)       | (0 27 to 0 33)       | (0 26 to 0 33)       |
| <b>High-income Asia Pacific</b>  | 43 13                | 41 12                | 39 32                | 37 93                | 34 51                | 31 01                | 28 23                | 25 67                | 24 14                | 23 06                |
| (33 35 to 56 40)                 | (31 55 to 44 11)     | (30 24 to 45 45)     | (29 24 to 49 03)     | (27 24 to 44 57)     | (24 23 to 39 35)     | (21 24 to 34 44)     | (20 24 to 32 50)     | (19 26 to 30 45)     | (18 26 to 28 79)     | (17 26 to 28 79)     |
| <b>Brunei</b>                    | 0 09                 | 0 09                 | 0 08                 | 0 08                 | 0 08                 | 0 08                 | 0 08                 | 0 07                 | 0 07                 | 0 07                 |
| (0 07 to 0 11)                   | (0 07 to 0 11)       | (0 07 to 0 11)       | (0 07 to 0 10)       | (0 06 to 0 10)       | (0 06 to 0 10)       | (0 06 to 0 10)       | (0 06 to 0 10)       | (0 06 to 0 09)       | (0 06 to 0 09)       | (0 06 to 0 09)       |
| <b>Japan</b>                     | 25 37                | 25 37                | 25 37                | 25 37                | 25 37                | 25 37                | 25 37                | 25 37                | 25 37                | 25 37                |
| (18 73 to 31 38)                 | (18 07 to 38 06)     | (17 58 to 36 46)     | (17 58 to 35 51)     | (17 52 to 31 87)     | (17 47 to 27 79)     | (17 42 to 23 09)     | (17 37 to 19 01)     | (17 32 to 15 54)     | (17 27 to 13 80)     | (17 22 to 10 33)     |
| <b>Singapore</b>                 | 0 62                 | 0 61                 | 0 60                 | 0 54                 | 0 45                 | 0 41                 | 0 34                 | 0 34                 | 0 34                 | 0 34                 |
| (0 59 to 0 65)                   | (0 59 to 0 64)       | (0 58 to 0 64)       | (0 52 to 0 57)       | (0 43 to 0 47)       | (0 39 to 0 43)       | (0 35 to 0 39)       | (0 32 to 0 36)       | (0 32 to 0 36)       | (0 32 to 0 36)       | (0 32 to 0 36)       |
| <b>South Korea</b>               | 15 65                | 14 28                | 13 28                | 12 24                | 11 36                | 10 46                | 9 38                 | 8 34                 | 7 34                 | 6 39                 |
| (13 97 to 16 26)                 | (13 13 to 15 28)     | (12 28 to 14 35)     | (11 33 to 13 20)     | (10 51 to 12 24)     | (9 69 to 11 29)      | (8 78 to 10 23)      | (7 71 to 9 97)       | (7 51 to 8 77)       | (7 47 to 8 93)       | (7 42 to 9 83)       |
| <b>Western Europe</b>            | 49 21                | 45 43                | 42 63                | 39 47                | 37 41                | 34 43                | 32 18                | 30 43                | 29 12                | 28 10                |
| (47 36 to 56 19)                 | (45 45 to 53 73)     | (42 67 to 49 48)     | (39 60 to 46 41)     | (36 74 to 42 77)     | (34 96 to 40 35)     | (32 22 to 37 06)     | (30 16 to 34 45)     | (28 76 to 32 74)     | (27 44 to 31 01)     | (26 26 to 29 10)     |
| <b>Andorra</b>                   | 0 00                 | 0 00                 | 0 00                 | 0 00                 | 0 00                 | 0 00                 | 0 00                 | 0 00                 | 0 00                 | 0 00                 |
| (0 00 to 0 00)                   | (0 00 to 0 00)       | (0 00 to 0 00)       | (0 00 to 0 00)       | (0 00 to 0 00)       | (0 00 to 0 00)       | (0 00 to 0 00)       | (0 00 to 0 00)       | (0 00 to 0 00)       | (0 00 to 0 00)       | (0 00 to 0 00)       |
| <b>Austria</b>                   | 0 68                 | 0 66                 | 0 62                 | 0 56                 | 0 55                 | 0 49                 | 0 42                 | 0 38                 | 0 36                 | 0 35                 |
| (0 60 to 0 75)                   | (0 60 to 0 72)       | (0 57 to 0 67)       | (0 52 to 0 61)       | (0 51 to 0 60)       | (0 45 to 0 53)       | (0 38 to 0 45)       | (0 33 to 0 42)       | (0 33 to 0 39)       | (0 33 to 0 38)       | (0 33 to 0 38)       |
| <b>Belgium</b>                   | 1 86                 | 1 76                 | 1 62                 | 1 46                 | 1 34                 | 1 26                 | 1 14                 | 1 06                 | 0 98                 | 0 90                 |
| (1 27 to 2 67)                   | (1 22 to 2 52)       | (1 13 to 2 29)       | (1 01 to 2 07)       | (0 91 to 1 89)       | (0 86 to 1 77)       | (0 83 to 1 69)       | (0 79 to 1 59)       | (0 75 to 1 52)       | (0 73 to 1 44)       | (0 71 to 1 44)       |
| <b>Cyprus</b>                    | 0 17                 | 0 15                 | 0 14                 | 0 12                 | 0 12                 | 0 11                 | 0 11                 | 0 11                 | 0 11                 | 0 11                 |
| (0 17 to 0 18)                   | (0 15 to 0 16)       | (0 13 to 0 14)       | (0 12 to 0 13)       | (0 11 to 0 12)       | (0 11 to 0 12)       | (0 11 to 0 12)       | (0 11 to 0 12)       | (0 10 to 0 11)       | (0 10 to 0 11)       | (0 10 to 0 11)       |
| <b>Denmark</b>                   | 0 38                 | 0 35                 | 0 32                 | 0 29                 | 0 27                 | 0 25                 | 0 23                 | 0 21                 | 0 20                 | 0 19                 |
| (0 32 to 0 47)                   | (0 32 to 0 46)       | (0 29 to 0 42)       | (0 27 to 0 38)       | (0 25 to 0 35)       | (0 23 to 0 32)       | (0 21 to 0 28)       | (0 19 to 0 25)       | (0 18 to 0 24)       | (0 18 to 0 22)       | (0 18 to 0 22)       |
| <b>Finland</b>                   | 0 27                 | 0 25                 | 0 23                 | 0 21                 | 0 20                 | 0 20                 | 0 20                 | 0 20                 | 0 18                 | 0 17                 |
| (0 26 to 0 28)                   | (0 24 to 0 26)       | (0 22 to 0 24)       | (0 21 to 0 22)       | (0 22 to 0 23)       | (0 22 to 0 24)       | (0 20 to 0 22)       | (0 19 to 0 21)       | (0 17 to 0 18)       | (0 16 to 0 17)       | (0 16 to 0 17)       |
| <b>France</b>                    | 9 32                 | 9 16                 | 8 59                 | 8 50                 | 8 26                 | 7 94                 | 7 64                 | 7 30                 | 7 00                 | 6 70                 |
| (9 10 to 9 56)                   | (8 94 to 9 39)       | (8 30 to 8 72)       | (7 58 to 9 96)       | (6 80 to 7 14)       | (6 88 to 7 22)       | (6 30 to 6 60)       | (6 04 to 6 34)       | (5 66 to 6 95)       | (5 47 to 6 74)       | (5 27 to 6 54)       |
| <b>Germany</b>                   | 5 21                 | 4 91                 | 4 36                 | 4 01                 | 3 83                 | 3 73                 | 3 49                 | 3 18                 | 3 06                 | 2 96                 |
| (5 17 to 5 26)                   | (4 87 to 4 96)       | (4 32 to 4 40)       | (3 98 to 4 05)       | (3 80 to 3 87)       | (3 70 to 3 77)       | (3 46 to 3 52)       | (3 21 to 3 28)       | (3 15 to 3 21)       | (3 06 to 3 09)       | (2 96 to 3 09)       |
| <b>Greece</b>                    | 1 39                 | 1 23                 | 1 18                 | 1 18                 | 1 18                 | 1 18                 | 1 18                 | 1 18                 | 1 18                 | 1 18                 |
| (1 36 to 1 43)                   | (1 25 to 1 31)       | (1 21 to 1 26)       | (1 16 to 1 21)       | (1 16 to 1 21)       | (1 12 to 1 19)       | (1 12 to 1 17)       | (1 06 to 1 11)       | (1 01 to 1 08)       | (1 00 to 1 05)       | (0 99 to 1 05)       |
| <b>Iceland</b>                   | 0 02                 | 0 02                 | 0 02                 | 0 02                 | 0 02                 | 0 02                 | 0 01                 | 0 01                 | 0 01                 | 0 01                 |
| (0 02 to 0 02)                   | (0 02 to 0 02)       | (0 02 to 0 02)       | (0 02 to 0 02)       | (0 01 to 0 02)       | (0 01 to 0 02)       | (0 01 to 0 02)       | (0 01 to 0 02)       | (0 01 to 0 02)       | (0 01 to 0 02)       | (0 01 to 0 02)       |
| <b>Ireland</b>                   | 0 50                 | 0 50                 | 0 50                 | 0 50                 | 0 49                 | 0 45                 | 0 45                 | 0 45                 | 0 45                 | 0 45                 |
| (0 47 to 0 54)                   | (0 47 to 0 53)       | (0 47 to 0 53)       | (0 46 to 0 53)       | (0 46 to 0 52)       | (0 45 to 0 50)       | (0 43 to 0 48)       | (0 43 to 0 48)       | (0 42 to 0 48)       | (0 42 to 0 48)       | (0 42 to 0 48)       |
| <b>Israel</b>                    | 0 46                 | 0 46                 | 0 47                 | 0 50                 | 0 53                 | 0 55                 | 0 54                 | 0 51                 | 0 50                 | 0 48                 |
| (0 38 to 0 55)                   | (0 38 to 0 56)       | (0 39 to 0 57)       | (0 42 to 0 60)       | (0 44 to 0 64)       | (0 46 to 0 66)       | (0 45 to 0 65)       | (0 44 to 0 64)       | (0 41 to 0 60)       | (0 40 to 0 58)       | (0 39 to 0 58)       |
| <b>Italy</b>                     | 8 97                 | 8 73                 | 8 20                 | 7 84                 | 7 46                 | 7 06                 | 6 74                 | 6 48                 | 6 26                 | 6 05                 |
| (7 97 to 10 11)                  | (7 78 to 9 82)       | (7 29 to 9 03)       | (6 36 to 7 97)       | (5 74 to 7 21)       | (5 13 to 6 39)       | (4 59 to 5 69)       | (4 59 to 5 69)       | (4 59 to 5 69)       | (4 59 to 5 69)       | (4 59 to 5 69)       |
| <b>Luxembourg</b>                | 0 02                 | 0 02                 | 0 02                 | 0 02                 | 0 02                 | 0 01                 | 0 01                 | 0 01                 | 0 01                 | 0 01                 |
| (0 02 to 0 03)                   | (0 02 to 0 02)       | (0 02 to 0 02)       | (0 01 to 0 02)       | (0 01 to 0 02)       | (0 01 to 0 02)       | (0 01 to 0 02)       | (0 01 to 0 02)       | (0 01 to 0 02)       | (0 01 to 0 02)       | (0 01 to 0 02)       |
| <b>Malta</b>                     | 0 05                 | 0 04                 | 0 04                 | 0 04                 | 0 04                 | 0 04                 | 0 04                 | 0 03                 | 0 03                 | 0 03                 |
| (0 05 to 0 05)                   | (0 04 to 0 04)       | (0 04 to 0 04)       | (0 04 to 0 04)       | (0 04 to 0 04)       | (0 04 to 0 04)       | (0 04 to 0 04)       | (0 03 to 0 03)       | (0 03 to 0 03)       | (0 03 to 0 03)       | (0 03 to 0 03)       |
| <b>Netherlands</b>               | 2 26                 | 2 05                 | 1 84                 | 1 65                 | 1 54                 | 1 44                 | 1 37                 | 1 27                 | 1 25                 | 1 20                 |
| (1 46 to 3 11)                   | (1 32 to 2 11)       | (1 22 to 2 08)       | (1 08 to 2 50)       | (1 02 to 2 27)       | (0 92 to 2 09)       | (0 82 to 1 97)       | (0 82 to 1 82)       | (0 82 to 1 76)       | (0 82 to 1 76)       | (0 82 to 1 76)       |
| <b>Norway</b>                    | 0 38                 | 0 36                 | 0 33                 | 0 31                 | 0 28                 | 0 26                 | 0 23                 | 0 21                 | 0 20                 | 0 19                 |
| (0 34 to 0 40)                   | (0 34 to 0 39)       | (0 31 to 0 36)       | (0 29 to 0 33)       | (0 26 to 0 30)       | (0 24 to 0 27)       | (0 22 to 0 25)       | (0 19 to 0 21)       | (0 18 to 0 20)       | (0 18 to 0 20)       | (0 18 to 0 20)       |
| <b>Portugal</b>                  | 2 71                 | 2 51                 | 2 22                 | 2 11                 | 2 03                 | 1 93                 | 1 82                 | 1 68                 | 1 48                 | 1 37                 |
| (2 65 to 2 79)                   | (2 45 to 2 58)       | (2 25 to 2 32)       | (2 06 to 2 17)       | (1 88 to 2 08)       | (1 83 to 1 98)       | (1 83 to 1 87)       | (1 64 to 1 72)       | (1 54 to 1 52)       | (1 34 to 1 40)       | (1 34 to 1           |

| Appendix Table 18A. Stillbirths (in thousands) by location, 1970-1979 |                                 |                                |                                |                                |                                |                               |                               |                               |                               |                               |
|-----------------------------------------------------------------------|---------------------------------|--------------------------------|--------------------------------|--------------------------------|--------------------------------|-------------------------------|-------------------------------|-------------------------------|-------------------------------|-------------------------------|
|                                                                       | 1970                            | 1971                           | 1972                           | 1973                           | 1974                           | 1975                          | 1976                          | 1977                          | 1978                          | 1979                          |
| Azerbaijan                                                            | 4.14<br>(3.99 to 4.30)          | 3.88<br>(3.74 to 4.03)         | 3.66<br>(3.53 to 3.81)         | 3.46<br>(3.33 to 3.60)         | 3.28<br>(3.16 to 3.41)         | 3.14<br>(3.03 to 3.27)        | 3.01<br>(2.90 to 3.13)        | 3.00<br>(2.89 to 3.12)        | 3.05<br>(2.95 to 3.17)        | 3.14<br>(3.02 to 3.26)        |
| Georgia                                                               | 2.53<br>(2.30 to 2.79)          | 2.50<br>(2.29 to 2.65)         | 2.30<br>(2.09 to 2.53)         | 2.10<br>(1.99 to 2.41)         | 2.00<br>(1.89 to 2.30)         | 1.90<br>(1.82 to 2.19)        | 1.80<br>(1.72 to 2.08)        | 1.80<br>(1.69 to 1.98)        | 1.71<br>(1.61 to 1.81)        | 1.60<br>(1.46 to 1.78)        |
| Kazakhstan                                                            | 5.66<br>(5.26 to 6.09)          | 5.44<br>(5.06 to 5.85)         | 5.30<br>(4.94 to 5.70)         | 5.20<br>(4.85 to 5.59)         | 5.15<br>(4.80 to 5.51)         | 5.10<br>(4.76 to 5.47)        | 5.04<br>(4.71 to 5.39)        | 4.97<br>(4.65 to 5.30)        | 4.89<br>(4.58 to 5.21)        | 4.80<br>(4.49 to 5.12)        |
| Kyrgyzstan                                                            | 3.34<br>(3.26 to 3.52)          | 3.29<br>(3.12 to 3.36)         | 3.20<br>(2.99 to 3.22)         | 3.10<br>(2.87 to 3.10)         | 3.00<br>(2.78 to 3.00)         | 2.91<br>(2.71 to 2.92)        | 2.81<br>(2.65 to 2.86)        | 2.71<br>(2.61 to 2.82)        | 2.69<br>(2.58 to 2.79)        | 2.67<br>(2.57 to 2.78)        |
| Mongolia                                                              | 1.24<br>(1.20 to 1.29)          | 1.22<br>(1.18 to 1.27)         | 1.20<br>(1.16 to 1.25)         | 1.19<br>(1.15 to 1.24)         | 1.19<br>(1.14 to 1.23)         | 1.19<br>(1.15 to 1.24)        | 1.19<br>(1.15 to 1.24)        | 1.20<br>(1.16 to 1.25)        | 1.20<br>(1.17 to 1.26)        | 1.23<br>(1.18 to 1.28)        |
| Tajikistan                                                            | 3.28<br>(3.33 to 3.51)          | 3.28<br>(3.20 to 3.37)         | 3.28<br>(3.19 to 3.37)         | 3.28<br>(3.19 to 3.37)         | 3.29<br>(3.21 to 3.38)         | 3.29<br>(3.21 to 3.38)        | 3.29<br>(3.20 to 3.37)        | 3.29<br>(3.21 to 3.34)        | 3.26<br>(3.18 to 3.24)        | 3.16<br>(3.08 to 3.24)        |
| Turkmenistan                                                          | 1.92<br>(1.89 to 1.96)          | 1.87<br>(1.84 to 1.91)         | 1.84<br>(1.81 to 1.87)         | 1.80<br>(1.77 to 1.84)         | 1.78<br>(1.75 to 1.81)         | 1.77<br>(1.74 to 1.80)        | 1.77<br>(1.72 to 1.78)        | 1.74<br>(1.72 to 1.77)        | 1.74<br>(1.71 to 1.77)        | 1.75<br>(1.72 to 1.78)        |
| Uzbekistan                                                            | 6.69<br>(6.69 to 7.22)          | 6.53<br>(6.53 to 7.05)         | 6.41<br>(6.41 to 6.91)         | 6.29<br>(6.29 to 6.78)         | 6.24<br>(6.24 to 6.73)         | 6.25<br>(6.25 to 6.75)        | 6.23<br>(6.23 to 6.73)        | 6.23<br>(6.23 to 6.73)        | 6.35<br>(6.35 to 6.86)        | 6.59<br>(6.59 to 7.11)        |
| Latin America and Caribbean                                           | 263.11<br>(222.64 to 313.70)    | 260.00<br>(219.79 to 309.06)   | 255.79<br>(217.18 to 304.29)   | 251.25<br>(215.96 to 296.66)   | 242.88<br>(212.29 to 290.78)   | 242.88<br>(209.08 to 284.40)  | 238.19<br>(205.28 to 277.90)  | 233.08<br>(202.65 to 270.82)  | 227.75<br>(197.29 to 252.93)  | 222.74<br>(193.47 to 255.81)  |
| Central Latin America                                                 | 71.20<br>(66.29 to 76.63)       | 71.06<br>(66.29 to 76.36)      | 70.61<br>(65.89 to 75.92)      | 70.28<br>(65.33 to 75.15)      | 69.78<br>(64.38 to 75.15)      | 68.86<br>(64.38 to 74.18)     | 67.74<br>(64.40 to 72.85)     | 66.65<br>(64.21 to 71.56)     | 65.46<br>(61.34 to 70.18)     | 64.21<br>(60.20 to 68.72)     |
| Colombia                                                              | 14.92<br>(13.44 to 16.62)       | 14.85<br>(13.39 to 16.48)      | 14.75<br>(13.24 to 16.42)      | 14.64<br>(13.24 to 16.35)      | 14.42<br>(13.03 to 16.13)      | 14.13<br>(12.79 to 15.81)     | 13.90<br>(12.57 to 15.52)     | 13.64<br>(12.31 to 15.19)     | 13.37<br>(12.06 to 14.90)     | 13.20<br>(11.90 to 14.68)     |
| Costa Rica                                                            | 0.78<br>(0.70 to 0.87)          | 0.75<br>(0.67 to 0.83)         | 0.75<br>(0.65 to 0.80)         | 0.68<br>(0.63 to 0.77)         | 0.68<br>(0.62 to 0.75)         | 0.65<br>(0.62 to 0.75)        | 0.65<br>(0.62 to 0.75)        | 0.65<br>(0.62 to 0.75)        | 0.65<br>(0.65 to 0.75)        | 0.70<br>(0.65 to 0.74)        |
| El Salvador                                                           | 4.26<br>(4.16 to 4.38)          | 4.20<br>(4.10 to 4.31)         | 4.12<br>(4.02 to 4.23)         | 4.03<br>(3.94 to 4.14)         | 3.95<br>(3.86 to 4.05)         | 3.86<br>(3.76 to 3.96)        | 3.76<br>(3.67 to 3.86)        | 3.62<br>(3.52 to 3.72)        | 3.47<br>(3.38 to 3.56)        | 3.31<br>(3.22 to 3.40)        |
| Guatemala                                                             | 7.79<br>(6.73 to 9.00)          | 7.36<br>(6.73 to 8.95)         | 7.76<br>(6.73 to 8.95)         | 7.77<br>(6.73 to 8.98)         | 7.74<br>(6.76 to 8.91)         | 7.66<br>(6.69 to 8.79)        | 7.57<br>(6.60 to 8.67)        | 7.51<br>(6.55 to 8.57)        | 7.44<br>(6.49 to 8.48)        | 7.38<br>(6.43 to 8.38)        |
| Honduras                                                              | 3.70<br>(3.68 to 3.72)          | 3.66<br>(3.64 to 3.68)         | 3.62<br>(3.60 to 3.64)         | 3.58<br>(3.56 to 3.60)         | 3.55<br>(3.54 to 3.57)         | 3.53<br>(3.51 to 3.55)        | 3.48<br>(3.46 to 3.50)        | 3.41<br>(3.39 to 3.43)        | 3.26<br>(3.24 to 3.28)        | 3.26<br>(3.24 to 3.28)        |
| Mexico                                                                | 29.99<br>(28.58 to 31.53)       | 29.56<br>(28.51 to 31.38)      | 29.26<br>(28.16 to 31.24)      | 29.20<br>(28.22 to 31.15)      | 29.22<br>(28.05 to 30.97)      | 29.22<br>(27.87 to 30.74)     | 29.22<br>(27.60 to 30.43)     | 29.22<br>(27.33 to 30.11)     | 28.65<br>(26.92 to 29.67)     | 27.64<br>(26.38 to 29.05)     |
| Nicaragua                                                             | 2.27<br>(2.23 to 2.30)          | 2.27<br>(2.19 to 2.26)         | 2.27<br>(2.16 to 2.23)         | 2.16<br>(2.12 to 2.20)         | 2.16<br>(2.09 to 2.15)         | 2.16<br>(2.05 to 2.12)        | 2.16<br>(2.00 to 2.36)        | 2.16<br>(2.02 to 2.10)        | 1.98<br>(1.92 to 1.98)        | 1.95<br>(1.93 to 1.99)        |
| Panama                                                                | 0.65<br>(0.59 to 0.72)          | 0.63<br>(0.54 to 0.67)         | 0.60<br>(0.54 to 0.67)         | 0.58<br>(0.52 to 0.64)         | 0.56<br>(0.51 to 0.62)         | 0.55<br>(0.50 to 0.61)        | 0.55<br>(0.49 to 0.60)        | 0.53<br>(0.48 to 0.59)        | 0.53<br>(0.48 to 0.58)        | 0.52<br>(0.47 to 0.57)        |
| Venezuela                                                             | 6.85<br>(6.28 to 7.49)          | 7.14<br>(6.52 to 7.77)         | 7.14<br>(6.55 to 7.81)         | 7.27<br>(6.66 to 7.95)         | 7.27<br>(6.74 to 8.06)         | 7.27<br>(6.54 to 7.81)        | 7.27<br>(6.27 to 7.48)        | 7.27<br>(6.08 to 7.23)        | 7.27<br>(5.92 to 7.03)        | 7.27<br>(5.74 to 6.82)        |
| Andean Latin America                                                  | 39.91<br>(33.24 to 48.19)       | 39.18<br>(32.50 to 46.97)      | 38.62<br>(32.14 to 46.39)      | 38.23<br>(32.01 to 45.98)      | 37.88<br>(31.79 to 45.35)      | 37.61<br>(31.62 to 44.87)     | 37.28<br>(31.53 to 44.15)     | 37.28<br>(31.36 to 43.48)     | 36.84<br>(30.90 to 42.60)     | 35.69<br>(29.77 to 41.74)     |
| Bolivia                                                               | 11.52<br>(9.50 to 13.95)        | 11.31<br>(9.33 to 13.70)       | 11.11<br>(9.17 to 13.54)       | 10.92<br>(9.07 to 13.30)       | 10.72<br>(8.91 to 13.01)       | 10.55<br>(8.75 to 12.75)      | 10.34<br>(8.54 to 12.45)      | 10.13<br>(8.35 to 12.20)      | 10.13<br>(8.40 to 12.00)      | 9.96<br>(8.09 to 11.75)       |
| Ecuador                                                               | 6.51<br>(5.25 to 8.12)          | 6.36<br>(5.15 to 6.89)         | 6.36<br>(5.10 to 7.87)         | 6.36<br>(5.08 to 7.86)         | 6.37<br>(5.09 to 7.87)         | 6.37<br>(5.11 to 7.90)        | 6.42<br>(5.12 to 7.88)        | 6.34<br>(5.05 to 7.78)        | 6.23<br>(4.97 to 6.61)        | 6.15<br>(4.91 to 7.53)        |
| Peru                                                                  | 21.89<br>(18.44 to 26.04)       | 21.48<br>(18.07 to 25.52)      | 21.85<br>(17.83 to 25.10)      | 21.85<br>(17.67 to 24.85)      | 21.85<br>(17.55 to 24.57)      | 21.85<br>(17.47 to 24.44)     | 21.85<br>(17.45 to 24.17)     | 21.85<br>(17.28 to 23.90)     | 21.85<br>(17.07 to 23.43)     | 21.85<br>(16.81 to 23.03)     |
| Caribbean                                                             | 36.70<br>(29.52 to 46.60)       | 36.50<br>(29.27 to 46.42)      | 36.30<br>(28.79 to 44.62)      | 36.30<br>(27.80 to 42.39)      | 36.30<br>(26.80 to 39.77)      | 36.30<br>(26.28 to 38.21)     | 36.30<br>(25.85 to 36.98)     | 36.30<br>(25.18 to 35.59)     | 36.30<br>(24.70 to 34.62)     | 36.30<br>(24.12 to 33.42)     |
| Antigua and Barbuda                                                   | 0.02<br>(0.02 to 0.03)          | 0.02<br>(0.02 to 0.03)         | 0.02<br>(0.02 to 0.03)         | 0.02<br>(0.02 to 0.03)         | 0.02<br>(0.02 to 0.03)         | 0.02<br>(0.02 to 0.03)        | 0.02<br>(0.02 to 0.03)        | 0.02<br>(0.02 to 0.03)        | 0.02<br>(0.02 to 0.03)        | 0.02<br>(0.02 to 0.02)        |
| The Bahamas                                                           | 0.12<br>(0.07 to 0.19)          | 0.11<br>(0.07 to 0.18)         | 0.11<br>(0.07 to 0.17)         | 0.10<br>(0.06 to 0.16)         | 0.10<br>(0.06 to 0.15)         | 0.10<br>(0.07 to 0.16)        | 0.10<br>(0.06 to 0.16)        | 0.10<br>(0.06 to 0.15)        | 0.10<br>(0.06 to 0.15)        | 0.10<br>(0.06 to 0.15)        |
| Barbados                                                              | 0.11<br>(0.08 to 0.13)          | 0.10<br>(0.08 to 0.12)         | 0.10<br>(0.08 to 0.12)         | 0.09<br>(0.07 to 0.11)         | 0.09<br>(0.07 to 0.10)         | 0.09<br>(0.06 to 0.10)        | 0.09<br>(0.06 to 0.09)        | 0.09<br>(0.06 to 0.09)        | 0.09<br>(0.05 to 0.08)        | 0.09<br>(0.05 to 0.08)        |
| Belize                                                                | 0.15<br>(0.12 to 0.19)          | 0.14<br>(0.12 to 0.18)         | 0.14<br>(0.12 to 0.18)         | 0.14<br>(0.11 to 0.17)         | 0.13<br>(0.11 to 0.17)         | 0.13<br>(0.11 to 0.16)        | 0.13<br>(0.10 to 0.16)        | 0.13<br>(0.10 to 0.16)        | 0.13<br>(0.10 to 0.15)        | 0.12<br>(0.10 to 0.15)        |
| Bermuda                                                               | 0.02<br>(0.02 to 0.03)          | 0.02<br>(0.01 to 0.03)         | 0.02<br>(0.01 to 0.02)         | 0.02<br>(0.01 to 0.02)         | 0.02<br>(0.01 to 0.02)         | 0.02<br>(0.01 to 0.02)        | 0.02<br>(0.01 to 0.02)        | 0.02<br>(0.01 to 0.02)        | 0.02<br>(0.01 to 0.02)        | 0.02<br>(0.01 to 0.02)        |
| Cuba                                                                  | 5.85<br>(3.18 to 10.21)         | 5.93<br>(3.24 to 10.44)        | 5.28<br>(2.93 to 10.07)        | 4.57<br>(2.54 to 7.68)         | 3.91<br>(2.42 to 6.45)         | 3.55<br>(1.99 to 5.51)        | 3.25<br>(1.79 to 5.51)        | 2.81<br>(1.54 to 4.84)        | 2.50<br>(1.39 to 3.61)        | 2.29<br>(1.28 to 3.86)        |
| Dominica                                                              | 0.04<br>(0.03 to 0.05)          | 0.04<br>(0.03 to 0.05)         | 0.04<br>(0.03 to 0.04)         | 0.04<br>(0.03 to 0.04)         | 0.04<br>(0.02 to 0.03)         | 0.04<br>(0.02 to 0.03)        | 0.04<br>(0.02 to 0.03)        | 0.04<br>(0.02 to 0.03)        | 0.04<br>(0.01 to 0.02)        | 0.04<br>(0.01 to 0.02)        |
| Dominican Republic                                                    | 6.04<br>(5.42 to 6.82)          | 6.11<br>(5.47 to 6.88)         | 6.10<br>(5.45 to 6.87)         | 5.98<br>(5.34 to 6.72)         | 5.86<br>(5.24 to 6.58)         | 5.79<br>(5.18 to 6.52)        | 5.73<br>(5.12 to 6.45)        | 5.61<br>(5.01 to 6.29)        | 5.42<br>(4.80 to 6.14)        | 5.33<br>(4.74 to 6.07)        |
| Grenada                                                               | 0.06<br>(0.05 to 0.07)          | 0.06<br>(0.05 to 0.07)         | 0.06<br>(0.04 to 0.07)         | 0.05<br>(0.04 to 0.07)         | 0.05<br>(0.04 to 0.06)         | 0.05<br>(0.04 to 0.06)        | 0.05<br>(0.04 to 0.06)        | 0.05<br>(0.04 to 0.06)        | 0.04<br>(0.03 to 0.06)        | 0.04<br>(0.03 to 0.06)        |
| Guyana                                                                | 0.77<br>(0.72 to 0.84)          | 0.77<br>(0.72 to 0.83)         | 0.77<br>(0.72 to 0.83)         | 0.76<br>(0.70 to 0.82)         | 0.75<br>(0.68 to 0.81)         | 0.73<br>(0.65 to 0.79)        | 0.71<br>(0.63 to 0.76)        | 0.69<br>(0.61 to 0.75)        | 0.67<br>(0.61 to 0.71)        | 0.66<br>(0.61 to 0.71)        |
| Haiti                                                                 | 18.23<br>(14.49 to 22.41)       | 18.06<br>(14.52 to 22.41)      | 18.06<br>(14.52 to 22.26)      | 17.34<br>(13.99 to 21.81)      | 16.82<br>(13.55 to 21.27)      | 16.32<br>(13.28 to 20.79)     | 16.32<br>(13.18 to 20.57)     | 16.32<br>(13.03 to 20.45)     | 16.32<br>(12.84 to 20.18)     | 16.32<br>(12.59 to 19.58)     |
| Jamaica                                                               | 1.77<br>(1.51 to 1.94)          | 1.66<br>(1.47 to 1.80)         | 1.66<br>(1.41 to 1.80)         | 1.52<br>(1.35 to 1.73)         | 1.43<br>(1.21 to 1.66)         | 1.43<br>(1.27 to 1.60)        | 1.39<br>(1.21 to 1.52)        | 1.36<br>(1.18 to 1.46)        | 1.33<br>(1.16 to 1.46)        | 1.31<br>(1.16 to 1.46)        |
| Puerto Rico                                                           | 1.32<br>(1.26 to 1.38)          | 1.29<br>(1.23 to 1.35)         | 1.24<br>(1.19 to 1.30)         | 1.24<br>(1.14 to 1.26)         | 1.17<br>(1.10 to 1.23)         | 1.16<br>(1.11 to 1.22)        | 1.14<br>(1.09 to 1.20)        | 1.12<br>(1.07 to 1.17)        | 1.08<br>(0.98 to 1.17)        | 1.03<br>(0.98 to 1.07)        |
| Saint Lucia                                                           | 0.10<br>(0.08 to 0.11)          | 0.09<br>(0.08 to 0.10)         | 0.09<br>(0.08 to 0.10)         | 0.08<br>(0.07 to 0.10)         | 0.08<br>(0.07 to 0.09)         | 0.08<br>(0.07 to 0.09)        | 0.08<br>(0.06 to 0.08)        | 0.07<br>(0.06 to 0.08)        | 0.07<br>(0.06 to 0.08)        | 0.07<br>(0.05 to 0.08)        |
| Saint Vincent and the Grenadines                                      | 0.05<br>(0.04 to 0.08)          | 0.05<br>(0.03 to 0.08)         | 0.05<br>(0.03 to 0.07)         | 0.05<br>(0.03 to 0.07)         | 0.05<br>(0.03 to 0.07)         | 0.05<br>(0.03 to 0.07)        | 0.05<br>(0.03 to 0.06)        | 0.04<br>(0.03 to 0.06)        | 0.04<br>(0.03 to 0.06)        | 0.04<br>(0.03 to 0.06)        |
| Suriname                                                              | 0.34<br>(0.29 to 0.38)          | 0.33<br>(0.27 to 0.38)         | 0.31<br>(0.26 to 0.35)         | 0.31<br>(0.24 to 0.35)         | 0.28<br>(0.24 to 0.31)         | 0.27<br>(0.23 to 0.31)        | 0.26<br>(0.22 to 0.30)        | 0.26<br>(0.22 to 0.30)        | 0.26<br>(0.22 to 0.29)        | 0.25<br>(0.22 to 0.29)        |
| Trinidad and Tobago                                                   | 0.59<br>(0.51 to 0.70)          | 0.60<br>(0.52 to 0.70)         | 0.59<br>(0.51 to 0.69)         | 0.58<br>(0.50 to 0.67)         | 0.56<br>(0.49 to 0.65)         | 0.54<br>(0.48 to 0.62)        | 0.53<br>(0.47 to 0.61)        | 0.53<br>(0.48 to 0.60)        | 0.54<br>(0.48 to 0.60)        | 0.54<br>(0.49 to 0.60)        |
| Virgin Islands, U.S.                                                  | 0.03<br>(0.03 to 0.04)          | 0.03<br>(0.03 to 0.04)         | 0.03<br>(0.03 to 0.04)         | 0.03<br>(0.03 to 0.04)         | 0.03<br>(0.03 to 0.04)         | 0.03<br>(0.03 to 0.04)        | 0.03<br>(0.03 to 0.04)        | 0.03<br>(0.03 to 0.04)        | 0.03<br>(0.02 to 0.04)        | 0.03<br>(0.02 to 0.04)        |
| Tropical Latin America                                                | 113.26<br>(93.62 to 142.10)     | 113.26<br>(91.61 to 139.44)    | 113.26<br>(90.33 to 136.51)    | 113.26<br>(89.16 to 133.70)    | 113.26<br>(87.18 to 130.80)    | 113.26<br>(86.34 to 128.18)   | 113.26<br>(84.61 to 124.37)   | 113.26<br>(81.55 to 120.75)   | 113.26<br>(79.38 to 116.45)   | 113.26<br>(77.27 to 113.58)   |
| Brazil                                                                | 109.21<br>(92.18 to 139.36)     | 109.21<br>(90.17 to 136.73)    | 109.21<br>(88.96 to 133.84)    | 109.21<br>(87.69 to 130.98)    | 109.21<br>(85.79 to 128.04)    | 109.21<br>(84.90 to 125.46)   | 109.21<br>(82.61 to 121.91)   | 109.21<br>(80.18 to 118.18)   | 109.21<br>(78.00 to 113.99)   | 109.21<br>(75.91 to 111.14)   |
| Paraguay                                                              | 2.00<br>(1.44 to 2.74)          | 2.00<br>(1.44 to 2.73)         | 1.99<br>(1.44 to 2.73)         | 1.97<br>(1.45 to 2.70)         | 1.95<br>(1.44 to 2.69)         | 1.92<br>(1.41 to 2.63)        | 1.91<br>(1.39 to 2.58)        | 1.89<br>(1.38 to 2.51)        | 1.87<br>(1.37 to 2.48)        | 1.85<br>(1.35 to 2.45)        |
| Southeast Asia, East Asia, and Oceania                                | 1147.90<br>(1050.26 to 1258.75) | 1147.90<br>(997.73 to 1188.45) | 1147.90<br>(947.26 to 1130.52) | 1147.90<br>(903.19 to 1074.82) | 1147.90<br>(859.83 to 1017.69) | 1147.90<br>(814.67 to 963.12) | 1147.90<br>(776.69 to 912.02) | 1147.90<br>(742.21 to 865.74) | 1147.90<br>(714.60 to 830.27) | 1147.90<br>(695.10 to 804.80) |
| East Asia                                                             | 792.76<br>(709.83 to 887.99)    | 744.10<br>(666.70 to 830.41)   | 697.58<br>(625.56 to 781.92)   | 654.22<br>(589.17 to 732.80)   | 611.63<br>(551.59 to 685.90)   | 569.60<br>(513.16 to 637.76)  | 534.31<br>(481.27 to 595.46)  | 502.94<br>(453.86 to 557.27)  | 463.73<br>(432.86 to 529.90)  | 426.52<br>(417.62 to 512.20)  |
| China                                                                 | 777.75<br>(696.33 to 871.23)    | 724.20<br>(654.31 to 815.09)   | 684.80<br>(614.08 to 767.67)   | 647.20<br>(                    |                                |                               |                               |                               |                               |                               |

| Appendix Table 18A. Stillbirths (in thousands) by location, 1970-1979 |                                 |                                 |                                 |                                 |                                 |                                 |                                 |                                 |                                 |                                 |
|-----------------------------------------------------------------------|---------------------------------|---------------------------------|---------------------------------|---------------------------------|---------------------------------|---------------------------------|---------------------------------|---------------------------------|---------------------------------|---------------------------------|
|                                                                       | 1970                            | 1971                            | 1972                            | 1973                            | 1974                            | 1975                            | 1976                            | 1977                            | 1978                            | 1979                            |
| Tonga                                                                 | 0.05<br>(0.04 to 0.05)          | 0.04<br>(0.04 to 0.05)          | 0.04<br>(0.04 to 0.05)          | 0.04<br>(0.04 to 0.05)          | 0.04<br>(0.04 to 0.05)          | 0.04<br>(0.04 to 0.05)          | 0.04<br>(0.04 to 0.05)          | 0.04<br>(0.04 to 0.05)          | 0.04<br>(0.04 to 0.05)          | 0.04<br>(0.04 to 0.05)          |
| Vanuatu                                                               | 0.12<br>(0.11 to 0.13)          | 0.12<br>(0.11 to 0.13)          | 0.12<br>(0.11 to 0.13)          | 0.12<br>(0.11 to 0.13)          | 0.12<br>(0.11 to 0.13)          | 0.12<br>(0.11 to 0.13)          | 0.12<br>(0.11 to 0.13)          | 0.12<br>(0.11 to 0.13)          | 0.12<br>(0.11 to 0.13)          | 0.12<br>(0.11 to 0.13)          |
| <b>North Africa and Middle East</b>                                   | 449.11<br>(383.40 to 529.22)    | 439.26<br>(374.45 to 515.90)    | 429.62<br>(367.66 to 502.77)    | 419.62<br>(360.10 to 492.13)    | 407.44<br>(351.38 to 477.40)    | 395.56<br>(342.37 to 462.03)    | 383.84<br>(332.95 to 446.01)    | 372.56<br>(323.93 to 431.07)    | 362.04<br>(316.13 to 416.21)    | 351.98<br>(307.80 to 401.70)    |
| <b>North Africa and Middle East</b>                                   | 449.11<br>(383.40 to 529.22)    | 439.26<br>(374.45 to 515.90)    | 429.62<br>(367.66 to 502.77)    | 419.62<br>(360.10 to 492.13)    | 407.44<br>(351.38 to 477.40)    | 395.56<br>(342.37 to 462.03)    | 383.84<br>(332.95 to 446.01)    | 372.56<br>(323.93 to 431.07)    | 362.04<br>(316.13 to 416.21)    | 351.98<br>(307.80 to 401.70)    |
| Afghanistan                                                           | 24.84<br>(21.24 to 29.14)       | 25.16<br>(21.89 to 29.40)       | 25.64<br>(21.89 to 29.97)       | 26.05<br>(22.28 to 30.42)       | 26.39<br>(22.53 to 30.84)       | 26.65<br>(22.70 to 31.11)       | 26.68<br>(22.80 to 31.21)       | 26.79<br>(22.86 to 31.28)       | 26.88<br>(22.56 to 31.00)       | 26.42<br>(22.56 to 31.65)       |
| Algeria                                                               | 39.32<br>(30.34 to 49.30)       | 38.71<br>(29.63 to 48.27)       | 37.83<br>(29.63 to 48.27)       | 37.01<br>(29.28 to 45.14)       | 36.00<br>(28.43 to 45.14)       | 35.14<br>(28.02 to 43.53)       | 34.10<br>(27.16 to 41.81)       | 33.02<br>(26.20 to 40.47)       | 31.76<br>(25.30 to 39.29)       | 30.46<br>(24.22 to 37.83)       |
| Bahrain                                                               | 0.25<br>(0.25 to 0.25)          | 0.24<br>(0.23 to 0.24)          | 0.23<br>(0.22 to 0.23)          | 0.22<br>(0.21 to 0.22)          | 0.21<br>(0.20 to 0.21)          | 0.20<br>(0.20 to 0.20)          | 0.20<br>(0.19 to 0.20)          | 0.19<br>(0.18 to 0.19)          | 0.18<br>(0.18 to 0.18)          | 0.18<br>(0.17 to 0.18)          |
| Egypt                                                                 | 101.35<br>(85.69 to 120.20)     | 101.27<br>(85.69 to 119.89)     | 101.27<br>(85.05 to 119.14)     | 101.27<br>(84.10 to 117.34)     | 101.27<br>(82.14 to 114.54)     | 101.27<br>(79.44 to 110.42)     | 101.27<br>(76.62 to 106.65)     | 101.27<br>(73.62 to 102.37)     | 101.27<br>(70.43 to 98.10)      | 101.27<br>(67.23 to 94.59)      |
| Iran                                                                  | 86.46<br>(75.64 to 99.15)       | 86.46<br>(70.03 to 91.63)       | 86.46<br>(64.95 to 84.56)       | 86.46<br>(59.92 to 77.54)       | 86.46<br>(54.18 to 69.93)       | 86.46<br>(49.57 to 63.78)       | 86.46<br>(46.47 to 59.45)       | 86.46<br>(44.27 to 56.53)       | 86.46<br>(43.09 to 56.53)       | 86.46<br>(42.24 to 56.06)       |
| Iraq                                                                  | 16.21<br>(13.78 to 19.12)       | 15.94<br>(13.56 to 18.77)       | 15.79<br>(13.42 to 18.60)       | 15.60<br>(13.12 to 18.37)       | 15.35<br>(13.12 to 18.11)       | 14.99<br>(12.79 to 17.61)       | 14.54<br>(12.37 to 17.06)       | 14.13<br>(12.03 to 16.58)       | 13.71<br>(11.66 to 16.11)       | 13.22<br>(11.16 to 15.58)       |
| Jordan                                                                | 2.53<br>(2.31 to 2.76)          | 2.52<br>(2.32 to 2.75)          | 2.47<br>(2.27 to 2.69)          | 2.41<br>(2.22 to 2.63)          | 2.33<br>(2.15 to 2.54)          | 2.26<br>(2.08 to 2.46)          | 2.11<br>(1.94 to 2.30)          | 1.97<br>(1.81 to 2.14)          | 1.83<br>(1.68 to 2.05)          | 1.70<br>(1.56 to 1.85)          |
| Kuwait                                                                | 0.60<br>(0.48 to 0.74)          | 0.60<br>(0.48 to 0.74)          | 0.60<br>(0.48 to 0.80)          | 0.60<br>(0.47 to 0.87)          | 0.60<br>(0.46 to 0.91)          | 0.60<br>(0.45 to 0.88)          | 0.60<br>(0.44 to 0.86)          | 0.60<br>(0.43 to 0.83)          | 0.60<br>(0.42 to 0.80)          | 0.60<br>(0.41 to 0.78)          |
| Lebanon                                                               | 2.88<br>(2.72 to 3.02)          | 2.90<br>(2.73 to 3.07)          | 2.85<br>(2.68 to 3.02)          | 2.85<br>(2.59 to 3.11)          | 2.81<br>(2.54 to 3.07)          | 2.71<br>(2.45 to 2.97)          | 2.61<br>(2.35 to 2.87)          | 2.53<br>(2.27 to 2.81)          | 2.48<br>(2.22 to 2.74)          | 2.45<br>(2.19 to 2.71)          |
| Libya                                                                 | 2.03<br>(1.72 to 2.39)          | 1.94<br>(1.65 to 2.28)          | 1.87<br>(1.59 to 2.20)          | 1.80<br>(1.49 to 2.12)          | 1.74<br>(1.49 to 2.04)          | 1.68<br>(1.44 to 1.97)          | 1.62<br>(1.38 to 1.90)          | 1.56<br>(1.33 to 1.83)          | 1.50<br>(1.28 to 1.76)          | 1.45<br>(1.23 to 1.71)          |
| Monrovia                                                              | 30.41<br>(27.27 to 34.02)       | 29.85<br>(26.73 to 33.55)       | 29.79<br>(26.73 to 33.94)       | 29.79<br>(26.73 to 34.24)       | 29.46<br>(26.73 to 34.60)       | 28.46<br>(26.73 to 34.60)       | 27.55<br>(26.73 to 34.60)       | 27.14<br>(26.73 to 34.60)       | 26.63<br>(26.73 to 34.60)       | 26.10<br>(26.73 to 34.60)       |
| Pakistan                                                              | 0.79<br>(0.70 to 0.90)          | 0.79<br>(0.67 to 0.86)          | 0.79<br>(0.66 to 0.84)          | 0.79<br>(0.67 to 0.86)          | 0.79<br>(0.69 to 0.89)          | 0.79<br>(0.71 to 0.91)          | 0.79<br>(0.71 to 0.92)          | 0.79<br>(0.71 to 0.91)          | 0.79<br>(0.68 to 0.87)          | 0.79<br>(0.65 to 0.84)          |
| Palenstine                                                            | 4.26<br>(4.17 to 4.88)          | 4.26<br>(4.06 to 4.74)          | 4.26<br>(3.94 to 4.61)          | 4.26<br>(3.87 to 4.53)          | 4.26<br>(3.76 to 4.39)          | 4.26<br>(3.62 to 4.21)          | 4.26<br>(3.46 to 4.00)          | 4.26<br>(3.24 to 3.81)          | 4.26<br>(3.23 to 3.72)          | 4.26<br>(3.13 to 3.57)          |
| Qatar                                                                 | 0.05<br>(0.04 to 0.07)          | 0.05<br>(0.04 to 0.07)          | 0.06<br>(0.04 to 0.08)          | 0.06<br>(0.04 to 0.08)          | 0.06<br>(0.04 to 0.08)          | 0.06<br>(0.04 to 0.08)          | 0.06<br>(0.04 to 0.08)          | 0.06<br>(0.04 to 0.08)          | 0.06<br>(0.04 to 0.08)          | 0.06<br>(0.04 to 0.08)          |
| Saudi Arabia                                                          | 14.21<br>(10.41 to 19.29)       | 14.21<br>(10.37 to 19.21)       | 14.21<br>(10.29 to 18.99)       | 14.21<br>(10.14 to 18.66)       | 14.21<br>(10.05 to 18.27)       | 14.21<br>(10.10 to 18.24)       | 14.21<br>(10.02 to 17.98)       | 14.21<br>(9.90 to 17.50)        | 14.21<br>(9.86 to 17.31)        | 14.21<br>(9.85 to 17.40)        |
| Sudan                                                                 | 18.78<br>(16.89 to 20.95)       | 19.02<br>(17.09 to 21.19)       | 19.27<br>(17.40 to 21.57)       | 19.77<br>(17.82 to 21.99)       | 20.15<br>(18.14 to 22.44)       | 20.47<br>(18.42 to 22.73)       | 20.68<br>(18.58 to 22.90)       | 20.80<br>(18.70 to 23.09)       | 21.05<br>(18.24 to 23.29)       | 21.38<br>(19.12 to 23.67)       |
| Syria                                                                 | 6.46<br>(5.50 to 7.60)          | 6.45<br>(5.52 to 7.61)          | 6.45<br>(5.49 to 7.58)          | 6.45<br>(5.52 to 7.60)          | 6.44<br>(5.51 to 7.58)          | 6.44<br>(5.54 to 7.46)          | 6.44<br>(5.54 to 7.46)          | 6.44<br>(5.50 to 7.28)          | 6.44<br>(5.48 to 7.24)          | 6.44<br>(5.48 to 7.21)          |
| Tunisia                                                               | 4.70<br>(2.99 to 7.20)          | 4.52<br>(2.96 to 6.97)          | 4.44<br>(2.89 to 6.67)          | 4.33<br>(2.82 to 6.39)          | 4.21<br>(2.76 to 6.21)          | 4.09<br>(2.70 to 5.91)          | 3.98<br>(2.63 to 5.73)          | 3.87<br>(2.56 to 5.66)          | 3.75<br>(2.49 to 5.41)          | 3.64<br>(2.45 to 5.31)          |
| Turkey                                                                | 69.65<br>(58.78 to 82.05)       | 67.67<br>(57.40 to 79.90)       | 66.04<br>(56.50 to 78.71)       | 64.06<br>(56.21 to 78.01)       | 61.96<br>(55.48 to 76.96)       | 59.82<br>(54.18 to 74.93)       | 57.64<br>(52.39 to 72.58)       | 55.49<br>(50.80 to 70.03)       | 53.34<br>(48.58 to 67.38)       | 51.22<br>(45.88 to 64.29)       |
| United Arab Emirates                                                  | 0.27<br>(0.24 to 0.29)          | 0.28<br>(0.25 to 0.30)          | 0.29<br>(0.27 to 0.32)          | 0.30<br>(0.29 to 0.34)          | 0.30<br>(0.31 to 0.37)          | 0.30<br>(0.32 to 0.39)          | 0.30<br>(0.36 to 0.43)          | 0.30<br>(0.39 to 0.47)          | 0.30<br>(0.42 to 0.51)          | 0.30<br>(0.40 to 0.53)          |
| Yemen                                                                 | 22.93<br>(21.41 to 24.64)       | 22.93<br>(20.91 to 24.03)       | 22.93<br>(20.28 to 23.43)       | 22.93<br>(19.84 to 22.77)       | 22.93<br>(19.35 to 22.20)       | 22.93<br>(18.90 to 21.65)       | 22.93<br>(18.38 to 21.08)       | 22.93<br>(17.80 to 20.47)       | 22.93<br>(17.24 to 19.93)       | 22.93<br>(16.64 to 19.51)       |
| <b>South Asia</b>                                                     | 217.52<br>(201.16 to 233.64)    | 219.98<br>(197.88 to 232.47)    | 219.98<br>(197.92 to 230.41)    | 219.98<br>(195.16 to 228.26)    | 219.98<br>(194.03 to 225.23)    | 219.98<br>(192.43 to 221.78)    | 219.98<br>(190.62 to 220.75)    | 219.98<br>(189.40 to 218.54)    | 219.98<br>(187.06 to 215.89)    | 219.98<br>(185.33 to 214.73)    |
| <b>South Asia</b>                                                     | 217.52<br>(201.16 to 233.64)    | 219.98<br>(197.88 to 232.47)    | 219.98<br>(197.92 to 230.41)    | 219.98<br>(195.16 to 228.26)    | 219.98<br>(194.03 to 225.23)    | 219.98<br>(192.43 to 221.78)    | 219.98<br>(190.62 to 220.75)    | 219.98<br>(189.40 to 218.54)    | 219.98<br>(187.06 to 215.89)    | 219.98<br>(185.33 to 214.73)    |
| Bangladesh                                                            | 238.01<br>(222.22 to 255.05)    | 234.18<br>(219.07 to 250.96)    | 230.25<br>(215.38 to 247.08)    | 226.24<br>(212.90 to 243.41)    | 222.69<br>(209.26 to 238.56)    | 219.34<br>(206.03 to 234.78)    | 216.26<br>(204.40 to 232.32)    | 213.50<br>(203.12 to 229.50)    | 211.00<br>(202.12 to 229.57)    | 208.75<br>(202.92 to 229.57)    |
| Bhutan                                                                | 1.44<br>(1.39 to 1.50)          | 1.43<br>(1.38 to 1.48)          | 1.43<br>(1.38 to 1.48)          | 1.43<br>(1.38 to 1.48)          | 1.43<br>(1.38 to 1.48)          | 1.43<br>(1.37 to 1.47)          | 1.43<br>(1.37 to 1.46)          | 1.43<br>(1.36 to 1.45)          | 1.43<br>(1.34 to 1.43)          | 1.43<br>(1.34 to 1.43)          |
| India                                                                 | 1673.89<br>(1539.74 to 1825.24) | 1654.76<br>(1520.14 to 1802.93) | 1640.25<br>(1510.14 to 1788.01) | 1623.37<br>(1492.60 to 1766.52) | 1607.20<br>(1480.44 to 1746.92) | 1589.42<br>(1466.41 to 1729.05) | 1569.71<br>(1451.50 to 1702.79) | 1551.01<br>(1432.96 to 1678.11) | 1527.26<br>(1410.52 to 1648.44) | 1504.34<br>(1391.16 to 1622.15) |
| Nepal                                                                 | 213.45<br>(205.31 to 221.22)    | 213.45<br>(205.31 to 221.68)    | 213.45<br>(205.31 to 221.68)    | 213.45<br>(205.66 to 222.18)    | 214.40<br>(206.22 to 222.96)    | 215.87<br>(207.59 to 224.44)    | 217.72<br>(209.52 to 226.45)    | 220.38<br>(212.24 to 229.12)    | 223.76<br>(215.94 to 232.36)    | 227.90<br>(218.41 to 236.40)    |
| Pakistan                                                              | 695.71<br>(644.54 to 754.93)    | 698.33<br>(647.37 to 756.39)    | 701.13<br>(650.62 to 759.43)    | 703.89<br>(654.10 to 762.22)    | 706.68<br>(658.61 to 764.95)    | 709.49<br>(660.71 to 772.59)    | 712.29<br>(662.71 to 776.94)    | 715.06<br>(664.62 to 781.36)    | 717.86<br>(667.19 to 776.94)    | 720.60<br>(669.51 to 779.97)    |
| <b>Sub-Saharan Africa</b>                                             | 28.94<br>(25.39 to 33.09)       | 28.94<br>(25.36 to 33.02)       | 28.94<br>(25.48 to 33.01)       | 28.94<br>(25.53 to 33.01)       | 28.94<br>(25.64 to 33.01)       | 28.94<br>(25.84 to 33.18)       | 28.94<br>(26.03 to 33.34)       | 28.94<br>(26.33 to 33.55)       | 28.94<br>(26.63 to 33.43)       | 28.94<br>(26.83 to 33.58)       |
| <b>Southern Sub-Saharan Africa</b>                                    | 28.94<br>(25.39 to 33.09)       | 28.94<br>(25.36 to 33.02)       | 28.94<br>(25.48 to 33.01)       | 28.94<br>(25.53 to 33.01)       | 28.94<br>(25.64 to 33.01)       | 28.94<br>(25.84 to 33.18)       | 28.94<br>(26.03 to 33.34)       | 28.94<br>(26.33 to 33.55)       | 28.94<br>(26.63 to 33.43)       | 28.94<br>(26.83 to 33.58)       |
| Botswana                                                              | 1.22<br>(1.12 to 1.32)          | 1.24<br>(1.13 to 1.37)          | 1.25<br>(1.14 to 1.37)          | 1.25<br>(1.15 to 1.38)          | 1.25<br>(1.15 to 1.38)          | 1.25<br>(1.17 to 1.39)          | 1.25<br>(1.17 to 1.41)          | 1.25<br>(1.18 to 1.40)          | 1.25<br>(1.18 to 1.42)          | 1.25<br>(1.19 to 1.42)          |
| Lesotho                                                               | 0.81<br>(0.67 to 0.98)          | 0.82<br>(0.68 to 0.99)          | 0.83<br>(0.69 to 1.01)          | 0.84<br>(0.70 to 1.01)          | 0.85<br>(0.71 to 1.04)          | 0.85<br>(0.71 to 1.04)          | 0.87<br>(0.72 to 1.05)          | 0.88<br>(0.73 to 1.06)          | 0.90<br>(0.74 to 1.08)          | 0.91<br>(0.74 to 1.10)          |
| Namibia                                                               | 19.34<br>(17.29 to 21.69)       | 19.26<br>(17.20 to 21.59)       | 19.21<br>(17.18 to 21.51)       | 19.17<br>(17.18 to 21.43)       | 19.14<br>(17.14 to 21.39)       | 19.17<br>(17.12 to 21.42)       | 19.27<br>(17.14 to 21.47)       | 19.40<br>(17.45 to 21.48)       | 19.45<br>(17.49 to 21.55)       | 19.42<br>(17.45 to 21.59)       |
| South Africa                                                          | 0.66<br>(0.55 to 0.78)          | 0.64<br>(0.54 to 0.76)          | 0.64<br>(0.53 to 0.74)          | 0.64<br>(0.51 to 0.72)          | 0.64<br>(0.50 to 0.70)          | 0.64<br>(0.49 to 0.68)          | 0.64<br>(0.47 to 0.66)          | 0.64<br>(0.46 to 0.65)          | 0.64<br>(0.46 to 0.62)          | 0.64<br>(0.45 to 0.62)          |
| Swaziland                                                             | 6.00<br>(5.07 to 6.91)          | 6.00<br>(5.07 to 6.91)          | 6.00<br>(5.10 to 7.28)          | 6.00<br>(5.21 to 7.49)          | 6.00<br>(5.20 to 7.49)          | 6.00<br>(5.20 to 7.79)          | 6.00<br>(5.20 to 7.79)          | 6.00<br>(5.20 to 7.79)          | 6.00<br>(5.20 to 7.79)          | 6.00<br>(5.20 to 7.79)          |
| Zimbabwe                                                              | 326.42<br>(291.16 to 368.02)    | 326.32<br>(291.16 to 367.31)    | 326.27<br>(291.16 to 367.44)    | 325.74<br>(292.09 to 366.86)    | 324.92<br>(292.77 to 365.84)    | 323.35<br>(294.40 to 365.96)    | 321.81<br>(292.76 to 365.03)    | 320.36<br>(292.13 to 364.24)    | 318.91<br>(292.58 to 359.05)    | 317.46<br>(293.80 to 357.41)    |
| <b>Western Sub-Saharan Africa</b>                                     | 326.42<br>(291.16 to 368.02)    | 326.32<br>(291.16 to 367.31)    | 326.27<br>(291.16 to 367.44)    | 325.74<br>(292.09 to 366.86)    | 324.92<br>(292.77 to 365.84)    | 323.35<br>(294.40 to 365.96)    | 321.81<br>(292.76 to 365.03)    | 320.36<br>(292.13 to 364.24)    | 318.91<br>(292.58 to 359.05)    | 317.46<br>(293.80 to 357.41)    |
| Benin                                                                 | 6.17<br>(6.26 to 7.42)          | 6.17<br>(6.22 to 7.37)          | 6.17<br>(6.18 to 7.33)          | 6.17<br>(6.09 to 7.23)          | 6.17<br>(6.02 to 7.16)          | 6.17<br>(6.01 to 7.15)          | 6.17<br>(5.99 to 7.13)          | 6.17<br>(5.99 to 7.12)          | 6.17<br>(5.99 to 7.13)          | 6.17<br>(5.99 to 7.11)          |
| Burkina Faso                                                          | 11.81<br>(10.71 to 13.02)       | 11.74<br>(10.75 to 12.98)       | 11.74<br>(10.71 to 12.88)       | 11.74<br>(10.69 to 12.89)       | 11.74<br>(10.68 to 12.87)       | 11.74<br>(10.64 to 12.86)       | 11.74<br>(10.60 to 12.81)       | 11.74<br>(10.53 to 12.72)       | 11.74<br>(10.41 to 12.53)       | 11.74<br>(10.29 to 12.39)       |
| Cameroon                                                              | 13.83<br>(12.90 to 14.85)       | 13.66<br>(12.76 to 14.70)       | 13.43<br>(12.64 to 14.54)       | 13.21<br>(12.54 to 14.42)       | 13.02<br>(12.43 to 14.32)       | 12.84<br>(12.32 to 14.20)       | 12.67<br>(12.25 to 14.11)       | 12.51<br>(12.10 to 14.03)       | 12.36<br>(12.08 to 13.91)       | 12.26<br>(12.02 to 13.86)       |
| Cape Verde                                                            | 0.26<br>(0.22 to 0.30)          | 0.26<br>(0.23 to 0.31)          | 0.24<br>(0.20 to 0.28)          | 0.22<br>(0.19 to 0.26)          | 0.21<br>(0.17 to 0.23)          | 0.20<br>(0.16 to 0.22)          | 0.19<br>(0.16 to 0.20)          | 0.19<br>(0.15 to 0.19)          | 0.18<br>(0.14 to 0.18)          | 0.15<br>(0.13 to 0.17)          |
| Chad                                                                  | 12.35<br>(11                    |                                 |                                 |                                 |                                 |                                 |                                 |                                 |                                 |                                 |

Appendix Table 18A. Stillbirths (in thousands) by location, 1970-1979

|                                  | 1970                      | 1971                      | 1972                      | 1973                      | 1974                      | 1975                      | 1976                      | 1977                      | 1978                      | 1979                      |
|----------------------------------|---------------------------|---------------------------|---------------------------|---------------------------|---------------------------|---------------------------|---------------------------|---------------------------|---------------------------|---------------------------|
| Zambia                           | 9.17<br>(8.66 to 9.72)    | 9.18<br>(8.68 to 9.73)    | 9.17<br>(8.66 to 9.72)    | 9.19<br>(8.68 to 9.73)    | 9.24<br>(8.72 to 9.78)    | 9.34<br>(8.80 to 9.89)    | 9.39<br>(8.86 to 9.95)    | 9.55<br>(9.02 to 10.12)   | 9.75<br>(9.20 to 10.32)   | 9.89<br>(9.33 to 10.49)   |
| Central Sub-Saharan Africa       | 84.11<br>(81.45 to 87.01) | 84.33<br>(81.68 to 87.15) | 84.89<br>(82.27 to 87.76) | 85.11<br>(82.53 to 88.02) | 85.27<br>(82.72 to 88.23) | 86.18<br>(83.66 to 89.13) | 86.75<br>(84.27 to 89.67) | 87.07<br>(84.60 to 89.90) | 87.76<br>(85.27 to 90.60) | 88.39<br>(85.84 to 91.20) |
| Angola                           | 18.37<br>(17.52 to 19.29) | 18.53<br>(17.69 to 19.43) | 18.79<br>(17.97 to 19.73) | 19.07<br>(18.24 to 20.06) | 19.42<br>(18.56 to 20.44) | 19.97<br>(19.09 to 21.01) | 20.56<br>(19.65 to 21.62) | 21.01<br>(20.06 to 22.07) | 21.46<br>(20.49 to 22.55) | 21.96<br>(20.96 to 23.06) |
| Central African Republic         | 4.69<br>(4.39 to 5.03)    | 4.74<br>(4.44 to 5.07)    | 4.82<br>(4.52 to 5.17)    | 4.90<br>(4.58 to 5.25)    | 4.99<br>(4.66 to 5.35)    | 5.07<br>(4.74 to 5.44)    | 5.12<br>(4.80 to 5.50)    | 5.18<br>(4.83 to 5.53)    | 5.18<br>(4.85 to 5.54)    | 5.22<br>(4.89 to 5.59)    |
| Congo                            | 2.66<br>(2.50 to 2.85)    | 2.66<br>(2.50 to 2.84)    | 2.67<br>(2.50 to 2.85)    | 2.66<br>(2.49 to 2.85)    | 2.65<br>(2.48 to 2.83)    | 2.63<br>(2.47 to 2.82)    | 2.61<br>(2.45 to 2.79)    | 2.59<br>(2.43 to 2.78)    | 2.58<br>(2.42 to 2.76)    | 2.57<br>(2.40 to 2.74)    |
| Democratic Republic of the Congo | 56.01<br>(54.81 to 57.30) | 56.15<br>(54.96 to 57.43) | 56.49<br>(55.28 to 57.78) | 56.49<br>(55.32 to 57.79) | 56.39<br>(55.22 to 57.68) | 56.81<br>(55.62 to 58.08) | 56.87<br>(55.65 to 58.15) | 56.79<br>(55.59 to 58.06) | 57.06<br>(55.84 to 58.35) | 57.20<br>(55.91 to 58.50) |
| Equatorial Guinea                | 0.97<br>(0.91 to 1.04)    | 0.89<br>(0.83 to 0.95)    | 0.80<br>(0.75 to 0.86)    | 0.71<br>(0.67 to 0.76)    | 0.63<br>(0.59 to 0.67)    | 0.55<br>(0.51 to 0.59)    | 0.51<br>(0.47 to 0.54)    | 0.47<br>(0.44 to 0.51)    | 0.45<br>(0.42 to 0.48)    | 0.44<br>(0.41 to 0.47)    |
| Gabon                            | 1.80<br>(1.31 to 1.50)    | 1.36<br>(1.27 to 1.45)    | 1.31<br>(1.23 to 1.41)    | 1.27<br>(1.18 to 1.36)    | 1.21<br>(1.13 to 1.29)    | 1.15<br>(1.08 to 1.23)    | 1.09<br>(1.02 to 1.17)    | 1.06<br>(0.99 to 1.13)    | 1.03<br>(0.97 to 1.10)    | 1.01<br>(0.95 to 1.08)    |

Appendix Table 18B. Stillbirths (in thousands) by location, 1988-1995

|                                               | 1988  | 1989  | 1990  | 1991  | 1992  | 1993  | 1994  | 1995  |
|-----------------------------------------------|-------|-------|-------|-------|-------|-------|-------|-------|
| <b>Global</b>                                 | 441.3 | 407.6 | 369.7 | 357.0 | 347.0 | 337.0 | 327.0 | 317.0 |
| <b>High SDI</b>                               | 181.3 | 167.8 | 154.3 | 149.7 | 145.1 | 140.5 | 135.9 | 131.3 |
| <b>High-mid SDI</b>                           | 107.4 | 102.1 | 97.8  | 93.5  | 89.2  | 84.9  | 80.6  | 76.3  |
| <b>Mid-mid SDI</b>                            | 103.3 | 101.6 | 99.9  | 98.2  | 96.5  | 94.8  | 93.1  | 91.4  |
| <b>Low-mid SDI</b>                            | 104.4 | 103.7 | 103.0 | 102.3 | 101.6 | 100.9 | 100.2 | 99.5  |
| <b>Low SDI</b>                                | 41.3  | 40.2  | 39.1  | 38.0  | 36.9  | 35.8  | 34.7  | 33.6  |
| <b>High-income North America</b>              | 17.0  | 16.3  | 15.6  | 15.0  | 14.4  | 13.8  | 13.2  | 12.6  |
| <b>Canada</b>                                 | 17.0  | 16.3  | 15.6  | 15.0  | 14.4  | 13.8  | 13.2  | 12.6  |
| <b>United States</b>                          | 0.0   | 0.0   | 0.0   | 0.0   | 0.0   | 0.0   | 0.0   | 0.0   |
| <b>Europe</b>                                 | 15.0  | 14.2  | 13.4  | 12.7  | 12.0  | 11.3  | 10.6  | 9.9   |
| <b>Western Europe</b>                         | 15.0  | 14.2  | 13.4  | 12.7  | 12.0  | 11.3  | 10.6  | 9.9   |
| <b>Central Europe and Eastern Europe</b>      | 0.0   | 0.0   | 0.0   | 0.0   | 0.0   | 0.0   | 0.0   | 0.0   |
| <b>Asia</b>                                   | 1.0   | 1.0   | 1.0   | 1.0   | 1.0   | 1.0   | 1.0   | 1.0   |
| <b>South-Eastern Asia</b>                     | 1.0   | 1.0   | 1.0   | 1.0   | 1.0   | 1.0   | 1.0   | 1.0   |
| <b>South-Central Asia</b>                     | 0.0   | 0.0   | 0.0   | 0.0   | 0.0   | 0.0   | 0.0   | 0.0   |
| <b>South-South-Eastern Asia</b>               | 0.0   | 0.0   | 0.0   | 0.0   | 0.0   | 0.0   | 0.0   | 0.0   |
| <b>Latin America and the Caribbean</b>        | 1.0   | 1.0   | 1.0   | 1.0   | 1.0   | 1.0   | 1.0   | 1.0   |
| <b>Latin America</b>                          | 1.0   | 1.0   | 1.0   | 1.0   | 1.0   | 1.0   | 1.0   | 1.0   |
| <b>Caribbean</b>                              | 0.0   | 0.0   | 0.0   | 0.0   | 0.0   | 0.0   | 0.0   | 0.0   |
| <b>Middle East and North Africa</b>           | 0.0   | 0.0   | 0.0   | 0.0   | 0.0   | 0.0   | 0.0   | 0.0   |
| <b>Middle East</b>                            | 0.0   | 0.0   | 0.0   | 0.0   | 0.0   | 0.0   | 0.0   | 0.0   |
| <b>North Africa</b>                           | 0.0   | 0.0   | 0.0   | 0.0   | 0.0   | 0.0   | 0.0   | 0.0   |
| <b>Sub-Saharan Africa</b>                     | 0.0   | 0.0   | 0.0   | 0.0   | 0.0   | 0.0   | 0.0   | 0.0   |
| <b>Sub-Saharan Africa (excl. high income)</b> | 0.0   | 0.0   | 0.0   | 0.0   | 0.0   | 0.0   | 0.0   | 0.0   |
| <b>High income</b>                            | 0.0   | 0.0   | 0.0   | 0.0   | 0.0   | 0.0   | 0.0   | 0.0   |
| <b>Upper middle income</b>                    | 0.0   | 0.0   | 0.0   | 0.0   | 0.0   | 0.0   | 0.0   | 0.0   |
| <b>Lower middle income</b>                    | 0.0   | 0.0   | 0.0   | 0.0   | 0.0   | 0.0   | 0.0   | 0.0   |
| <b>Low income</b>                             | 0.0   | 0.0   | 0.0   | 0.0   | 0.0   | 0.0   | 0.0   | 0.0   |



Appendix Table 1B8. Stillbirths (in thousands) by location, 1980-1995

|                                   | 1980             | 1981             | 1982             | 1983             | 1984             | 1985             | 1986             | 1987             | 1988             | 1989             | 1990             | 1991             | 1992             | 1993             | 1994             | 1995             |
|-----------------------------------|------------------|------------------|------------------|------------------|------------------|------------------|------------------|------------------|------------------|------------------|------------------|------------------|------------------|------------------|------------------|------------------|
| <b>North America</b>              | 1 525            | 1 599            | 1 635            | 1 666            | 1 695            | 1 724            | 1 752            | 1 780            | 1 808            | 1 836            | 1 864            | 1 892            | 1 920            | 1 948            | 1 976            | 2 004            |
| United States                     | (1 318 to 1 525) | (1 348 to 1 599) | (1 378 to 1 635) | (1 408 to 1 666) | (1 438 to 1 695) | (1 468 to 1 724) | (1 498 to 1 752) | (1 528 to 1 780) | (1 558 to 1 808) | (1 588 to 1 836) | (1 618 to 1 864) | (1 648 to 1 892) | (1 678 to 1 920) | (1 708 to 1 948) | (1 738 to 1 976) | (1 768 to 2 004) |
| <b>Europe</b>                     | 4 838            | 4 844            | 4 850            | 4 856            | 4 862            | 4 868            | 4 874            | 4 880            | 4 886            | 4 892            | 4 898            | 4 904            | 4 910            | 4 916            | 4 922            | 4 928            |
| United Kingdom                    | (4 612 to 4 838) | (4 612 to 4 844) | (4 612 to 4 850) | (4 612 to 4 856) | (4 612 to 4 862) | (4 612 to 4 868) | (4 612 to 4 874) | (4 612 to 4 880) | (4 612 to 4 886) | (4 612 to 4 892) | (4 612 to 4 898) | (4 612 to 4 904) | (4 612 to 4 910) | (4 612 to 4 916) | (4 612 to 4 922) | (4 612 to 4 928) |
| <b>Eastern Sub-Saharan Africa</b> | 279 284          | 290 300          | 301 318          | 312 329          | 326 343          | 340 357          | 354 371          | 368 385          | 382 400          | 396 414          | 410 428          | 424 442          | 438 456          | 452 470          | 466 484          | 480 498          |
| Burundi                           | (45 92 to 1 131) | (46 96 to 1 131) | (48 00 to 1 131) | (49 04 to 1 131) | (50 08 to 1 131) | (51 12 to 1 131) | (52 16 to 1 131) | (53 20 to 1 131) | (54 24 to 1 131) | (55 28 to 1 131) | (56 32 to 1 131) | (57 36 to 1 131) | (58 40 to 1 131) | (59 44 to 1 131) | (60 48 to 1 131) | (61 52 to 1 131) |
| Cameroon                          | (45 78 to 8 089) | (45 78 to 8 089) | (45 78 to 8 089) | (45 78 to 8 089) | (45 78 to 8 089) | (45 78 to 8 089) | (45 78 to 8 089) | (45 78 to 8 089) | (45 78 to 8 089) | (45 78 to 8 089) | (45 78 to 8 089) | (45 78 to 8 089) | (45 78 to 8 089) | (45 78 to 8 089) | (45 78 to 8 089) | (45 78 to 8 089) |
| DRC                               | (45 78 to 8 089) | (45 78 to 8 089) | (45 78 to 8 089) | (45 78 to 8 089) | (45 78 to 8 089) | (45 78 to 8 089) | (45 78 to 8 089) | (45 78 to 8 089) | (45 78 to 8 089) | (45 78 to 8 089) | (45 78 to 8 089) | (45 78 to 8 089) | (45 78 to 8 089) | (45 78 to 8 089) | (45 78 to 8 089) | (45 78 to 8 089) |
| Ethiopia                          | (45 78 to 8 089) | (45 78 to 8 089) | (45 78 to 8 089) | (45 78 to 8 089) | (45 78 to 8 089) | (45 78 to 8 089) | (45 78 to 8 089) | (45 78 to 8 089) | (45 78 to 8 089) | (45 78 to 8 089) | (45 78 to 8 089) | (45 78 to 8 089) | (45 78 to 8 089) | (45 78 to 8 089) | (45 78 to 8 089) | (45 78 to 8 089) |
| Kenya                             | (45 78 to 8 089) | (45 78 to 8 089) | (45 78 to 8 089) | (45 78 to 8 089) | (45 78 to 8 089) | (45 78 to 8 089) | (45 78 to 8 089) | (45 78 to 8 089) | (45 78 to 8 089) | (45 78 to 8 089) | (45 78 to 8 089) | (45 78 to 8 089) | (45 78 to 8 089) | (45 78 to 8 089) | (45 78 to 8 089) | (45 78 to 8 089) |
| Madagascar                        | (45 78 to 8 089) | (45 78 to 8 089) | (45 78 to 8 089) | (45 78 to 8 089) | (45 78 to 8 089) | (45 78 to 8 089) | (45 78 to 8 089) | (45 78 to 8 089) | (45 78 to 8 089) | (45 78 to 8 089) | (45 78 to 8 089) | (45 78 to 8 089) | (45 78 to 8 089) | (45 78 to 8 089) | (45 78 to 8 089) | (45 78 to 8 089) |
| Malawi                            | (45 78 to 8 089) | (45 78 to 8 089) | (45 78 to 8 089) | (45 78 to 8 089) | (45 78 to 8 089) | (45 78 to 8 089) | (45 78 to 8 089) | (45 78 to 8 089) | (45 78 to 8 089) | (45 78 to 8 089) | (45 78 to 8 089) | (45 78 to 8 089) | (45 78 to 8 089) | (45 78 to 8 089) | (45 78 to 8 089) | (45 78 to 8 089) |
| Mozambique                        | (45 78 to 8 089) | (45 78 to 8 089) | (45 78 to 8 089) | (45 78 to 8 089) | (45 78 to 8 089) | (45 78 to 8 089) | (45 78 to 8 089) | (45 78 to 8 089) | (45 78 to 8 089) | (45 78 to 8 089) | (45 78 to 8 089) | (45 78 to 8 089) | (45 78 to 8 089) | (45 78 to 8 089) | (45 78 to 8 089) | (45 78 to 8 089) |
| Rwanda                            | (45 78 to 8 089) | (45 78 to 8 089) | (45 78 to 8 089) | (45 78 to 8 089) | (45 78 to 8 089) | (45 78 to 8 089) | (45 78 to 8 089) | (45 78 to 8 089) | (45 78 to 8 089) | (45 78 to 8 089) | (45 78 to 8 089) | (45 78 to 8 089) | (45 78 to 8 089) | (45 78 to 8 089) | (45 78 to 8 089) | (45 78 to 8 089) |
| Tanzania                          | (45 78 to 8 089) | (45 78 to 8 089) | (45 78 to 8 089) | (45 78 to 8 089) | (45 78 to 8 089) | (45 78 to 8 089) | (45 78 to 8 089) | (45 78 to 8 089) | (45 78 to 8 089) | (45 78 to 8 089) | (45 78 to 8 089) | (45 78 to 8 089) | (45 78 to 8 089) | (45 78 to 8 089) | (45 78 to 8 089) | (45 78 to 8 089) |
| Uganda                            | (45 78 to 8 089) | (45 78 to 8 089) | (45 78 to 8 089) | (45 78 to 8 089) | (45 78 to 8 089) | (45 78 to 8 089) | (45 78 to 8 089) | (45 78 to 8 089) | (45 78 to 8 089) | (45 78 to 8 089) | (45 78 to 8 089) | (45 78 to 8 089) | (45 78 to 8 089) | (45 78 to 8 089) | (45 78 to 8 089) | (45 78 to 8 089) |
| Zambia                            | (45 78 to 8 089) | (45 78 to 8 089) | (45 78 to 8 089) | (45 78 to 8 089) | (45 78 to 8 089) | (45 78 to 8 089) | (45 78 to 8 089) | (45 78 to 8 089) | (45 78 to 8 089) | (45 78 to 8 089) | (45 78 to 8 089) | (45 78 to 8 089) | (45 78 to 8 089) | (45 78 to 8 089) | (45 78 to 8 089) | (45 78 to 8 089) |
| <b>Central Sub-Saharan Africa</b> | 89 173           | 90 180           | 91 187           | 92 194           | 93 201           | 94 208           | 95 215           | 96 222           | 97 229           | 98 236           | 99 243           | 100 250          | 101 257          | 102 264          | 103 271          | 104 278          |
| Angola                            | (21 00 to 8 089) | (21 00 to 8 089) | (21 00 to 8 089) | (21 00 to 8 089) | (21 00 to 8 089) | (21 00 to 8 089) | (21 00 to 8 089) | (21 00 to 8 089) | (21 00 to 8 089) | (21 00 to 8 089) | (21 00 to 8 089) | (21 00 to 8 089) | (21 00 to 8 089) | (21 00 to 8 089) | (21 00 to 8 089) | (21 00 to 8 089) |
| Central African Republic          | (4 50 to 8 089)  | (4 50 to 8 089)  | (4 50 to 8 089)  | (4 50 to 8 089)  | (4 50 to 8 089)  | (4 50 to 8 089)  | (4 50 to 8 089)  | (4 50 to 8 089)  | (4 50 to 8 089)  | (4 50 to 8 089)  | (4 50 to 8 089)  | (4 50 to 8 089)  | (4 50 to 8 089)  | (4 50 to 8 089)  | (4 50 to 8 089)  | (4 50 to 8 089)  |
| Congo                             | (2 25 to 8 089)  | (2 25 to 8 089)  | (2 25 to 8 089)  | (2 25 to 8 089)  | (2 25 to 8 089)  | (2 25 to 8 089)  | (2 25 to 8 089)  | (2 25 to 8 089)  | (2 25 to 8 089)  | (2 25 to 8 089)  | (2 25 to 8 089)  | (2 25 to 8 089)  | (2 25 to 8 089)  | (2 25 to 8 089)  | (2 25 to 8 089)  | (2 25 to 8 089)  |
| Democratic Republic of the Congo  | (15 00 to 8 089) | (15 00 to 8 089) | (15 00 to 8 089) | (15 00 to 8 089) | (15 00 to 8 089) | (15 00 to 8 089) | (15 00 to 8 089) | (15 00 to 8 089) | (15 00 to 8 089) | (15 00 to 8 089) | (15 00 to 8 089) | (15 00 to 8 089) | (15 00 to 8 089) | (15 00 to 8 089) | (15 00 to 8 089) | (15 00 to 8 089) |
| Equatorial Guinea                 | (0 50 to 8 089)  | (0 50 to 8 089)  | (0 50 to 8 089)  | (0 50 to 8 089)  | (0 50 to 8 089)  | (0 50 to 8 089)  | (0 50 to 8 089)  | (0 50 to 8 089)  | (0 50 to 8 089)  | (0 50 to 8 089)  | (0 50 to 8 089)  | (0 50 to 8 089)  | (0 50 to 8 089)  | (0 50 to 8 089)  | (0 50 to 8 089)  | (0 50 to 8 089)  |
| Gabon                             | (0 50 to 8 089)  | (0 50 to 8 089)  | (0 50 to 8 089)  | (0 50 to 8 089)  | (0 50 to 8 089)  | (0 50 to 8 089)  | (0 50 to 8 089)  | (0 50 to 8 089)  | (0 50 to 8 089)  | (0 50 to 8 089)  | (0 50 to 8 089)  | (0 50 to 8 089)  | (0 50 to 8 089)  | (0 50 to 8 089)  | (0 50 to 8 089)  | (0 50 to 8 089)  |

| Appendix Table 18C. Stillbirths (in thousands) by location, 1990-2005 |                      |                      |                      |                      |                      |                      |                      |                      |                      |                      |
|-----------------------------------------------------------------------|----------------------|----------------------|----------------------|----------------------|----------------------|----------------------|----------------------|----------------------|----------------------|----------------------|
|                                                                       | 1996                 | 1997                 | 1998                 | 1999                 | 2000                 | 2001                 | 2002                 | 2003                 | 2004                 | 2005                 |
| <b>Global</b>                                                         | 2974.77              | 2808.78              | 2795.94              | 2749.49              | 2749.49              | 2701.27              | 2657.52              | 2619.80              | 2577.86              | 2528.38              |
| <b>High SDI</b>                                                       | (2800.72 to 3164.77) | (2741.70 to 3092.78) | (2690.92 to 3022.95) | (2645.46 to 2963.89) | (2603.73 to 2905.98) | (2560.94 to 2850.23) | (2521.72 to 2801.07) | (2489.24 to 2719.75) | (2453.94 to 2714.07) | (2409.90 to 2659.88) |
| <b>High-middle SDI</b>                                                | (51.48 to 54.65)     | (49.52 to 52.48)     | (47.85 to 50.69)     | (46.90 to 49.37)     | (45.40 to 47.71)     | (44.24 to 46.27)     | (42.93 to 44.81)     | (42.15 to 44.09)     | (40.96 to 42.88)     | (40.36 to 42.23)     |
| <b>Middle SDI</b>                                                     | 292.92               | 281.94               | 270.51               | 259.95               | 250.28               | 242.50               | 236.61               | 232.00               | 228.43               | 224.02               |
| <b>Low-middle SDI</b>                                                 | (272.24 to 315.29)   | (262.72 to 302.47)   | (252.75 to 288.79)   | (243.83 to 276.63)   | (236.03 to 264.97)   | (229.44 to 256.45)   | (224.58 to 249.22)   | (220.99 to 243.86)   | (217.94 to 239.44)   | (213.96 to 234.62)   |
| <b>Low SDI</b>                                                        | (589.79 to 671.98)   | (564.35 to 641.90)   | (542.99 to 613.67)   | (523.95 to 589.13)   | (506.65 to 566.28)   | (491.74 to 547.44)   | (478.04 to 530.61)   | (466.92 to 517.01)   | (457.45 to 505.40)   | (445.63 to 491.30)   |
| <b>High-income</b>                                                    | 1539.24              | 1512.82              | 1488.13              | 1468.03              | 1451.15              | 1430.15              | 1410.15              | 1391.81              | 1368.72              | 1340.36              |
| <b>High-income North America</b>                                      | (1438.40 to 1650.97) | (1416.40 to 1620.59) | (1394.42 to 1591.84) | (1378.85 to 1569.14) | (1364.73 to 1547.49) | (1345.01 to 1521.29) | (1327.27 to 1498.00) | (1311.47 to 1477.63) | (1293.70 to 1451.71) | (1266.40 to 1419.80) |
| <b>Canada</b>                                                         | 459.14               | 460.39               | 462.05               | 461.13               | 464.19               | 463.57               | 461.94               | 460.57               | 457.40               | 454.11               |
| <b>Greenland</b>                                                      | (442.42 to 478.66)   | (443.42 to 479.73)   | (445.32 to 482.41)   | (446.01 to 482.41)   | (445.59 to 483.05)   | (444.63 to 481.08)   | (443.63 to 479.54)   | (442.74 to 478.18)   | (439.74 to 476.18)   | (436.92 to 472.92)   |
| <b>United States</b>                                                  | 42.70                | 41.67                | 40.77                | 39.90                | 39.00                | 38.02                | 37.39                | 37.20                | 36.62                | 36.55                |
| <b>Other high-income</b>                                              | (41.53 to 43.92)     | (40.43 to 42.86)     | (39.58 to 41.97)     | (38.92 to 40.99)     | (38.04 to 39.98)     | (37.09 to 38.95)     | (36.43 to 38.41)     | (35.82 to 38.22)     | (35.46 to 37.58)     | (35.46 to 37.57)     |
| <b>Other high-income North America</b>                                | 14.34                | 13.95                | 13.50                | 13.31                | 13.50                | 13.75                | 13.95                | 14.06                | 14.26                | 14.36                |
| <b>Other high-income North America</b>                                | (13.34 to 14.66)     | (13.30 to 14.60)     | (13.21 to 14.43)     | (13.21 to 14.43)     | (12.95 to 14.15)     | (12.55 to 13.74)     | (12.47 to 13.66)     | (12.43 to 13.67)     | (12.30 to 13.45)     | (12.50 to 13.74)     |
| <b>Other high-income North America</b>                                | 0.84                 | 0.81                 | 0.78                 | 0.75                 | 0.73                 | 0.73                 | 0.73                 | 0.73                 | 0.73                 | 0.76                 |
| <b>Other high-income North America</b>                                | (0.82 to 0.85)       | (0.80 to 0.82)       | (0.77 to 0.79)       | (0.74 to 0.76)       | (0.72 to 0.74)       | (0.72 to 0.74)       | (0.72 to 0.74)       | (0.72 to 0.74)       | (0.72 to 0.74)       | (0.72 to 0.74)       |
| <b>Other high-income North America</b>                                | 0.01                 | 0.01                 | 0.01                 | 0.01                 | 0.01                 | 0.01                 | 0.01                 | 0.01                 | 0.01                 | 0.01                 |
| <b>Other high-income North America</b>                                | (0.01 to 0.01)       | (0.01 to 0.01)       | (0.01 to 0.01)       | (0.01 to 0.01)       | (0.01 to 0.01)       | (0.01 to 0.01)       | (0.01 to 0.01)       | (0.01 to 0.01)       | (0.01 to 0.01)       | (0.01 to 0.01)       |
| <b>Other high-income North America</b>                                | 13.28                | 13.12                | 13.16                | 13.05                | 12.76                | 12.39                | 12.31                | 12.28                | 12.11                | 12.32                |
| <b>Other high-income North America</b>                                | (12.66 to 13.93)     | (12.52 to 13.83)     | (12.46 to 13.80)     | (12.45 to 13.66)     | (12.21 to 13.41)     | (11.81 to 13.00)     | (11.73 to 12.93)     | (11.68 to 12.93)     | (11.57 to 12.70)     | (11.35 to 12.93)     |
| <b>Other high-income North America</b>                                | 0.94                 | 0.91                 | 0.86                 | 0.86                 | 0.87                 | 0.87                 | 0.87                 | 0.87                 | 0.87                 | 0.91                 |
| <b>Other high-income North America</b>                                | (0.87 to 1.02)       | (0.85 to 0.98)       | (0.81 to 0.94)       | (0.82 to 0.95)       | (0.80 to 0.93)       | (0.80 to 0.92)       | (0.81 to 0.94)       | (0.81 to 0.92)       | (0.88 to 1.02)       | (0.93 to 1.08)       |
| <b>Other high-income North America</b>                                | 0.75                 | 0.72                 | 0.69                 | 0.69                 | 0.67                 | 0.67                 | 0.69                 | 0.71                 | 0.75                 | 0.81                 |
| <b>Other high-income North America</b>                                | (0.68 to 0.82)       | (0.66 to 0.82)       | (0.63 to 0.85)       | (0.63 to 0.85)       | (0.61 to 0.73)       | (0.61 to 0.73)       | (0.62 to 0.75)       | (0.62 to 0.75)       | (0.65 to 0.82)       | (0.73 to 0.88)       |
| <b>Other high-income North America</b>                                | 0.20                 | 0.19                 | 0.19                 | 0.19                 | 0.19                 | 0.18                 | 0.19                 | 0.19                 | 0.20                 | 0.20                 |
| <b>Other high-income North America</b>                                | (0.19 to 0.20)       | (0.18 to 0.20)       | (0.18 to 0.20)       | (0.18 to 0.20)       | (0.18 to 0.20)       | (0.18 to 0.19)       | (0.18 to 0.19)       | (0.19 to 0.20)       | (0.19 to 0.20)       | (0.19 to 0.20)       |
| <b>Other high-income North America</b>                                | 5.38                 | 5.29                 | 5.29                 | 5.29                 | 5.29                 | 5.29                 | 5.29                 | 5.29                 | 5.29                 | 5.29                 |
| <b>Other high-income North America</b>                                | (6.07 to 6.70)       | (5.60 to 6.20)       | (5.33 to 5.89)       | (5.05 to 5.56)       | (4.78 to 5.26)       | (4.47 to 4.87)       | (4.24 to 4.61)       | (4.07 to 4.43)       | (3.81 to 4.15)       | (3.60 to 3.92)       |
| <b>Other high-income North America</b>                                | 0.04                 | 0.04                 | 0.04                 | 0.04                 | 0.04                 | 0.04                 | 0.04                 | 0.04                 | 0.04                 | 0.04                 |
| <b>Other high-income North America</b>                                | (0.04 to 0.04)       | (0.04 to 0.04)       | (0.04 to 0.04)       | (0.04 to 0.04)       | (0.04 to 0.04)       | (0.04 to 0.04)       | (0.04 to 0.04)       | (0.04 to 0.04)       | (0.04 to 0.04)       | (0.04 to 0.04)       |
| <b>Other high-income North America</b>                                | 3.46                 | 3.50                 | 3.46                 | 3.46                 | 3.46                 | 3.46                 | 3.46                 | 3.46                 | 3.46                 | 3.46                 |
| <b>Other high-income North America</b>                                | (3.64 to 3.08)       | (3.40 to 3.81)       | (3.27 to 3.67)       | (3.04 to 3.41)       | (2.87 to 3.21)       | (2.69 to 3.02)       | (2.58 to 2.90)       | (2.48 to 2.78)       | (2.37 to 2.66)       | (2.31 to 2.61)       |
| <b>Other high-income North America</b>                                | 0.16                 | 0.14                 | 0.13                 | 0.13                 | 0.12                 | 0.11                 | 0.11                 | 0.09                 | 0.09                 | 0.09                 |
| <b>Other high-income North America</b>                                | (0.15 to 0.16)       | (0.14 to 0.15)       | (0.13 to 0.14)       | (0.13 to 0.14)       | (0.12 to 0.13)       | (0.11 to 0.11)       | (0.10 to 0.10)       | (0.09 to 0.10)       | (0.09 to 0.09)       | (0.09 to 0.09)       |
| <b>Other high-income North America</b>                                | 2.31                 | 1.94                 | 1.90                 | 1.90                 | 1.83                 | 1.68                 | 1.55                 | 1.49                 | 1.34                 | 1.18                 |
| <b>Other high-income North America</b>                                | (2.18 to 2.51)       | (1.97 to 2.26)       | (1.82 to 2.09)       | (1.78 to 2.03)       | (1.71 to 1.95)       | (1.57 to 1.78)       | (1.46 to 1.65)       | (1.40 to 1.58)       | (1.26 to 1.41)       | (1.12 to 1.24)       |
| <b>Other high-income North America</b>                                | 14.64                | 14.32                | 13.80                | 13.41                | 13.11                | 12.84                | 12.39                | 12.28                | 11.69                | 11.69                |
| <b>Other high-income North America</b>                                | (14.24 to 15.05)     | (13.96 to 14.70)     | (13.46 to 14.16)     | (13.09 to 13.74)     | (12.81 to 13.42)     | (12.55 to 13.13)     | (12.11 to 12.66)     | (12.01 to 12.54)     | (11.74 to 12.26)     | (11.43 to 11.96)     |
| <b>Other high-income North America</b>                                | 0.00                 | 0.00                 | 0.00                 | 0.00                 | 0.00                 | 0.00                 | 0.00                 | 0.00                 | 0.00                 | 0.00                 |
| <b>Other high-income North America</b>                                | (0.00 to 0.00)       | (0.00 to 0.00)       | (0.00 to 0.00)       | (0.00 to 0.00)       | (0.00 to 0.00)       | (0.00 to 0.00)       | (0.00 to 0.00)       | (0.00 to 0.00)       | (0.00 to 0.00)       | (0.00 to 0.00)       |
| <b>Other high-income North America</b>                                | 0.17                 | 0.16                 | 0.15                 | 0.14                 | 0.14                 | 0.14                 | 0.14                 | 0.14                 | 0.14                 | 0.14                 |
| <b>Other high-income North America</b>                                | (0.17 to 0.18)       | (0.15 to 0.16)       | (0.15 to 0.16)       | (0.14 to 0.15)       | (0.14 to 0.15)       | (0.14 to 0.14)       | (0.13 to 0.14)       | (0.14 to 0.14)       | (0.14 to 0.14)       | (0.13 to 0.14)       |
| <b>Other high-income North America</b>                                | 0.43                 | 0.40                 | 0.37                 | 0.35                 | 0.33                 | 0.32                 | 0.32                 | 0.32                 | 0.32                 | 0.32                 |
| <b>Other high-income North America</b>                                | (0.39 to 0.48)       | (0.37 to 0.44)       | (0.34 to 0.41)       | (0.32 to 0.38)       | (0.30 to 0.36)       | (0.28 to 0.33)       | (0.26 to 0.31)       | (0.26 to 0.30)       | (0.25 to 0.30)       | (0.25 to 0.30)       |
| <b>Other high-income North America</b>                                | 0.04                 | 0.04                 | 0.04                 | 0.04                 | 0.03                 | 0.03                 | 0.03                 | 0.03                 | 0.03                 | 0.03                 |
| <b>Other high-income North America</b>                                | (0.04 to 0.04)       | (0.04 to 0.04)       | (0.04 to 0.04)       | (0.04 to 0.04)       | (0.03 to 0.03)       | (0.03 to 0.03)       | (0.03 to 0.03)       | (0.03 to 0.03)       | (0.03 to 0.03)       | (0.03 to 0.03)       |
| <b>Other high-income North America</b>                                | 0.17                 | 0.16                 | 0.15                 | 0.14                 | 0.14                 | 0.14                 | 0.14                 | 0.14                 | 0.14                 | 0.14                 |
| <b>Other high-income North America</b>                                | (0.16 to 0.19)       | (0.16 to 0.18)       | (0.15 to 0.17)       | (0.14 to 0.16)       | (0.13 to 0.15)       | (0.12 to 0.15)       | (0.12 to 0.14)       | (0.11 to 0.13)       | (0.11 to 0.13)       | (0.10 to 0.12)       |
| <b>Other high-income North America</b>                                | 0.11                 | 0.10                 | 0.10                 | 0.10                 | 0.09                 | 0.09                 | 0.09                 | 0.09                 | 0.09                 | 0.09                 |
| <b>Other high-income North America</b>                                | (0.10 to 0.11)       | (0.10 to 0.11)       | (0.10 to 0.11)       | (0.09 to 0.10)       | (0.09 to 0.10)       | (0.08 to 0.09)       | (0.08 to 0.09)       | (0.09 to 0.09)       | (0.09 to 0.10)       | (0.09 to 0.10)       |
| <b>Other high-income North America</b>                                | 3.45                 | 3.42                 | 3.42                 | 3.42                 | 3.42                 | 3.42                 | 3.42                 | 3.42                 | 3.42                 | 3.42                 |
| <b>Other high-income North America</b>                                | (3.38 to 3.53)       | (3.34 to 3.49)       | (3.27 to 3.42)       | (3.20 to 3.34)       | (3.13 to 3.48)       | (3.15 to 3.50)       | (3.09 to 3.23)       | (3.06 to 3.21)       | (3.00 to 3.15)       | (2.86 to 3.00)       |
| <b>Other high-income North America</b>                                | 1.60                 | 1.60                 | 1.60                 | 1.52                 | 1.46                 | 1.40                 | 1.34                 | 1.29                 | 1.22                 | 1.22                 |
| <b>Other high-income North America</b>                                | (1.67 to 1.70)       | (1.68 to 1.71)       | (1.59 to 1.61)       | (1.51 to 1.54)       | (1.45 to 1.47)       | (1.39 to 1.41)       | (1.33 to 1.36)       | (1.31 to 1.33)       | (1.28 to 1.30)       | (1.23 to 1.23)       |
| <b>Other high-income North America</b>                                | 0.31                 | 0.29                 | 0.28                 | 0.28                 | 0.27                 | 0.27                 | 0.27                 | 0.27                 | 0.27                 | 0.27                 |
| <b>Other high-income North America</b>                                | (0.31 to 0.32)       | (0.30 to 0.31)       | (0.28 to 0.30)       | (0.27 to 0.29)       | (0.27 to 0.28)       | (0.26 to 0.27)       | (0.26 to 0.27)       | (0.26 to 0.27)       | (0.26 to 0.27)       | (0.25 to 0.24)       |
| <b>Other high-income North America</b>                                | 0.01                 | 0.01                 | 0.01                 | 0.01                 | 0.01                 | 0.01                 | 0.01                 | 0.01                 | 0.01                 | 0.01                 |
| <b>Other high-income North America</b>                                | (0.01 to 0.01)       | (0.01 to 0.01)       | (0.01 to 0.01)       | (0.01 to 0.01)       | (0.01 to 0.01)       | (0.01 to 0.01)       | (0.01 to 0.01)       | (0.01 to 0.01)       | (0.01 to 0.01)       | (0.01 to 0.01)       |
| <b>Other high-income North America</b>                                | 0.18                 | 0.18                 | 0.18                 | 0.18                 | 0.18                 | 0.18                 | 0.18                 | 0.18                 | 0.18                 | 0.18                 |
| <b>Other high-income North America</b>                                | (0.17 to 0.19)       | (0.17 to 0.19)       | (0.17 to 0.19)       | (0.17 to 0.19)       | (0.17 to 0.19)       | (0.18 to 0.20)       | (0.18 to 0.20)       | (0.18 to 0.20)       | (0.17 to 0.19)       | (0.16 to 0.18)       |
| <b>Other high-income North America</b>                                | 0.32                 | 0.33                 | 0.34                 | 0.36                 | 0.36                 | 0.36                 | 0.38                 | 0.39                 | 0.38                 | 0.38                 |
| <b>Other high-income North America</b>                                | (0.22 to 0.45)       | (0.31 to 0.36)       | (0.32 to 0.37)       | (0.34 to 0.38)       | (0.34 to 0.39)       | (0.34 to 0.39)       | (0.35 to 0.41)       | (0.36 to 0.42)       | (0.35 to 0.41)       | (0.34 to 0.41)       |
| <b>Other high-income North America</b>                                | 1.60                 | 1.55                 | 1.46                 | 1.42                 | 1.31                 | 1.30                 | 1.24                 | 1.08                 | 1.02                 | 1.02                 |
| <b>Other high-income North America</b>                                | (1.48 to 1.75)       | (1.43 to 1.69)       | (1.33 to 1.58)       | (1.31 to 1.54)       | (1.21 to 1.42)       | (1.20 to 1.41)       | (1.15 to 1.34)       | (1.07 to 1.23)       | (1.00 to 1.16)       | (0.95 to 1.10)       |
| <b>Other high-income North America</b>                                | 0.01                 | 0.01                 | 0.01                 | 0.01                 | 0.01                 | 0.01                 | 0.01                 | 0.01                 | 0.01                 | 0.01                 |
| <b>Other high-income North America</b>                                | (0.01 to 0.01)       | (0.01 to 0.01)       | (0.01 to 0.01)       | (0.01 to 0.01)       | (0.01 to 0.01)       | (0.01 to 0.01)       | (0.01 to 0.01)       | (0.01 to 0.01)       | (0.01 to 0.01)       | (0.01 to 0.01)       |
| <b>Other high-income North America</b>                                | 0.02                 | 0.01                 | 0.01                 | 0.01                 | 0.01                 | 0.01                 | 0.01                 | 0.01                 | 0.01                 | 0.01                 |
| <b>Other high-income North America</b>                                | (0.02 to 0.02)       | (0.02 to 0.02)       | (0.01 to 0.01)       | (0.01 to 0.01)       | (0.01 to 0.01)       | (0.01 to 0.01)       | (0.01 to 0.01)       | (0.01 to 0.01)       | (0.01 to 0.01)       | (0.01 to 0.01)       |
| <b>Other high-income North America</b>                                | 0.91                 | 0.88                 | 0.85                 | 0.81                 | 0.73                 | 0.65                 | 0.59                 | 0.53                 | 0.47                 | 0.45                 |
| <b>Other high-income North America</b>                                | (0.80 to 0.83)       | (0.79 to 0.83)       | (0.72 to 0.85)       | (0.72 to 0.89)       | (0.66 to 0.81)       | (0.59 to 0.72)       | (0.53 to 0.65)       | (0.48 to 0.59)       | (0.43 to 0.52)       | (0.40 to 0.50)       |
| <b>Other high-income North America</b>                                | 0.13                 | 0.13                 | 0.13                 | 0.13                 | 0.12                 | 0.12                 | 0.11                 | 0.11                 | 0.11                 | 0.11                 |
| <b>Other high-income North America</b>                                | (0.13 to 0.14)       | (0.13 to 0.14)       | (0.13 to 0.13)       | (0.13 to 0.13)       | (0.12 to 0.13)       | (0.11 to 0.12)       | (0.11 to 0.12)       | (0.10 to 0.12)       | (0.10 to 0.11)       | (0.10 to 0.11)       |
| <b>Other high-income North America</b>                                | 0.35                 | 0.35                 | 0.34                 | 0.33                 | 0.33                 | 0.31                 | 0.30                 | 0.27                 | 0.26                 | 0.24                 |
| <b>Other high-income North America</b>                                | (0.34 to 0.36)       | (0.34 to 0.35)       | (0.34 to 0.35)       | (0.33 to 0.34)       | (0.32 to 0.34)       | (0.30 to 0.31)       | (0.29 to 0.31)       | (0.27 to 0.28)       | (0.25 to 0.26)       | (0.23 to 0.24)       |
| <b>Other high-income North America</b>                                | 0.79                 | 0.75                 | 0.71                 | 0.70                 | 0.70                 | 0.68                 | 0.73                 | 0.73                 | 0.73                 | 0.73                 |
| <b>Other high-income North America</b>                                | (0.75 to 0.84)       | (0.71 to 0.80)       | (0.68 to 0.76)       | (0.67 to 0.75)       | (0.67 to 0.74)       | (0.64 to 0.71)       | (0.69 to 0.77)       | (0.69 to 0.77)       | (0.68 to 0.77)       | (0.68 to 0.77)       |
| <b>Other high-income North America</b>                                | 0.20                 | 0.20                 | 0.19                 | 0.19                 | 0.20                 | 0.21                 | 0.21                 | 0.21                 | 0.21                 | 0.20                 |



| Appendix Table 18C. Stillbirths (in thousands) by location, 1990-2005 |                              |                              |                              |                              |                              |                              |                              |                              |                              |                              |
|-----------------------------------------------------------------------|------------------------------|------------------------------|------------------------------|------------------------------|------------------------------|------------------------------|------------------------------|------------------------------|------------------------------|------------------------------|
|                                                                       | 1996                         | 1997                         | 1998                         | 1999                         | 2000                         | 2001                         | 2002                         | 2003                         | 2004                         | 2005                         |
| Azerbaijan                                                            | 2.50<br>(2.41 to 2.60)       | 2.33<br>(2.24 to 2.42)       | 2.19<br>(2.10 to 2.28)       | 2.05<br>(1.97 to 2.13)       | 1.91<br>(1.84 to 1.98)       | 1.81<br>(1.74 to 1.88)       | 1.80<br>(1.74 to 1.87)       | 1.81<br>(1.74 to 1.88)       | 2.01<br>(1.93 to 2.08)       | 2.13<br>(2.04 to 2.21)       |
| Georgia                                                               | 0.66<br>(0.63 to 0.70)       | 0.59<br>(0.59 to 0.66)       | 0.56<br>(0.56 to 0.62)       | 0.54<br>(0.54 to 0.60)       | 0.52<br>(0.52 to 0.58)       | 0.51<br>(0.51 to 0.56)       | 0.50<br>(0.50 to 0.56)       | 0.50<br>(0.50 to 0.56)       | 0.51<br>(0.48 to 0.53)       | 0.50<br>(0.47 to 0.52)       |
| Kazakhstan                                                            | 2.74<br>(2.64 to 2.84)       | 2.60<br>(2.51 to 2.69)       | 2.46<br>(2.38 to 2.54)       | 2.37<br>(2.30 to 2.45)       | 2.34<br>(2.27 to 2.41)       | 2.38<br>(2.31 to 2.44)       | 2.46<br>(2.40 to 2.52)       | 2.56<br>(2.50 to 2.62)       | 2.66<br>(2.61 to 2.72)       | 2.76<br>(2.71 to 2.80)       |
| Kyrgyzstan                                                            | 1.46<br>(1.35 to 1.67)       | 1.41<br>(1.48 to 1.59)       | 1.51<br>(1.41 to 1.51)       | 1.45<br>(1.35 to 1.45)       | 1.41<br>(1.31 to 1.41)       | 1.38<br>(1.28 to 1.38)       | 1.37<br>(1.27 to 1.37)       | 1.38<br>(1.28 to 1.38)       | 1.39<br>(1.29 to 1.39)       | 1.42<br>(1.32 to 1.42)       |
| Mongolia                                                              | 0.69<br>(0.67 to 0.72)       | 0.66<br>(0.63 to 0.69)       | 0.62<br>(0.60 to 0.65)       | 0.59<br>(0.57 to 0.62)       | 0.57<br>(0.55 to 0.59)       | 0.56<br>(0.53 to 0.57)       | 0.55<br>(0.51 to 0.55)       | 0.54<br>(0.50 to 0.54)       | 0.53<br>(0.50 to 0.54)       | 0.53<br>(0.51 to 0.55)       |
| Tajikistan                                                            | 2.65<br>(2.58 to 2.73)       | 2.63<br>(2.47 to 2.60)       | 2.60<br>(2.34 to 2.46)       | 2.62<br>(2.21 to 2.63)       | 2.67<br>(2.10 to 2.22)       | 2.71<br>(2.02 to 2.13)       | 2.72<br>(1.97 to 2.07)       | 2.73<br>(1.97 to 2.07)       | 2.73<br>(1.91 to 1.98)       | 2.73<br>(1.84 to 1.93)       |
| Turkmenistan                                                          | 1.65<br>(1.62 to 1.67)       | 1.58<br>(1.55 to 1.60)       | 1.51<br>(1.49 to 1.54)       | 1.46<br>(1.44 to 1.49)       | 1.41<br>(1.38 to 1.43)       | 1.36<br>(1.34 to 1.39)       | 1.36<br>(1.30 to 1.35)       | 1.29<br>(1.27 to 1.31)       | 1.26<br>(1.24 to 1.28)       | 1.24<br>(1.22 to 1.26)       |
| Uzbekistan                                                            | 6.68<br>(6.44 to 6.94)       | 6.39<br>(6.16 to 6.65)       | 6.09<br>(5.86 to 6.34)       | 5.83<br>(5.62 to 6.07)       | 5.63<br>(5.47 to 5.91)       | 5.62<br>(5.42 to 5.85)       | 5.63<br>(5.42 to 5.85)       | 5.63<br>(5.42 to 5.85)       | 5.63<br>(5.46 to 5.89)       | 5.63<br>(5.46 to 5.89)       |
| Latin America and Caribbean                                           | 126.38<br>(115.34 to 138.94) | 121.90<br>(111.67 to 133.54) | 117.42<br>(108.02 to 127.85) | 113.15<br>(104.70 to 122.74) | 108.55<br>(100.86 to 117.20) | 104.49<br>(97.42 to 112.37)  | 101.00<br>(94.57 to 108.21)  | 97.74<br>(91.67 to 104.43)   | 94.47<br>(88.74 to 100.84)   | 91.22<br>(85.85 to 97.33)    |
| Central Latin America                                                 | 46.61<br>(44.07 to 49.27)    | 45.22<br>(42.73 to 47.73)    | 43.91<br>(41.51 to 46.34)    | 42.71<br>(40.41 to 45.10)    | 41.51<br>(39.32 to 43.87)    | 40.39<br>(38.30 to 42.66)    | 39.37<br>(37.33 to 41.53)    | 38.39<br>(36.36 to 40.45)    | 37.28<br>(35.36 to 39.25)    | 36.18<br>(34.30 to 38.16)    |
| Colombia                                                              | 10.87<br>(9.78 to 12.08)     | 10.60<br>(9.52 to 11.79)     | 10.42<br>(9.38 to 11.58)     | 10.30<br>(9.28 to 11.41)     | 10.16<br>(9.16 to 11.25)     | 10.04<br>(9.04 to 11.12)     | 9.94<br>(8.94 to 10.99)      | 9.84<br>(8.81 to 10.86)      | 9.73<br>(8.71 to 10.73)      | 9.60<br>(8.71 to 10.60)      |
| Costa Rica                                                            | 0.59<br>(0.57 to 0.62)       | 0.59<br>(0.56 to 0.61)       | 0.57<br>(0.55 to 0.59)       | 0.54<br>(0.53 to 0.58)       | 0.54<br>(0.52 to 0.56)       | 0.55<br>(0.51 to 0.55)       | 0.55<br>(0.51 to 0.55)       | 0.54<br>(0.49 to 0.53)       | 0.51<br>(0.48 to 0.52)       | 0.49<br>(0.47 to 0.51)       |
| El Salvador                                                           | 1.55<br>(1.52 to 1.59)       | 1.50<br>(1.46 to 1.57)       | 1.43<br>(1.34 to 1.57)       | 1.39<br>(1.32 to 1.39)       | 1.27<br>(1.24 to 1.31)       | 1.20<br>(1.17 to 1.23)       | 1.14<br>(1.10 to 1.17)       | 1.08<br>(1.02 to 1.11)       | 1.01<br>(0.92 to 1.04)       | 0.95<br>(0.85 to 0.97)       |
| Guatemala                                                             | 5.48<br>(4.93 to 6.07)       | 5.34<br>(4.83 to 5.88)       | 5.16<br>(4.69 to 5.65)       | 4.98<br>(4.60 to 5.42)       | 4.79<br>(4.40 to 5.19)       | 4.64<br>(4.27 to 5.03)       | 4.48<br>(4.13 to 4.84)       | 4.33<br>(4.00 to 4.66)       | 4.16<br>(3.85 to 4.48)       | 4.01<br>(3.71 to 4.32)       |
| Honduras                                                              | 2.31<br>(2.32 to 2.34)       | 2.27<br>(2.29 to 2.28)       | 2.21<br>(2.20 to 2.22)       | 2.16<br>(2.15 to 2.18)       | 2.11<br>(2.10 to 2.12)       | 2.06<br>(2.05 to 2.08)       | 2.02<br>(2.02 to 2.03)       | 1.99<br>(1.97 to 1.99)       | 1.94<br>(1.92 to 1.95)       | 1.91<br>(1.91 to 1.93)       |
| Mexico                                                                | 18.66<br>(17.88 to 19.44)    | 18.07<br>(17.33 to 18.80)    | 17.00<br>(16.81 to 18.23)    | 16.47<br>(16.33 to 17.66)    | 15.93<br>(15.84 to 17.08)    | 15.43<br>(15.34 to 16.55)    | 14.88<br>(14.84 to 15.99)    | 14.31<br>(14.34 to 15.44)    | 13.81<br>(13.82 to 14.88)    | 13.18<br>(13.14 to 14.35)    |
| Nicaragua                                                             | 1.52<br>(1.53 to 1.54)       | 1.52<br>(1.50 to 1.54)       | 1.49<br>(1.45 to 1.49)       | 1.42<br>(1.40 to 1.44)       | 1.39<br>(1.35 to 1.39)       | 1.37<br>(1.30 to 1.34)       | 1.36<br>(1.25 to 1.34)       | 1.34<br>(1.21 to 1.24)       | 1.32<br>(1.12 to 1.19)       | 1.28<br>(1.12 to 1.15)       |
| Panama                                                                | 0.46<br>(0.44 to 0.49)       | 0.46<br>(0.44 to 0.48)       | 0.46<br>(0.44 to 0.48)       | 0.45<br>(0.44 to 0.47)       | 0.44<br>(0.43 to 0.46)       | 0.43<br>(0.42 to 0.45)       | 0.43<br>(0.41 to 0.44)       | 0.42<br>(0.41 to 0.44)       | 0.43<br>(0.42 to 0.44)       | 0.43<br>(0.42 to 0.44)       |
| Venezuela                                                             | 5.18<br>(4.78 to 5.39)       | 4.98<br>(4.59 to 5.16)       | 4.67<br>(4.41 to 4.93)       | 4.48<br>(4.27 to 4.74)       | 4.30<br>(4.14 to 4.58)       | 4.17<br>(4.02 to 4.45)       | 4.17<br>(3.96 to 4.38)       | 4.17<br>(3.92 to 4.34)       | 4.13<br>(3.79 to 4.21)       | 4.00<br>(3.64 to 4.05)       |
| Andean Latin America                                                  | 19.92<br>(17.35 to 23.10)    | 18.90<br>(16.51 to 21.78)    | 17.91<br>(15.70 to 20.60)    | 17.01<br>(14.95 to 19.40)    | 16.18<br>(14.28 to 18.36)    | 15.42<br>(13.64 to 17.47)    | 14.71<br>(13.07 to 16.58)    | 14.11<br>(12.90 to 15.80)    | 13.56<br>(12.16 to 15.07)    | 12.99<br>(11.67 to 14.41)    |
| Bolivia                                                               | 6.33<br>(5.30 to 7.69)       | 6.12<br>(5.12 to 7.40)       | 5.89<br>(4.92 to 7.08)       | 5.69<br>(4.69 to 7.07)       | 5.49<br>(4.48 to 6.51)       | 5.29<br>(4.30 to 6.21)       | 5.09<br>(4.08 to 5.90)       | 4.92<br>(3.76 to 5.41)       | 4.72<br>(3.65 to 5.41)       | 4.51<br>(3.51 to 5.11)       |
| Ecuador                                                               | 4.13<br>(3.4 to 5.07)        | 3.99<br>(3.24 to 4.88)       | 3.85<br>(3.24 to 4.67)       | 3.72<br>(3.16 to 4.48)       | 3.60<br>(3.07 to 4.27)       | 3.46<br>(2.97 to 4.06)       | 3.31<br>(2.90 to 3.86)       | 3.22<br>(2.83 to 3.68)       | 3.11<br>(2.77 to 3.52)       | 2.99<br>(2.68 to 3.32)       |
| Peru                                                                  | 8.48<br>(8.21 to 10.92)      | 8.19<br>(7.68 to 10.10)      | 7.89<br>(7.15 to 9.33)       | 7.65<br>(6.73 to 8.62)       | 7.45<br>(6.38 to 8.07)       | 7.23<br>(6.08 to 7.57)       | 7.02<br>(5.80 to 7.16)       | 6.81<br>(5.55 to 6.78)       | 6.61<br>(5.39 to 6.49)       | 6.41<br>(5.20 to 6.26)       |
| Caribbean                                                             | 19.19<br>(16.64 to 22.32)    | 18.78<br>(16.42 to 22.03)    | 18.28<br>(16.15 to 21.70)    | 17.91<br>(15.78 to 21.33)    | 17.50<br>(15.50 to 20.72)    | 17.10<br>(15.48 to 20.55)    | 16.70<br>(15.42 to 20.39)    | 16.30<br>(15.33 to 20.37)    | 15.90<br>(15.26 to 20.31)    | 15.50<br>(15.17 to 20.20)    |
| Antigua and Barbuda                                                   | 0.01<br>(0.01 to 0.02)       | 0.01<br>(0.01 to 0.02)       | 0.01<br>(0.01 to 0.02)       | 0.01<br>(0.01 to 0.02)       | 0.01<br>(0.01 to 0.02)       | 0.01<br>(0.01 to 0.02)       | 0.01<br>(0.01 to 0.02)       | 0.01<br>(0.01 to 0.02)       | 0.01<br>(0.01 to 0.02)       | 0.01<br>(0.01 to 0.02)       |
| The Bahamas                                                           | 0.06<br>(0.06 to 0.07)       | 0.06<br>(0.06 to 0.07)       | 0.06<br>(0.06 to 0.07)       | 0.06<br>(0.06 to 0.06)       | 0.06<br>(0.06 to 0.06)       | 0.06<br>(0.06 to 0.06)       | 0.06<br>(0.06 to 0.07)       | 0.07<br>(0.07 to 0.07)       | 0.08<br>(0.07 to 0.08)       | 0.08<br>(0.08 to 0.09)       |
| Barbados                                                              | 0.03<br>(0.03 to 0.04)       | 0.03<br>(0.03 to 0.04)       | 0.03<br>(0.03 to 0.04)       | 0.03<br>(0.03 to 0.04)       | 0.03<br>(0.03 to 0.04)       | 0.03<br>(0.03 to 0.04)       | 0.03<br>(0.03 to 0.04)       | 0.03<br>(0.03 to 0.04)       | 0.03<br>(0.03 to 0.04)       | 0.03<br>(0.03 to 0.04)       |
| Belize                                                                | 0.09<br>(0.07 to 0.11)       | 0.09<br>(0.07 to 0.11)       | 0.10<br>(0.08 to 0.12)       | 0.10<br>(0.08 to 0.13)       | 0.11<br>(0.09 to 0.13)       | 0.11<br>(0.09 to 0.14)       | 0.11<br>(0.09 to 0.14)       | 0.11<br>(0.09 to 0.14)       | 0.11<br>(0.09 to 0.14)       | 0.11<br>(0.09 to 0.13)       |
| Bermuda                                                               | 0.01<br>(0.01 to 0.01)       | 0.01<br>(0.00 to 0.01)       | 0.01<br>(0.00 to 0.01)       | 0.01<br>(0.00 to 0.01)       | 0.01<br>(0.00 to 0.01)       | 0.01<br>(0.00 to 0.01)       | 0.01<br>(0.00 to 0.01)       | 0.01<br>(0.00 to 0.01)       | 0.01<br>(0.01 to 0.01)       | 0.01<br>(0.01 to 0.01)       |
| Cuba                                                                  | 1.60<br>(1.53 to 1.68)       | 1.64<br>(1.57 to 1.72)       | 1.64<br>(1.58 to 1.70)       | 1.68<br>(1.63 to 1.74)       | 1.80<br>(1.73 to 1.87)       | 1.93<br>(1.85 to 2.01)       | 1.97<br>(1.88 to 2.06)       | 1.85<br>(1.76 to 1.93)       | 1.68<br>(1.60 to 1.75)       | 1.49<br>(1.44 to 1.55)       |
| Dominica                                                              | 0.01<br>(0.01 to 0.02)       | 0.01<br>(0.01 to 0.02)       | 0.01<br>(0.01 to 0.02)       | 0.01<br>(0.01 to 0.02)       | 0.01<br>(0.01 to 0.02)       | 0.01<br>(0.01 to 0.02)       | 0.01<br>(0.01 to 0.02)       | 0.01<br>(0.01 to 0.02)       | 0.01<br>(0.01 to 0.02)       | 0.01<br>(0.01 to 0.02)       |
| Dominican Republic                                                    | 3.50<br>(3.16 to 3.86)       | 3.39<br>(3.06 to 3.75)       | 3.28<br>(2.86 to 3.64)       | 3.18<br>(2.86 to 3.53)       | 3.11<br>(2.80 to 3.42)       | 3.06<br>(2.76 to 3.38)       | 3.03<br>(2.72 to 3.34)       | 3.03<br>(2.73 to 3.36)       | 3.07<br>(2.76 to 3.41)       | 3.08<br>(2.74 to 3.44)       |
| Grenada                                                               | 0.02<br>(0.02 to 0.03)       | 0.02<br>(0.02 to 0.03)       | 0.02<br>(0.02 to 0.03)       | 0.02<br>(0.02 to 0.03)       | 0.02<br>(0.02 to 0.03)       | 0.02<br>(0.02 to 0.03)       | 0.02<br>(0.02 to 0.03)       | 0.02<br>(0.02 to 0.03)       | 0.02<br>(0.02 to 0.03)       | 0.02<br>(0.02 to 0.03)       |
| Guyana                                                                | 0.40<br>(0.37 to 0.43)       | 0.38<br>(0.36 to 0.41)       | 0.37<br>(0.34 to 0.40)       | 0.35<br>(0.32 to 0.38)       | 0.33<br>(0.30 to 0.36)       | 0.32<br>(0.30 to 0.34)       | 0.30<br>(0.28 to 0.33)       | 0.29<br>(0.27 to 0.31)       | 0.28<br>(0.26 to 0.28)       | 0.26<br>(0.26 to 0.28)       |
| Haiti                                                                 | 10.64<br>(8.60 to 13.17)     | 10.47<br>(8.51 to 13.07)     | 10.21<br>(8.37 to 12.99)     | 10.07<br>(8.14 to 12.70)     | 9.88<br>(7.89 to 12.22)      | 9.72<br>(7.76 to 12.10)      | 9.58<br>(7.78 to 12.05)      | 9.42<br>(7.78 to 12.19)      | 9.28<br>(7.77 to 12.36)      | 9.18<br>(8.05 to 12.52)      |
| Jamaica                                                               | 1.11<br>(1.02 to 1.20)       | 1.09<br>(1.01 to 1.16)       | 1.06<br>(0.92 to 1.14)       | 1.04<br>(0.97 to 1.11)       | 1.02<br>(0.92 to 1.08)       | 1.00<br>(0.94 to 1.04)       | 0.99<br>(0.92 to 1.00)       | 0.96<br>(0.88 to 1.00)       | 0.89<br>(0.86 to 0.88)       | 0.85<br>(0.84 to 0.88)       |
| Puerto Rico                                                           | 0.54<br>(0.52 to 0.56)       | 0.54<br>(0.48 to 0.53)       | 0.47<br>(0.45 to 0.50)       | 0.45<br>(0.43 to 0.47)       | 0.42<br>(0.40 to 0.44)       | 0.40<br>(0.38 to 0.42)       | 0.38<br>(0.36 to 0.42)       | 0.36<br>(0.34 to 0.37)       | 0.34<br>(0.33 to 0.36)       | 0.33<br>(0.32 to 0.34)       |
| Saint Lucia                                                           | 0.04<br>(0.04 to 0.05)       | 0.04<br>(0.04 to 0.04)       | 0.04<br>(0.04 to 0.04)       | 0.04<br>(0.04 to 0.04)       | 0.04<br>(0.04 to 0.04)       | 0.04<br>(0.04 to 0.04)       | 0.04<br>(0.04 to 0.04)       | 0.04<br>(0.04 to 0.04)       | 0.04<br>(0.04 to 0.04)       | 0.04<br>(0.04 to 0.04)       |
| Saint Vincent and the Grenadines                                      | 0.02<br>(0.02 to 0.03)       | 0.02<br>(0.02 to 0.03)       | 0.02<br>(0.02 to 0.03)       | 0.02<br>(0.02 to 0.03)       | 0.02<br>(0.02 to 0.03)       | 0.02<br>(0.02 to 0.03)       | 0.02<br>(0.02 to 0.03)       | 0.02<br>(0.02 to 0.03)       | 0.02<br>(0.02 to 0.03)       | 0.02<br>(0.02 to 0.03)       |
| Suriname                                                              | 0.24<br>(0.22 to 0.28)       | 0.25<br>(0.22 to 0.28)       | 0.25<br>(0.22 to 0.27)       | 0.24<br>(0.22 to 0.27)       | 0.24<br>(0.22 to 0.27)       | 0.23<br>(0.21 to 0.26)       | 0.23<br>(0.21 to 0.26)       | 0.23<br>(0.21 to 0.25)       | 0.22<br>(0.20 to 0.24)       | 0.21<br>(0.20 to 0.23)       |
| Trinidad and Tobago                                                   | 0.29<br>(0.27 to 0.31)       | 0.29<br>(0.27 to 0.31)       | 0.28<br>(0.26 to 0.31)       | 0.28<br>(0.26 to 0.31)       | 0.28<br>(0.25 to 0.30)       | 0.27<br>(0.25 to 0.30)       | 0.27<br>(0.25 to 0.30)       | 0.27<br>(0.25 to 0.30)       | 0.27<br>(0.24 to 0.29)       | 0.26<br>(0.24 to 0.29)       |
| Virgin Islands, U.S.                                                  | 0.01<br>(0.01 to 0.02)       | 0.01<br>(0.01 to 0.02)       | 0.01<br>(0.01 to 0.02)       | 0.01<br>(0.01 to 0.02)       | 0.01<br>(0.01 to 0.02)       | 0.01<br>(0.01 to 0.02)       | 0.01<br>(0.01 to 0.02)       | 0.01<br>(0.01 to 0.01)       | 0.01<br>(0.01 to 0.01)       | 0.01<br>(0.01 to 0.01)       |
| Tropical Latin America                                                | 40.67<br>(36.12 to 45.49)    | 38.81<br>(34.93 to 42.91)    | 36.93<br>(33.40 to 40.29)    | 35.14<br>(32.60 to 37.92)    | 32.95<br>(30.97 to 35.07)    | 30.92<br>(29.47 to 32.49)    | 29.21<br>(28.19 to 30.33)    | 27.64<br>(26.93 to 28.46)    | 26.09<br>(25.55 to 26.69)    | 24.62<br>(24.16 to 25.09)    |
| Brazil                                                                | 31.07<br>(28.74 to 33.35)    | 29.82<br>(27.45 to 32.44)    | 28.58<br>(26.43 to 30.84)    | 27.33<br>(25.43 to 29.31)    | 26.07<br>(24.66 to 27.58)    | 24.87<br>(23.84 to 25.90)    | 23.73<br>(22.87 to 24.60)    | 22.64<br>(22.02 to 23.26)    | 21.61<br>(21.22 to 22.00)    | 20.64<br>(20.29 to 21.00)    |
| Paraguay                                                              | 1.70<br>(1.33 to 2.14)       | 1.68<br>(1.33 to 2.03)       | 1.65<br>(1.32 to 2.03)       | 1.62<br>(1.31 to 1.96)       | 1.59<br>(1.29 to 1.91)       | 1.55<br>(1.28 to 1.86)       | 1.51<br>(1.25 to 1.76)       | 1.43<br>(1.21 to 1.67)       | 1.35<br>(1.16 to 1.58)       | 1.27<br>(1.08 to 1.48)       |
| Southeast Asia, East Asia, and Oceania                                | 447.33<br>(393.63 to 442.63) | 428.88<br>(375.28 to 420.68) | 410.40<br>(358.10 to 400.00) | 392.88<br>(342.50 to 381.28) | 375.92<br>(327.48 to 363.67) | 359.73<br>(313.97 to 347.79) | 343.69<br>(301.31 to 333.43) | 328.46<br>(289.25 to 319.68) | 313.94<br>(280.85 to 310.22) | 299.77<br>(273.75 to 301.69) |
| East Asia                                                             | 229.48<br>(209.82 to 250.87) | 220.81<br>(197.37 to 235.55) | 215.37<br>(185.26 to 220.23) | 209.98<br>(174.08 to 206.37) | 199.74<br>(164.12 to 194.31) | 189.20<br>(155.43 to 183.72) | 178.25<br>(147.07 to 173.69) | 167.15<br>(139.57 to 164.67) | 155.69<br>(135.77 to 159.36) | 147.09<br>(125.45 to 154.46) |
| China                                                                 | 192.61<br>(201.54 to 241.11) | 188.51<br>(188.51 to 225.23) | 181.81<br>(176.40 to 209.98) | 175.19<br>(165.43 to 186.19) | 169.34<br>(155.75 to 181.11) | 163.08<br>(147.31 to 173.88) | 157.09<br>(139.61 to 164.50) | 151.01<br>(132.60 to 155.96) | 145.04<br>(1                 |                              |

| Appendix Table 18C. Stillbirths (in thousands) by location, 1990-2005 |                                 |                                 |                                 |                                 |                                 |                                 |                                 |                                 |                                 |                                |                        |
|-----------------------------------------------------------------------|---------------------------------|---------------------------------|---------------------------------|---------------------------------|---------------------------------|---------------------------------|---------------------------------|---------------------------------|---------------------------------|--------------------------------|------------------------|
|                                                                       | 1996                            | 1997                            | 1998                            | 1999                            | 2000                            | 2001                            | 2002                            | 2003                            | 2004                            | 2005                           |                        |
| Tonga                                                                 | 0.04<br>(0.03 to 0.04)          | 0.04<br>(0.04 to 0.04)          | 0.04<br>(0.03 to 0.04)          | 0.04<br>(0.03 to 0.04)          | 0.04<br>(0.03 to 0.04)          | 0.04<br>(0.03 to 0.04)          | 0.04<br>(0.03 to 0.04)          | 0.04<br>(0.03 to 0.04)          | 0.04<br>(0.03 to 0.04)          | 0.04<br>(0.03 to 0.04)         | 0.04<br>(0.03 to 0.04) |
| Vanuatu                                                               | 0.13<br>(0.11 to 0.14)          | 0.13<br>(0.12 to 0.14)          | 0.13<br>(0.12 to 0.14)          | 0.13<br>(0.12 to 0.14)          | 0.13<br>(0.12 to 0.14)          | 0.13<br>(0.12 to 0.14)          | 0.13<br>(0.12 to 0.14)          | 0.13<br>(0.12 to 0.15)          | 0.14<br>(0.13 to 0.15)          | 0.14<br>(0.13 to 0.16)         |                        |
| <b>North Africa and Middle East</b>                                   | 209.21<br>(191.24 to 230.81)    | 205.56<br>(188.22 to 226.47)    | 202.24<br>(185.80 to 222.28)    | 199.26<br>(183.24 to 218.60)    | 196.41<br>(180.49 to 214.72)    | 194.35<br>(178.56 to 212.72)    | 191.98<br>(175.80 to 210.21)    | 189.30<br>(173.24 to 207.23)    | 186.20<br>(170.04 to 204.00)    | 182.95<br>(166.70 to 200.37)   |                        |
| <b>North Africa and Middle East</b>                                   | 209.21<br>(191.24 to 230.81)    | 205.56<br>(188.22 to 226.47)    | 202.24<br>(185.80 to 222.28)    | 199.26<br>(183.24 to 218.60)    | 196.41<br>(180.49 to 214.72)    | 194.35<br>(178.56 to 212.72)    | 191.98<br>(175.80 to 210.21)    | 189.30<br>(173.24 to 207.23)    | 186.20<br>(170.04 to 204.00)    | 182.95<br>(166.70 to 200.37)   |                        |
| Afghanistan                                                           | 20.07<br>(17.26 to 23.56)       | 20.26<br>(17.44 to 23.69)       | 20.32<br>(17.51 to 23.79)       | 20.43<br>(17.71 to 23.79)       | 20.68<br>(17.96 to 23.91)       | 21.45<br>(18.59 to 24.61)       | 21.45<br>(18.59 to 24.61)       | 22.07<br>(19.39 to 25.61)       | 22.48<br>(19.50 to 25.82)       | 22.54<br>(19.51 to 25.84)      |                        |
| Algeria                                                               | 23.94<br>(20.26 to 26.08)       | 24.08<br>(21.71 to 26.63)       | 24.90<br>(22.81 to 27.27)       | 25.72<br>(23.88 to 28.49)       | 26.49<br>(24.63 to 28.49)       | 26.58<br>(24.90 to 28.98)       | 26.58<br>(24.36 to 28.96)       | 26.58<br>(24.36 to 28.96)       | 26.58<br>(24.36 to 28.96)       | 26.58<br>(24.36 to 28.96)      |                        |
| Bahrain                                                               | 0.11<br>(0.11 to 0.12)          | 0.10<br>(0.10 to 0.10)          | 0.10<br>(0.10 to 0.10)          | 0.10<br>(0.10 to 0.10)          | 0.09<br>(0.09 to 0.09)          | 0.09<br>(0.09 to 0.09)          | 0.08<br>(0.08 to 0.08)          | 0.08<br>(0.08 to 0.08)          | 0.09<br>(0.09 to 0.09)          | 0.09<br>(0.09 to 0.09)         |                        |
| Egypt                                                                 | 31.94<br>(27.36 to 37.59)       | 30.25<br>(25.89 to 35.57)       | 29.36<br>(25.12 to 34.45)       | 29.01<br>(24.73 to 33.54)       | 28.64<br>(24.43 to 33.54)       | 28.64<br>(24.15 to 33.25)       | 27.99<br>(23.79 to 32.94)       | 27.99<br>(23.74 to 32.81)       | 27.99<br>(23.58 to 32.62)       | 27.99<br>(23.43 to 32.47)      |                        |
| Iran                                                                  | 17.15<br>(16.12 to 19.25)       | 16.13<br>(15.25 to 17.04)       | 15.34<br>(14.03 to 16.05)       | 14.83<br>(14.29 to 15.42)       | 14.54<br>(14.15 to 14.99)       | 14.51<br>(14.20 to 14.82)       | 14.59<br>(14.36 to 14.84)       | 14.63<br>(14.44 to 14.83)       | 14.68<br>(14.51 to 14.86)       | 14.71<br>(14.54 to 14.88)      |                        |
| Iraq                                                                  | 12.34<br>(10.58 to 14.52)       | 12.53<br>(10.72 to 14.72)       | 12.60<br>(10.79 to 14.78)       | 12.53<br>(10.62 to 14.67)       | 12.44<br>(10.62 to 14.57)       | 12.36<br>(10.57 to 14.54)       | 12.39<br>(10.53 to 14.58)       | 12.85<br>(10.96 to 15.14)       | 13.39<br>(11.36 to 15.72)       | 14.23<br>(12.02 to 16.65)      |                        |
| Jordan                                                                | 1.44<br>(1.32 to 1.56)          | 1.41<br>(1.31 to 1.54)          | 1.39<br>(1.28 to 1.51)          | 1.37<br>(1.26 to 1.48)          | 1.34<br>(1.24 to 1.46)          | 1.33<br>(1.22 to 1.44)          | 1.32<br>(1.22 to 1.44)          | 1.32<br>(1.22 to 1.44)          | 1.33<br>(1.22 to 1.44)          | 1.33<br>(1.22 to 1.44)         |                        |
| Kuwait                                                                | 0.30<br>(0.28 to 0.32)          | 0.32<br>(0.30 to 0.33)          | 0.32<br>(0.30 to 0.34)          | 0.30<br>(0.27 to 0.29)          | 0.30<br>(0.29 to 0.31)          | 0.30<br>(0.26 to 0.37)          | 0.32<br>(0.32 to 0.35)          | 0.32<br>(0.33 to 0.35)          | 0.36<br>(0.33 to 0.36)          | 0.35<br>(0.33 to 0.37)         |                        |
| Lebanon                                                               | 0.79<br>(0.75 to 0.84)          | 0.73<br>(0.70 to 0.74)          | 0.68<br>(0.65 to 0.72)          | 0.64<br>(0.61 to 0.67)          | 0.60<br>(0.58 to 0.64)          | 0.56<br>(0.53 to 0.59)          | 0.56<br>(0.54 to 0.55)          | 0.49<br>(0.47 to 0.52)          | 0.47<br>(0.45 to 0.47)          | 0.45<br>(0.44 to 0.47)         |                        |
| Libya                                                                 | 1.23<br>(1.06 to 1.45)          | 1.23<br>(1.05 to 1.44)          | 1.23<br>(1.05 to 1.44)          | 1.23<br>(1.04 to 1.44)          | 1.22<br>(1.04 to 1.42)          | 1.21<br>(1.04 to 1.42)          | 1.21<br>(1.03 to 1.42)          | 1.18<br>(1.01 to 1.39)          | 1.15<br>(0.98 to 1.35)          | 1.11<br>(0.94 to 1.30)         |                        |
| Monocco                                                               | 14.41<br>(14.13 to 14.70)       | 13.72<br>(13.46 to 14.39)       | 13.03<br>(12.74 to 13.65)       | 12.39<br>(12.15 to 12.65)       | 11.75<br>(11.52 to 12.02)       | 11.11<br>(10.88 to 11.36)       | 10.47<br>(10.24 to 10.70)       | 9.82<br>(9.60 to 10.04)         | 9.19<br>(8.97 to 9.41)          | 8.66<br>(8.39 to 8.82)         |                        |
| Pakistan                                                              | 0.71<br>(0.62 to 0.79)          | 0.71<br>(0.63 to 0.81)          | 0.73<br>(0.64 to 0.82)          | 0.73<br>(0.65 to 0.82)          | 0.73<br>(0.64 to 0.81)          | 0.73<br>(0.65 to 0.82)          | 0.73<br>(0.66 to 0.84)          | 0.73<br>(0.68 to 0.86)          | 0.73<br>(0.71 to 0.90)          | 0.73<br>(0.72 to 0.96)         |                        |
| Oman                                                                  | 1.41<br>(1.36 to 1.55)          | 1.39<br>(1.30 to 1.47)          | 1.39<br>(1.24 to 1.40)          | 1.37<br>(1.24 to 1.40)          | 1.34<br>(1.21 to 1.43)          | 1.33<br>(1.20 to 1.42)          | 1.32<br>(1.19 to 1.42)          | 1.32<br>(1.19 to 1.42)          | 1.32<br>(1.19 to 1.42)          | 1.32<br>(1.19 to 1.42)         |                        |
| Qatar                                                                 | 0.05<br>(0.05 to 0.06)          | 0.05<br>(0.05 to 0.06)          | 0.05<br>(0.05 to 0.06)          | 0.05<br>(0.05 to 0.06)          | 0.05<br>(0.05 to 0.06)          | 0.06<br>(0.05 to 0.06)          | 0.06<br>(0.05 to 0.06)          | 0.06<br>(0.06 to 0.07)          | 0.06<br>(0.06 to 0.07)          | 0.07<br>(0.06 to 0.07)         |                        |
| Saudi Arabia                                                          | 10.44<br>(8.81 to 12.45)        | 10.40<br>(8.84 to 12.08)        | 10.24<br>(8.86 to 11.79)        | 10.03<br>(8.83 to 11.40)        | 9.83<br>(8.81 to 11.01)         | 9.57<br>(8.67 to 10.56)         | 9.35<br>(8.56 to 10.23)         | 9.15<br>(8.34 to 9.79)          | 8.94<br>(7.99 to 9.25)          | 8.61<br>(7.61 to 8.66)         |                        |
| Sudan                                                                 | 23.66<br>(21.26 to 26.31)       | 23.91<br>(21.49 to 26.45)       | 23.91<br>(21.49 to 26.45)       | 23.75<br>(21.45 to 26.23)       | 23.25<br>(21.30 to 25.60)       | 22.80<br>(20.66 to 25.02)       | 22.43<br>(20.29 to 24.63)       | 21.91<br>(19.88 to 24.01)       | 21.42<br>(19.44 to 23.46)       | 20.99<br>(19.10 to 22.95)      |                        |
| Syria                                                                 | 4.45<br>(3.99 to 5.46)          | 4.45<br>(3.82 to 5.23)          | 4.45<br>(3.61 to 4.94)          | 4.45<br>(3.39 to 4.64)          | 4.45<br>(3.17 to 4.34)          | 4.45<br>(2.96 to 4.06)          | 4.45<br>(2.78 to 3.83)          | 4.45<br>(2.69 to 3.70)          | 4.45<br>(2.60 to 3.68)          | 4.45<br>(2.50 to 3.73)         |                        |
| Tunisia                                                               | 1.85<br>(1.72 to 1.98)          | 1.74<br>(1.60 to 1.89)          | 1.64<br>(1.51 to 1.77)          | 1.55<br>(1.44 to 1.67)          | 1.47<br>(1.37 to 1.57)          | 1.41<br>(1.30 to 1.45)          | 1.37<br>(1.25 to 1.37)          | 1.32<br>(1.26 to 1.38)          | 1.31<br>(1.30 to 1.42)          | 1.37<br>(1.30 to 1.43)         |                        |
| Turkey                                                                | 22.15<br>(18.99 to 26.06)       | 21.92<br>(18.26 to 25.06)       | 21.92<br>(17.30 to 23.71)       | 21.92<br>(16.27 to 27.34)       | 21.92<br>(15.40 to 21.13)       | 21.92<br>(14.92 to 20.53)       | 21.92<br>(14.42 to 19.96)       | 21.92<br>(14.09 to 19.46)       | 21.92<br>(13.53 to 19.70)       | 21.92<br>(12.83 to 17.76)      |                        |
| United Arab Emirates                                                  | 0.33<br>(0.31 to 0.36)          | 0.31<br>(0.29 to 0.33)          | 0.31<br>(0.28 to 0.32)          | 0.29<br>(0.27 to 0.31)          | 0.29<br>(0.26 to 0.30)          | 0.28<br>(0.26 to 0.30)          | 0.28<br>(0.27 to 0.30)          | 0.28<br>(0.28 to 0.32)          | 0.28<br>(0.30 to 0.34)          | 0.28<br>(0.30 to 0.34)         |                        |
| Yemen                                                                 | 19.37<br>(19.37 to 19.39)       | 19.22<br>(19.22 to 19.22)       | 19.22<br>(19.22 to 19.22)       | 19.22<br>(19.22 to 19.22)       | 19.22<br>(19.22 to 19.22)       | 19.22<br>(19.22 to 19.22)       | 19.22<br>(19.22 to 19.22)       | 19.22<br>(19.22 to 19.22)       | 19.22<br>(19.22 to 19.22)       | 19.22<br>(19.22 to 19.22)      |                        |
| <b>South Asia</b>                                                     | 1296.20<br>(1222.00 to 1378.71) | 1255.59<br>(1185.77 to 1333.08) | 1217.01<br>(1152.11 to 1287.72) | 1181.55<br>(1120.50 to 1243.60) | 1150.70<br>(1093.63 to 1209.77) | 1119.81<br>(1066.79 to 1173.48) | 1093.26<br>(1043.07 to 1141.69) | 1072.13<br>(1026.07 to 1115.41) | 1048.18<br>(1007.72 to 1088.85) | 1016.30<br>(978.81 to 1054.83) |                        |
| <b>South Asia</b>                                                     | 1296.20<br>(1222.00 to 1378.71) | 1255.59<br>(1185.77 to 1333.08) | 1217.01<br>(1152.11 to 1287.72) | 1181.55<br>(1120.50 to 1243.60) | 1150.70<br>(1093.63 to 1209.77) | 1119.81<br>(1066.79 to 1173.48) | 1093.26<br>(1043.07 to 1141.69) | 1072.13<br>(1026.07 to 1115.41) | 1048.18<br>(1007.72 to 1088.85) | 1016.30<br>(978.81 to 1054.83) |                        |
| Bangladesh                                                            | 136.39<br>(129.98 to 143.98)    | 129.49<br>(122.61 to 136.23)    | 124.24<br>(118.70 to 129.35)    | 117.57<br>(112.84 to 123.03)    | 112.44<br>(108.14 to 117.19)    | 107.88<br>(103.94 to 111.96)    | 103.82<br>(100.07 to 107.52)    | 100.03<br>(96.70 to 103.28)     | 96.37<br>(93.32 to 99.39)       | 92.73<br>(89.62 to 95.46)      |                        |
| Bhutan                                                                | 0.75<br>(0.73 to 0.78)          | 0.75<br>(0.70 to 0.75)          | 0.75<br>(0.68 to 0.73)          | 0.75<br>(0.66 to 0.70)          | 0.75<br>(0.63 to 0.68)          | 0.75<br>(0.61 to 0.65)          | 0.75<br>(0.58 to 0.62)          | 0.75<br>(0.55 to 0.59)          | 0.75<br>(0.49 to 0.53)          | 0.75<br>(0.49 to 0.53)         |                        |
| India                                                                 | 943.73<br>(882.06 to 1013.74)   | 917.13<br>(857.76 to 982.28)    | 892.25<br>(835.03 to 953.53)    | 867.88<br>(815.28 to 923.38)    | 845.69<br>(795.60 to 897.19)    | 823.18<br>(776.66 to 870.81)    | 804.64<br>(760.40 to 848.22)    | 790.38<br>(749.04 to 830.63)    | 771.53<br>(734.20 to 809.16)    | 746.00<br>(709.20 to 782.46)   |                        |
| Nepal                                                                 | 184.96<br>(178.20 to 191.54)    | 178.89<br>(172.51 to 185.98)    | 172.51<br>(166.42 to 174.64)    | 168.24<br>(162.53 to 174.64)    | 163.61<br>(160.54 to 169.25)    | 163.61<br>(158.14 to 169.25)    | 161.10<br>(155.88 to 166.50)    | 159.36<br>(153.88 to 164.57)    | 159.00<br>(152.20 to 164.20)    | 160.61<br>(155.20 to 164.57)   |                        |
| Pakistan                                                              | 844.41<br>(794.10 to 901.44)    | 850.43<br>(800.09 to 909.13)    | 858.26<br>(806.63 to 917.63)    | 857.42<br>(815.26 to 928.80)    | 877.88<br>(839.14 to 945.01)    | 877.88<br>(832.17 to 947.35)    | 877.88<br>(834.65 to 945.01)    | 877.88<br>(832.89 to 946.07)    | 877.88<br>(832.89 to 946.07)    | 877.88<br>(829.07 to 946.07)   |                        |
| <b>Sub-Saharan Africa</b>                                             | 25.05<br>(22.70 to 27.61)       | 24.94<br>(22.57 to 27.42)       | 24.94<br>(22.57 to 27.42)       | 25.10<br>(22.71 to 27.59)       | 25.40<br>(22.99 to 27.81)       | 25.58<br>(22.99 to 28.03)       | 25.85<br>(23.29 to 28.30)       | 26.37<br>(23.92 to 28.92)       | 27.02<br>(24.54 to 29.64)       | 27.84<br>(25.40 to 30.57)      |                        |
| <b>Southern Sub-Saharan Africa</b>                                    | 25.05<br>(22.70 to 27.61)       | 24.94<br>(22.57 to 27.42)       | 24.94<br>(22.57 to 27.42)       | 25.10<br>(22.71 to 27.59)       | 25.40<br>(22.99 to 27.81)       | 25.58<br>(22.99 to 28.03)       | 25.85<br>(23.29 to 28.30)       | 26.37<br>(23.92 to 28.92)       | 27.02<br>(24.54 to 29.64)       | 27.84<br>(25.40 to 30.57)      |                        |
| Botswana                                                              | 0.67<br>(0.56 to 0.81)          | 0.66<br>(0.56 to 0.80)          | 0.66<br>(0.55 to 0.79)          | 0.65<br>(0.55 to 0.77)          | 0.65<br>(0.55 to 0.76)          | 0.65<br>(0.54 to 0.75)          | 0.65<br>(0.53 to 0.74)          | 0.65<br>(0.52 to 0.72)          | 0.65<br>(0.51 to 0.70)          | 0.65<br>(0.50 to 0.68)         |                        |
| Lesotho                                                               | 1.35<br>(1.23 to 1.47)          | 1.35<br>(1.24 to 1.49)          | 1.37<br>(1.25 to 1.51)          | 1.39<br>(1.25 to 1.53)          | 1.39<br>(1.26 to 1.54)          | 1.39<br>(1.26 to 1.53)          | 1.39<br>(1.26 to 1.53)          | 1.39<br>(1.28 to 1.54)          | 1.40<br>(1.28 to 1.54)          | 1.40<br>(1.28 to 1.54)         |                        |
| Namibia                                                               | 0.82<br>(0.68 to 0.99)          | 0.80<br>(0.67 to 0.97)          | 0.79<br>(0.66 to 0.95)          | 0.78<br>(0.64 to 0.93)          | 0.76<br>(0.63 to 0.92)          | 0.74<br>(0.60 to 0.89)          | 0.72<br>(0.59 to 0.87)          | 0.72<br>(0.60 to 0.87)          | 0.73<br>(0.60 to 0.88)          | 0.73<br>(0.60 to 0.88)         |                        |
| South Africa                                                          | 13.74<br>(12.56 to 15.00)       | 13.46<br>(12.56 to 14.60)       | 13.31<br>(12.56 to 14.36)       | 13.19<br>(12.16 to 14.18)       | 13.14<br>(12.10 to 14.11)       | 13.00<br>(12.08 to 13.93)       | 12.84<br>(11.89 to 13.77)       | 12.77<br>(11.85 to 13.68)       | 12.74<br>(11.95 to 13.65)       | 12.83<br>(11.95 to 13.75)      |                        |
| Swaziland                                                             | 0.37<br>(0.32 to 0.45)          | 0.37<br>(0.32 to 0.45)          | 0.37<br>(0.32 to 0.45)          | 0.37<br>(0.34 to 0.46)          | 0.37<br>(0.35 to 0.47)          | 0.37<br>(0.35 to 0.48)          | 0.37<br>(0.35 to 0.48)          | 0.37<br>(0.36 to 0.48)          | 0.37<br>(0.36 to 0.48)          | 0.37<br>(0.38 to 0.50)         |                        |
| Zimbabwe                                                              | 8.10<br>(6.87 to 9.41)          | 8.24<br>(7.03 to 9.65)          | 8.42<br>(7.14 to 9.43)          | 8.42<br>(7.42 to 10.16)         | 8.42<br>(7.74 to 10.54)         | 8.42<br>(8.04 to 10.92)         | 8.42<br>(8.42 to 11.43)         | 8.42<br>(8.92 to 12.14)         | 8.42<br>(9.47 to 13.81)         | 8.42<br>(10.47 to 13.81)       |                        |
| <b>Western Sub-Saharan Africa</b>                                     | 399.15<br>(362.42 to 444.06)    | 405.71<br>(368.50 to 449.99)    | 413.07<br>(374.03 to 458.35)    | 422.35<br>(382.55 to 468.26)    | 432.37<br>(392.70 to 478.40)    | 439.92<br>(398.66 to 486.25)    | 446.47<br>(404.57 to 492.66)    | 451.97<br>(410.55 to 497.97)    | 454.36<br>(413.04 to 500.41)    | 455.12<br>(414.84 to 501.70)   |                        |
| Benin                                                                 | 7.05<br>(6.55 to 7.56)          | 7.05<br>(6.57 to 7.55)          | 7.05<br>(6.60 to 7.54)          | 7.05<br>(6.65 to 7.55)          | 7.05<br>(6.72 to 7.55)          | 7.05<br>(6.80 to 7.59)          | 7.05<br>(6.87 to 7.60)          | 7.05<br>(6.93 to 7.62)          | 7.05<br>(7.00 to 7.63)          | 7.05<br>(7.07 to 7.63)         |                        |
| Burkina Faso                                                          | 10.94<br>(10.00 to 11.89)       | 10.94<br>(10.07 to 11.89)       | 10.94<br>(10.16 to 11.88)       | 11.01<br>(10.27 to 11.91)       | 11.15<br>(10.43 to 12.00)       | 11.25<br>(10.54 to 12.05)       | 11.35<br>(10.67 to 12.05)       | 11.38<br>(10.74 to 12.04)       | 11.38<br>(10.79 to 11.99)       | 11.38<br>(10.86 to 11.91)      |                        |
| Cameroon                                                              | 14.83<br>(13.64 to 15.67)       | 14.83<br>(13.82 to 15.93)       | 14.83<br>(14.00 to 15.93)       | 14.83<br>(14.18 to 15.35)       | 14.83<br>(14.35 to 16.51)       | 14.83<br>(14.41 to 16.58)       | 14.83<br>(14.45 to 16.62)       | 14.83<br>(14.53 to 16.68)       | 14.83<br>(14.63 to 16.88)       | 14.83<br>(14.80 to 16.82)      |                        |
| Cape Verde                                                            | 0.19<br>(0.18 to 0.21)          | 0.20<br>(0.18 to 0.22)          | 0.20<br>(0.19 to 0.22)          | 0.20<br>(0.18 to 0.22)          | 0.20<br>(0.18 to 0.22)          | 0.20<br>(0.18 to 0.22)          | 0.20<br>(0.17 to 0.22)          | 0.19<br>(0.16 to 0.22)          | 0.19<br>(0.16 to 0.21)          | 0.18<br>(0.16 to 0.21)         |                        |
| Chad                                                                  | 14.74<br>(14.30 to 15.25)       | 14.74<br>(14.59 to 15.56)       | 14.74<br>(14.                   |                                 |                                 |                                 |                                 |                                 |                                 |                                |                        |

Appendix Table 18C. Stillbirths (in thousands) by location, 1990-2005

|                                  | 1996                         | 1997                         | 1998                         | 1999                         | 2000                         | 2001                         | 2002                         | 2003                         | 2004                         | 2005                         |
|----------------------------------|------------------------------|------------------------------|------------------------------|------------------------------|------------------------------|------------------------------|------------------------------|------------------------------|------------------------------|------------------------------|
| Zambia                           | 12 96<br>(12 28 to 13 74)    | 12 93<br>(12 25 to 13 71)    | 13 00<br>(12 31 to 13 78)    | 13 09<br>(12 38 to 13 86)    | 13 11<br>(12 40 to 13 88)    | 12 93<br>(12 23 to 13 70)    | 12 65<br>(11 94 to 13 41)    | 12 40<br>(11 72 to 13 15)    | 12 16<br>(11 47 to 12 88)    | 11 96<br>(11 27 to 12 66)    |
| Central Sub-Saharan Africa       | 109 64<br>(106 24 to 113 19) | 110 86<br>(107 51 to 114 45) | 112 15<br>(108 79 to 115 67) | 113 24<br>(109 91 to 116 83) | 114 57<br>(111 20 to 118 16) | 115 41<br>(112 05 to 118 89) | 115 97<br>(112 64 to 119 56) | 116 35<br>(113 07 to 119 90) | 116 05<br>(112 79 to 119 57) | 115 84<br>(112 66 to 119 32) |
| Angola                           | 28 52<br>(27 14 to 29 94)    | 28 54<br>(27 19 to 29 99)    | 28 56<br>(27 23 to 30 00)    | 28 83<br>(27 46 to 30 27)    | 29 25<br>(27 87 to 30 66)    | 29 32<br>(27 94 to 30 74)    | 29 14<br>(27 81 to 30 55)    | 28 82<br>(27 52 to 30 18)    | 28 38<br>(27 11 to 29 71)    | 27 84<br>(26 60 to 29 17)    |
| Central African Republic         | 6 98<br>(6 54 to 7 47)       | 7 07<br>(6 61 to 7 56)       | 7 14<br>(6 66 to 7 64)       | 7 18<br>(6 70 to 7 70)       | 7 26<br>(6 77 to 7 78)       | 7 26<br>(6 77 to 7 78)       | 7 27<br>(6 79 to 7 80)       | 7 31<br>(6 84 to 7 83)       | 7 32<br>(6 85 to 7 85)       | 7 35<br>(6 86 to 7 88)       |
| Congo                            | 2 89<br>(2 71 to 3 09)       | 2 98<br>(2 79 to 3 19)       | 3 09<br>(2 89 to 3 30)       | 3 19<br>(2 98 to 3 42)       | 3 28<br>(3 06 to 3 51)       | 3 31<br>(3 10 to 3 54)       | 3 31<br>(3 09 to 3 54)       | 3 28<br>(3 08 to 3 51)       | 3 24<br>(3 03 to 3 47)       | 3 19<br>(2 98 to 3 41)       |
| Democratic Republic of the Congo | 69 43<br>(68 03 to 70 98)    | 70 54<br>(69 13 to 72 12)    | 71 70<br>(70 25 to 73 29)    | 72 40<br>(70 90 to 73 99)    | 73 17<br>(71 65 to 74 76)    | 73 94<br>(72 43 to 75 60)    | 74 70<br>(73 13 to 76 37)    | 75 38<br>(73 82 to 77 07)    | 75 56<br>(73 96 to 77 22)    | 75 91<br>(74 24 to 77 52)    |
| Equatorial Guinea                | 0 92<br>(0 86 to 0 98)       | 0 81<br>(0 76 to 0 87)       | 0 75<br>(0 70 to 0 80)       | 0 71<br>(0 66 to 0 76)       | 0 66<br>(0 62 to 0 71)       | 0 60<br>(0 56 to 0 65)       | 0 57<br>(0 53 to 0 61)       | 0 55<br>(0 52 to 0 59)       | 0 54<br>(0 50 to 0 58)       | 0 53<br>(0 50 to 0 57)       |
| Gabon                            | 0 90<br>(0 85 to 0 96)       | 0 91<br>(0 85 to 0 97)       | 0 91<br>(0 85 to 0 98)       | 0 93<br>(0 87 to 0 99)       | 0 95<br>(0 89 to 1 02)       | 0 95<br>(0 91 to 1 04)       | 0 98<br>(0 93 to 1 06)       | 0 99<br>(0 94 to 1 07)       | 1 00<br>(0 95 to 1 08)       | 1 01<br>(0 95 to 1 08)       |

Appendix Table 18D. Stillbirths (in thousands) by location, 2006-2016

|                                  | 2006                            | 2007                            | 2008                            | 2009                            | 2010                            | 2011                            | 2012                            | 2013                            | 2014                            | 2015                            | 2016                            |
|----------------------------------|---------------------------------|---------------------------------|---------------------------------|---------------------------------|---------------------------------|---------------------------------|---------------------------------|---------------------------------|---------------------------------|---------------------------------|---------------------------------|
| <b>Global</b>                    | 2474.04<br>(2361.08 to 2589.93) | 2417.18<br>(2307.03 to 2529.43) | 2360.55<br>(2256.19 to 2464.91) | 2300.44<br>(2199.07 to 2401.81) | 2252.57<br>(2149.99 to 2355.15) | 2154.78<br>(2059.99 to 2249.58) | 2072.54<br>(1983.48 to 2161.42) | 1986.90<br>(1902.93 to 2070.87) | 1894.81<br>(1815.66 to 1973.96) | 1798.64<br>(1716.66 to 1880.62) | 1726.20<br>(1644.44 to 1807.96) |
| <b>High SDI</b>                  | 41.50<br>(40.53 to 42.46)       | 41.95<br>(40.97 to 42.94)       | 41.50<br>(40.51 to 42.50)       | 41.42<br>(40.42 to 42.42)       | 40.58<br>(39.54 to 41.62)       | 39.55<br>(38.47 to 40.63)       | 39.12<br>(37.98 to 40.27)       | 39.19<br>(37.98 to 40.40)       | 38.53<br>(36.16 to 39.53)       | 37.78<br>(35.62 to 39.25)       | 36.67<br>(34.87 to 38.83)       |
| <b>High-middle SDI</b>           | 204.52<br>(207.66 to 227.14)    | 204.52<br>(201.49 to 229.00)    | 204.52<br>(195.98 to 213.13)    | 204.52<br>(190.15 to 217.13)    | 204.52<br>(183.80 to 220.17)    | 204.52<br>(176.58 to 192.82)    | 204.52<br>(161.58 to 185.84)    | 204.52<br>(161.58 to 179.45)    | 204.52<br>(153.11 to 171.96)    | 204.52<br>(143.37 to 163.54)    | 204.52<br>(135.24 to 155.89)    |
| <b>Middle SDI</b>                | 451.87<br>(413.89 to 471.10)    | 435.70<br>(416.06 to 455.34)    | 420.13<br>(406.18 to 434.08)    | 403.15<br>(385.44 to 420.87)    | 385.40<br>(368.08 to 402.72)    | 366.50<br>(348.38 to 384.62)    | 348.67<br>(329.31 to 368.03)    | 330.22<br>(310.11 to 350.33)    | 311.76<br>(291.39 to 332.13)    | 292.96<br>(271.99 to 314.00)    | 276.84<br>(262.24 to 302.41)    |
| <b>Low-middle SDI</b>            | 1310.84<br>(1238.86 to 1386.92) | 1276.66<br>(1211.18 to 1352.07) | 1248.48<br>(1184.84 to 1312.12) | 1212.82<br>(1150.84 to 1281.32) | 1182.32<br>(1113.30 to 1259.46) | 1152.78<br>(1088.65 to 1191.01) | 1127.83<br>(1069.49 to 1182.22) | 1107.27<br>(1050.29 to 1164.25) | 1091.28<br>(1035.81 to 1146.75) | 1074.57<br>(1020.99 to 1128.15) | 1058.87<br>(1007.61 to 1110.13) |
| <b>Low SDI</b>                   | 445.74<br>(434.12 to 469.43)    | 446.70<br>(432.49 to 466.95)    | 446.70<br>(430.37 to 464.16)    | 446.70<br>(428.02 to 461.04)    | 446.70<br>(425.19 to 457.74)    | 446.70<br>(420.42 to 452.83)    | 446.70<br>(416.10 to 447.30)    | 446.70<br>(413.33 to 441.82)    | 446.70<br>(405.53 to 455.02)    | 446.70<br>(401.50 to 429.97)    | 446.70<br>(395.44 to 424.26)    |
| <b>High-income</b>               | 36.93<br>(35.90 to 38.01)       | 37.19<br>(36.28 to 38.19)       | 37.19<br>(35.75 to 37.79)       | 37.19<br>(34.84 to 39.54)       | 37.19<br>(33.44 to 38.89)       | 37.19<br>(32.86 to 35.67)       | 37.19<br>(31.89 to 35.37)       | 37.19<br>(30.87 to 35.04)       | 37.19<br>(30.16 to 34.91)       | 37.19<br>(29.77 to 35.12)       | 37.19<br>(29.33 to 35.16)       |
| <b>High-income North America</b> | 12.52<br>(12.71 to 13.88)       | 12.52<br>(12.93 to 14.14)       | 12.52<br>(12.08 to 13.85)       | 12.52<br>(11.88 to 13.04)       | 12.52<br>(11.43 to 12.56)       | 12.52<br>(10.99 to 12.09)       | 12.52<br>(10.72 to 11.97)       | 12.52<br>(10.55 to 11.95)       | 12.52<br>(10.39 to 12.36)       | 12.52<br>(10.19 to 12.57)       | 12.52<br>(10.30 to 11.41)       |
| <b>Canada</b>                    | 0.00<br>(0.00 to 0.01)          | 0.00<br>(0.00 to 0.01)          | 0.00<br>(0.00 to 0.01)          | 0.00<br>(0.00 to 0.01)          | 0.00<br>(0.00 to 0.01)          | 0.00<br>(0.00 to 0.01)          | 0.00<br>(0.00 to 0.01)          | 0.00<br>(0.00 to 0.01)          | 0.00<br>(0.00 to 0.01)          | 0.00<br>(0.00 to 0.01)          | 0.00<br>(0.00 to 0.01)          |
| <b>United States</b>             | 12.52<br>(11.93 to 13.09)       | 12.52<br>(12.13 to 13.14)       | 12.52<br>(11.88 to 13.04)       | 12.52<br>(11.43 to 12.56)       | 12.52<br>(10.99 to 12.09)       | 12.52<br>(10.72 to 11.97)       | 12.52<br>(10.55 to 11.95)       | 12.52<br>(10.39 to 12.36)       | 12.52<br>(10.19 to 12.57)       | 12.52<br>(10.30 to 11.41)       | 12.52<br>(10.30 to 11.41)       |
| <b>Australia</b>                 | 0.00<br>(0.00 to 0.01)          | 0.00<br>(0.00 to 0.01)          | 0.00<br>(0.00 to 0.01)          | 0.00<br>(0.00 to 0.01)          | 0.00<br>(0.00 to 0.01)          | 0.00<br>(0.00 to 0.01)          | 0.00<br>(0.00 to 0.01)          | 0.00<br>(0.00 to 0.01)          | 0.00<br>(0.00 to 0.01)          | 0.00<br>(0.00 to 0.01)          | 0.00<br>(0.00 to 0.01)          |
| <b>Greenland</b>                 | 0.00<br>(0.00 to 0.01)          | 0.00<br>(0.00 to 0.01)          | 0.00<br>(0.00 to 0.01)          | 0.00<br>(0.00 to 0.01)          | 0.00<br>(0.00 to 0.01)          | 0.00<br>(0.00 to 0.01)          | 0.00<br>(0.00 to 0.01)          | 0.00<br>(0.00 to 0.01)          | 0.00<br>(0.00 to 0.01)          | 0.00<br>(0.00 to 0.01)          | 0.00<br>(0.00 to 0.01)          |
| <b>New Zealand</b>               | 0.00<br>(0.00 to 0.01)          | 0.00<br>(0.00 to 0.01)          | 0.00<br>(0.00 to 0.01)          | 0.00<br>(0.00 to 0.01)          | 0.00<br>(0.00 to 0.01)          | 0.00<br>(0.00 to 0.01)          | 0.00<br>(0.00 to 0.01)          | 0.00<br>(0.00 to 0.01)          | 0.00<br>(0.00 to 0.01)          | 0.00<br>(0.00 to 0.01)          | 0.00<br>(0.00 to 0.01)          |
| <b>High-income Asia Pacific</b>  | 3.71<br>(3.27 to 3.88)          | 3.64<br>(3.27 to 3.79)          | 3.49<br>(3.12 to 3.65)          | 3.32<br>(2.92 to 3.48)          | 3.27<br>(2.80 to 3.45)          | 3.22<br>(2.62 to 3.42)          | 3.20<br>(2.83 to 3.36)          | 3.20<br>(2.62 to 3.21)          | 3.20<br>(2.62 to 3.21)          | 3.20<br>(2.62 to 3.21)          | 3.20<br>(2.62 to 3.21)          |
| <b>Brunei</b>                    | 0.03<br>(0.03 to 0.03)          | 0.03<br>(0.03 to 0.03)          | 0.03<br>(0.03 to 0.03)          | 0.03<br>(0.03 to 0.03)          | 0.03<br>(0.03 to 0.03)          | 0.03<br>(0.03 to 0.03)          | 0.03<br>(0.03 to 0.03)          | 0.03<br>(0.03 to 0.03)          | 0.03<br>(0.03 to 0.03)          | 0.03<br>(0.03 to 0.03)          | 0.03<br>(0.03 to 0.03)          |
| <b>Japan</b>                     | 2.43<br>(2.29 to 2.58)          | 2.38<br>(2.25 to 2.53)          | 2.38<br>(2.21 to 2.48)          | 2.38<br>(2.21 to 2.37)          | 2.38<br>(2.08 to 2.31)          | 2.38<br>(1.86 to 2.28)          | 2.38<br>(1.85 to 2.22)          | 2.38<br>(1.74 to 2.07)          | 2.38<br>(1.43 to 2.07)          | 2.38<br>(1.15 to 2.01)          | 2.38<br>(0.97 to 2.01)          |
| <b>Singapore</b>                 | 0.09<br>(0.09 to 0.09)          | 0.09<br>(0.09 to 0.09)          | 0.09<br>(0.09 to 0.09)          | 0.09<br>(0.09 to 0.09)          | 0.09<br>(0.09 to 0.09)          | 0.09<br>(0.09 to 0.09)          | 0.09<br>(0.09 to 0.09)          | 0.09<br>(0.09 to 0.09)          | 0.09<br>(0.09 to 0.09)          | 0.09<br>(0.09 to 0.09)          | 0.09<br>(0.09 to 0.09)          |
| <b>South Korea</b>               | 1.16<br>(1.11 to 1.23)          | 1.14<br>(1.08 to 1.20)          | 1.04<br>(0.99 to 1.09)          | 1.04<br>(0.94 to 1.03)          | 1.04<br>(0.95 to 1.05)          | 1.04<br>(0.95 to 1.05)          | 1.04<br>(0.90 to 1.09)          | 1.04<br>(0.82 to 1.09)          | 1.04<br>(0.77 to 0.87)          | 1.04<br>(0.75 to 0.84)          | 1.04<br>(0.73 to 0.82)          |
| <b>Western Europe</b>            | 11.44<br>(11.44 to 11.97)       | 11.44<br>(11.44 to 11.95)       | 11.44<br>(11.44 to 11.95)       | 11.44<br>(11.44 to 11.95)       | 11.44<br>(11.44 to 11.95)       | 11.44<br>(11.44 to 11.95)       | 11.44<br>(11.44 to 11.95)       | 11.44<br>(11.44 to 11.95)       | 11.44<br>(11.44 to 11.95)       | 11.44<br>(11.44 to 11.95)       | 11.44<br>(11.44 to 11.95)       |
| <b>Andorra</b>                   | 0.00<br>(0.00 to 0.00)          | 0.00<br>(0.00 to 0.00)          | 0.00<br>(0.00 to 0.00)          | 0.00<br>(0.00 to 0.00)          | 0.00<br>(0.00 to 0.00)          | 0.00<br>(0.00 to 0.00)          | 0.00<br>(0.00 to 0.00)          | 0.00<br>(0.00 to 0.00)          | 0.00<br>(0.00 to 0.00)          | 0.00<br>(0.00 to 0.00)          | 0.00<br>(0.00 to 0.00)          |
| <b>Austria</b>                   | 0.13<br>(0.13 to 0.13)          | 0.13<br>(0.13 to 0.13)          | 0.13<br>(0.13 to 0.13)          | 0.13<br>(0.14 to 0.15)          | 0.13<br>(0.14 to 0.15)          | 0.13<br>(0.14 to 0.15)          | 0.13<br>(0.14 to 0.15)          | 0.13<br>(0.14 to 0.15)          | 0.13<br>(0.14 to 0.16)          | 0.13<br>(0.14 to 0.16)          | 0.13<br>(0.14 to 0.16)          |
| <b>Belgium</b>                   | 0.27<br>(0.24 to 0.30)          | 0.27<br>(0.24 to 0.29)          | 0.27<br>(0.24 to 0.29)          | 0.27<br>(0.24 to 0.29)          | 0.27<br>(0.24 to 0.29)          | 0.27<br>(0.24 to 0.29)          | 0.27<br>(0.24 to 0.29)          | 0.27<br>(0.24 to 0.29)          | 0.27<br>(0.24 to 0.30)          | 0.27<br>(0.24 to 0.30)          | 0.27<br>(0.24 to 0.30)          |
| <b>Cyprus</b>                    | 0.03<br>(0.03 to 0.03)          | 0.03<br>(0.03 to 0.03)          | 0.03<br>(0.03 to 0.03)          | 0.03<br>(0.03 to 0.03)          | 0.03<br>(0.03 to 0.03)          | 0.03<br>(0.03 to 0.03)          | 0.03<br>(0.03 to 0.03)          | 0.03<br>(0.03 to 0.03)          | 0.03<br>(0.03 to 0.03)          | 0.03<br>(0.03 to 0.03)          | 0.03<br>(0.03 to 0.03)          |
| <b>Denmark</b>                   | 0.10<br>(0.10 to 0.11)          | 0.10<br>(0.09 to 0.11)          | 0.10<br>(0.09 to 0.11)          | 0.10<br>(0.08 to 0.11)          | 0.10<br>(0.07 to 0.09)          | 0.10<br>(0.06 to 0.09)          | 0.10<br>(0.06 to 0.09)          | 0.10<br>(0.06 to 0.09)          | 0.10<br>(0.06 to 0.09)          | 0.10<br>(0.06 to 0.09)          | 0.10<br>(0.06 to 0.09)          |
| <b>Finland</b>                   | 0.09<br>(0.08 to 0.09)          | 0.09<br>(0.08 to 0.09)          | 0.09<br>(0.08 to 0.09)          | 0.09<br>(0.08 to 0.09)          | 0.09<br>(0.08 to 0.09)          | 0.09<br>(0.08 to 0.09)          | 0.09<br>(0.08 to 0.09)          | 0.09<br>(0.08 to 0.09)          | 0.09<br>(0.08 to 0.09)          | 0.09<br>(0.08 to 0.09)          | 0.09<br>(0.08 to 0.09)          |
| <b>France</b>                    | 2.97<br>(2.96 to 3.04)          | 2.90<br>(2.83 to 2.97)          | 2.90<br>(2.85 to 2.92)          | 2.90<br>(2.83 to 2.97)          | 2.90<br>(2.83 to 2.96)          | 2.90<br>(2.80 to 2.89)          | 2.90<br>(2.68 to 2.89)          | 2.90<br>(2.68 to 2.83)          | 2.90<br>(2.63 to 2.77)          | 2.90<br>(2.61 to 2.75)          | 2.90<br>(2.59 to 2.73)          |
| <b>Germany</b>                   | 1.17<br>(1.16 to 1.18)          | 1.21<br>(1.19 to 1.21)          | 1.21<br>(1.12 to 1.14)          | 1.21<br>(1.09 to 1.11)          | 1.21<br>(1.08 to 1.11)          | 1.21<br>(1.08 to 1.12)          | 1.21<br>(1.05 to 1.17)          | 1.21<br>(1.08 to 1.10)          | 1.21<br>(1.09 to 1.11)          | 1.21<br>(1.06 to 1.08)          | 1.21<br>(1.03 to 1.05)          |
| <b>Greece</b>                    | 0.23<br>(0.23 to 0.23)          | 0.23<br>(0.23 to 0.23)          | 0.23<br>(0.23 to 0.23)          | 0.23<br>(0.22 to 0.23)          | 0.23<br>(0.22 to 0.23)          | 0.23<br>(0.22 to 0.23)          | 0.23<br>(0.22 to 0.23)          | 0.23<br>(0.22 to 0.23)          | 0.23<br>(0.22 to 0.23)          | 0.23<br>(0.22 to 0.23)          | 0.23<br>(0.22 to 0.23)          |
| <b>Iceland</b>                   | 0.01<br>(0.01 to 0.01)          | 0.01<br>(0.01 to 0.01)          | 0.01<br>(0.01 to 0.01)          | 0.01<br>(0.01 to 0.01)          | 0.01<br>(0.01 to 0.01)          | 0.01<br>(0.01 to 0.01)          | 0.01<br>(0.01 to 0.01)          | 0.01<br>(0.01 to 0.01)          | 0.01<br>(0.01 to 0.01)          | 0.01<br>(0.01 to 0.01)          | 0.01<br>(0.01 to 0.01)          |
| <b>Ireland</b>                   | 0.17<br>(0.16 to 0.18)          | 0.18<br>(0.17 to 0.19)          | 0.18<br>(0.17 to 0.19)          | 0.18<br>(0.17 to 0.19)          | 0.18<br>(0.16 to 0.18)          | 0.18<br>(0.15 to 0.17)          | 0.18<br>(0.14 to 0.16)          | 0.18<br>(0.14 to 0.16)          | 0.18<br>(0.14 to 0.16)          | 0.18<br>(0.13 to 0.15)          | 0.18<br>(0.13 to 0.14)          |
| <b>Israel</b>                    | 0.39<br>(0.35 to 0.41)          | 0.40<br>(0.36 to 0.42)          | 0.40<br>(0.37 to 0.43)          | 0.40<br>(0.38 to 0.42)          | 0.40<br>(0.39 to 0.46)          | 0.40<br>(0.39 to 0.48)          | 0.40<br>(0.39 to 0.48)          | 0.40<br>(0.37 to 0.47)          | 0.40<br>(0.38 to 0.49)          | 0.40<br>(0.37 to 0.48)          | 0.40<br>(0.36 to 0.47)          |
| <b>Italy</b>                     | 1.05<br>(0.91 to 1.09)          | 1.02<br>(0.92 to 1.07)          | 1.00<br>(0.91 to 1.08)          | 1.00<br>(0.91 to 1.07)          | 1.00<br>(0.86 to 1.01)          | 1.00<br>(0.82 to 1.01)          | 1.00<br>(0.80 to 0.95)          | 1.00<br>(0.71 to 0.88)          | 1.00<br>(0.70 to 0.84)          | 1.00<br>(0.68 to 0.80)          | 1.00<br>(0.65 to 0.80)          |
| <b>Luxembourg</b>                | 0.01<br>(0.01 to 0.01)          | 0.01<br>(0.01 to 0.01)          | 0.01<br>(0.01 to 0.01)          | 0.01<br>(0.01 to 0.01)          | 0.01<br>(0.01 to 0.01)          | 0.01<br>(0.01 to 0.01)          | 0.01<br>(0.01 to 0.01)          | 0.01<br>(0.01 to 0.01)          | 0.01<br>(0.01 to 0.01)          | 0.01<br>(0.01 to 0.01)          | 0.01<br>(0.01 to 0.01)          |
| <b>Malta</b>                     | 0.01<br>(0.01 to 0.01)          | 0.01<br>(0.01 to 0.01)          | 0.01<br>(0.01 to 0.01)          | 0.01<br>(0.01 to 0.01)          | 0.01<br>(0.01 to 0.01)          | 0.01<br>(0.01 to 0.01)          | 0.01<br>(0.01 to 0.01)          | 0.01<br>(0.01 to 0.01)          | 0.01<br>(0.01 to 0.01)          | 0.01<br>(0.01 to 0.01)          | 0.01<br>(0.01 to 0.01)          |
| <b>Netherlands</b>               | 0.42<br>(0.37 to 0.46)          | 0.42<br>(0.35 to 0.43)          | 0.42<br>(0.34 to 0.41)          | 0.42<br>(0.33 to 0.40)          | 0.42<br>(0.32 to 0.39)          | 0.42<br>(0.30 to 0.38)          | 0.42<br>(0.29 to 0.38)          | 0.42<br>(0.29 to 0.39)          | 0.42<br>(0.24 to 0.39)          | 0.42<br>(0.24 to 0.39)          | 0.42<br>(0.24 to 0.39)          |
| <b>Norway</b>                    | 0.11<br>(0.10 to 0.11)          | 0.11<br>(0.10 to 0.11)          | 0.11<br>(0.10 to 0.11)          | 0.11<br>(0.10 to 0.11)          | 0.11<br>(0.10 to 0.11)          | 0.11<br>(0.10 to 0.11)          | 0.11<br>(0.10 to 0.11)          | 0.11<br>(0.10 to 0.11)          | 0.11<br>(0.10 to 0.11)          | 0.11<br>(0.10 to 0.11)          | 0.11<br>(0.10 to 0.11)          |
| <b>Portugal</b>                  | 0.22<br>(0.21 to 0.22)          | 0.22<br>(0.20 to 0.21)          | 0.22<br>(0.20 to 0.21)          | 0.22<br>(0.19 to 0.20)          | 0.22<br>(0.18 to 0.18)          | 0.22<br>(0.17 to 0.18)          | 0.22<br>(0.16 to 0.16)          | 0.22<br>(0.14 to 0.15)          | 0.22<br>(0.13 to 0.14)          | 0.22<br>(0.13 to 0.14)          | 0.22<br>(0.13 to 0.14)          |
| <b>Spain</b>                     | 0.71<br>(0.68 to 0.75)          | 0.69<br>(0.60 to 0.78)          | 0.69<br>(0.59 to 0.77)          | 0.69<br>(0.65 to 0.72)          | 0.69<br>(0.64 to 0.72)          | 0.69<br>(0.61 to 0.69)          | 0.69<br>(0.58 to 0.66)          | 0.69<br>(0.52 to 0.60)          | 0.69<br>(0.48 to 0.61)          | 0.69<br>(0.51 to 0.59)          | 0.69<br>(0.51 to 0.59)          |
| <b>Sweden</b>                    | 0.20<br>(0.19 to 0.20)          | 0.20<br>(0.19 to 0.21)          | 0.20<br>(0.20 to 0.21)          | 0.20<br>(0.20 to 0.21)          | 0.20<br>(0.20 to 0.21)          | 0.20<br>(0.20 to 0.21)          | 0.20<br>(0.20 to 0.21)          | 0.20<br>(0.20 to 0.21)          | 0.20<br>(0.20 to 0.21)          | 0.20<br>(0.20 to 0.21)          | 0.20<br>(0.20 to 0.21)          |
| <b>Switzerland</b>               | 0.14<br>(0.13 to 0.15)          | 0.14<br>(0.13 to 0.15)          | 0.14<br>(0.13 to 0.15)          | 0.14<br>(0.14 to 0.16)          | 0.14<br>(0.14 to 0.15)          | 0.14<br>(0.14 to 0.16)          | 0.14<br>(0.14 to 0.16)          | 0.14<br>(0.14 to 0.17)          | 0.14<br>(0.14 to 0.17)          | 0.14<br>(0.14 to 0.17)          | 0.14<br>(0.14 to 0.16)          |
| <b>United Kingdom</b>            | 3.31<br>(3.23 to 3.39)          | 3.36<br>(3.28 to 3.45)          | 3.36<br>(3.28 to 3.45)          | 3.36<br>(3.24 to 3.48)          | 3.36<br>(3.24 to 3.43)          | 3.36<br>(3.16 to 3.29)          | 3.36<br>(2.94 to 3.05)          | 3.36<br>(2.74 to 2.88)          | 3.36<br>(2.70 to 2.84)          | 3.36<br>(2.71 to 2.85)          | 3.36<br>(2.71 to 2.85)          |
| <b>England</b>                   | 2.56<br>(2.50 to 2.62)          | 2.49<br>(2.40 to 2.65)          | 2.49<br>(2.41 to 2.67)          | 2.49<br>(2.41 to 2.64)          | 2.49<br>(2.41 to 2.54)          | 2.49<br>(2.41 to 2.56)          | 2.49<br>(2.41 to 2.56)          | 2.49<br>(2.41 to 2.56)          | 2.49<br>(2.41 to 2.56)          | 2.49<br>(2.41 to 2.56)          | 2.49<br>(2.41 to 2.56)          |
| <b>Northern Ireland</b>          | 0.15<br>(0.15 to 0.16)          | 0.16<br>(0.15 to 0.16)          | 0.16<br>(0.15 to 0.16)          | 0.16<br>(0.15 to 0.16)          | 0.16<br>(0.16 to 0.17)          | 0.16<br>(0.15 to 0.15)          | 0.16<br>(0.15 to 0.14)          |                                 |                                 |                                 |                                 |

|                                               | 2006                         | 2007                         | 2008                         | 2009                         | 2010                         | 2011                         | 2012                         | 2013                         | 2014                         | 2015                         | 2016                         |
|-----------------------------------------------|------------------------------|------------------------------|------------------------------|------------------------------|------------------------------|------------------------------|------------------------------|------------------------------|------------------------------|------------------------------|------------------------------|
| Uzbekistan                                    | 5 71<br>(5 494 to 5 92)      | 5 73<br>(5 514 to 5 95)      | 5 73<br>(5 514 to 5 94)      | 5 71<br>(5 541 to 5 89)      | 5 60<br>(5 441 to 5 88)      | 5 57<br>(5 415 to 5 79)      | 5 48<br>(5 275 to 5 69)      | 5 36<br>(5 165 to 5 56)      | 5 24<br>(5 075 to 5 40)      | 5 08<br>(4 895 to 5 29)      | 4 90<br>(4 721 to 5 11)      |
| <b>Latin America and Caribbean</b>            | 87.82<br>(82.62 to 93.71)    | 87.82<br>(82.62 to 93.71)    | 87.82<br>(82.62 to 93.71)    | 87.82<br>(82.62 to 93.71)    | 87.82<br>(82.62 to 93.71)    | 87.82<br>(82.62 to 93.71)    | 87.82<br>(82.62 to 93.71)    | 87.82<br>(82.62 to 93.71)    | 87.82<br>(82.62 to 93.71)    | 87.82<br>(82.62 to 93.71)    | 87.82<br>(82.62 to 93.71)    |
| <b>Central Latin America</b>                  | 33.10<br>(32.29 to 37.04)    | 33.10<br>(32.29 to 37.04)    | 33.10<br>(32.29 to 37.04)    | 33.10<br>(32.29 to 37.04)    | 33.10<br>(32.29 to 37.04)    | 33.10<br>(32.29 to 37.04)    | 33.10<br>(32.29 to 37.04)    | 33.10<br>(32.29 to 37.04)    | 33.10<br>(32.29 to 37.04)    | 33.10<br>(32.29 to 37.04)    | 33.10<br>(32.29 to 37.04)    |
| Colombia                                      | 9.41<br>(8.52 to 10.30)      | 9.21<br>(8.32 to 10.10)      | 8.94<br>(8.05 to 9.83)       | 8.67<br>(7.78 to 9.56)       | 8.33<br>(7.44 to 9.21)       | 7.91<br>(7.02 to 8.79)       | 7.49<br>(6.71 to 8.33)       | 7.04<br>(6.34 to 7.83)       | 6.60<br>(6.00 to 7.41)       | 6.15<br>(5.59 to 6.71)       | 5.80<br>(5.25 to 6.35)       |
| Costa Rica                                    | 0.49<br>(0.47 to 0.50)       | 0.48<br>(0.46 to 0.50)       | 0.47<br>(0.45 to 0.49)       | 0.46<br>(0.44 to 0.48)       | 0.45<br>(0.43 to 0.47)       | 0.44<br>(0.42 to 0.46)       | 0.43<br>(0.41 to 0.45)       | 0.42<br>(0.40 to 0.44)       | 0.41<br>(0.39 to 0.43)       | 0.40<br>(0.38 to 0.42)       | 0.39<br>(0.37 to 0.41)       |
| El Salvador                                   | 0.88<br>(0.86 to 0.91)       | 0.88<br>(0.86 to 0.91)       | 0.88<br>(0.86 to 0.91)       | 0.88<br>(0.86 to 0.91)       | 0.88<br>(0.86 to 0.91)       | 0.88<br>(0.86 to 0.91)       | 0.88<br>(0.86 to 0.91)       | 0.88<br>(0.86 to 0.91)       | 0.88<br>(0.86 to 0.91)       | 0.88<br>(0.86 to 0.91)       | 0.88<br>(0.86 to 0.91)       |
| Guatemala                                     | 3.85<br>(3.56 to 4.15)       | 3.85<br>(3.56 to 4.15)       | 3.85<br>(3.56 to 4.15)       | 3.85<br>(3.56 to 4.15)       | 3.85<br>(3.56 to 4.15)       | 3.85<br>(3.56 to 4.15)       | 3.85<br>(3.56 to 4.15)       | 3.85<br>(3.56 to 4.15)       | 3.85<br>(3.56 to 4.15)       | 3.85<br>(3.56 to 4.15)       | 3.85<br>(3.56 to 4.15)       |
| Honduras                                      | 1.00<br>(1.01 to 1.01)       | 0.99<br>(1.01 to 1.01)       | 0.99<br>(1.01 to 1.01)       | 0.99<br>(1.01 to 1.01)       | 0.99<br>(1.01 to 1.01)       | 0.99<br>(1.01 to 1.01)       | 0.99<br>(1.01 to 1.01)       | 0.99<br>(1.01 to 1.01)       | 0.99<br>(1.01 to 1.01)       | 0.99<br>(1.01 to 1.01)       | 0.99<br>(1.01 to 1.01)       |
| Mexico                                        | 13.35<br>(12.86 to 13.87)    | 12.90<br>(12.40 to 13.40)    | 12.49<br>(12.00 to 13.00)    | 12.17<br>(11.68 to 12.67)    | 11.90<br>(11.41 to 12.39)    | 11.40<br>(10.91 to 11.89)    | 10.96<br>(10.47 to 11.45)    | 10.55<br>(10.06 to 11.03)    | 10.11<br>(9.62 to 10.61)     | 9.68<br>(9.19 to 10.16)      | 9.35<br>(8.86 to 9.82)       |
| Nicaragua                                     | 1.09<br>(1.08 to 1.11)       | 1.06<br>(1.05 to 1.06)       | 1.05<br>(1.04 to 1.06)       | 1.04<br>(1.03 to 1.05)       | 1.03<br>(1.02 to 1.04)       | 1.02<br>(1.01 to 1.03)       | 1.01<br>(1.00 to 1.02)       | 1.01<br>(1.00 to 1.02)       | 1.00<br>(0.99 to 1.01)       | 0.99<br>(0.98 to 1.00)       | 0.98<br>(0.97 to 0.99)       |
| Panama                                        | 0.43<br>(0.42 to 0.44)       | 0.43<br>(0.42 to 0.44)       | 0.43<br>(0.42 to 0.44)       | 0.43<br>(0.42 to 0.44)       | 0.43<br>(0.42 to 0.44)       | 0.43<br>(0.42 to 0.44)       | 0.43<br>(0.42 to 0.44)       | 0.43<br>(0.42 to 0.44)       | 0.43<br>(0.42 to 0.44)       | 0.43<br>(0.42 to 0.44)       | 0.43<br>(0.42 to 0.44)       |
| Venezuela                                     | 3.71<br>(3.11 to 3.92)       | 3.60<br>(3.01 to 3.82)       | 3.53<br>(2.93 to 3.74)       | 3.51<br>(2.91 to 3.72)       | 3.54<br>(2.94 to 3.75)       | 3.54<br>(2.94 to 3.75)       | 3.50<br>(2.90 to 3.71)       | 3.41<br>(2.81 to 3.62)       | 3.11<br>(2.51 to 3.42)       | 2.82<br>(2.22 to 3.13)       | 2.58<br>(1.98 to 2.89)       |
| <b>Andean Latin America</b>                   | 12.35<br>(11.39 to 13.66)    | 11.63<br>(10.57 to 12.82)    | 10.92<br>(9.96 to 12.09)     | 10.46<br>(9.50 to 11.46)     | 10.22<br>(9.26 to 11.22)     | 10.01<br>(9.05 to 11.01)     | 9.82<br>(8.86 to 10.81)      | 9.70<br>(8.74 to 10.74)      | 9.60<br>(8.64 to 10.64)      | 9.50<br>(8.54 to 10.54)      | 9.40<br>(8.44 to 10.44)      |
| Bolivia                                       | 1.09<br>(1.28 to 4.75)       | 1.09<br>(1.30 to 4.41)       | 1.09<br>(1.31 to 4.08)       | 1.09<br>(1.32 to 3.75)       | 1.09<br>(1.33 to 3.42)       | 1.09<br>(1.34 to 3.10)       | 1.09<br>(1.35 to 2.78)       | 1.09<br>(1.36 to 2.46)       | 1.09<br>(1.37 to 2.14)       | 1.09<br>(1.38 to 1.82)       | 1.09<br>(1.39 to 1.39)       |
| Ecuador                                       | 2.86<br>(2.60 to 3.14)       | 2.72<br>(2.46 to 2.95)       | 2.57<br>(2.30 to 2.81)       | 2.43<br>(2.16 to 2.71)       | 2.34<br>(2.07 to 2.61)       | 2.26<br>(1.99 to 2.53)       | 2.19<br>(1.92 to 2.29)       | 2.14<br>(1.87 to 2.25)       | 2.08<br>(1.81 to 2.17)       | 2.01<br>(1.74 to 2.14)       | 1.96<br>(1.69 to 2.14)       |
| Peru                                          | 5.51<br>(5.01 to 6.01)       | 5.22<br>(4.74 to 5.70)       | 4.94<br>(4.50 to 5.39)       | 4.74<br>(4.30 to 5.18)       | 4.58<br>(4.14 to 5.02)       | 4.45<br>(4.01 to 4.93)       | 4.36<br>(3.92 to 4.81)       | 4.27<br>(3.83 to 4.81)       | 4.18<br>(3.74 to 4.81)       | 4.10<br>(3.66 to 4.81)       | 4.02<br>(3.58 to 4.81)       |
| <b>Caribbean</b>                              | 17.24<br>(15.01 to 20.01)    | 16.86<br>(14.88 to 19.00)    | 16.66<br>(14.81 to 19.35)    | 16.66<br>(14.81 to 19.35)    | 16.66<br>(14.81 to 19.35)    | 16.66<br>(14.81 to 19.35)    | 16.66<br>(14.81 to 19.35)    | 16.66<br>(14.81 to 19.35)    | 16.66<br>(14.81 to 19.35)    | 16.66<br>(14.81 to 19.35)    | 16.66<br>(14.81 to 19.35)    |
| Antigua and Barbuda                           | 0.01<br>(0.01 to 0.02)       | 0.01<br>(0.01 to 0.02)       | 0.01<br>(0.01 to 0.02)       | 0.01<br>(0.01 to 0.02)       | 0.01<br>(0.01 to 0.02)       | 0.01<br>(0.01 to 0.02)       | 0.01<br>(0.01 to 0.02)       | 0.01<br>(0.01 to 0.02)       | 0.01<br>(0.01 to 0.02)       | 0.01<br>(0.01 to 0.02)       | 0.01<br>(0.01 to 0.02)       |
| The Bahamas                                   | 0.03<br>(0.03 to 0.04)       | 0.03<br>(0.03 to 0.04)       | 0.03<br>(0.03 to 0.04)       | 0.03<br>(0.03 to 0.04)       | 0.03<br>(0.03 to 0.04)       | 0.03<br>(0.03 to 0.04)       | 0.03<br>(0.03 to 0.04)       | 0.03<br>(0.03 to 0.04)       | 0.03<br>(0.03 to 0.04)       | 0.03<br>(0.03 to 0.04)       | 0.03<br>(0.03 to 0.04)       |
| Barbados                                      | 0.03<br>(0.03 to 0.04)       | 0.03<br>(0.03 to 0.04)       | 0.03<br>(0.03 to 0.04)       | 0.03<br>(0.03 to 0.04)       | 0.03<br>(0.03 to 0.04)       | 0.03<br>(0.03 to 0.04)       | 0.03<br>(0.03 to 0.04)       | 0.03<br>(0.03 to 0.04)       | 0.03<br>(0.03 to 0.04)       | 0.03<br>(0.03 to 0.04)       | 0.03<br>(0.03 to 0.04)       |
| Belize                                        | 0.11<br>(0.08 to 0.13)       | 0.10<br>(0.08 to 0.11)       | 0.10<br>(0.08 to 0.11)       | 0.10<br>(0.08 to 0.11)       | 0.10<br>(0.08 to 0.11)       | 0.10<br>(0.08 to 0.11)       | 0.10<br>(0.08 to 0.11)       | 0.10<br>(0.08 to 0.11)       | 0.10<br>(0.08 to 0.11)       | 0.10<br>(0.08 to 0.11)       | 0.10<br>(0.08 to 0.11)       |
| Bermuda                                       | 0.01<br>(0.01 to 0.01)       | 0.01<br>(0.01 to 0.01)       | 0.01<br>(0.01 to 0.01)       | 0.01<br>(0.01 to 0.01)       | 0.01<br>(0.01 to 0.01)       | 0.01<br>(0.01 to 0.01)       | 0.01<br>(0.01 to 0.01)       | 0.01<br>(0.01 to 0.01)       | 0.01<br>(0.01 to 0.01)       | 0.01<br>(0.01 to 0.01)       | 0.01<br>(0.01 to 0.01)       |
| Cuba                                          | 1.36<br>(1.22 to 1.41)       | 1.40<br>(1.26 to 1.41)       | 1.41<br>(1.26 to 1.41)       | 1.35<br>(1.21 to 1.41)       | 1.29<br>(1.15 to 1.33)       | 1.26<br>(1.12 to 1.31)       | 1.26<br>(1.12 to 1.31)       | 1.26<br>(1.12 to 1.31)       | 1.26<br>(1.12 to 1.31)       | 1.26<br>(1.12 to 1.31)       | 1.26<br>(1.12 to 1.31)       |
| Dominica                                      | 0.02<br>(0.01 to 0.02)       | 0.01<br>(0.01 to 0.02)       | 0.01<br>(0.01 to 0.02)       | 0.01<br>(0.01 to 0.02)       | 0.01<br>(0.01 to 0.02)       | 0.01<br>(0.01 to 0.02)       | 0.01<br>(0.01 to 0.02)       | 0.01<br>(0.01 to 0.02)       | 0.01<br>(0.01 to 0.02)       | 0.01<br>(0.01 to 0.02)       | 0.01<br>(0.01 to 0.02)       |
| Dominican Republic                            | 2.97<br>(2.75 to 3.40)       | 2.87<br>(2.68 to 3.21)       | 2.88<br>(2.60 to 3.21)       | 2.81<br>(2.54 to 3.13)       | 2.78<br>(2.50 to 3.09)       | 2.76<br>(2.46 to 3.05)       | 2.76<br>(2.46 to 2.97)       | 2.76<br>(2.46 to 2.88)       | 2.76<br>(2.46 to 2.88)       | 2.76<br>(2.46 to 2.88)       | 2.76<br>(2.46 to 2.88)       |
| Grenada                                       | 0.02<br>(0.01 to 0.02)       | 0.02<br>(0.01 to 0.02)       | 0.02<br>(0.01 to 0.02)       | 0.02<br>(0.01 to 0.02)       | 0.02<br>(0.01 to 0.02)       | 0.02<br>(0.01 to 0.02)       | 0.02<br>(0.01 to 0.02)       | 0.02<br>(0.01 to 0.02)       | 0.02<br>(0.01 to 0.02)       | 0.02<br>(0.01 to 0.02)       | 0.02<br>(0.01 to 0.02)       |
| Guyana                                        | 0.25<br>(0.23 to 0.27)       | 0.24<br>(0.22 to 0.26)       | 0.23<br>(0.21 to 0.24)       | 0.23<br>(0.20 to 0.23)       | 0.20<br>(0.19 to 0.22)       | 0.20<br>(0.18 to 0.21)       | 0.19<br>(0.17 to 0.21)       | 0.19<br>(0.17 to 0.19)       | 0.18<br>(0.17 to 0.19)       | 0.17<br>(0.15 to 0.18)       | 0.17<br>(0.15 to 0.18)       |
| Haiti                                         | 10.12<br>(8.07 to 12.58)     | 9.65<br>(8.09 to 12.54)      | 9.65<br>(8.09 to 12.54)      | 9.65<br>(8.09 to 12.54)      | 9.65<br>(8.09 to 12.54)      | 9.65<br>(8.09 to 12.54)      | 9.65<br>(8.09 to 12.54)      | 9.65<br>(8.09 to 12.54)      | 9.65<br>(8.09 to 12.54)      | 9.65<br>(8.09 to 12.54)      | 9.65<br>(8.09 to 12.54)      |
| Jamaica                                       | 0.82<br>(0.80 to 0.85)       | 0.80<br>(0.78 to 0.83)       | 0.80<br>(0.78 to 0.83)       | 0.80<br>(0.78 to 0.83)       | 0.80<br>(0.78 to 0.83)       | 0.80<br>(0.78 to 0.83)       | 0.80<br>(0.78 to 0.83)       | 0.80<br>(0.78 to 0.83)       | 0.80<br>(0.78 to 0.83)       | 0.80<br>(0.78 to 0.83)       | 0.80<br>(0.78 to 0.83)       |
| Puerto Rico                                   | 0.32<br>(0.30 to 0.33)       | 0.31<br>(0.29 to 0.32)       | 0.30<br>(0.29 to 0.31)       | 0.29<br>(0.28 to 0.31)       | 0.28<br>(0.27 to 0.30)       | 0.28<br>(0.26 to 0.29)       | 0.27<br>(0.25 to 0.28)       | 0.26<br>(0.24 to 0.27)       | 0.25<br>(0.23 to 0.25)       | 0.24<br>(0.22 to 0.24)       | 0.23<br>(0.21 to 0.24)       |
| Saint Lucia                                   | 0.04<br>(0.03 to 0.04)       | 0.04<br>(0.03 to 0.04)       | 0.04<br>(0.03 to 0.04)       | 0.04<br>(0.03 to 0.04)       | 0.04<br>(0.03 to 0.04)       | 0.04<br>(0.03 to 0.04)       | 0.04<br>(0.03 to 0.04)       | 0.04<br>(0.03 to 0.04)       | 0.04<br>(0.03 to 0.04)       | 0.04<br>(0.03 to 0.04)       | 0.04<br>(0.03 to 0.04)       |
| Saint Vincent and the Grenadines              | 0.02<br>(0.02 to 0.02)       | 0.02<br>(0.02 to 0.02)       | 0.02<br>(0.02 to 0.02)       | 0.02<br>(0.02 to 0.02)       | 0.02<br>(0.02 to 0.02)       | 0.02<br>(0.02 to 0.02)       | 0.02<br>(0.02 to 0.02)       | 0.02<br>(0.02 to 0.02)       | 0.02<br>(0.02 to 0.02)       | 0.02<br>(0.02 to 0.02)       | 0.02<br>(0.02 to 0.02)       |
| Suriname                                      | 0.21<br>(0.19 to 0.23)       | 0.20<br>(0.18 to 0.22)       | 0.19<br>(0.17 to 0.21)       | 0.19<br>(0.16 to 0.20)       | 0.18<br>(0.15 to 0.19)       | 0.18<br>(0.15 to 0.18)       | 0.18<br>(0.15 to 0.18)       | 0.18<br>(0.15 to 0.17)       | 0.18<br>(0.14 to 0.17)       | 0.17<br>(0.13 to 0.17)       | 0.17<br>(0.13 to 0.17)       |
| Trinidad and Tobago                           | 0.26<br>(0.23 to 0.29)       | 0.25<br>(0.22 to 0.28)       | 0.24<br>(0.21 to 0.27)       | 0.23<br>(0.20 to 0.25)       | 0.22<br>(0.19 to 0.24)       | 0.21<br>(0.18 to 0.23)       | 0.20<br>(0.17 to 0.22)       | 0.19<br>(0.16 to 0.21)       | 0.18<br>(0.15 to 0.20)       | 0.17<br>(0.14 to 0.19)       | 0.17<br>(0.14 to 0.19)       |
| Virgin Islands, U.S.                          | 0.01<br>(0.01 to 0.01)       | 0.01<br>(0.01 to 0.01)       | 0.01<br>(0.01 to 0.01)       | 0.01<br>(0.01 to 0.01)       | 0.01<br>(0.01 to 0.01)       | 0.01<br>(0.01 to 0.01)       | 0.01<br>(0.01 to 0.01)       | 0.01<br>(0.01 to 0.01)       | 0.01<br>(0.01 to 0.01)       | 0.01<br>(0.01 to 0.01)       | 0.01<br>(0.01 to 0.01)       |
| <b>Tropical Latin America</b>                 | 21.15<br>(22.71 to 23.59)    | 21.15<br>(22.71 to 23.59)    | 21.15<br>(22.71 to 23.59)    | 21.15<br>(22.71 to 23.59)    | 21.15<br>(22.71 to 23.59)    | 21.15<br>(22.71 to 23.59)    | 21.15<br>(22.71 to 23.59)    | 21.15<br>(22.71 to 23.59)    | 21.15<br>(22.71 to 23.59)    | 21.15<br>(22.71 to 23.59)    | 21.15<br>(22.71 to 23.59)    |
| Brazil                                        | 21.99<br>(21.85 to 22.45)    | 20.94<br>(20.80 to 21.39)    | 20.32<br>(19.85 to 21.35)    | 19.94<br>(19.58 to 21.35)    | 19.27<br>(18.78 to 21.35)    | 19.26<br>(18.78 to 21.35)    | 18.86<br>(18.38 to 21.35)    | 18.35<br>(17.88 to 21.35)    | 17.62<br>(17.15 to 21.35)    | 16.78<br>(16.31 to 21.35)    | 16.10<br>(15.63 to 21.35)    |
| Paraguay                                      | 1.16<br>(0.98 to 1.35)       | 1.06<br>(0.88 to 1.23)       | 0.98<br>(0.82 to 1.15)       | 0.98<br>(0.77 to 1.11)       | 0.98<br>(0.72 to 1.06)       | 0.98<br>(0.69 to 1.11)       | 0.98<br>(0.63 to 0.99)       | 0.98<br>(0.60 to 0.96)       | 0.98<br>(0.57 to 0.92)       | 0.98<br>(0.54 to 0.87)       | 0.98<br>(0.52 to 0.85)       |
| <b>Southeast Asia, East Asia, and Oceania</b> | 270.94<br>(263.14 to 289.99) | 270.94<br>(263.14 to 289.99) | 270.94<br>(263.14 to 289.99) | 270.94<br>(263.14 to 289.99) | 270.94<br>(263.14 to 289.99) | 270.94<br>(263.14 to 289.99) | 270.94<br>(263.14 to 289.99) | 270.94<br>(263.14 to 289.99) | 270.94<br>(263.14 to 289.99) | 270.94<br>(263.14 to 289.99) | 270.94<br>(263.14 to 289.99) |
| <b>East Asia</b>                              | 136.26<br>(125.69 to 149.44) | 129.91<br>(114.70 to 132.62) | 124.16<br>(109.02 to 127.75) | 117.16<br>(102.84 to 130.09) | 109.48<br>(95.26 to 111.77)  | 104.78<br>(89.26 to 103.49)  | 94.39<br>(75.25 to 95.40)    | 87.13<br>(69.70 to 101.16)   | 80.59<br>(63.50 to 101.16)   | 73.84<br>(56.50 to 101.16)   | 67.22<br>(49.73 to 101.16)   |
| China                                         | 129.90<br>(120.21 to 140.44) | 123.78<br>(114.17 to 132.62) | 118.17<br>(109.02 to 127.75) | 111.17<br>(102.84 to 130.09) | 104.78<br>(95.26 to 111.77)  | 100.04<br>(89.26 to 103.49)  | 94.39<br>(82.62 to 103.49)   | 88.74<br>(75.25 to 95.40)    | 80.59<br>(63.50 to 101.16)   | 73.84<br>(56.50 to 101.16)   | 67.22<br>(49.73 to 101.16)   |
| North Korea                                   | 5.36<br>(4.53 to 6.08)       | 4.60<br>(4.00 to 5.82)       | 4.43<br>(4.00 to 5.82)       | 4.43<br>(4.00 to 5.82)       | 4.43<br>(4.00 to 5.82)       | 4.43<br>(4.00 to 5.82)       | 4.43<br>(4.00 to 5.82)       | 4.43<br>(4.00 to 5.82)       | 4.43<br>(4.00 to 5.82)       | 4.43<br>(4.00 to 5.82)       | 4.43<br>(4.00 to 5.82)       |
| Taiwan (Province of China)                    | 1.10<br>(1.04 to 1.17)       | 1.06<br>(1.01 to 1.05)       | 0.99<br>(0.94 to 1.05)       | 0.87<br>(0.82 to 1.05)       | 0.85<br>(0.80 to 1.05)       | 0.82<br>(0.77 to 1.05)       | 0.82<br>(0.77 to 1.05)       | 0.82<br>(0.77 to 1.05)       | 0.82<br>(0.77 to 1.05)       | 0.82<br>(0.77 to 1.05)       | 0.82<br>(0.77 to 1.05)       |
| <b>Southeast Asia</b>                         | 131.71<br>(128.01 to 135.32) | 123.51<br>(123.94 to 111.05) | 123.51<br>(119.88 to 126.91) | 119.32<br>(116.01 to 122.59) | 115.85<br>(111.68 to 118.13) | 112.09<br>(107.26 to 113.16) | 108.29<br>(102.26 to 108.22) | 104.5                        |                              |                              |                              |

|                             | 2006                | 2007               | 2008               | 2009               | 2010               | 2011               | 2012               | 2013               | 2014               | 2015               | 2016               |
|-----------------------------|---------------------|--------------------|--------------------|--------------------|--------------------|--------------------|--------------------|--------------------|--------------------|--------------------|--------------------|
| Morocco                     | (7.88 to 8.27)      | 7.58               | 7.10               | 6.66               | 6.26               | 5.89               | 5.53               | 5.18               | 4.85               | 4.52               | 4.27               |
| Palentine                   | (0.81 to 1.03)      | (0.87 to 1.12)     | (0.95 to 1.21)     | (1.02 to 1.31)     | (1.09 to 1.40)     | (1.14 to 1.47)     | (1.17 to 1.51)     | (1.19 to 1.53)     | (1.17 to 1.52)     | (1.15 to 1.49)     | (1.10 to 1.43)     |
| Oman                        | (0.63 to 0.69)      | (0.60 to 0.64)     | (0.59 to 0.64)     | (0.59 to 0.65)     | (0.58 to 0.64)     | (0.59 to 0.65)     | (0.61 to 0.67)     | (0.63 to 0.70)     | (0.63 to 0.70)     | (0.59 to 0.66)     | (0.55 to 0.62)     |
| Qatar                       | 0.07                | 0.08               | 0.09               | 0.10               | 0.10               | 0.11               | 0.11               | 0.12               | 0.12               | 0.12               | 0.12               |
| Saudi Arabia                | (0.05 to 0.08)      | (0.05 to 0.08)     | (0.05 to 0.08)     | (0.05 to 0.08)     | (0.05 to 0.08)     | (0.05 to 0.08)     | (0.05 to 0.08)     | (0.05 to 0.08)     | (0.05 to 0.08)     | (0.05 to 0.08)     | (0.05 to 0.08)     |
| Sudan                       | (7.17 to 8.07)      | (6.66 to 7.46)     | (6.12 to 6.83)     | (5.61 to 6.31)     | (5.15 to 5.83)     | (4.68 to 5.34)     | (4.18 to 4.90)     | (3.73 to 4.48)     | (3.31 to 4.04)     | (2.91 to 3.64)     | (2.50 to 3.24)     |
| Syria                       | 3.35                | 3.38               | 3.49               | 3.49               | 3.50               | 3.50               | 3.50               | 3.50               | 3.50               | 3.50               | 3.50               |
| Tunisia                     | (1.31 to 1.42)      | (1.29 to 1.43)     | (1.34 to 1.49)     | (1.46 to 1.63)     | (1.56 to 1.79)     | (1.64 to 1.84)     | (1.70 to 1.92)     | (1.74 to 1.97)     | (1.76 to 1.99)     | (1.76 to 1.99)     | (1.74 to 1.97)     |
| Turkey                      | 14.46               | 13.83              | 13.30              | 13.02              | 12.79              | 12.53              | 12.34              | 12.14              | 11.97              | 11.83              | 11.70              |
| United Arab Emirates        | 0.31                | 0.37               | 0.42               | 0.48               | 0.52               | 0.57               | 0.61               | 0.65               | 0.69               | 0.73               | 0.77               |
| Yemen                       | (0.29 to 0.33)      | (0.34 to 0.39)     | (0.40 to 0.45)     | (0.44 to 0.51)     | (0.48 to 0.56)     | (0.49 to 0.57)     | (0.48 to 0.56)     | (0.46 to 0.54)     | (0.44 to 0.52)     | (0.41 to 0.49)     | (0.39 to 0.47)     |
| South Asia                  | 982.13              | 943.99             | 905.38             | 865.55             | 824.38             | 780.69             | 733.74             | 683.71             | 629.24             | 574.96             | 524.20             |
| South Asia                  | (948.09 to 1016.95) | (912.62 to 975.87) | (876.91 to 933.64) | (838.83 to 891.52) | (799.76 to 849.52) | (757.14 to 803.97) | (711.12 to 756.11) | (669.76 to 706.15) | (629.50 to 661.43) | (593.83 to 596.81) | (551.24 to 555.97) |
| Bangladesh                  | 88.79               | 84.56              | 80.17              | 75.80              | 71.55              | 67.31              | 63.08              | 58.86              | 54.63              | 49.70              | 45.93              |
| Bhutan                      | (0.42 to 0.49)      | (0.47 to 0.54)     | (0.51 to 0.58)     | (0.55 to 0.62)     | (0.59 to 0.66)     | (0.62 to 0.69)     | (0.65 to 0.72)     | (0.68 to 0.75)     | (0.70 to 0.77)     | (0.71 to 0.78)     | (0.72 to 0.79)     |
| India                       | 709.80              | 674.00             | 637.91             | 601.79             | 566.36             | 531.39             | 496.91             | 462.93             | 429.46             | 396.50             | 364.07             |
| India                       | (678.76 to 740.71)  | (645.75 to 707.58) | (613.28 to 662.39) | (579.43 to 622.51) | (545.34 to 585.23) | (509.66 to 547.38) | (473.46 to 508.90) | (436.66 to 471.23) | (398.66 to 432.15) | (361.21 to 394.84) | (323.96 to 367.28) |
| Nepal                       | 19.41               | 18.18              | 16.94              | 15.71              | 14.48              | 13.25              | 12.02              | 10.79              | 9.56               | 8.33               | 7.10               |
| Nepal                       | (18.91 to 19.92)    | (18.35 to 19.27)   | (17.78 to 18.62)   | (17.23 to 18.02)   | (16.70 to 17.38)   | (16.20 to 16.73)   | (15.73 to 16.13)   | (15.27 to 15.63)   | (14.83 to 15.15)   | (14.41 to 14.69)   | (14.01 to 14.27)   |
| Pakistan                    | 163.64              | 166.16             | 168.66             | 169.94             | 169.94             | 167.53             | 162.77             | 154.61             | 144.61             | 133.45             | 121.11             |
| Pakistan                    | (158.23 to 169.18)  | (160.55 to 171.86) | (163.55 to 174.41) | (166.55 to 175.72) | (169.55 to 175.72) | (172.55 to 175.72) | (175.55 to 175.72) | (178.55 to 175.72) | (181.55 to 175.72) | (184.55 to 175.72) | (187.55 to 175.72) |
| Sub-Saharan Africa          | 882.11              | 874.54             | 877.34             | 877.34             | 877.34             | 877.34             | 877.34             | 877.34             | 877.34             | 877.34             | 877.34             |
| Sub-Saharan Africa          | (827.41 to 941.25)  | (824.93 to 938.05) | (824.60 to 935.03) | (823.14 to 930.67) | (816.26 to 921.65) | (805.51 to 906.45) | (792.59 to 891.12) | (780.49 to 876.94) | (769.17 to 860.90) | (757.92 to 839.91) | (746.86 to 819.12) |
| Southern Sub-Saharan Africa | 26.09               | 26.31              | 26.49              | 26.52              | 26.52              | 26.52              | 26.52              | 26.52              | 26.52              | 26.52              | 26.52              |
| Southern Sub-Saharan Africa | (26.09 to 31.49)    | (26.34 to 32.49)   | (27.52 to 33.45)   | (27.56 to 33.66)   | (27.58 to 33.21)   | (26.99 to 32.11)   | (25.99 to 31.15)   | (24.76 to 30.75)   | (23.52 to 29.07)   | (22.52 to 28.07)   | (21.72 to 27.07)   |
| Botswana                    | (0.47 to 0.64)      | (0.46 to 0.61)     | (0.44 to 0.61)     | (0.43 to 0.58)     | (0.42 to 0.56)     | (0.41 to 0.52)     | (0.41 to 0.48)     | (0.39 to 0.44)     | (0.38 to 0.41)     | (0.36 to 0.39)     | (0.32 to 0.37)     |
| Lesotho                     | 1.41                | 1.39               | 1.37               | 1.32               | 1.27               | 1.21               | 1.14               | 1.06               | 0.98               | 0.91               | 0.82               |
| Lesotho                     | (1.29 to 1.56)      | (1.27 to 1.53)     | (1.25 to 1.51)     | (1.20 to 1.45)     | (1.14 to 1.38)     | (1.04 to 1.25)     | (0.97 to 1.17)     | (0.92 to 1.10)     | (0.89 to 1.08)     | (0.89 to 1.07)     | (0.89 to 1.07)     |
| Namibia                     | 0.72                | 0.72               | 0.72               | 0.72               | 0.72               | 0.72               | 0.72               | 0.72               | 0.72               | 0.72               | 0.72               |
| Namibia                     | (0.59 to 0.87)      | (0.59 to 0.86)     | (0.59 to 0.86)     | (0.59 to 0.91)     | (0.59 to 0.91)     | (0.59 to 0.89)     | (0.59 to 0.87)     | (0.59 to 0.84)     | (0.59 to 0.80)     | (0.59 to 0.78)     | (0.59 to 0.76)     |
| South Africa                | 12.85               | 12.90              | 12.90              | 12.90              | 12.90              | 12.90              | 12.90              | 12.90              | 12.90              | 12.90              | 12.90              |
| South Africa                | (11.98 to 13.73)    | (12.02 to 13.76)   | (11.99 to 13.78)   | (11.88 to 13.50)   | (11.15 to 12.86)   | (10.52 to 12.26)   | (10.10 to 11.97)   | (10.13 to 11.97)   | (10.18 to 12.06)   | (9.97 to 11.86)    | (9.66 to 11.57)    |
| Swaziland                   | 0.43                | 0.43               | 0.43               | 0.43               | 0.43               | 0.43               | 0.43               | 0.43               | 0.43               | 0.43               | 0.43               |
| Swaziland                   | (0.37 to 0.50)      | (0.37 to 0.50)     | (0.39 to 0.53)     | (0.40 to 0.53)     | (0.38 to 0.51)     | (0.36 to 0.48)     | (0.33 to 0.44)     | (0.33 to 0.44)     | (0.30 to 0.41)     | (0.30 to 0.41)     | (0.30 to 0.41)     |
| Zimbabwe                    | 12.62               | 13.49              | 14.31              | 14.78              | 14.95              | 14.78              | 14.22              | 13.67              | 13.17              | 12.25              | 11.40              |
| Zimbabwe                    | (10.75 to 14.74)    | (11.50 to 14.84)   | (12.54 to 16.64)   | (12.54 to 16.64)   | (12.67 to 17.64)   | (12.67 to 17.64)   | (12.67 to 17.64)   | (12.67 to 17.64)   | (12.67 to 17.64)   | (12.67 to 17.64)   | (12.67 to 17.64)   |
| Western Sub-Saharan Africa  | 454.85              | 452.90             | 451.85             | 450.73             | 447.55             | 440.78             | 433.64             | 426.47             | 419.82             | 406.79             | 394.65             |
| Western Sub-Saharan Africa  | (414.06 to 509.97)  | (412.41 to 497.56) | (412.29 to 495.94) | (412.14 to 484.89) | (409.58 to 490.01) | (403.14 to 482.09) | (397.17 to 473.70) | (391.00 to 466.11) | (384.43 to 459.98) | (374.01 to 445.52) | (364.86 to 432.22) |
| Benin                       | 7.33                | 7.22               | 7.12               | 7.00               | 6.85               | 6.71               | 6.58               | 6.46               | 6.34               | 6.20               | 6.09               |
| Benin                       | (7.11 to 7.59)      | (7.16 to 7.55)     | (7.16 to 7.43)     | (7.13 to 7.40)     | (7.10 to 7.40)     | (7.07 to 7.35)     | (7.13 to 7.36)     | (7.04 to 7.33)     | (7.02 to 7.30)     | (6.92 to 7.30)     | (6.78 to 7.21)     |
| Burkina Faso                | 11.30               | 11.22              | 11.12              | 11.01              | 10.85              | 10.61              | 10.33              | 10.10              | 9.82               | 9.79               | 9.79               |
| Burkina Faso                | (10.67 to 11.94)    | (10.67 to 11.94)   | (10.67 to 11.94)   | (10.67 to 11.94)   | (10.67 to 11.94)   | (10.67 to 11.94)   | (10.67 to 11.94)   | (10.67 to 11.94)   | (10.67 to 11.94)   | (10.67 to 11.94)   | (10.67 to 11.94)   |
| Cameroon                    | 15.77               | 15.86              | 15.96              | 16.07              | 16.10              | 16.07              | 16.07              | 16.07              | 16.07              | 16.07              | 16.07              |
| Cameroon                    | (14.69 to 16.86)    | (14.76 to 16.96)   | (14.87 to 17.07)   | (14.98 to 17.20)   | (14.98 to 17.26)   | (14.98 to 17.25)   | (14.98 to 17.22)   | (14.98 to 17.05)   | (14.63 to 16.85)   | (14.40 to 16.62)   | (14.24 to 16.46)   |
| Cape Verde                  | 0.18                | 0.17               | 0.17               | 0.17               | 0.17               | 0.17               | 0.17               | 0.17               | 0.17               | 0.17               | 0.17               |
| Cape Verde                  | (0.15 to 0.21)      | (0.15 to 0.20)     | (0.14 to 0.19)     | (0.14 to 0.18)     | (0.13 to 0.18)     | (0.12 to 0.17)     | (0.12 to 0.16)     | (0.12 to 0.16)     | (0.11 to 0.15)     | (0.10 to 0.14)     | (0.10 to 0.13)     |
| Chad                        | 17.66               | 17.78              | 17.87              | 17.97              | 18.04              | 18.14              | 18.25              | 18.34              | 18.43              | 18.57              | 18.77              |
| Chad                        | (17.00 to 18.16)    | (17.07 to 18.23)   | (17.18 to 18.36)   | (17.29 to 18.57)   | (17.40 to 18.66)   | (17.50 to 18.77)   | (17.60 to 18.89)   | (17.74 to 18.99)   | (17.94 to 19.18)   | (18.13 to 19.40)   | (18.18 to 19.46)   |
| Cote d'Ivoire               | 17.60               | 17.60              | 17.60              | 17.60              | 17.60              | 17.60              | 17.60              | 17.60              | 17.60              | 17.60              | 17.60              |
| Cote d'Ivoire               | (17.16 to 18.04)    | (17.11 to 17.99)   | (17.00 to 17.88)   | (16.78 to 17.79)   | (16.78 to 17.62)   | (16.64 to 17.53)   | (16.47 to 17.34)   | (16.31 to 17.18)   | (16.09 to 16.94)   | (15.79 to 16.63)   | (15.43 to 16.28)   |
| The Gambia                  | 1.92                | 1.90               | 1.88               | 1.85               | 1.82               | 1.79               | 1.76               | 1.73               | 1.70               | 1.67               | 1.64               |
| The Gambia                  | (1.85 to 1.98)      | (1.84 to 1.94)     | (1.84 to 1.94)     | (1.84 to 1.94)     | (1.84 to 1.94)     | (1.84 to 1.94)     | (1.84 to 1.94)     | (1.84 to 1.94)     | (1.84 to 1.94)     | (1.84 to 1.94)     | (1.84 to 1.94)     |
| Ghana                       | 17.15               | 17.41              | 17.63              | 17.81              | 18.00              | 18.18              | 18.36              | 18.54              | 18.72              | 18.90              | 19.08              |
| Ghana                       | (15.99 to 18.42)    | (16.20 to 18.81)   | (16.33 to 19.14)   | (16.58 to 19.44)   | (16.68 to 19.44)   | (16.68 to 19.43)   | (16.68 to 19.43)   | (16.68 to 19.43)   | (16.68 to 19.43)   | (16.68 to 19.43)   | (16.68 to 19.43)   |
| Guinea                      | 9.05                | 8.96               | 8.87               | 8.82               | 8.75               | 8.68               | 8.61               | 8.54               | 8.47               | 8.41               | 8.35               |
| Guinea                      | (8.79 to 9.36)      | (8.65 to 9.27)     | (8.56 to 9.18)     | (8.52 to 9.13)     | (8.44 to 9.06)     | (8.32 to 8.93)     | (8.21 to 8.83)     | (8.09 to 8.70)     | (7.92 to 8.53)     | (7.72 to 8.30)     | (7.50 to 8.08)     |
| Guinea-Bissau               | 3.99                | 3.99               | 3.99               | 3.99               | 3.99               | 3.99               | 3.99               | 3.99               | 3.99               | 3.99               | 3.99               |
| Guinea-Bissau               | (2.05 to 3.00)      | (2.07 to 3.42)     | (2.02 to 3.35)     | (2.02 to 3.30)     | (2.02 to 3.25)     | (2.02 to 3.16)     | (2.02 to 3.06)     | (2.02 to 3.06)     | (2.02 to 3.06)     | (2.02 to 3.06)     | (2.02 to 3.06)     |
| Liberia                     | 3.27                | 3.19               | 3.13               | 3.09               | 3.04               | 2.99               | 2.94               | 2.89               | 2.84               | 2.79               | 2.74               |
| Liberia                     | (2.09 to 3.41)      | (2.07 to 3.42)     | (2.02 to 3.35)     | (2.02 to 3.30)     | (2.02 to 3.25)     | (2.02 to 3.16)     | (2.02 to 3.06)     | (2.02 to 3.06)     | (2.02 to 3.06)     | (2.02 to 3.06)     | (2.02 to 3.06)     |
| Mali                        | 2.26                | 2.21               | 2.15               | 2.10               | 2.04               | 1.98               | 1.92               | 1.87               | 1.82               | 1.77               | 1.72               |
| Mali                        | (2.09 to 2.43)      | (2.09 to 2.43)     | (2.09 to 2.43)     | (2.09 to 2.43)     | (2.09 to 2.43)     | (2.09 to 2.43)     | (2.09 to 2.43)     | (2.09 to 2.43)     | (2.09 to 2.43)     | (2.09 to 2.43)     | (2.09 to 2.43)     |
| Mauritania                  | 18.43               | 18.20              | 18.14              | 18.14              | 18.14              | 18.14              | 18.14              | 18.14              | 18.14              | 18.14              | 18.14              |
| Mauritania                  | (18.00 to 19.30)    | (17.79 to 19.09)   | (17.58 to 18.86)   | (17.53 to 18.80)   | (17.53 to 18.80)   | (17.53 to 18.82)   | (17.53 to 18.84)   | (17.53 to 18.89)   | (17.53 to 18.95)   | (17.72 to 19.01)   | (17.72 to 19.02)   |
| Niger                       | 26.03               | 26.42              | 26.81              | 27.20              | 27.59              | 27.98              | 28.37              | 28.76              | 29.15              | 29.54              | 29.93              |
| Niger                       | (24.97 to 32.15)    | (24.56 to 30.72)   | (24.81 to 32.15)   | (24.74 to 31.69)   | (24.58 to 31.84)   | (24.11 to 31.12)   | (23.78 to 30.60)   | (23.40 to 29.25)   | (23.36 to 29.25)   | (23.36 to 29.25)   | (23.36 to 29.25)   |
| Sierra Leone and Principe   | 0.08                | 0.07               | 0.07               | 0.07               | 0.07               | 0.07               | 0.07               | 0.07               | 0.07               | 0.07               | 0.07               |
| Sierra Leone and Principe   | (0.07 to 0.08)      | (0.07 to 0.08)     | (0.07 to 0.08)     | (0.07 to 0.08)     | (0.07 to 0.08)     | (0.07 to 0.08)     | (0.07 to 0.08)     | (0.07 to 0.08)     | (0.07 to 0.08)     | (0.07 to 0.08)     | (0.07 to 0.08)     |
| Senegal                     | 9.70                | 9.48               | 9.33               | 9.18               | 8.99               | 8.79               | 8.59               | 8.39               | 8.20               | 8.04               | 7.87               |
| Senegal                     | (8.26 to 11.27)     | (8.10 to 11.20)    | (8.07 to 11.07)    | (7.88 to 10.86)    | (7.71 to 10.68)    | (7.56 to 10.49)    | (7.32 to 10.30)    | (7.10 to 10.22)    | (6.94 to 10.04)    | (6.80 to 9.89)     | (6.65 to 9.72)     |
| Sierra Leone                | 7.49                | 7.33               | 7.18               | 7.03               | 6.88               | 6.73               | 6.58               | 6.43               | 6.28               | 6.13               | 5.98               |
| Sierra Leone                | (7.19 to 7.87)      | (7.09 to 8.16)     | (6.97 to 8.01)     | (6.83 to 7.87)     | (6.70 to 7.64)     | (6.58 to 7.50)     | (6.48 to 7.35)     | (6.34 to 7.18)     | (6.16 to 7.00)     | (5.96 to 6.77)     | (5.76 to 6.69)     |
| Togo                        | 5.54                | 5.4                |                    |                    |                    |                    |                    |                    |                    |                    |                    |

Appendix Table 19A. Age-standardized mortality rates, both sexes combined, 1970, 1975, 1980, 1985, 1990, 1995, 2000, 2005, 2010, 2016

| Location                  | 1970                            | 1975                            | 1980                            | 1985                            | 1990                            | 1995                            | 2000                            | 2005                            | 2010                            | 2016                            |
|---------------------------|---------------------------------|---------------------------------|---------------------------------|---------------------------------|---------------------------------|---------------------------------|---------------------------------|---------------------------------|---------------------------------|---------------------------------|
| Global                    | 1,526.2<br>(1,507.4 to 1,545.0) | 1,424.1<br>(1,409.7 to 1,438.6) | 1,339.6<br>(1,328.4 to 1,351.7) | 1,266.2<br>(1,256.4 to 1,277.0) | 1,200.2<br>(1,190.6 to 1,209.7) | 1,175.6<br>(1,166.6 to 1,184.3) | 1,111.7<br>(1,103.6 to 1,120.5) | 1,028.3<br>(1,020.1 to 1,036.7) | 928.3<br>(919.0 to 938.2)       | 833.6<br>(821.4 to 846.7)       |
| High SDI                  | 1,047.1<br>(1,038.2 to 1,057.5) | 967.4<br>(959.9 to 975.4)       | 881.4<br>(876.0 to 886.7)       | 820.6<br>(815.7 to 825.5)       | 756.4<br>(752.1 to 760.9)       | 708.0<br>(704.1 to 712.6)       | 644.0<br>(640.4 to 647.7)       | 585.1<br>(581.9 to 588.0)       | 532.5<br>(529.2 to 535.6)       | 504.8<br>(497.9 to 511.5)       |
| High-middle SDI           | 1,226.2<br>(1,200.6 to 1,252.4) | 1,161.8<br>(1,138.7 to 1,183.9) | 1,109.1<br>(1,116.0 to 1,105.3) | 1,083.3<br>(1,085.8 to 1,080.6) | 1,039.3<br>(1,018.2 to 1,060.4) | 1,099.0<br>(1,074.0 to 1,119.1) | 1,009.7<br>(989.4 to 1,031.2)   | 932.0<br>(912.9 to 952.1)       | 798.3<br>(782.6 to 814.9)       | 706.0<br>(666.7 to 753.0)       |
| Middle SDI                | 1,581.7<br>(1,557.0 to 1,607.2) | 1,461.2<br>(1,439.9 to 1,482.5) | 1,394.6<br>(1,375.4 to 1,414.3) | 1,306.7<br>(1,289.8 to 1,324.8) | 1,243.2<br>(1,226.5 to 1,259.7) | 1,177.3<br>(1,163.3 to 1,192.3) | 1,105.3<br>(1,093.3 to 1,118.2) | 1,016.6<br>(1,006.0 to 1,027.8) | 919.4<br>(909.3 to 929.8)       | 822.6<br>(810.0 to 835.8)       |
| Low-middle SDI            | 2,087.9<br>(2,040.9 to 2,139.0) | 1,926.4<br>(1,882.4 to 1,968.4) | 1,760.6<br>(1,730.4 to 1,790.8) | 1,658.7<br>(1,629.3 to 1,684.2) | 1,570.9<br>(1,545.2 to 1,595.0) | 1,523.1<br>(1,497.2 to 1,547.5) | 1,454.4<br>(1,430.0 to 1,479.1) | 1,353.0<br>(1,329.4 to 1,374.4) | 1,239.2<br>(1,215.3 to 1,260.3) | 1,115.5<br>(1,092.6 to 1,139.0) |
| Low SDI                   | 2,818.8<br>(2,195.5 to 2,332.7) | 2,181.8<br>(2,129.1 to 2,234.9) | 2,103.6<br>(2,058.1 to 2,148.8) | 2,009.5<br>(2,005.5 to 2,009.5) | 1,990.6<br>(1,954.0 to 2,032.0) | 1,956.0<br>(1,946.2 to 2,032.3) | 1,906.0<br>(1,913.3 to 1,996.0) | 1,808.2<br>(1,769.9 to 1,846.3) | 1,678.9<br>(1,619.0 to 1,731.2) | 1,436.6<br>(1,394.6 to 1,480.2) |
| High-income               | 1,052.9<br>(1,039.9 to 1,065.9) | 967.4<br>(957.9 to 972.9)       | 881.4<br>(863.0 to 873.5)       | 820.6<br>(798.5 to 808.1)       | 756.4<br>(734.7 to 743.5)       | 708.0<br>(686.1 to 693.9)       | 644.0<br>(627.1 to 634.0)       | 585.1<br>(570.3 to 576.4)       | 532.5<br>(519.4 to 525.3)       | 504.8<br>(490.1 to 503.1)       |
| High-income North America | 1,052.9<br>(999.2 to 1,011.3)   | 967.4<br>(960.2 to 972.7)       | 881.4<br>(815.3 to 825.4)       | 820.6<br>(775.1 to 784.4)       | 756.4<br>(733.3 to 747.7)       | 708.0<br>(711.1 to 720.3)       | 644.0<br>(668.7 to 676.2)       | 585.1<br>(623.4 to 630.2)       | 532.5<br>(578.6 to 574.7)       | 504.8<br>(457.8 to 573.0)       |
| Canada                    | 915.1<br>(898.7 to 931.8)       | 864.2<br>(848.1 to 880.2)       | 770.4<br>(755.8 to 785.7)       | 713.3<br>(699.6 to 726.3)       | 664.9<br>(652.2 to 649.0)       | 637.2<br>(625.2 to 649.0)       | 582.3<br>(571.7 to 593.9)       | 532.7<br>(521.5 to 541.9)       | 480.8<br>(470.8 to 490.3)       | 457.6<br>(442.8 to 470.9)       |
| Greenland                 | 1,911.0<br>(1,814.7 to 2,008.3) | 2,127.6<br>(2,027.1 to 2,215.6) | 2,151.4<br>(2,046.5 to 2,244.1) | 2,247.2<br>(2,160.4 to 2,339.4) | 2,159.9<br>(2,056.5 to 2,269.2) | 2,159.9<br>(1,866.9 to 2,072.8) | 1,972.1<br>(1,818.6 to 2,203.3) | 1,793.7<br>(1,702.0 to 1,883.7) | 1,372.2<br>(1,285.5 to 1,466.7) | 1,224.5<br>(1,061.6 to 1,408.0) |
| United States             | 1,013.8<br>(1,007.5 to 1,020.1) | 911.3<br>(906.8 to 917.4)       | 825.5<br>(819.8 to 830.7)       | 786.8<br>(781.9 to 791.6)       | 745.3<br>(740.9 to 749.9)       | 724.5<br>(719.9 to 729.3)       | 682.7<br>(678.7 to 686.6)       | 638.0<br>(634.9 to 641.4)       | 582.4<br>(579.0 to 585.8)       | 578.3<br>(570.0 to 587.1)       |
| Australasia               | 1,059.8<br>(1,042.2 to 1,069.8) | 951.2<br>(944.2 to 971.5)       | 832.8<br>(836.4 to 859.4)       | 773.4<br>(778.2 to 799.4)       | 696.9<br>(697.6 to 717.5)       | 632.9<br>(633.6 to 651.5)       | 560.0<br>(560.1 to 576.4)       | 496.4<br>(498.2 to 512.1)       | 458.4<br>(458.1 to 472.4)       | 437.4<br>(425.8 to 464.3)       |
| Australia                 | 1,059.8<br>(1,045.5 to 1,077.5) | 951.2<br>(936.0 to 968.3)       | 832.8<br>(819.5 to 846.9)       | 773.4<br>(761.5 to 786.6)       | 696.9<br>(685.0 to 709.4)       | 632.9<br>(623.0 to 643.2)       | 560.0<br>(550.2 to 569.1)       | 496.4<br>(488.7 to 504.5)       | 458.4<br>(450.3 to 467.0)       | 437.4<br>(416.8 to 460.8)       |
| New Zealand               | 1,013.8<br>(1,015.7 to 1,055.7) | 911.3<br>(906.5 to 1,004.8)     | 825.5<br>(808.5 to 1,004.8)     | 786.8<br>(745.5 to 878.4)       | 745.3<br>(749.9 to 776.8)       | 724.5<br>(678.7 to 708.5)       | 682.7<br>(601.4 to 626.0)       | 638.0<br>(548.2 to 561.9)       | 582.4<br>(490.4 to 512.3)       | 578.3<br>(443.6 to 629.8)       |
| High-income Asia Pacific  | 1,141.6<br>(1,089.5 to 1,199.9) | 1,006.1<br>(972.8 to 1,043.9)   | 865.7<br>(850.5 to 881.0)       | 756.5<br>(743.3 to 770.8)       | 675.6<br>(664.2 to 687.8)       | 610.3<br>(599.6 to 623.4)       | 538.2<br>(529.3 to 546.9)       | 479.9<br>(471.7 to 488.8)       | 437.7<br>(429.7 to 445.6)       | 402.4<br>(379.3 to 426.9)       |
| Brunei                    | 1,281.9<br>(1,173.1 to 1,378.3) | 1,104.5<br>(1,035.4 to 1,207.4) | 1,139.0<br>(975.4 to 1,261.7)   | 992.9<br>(939.8 to 1,054.5)     | 910.5<br>(865.0 to 962.9)       | 852.3<br>(802.2 to 1,201.1)     | 761.0<br>(722.8 to 798.8)       | 721.8<br>(692.3 to 751.7)       | 704.7<br>(673.4 to 736.3)       | 705.2<br>(617.2 to 777.2)       |
| Japan                     | 1,284.4<br>(1,015.9 to 1,064.7) | 1,173.5<br>(888.7 to 919.3)     | 1,087.1<br>(777.4 to 782.2)     | 956.8<br>(679.7 to 684.0)       | 788.6<br>(611.1 to 614.9)       | 681.1<br>(557.5 to 565.6)       | 574.6<br>(494.7 to 498.5)       | 504.0<br>(449.8 to 453.5)       | 461.1<br>(415.7 to 419.1)       | 389.5<br>(372.5 to 385.7)       |
| Singapore                 | 1,184.7<br>(1,184.7 to 1,184.7) | 1,092.8<br>(1,082.8 to 1,127.0) | 1,092.8<br>(999.0 to 1,176.1)   | 1,092.8<br>(862.0 to 1,044.3)   | 1,092.8<br>(722.6 to 864.1)     | 1,092.8<br>(625.1 to 740.0)     | 1,092.8<br>(523.8 to 631.3)     | 1,092.8<br>(461.4 to 550.4)     | 1,092.8<br>(398.1 to 469.2)     | 1,092.8<br>(331.7 to 460.4)     |
| South Korea               | 1,220.4<br>(1,220.4 to 1,220.4) | 903.9<br>(1,279.0 to 1,226.6)   | 779.9<br>(1,174.8 to 1,169.9)   | 612.9<br>(815.0 to 1,216.3)     | 561.4<br>(915.8 to 1,077.3)     | 561.4<br>(915.8 to 1,077.3)     | 561.4<br>(805.5 to 954.0)       | 561.4<br>(712.5 to 821.5)       | 561.4<br>(581.7 to 679.6)       | 561.4<br>(393.9 to 579.8)       |
| Western Europe            | 1,034.3<br>(1,023.8 to 1,045.0) | 974.6<br>(965.8 to 983.6)       | 885.7<br>(877.3 to 894.6)       | 818.4<br>(811.0 to 825.9)       | 747.2<br>(740.3 to 754.9)       | 688.5<br>(682.1 to 695.6)       | 625.1<br>(619.2 to 630.8)       | 561.9<br>(556.8 to 566.9)       | 509.1<br>(504.0 to 514.1)       | 475.5<br>(465.9 to 482.8)       |
| Andorra                   | 713.6<br>(576.5 to 886.6)       | 658.3<br>(535.2 to 794.0)       | 600.7<br>(505.4 to 704.6)       | 584.8<br>(494.0 to 684.9)       | 565.4<br>(481.5 to 649.1)       | 528.3<br>(451.6 to 616.1)       | 462.0<br>(403.2 to 536.1)       | 436.7<br>(389.0 to 494.5)       | 431.1<br>(378.4 to 488.3)       | 438.3<br>(374.5 to 511.9)       |
| Austria                   | 1,111.7<br>(1,135.0 to 1,168.5) | 1,043.4<br>(1,054.4 to 1,088.9) | 951.3<br>(974.5 to 1,006.1)     | 864.0<br>(885.0 to 915.6)       | 767.1<br>(781.3 to 806.6)       | 714.2<br>(713.7 to 736.3)       | 657.0<br>(636.4 to 665.2)       | 597.0<br>(568.6 to 587.6)       | 511.0<br>(519.5 to 537.2)       | 485.6<br>(465.3 to 509.6)       |
| Belgium                   | 1,084.9<br>(1,084.9 to 1,142.3) | 1,019.9<br>(1,019.9 to 1,068.2) | 928.7<br>(928.7 to 973.7)       | 850.7<br>(850.7 to 891.6)       | 744.6<br>(744.6 to 787.4)       | 696.2<br>(696.2 to 733.8)       | 646.2<br>(646.2 to 684.7)       | 580.1<br>(580.1 to 612.4)       | 535.3<br>(535.3 to 565.6)       | 521.2<br>(471.7 to 552.3)       |
| Cyprus                    | 1,132.0<br>(1,132.0 to 1,214.2) | 1,102.8<br>(1,119.0 to 1,204.2) | 1,059.9<br>(1,023.8 to 1,090.2) | 909.1<br>(923.8 to 962.5)       | 800.0<br>(873.9 to 982.7)       | 821.7<br>(797.9 to 887.2)       | 740.5<br>(719.9 to 806.6)       | 666.1<br>(647.2 to 686.6)       | 569.9<br>(559.5 to 589.5)       | 542.1<br>(519.0 to 566.4)       |
| Denmark                   | 929.3<br>(888.5 to 968.9)       | 878.9<br>(841.8 to 917.1)       | 861.7<br>(824.9 to 903.9)       | 834.5<br>(798.6 to 872.2)       | 806.3<br>(767.8 to 843.3)       | 796.3<br>(757.0 to 831.3)       | 717.4<br>(682.1 to 751.6)       | 655.4<br>(624.3 to 691.6)       | 583.2<br>(555.6 to 611.7)       | 517.8<br>(474.4 to 568.2)       |
| Finland                   | 1,215.6<br>(1,191.0 to 1,239.5) | 1,065.1<br>(1,041.5 to 1,086.4) | 925.5<br>(905.7 to 946.8)       | 864.1<br>(846.3 to 882.1)       | 827.7<br>(809.9 to 846.2)       | 735.2<br>(718.9 to 750.6)       | 678.1<br>(657.8 to 688.1)       | 598.1<br>(585.4 to 610.7)       | 548.8<br>(537.2 to 560.2)       | 474.4<br>(444.1 to 502.1)       |
| France                    | 962.9<br>(945.8 to 980.3)       | 911.7<br>(893.6 to 929.3)       | 826.8<br>(810.2 to 841.4)       | 738.8<br>(740.0 to 768.3)       | 687.5<br>(659.2 to 685.7)       | 624.1<br>(612.2 to 636.2)       | 579.0<br>(566.8 to 590.6)       | 520.0<br>(509.5 to 530.7)       | 471.6<br>(462.2 to 481.2)       | 485.6<br>(419.6 to 455.3)       |
| Germany                   | 1,131.6<br>(1,094.0 to 1,170.3) | 1,067.2<br>(1,030.8 to 1,101.2) | 988.6<br>(933.6 to 998.6)       | 885.6<br>(854.5 to 916.2)       | 737.5<br>(784.7 to 843.6)       | 672.6<br>(710.9 to 767.7)       | 602.5<br>(636.1 to 682.5)       | 578.5<br>(574.0 to 615.8)       | 537.1<br>(531.6 to 571.9)       | 509.6<br>(482.2 to 547.7)       |
| Greece                    | 868.1<br>(852.4 to 885.7)       | 808.4<br>(792.4 to 825.2)       | 646.0<br>(632.4 to 659.4)       | 738.8<br>(720.4 to 750.4)       | 717.5<br>(702.1 to 733.2)       | 672.6<br>(659.1 to 686.9)       | 627.0<br>(617.0 to 643.4)       | 578.5<br>(567.1 to 590.4)       | 537.1<br>(525.0 to 548.6)       | 509.6<br>(485.2 to 529.5)       |
| Iceland                   | 877.1<br>(850.1 to 903.2)       | 787.8<br>(763.3 to 812.5)       | 706.2<br>(680.8 to 730.8)       | 679.3<br>(658.0 to 700.8)       | 652.0<br>(627.4 to 675.5)       | 629.5<br>(604.8 to 653.1)       | 567.1<br>(546.5 to 589.1)       | 506.2<br>(486.1 to 524.5)       | 469.2<br>(452.0 to 486.6)       | 458.6<br>(427.7 to 492.0)       |
| Ireland                   | 1,101.6<br>(1,062.9 to 1,144.5) | 1,077.3<br>(1,039.9 to 1,120.1) | 1,024.6<br>(987.9 to 1,062.6)   | 947.0<br>(912.6 to 982.2)       | 870.5<br>(835.6 to 903.7)       | 815.0<br>(787.4 to 845.9)       | 754.4<br>(724.3 to 787.4)       | 617.0<br>(593.1 to 641.3)       | 537.6<br>(517.3 to 557.8)       | 502.9<br>(454.7 to 557.7)       |
| Israel                    | 1,032.7<br>(1,032.7 to 1,220.1) | 1,012.8<br>(944.2 to 1,079.0)   | 924.8<br>(854.1 to 994.9)       | 834.5<br>(818.8 to 946.8)       | 738.8<br>(746.5 to 860.2)       | 687.5<br>(673.6 to 787.4)       | 624.1<br>(578.0 to 683.3)       | 546.2<br>(530.2 to 615.6)       | 485.6<br>(448.6 to 521.1)       | 485.6<br>(393.6 to 528.2)       |
| Italy                     | 1,018.0<br>(1,001.1 to 1,034.3) | 964.9<br>(948.0 to 979.2)       | 886.5<br>(871.4 to 901.4)       | 809.0<br>(782.5 to 807.6)       | 707.7<br>(696.6 to 719.6)       | 644.8<br>(634.2 to 655.9)       | 582.3<br>(564.5 to 583.3)       | 513.6<br>(505.9 to 522.7)       | 475.8<br>(468.0 to 483.7)       | 452.2<br>(430.1 to 475.9)       |
| Luxembourg                | 1,172.4<br>(1,140.7 to 1,202.0) | 1,102.0<br>(1,071.3 to 1,133.5) | 909.0<br>(967.9 to 1,028.5)     | 820.9<br>(855.8 to 936.4)       | 723.4<br>(798.7 to 844.9)       | 632.3<br>(701.7 to 745.8)       | 555.3<br>(611.5 to 651.4)       | 555.3<br>(538.0 to 573.0)       | 483.9<br>(476.4 to 508.0)       | 462.4<br>(424.9 to 500.9)       |
| Malta                     | 1,184.0<br>(1,184.0 to 1,350.2) | 1,102.0<br>(1,119.5 to 1,269.7) | 1,028.5<br>(1,089.7 to 1,230.5) | 910.0<br>(915.0 to 1,041.6)     | 820.9<br>(763.8 to 871.1)       | 723.4<br>(676.4 to 773.5)       | 632.3<br>(663.8 to 758.0)       | 555.3<br>(561.4 to 641.5)       | 483.9<br>(470.9 to 579.0)       | 462.4<br>(425.0 to 506.9)       |
| Netherlands               | 921.5<br>(892.9 to 947.3)       | 860.2<br>(834.2 to 885.1)       | 781.0<br>(756.6 to 805.9)       | 704.0<br>(728.2 to 773.8)       | 616.9<br>(693.0 to 737.9)       | 546.4<br>(673.4 to 714.2)       | 483.9<br>(646.0 to 685.2)       | 431.1<br>(573.5 to 610.1)       | 389.5<br>(509.5 to 542.3)       | 389.5<br>(456.6 to 520.7)       |
| Norway                    | 899.1<br>(873.9 to 925.6)       | 847.2<br>(823.4 to 873.0)       | 791.0<br>(764.4 to 816.0)       | 762.2<br>(734.3 to 786.0)       | 724.4<br>(703.3 to 747.7)       | 673.5<br>(653.4 to 695.8)       | 627.0<br>(607.4 to 647.4)       | 552.3<br>(534.1 to 570.8)       | 509.5<br>(493.1 to 526.6)       | 464.3<br>(427.7 to 502.9)       |
| Portugal                  | 1,194.8<br>(1,194.8 to 1,238.8) | 1,128.8<br>(1,076.0 to 1,124.7) | 1,009.2<br>(978.3 to 1,019.4)   | 933.8<br>(890.5 to 928.2)       | 850.3<br>(832.9 to 868.8)       | 791.4<br>(776.1 to 808.9)       | 718.8<br>(704.2 to 733.0)       | 632.7<br>(617.8 to 648.3)       | 532.7<br>(545.8 to 571.6)       | 485.6<br>(481.3 to 534.6)       |
| Spain                     | 989.5<br>(976.3 to 1,003.7)     | 913.9<br>(901.8 to 927.0)       | 826.8<br>(782.7 to 804.0)       | 738.8<br>(727.9 to 748.1)       | 687.5<br>(680.5 to 700.9)       | 632.3<br>(627.8 to 645.5)       | 579.0<br>(572.3 to 588.7)       | 520.0<br>(523.0 to 537.3)       | 471.6<br>(457.0 to 470.2)       | 485.6<br>(406.6 to 437.1)       |
| Sweden                    | 875.4<br>(836.2 to 913.7)       | 797.5<br>(813.5 to 875.1)       | 704.0<br>(779.4 to 814.9)       | 624.1<br>(672.5 to 704.6)       | 546.4<br>(610.4 to 639.5)       | 483.9<br>(610.4 to 639.5)       | 424.1<br>(570.6 to 597.9)       | 389.5<br>(529.3 to 555.2)       | 389.5<br>(481.8 to 504.6)       | 389.5<br>(428.8 to 514.2)       |
| Switzerland               | 967.1<br>(924.0 to 1,011.1)     | 848.6<br>(810.0 to 886.6)       | 790.0<br>(753.2 to 828.0)       | 710.8<br>(679.1 to 745.4)       | 676.0<br>(646.4 to 706.0)       | 623.8<br>(597.8 to 653.6)       | 556.5<br>(530.6 to 584.3)       | 496.1<br>(476.1 to 518.0)       | 453.0<br>(432.1 to 473.5)       | 415.9<br>(346.1 to 501.4)       |
| United Kingdom            | 1,024.4<br>(1,012.2 to 1,037.4) | 988.4<br>(977.9 to 999.2)       | 920.7<br>(913.4 to 928.7)       | 861.6<br>(854.5 to 868.1)       | 787.6<br>(781.1 to 793.4)       | 735.6<br>(729.6 to 741.6)       | 668.4<br>(662.9 to 673.8)       | 599.6<br>(595.0 to 604.5)       | 532.4                           |                                 |

Appendix Table 19A. Age-standardized mortality rates, both sexes combined, 1970, 1975, 1980, 1985, 1990, 1995, 2000, 2005, 2010, 2016

| Location                    | 1970                            | 1975                            | 1980                            | 1985                            | 1990                            | 1995                            | 2000                            | 2005                            | 2010                            | 2016                            |
|-----------------------------|---------------------------------|---------------------------------|---------------------------------|---------------------------------|---------------------------------|---------------------------------|---------------------------------|---------------------------------|---------------------------------|---------------------------------|
| Poland                      | 1,115.0<br>(1,086.8 to 1,142.7) | 1,067.6<br>(1,038.4 to 1,094.1) | 1,099.6<br>(1,074.5 to 1,129.6) | 1,102.3<br>(1,073.5 to 1,131.1) | 1,073.1<br>(1,044.9 to 1,100.9) | 1,014.6<br>(988.2 to 1,041.3)   | 891.6<br>(868.0 to 915.7)       | 796.6<br>(773.4 to 819.6)       | 730.4<br>(710.8 to 748.2)       | 643.7<br>(599.9 to 691.6)       |
| Romania                     | 1,181.5<br>(1,148.3 to 1,216.8) | 1,104.1<br>(1,070.7 to 1,137.1) | 1,154.1<br>(1,119.4 to 1,191.1) | 1,130.4<br>(1,094.8 to 1,167.5) | 1,094.6<br>(1,055.2 to 1,135.9) | 1,022.3<br>(1,113.2 to 1,189.2) | 959.2<br>(983.9 to 1,061.0)     | 927.1<br>(927.1 to 992.9)       | 846.3<br>(846.3 to 913.7)       | 791.1<br>(734.7 to 851.9)       |
| Serbia                      | 1,066.5<br>(995.8 to 1,145.0)   | 999.5<br>(924.7 to 1,087.2)     | 976.0<br>(895.9 to 1,067.2)     | 966.5<br>(883.7 to 1,043.1)     | 970.5<br>(906.5 to 1,042.6)     | 1,096.8<br>(1,047.4 to 1,152.3) | 1,038.4<br>(990.3 to 1,085.2)   | 973.2<br>(924.9 to 1,022.3)     | 874.1<br>(841.1 to 905.1)       | 774.1<br>(741.5 to 807.1)       |
| Slovakia                    | 1,184.1<br>(1,146.7 to 1,224.3) | 1,141.3<br>(1,107.9 to 1,176.6) | 1,145.0<br>(1,108.7 to 1,181.4) | 1,136.5<br>(1,102.0 to 1,171.9) | 1,115.2<br>(1,079.9 to 1,150.0) | 1,015.0<br>(983.2 to 1,047.0)   | 957.1<br>(926.8 to 989.1)       | 894.1<br>(866.8 to 922.1)       | 809.2<br>(785.1 to 835.8)       | 718.6<br>(655.9 to 788.3)       |
| Slovenia                    | 1,302.0<br>(1,077.1 to 1,585.3) | 1,220.1<br>(1,025.5 to 1,459.1) | 1,142.9<br>(1,009.8 to 1,270.7) | 1,142.9<br>(993.2 to 1,123.5)   | 922.8<br>(870.0 to 976.9)       | 862.6<br>(816.0 to 918.6)       | 788.6<br>(723.8 to 846.4)       | 708.0<br>(635.5 to 722.5)       | 582.6<br>(550.9 to 616.1)       | 518.4<br>(462.2 to 570.6)       |
| Central Asia                | 1,275.7<br>(1,277.9 to 1,484.6) | 1,258.8<br>(1,192.7 to 1,373.2) | 1,248.6<br>(1,148.3 to 1,249.3) | 1,258.8<br>(1,117.5 to 1,183.8) | 1,258.8<br>(1,123.3 to 1,179.6) | 1,258.8<br>(1,271.7 to 1,339.9) | 1,258.8<br>(1,233.2 to 1,298.6) | 1,258.8<br>(1,226.1 to 1,298.7) | 1,258.8<br>(1,094.2 to 1,155.3) | 1,258.8<br>(935.2 to 1,031.2)   |
| Armenia                     | 1,115.4<br>(971.9 to 1,265.5)   | 1,020.4<br>(887.5 to 1,158.9)   | 957.0<br>(887.7 to 1,034.7)     | 938.0<br>(899.6 to 980.5)       | 991.6<br>(950.8 to 1,035.4)     | 1,068.7<br>(1,022.1 to 1,116.6) | 932.0<br>(893.1 to 973.7)       | 921.5<br>(877.1 to 967.5)       | 898.8<br>(861.0 to 943.7)       | 749.7<br>(686.3 to 809.0)       |
| Azerbaijan                  | 1,368.8<br>(1,194.3 to 1,540.3) | 1,226.7<br>(1,088.9 to 1,381.8) | 1,176.8<br>(1,077.5 to 1,277.5) | 1,184.7<br>(1,124.5 to 1,256.1) | 1,189.7<br>(1,124.1 to 1,247.3) | 1,294.4<br>(1,230.9 to 1,366.8) | 1,251.5<br>(1,183.3 to 1,318.2) | 1,212.5<br>(1,128.7 to 1,293.8) | 1,174.8<br>(1,092.3 to 1,255.2) | 936.2<br>(836.9 to 1,063.6)     |
| Georgia                     | 1,215.2<br>(1,030.5 to 1,407.4) | 1,108.8<br>(940.2 to 1,304.9)   | 1,022.7<br>(919.9 to 1,116.0)   | 1,026.4<br>(964.9 to 1,089.3)   | 1,047.3<br>(987.5 to 1,110.0)   | 992.5<br>(938.2 to 1,053.6)     | 925.0<br>(875.2 to 994.5)       | 945.3<br>(899.9 to 992.1)       | 900.0<br>(855.2 to 949.4)       | 843.7<br>(718.0 to 954.6)       |
| Kazakhstan                  | 1,384.1<br>(1,097.4 to 1,707.6) | 1,303.3<br>(1,050.6 to 1,595.3) | 1,227.4<br>(1,084.2 to 1,390.2) | 1,147.9<br>(1,048.5 to 1,244.7) | 1,142.1<br>(1,068.6 to 1,222.0) | 1,420.7<br>(1,319.0 to 1,525.8) | 1,389.0<br>(1,285.9 to 1,495.8) | 1,395.9<br>(1,294.2 to 1,494.8) | 1,180.8<br>(1,103.2 to 1,269.9) | 968.0<br>(846.2 to 1,118.7)     |
| Kyrgyzstan                  | 1,473.9<br>(1,285.0 to 1,665.3) | 1,460.9<br>(1,207.4 to 1,549.8) | 1,242.8<br>(1,166.7 to 1,322.3) | 1,212.8<br>(1,172.7 to 1,249.9) | 1,213.0<br>(1,174.7 to 1,252.1) | 1,429.5<br>(1,385.1 to 1,473.4) | 1,250.6<br>(1,212.5 to 1,294.8) | 1,202.2<br>(1,158.0 to 1,245.0) | 1,188.9<br>(1,152.9 to 1,226.5) | 990.5<br>(924.5 to 1,059.5)     |
| Mongolia                    | 1,933.4<br>(1,790.3 to 2,084.2) | 1,597.8<br>(1,501.3 to 1,722.5) | 1,597.8<br>(1,465.0 to 1,726.0) | 1,634.5<br>(1,404.2 to 1,626.5) | 1,434.0<br>(1,342.0 to 1,537.9) | 1,595.7<br>(1,505.0 to 1,692.2) | 1,544.8<br>(1,499.3 to 1,671.1) | 1,544.8<br>(1,460.9 to 1,640.1) | 1,544.8<br>(1,270.6 to 1,448.2) | 1,208.8<br>(1,087.6 to 1,330.9) |
| Tajikistan                  | 1,577.0<br>(1,408.8 to 1,719.5) | 1,304.2<br>(1,332.4 to 1,564.4) | 1,304.2<br>(1,205.7 to 1,407.6) | 1,218.2<br>(1,132.6 to 1,313.5) | 1,198.9<br>(1,119.0 to 1,279.0) | 1,287.4<br>(1,193.4 to 1,380.4) | 1,236.8<br>(1,190.7 to 1,374.9) | 1,236.8<br>(1,146.7 to 1,331.1) | 1,236.8<br>(1,006.9 to 1,170.6) | 925.5<br>(839.0 to 1,045.5)     |
| Turkmenistan                | 1,683.1<br>(1,491.5 to 1,807.5) | 1,281.3<br>(1,390.7 to 1,627.5) | 1,281.3<br>(1,314.6 to 1,459.8) | 1,281.3<br>(1,262.8 to 1,355.8) | 1,281.3<br>(1,266.0 to 1,345.8) | 1,281.3<br>(1,334.8 to 1,371.7) | 1,281.3<br>(1,279.8 to 1,371.7) | 1,281.3<br>(1,189.1 to 1,275.9) | 1,281.3<br>(1,056.8 to 1,146.3) | 980.7<br>(937.8 to 1,038.6)     |
| Uzbekistan                  | 1,311.1<br>(1,218.7 to 1,460.4) | 1,246.4<br>(1,132.3 to 1,371.2) | 1,175.0<br>(1,095.0 to 1,263.5) | 1,116.7<br>(1,059.8 to 1,176.0) | 1,123.3<br>(1,073.1 to 1,174.8) | 1,299.9<br>(1,249.7 to 1,361.1) | 1,320.3<br>(1,263.9 to 1,380.1) | 1,332.1<br>(1,265.3 to 1,406.2) | 1,167.2<br>(1,121.0 to 1,215.3) | 1,073.7<br>(989.4 to 1,160.7)   |
| Latin America and Caribbean | 1,390.0<br>(1,354.0 to 1,426.1) | 1,235.2<br>(1,219.0 to 1,253.3) | 1,131.6<br>(1,119.0 to 1,144.8) | 1,092.6<br>(1,088.0 to 1,095.8) | 996.5<br>(987.0 to 1,005.8)     | 945.8<br>(936.0 to 955.4)       | 859.7<br>(850.8 to 868.4)       | 797.1<br>(789.9 to 805.3)       | 793.0<br>(757.9 to 832.8)       | 699.1<br>(685.0 to 713.9)       |
| Central Latin America       | 1,303.3<br>(1,281.8 to 1,326.1) | 1,183.3<br>(1,166.6 to 1,204.0) | 1,103.0<br>(1,049.1 to 1,077.6) | 1,073.0<br>(1,002.7 to 1,033.5) | 905.8<br>(885.0 to 908.2)       | 876.1<br>(842.1 to 863.7)       | 816.0<br>(762.3 to 783.1)       | 745.0<br>(725.0 to 746.0)       | 679.1<br>(694.7 to 717.1)       | 595.6<br>(644.1 to 683.1)       |
| Costa Rica                  | 1,073.4<br>(1,017.3 to 1,074.6) | 916.6<br>(892.0 to 944.5)       | 808.1<br>(759.9 to 808.1)       | 808.1<br>(709.0 to 825.4)       | 927.9<br>(884.2 to 927.9)       | 927.9<br>(856.2 to 896.4)       | 896.4<br>(796.6 to 834.3)       | 896.4<br>(727.9 to 763.4)       | 896.4<br>(663.1 to 695.1)       | 553.4<br>(453.3 to 639.7)       |
| El Salvador                 | 1,418.2<br>(1,363.5 to 1,472.1) | 1,294.9<br>(1,246.0 to 1,341.2) | 1,093.9<br>(1,044.6 to 1,140.9) | 1,155.7<br>(1,091.5 to 1,161.6) | 1,027.7<br>(991.9 to 1,062.7)   | 938.9<br>(900.7 to 973.6)       | 839.3<br>(807.1 to 871.2)       | 800.8<br>(771.1 to 828.1)       | 750.1<br>(722.6 to 780.3)       | 706.7<br>(645.7 to 771.6)       |
| Guatemala                   | 1,988.2<br>(1,791.4 to 2,138.5) | 1,607.4<br>(1,469.4 to 1,760.7) | 1,418.8<br>(1,284.7 to 1,557.6) | 1,330.4<br>(1,221.2 to 1,443.7) | 1,214.2<br>(1,105.7 to 1,312.6) | 1,124.2<br>(1,014.1 to 1,225.7) | 1,013.8<br>(913.1 to 1,125.6)   | 951.4<br>(851.9 to 1,061.3)     | 881.7<br>(791.0 to 979.7)       | 823.5<br>(673.2 to 982.6)       |
| Honduras                    | 1,485.8<br>(1,488.4 to 1,705.8) | 1,185.8<br>(1,274.8 to 1,513.0) | 1,073.6<br>(1,136.1 to 1,371.3) | 988.5<br>(1,153.6 to 1,363.9)   | 869.0<br>(1,052.6 to 1,284.8)   | 734.9<br>(809.8 to 832.5)       | 683.8<br>(724.9 to 745.5)       | 639.8<br>(707.1 to 728.7)       | 618.4<br>(696.2 to 719.0)       | 588.0<br>(657.0 to 688.3)       |
| Mexico                      | 1,376.9<br>(1,309.3 to 1,382.2) | 1,055.8<br>(1,158.6 to 1,212.9) | 950.8<br>(1,055.0 to 1,092.5)   | 1,048.7<br>(971.7 to 1,002.4)   | 704.8<br>(857.1 to 881.6)       | 730.1<br>(809.8 to 832.5)       | 663.8<br>(724.9 to 745.5)       | 639.8<br>(707.1 to 728.7)       | 618.4<br>(696.2 to 719.0)       | 588.0<br>(657.0 to 688.3)       |
| Nicaragua                   | 1,060.3<br>(1,009.8 to 1,113.0) | 895.7<br>(1,024.8 to 1,089.4)   | 783.9<br>(892.1 to 1,010.6)     | 769.5<br>(919.9 to 1,073.8)     | 744.4<br>(683.7 to 727.4)       | 717.6<br>(706.9 to 737.5)       | 641.2<br>(647.4 to 684.8)       | 615.2<br>(616.9 to 648.4)       | 595.9<br>(598.7 to 643.3)       | 547.4<br>(524.6 to 663.5)       |
| Panama                      | 1,208.8<br>(1,152.2 to 1,261.3) | 1,168.5<br>(1,115.9 to 1,218.0) | 1,050.1<br>(1,004.6 to 1,098.8) | 938.5<br>(892.4 to 983.6)       | 883.5<br>(839.9 to 926.3)       | 848.9<br>(802.9 to 900.5)       | 775.0<br>(737.5 to 812.8)       | 725.0<br>(688.1 to 766.0)       | 709.5<br>(672.9 to 750.2)       | 702.2<br>(620.9 to 809.1)       |
| Venezuela                   | 1,275.7<br>(1,502.3 to 2,078.3) | 1,275.7<br>(1,235.5 to 1,317.1) | 1,198.3<br>(1,161.4 to 1,235.9) | 1,156.3<br>(1,091.5 to 1,161.6) | 1,412.2<br>(966.1 to 1,028.8)   | 1,258.9<br>(897.7 to 957.2)     | 1,013.8<br>(765.5 to 813.1)     | 961.1<br>(674.8 to 723.8)       | 901.1<br>(636.3 to 692.2)       | 837.2<br>(553.3 to 654.3)       |
| Andean Latin America        | 1,127.6<br>(1,038.5 to 2,078.8) | 1,092.9<br>(1,038.8 to 1,907.6) | 1,008.8<br>(1,567.5 to 1,761.6) | 935.2<br>(1,457.1 to 1,665.9)   | 875.4<br>(1,326.0 to 1,516.2)   | 809.1<br>(1,181.9 to 1,342.0)   | 737.8<br>(1,034.2 to 1,128.6)   | 679.0<br>(904.9 to 1,025.0)     | 638.9<br>(813.2 to 1,009.3)     | 593.2<br>(720.7 to 971.4)       |
| Ecuador                     | 1,055.9<br>(2,095.4 to 2,601.8) | 1,191.2<br>(1,034.9 to 1,127.3) | 1,143.2<br>(976.4 to 967.2)     | 1,083.3<br>(904.5 to 967.2)     | 923.3<br>(851.4 to 913.6)       | 877.5<br>(783.8 to 951.2)       | 824.1<br>(718.6 to 661.9)       | 824.1<br>(656.9 to 702.8)       | 597.0<br>(558.3 to 639.1)       | 528.0<br>(457.4 to 612.3)       |
| Peru                        | 1,289.7<br>(1,244.6 to 1,335.0) | 1,213.9<br>(1,171.8 to 1,252.7) | 1,131.2<br>(1,093.8 to 1,168.4) | 1,084.0<br>(1,056.8 to 1,112.8) | 1,051.1<br>(1,026.3 to 1,077.7) | 1,024.7<br>(1,001.9 to 1,049.4) | 912.1<br>(924.7 to 976.3)       | 912.1<br>(882.2 to 942.7)       | 1,396.5<br>(941.3 to 1,882.9)   | 798.5<br>(757.2 to 841.8)       |
| Caribbean                   | 1,379.9<br>(1,298.3 to 1,486.3) | 1,239.2<br>(1,218.1 to 1,386.8) | 1,164.9<br>(1,023.1 to 1,188.4) | 1,092.1<br>(902.8 to 1,045.3)   | 1,001.9<br>(815.0 to 920.8)     | 1,004.0<br>(751.2 to 852.3)     | 865.1<br>(729.0 to 820.9)       | 865.1<br>(671.3 to 762.3)       | 824.4<br>(624.5 to 716.6)       | 834.4<br>(598.5 to 1,113.1)     |
| Antigua and Barbuda         | 1,468.9<br>(1,299.6 to 1,468.9) | 1,292.1<br>(1,188.9 to 1,292.1) | 1,210.0<br>(1,122.3 to 1,210.0) | 1,134.0<br>(1,050.0 to 1,134.9) | 1,041.9<br>(963.7 to 1,041.9)   | 864.2<br>(968.7 to 1,040.3)     | 789.6<br>(938.5 to 1,002.9)     | 789.6<br>(832.7 to 894.9)       | 679.0<br>(785.3 to 858.0)       | 684.7<br>(760.7 to 912.2)       |
| Barbados                    | 1,142.9<br>(1,029.4 to 1,142.9) | 1,061.7<br>(965.4 to 1,061.7)   | 958.8<br>(869.6 to 958.8)       | 929.1<br>(841.6 to 929.1)       | 922.5<br>(833.7 to 922.5)       | 913.8<br>(815.0 to 913.8)       | 913.8<br>(725.8 to 816.6)       | 913.8<br>(678.2 to 750.3)       | 913.8<br>(636.5 to 704.2)       | 913.8<br>(653.9 to 740.4)       |
| Belize                      | 1,147.5<br>(1,019.2 to 1,147.5) | 1,147.5<br>(977.9 to 1,076.5)   | 1,065.4<br>(938.7 to 1,065.4)   | 1,065.4<br>(897.3 to 999.4)     | 1,065.4<br>(858.0 to 991.1)     | 1,065.4<br>(953.5 to 1,079.1)   | 1,065.4<br>(1,037.7 to 1,121.8) | 1,065.4<br>(1,037.7 to 1,150.5) | 1,065.4<br>(954.2 to 1,073.1)   | 1,065.4<br>(878.5 to 1,082.1)   |
| Bermuda                     | 1,525.1<br>(1,449.8 to 1,606.6) | 1,450.9<br>(1,376.4 to 1,528.8) | 1,342.1<br>(1,273.6 to 1,416.2) | 1,260.5<br>(1,199.2 to 1,334.9) | 1,240.5<br>(1,172.9 to 1,315.5) | 1,158.3<br>(1,090.8 to 1,226.3) | 1,099.5<br>(1,039.4 to 1,161.6) | 869.7<br>(821.8 to 925.5)       | 731.8<br>(687.1 to 778.4)       | 611.6<br>(547.0 to 680.0)       |
| Cuba                        | 991.3<br>(964.5 to 1,021.4)     | 898.8<br>(875.1 to 923.3)       | 818.7<br>(796.1 to 843.3)       | 790.1<br>(764.1 to 815.5)       | 789.2<br>(765.4 to 813.6)       | 768.5<br>(744.8 to 812.2)       | 697.1<br>(631.4 to 817.7)       | 653.7<br>(611.9 to 875.3)       | 617.0<br>(598.0 to 817.2)       | 590.0<br>(551.2 to 627.6)       |
| Dominica                    | 1,254.5<br>(1,254.5 to 1,388.3) | 1,012.5<br>(1,119.2 to 1,243.2) | 938.0<br>(898.4 to 1,005.4)     | 918.8<br>(896.8 to 1,002.0)     | 918.8<br>(985.1 to 1,048.8)     | 918.8<br>(1,010.7 to 1,127.5)   | 918.8<br>(892.4 to 1,009.4)     | 918.8<br>(862.9 to 976.3)       | 918.8<br>(865.7 to 972.8)       | 918.8<br>(813.1 to 992.6)       |
| Dominican Republic          | 1,049.8<br>(1,049.8 to 1,156.7) | 1,075.0<br>(955.6 to 1,070.0)   | 1,065.0<br>(884.6 to 992.9)     | 1,065.0<br>(877.8 to 982.6)     | 1,065.0<br>(869.4 to 953.7)     | 1,065.0<br>(823.2 to 907.0)     | 1,065.0<br>(743.7 to 848.1)     | 1,065.0<br>(713.9 to 840.0)     | 1,065.0<br>(671.3 to 796.8)     | 1,065.0<br>(617.2 to 770.1)     |
| Grenada                     | 1,046.2<br>(1,046.2 to 1,300.1) | 1,046.2<br>(963.3 to 1,182.6)   | 1,046.2<br>(923.3 to 1,146.4)   | 1,046.2<br>(870.3 to 1,062.0)   | 1,046.2<br>(970.5 to 1,070.2)   | 1,046.2<br>(948.1 to 1,070.2)   | 1,046.2<br>(951.3 to 1,078.0)   | 1,046.2<br>(962.7 to 1,078.0)   | 1,046.2<br>(890.3 to 1,107.4)   | 1,046.2<br>(890.3 to 1,107.4)   |
| Guyana                      | 1,573.3<br>(1,485.9 to 1,673.3) | 1,525.2<br>(1,446.3 to 1,609.8) | 1,444.0<br>(1,359.8 to 1,528.3) | 1,365.5<br>(1,290.5 to 1,438.8) | 1,386.3<br>(1,319.6 to 1,457.9) | 1,339.8<br>(1,285.7 to 1,393.1) | 1,267.3<br>(1,206.0 to 1,325.6) | 1,367.8<br>(1,302.7 to 1,437.4) | 1,367.8<br>(1,287.2 to 1,435.8) | 1,197.3<br>(1,097.4 to 1,304.6) |
| Haiti                       | 2,355.7<br>(2,091.4 to 2,615.7) | 2,238.2<br>(2,004.3 to 2,465.1) | 2,136.1<br>(1,928.6 to 2,347.2) | 2,002.3<br>(1,900.3 to 2,202.3) | 1,973.7<br>(1,866.6 to 2,094.5) | 1,910.7<br>(1,802.0 to 2,022.0) | 1,808.9<br>(1,681.8 to 1,936.8) | 1,726.5<br>(1,564.2 to 1,887.1) | 1,432.3<br>(1,968.9 to 6,673.8) | 1,402.0<br>(1,210.5 to 1,605.2) |
| Jamaica                     | 904.4<br>(1,007.                |                                 |                                 |                                 |                                 |                                 |                                 |                                 |                                 |                                 |



Appendix Table 19A. Age-standardized mortality rates, both sexes combined, 1970, 1975, 1980, 1985, 1990, 1995, 2000, 2005, 2010, 2016

| Location                       | 1970                            | 1975                            | 1980                            | 1985                            | 1990                            | 1995                            | 2000                            | 2005                            | 2010                            | 2016                            |
|--------------------------------|---------------------------------|---------------------------------|---------------------------------|---------------------------------|---------------------------------|---------------------------------|---------------------------------|---------------------------------|---------------------------------|---------------------------------|
| Thailand                       | 1,290.3<br>(1,249.9 to 1,328.5) | 1,169.3<br>(1,133.6 to 1,208.8) | 1,140.0<br>(1,102.5 to 1,176.9) | 1,052.0<br>(1,014.7 to 1,084.4) | 968.1<br>(937.1 to 1,002.2)     | 948.7<br>(909.9 to 984.8)       | 885.3<br>(849.4 to 925.3)       | 789.7<br>(761.9 to 815.7)       | 666.9<br>(643.0 to 693.9)       | 614.5<br>(565.2 to 662.8)       |
| Timor-Leste                    | 2,406.6<br>(2,077.8 to 2,715.5) | 2,448.2<br>(2,138.2 to 2,758.9) | 2,126.9<br>(1,882.4 to 2,406.7) | 1,735.2<br>(1,537.0 to 1,935.5) | 1,554.5<br>(1,393.2 to 1,726.4) | 1,417.9<br>(1,300.0 to 1,550.8) | 1,285.4<br>(1,183.7 to 1,395.1) | 1,140.0<br>(1,031.0 to 1,245.9) | 935.7<br>(824.0 to 1,050.5)     | 876.0<br>(751.7 to 1,011.4)     |
| Vietnam                        | 1,897.4<br>(1,555.5 to 2,277.4) | 1,519.4<br>(1,361.4 to 1,680.5) | 1,349.7<br>(1,219.4 to 1,488.6) | 1,225.2<br>(1,105.5 to 1,344.6) | 1,135.9<br>(1,025.9 to 1,247.8) | 1,080.4<br>(955.9 to 1,191.8)   | 1,028.3<br>(929.6 to 1,109.6)   | 972.3<br>(878.0 to 1,054.0)     | 892.6<br>(806.3 to 972.6)       | 815.1<br>(762.6 to 876.7)       |
| Oceania                        | 1,986.9<br>(1,794.4 to 2,145.1) | 1,956.1<br>(1,780.7 to 2,116.5) | 1,933.1<br>(1,774.0 to 2,095.0) | 1,921.4<br>(1,769.1 to 2,085.4) | 1,904.5<br>(1,747.6 to 2,064.1) | 1,861.1<br>(1,705.0 to 2,026.7) | 1,832.8<br>(1,665.9 to 1,996.5) | 1,834.7<br>(1,671.2 to 2,015.3) | 1,780.1<br>(1,619.4 to 1,958.6) | 1,655.5<br>(1,500.4 to 1,827.4) |
| American Samoa                 | 1,305.9<br>(1,210.8 to 1,406.3) | 1,173.9<br>(1,081.3 to 1,276.6) | 1,132.2<br>(1,041.3 to 1,236.1) | 1,104.6<br>(1,023.1 to 1,201.6) | 1,074.5<br>(1,002.2 to 1,143.6) | 1,060.1<br>(977.1 to 1,153.2)   | 1,010.2<br>(936.0 to 1,094.5)   | 1,002.0<br>(931.5 to 1,084.3)   | 960.5<br>(882.4 to 1,042.3)     | 967.8<br>(847.5 to 1,101.5)     |
| Federated States of Micronesia | 1,723.2<br>(1,486.2 to 1,979.2) | 1,671.9<br>(1,475.7 to 1,952.3) | 1,671.9<br>(1,454.1 to 1,872.7) | 1,671.9<br>(1,427.9 to 1,825.3) | 1,671.9<br>(1,398.9 to 1,789.8) | 1,671.9<br>(1,345.3 to 1,722.1) | 1,671.9<br>(1,301.9 to 1,676.2) | 1,671.9<br>(1,254.9 to 1,674.1) | 1,671.9<br>(1,269.8 to 1,768.2) | 1,671.9<br>(1,245.7 to 1,753.1) |
| Fiji                           | 1,255.1<br>(1,034.2 to 1,651.5) | 1,204.8<br>(1,044.7 to 1,651.8) | 1,026.9<br>(1,047.7 to 1,617.2) | 918.1<br>(1,137.9 to 1,208.7)   | 908.2<br>(952.2 to 1,102.8)     | 891.9<br>(856.9 to 968.2)       | 863.7<br>(829.2 to 960.3)       | 855.5<br>(818.9 to 921.7)       | 855.5<br>(837.2 to 939.6)       | 855.5<br>(898.5 to 1,023.9)     |
| Guam                           | 1,996.7<br>(1,778.5 to 2,201.1) | 1,832.2<br>(1,625.5 to 2,026.3) | 1,798.1<br>(1,616.1 to 1,993.6) | 1,900.0<br>(1,754.8 to 2,061.3) | 1,921.8<br>(1,814.8 to 2,033.2) | 1,907.9<br>(1,828.8 to 1,990.1) | 1,844.4<br>(1,765.6 to 1,930.8) | 1,778.5<br>(1,671.0 to 1,896.9) | 1,732.2<br>(1,596.6 to 1,887.6) | 1,669.6<br>(1,505.4 to 1,836.6) |
| Kiribati                       | 1,683.6<br>(1,445.4 to 1,921.9) | 1,564.8<br>(1,365.0 to 1,761.1) | 1,477.7<br>(1,306.4 to 1,637.7) | 1,450.2<br>(1,328.4 to 1,559.3) | 1,469.6<br>(1,397.0 to 1,541.2) | 1,509.3<br>(1,433.4 to 1,589.5) | 1,597.4<br>(1,502.0 to 1,698.5) | 1,642.6<br>(1,525.3 to 1,771.0) | 1,608.9<br>(1,450.7 to 1,760.7) | 1,508.4<br>(1,335.0 to 1,691.5) |
| Marshall Islands               | 1,189.6<br>(1,019.2 to 1,363.8) | 1,089.6<br>(935.1 to 1,258.1)   | 1,018.8<br>(867.1 to 1,176.8)   | 934.1<br>(839.7 to 1,034.7)     | 904.3<br>(765.1 to 1,043.9)     | 807.3<br>(704.1 to 921.2)       | 756.6<br>(668.4 to 854.3)       | 755.7<br>(668.7 to 851.5)       | 771.6<br>(682.9 to 881.9)       | 784.9<br>(698.7 to 901.8)       |
| Northern Mariana Islands       | 2,180.4<br>(1,871.2 to 2,425.0) | 2,151.5<br>(1,851.4 to 2,387.8) | 2,151.5<br>(1,903.8 to 2,406.8) | 2,151.5<br>(1,917.9 to 2,407.3) | 2,151.5<br>(1,895.9 to 2,381.8) | 2,151.5<br>(1,832.0 to 2,319.0) | 2,151.5<br>(1,781.3 to 2,281.6) | 2,151.5<br>(1,790.7 to 2,308.5) | 2,151.5<br>(1,719.3 to 2,232.6) | 2,151.5<br>(1,565.2 to 2,052.0) |
| Papua New Guinea               | 1,383.8<br>(1,267.6 to 1,449.8) | 1,376.2<br>(1,289.0 to 1,460.6) | 1,376.2<br>(1,189.7 to 1,561.2) | 1,376.2<br>(1,131.6 to 1,544.7) | 1,376.2<br>(1,067.8 to 1,282.1) | 1,376.2<br>(1,028.9 to 1,242.7) | 1,376.2<br>(979.5 to 1,197.9)   | 1,376.2<br>(931.6 to 1,141.4)   | 1,376.2<br>(914.8 to 1,116.3)   | 1,376.2<br>(890.1 to 1,097.7)   |
| Samoa                          | 1,893.4<br>(1,893.4 to 2,467.1) | 1,893.4<br>(1,981.4 to 2,478.5) | 1,893.4<br>(1,767.5 to 2,218.7) | 1,893.4<br>(1,710.2 to 1,510.6) | 1,893.4<br>(1,670.4 to 2,115.7) | 1,893.4<br>(1,632.7 to 2,061.2) | 1,893.4<br>(1,670.3 to 2,050.9) | 1,893.4<br>(1,639.2 to 2,072.4) | 1,893.4<br>(1,579.5 to 2,050.3) | 1,893.4<br>(1,459.6 to 1,959.8) |
| Solomon Islands                | 1,410.9<br>(1,257.4 to 1,578.8) | 1,383.0<br>(1,229.7 to 1,550.8) | 1,394.9<br>(1,237.4 to 1,562.7) | 1,337.5<br>(1,189.2 to 1,491.5) | 1,256.6<br>(1,117.2 to 1,402.6) | 1,217.9<br>(1,094.7 to 1,352.5) | 1,190.8<br>(1,084.8 to 1,317.5) | 1,136.6<br>(1,031.8 to 1,245.7) | 1,108.7<br>(1,002.2 to 1,224.9) | 1,072.6<br>(951.1 to 1,197.2)   |
| Tonga                          | 2,023.6<br>(1,746.4 to 2,282.8) | 1,943.8<br>(1,704.4 to 2,189.3) | 1,854.0<br>(1,651.9 to 2,052.2) | 1,789.5<br>(1,618.7 to 1,994.3) | 1,752.3<br>(1,583.9 to 1,937.1) | 1,720.2<br>(1,541.9 to 1,908.4) | 1,701.3<br>(1,531.8 to 1,892.1) | 1,704.4<br>(1,502.1 to 1,916.4) | 1,645.3<br>(1,444.8 to 1,808.1) | 1,573.4<br>(1,378.0 to 1,844.6) |
| Tanzania                       | 1,468.1<br>(1,573.8 to 1,676.4) | 1,468.1<br>(1,432.5 to 1,504.4) | 1,432.2<br>(1,310.2 to 1,377.8) | 1,432.2<br>(1,210.1 to 1,284.8) | 1,432.2<br>(1,083.9 to 1,129.7) | 1,432.2<br>(1,058.4 to 1,097.1) | 1,432.2<br>(980.7 to 1,019.2)   | 1,432.2<br>(928.7 to 976.3)     | 1,432.2<br>(858.8 to 909.3)     | 1,432.2<br>(804.6 to 867.1)     |
| North Africa and Middle East   | 1,676.4<br>(1,573.8 to 1,676.4) | 1,676.4<br>(1,432.5 to 1,504.4) | 1,676.4<br>(1,310.2 to 1,377.8) | 1,676.4<br>(1,210.1 to 1,284.8) | 1,676.4<br>(1,083.9 to 1,129.7) | 1,676.4<br>(1,058.4 to 1,097.1) | 1,676.4<br>(980.7 to 1,019.2)   | 1,676.4<br>(928.7 to 976.3)     | 1,676.4<br>(858.8 to 909.3)     | 1,676.4<br>(804.6 to 867.1)     |
| Afghanistan                    | 2,425.0<br>(2,199.4 to 2,673.9) | 2,425.0<br>(2,349.0 to 2,667.2) | 2,425.0<br>(2,479.9 to 3,015.0) | 2,425.0<br>(2,413.5 to 3,432.5) | 2,425.0<br>(2,128.2 to 2,385.4) | 2,425.0<br>(2,210.1 to 2,501.1) | 2,425.0<br>(2,236.3 to 2,515.4) | 2,425.0<br>(2,122.9 to 2,394.6) | 2,425.0<br>(1,981.4 to 2,227.9) | 2,425.0<br>(1,849.9 to 1,099.1) |
| Algeria                        | 1,505.7<br>(1,414.4 to 1,597.3) | 1,458.2<br>(1,376.8 to 1,554.5) | 1,365.9<br>(1,302.8 to 1,435.5) | 1,058.2<br>(1,013.0 to 1,104.4) | 934.1<br>(882.2 to 987.8)       | 876.2<br>(824.2 to 930.1)       | 807.5<br>(758.4 to 866.3)       | 736.2<br>(690.5 to 790.6)       | 681.9<br>(614.7 to 710.1)       | 652.6<br>(611.4 to 695.0)       |
| Bahrain                        | 1,289.8<br>(1,154.6 to 1,442.0) | 1,216.8<br>(1,065.8 to 1,388.3) | 1,152.9<br>(1,022.3 to 1,277.3) | 1,172.0<br>(1,065.5 to 1,273.3) | 1,260.0<br>(1,153.3 to 1,380.3) | 1,248.8<br>(1,134.8 to 1,371.4) | 1,127.4<br>(1,031.1 to 1,233.5) | 993.1<br>(899.8 to 1,090.3)     | 828.3<br>(750.6 to 914.7)       | 762.1<br>(653.8 to 887.0)       |
| Egypt                          | 1,847.1<br>(1,847.1 to 1,986.9) | 1,085.2<br>(1,658.6 to 1,785.7) | 1,032.6<br>(1,437.2 to 1,555.2) | 976.5<br>(1,438.7 to 1,552.3)   | 1,048.6<br>(1,199.6 to 1,296.1) | 955.8<br>(1,090.5 to 1,175.8)   | 925.0<br>(972.5 to 1,053.0)     | 912.6<br>(978.7 to 1,061.0)     | 933.9<br>(990.2 to 1,076.3)     | 933.9<br>(854.1 to 1,036.5)     |
| Iran                           | 1,248.7<br>(1,248.7 to 1,565.6) | 1,085.2<br>(976.8 to 1,201.1)   | 1,032.6<br>(927.4 to 1,142.5)   | 976.5<br>(870.7 to 1,089.4)     | 1,048.6<br>(929.2 to 1,166.5)   | 955.8<br>(876.4 to 1,040.7)     | 925.0<br>(866.9 to 1,025.1)     | 912.6<br>(827.1 to 1,064.6)     | 933.9<br>(719.7 to 950.7)       | 933.9<br>(646.7 to 847.9)       |
| Iraq                           | 1,392.1<br>(1,349.9 to 1,498.0) | 1,270.5<br>(1,339.9 to 1,535.7) | 1,213.2<br>(1,273.9 to 1,544.2) | 1,094.2<br>(1,283.9 to 1,481.0) | 943.8<br>(1,172.2 to 1,434.7)   | 900.3<br>(1,244.1 to 1,496.0)   | 890.3<br>(1,238.5 to 1,467.7)   | 912.6<br>(1,242.1 to 1,526.1)   | 933.9<br>(1,018.7 to 1,418.2)   | 933.9<br>(1,018.7 to 1,418.2)   |
| Israel                         | 1,099.9<br>(997.6 to 1,208.6)   | 1,069.5<br>(991.6 to 1,161.1)   | 984.0<br>(896.4 to 1,075.4)     | 889.5<br>(814.3 to 973.1)       | 759.4<br>(672.2 to 852.4)       | 761.0<br>(689.0 to 839.1)       | 743.3<br>(673.1 to 813.6)       | 698.3<br>(632.0 to 777.7)       | 636.5<br>(577.5 to 703.8)       | 560.4<br>(445.8 to 686.7)       |
| Kuwait                         | 1,858.8<br>(1,017.2 to 1,386.1) | 1,858.8<br>(1,142.4 to 1,903.9) | 1,858.8<br>(1,299.0 to 2,541.5) | 1,858.8<br>(1,063.6 to 1,561.2) | 1,858.8<br>(950.9 to 1,195.3)   | 1,858.8<br>(785.3 to 917.1)     | 1,858.8<br>(650.2 to 779.5)     | 1,858.8<br>(572.6 to 674.8)     | 1,858.8<br>(510.3 to 597.2)     | 1,858.8<br>(488.9 to 599.9)     |
| Lebanon                        | 1,085.0<br>(980.4 to 1,138.1)   | 855.3<br>(891.8 to 1,024.0)     | 880.0<br>(823.1 to 948.4)       | 880.0<br>(795.2 to 912.0)       | 880.0<br>(791.5 to 862.6)       | 880.0<br>(754.0 to 860.6)       | 880.0<br>(744.2 to 862.3)       | 880.0<br>(711.8 to 834.0)       | 880.0<br>(675.8 to 802.5)       | 880.0<br>(710.7 to 851.9)       |
| Libya                          | 1,648.5<br>(1,588.0 to 1,714.7) | 1,538.2<br>(1,478.2 to 1,593.2) | 1,401.5<br>(1,349.2 to 1,455.2) | 1,229.3<br>(1,178.9 to 1,278.9) | 1,128.1<br>(1,083.8 to 1,179.2) | 1,052.3<br>(1,010.1 to 1,07.4)  | 960.3<br>(915.0 to 1,009.3)     | 899.8<br>(855.0 to 949.6)       | 838.9<br>(788.0 to 888.5)       | 773.0<br>(728.1 to 827.1)       |
| Morocco                        | 1,362.2<br>(1,362.2 to 1,362.2) | 1,150.1<br>(1,013.6 to 1,301.3) | 1,060.2<br>(923.2 to 1,175.5)   | 1,034.3<br>(932.2 to 1,145.6)   | 1,038.2<br>(958.8 to 1,111.0)   | 1,038.2<br>(958.8 to 1,111.0)   | 1,038.2<br>(958.8 to 1,111.0)   | 1,038.2<br>(958.8 to 1,111.0)   | 1,038.2<br>(958.8 to 1,111.0)   | 1,038.2<br>(958.8 to 1,111.0)   |
| Palestine                      | 1,736.8<br>(1,623.4 to 1,849.5) | 1,494.2<br>(1,401.5 to 1,585.8) | 1,252.2<br>(1,178.9 to 1,321.5) | 1,066.0<br>(1,001.0 to 1,122.4) | 964.8<br>(908.7 to 1,019.6)     | 896.7<br>(839.3 to 951.3)       | 829.9<br>(778.8 to 879.2)       | 762.0<br>(719.3 to 808.5)       | 701.2<br>(716.8 to 814.1)       | 701.2<br>(666.4 to 735.4)       |
| Oman                           | 1,092.4<br>(919.2 to 1,412.1)   | 1,092.4<br>(878.9 to 1,371.0)   | 1,092.4<br>(870.9 to 1,273.8)   | 1,092.4<br>(793.5 to 1,047.4)   | 1,092.4<br>(679.8 to 895.4)     | 1,092.4<br>(713.8 to 921.8)     | 1,092.4<br>(692.5 to 909.1)     | 1,092.4<br>(618.0 to 828.5)     | 1,092.4<br>(509.7 to 676.1)     | 1,092.4<br>(430.6 to 699.5)     |
| Qatar                          | 1,858.4<br>(961.6 to 1,161.7)   | 915.3<br>(839.4 to 990.4)       | 851.6<br>(784.9 to 916.7)       | 851.6<br>(800.6 to 928.2)       | 851.6<br>(851.8 to 975.3)       | 851.6<br>(871.8 to 984.5)       | 851.6<br>(941.9 to 1,026.4)     | 851.6<br>(911.0 to 975.2)       | 851.6<br>(834.7 to 906.7)       | 851.6<br>(687.0 to 774.9)       |
| Saudi Arabia                   | 1,860.0<br>(1,795.6 to 1,935.9) | 1,737.3<br>(1,758.3 to 1,885.9) | 1,737.3<br>(1,678.7 to 1,800.6) | 1,737.3<br>(1,745.3 to 2,276.8) | 1,737.3<br>(1,516.8 to 1,628.2) | 1,737.3<br>(1,442.1 to 1,561.7) | 1,737.3<br>(1,342.5 to 1,449.0) | 1,737.3<br>(1,223.9 to 1,324.3) | 1,737.3<br>(1,125.0 to 1,221.5) | 1,737.3<br>(1,018.6 to 1,123.7) |
| Sudan                          | 1,418.2<br>(1,418.2 to 1,263.4) | 1,073.0<br>(1,073.0 to 1,158.7) | 1,073.0<br>(1,010.5 to 1,084.8) | 1,073.0<br>(925.6 to 1,015.3)   | 1,073.0<br>(892.1 to 1,051.8)   | 1,073.0<br>(855.4 to 944.4)     | 1,073.0<br>(855.4 to 944.4)     | 1,073.0<br>(855.4 to 944.4)     | 1,073.0<br>(708.5 to 777.1)     | 1,073.0<br>(1,018.7 to 1,228.7) |
| Syria                          | 1,576.6<br>(1,506.8 to 1,650.7) | 1,370.4<br>(1,314.7 to 1,432.8) | 1,252.4<br>(1,186.9 to 1,338.5) | 1,000.4<br>(942.8 to 1,070.8)   | 930.1<br>(880.8 to 991.2)       | 909.2<br>(857.3 to 969.3)       | 774.2<br>(719.6 to 832.0)       | 722.7<br>(657.3 to 791.1)       | 685.9<br>(607.5 to 770.4)       | 668.6<br>(582.0 to 750.2)       |
| Tunisia                        | 1,456.2<br>(1,275.1 to 1,631.2) | 1,307.7<br>(1,197.4 to 1,432.7) | 1,125.6<br>(1,045.4 to 1,210.8) | 962.9<br>(901.2 to 1,032.6)     | 890.5<br>(852.0 to 927.9)       | 803.0<br>(867.3 to 938.9)       | 763.3<br>(731.9 to 792.7)       | 652.7<br>(621.9 to 683.7)       | 589.8<br>(548.1 to 630.8)       | 559.7<br>(483.4 to 640.3)       |
| Turkey                         | 1,126.0<br>(952.4 to 1,307.6)   | 1,021.3<br>(863.3 to 1,224.3)   | 912.3<br>(789.5 to 1,127.3)     | 828.9<br>(779.3 to 1,070.5)     | 1,602.0<br>(809.5 to 1,103.5)   | 1,602.0<br>(802.6 to 1,027.2)   | 1,602.0<br>(770.9 to 928.7)     | 1,602.0<br>(714.8 to 802.7)     | 1,602.0<br>(701.6 to 848.2)     | 1,602.0<br>(681.1 to 904.4)     |
| United Arab Emirates           | 2,452.9<br>(2,452.9 to 2,299.4) | 2,052.1<br>(1,932.6 to 2,191.4) | 1,828.9<br>(1,709.0 to 1,957.9) | 1,681.0<br>(1,567.5 to 1,804.3) | 1,602.0<br>(1,484.2 to 1,722.7) | 1,602.0<br>(1,423.4 to 1,646.6) | 1,602.0<br>(1,332.6 to 1,530.5) | 1,602.0<br>(1,225.1 to 1,401.1) | 1,602.0<br>(1,103.1 to 1,275.2) | 1,602.0<br>(1,120.8 to 1,322.8) |
| Yemen                          | 2,229.1<br>(2,162.5 to 2,297.0) | 2,229.1<br>(1,990.3 to 2,076.2) | 2,229.1<br>(1,824.0 to 1,896.3) | 2,229.1<br>(1,704.3 to 1,765.8) | 2,229.1<br>(1,588.1 to 1,648.6) | 2,229.1<br>(1,495.2 to 1,549.8) | 2,229.1<br>(1,401.4 to 1,452.9) | 2,229.1<br>(1,299.3 to 1,350.0) | 2,229.1<br>(1,203.6 to 1,253.6) | 2,229.1<br>(1,090.1 to 1,142.9) |
| South Asia                     | 2,217.9<br>(2,217.9 to 2,217.9) | 2,034.1<br>(1,990.3 to 2,076.2) | 1,859.6<br>(1,824.0 to          |                                 |                                 |                                 |                                 |                                 |                                 |                                 |

Appendix Table 19A. Age-standardized mortality rates, both sexes combined, 1970, 1975, 1980, 1985, 1990, 1995, 2000, 2005, 2010, 2016

| Location                         | 1970                                       | 1975                            | 1980                            | 1985                            | 1990                            | 1995                            | 2000                            | 2005                            | 2010                            | 2016                            |
|----------------------------------|--------------------------------------------|---------------------------------|---------------------------------|---------------------------------|---------------------------------|---------------------------------|---------------------------------|---------------------------------|---------------------------------|---------------------------------|
| Niger                            | 2,247.2<br>(2,092.5 to 2,415.7)            | 2,287.3<br>(2,163.5 to 2,430.5) | 2,269.3<br>(2,160.8 to 2,399.6) | 2,224.4<br>(2,118.1 to 2,342.2) | 2,019.5<br>(1,930.5 to 2,114.4) | 1,927.2<br>(1,834.3 to 2,027.7) | 1,776.3<br>(1,692.8 to 1,863.7) | 1,635.4<br>(1,547.9 to 1,738.2) | 1,510.4<br>(1,401.5 to 1,632.8) | 1,401.1<br>(1,265.2 to 1,554.2) |
| Nigeria                          | 1,686.9 to 1,975.9<br>(1,522.8 to 1,887.1) | 1,682.8<br>(1,557.6 to 1,823.2) | 1,576.6<br>(1,463.8 to 1,692.4) | 1,285.4<br>(1,209.0 to 1,359.1) | 1,296.3<br>(1,212.9 to 1,383.7) | 1,292.3<br>(1,218.5 to 1,421.9) | 1,319.9<br>(1,272.6 to 1,412.5) | 1,343.0<br>(1,297.4 to 1,388.3) | 1,115.1<br>(1,048.1 to 1,188.9) | 1,033.4<br>(928.8 to 1,151.2)   |
| Sao Tome and Principe            | 2,087.3<br>(2,004.8 to 2,171.2)            | 2,021.4<br>(1,940.8 to 2,114.8) | 1,878.3<br>(1,803.9 to 1,964.3) | 1,703.7<br>(1,632.9 to 1,786.0) | 1,626.6<br>(1,554.8 to 1,703.6) | 1,601.8<br>(1,525.8 to 1,672.6) | 1,561.0<br>(1,488.2 to 1,642.1) | 1,473.2<br>(1,402.3 to 1,543.2) | 1,378.7<br>(1,323.6 to 1,429.0) | 1,272.5<br>(1,214.2 to 1,340.3) |
| Senegal                          | 2,140.6<br>(2,003.0 to 2,311.4)            | 2,046.9<br>(1,921.4 to 2,189.7) | 1,999.5<br>(1,887.0 to 2,117.1) | 1,947.6<br>(1,851.5 to 2,049.0) | 1,882.7<br>(1,791.8 to 1,967.8) | 1,951.1<br>(1,865.5 to 2,046.3) | 1,945.3<br>(1,858.8 to 2,041.7) | 1,923.3<br>(1,824.7 to 2,018.3) | 1,803.6<br>(1,697.0 to 1,914.1) | 1,589.7<br>(1,475.5 to 1,695.8) |
| Sierra Leone                     | 1,848.5<br>(1,748.4 to 1,956.8)            | 1,746.2<br>(1,653.4 to 1,844.7) | 1,663.3<br>(1,576.1 to 1,750.9) | 1,656.2<br>(1,575.5 to 1,740.3) | 1,638.9<br>(1,555.6 to 1,725.6) | 1,671.0<br>(1,570.3 to 1,764.0) | 1,646.4<br>(1,593.2 to 1,892.3) | 1,753.0<br>(1,600.9 to 1,907.4) | 1,635.5<br>(1,511.1 to 1,765.5) | 1,444.4<br>(1,337.5 to 1,567.0) |
| Togo                             | 2,270.0<br>(2,187.8 to 2,353.8)            | 2,195.4<br>(2,119.1 to 2,272.0) | 2,124.7<br>(2,055.7 to 2,194.8) | 2,121.2<br>(2,063.4 to 2,179.9) | 2,130.0<br>(2,076.5 to 2,178.0) | 2,177.0<br>(2,118.5 to 2,233.2) | 2,158.5<br>(2,098.9 to 2,214.4) | 1,927.0<br>(1,875.4 to 1,982.1) | 1,651.0<br>(1,598.7 to 1,706.7) | 1,411.1<br>(1,352.9 to 1,469.9) |
| Eastern Sub-Saharan Africa       | 2,638.4<br>(2,519.6 to 2,869.5)            | 2,662.9<br>(2,473.1 to 2,845.9) | 2,638.3<br>(2,426.1 to 2,836.8) | 2,645.4<br>(2,425.9 to 2,873.8) | 2,618.5<br>(2,403.6 to 2,867.7) | 2,720.1<br>(2,507.4 to 2,942.3) | 2,710.9<br>(2,405.1 to 2,989.1) | 2,716.5<br>(1,989.2 to 2,907.9) | 2,136.5<br>(1,659.4 to 1,961.2) | 1,651.3<br>(1,485.4 to 1,829.1) |
| Burundi                          | 2,050.8<br>(1,866.4 to 2,241.3)            | 1,936.3<br>(1,758.4 to 2,106.9) | 1,858.2<br>(1,689.5 to 2,018.6) | 1,763.3<br>(1,606.0 to 1,903.4) | 1,659.2<br>(1,521.1 to 1,773.8) | 1,596.0<br>(1,487.1 to 1,688.1) | 1,501.2<br>(1,398.1 to 1,586.8) | 1,323.5<br>(1,228.0 to 1,410.0) | 1,249.9<br>(1,126.0 to 1,331.6) | 1,173.3<br>(1,061.7 to 1,269.4) |
| Comoros                          | 1,452.2<br>(1,365.0 to 1,547.8)            | 1,401.7<br>(1,321.7 to 1,491.3) | 1,403.2<br>(1,319.6 to 1,495.2) | 1,411.2<br>(1,338.4 to 1,496.8) | 1,407.0<br>(1,350.9 to 1,470.9) | 1,412.7<br>(1,336.1 to 1,490.1) | 1,423.5<br>(1,275.4 to 1,555.2) | 1,410.7<br>(1,253.0 to 1,599.2) | 1,336.9<br>(1,177.4 to 1,513.4) | 1,193.1<br>(1,021.3 to 1,353.0) |
| Djibouti                         | 2,706.5<br>(2,537.3 to 2,876.1)            | 2,597.4<br>(2,456.1 to 2,748.4) | 2,506.4<br>(2,381.4 to 2,635.1) | 2,423.5<br>(2,296.2 to 2,546.7) | 2,223.7<br>(2,101.7 to 2,350.4) | 2,223.7<br>(1,784.1 to 2,028.1) | 1,901.8<br>(1,661.7 to 1,900.8) | 1,655.7<br>(1,533.7 to 1,788.6) | 1,601.9<br>(1,472.8 to 1,733.1) | 1,495.1<br>(1,369.7 to 1,624.7) |
| Eritrea                          | 2,867.6<br>(2,629.4 to 3,126.4)            | 2,895.2<br>(2,663.3 to 3,134.7) | 2,827.9<br>(2,599.0 to 3,071.1) | 2,755.2<br>(2,584.7 to 2,927.7) | 2,646.4<br>(2,510.5 to 2,773.3) | 2,646.4<br>(2,256.0 to 2,497.6) | 2,246.6<br>(2,123.0 to 2,364.0) | 1,901.3<br>(1,790.7 to 2,025.6) | 1,568.1<br>(1,445.9 to 1,715.7) | 1,346.7<br>(1,200.7 to 1,506.8) |
| Ethiopia                         | 1,618.8<br>(1,571.7 to 1,658.0)            | 1,512.6<br>(1,468.0 to 1,555.4) | 1,416.9<br>(1,379.5 to 1,458.1) | 1,374.3<br>(1,338.7 to 1,415.4) | 1,450.0<br>(1,404.7 to 1,498.1) | 1,450.0<br>(1,636.7 to 1,765.7) | 1,851.9<br>(1,795.3 to 1,913.8) | 1,715.5<br>(1,669.9 to 1,763.8) | 1,541.8<br>(1,354.6 to 1,439.0) | 1,183.1<br>(1,141.9 to 1,224.9) |
| Kenya                            | 2,256.0<br>(2,136.1 to 2,399.3)            | 2,011.9<br>(1,897.1 to 2,139.9) | 1,811.7<br>(1,696.1 to 1,929.3) | 1,861.9<br>(1,760.9 to 1,966.1) | 1,816.6<br>(1,730.2 to 1,899.3) | 1,754.0<br>(1,670.4 to 1,838.3) | 1,680.2<br>(1,589.0 to 1,778.3) | 1,592.3<br>(1,480.5 to 1,702.6) | 1,541.8<br>(1,377.3 to 1,687.0) | 1,449.1<br>(1,258.8 to 1,653.2) |
| Madagascar                       | 2,261.3<br>(2,123.9 to 2,411.1)            | 2,096.8<br>(1,979.8 to 2,220.7) | 1,936.3<br>(1,837.6 to 2,039.5) | 1,915.0<br>(1,808.8 to 2,050.1) | 2,059.3<br>(1,808.8 to 2,319.1) | 2,424.2<br>(2,047.8 to 2,793.1) | 2,660.2<br>(2,218.8 to 3,040.9) | 2,443.8<br>(2,096.9 to 2,804.1) | 1,983.9<br>(1,742.2 to 2,200.6) | 1,550.5<br>(1,348.6 to 1,757.6) |
| Malawi                           | 2,143.3<br>(2,015.3 to 2,284.7)            | 2,020.8<br>(1,910.9 to 2,136.3) | 1,976.9<br>(1,887.3 to 2,081.2) | 2,333.6<br>(2,144.2 to 2,554.1) | 1,965.0<br>(1,809.8 to 2,052.6) | 1,948.6<br>(1,806.2 to 2,085.9) | 1,990.1<br>(1,773.4 to 2,218.9) | 1,934.2<br>(1,708.3 to 2,205.1) | 1,817.2<br>(1,623.4 to 2,032.8) | 1,506.1<br>(1,354.6 to 1,702.1) |
| Mozambique                       | 2,357.5<br>(2,158.7 to 2,579.9)            | 2,290.6<br>(2,107.1 to 2,501.8) | 2,153.8<br>(1,977.4 to 2,324.8) | 2,060.6<br>(1,920.3 to 2,198.4) | 2,393.7<br>(2,221.8 to 2,568.0) | 2,843.4<br>(2,664.1 to 3,039.5) | 2,330.5<br>(2,169.1 to 2,487.3) | 1,646.0<br>(1,527.9 to 1,773.5) | 1,446.0<br>(1,171.7 to 1,381.1) | 1,140.8<br>(1,028.3 to 1,260.0) |
| Rwanda                           | 2,217.4<br>(2,055.5 to 2,483.9)            | 2,180.4<br>(2,179.7 to 2,624.1) | 2,180.8<br>(2,006.5 to 2,395.4) | 2,217.4<br>(2,045.0 to 2,430.7) | 2,215.8<br>(2,033.9 to 2,416.9) | 2,203.7<br>(2,013.6 to 2,400.2) | 2,192.9<br>(2,003.8 to 2,389.1) | 2,092.4<br>(1,903.9 to 2,314.1) | 1,896.4<br>(1,936.9 to 2,372.0) | 1,529.5<br>(1,720.2 to 2,333.0) |
| Somalia                          | 1,975.3<br>(1,747.7 to 2,239.0)            | 1,904.7<br>(1,706.3 to 2,146.2) | 1,858.6<br>(1,670.4 to 2,060.9) | 1,868.5<br>(1,685.0 to 2,062.5) | 1,910.9<br>(1,692.7 to 2,126.8) | 1,877.0<br>(1,626.8 to 2,115.7) | 1,854.4<br>(1,576.5 to 2,116.2) | 1,801.8<br>(1,524.9 to 2,054.7) | 1,659.5<br>(1,402.3 to 1,919.6) | 1,499.1<br>(1,358.8 to 1,831.7) |
| South Sudan                      | 1,852.7<br>(1,754.1 to 1,966.9)            | 1,739.0<br>(1,641.5 to 1,841.1) | 1,649.4<br>(1,561.3 to 1,749.9) | 1,634.6<br>(1,547.4 to 1,734.9) | 1,796.0<br>(1,670.6 to 1,915.2) | 1,971.0<br>(1,768.5 to 2,135.7) | 2,006.2<br>(1,776.9 to 2,173.8) | 1,845.1<br>(1,647.5 to 1,992.1) | 1,604.4<br>(1,442.2 to 1,728.7) | 1,341.3<br>(1,198.3 to 1,475.3) |
| Tanzania                         | 2,161.4<br>(2,036.9 to 2,280.5)            | 2,091.3<br>(1,968.9 to 2,200.4) | 2,208.3<br>(2,061.6 to 2,364.2) | 2,178.3<br>(2,050.6 to 2,319.8) | 2,297.0<br>(2,111.7 to 2,515.7) | 2,297.0<br>(2,260.2 to 2,792.7) | 2,141.1<br>(2,246.3 to 2,577.3) | 2,091.7<br>(1,970.6 to 2,230.2) | 1,792.0<br>(1,649.9 to 1,910.9) | 1,480.4<br>(1,334.8 to 1,617.5) |
| Uganda                           | 1,639.9<br>(1,373.6 to 1,957.0)            | 1,543.7<br>(1,316.6 to 1,802.7) | 1,529.7<br>(1,355.9 to 1,727.8) | 1,529.7<br>(1,405.7 to 1,794.4) | 1,921.5<br>(1,721.2 to 2,117.0) | 2,584.0<br>(2,320.9 to 2,867.9) | 3,007.1<br>(2,683.2 to 3,322.8) | 2,914.7<br>(2,581.2 to 3,182.0) | 2,306.1<br>(2,062.9 to 2,566.7) | 1,788.6<br>(1,499.6 to 2,078.2) |
| Zambia                           | 2,162.5<br>(2,031.7 to 2,296.3)            | 2,085.3<br>(1,961.4 to 2,203.5) | 2,043.0<br>(1,949.8 to 2,137.8) | 2,043.0<br>(1,904.9 to 2,083.4) | 2,019.7<br>(1,934.9 to 2,104.0) | 2,058.7<br>(1,972.4 to 2,143.0) | 2,048.1<br>(1,962.1 to 2,134.0) | 1,916.9<br>(1,837.0 to 2,000.4) | 1,764.2<br>(1,686.2 to 1,839.0) | 1,529.5<br>(1,450.4 to 1,611.0) |
| Central Sub-Saharan Africa       | 2,226.4<br>(1,899.5 to 2,578.9)            | 2,167.1<br>(1,891.1 to 2,495.4) | 2,160.9<br>(1,868.5 to 2,472.7) | 2,180.1<br>(1,872.5 to 2,494.4) | 2,204.6<br>(1,875.5 to 2,539.3) | 2,143.0<br>(1,803.7 to 2,503.9) | 2,033.0<br>(1,719.1 to 2,363.6) | 1,837.3<br>(1,546.1 to 2,160.7) | 1,605.0<br>(1,329.9 to 1,918.2) | 1,362.9<br>(1,122.3 to 1,692.5) |
| Angola                           | 2,515.2<br>(2,258.8 to 2,779.0)            | 2,479.8<br>(2,251.1 to 2,709.2) | 2,381.8<br>(2,201.6 to 2,569.0) | 2,350.4<br>(2,193.4 to 2,508.6) | 2,553.5<br>(2,382.2 to 2,723.2) | 2,764.2<br>(2,484.6 to 3,049.3) | 2,932.7<br>(2,586.9 to 3,287.0) | 2,889.2<br>(2,542.8 to 3,229.5) | 2,633.1<br>(2,315.8 to 2,986.4) | 2,470.7<br>(2,119.8 to 2,766.8) |
| Central African Republic         | 2,534.7<br>(2,249.0 to 2,860.7)            | 2,394.0<br>(2,105.8 to 2,707.4) | 2,279.4<br>(2,026.2 to 2,569.8) | 2,168.2<br>(1,936.4 to 2,407.0) | 2,266.7<br>(2,070.6 to 2,450.8) | 2,356.2<br>(2,160.7 to 2,527.8) | 2,255.6<br>(2,079.7 to 2,424.6) | 1,913.1<br>(1,733.5 to 2,058.5) | 1,654.2<br>(1,494.1 to 1,817.5) | 1,490.6<br>(1,283.2 to 1,705.4) |
| Congo                            | 2,053.3<br>(1,901.8 to 2,210.4)            | 1,981.9<br>(1,855.7 to 2,126.6) | 1,951.2<br>(1,836.7 to 2,065.9) | 1,883.4<br>(1,790.2 to 1,978.2) | 1,888.2<br>(1,795.4 to 1,982.8) | 1,951.1<br>(1,861.1 to 2,039.5) | 1,967.9<br>(1,876.6 to 2,061.2) | 1,871.7<br>(1,789.1 to 1,952.9) | 1,763.7<br>(1,683.4 to 1,849.3) | 1,525.6<br>(1,439.2 to 1,608.5) |
| Democratic Republic of the Congo | 2,711.7<br>(2,376.5 to 3,127.2)            | 2,651.2<br>(2,273.7 to 2,989.2) | 2,460.5<br>(2,127.6 to 2,799.5) | 2,400.7<br>(2,048.9 to 2,728.9) | 2,482.7<br>(2,129.8 to 2,821.6) | 2,432.1<br>(2,098.1 to 2,773.9) | 2,379.9<br>(1,516.3 to 2,232.8) | 1,877.9<br>(1,199.4 to 1,979.7) | 1,575.4<br>(1,094.7 to 1,778.2) | 1,186.0<br>(886.1 to 1,534.5)   |
| Equatorial Guinea                | 2,092.0<br>(1,834.1 to 2,378.0)            | 1,910.5<br>(1,649.3 to 2,160.3) | 1,764.7<br>(1,559.7 to 1,969.9) | 1,714.0<br>(1,539.8 to 1,875.0) | 1,740.0<br>(1,599.8 to 1,865.4) | 1,732.8<br>(1,592.0 to 1,863.3) | 1,761.7<br>(1,609.8 to 1,931.4) | 1,676.7<br>(1,548.8 to 1,843.1) | 1,456.6<br>(1,324.6 to 1,610.1) | 1,235.7<br>(1,085.0 to 1,408.0) |
| Gabon                            |                                            |                                 |                                 |                                 |                                 |                                 |                                 |                                 |                                 |                                 |

Appendix Table 19B. Age-standardized mortality rates, males, 1970, 1975, 1980, 1985, 1990, 1995, 2000, 2005, 2010, 2016

| Location                  | 1970                           | 1975                           | 1980                           | 1985                           | 1990                           | 1995                           | 2000                           | 2005                           | 2010                           | 2016                           |
|---------------------------|--------------------------------|--------------------------------|--------------------------------|--------------------------------|--------------------------------|--------------------------------|--------------------------------|--------------------------------|--------------------------------|--------------------------------|
| Global                    | 1724.7<br>(1,698.5 to 1,751.8) | 1425.9<br>(1,400.1 to 1,447.7) | 1546.7<br>(1,530.5 to 1,563.9) | 1469.8<br>(1,455.5 to 1,484.5) | 1407.5<br>(1,394.7 to 1,421.3) | 1382.6<br>(1,368.9 to 1,395.9) | 1308.3<br>(1,296.5 to 1,321.5) | 1212.8<br>(1,199.8 to 1,225.6) | 1103.2<br>(1,089.8 to 1,116.4) | 1102.4<br>(1,088.1 to 1,120.8) |
| High SDI                  | 1212.4<br>(1,206.3 to 1,239.6) | 1243.4<br>(1,221.6 to 1,247.7) | 1312.6<br>(1,312.0 to 1,313.2) | 1066.6<br>(1,060.5 to 1,072.0) | 989.4<br>(981.3 to 996.8)      | 926.6<br>(920.0 to 934.0)      | 851.2<br>(842.6 to 859.4)      | 781.2<br>(776.6 to 839.6)      | 683.4<br>(675.4 to 683.7)      | 654.0<br>(645.4 to 663.7)      |
| High-middle SDI           | 1478.0<br>(1,478.0 to 1,514.3) | 1416.2<br>(1,379.9 to 1,452.4) | 1416.9<br>(1,380.9 to 1,456.3) | 1340.7<br>(1,310.9 to 1,373.2) | 1300.3<br>(1,267.3 to 1,333.3) | 1380.1<br>(1,338.9 to 1,419.4) | 1276.2<br>(1,211.4 to 1,331.9) | 1178.5<br>(1,118.4 to 1,213.2) | 1008.6<br>(960.4 to 1,048.0)   | 898.6<br>(840.5 to 1,016.0)    |
| Middle SDI                | 2174.8<br>(1,652.8 to 2,728.2) | 1582.6<br>(1,555.8 to 1,612.1) | 1582.6<br>(1,515.3 to 1,566.5) | 1429.1<br>(1,445.2 to 1,494.7) | 1407.5<br>(1,403.4 to 1,452.6) | 1382.6<br>(1,343.4 to 1,386.2) | 1308.3<br>(1,274.9 to 1,331.7) | 1212.8<br>(1,183.2 to 1,218.4) | 1103.2<br>(1,089.4 to 1,122.3) | 1102.4<br>(991.5 to 1,034.1)   |
| Low-middle SDI            | 1724.7<br>(2,093.6 to 2,224.4) | 1425.9<br>(1,934.5 to 2,055.0) | 1546.7<br>(1,781.0 to 1,861.1) | 1469.8<br>(1,689.1 to 1,762.1) | 1407.5<br>(1,615.3 to 1,641.9) | 1382.6<br>(1,576.9 to 1,495.9) | 1308.3<br>(1,522.4 to 1,591.1) | 1212.8<br>(1,316.4 to 1,495.9) | 1103.2<br>(1,139.4 to 1,395.6) | 1102.4<br>(1,219.8 to 1,365.6) |
| Low SDI                   | 2208.0<br>(2,208.0 to 2,278.9) | 2216.7<br>(2,139.8 to 2,290.2) | 2148.5<br>(2,080.9 to 2,216.1) | 2104.6<br>(2,037.9 to 2,172.0) | 2054.9<br>(2,000.8 to 2,110.8) | 2041.7<br>(1,988.2 to 2,094.3) | 1995.3<br>(1,942.2 to 2,045.1) | 1840.0<br>(1,789.1 to 1,889.7) | 1726.9<br>(1,629.2 to 1,797.7) | 1726.9<br>(1,437.1 to 1,553.8) |
| High-income               | 1287.6<br>(1,295.1 to 1,238.0) | 1185.1<br>(1,214.9 to 1,240.7) | 1080.2<br>(1,112.3 to 1,130.7) | 1021.5<br>(1,037.6 to 1,054.2) | 962.0<br>(957.0 to 972.6)      | 921.9<br>(896.3 to 910.2)      | 838.5<br>(810.6 to 822.5)      | 780.9<br>(730.9 to 741.4)      | 693.9<br>(660.2 to 670.1)      | 607.0<br>(614.2 to 637.6)      |
| High-income North America | 1184.4<br>(1,199.9 to 1,178.9) | 1110.6<br>(1,081.4 to 1,139.0) | 1049.9<br>(980.1 to 1,030.7)   | 934.2<br>(908.3 to 958.3)      | 870.6<br>(848.6 to 892.5)      | 827.5<br>(807.2 to 847.1)      | 738.7<br>(722.2 to 758.3)      | 665.9<br>(646.9 to 678.5)      | 589.0<br>(573.7 to 605.4)      | 554.0<br>(531.8 to 576.9)      |
| Canada                    | 2089.1<br>(1,938.6 to 2,230.3) | 2213.5<br>(2,086.1 to 2,356.7) | 2488.8<br>(2,276.9 to 2,559.6) | 2466.3<br>(2,339.1 to 2,604.3) | 2466.6<br>(2,296.2 to 2,635.9) | 2185.7<br>(2,055.4 to 2,329.0) | 2074.6<br>(1,942.1 to 2,203.8) | 1984.1<br>(1,769.7 to 2,015.9) | 1822.9<br>(1,397.8 to 1,656.9) | 1622.9<br>(1,165.6 to 1,746.0) |
| Greenland                 | 1301.4<br>(1,290.0 to 1,312.4) | 1192.5<br>(1,182.6 to 1,202.7) | 1087.8<br>(1,077.9 to 1,097.7) | 972.2<br>(1,021.7 to 1,040.3)  | 922.5<br>(963.9 to 900.7)      | 912.5<br>(925.3 to 941.1)      | 849.3<br>(842.0 to 855.9)      | 782.2<br>(775.7 to 788.4)      | 706.2<br>(700.8 to 711.8)      | 696.1<br>(681.7 to 710.5)      |
| United States             | 1316.4<br>(1,316.4 to 1,366.1) | 1261.1<br>(1,215.3 to 1,260.0) | 1199.9<br>(1,088.9 to 1,218.1) | 1024.1<br>(1,006.6 to 1,045.6) | 911.0<br>(893.9 to 929.2)      | 824.7<br>(809.3 to 838.4)      | 719.7<br>(705.7 to 733.4)      | 625.5<br>(613.3 to 637.0)      | 568.2<br>(550.3 to 578.2)      | 538.4<br>(504.8 to 571.2)      |
| Australia                 | 1351.1<br>(1,321.9 to 1,380.4) | 1231.8<br>(1,207.9 to 1,260.1) | 1092.9<br>(1,066.4 to 1,115.0) | 1007.1<br>(987.1 to 1,023.4)   | 901.1<br>(881.7 to 921.1)      | 813.9<br>(797.8 to 830.5)      | 710.1<br>(693.8 to 726.1)      | 617.8<br>(603.4 to 633.8)      | 525.8<br>(509.7 to 555.2)      | 490.0<br>(489.4 to 549.9)      |
| New Zealand               | 1291.9<br>(1,289.7 to 1,330.9) | 1206.9<br>(1,221.5 to 1,286.4) | 1149.6<br>(1,150.2 to 1,172.7) | 1029.6<br>(1,078.2 to 1,134.2) | 929.6<br>(936.0 to 988.3)      | 851.3<br>(855.3 to 904.5)      | 791.6<br>(749.6 to 791.6)      | 683.9<br>(649.8 to 683.9)      | 583.2<br>(583.2 to 612.5)      | 508.1<br>(508.1 to 638.1)      |
| High-income Asia Pacific  | 1201.9<br>(1,152.7 to 1,404.4) | 1062.4<br>(1,045.8 to 1,290.8) | 1029.6<br>(957.1 to 1,335.9)   | 929.6<br>(1,037.0 to 1,181.6)  | 851.3<br>(974.4 to 1,073.3)    | 791.6<br>(906.6 to 1,024.6)    | 710.1<br>(847.8 to 935.7)      | 617.8<br>(797.8 to 886.6)      | 525.8<br>(791.7 to 880.1)      | 490.0<br>(891.4 to 955.0)      |
| Brunei                    | 1201.9<br>(1,152.7 to 1,404.4) | 1062.4<br>(1,045.8 to 1,290.8) | 1029.6<br>(957.1 to 1,335.9)   | 929.6<br>(1,037.0 to 1,181.6)  | 851.3<br>(974.4 to 1,073.3)    | 791.6<br>(906.6 to 1,024.6)    | 710.1<br>(847.8 to 935.7)      | 617.8<br>(797.8 to 886.6)      | 525.8<br>(791.7 to 880.1)      | 490.0<br>(891.4 to 955.0)      |
| Japan                     | 1643.2<br>(1,226.8 to 1,409.1) | 1309.5<br>(1,078.0 to 1,126.2) | 1092.9<br>(963.5 to 971.2)     | 1024.1<br>(863.9 to 870.7)     | 911.0<br>(753.3 to 801.5)      | 824.7<br>(749.6 to 760.4)      | 719.7<br>(681.7 to 687.4)      | 625.5<br>(615.4 to 621.4)      | 568.2<br>(579.0 to 571.2)      | 538.4<br>(504.8 to 571.2)      |
| Singapore                 | 2089.1<br>(1,471.3 to 1,842.9) | 2213.5<br>(1,360.1 to 1,688.4) | 2488.8<br>(1,380.1 to 1,684.2) | 2466.3<br>(801.3 to 1,366.8)   | 2466.6<br>(875.4 to 1,366.8)   | 2185.7<br>(738.4 to 1,366.8)   | 2074.6<br>(611.7 to 1,366.8)   | 1984.1<br>(451.7 to 1,366.8)   | 1822.9<br>(390.2 to 1,366.8)   | 1622.9<br>(201.8 to 1,366.8)   |
| South Korea               | 1184.4<br>(1,459.9 to 2,484.4) | 1110.6<br>(1,627.3 to 2,423.4) | 1049.9<br>(1,602.8 to 1,988.8) | 934.2<br>(1,432.6 to 1,761.1)  | 870.6<br>(1,239.2 to 1,525.8)  | 827.5<br>(1,044.0 to 1,307.2)  | 738.7<br>(924.4 to 1,130.7)    | 665.9<br>(746.9 to 919.3)      | 589.0<br>(644.2 to 799.9)      | 554.0<br>(481.2 to 867.5)      |
| Western Europe            | 1287.6<br>(967.3 to 1,303.5)   | 1185.1<br>(903.3 to 1,297.6)   | 1080.2<br>(1,128.1 to 1,156.2) | 1021.5<br>(1,054.3 to 1,079.2) | 962.0<br>(965.3 to 990.0)      | 921.9<br>(894.2 to 916.9)      | 838.5<br>(805.2 to 824.9)      | 780.9<br>(715.9 to 733.1)      | 693.9<br>(639.5 to 656.5)      | 607.0<br>(582.8 to 642.6)      |
| Andorra                   | 982.3<br>(746.5 to 1,207.6)    | 903.3<br>(661.6 to 1,091.8)    | 816.5<br>(645.4 to 1,020.6)    | 765.3<br>(620.1 to 911.4)      | 710.3<br>(624.2 to 886.9)      | 618.8<br>(547.8 to 842.9)      | 518.8<br>(478.3 to 693.6)      | 431.4<br>(328.1 to 603.6)      | 362.4<br>(271.3 to 611.3)      | 324.4<br>(47.1 to 604.0)       |
| Austria                   | 1453.8<br>(1,425.1 to 1,485.9) | 1378.3<br>(1,349.1 to 1,408.4) | 1286.4<br>(1,254.1 to 1,313.5) | 1206.9<br>(1,147.3 to 1,199.8) | 1129.5<br>(1,020.2 to 1,064.0) | 1045.5<br>(823.9 to 975.6)     | 940.9<br>(823.9 to 858.0)      | 849.9<br>(655.2 to 638.2)      | 771.3<br>(566.3 to 638.2)      | 685.1<br>(566.3 to 638.2)      |
| Belgium                   | 1374.5<br>(1,371.0 to 1,350.9) | 1313.3<br>(1,261.4 to 1,360.3) | 1229.1<br>(1,185.4 to 1,271.4) | 1136.0<br>(1,098.9 to 1,178.8) | 1013.3<br>(974.1 to 1,053.8)   | 949.8<br>(916.4 to 985.0)      | 875.3<br>(842.4 to 910.9)      | 773.8<br>(742.7 to 802.2)      | 700.2<br>(672.5 to 726.6)      | 624.4<br>(612.5 to 701.9)      |
| Cyprus                    | 1292.8<br>(1,228.4 to 1,351.8) | 1272.3<br>(1,211.4 to 1,338.0) | 1154.9<br>(1,026.5 to 1,205.3) | 1086.9<br>(1,039.7 to 1,133.8) | 1029.6<br>(976.3 to 1,066.1)   | 929.6<br>(919.0 to 999.3)      | 888.2<br>(854.0 to 924.9)      | 809.3<br>(776.8 to 844.2)      | 699.7<br>(665.5 to 732.7)      | 609.7<br>(623.8 to 702.3)      |
| Denmark                   | 1453.8<br>(1,045.8 to 1,181.5) | 1378.3<br>(1,018.8 to 1,151.8) | 1286.4<br>(1,005.4 to 1,165.0) | 1206.9<br>(1,026.5 to 1,120.7) | 1129.5<br>(950.1 to 1,120.7)   | 1045.5<br>(935.1 to 1,079.2)   | 940.9<br>(833.8 to 942.7)      | 849.9<br>(754.5 to 854.7)      | 771.3<br>(661.5 to 751.8)      | 685.1<br>(516.7 to 714.8)      |
| Finland                   | 1568.6<br>(1,528.8 to 1,608.1) | 1425.9<br>(1,388.9 to 1,461.7) | 1269.4<br>(1,236.0 to 1,307.1) | 1189.4<br>(1,158.5 to 1,221.0) | 1109.6<br>(1,089.3 to 1,149.8) | 1029.6<br>(958.3 to 1,013.6)   | 929.6<br>(870.9 to 919.8)      | 809.3<br>(774.6 to 821.1)      | 723.4<br>(702.0 to 744.8)      | 649.9<br>(619.9 to 664.7)      |
| France                    | 1287.6<br>(1,221.3 to 1,289.3) | 1185.1<br>(1,176.3 to 1,245.5) | 1080.2<br>(1,071.9 to 1,149.0) | 1021.5<br>(1,001.4 to 1,057.9) | 962.0<br>(897.5 to 947.7)      | 921.9<br>(840.6 to 883.8)      | 838.5<br>(769.8 to 812.9)      | 780.9<br>(684.5 to 651.1)      | 693.9<br>(516.8 to 610.6)      | 607.0<br>(508.1 to 610.6)      |
| Germany                   | 1453.8<br>(1,328.4 to 1,642.9) | 1378.3<br>(1,176.3 to 1,411.6) | 1286.4<br>(1,183.2 to 1,304.8) | 1206.9<br>(1,083.9 to 1,220.9) | 1129.5<br>(1,017.3 to 1,126.9) | 1045.5<br>(830.1 to 1,033.1)   | 940.9<br>(828.6 to 907.2)      | 849.9<br>(730.2 to 802.8)      | 771.3<br>(584.0 to 715.5)      | 685.1<br>(508.1 to 715.5)      |
| Greece                    | 982.3<br>(959.4 to 1,014.7)    | 903.3<br>(900.4 to 961.3)      | 816.5<br>(727.0 to 769.6)      | 765.3<br>(853.7 to 901.3)      | 710.3<br>(803.8 to 887.1)      | 618.8<br>(788.2 to 847.7)      | 518.8<br>(760.1 to 802.9)      | 431.4<br>(698.5 to 739.1)      | 362.4<br>(645.2 to 627.9)      | 324.4<br>(572.1 to 677.0)      |
| Iceland                   | 1003.6<br>(1,003.6 to 1,083.1) | 928.5<br>(928.5 to 994.7)      | 838.7<br>(838.7 to 913.8)      | 808.1<br>(808.1 to 878.7)      | 752.3<br>(752.3 to 823.8)      | 710.3<br>(715.4 to 787.5)      | 618.8<br>(647.6 to 710.7)      | 518.8<br>(574.3 to 630.2)      | 431.4<br>(537.1 to 588.2)      | 324.4<br>(610.3 to 627.9)      |
| Ireland                   | 1301.4<br>(1,238.0 to 1,374.8) | 1192.5<br>(1,238.9 to 1,364.8) | 1087.8<br>(1,208.0 to 1,244.9) | 972.2<br>(1,136.1 to 1,260.5)  | 922.5<br>(1,036.3 to 1,150.1)  | 912.5<br>(979.2 to 1,083.0)    | 849.3<br>(903.1 to 998.2)      | 782.2<br>(724.3 to 806.5)      | 706.2<br>(625.4 to 692.0)      | 696.1<br>(530.7 to 692.4)      |
| Israel                    | 1268.7<br>(1,226.8 to 1,345.0) | 1268.7<br>(1,026.7 to 1,252.2) | 1268.7<br>(903.3 to 1,153.1)   | 1268.7<br>(803.3 to 1,103.0)   | 1268.7<br>(822.1 to 997.1)     | 1268.7<br>(673.0 to 950.5)     | 1268.7<br>(665.0 to 828.5)     | 1268.7<br>(443.7 to 640.9)     | 1268.7<br>(525.2 to 748.4)     | 1268.7<br>(443.7 to 640.9)     |
| Italy                     | 1273.9<br>(1,208.8 to 1,265.4) | 1206.9<br>(1,189.1 to 1,235.4) | 1140.0<br>(1,113.7 to 1,166.7) | 1029.6<br>(1,003.7 to 1,051.1) | 929.6<br>(903.3 to 944.5)      | 824.7<br>(830.1 to 845.5)      | 719.7<br>(733.7 to 767.7)      | 625.5<br>(654.6 to 686.7)      | 568.2<br>(612.5 to 627.6)      | 538.4<br>(571.7 to 642.3)      |
| Luxembourg                | 1453.8<br>(1,426.4 to 1,518.6) | 1378.3<br>(1,340.3 to 1,432.5) | 1286.4<br>(1,249.8 to 1,340.2) | 1206.9<br>(1,154.1 to 1,241.6) | 1129.5<br>(1,030.3 to 1,107.5) | 1045.5<br>(924.7 to 993.1)     | 940.9<br>(805.8 to 872.6)      | 849.9<br>(685.8 to 742.9)      | 771.3<br>(588.9 to 642.6)      | 685.1<br>(496.1 to 642.6)      |
| Malta                     | 1316.4<br>(1,316.4 to 1,366.1) | 1261.1<br>(1,261.1 to 1,311.1) | 1199.9<br>(1,199.9 to 1,249.9) | 1024.1<br>(1,007.9 to 1,188.5) | 911.0<br>(863.1 to 1,026.2)    | 824.7<br>(795.6 to 951.1)      | 719.7<br>(791.0 to 941.4)      | 625.5<br>(678.1 to 800.3)      | 568.2<br>(614.6 to 731.4)      | 538.4<br>(516.7 to 714.8)      |
| Netherlands               | 1003.6<br>(1,003.6 to 1,140.6) | 928.5<br>(1,037.0 to 1,130.6)  | 838.7<br>(975.9 to 1,072.5)    | 808.1<br>(959.8 to 1,044.1)    | 752.3<br>(916.3 to 993.9)      | 710.3<br>(875.0 to 901.3)      | 618.8<br>(814.8 to 889.1)      | 518.8<br>(713.7 to 743.6)      | 431.4<br>(620.0 to 673.4)      | 324.4<br>(545.8 to 605.4)      |
| Norway                    | 1053.6<br>(1,053.6 to 1,149.3) | 1053.6<br>(1,012.0 to 1,100.0) | 1053.6<br>(972.0 to 1,058.4)   | 1053.6<br>(950.5 to 1,037.9)   | 1053.6<br>(900.2 to 980.6)     | 1053.6<br>(834.4 to 908.1)     | 1053.6<br>(769.8 to 812.9)     | 1053.6<br>(662.4 to 726.6)     | 1053.6<br>(508.1 to 627.3)     | 1053.6<br>(606.0 to 627.3)     |
| Portugal                  | 1453.8<br>(1,453.1 to 1,535.2) | 1378.3<br>(1,320.9 to 1,404.5) | 1286.4<br>(1,225.9 to 1,297.3) | 1206.9<br>(1,132.6 to 1,196.6) | 1129.5<br>(1,060.5 to 1,123.2) | 1045.5<br>(900.2 to 1,060.8)   | 940.9<br>(811.5 to 838.6)      | 849.9<br>(691.5 to 838.6)      | 771.3<br>(623.2 to 763.9)      | 685.1<br>(623.2 to 763.9)      |
| Spain                     | 1201.9<br>(1,182.9 to 1,223.6) | 1106.2<br>(1,111.5 to 1,155.8) | 1029.6<br>(985.1 to 1,021.6)   | 929.6<br>(908.4 to 966.0)      | 851.3<br>(889.2 to 917.5)      | 791.6<br>(827.4 to 862.3)      | 710.1<br>(757.8 to 786.6)      | 617.8<br>(690.3 to 717.5)      | 525.8<br>(599.0 to 621.8)      | 490.0<br>(541.6 to 574.8)      |
| Sweden                    | 1080.2<br>(985.5 to 1,103.9)   | 1003.6<br>(1,003.6 to 1,103.9) | 928.5<br>(1,006.9 to 1,104.2)  | 838.7<br>(912.1 to 976.6)      | 752.3<br>(846.4 to 905.4)      | 710.3<br>(771.0 to 824.1)      | 618.8<br>(708.3 to 757.9)      | 518.8<br>(647.7 to 693.3)      | 431.4<br>(583.3 to 622.6)      | 324.4<br>(516.0 to 642.7)      |
| Switzerland               | 1301.4<br>(1,120.3 to 1,366.1) | 1192.5<br>(1,014.6 to 1,153.7) | 1087.8<br>(959.3 to 1,084.3)   | 972.2<br>(871.9 to 986.8)      | 922.5<br>(847.1 to 954.9)      | 912.5<br>(772.3 to 875.4)      | 849.3<br>(873.6 to 952.3)      | 782.2<br>(794.0 to 878.6)      | 706.2<br>(531.0 to 603.1)      | 696.1<br>(390.3 to 603.1)      |
| United Kingdom            | 1301.4<br>(1,304.9 to 1,247.4) | 1261.1<br>(1,266.9 to 1,305.4) | 1199.9<br>(1,189.7 to 1,244.6) | 1024.1<br>(1,111.9 to 1,135.6) | 911.0<br>(1,007.9 to 1,029.1   |                                |                                |                                |                                |                                |

Appendix Table 19B. Age-standardized mortality rates, males, 1970, 1975, 1980, 1985, 1990, 1995, 2000, 2005, 2010, 2016

| Location                               | 1970                         | 1975                         | 1980                         | 1985                         | 1990                         | 1995                         | 2000                         | 2005                         | 2010                         | 2016                         |
|----------------------------------------|------------------------------|------------------------------|------------------------------|------------------------------|------------------------------|------------------------------|------------------------------|------------------------------|------------------------------|------------------------------|
| Mongolia                               | 1,967 (1,797.2 to 2,184.1)   | 1,748 (1,583.8 to 1,902.8)   | 1,751.6 (1,595.5 to 1,907.8) | 1,698.0 (1,539.1 to 1,863.4) | 1,651.6 (1,530.9 to 1,816.8) | 1,829.3 (1,684.4 to 1,968.5) | 1,825.0 (1,676.3 to 1,961.6) | 1,907.0 (1,751.4 to 2,060.1) | 1,692.4 (1,567.0 to 1,771.6) | 1,623.2 (1,487.5 to 1,737.6) |
| Tajikistan                             | 1,469.4 (1,446.6 to 1,866.3) | 1,582.1 (1,664.7 to 1,748.4) | 1,455.7 (1,260.6 to 1,857.7) | 1,396.1 (1,256.5 to 1,558.9) | 1,476.1 (1,257.9 to 1,530.9) | 1,396.1 (1,331.3 to 1,625.1) | 1,476.1 (1,309.1 to 1,593.8) | 1,446.2 (1,321.8 to 1,525.2) | 1,392.5 (938.1 to 1,244.9)   | 1,257.5 (1,173.9 to 1,237.5) |
| Turkmenistan                           | 1,227.4 (1,222.4 to 1,529.6) | 1,790.7 (1,649.7 to 2,053.0) | 1,674.3 (1,583.5 to 1,771.4) | 1,584.7 (1,526.9 to 1,643.2) | 1,582.9 (1,528.9 to 1,639.4) | 1,675.8 (1,617.7 to 1,734.2) | 1,636.2 (1,569.9 to 1,702.6) | 1,533.6 (1,473.7 to 1,593.4) | 1,374.9 (1,317.7 to 1,434.3) | 1,251.3 (1,173.7 to 1,237.8) |
| Uzbekistan                             | 1,543.3 (1,363.7 to 1,749.5) | 1,465.7 (1,323.0 to 1,646.2) | 1,467.7 (1,296.6 to 1,548.1) | 1,407.6 (1,260.7 to 1,428.9) | 1,366.9 (1,275.4 to 1,447.4) | 1,562.0 (1,447.8 to 1,638.9) | 1,588.9 (1,471.1 to 1,657.0) | 1,588.9 (1,481.2 to 1,712.2) | 1,409.8 (1,326.6 to 1,484.8) | 1,160.8 (1,145.4 to 1,174.7) |
| Latin America and Caribbean            | 1,501.1 (1,508.1 to 1,511.9) | 1,371.9 (1,372.7 to 1,422.9) | 1,318.7 (1,294.5 to 1,342.1) | 1,281.1 (1,263.7 to 1,315.3) | 1,281.1 (1,172.8 to 1,353.3) | 1,281.1 (1,172.8 to 1,353.3) | 1,281.1 (1,172.8 to 1,353.3) | 1,281.1 (1,172.8 to 1,353.3) | 1,281.1 (1,172.8 to 1,353.3) | 1,281.1 (1,172.8 to 1,353.3) |
| Central Latin America                  | 1,421.6 (1,387.5 to 1,455.0) | 1,316.7 (1,284.6 to 1,346.0) | 1,208.3 (1,208.3 to 1,253.0) | 1,193.2 (1,171.7 to 1,214.8) | 1,064.3 (1,045.8 to 1,081.3) | 1,020.5 (1,002.5 to 1,039.2) | 933.6 (917.3 to 951.0)       | 885.0 (869.1 to 892.0)       | 856.9 (839.1 to 874.3)       | 806.4 (775.0 to 840.6)       |
| Colombia                               | 1,217.7 (1,182.2 to 1,254.7) | 1,175.7 (1,128.7 to 1,239.3) | 1,169.9 (1,112.8 to 1,239.3) | 1,203.1 (1,227.0 to 1,339.0) | 1,099.7 (1,073.7 to 1,147.9) | 1,079.7 (1,046.3 to 1,114.5) | 1,012.5 (981.6 to 1,044.2)   | 912.5 (882.9 to 942.2)       | 828.9 (802.9 to 853.9)       | 782.3 (664.9 to 844.1)       |
| Costa Rica                             | 1,105.1 (1,069.4 to 1,159.6) | 997.6 (961.7 to 1,056.1)     | 889.0 (853.9 to 924.6)       | 849.1 (815.8 to 882.2)       | 872.0 (797.1 to 970.1)       | 817.3 (786.6 to 849.2)       | 757.1 (729.7 to 787.3)       | 672.9 (646.6 to 702.9)       | 609.6 (583.8 to 636.6)       | 584.4 (558.5 to 614.1)       |
| El Salvador                            | 2,055.0 (1,871.3 to 2,210.2) | 1,571.4 (1,431.5 to 1,576.7) | 1,209.9 (1,163.3 to 1,310.6) | 1,458.1 (1,321.1 to 1,493.7) | 1,421.9 (1,208.6 to 1,330.2) | 1,210.9 (1,091.3 to 1,207.4) | 1,197.6 (1,096.6 to 1,113.2) | 1,139.3 (937.4 to 1,032.9)   | 1,052.9 (888.1 to 993.6)     | 993.8 (774.9 to 995.9)       |
| Guatemala                              | 1,704.3 (1,548.7 to 1,824.9) | 1,493.7 (1,339.2 to 1,622.0) | 1,190.1 (1,114.3 to 1,460.2) | 1,089.1 (1,013.7 to 1,400.1) | 1,092.3 (917.7 to 1,332.7)   | 1,089.1 (882.3 to 1,413.7)   | 1,072.2 (831.0 to 1,364.9)   | 1,044.7 (786.6 to 1,357.6)   | 999.9 (748.8 to 1,314.6)     | 923.3 (711.8 to 1,265.1)     |
| Honduras                               | 1,421.6 (1,387.5 to 1,455.0) | 1,316.7 (1,284.6 to 1,346.0) | 1,208.3 (1,208.3 to 1,253.0) | 1,193.2 (1,171.7 to 1,214.8) | 1,064.3 (1,045.8 to 1,081.3) | 1,020.5 (1,002.5 to 1,039.2) | 933.6 (917.3 to 951.0)       | 885.0 (869.1 to 892.0)       | 856.9 (839.1 to 874.3)       | 806.4 (775.0 to 840.6)       |
| Mexico                                 | 1,217.7 (1,182.2 to 1,254.7) | 1,175.7 (1,128.7 to 1,239.3) | 1,169.9 (1,112.8 to 1,239.3) | 1,203.1 (1,227.0 to 1,339.0) | 1,099.7 (1,073.7 to 1,147.9) | 1,079.7 (1,046.3 to 1,114.5) | 1,012.5 (981.6 to 1,044.2)   | 912.5 (882.9 to 942.2)       | 828.9 (802.9 to 853.9)       | 782.3 (664.9 to 844.1)       |
| Nicaragua                              | 1,489.3 (1,384.4 to 1,574.9) | 1,218.9 (1,167.4 to 1,270.9) | 1,061.7 (959.5 to 1,155.2)   | 1,294.6 (1,112.4 to 1,476.8) | 848.2 (813.8 to 886.2)       | 887.6 (842.2 to 939.9)       | 792.6 (747.2 to 839.1)       | 743.9 (741.2 to 810.2)       | 729.2 (668.4 to 811.9)       | 729.2 (668.4 to 811.9)       |
| Panama                                 | 1,116.8 (1,039.9 to 1,195.2) | 980.3 (909.8 to 1,053.6)     | 891.8 (833.4 to 955.9)       | 891.8 (833.4 to 955.9)       | 873.3 (815.2 to 949.6)       | 873.3 (815.2 to 949.6)       | 873.3 (815.2 to 949.6)       | 873.3 (815.2 to 949.6)       | 873.3 (815.2 to 949.6)       | 873.3 (815.2 to 949.6)       |
| Venezuela                              | 1,173.5 to 1,136.4           | 1,163.3 to 1,206.4           | 1,163.3 to 1,206.4           | 1,163.3 to 1,206.4           | 1,163.3 to 1,206.4           | 1,163.3 to 1,206.4           | 1,163.3 to 1,206.4           | 1,163.3 to 1,206.4           | 1,163.3 to 1,206.4           | 1,163.3 to 1,206.4           |
| Andean Latin America                   | 1,342.8 (1,605.4 to 2,316.0) | 1,356.7 (1,300.1 to 1,420.4) | 1,262.2 (1,234.4 to 1,337.0) | 1,227.1 (1,176.1 to 1,277.4) | 1,108.5 (1,064.9 to 1,159.4) | 1,074.2 (981.6 to 1,024.2)   | 902.8 (865.4 to 941.1)       | 804.9 (767.0 to 841.7)       | 763.6 (723.6 to 807.1)       | 688.6 (618.5 to 764.2)       |
| Bolivia                                | 1,224.9 (1,025.0 to 2,221.3) | 1,191.2 (1,089.1 to 1,293.3) | 1,102.6 (1,031.3 to 1,174.2) | 1,064.4 (1,048.3 to 1,142.2) | 1,004.4 (981.0 to 1,027.0)   | 935.8 (910.7 to 958.8)       | 864.2 (845.9 to 882.5)       | 806.8 (788.6 to 824.6)       | 754.5 (728.1 to 780.6)       | 584.4 (558.5 to 614.1)       |
| Ecuador                                | 2,264.4 (1,649.6 to 2,930.4) | 1,252.9 (1,168.7 to 1,363.8) | 1,252.9 (1,168.7 to 1,363.8) | 1,252.9 (1,168.7 to 1,363.8) | 1,252.9 (1,168.7 to 1,363.8) | 1,252.9 (1,168.7 to 1,363.8) | 1,252.9 (1,168.7 to 1,363.8) | 1,252.9 (1,168.7 to 1,363.8) | 1,252.9 (1,168.7 to 1,363.8) | 1,252.9 (1,168.7 to 1,363.8) |
| Peru                                   | 1,389.9 (1,342.3 to 1,441.7) | 1,196.5 (1,120.8 to 1,367.6) | 1,196.5 (1,120.8 to 1,367.6) | 1,196.5 (1,120.8 to 1,367.6) | 1,196.5 (1,120.8 to 1,367.6) | 1,196.5 (1,120.8 to 1,367.6) | 1,196.5 (1,120.8 to 1,367.6) | 1,196.5 (1,120.8 to 1,367.6) | 1,196.5 (1,120.8 to 1,367.6) | 1,196.5 (1,120.8 to 1,367.6) |
| Caribbean                              | 1,560.3 (1,450.8 to 1,683.9) | 1,594.4 (1,476.6 to 1,721.1) | 1,594.4 (1,476.6 to 1,721.1) | 1,594.4 (1,476.6 to 1,721.1) | 1,594.4 (1,476.6 to 1,721.1) | 1,594.4 (1,476.6 to 1,721.1) | 1,594.4 (1,476.6 to 1,721.1) | 1,594.4 (1,476.6 to 1,721.1) | 1,594.4 (1,476.6 to 1,721.1) | 1,594.4 (1,476.6 to 1,721.1) |
| Antigua and Barbuda                    | 1,541.9 (1,458.4 to 1,628.7) | 1,423.3 (1,347.2 to 1,482.4) | 1,423.3 (1,347.2 to 1,482.4) | 1,423.3 (1,347.2 to 1,482.4) | 1,423.3 (1,347.2 to 1,482.4) | 1,423.3 (1,347.2 to 1,482.4) | 1,423.3 (1,347.2 to 1,482.4) | 1,423.3 (1,347.2 to 1,482.4) | 1,423.3 (1,347.2 to 1,482.4) | 1,423.3 (1,347.2 to 1,482.4) |
| The Bahamas                            | 1,297.4 (1,142.9 to 1,362.6) | 1,125.5 (1,082.9 to 1,231.3) | 1,061.7 (959.5 to 1,155.2)   | 1,294.6 (1,112.4 to 1,476.8) | 848.2 (813.8 to 886.2)       | 887.6 (842.2 to 939.9)       | 792.6 (747.2 to 839.1)       | 743.9 (741.2 to 810.2)       | 729.2 (668.4 to 811.9)       | 729.2 (668.4 to 811.9)       |
| Barbados                               | 1,167.0 (1,080.3 to 1,246.9) | 1,145.2 (1,089.4 to 1,204.5) | 1,145.2 (1,089.4 to 1,204.5) | 1,145.2 (1,089.4 to 1,204.5) | 1,145.2 (1,089.4 to 1,204.5) | 1,145.2 (1,089.4 to 1,204.5) | 1,145.2 (1,089.4 to 1,204.5) | 1,145.2 (1,089.4 to 1,204.5) | 1,145.2 (1,089.4 to 1,204.5) | 1,145.2 (1,089.4 to 1,204.5) |
| Belize                                 | 1,167.0 (1,080.3 to 1,246.9) | 1,145.2 (1,089.4 to 1,204.5) | 1,145.2 (1,089.4 to 1,204.5) | 1,145.2 (1,089.4 to 1,204.5) | 1,145.2 (1,089.4 to 1,204.5) | 1,145.2 (1,089.4 to 1,204.5) | 1,145.2 (1,089.4 to 1,204.5) | 1,145.2 (1,089.4 to 1,204.5) | 1,145.2 (1,089.4 to 1,204.5) | 1,145.2 (1,089.4 to 1,204.5) |
| Bermuda                                | 1,082.1 (1,041.9 to 1,126.2) | 997.9 (959.0 to 1,038.3)     | 912.6 (897.7 to 926.0)       | 912.6 (897.7 to 926.0)       | 912.6 (897.7 to 926.0)       | 912.6 (897.7 to 926.0)       | 912.6 (897.7 to 926.0)       | 912.6 (897.7 to 926.0)       | 912.6 (897.7 to 926.0)       | 912.6 (897.7 to 926.0)       |
| Cuba                                   | 1,082.1 (1,041.9 to 1,126.2) | 997.9 (959.0 to 1,038.3)     | 912.6 (897.7 to 926.0)       | 912.6 (897.7 to 926.0)       | 912.6 (897.7 to 926.0)       | 912.6 (897.7 to 926.0)       | 912.6 (897.7 to 926.0)       | 912.6 (897.7 to 926.0)       | 912.6 (897.7 to 926.0)       | 912.6 (897.7 to 926.0)       |
| Dominica                               | 1,167.0 (1,080.3 to 1,246.9) | 1,145.2 (1,089.4 to 1,204.5) | 1,145.2 (1,089.4 to 1,204.5) | 1,145.2 (1,089.4 to 1,204.5) | 1,145.2 (1,089.4 to 1,204.5) | 1,145.2 (1,089.4 to 1,204.5) | 1,145.2 (1,089.4 to 1,204.5) | 1,145.2 (1,089.4 to 1,204.5) | 1,145.2 (1,089.4 to 1,204.5) | 1,145.2 (1,089.4 to 1,204.5) |
| Dominican Republic                     | 1,345.3 (1,167.0 to 1,518.3) | 1,281.6 (1,117.4 to 1,454.2) | 1,281.6 (1,117.4 to 1,454.2) | 1,281.6 (1,117.4 to 1,454.2) | 1,281.6 (1,117.4 to 1,454.2) | 1,281.6 (1,117.4 to 1,454.2) | 1,281.6 (1,117.4 to 1,454.2) | 1,281.6 (1,117.4 to 1,454.2) | 1,281.6 (1,117.4 to 1,454.2) | 1,281.6 (1,117.4 to 1,454.2) |
| Grenada                                | 1,234.9 (1,080.3 to 1,389.5) | 1,204.2 (1,137.4 to 1,271.0) | 1,204.2 (1,137.4 to 1,271.0) | 1,204.2 (1,137.4 to 1,271.0) | 1,204.2 (1,137.4 to 1,271.0) | 1,204.2 (1,137.4 to 1,271.0) | 1,204.2 (1,137.4 to 1,271.0) | 1,204.2 (1,137.4 to 1,271.0) | 1,204.2 (1,137.4 to 1,271.0) | 1,204.2 (1,137.4 to 1,271.0) |
| Guyana                                 | 2,341.9 (2,061.6 to 2,615.9) | 2,002.4 (1,933.4 to 2,067.5) | 2,002.4 (1,933.4 to 2,067.5) | 2,002.4 (1,933.4 to 2,067.5) | 2,002.4 (1,933.4 to 2,067.5) | 2,002.4 (1,933.4 to 2,067.5) | 2,002.4 (1,933.4 to 2,067.5) | 2,002.4 (1,933.4 to 2,067.5) | 2,002.4 (1,933.4 to 2,067.5) | 2,002.4 (1,933.4 to 2,067.5) |
| Haiti                                  | 1,133.8 to 1,231.3           | 1,133.8 to 1,231.3           | 1,133.8 to 1,231.3           | 1,133.8 to 1,231.3           | 1,133.8 to 1,231.3           | 1,133.8 to 1,231.3           | 1,133.8 to 1,231.3           | 1,133.8 to 1,231.3           | 1,133.8 to 1,231.3           | 1,133.8 to 1,231.3           |
| Jamaica                                | 1,133.8 to 1,231.3           | 1,133.8 to 1,231.3           | 1,133.8 to 1,231.3           | 1,133.8 to 1,231.3           | 1,133.8 to 1,231.3           | 1,133.8 to 1,231.3           | 1,133.8 to 1,231.3           | 1,133.8 to 1,231.3           | 1,133.8 to 1,231.3           | 1,133.8 to 1,231.3           |
| Puerto Rico                            | 1,133.8 to 1,231.3           | 1,133.8 to 1,231.3           | 1,133.8 to 1,231.3           | 1,133.8 to 1,231.3           | 1,133.8 to 1,231.3           | 1,133.8 to 1,231.3           | 1,133.8 to 1,231.3           | 1,133.8 to 1,231.3           | 1,133.8 to 1,231.3           | 1,133.8 to 1,231.3           |
| Saint Lucia                            | 1,133.8 to 1,231.3           | 1,133.8 to 1,231.3           | 1,133.8 to 1,231.3           | 1,133.8 to 1,231.3           | 1,133.8 to 1,231.3           | 1,133.8 to 1,231.3           | 1,133.8 to 1,231.3           | 1,133.8 to 1,231.3           | 1,133.8 to 1,231.3           | 1,133.8 to 1,231.3           |
| Saint Vincent and the Grenadines       | 1,133.8 to 1,231.3           | 1,133.8 to 1,231.3           | 1,133.8 to 1,231.3           | 1,133.8 to 1,231.3           | 1,133.8 to 1,231.3           | 1,133.8 to 1,231.3           | 1,133.8 to 1,231.3           | 1,133.8 to 1,231.3           | 1,133.8 to 1,231.3           | 1,133.8 to 1,231.3           |
| Suriname                               | 1,133.8 to 1,231.3           | 1,133.8 to 1,231.3           | 1,133.8 to 1,231.3           | 1,133.8 to 1,231.3           | 1,133.8 to 1,231.3           | 1,133.8 to 1,231.3           | 1,133.8 to 1,231.3           | 1,133.8 to 1,231.3           | 1,133.8 to 1,231.3           | 1,133.8 to 1,231.3           |
| Trinidad and Tobago                    | 1,133.8 to 1,231.3           | 1,133.8 to 1,231.3           | 1,133.8 to 1,231.3           | 1,133.8 to 1,231.3           | 1,133.8 to 1,231.3           | 1,133.8 to 1,231.3           | 1,133.8 to 1,231.3           | 1,133.8 to 1,231.3           | 1,133.8 to 1,231.3           | 1,133.8 to 1,231.3           |
| Virgin Islands, U.S.                   | 1,133.8 to 1,231.3           | 1,133.8 to 1,231.3           | 1,133.8 to 1,231.3           | 1,133.8 to 1,231.3           | 1,133.8 to 1,231.3           | 1,133.8 to 1,231.3           | 1,133.8 to 1,231.3           | 1,133.8 to 1,231.3           | 1,133.8 to 1,231.3           | 1,133.8 to 1,231.3           |
| Tropical Latin America                 | 1,679.7 (1,472.3 to 1,722.2) | 1,526.6 (1,472.3 to 1,578.4) | 1,462.2 (1,427.3 to 1,489.9) | 1,458.2 (1,424.9 to 1,489.9) | 1,395.1 (1,361.7 to 1,428.0) | 1,374.6 (1,314.9 to 1,374.6) | 1,271.4 (1,241.6 to 1,304.1) | 1,161.0 (1,111.0 to 1,161.0) | 1,028.8 (999.0 to 1,048.8)   | 952.2 (925.6 to 966.6)       |
| Brazil                                 | 1,604.1 (1,583.4 to 1,737.1) | 1,472.3 (1,480.4 to 1,591.8) | 1,472.3 (1,480.4 to 1,591.8) | 1,472.3 (1,480.4 to 1,591.8) | 1,472.3 (1,480.4 to 1,591.8) | 1,472.3 (1,480.4 to 1,591.8) | 1,472.3 (1,480.4 to 1,591.8) | 1,472.3 (1,480.4 to 1,591.8) | 1,472.3 (1,480.4 to 1,591.8) | 1,472.3 (1,480.4 to 1,591.8) |
| Paraguay                               | 1,027.5 (989.5 to 1,067.3)   | 1,008.1 (961.5 to 1,059.8)   | 1,008.1 (961.5 to 1,059.8)   | 1,008.1 (961.5 to 1,059.8)   | 1,008.1 (961.5 to 1,059.8)   | 1,008.1 (961.5 to 1,059.8)   | 1,008.1 (961.5 to 1,059.8)   | 1,008.1 (961.5 to 1,059.8)   | 1,008.1 (961.5 to 1,059.8)   | 1,008.1 (961.5 to 1,059.8)   |
| Southeast Asia, East Asia, and Oceania | 1,608.1 (1,588.9 to 1,883.5) | 1,626.1 (1,508.7 to 1,585.0) | 1,626.1 (1,508.7 to 1,585.0) | 1,626.1 (1,508.7 to 1,585.0) | 1,626.1 (1,508.7 to 1,585.0) | 1,626.1 (1,508.7 to 1,585.0) | 1,626.1 (1,508.7 to 1,585.0) | 1,626.1 (1,508.7 to 1,585.0) | 1,626.1 (1,508.7 to 1,585.0) | 1,626.1 (1,508.7 to 1,585.0) |
| East Asia                              | 1,574.9 (1,480.6 to 1,574.9) | 1,574.9 (1,480.6 to 1,574.9  |                              |                              |                              |                              |                              |                              |                              |                              |

Appendix Table 19B. Age-standardized mortality rates, males, 1970, 1975, 1980, 1985, 1990, 1995, 2000, 2005, 2010, 2016

| Location                    | 1970                            | 1975                            | 1980                            | 1985                            | 1990                            | 1995                            | 2000                            | 2005                            | 2010                            | 2016                            |
|-----------------------------|---------------------------------|---------------------------------|---------------------------------|---------------------------------|---------------------------------|---------------------------------|---------------------------------|---------------------------------|---------------------------------|---------------------------------|
| Iran                        | 1,549.9<br>(1,342.1 to 1,737.7) | 1,223.6<br>(1,070.5 to 1,392.2) | 1,065.2<br>(925.3 to 1,209.5)   | 1,145.1<br>(982.1 to 1,320.5)   | 1,124.4<br>(966.3 to 1,300.6)   | 1,110.4<br>(960.3 to 1,249.5)   | 1,083.2<br>(938.5 to 1,233.0)   | 1,043.2<br>(879.1 to 1,267.4)   | 920.4<br>(762.2 to 1,120.5)     | 851.1<br>(713.7 to 1,034.3)     |
| Iraq                        | 1,588.7<br>(1,462.0 to 1,713.1) | 1,578.7<br>(1,460.0 to 1,702.0) | 1,689.6<br>(1,552.3 to 1,834.3) | 1,699.6<br>(1,564.2 to 1,778.4) | 1,445.8<br>(1,160.5 to 1,603.0) | 1,445.8<br>(1,254.8 to 1,703.9) | 1,457.9<br>(1,271.1 to 1,672.0) | 1,455.5<br>(1,193.6 to 1,792.1) | 1,455.5<br>(1,193.6 to 1,669.4) | 1,208.8<br>(1,052.0 to 1,656.0) |
| Jordan                      | 1,517.1<br>(1,384.2 to 1,651.1) | 1,433.2<br>(1,294.3 to 1,604.7) | 1,346.8<br>(1,194.3 to 1,502.4) | 1,140.4<br>(1,024.3 to 1,298.5) | 977.0<br>(888.7 to 1,011.3)     | 935.6<br>(826.9 to 1,079.2)     | 908.2<br>(796.6 to 1,013.2)     | 823.1<br>(772.0 to 1,113.5)     | 809.3<br>(654.2 to 1,007.6)     | 790.7<br>(598.2 to 1,023.0)     |
| Kuwait                      | 1,255.6<br>(1,100.4 to 1,429.2) | 1,207.6<br>(1,071.7 to 1,367.8) | 1,207.6<br>(932.9 to 1,927.7)   | 921.0<br>(806.8 to 1,047.5)     | 772.2<br>(677.1 to 930.0)       | 722.2<br>(624.4 to 891.5)       | 727.4<br>(633.4 to 817.7)       | 727.4<br>(594.0 to 789.0)       | 585.9<br>(510.4 to 672.3)       | 585.9<br>(377.5 to 765.3)       |
| Lebanon                     | 1,296.2<br>(1,160.6 to 1,583.4) | 1,296.2<br>(1,294.3 to 2,368.4) | 1,598.9<br>(1,508.3 to 1,342.0) | 1,598.9<br>(1,233.6 to 1,942.7) | 1,296.2<br>(1,065.2 to 1,408.7) | 1,296.2<br>(876.3 to 944.1)     | 1,296.2<br>(650.9 to 835.0)     | 1,296.2<br>(650.9 to 735.7)     | 1,296.2<br>(510.4 to 672.3)     | 1,296.2<br>(377.5 to 765.3)     |
| Libya                       | 1,126.8<br>(1,029.2 to 1,239.1) | 1,033.0<br>(947.3 to 1,143.1)   | 1,033.0<br>(888.9 to 1,077.1)   | 945.7<br>(851.1 to 1,041.6)     | 928.2<br>(840.6 to 1,007.5)     | 928.2<br>(797.5 to 953.8)       | 874.3<br>(792.7 to 928.4)       | 874.3<br>(792.7 to 928.4)       | 835.5<br>(742.0 to 957.0)       | 835.5<br>(810.2 to 1,039.2)     |
| Morocco                     | 1,189.7<br>(1,023.3 to 1,489.7) | 1,089.7<br>(1,593.9 to 1,764.5) | 1,240.3<br>(1,026.0 to 1,662.3) | 1,148.8<br>(943.3 to 1,317.9)   | 1,115.9<br>(921.9 to 1,283.3)   | 1,115.9<br>(965.6 to 1,253.9)   | 1,120.6<br>(1,007.0 to 1,230.0) | 1,120.6<br>(1,255.8 to 1,346.1) | 1,311.0<br>(1,315.0 to 1,366.2) | 1,355.8<br>(1,283.2 to 1,420.7) |
| Pakistan                    | 1,751.0<br>(1,613.4 to 1,884.4) | 1,535.2<br>(1,408.7 to 1,657.7) | 1,297.4<br>(1,187.2 to 1,389.9) | 1,141.1<br>(1,040.1 to 1,235.4) | 1,044.9<br>(969.3 to 1,113.1)   | 943.4<br>(885.2 to 1,004.5)     | 931.0<br>(844.2 to 1,032.6)     | 896.6<br>(830.6 to 978.5)       | 891.3<br>(822.5 to 962.6)       | 861.5<br>(761.7 to 861.5)       |
| Qatar                       | 1,178.4<br>(1,048.7 to 1,310.5) | 1,018.3<br>(912.9 to 1,134.8)   | 930.2<br>(834.6 to 1,035.3)     | 922.8<br>(834.5 to 1,016.9)     | 927.7<br>(869.7 to 1,006.5)     | 927.7<br>(869.7 to 1,006.5)     | 927.7<br>(869.7 to 1,006.5)     | 927.7<br>(869.7 to 1,006.5)     | 927.7<br>(869.7 to 1,006.5)     | 927.7<br>(869.7 to 1,006.5)     |
| Saudi Arabia                | 1,210.5<br>(1,048.7 to 1,384.4) | 1,018.3<br>(912.9 to 1,134.8)   | 930.2<br>(834.6 to 1,035.3)     | 922.8<br>(834.5 to 1,016.9)     | 927.7<br>(869.7 to 1,006.5)     | 927.7<br>(869.7 to 1,006.5)     | 927.7<br>(869.7 to 1,006.5)     | 927.7<br>(869.7 to 1,006.5)     | 927.7<br>(869.7 to 1,006.5)     | 927.7<br>(869.7 to 1,006.5)     |
| Sudan                       | 1,210.5<br>(1,048.7 to 1,384.4) | 1,018.3<br>(912.9 to 1,134.8)   | 930.2<br>(834.6 to 1,035.3)     | 922.8<br>(834.5 to 1,016.9)     | 927.7<br>(869.7 to 1,006.5)     | 927.7<br>(869.7 to 1,006.5)     | 927.7<br>(869.7 to 1,006.5)     | 927.7<br>(869.7 to 1,006.5)     | 927.7<br>(869.7 to 1,006.5)     | 927.7<br>(869.7 to 1,006.5)     |
| Syria                       | 1,210.5<br>(1,048.7 to 1,384.4) | 1,018.3<br>(912.9 to 1,134.8)   | 930.2<br>(834.6 to 1,035.3)     | 922.8<br>(834.5 to 1,016.9)     | 927.7<br>(869.7 to 1,006.5)     | 927.7<br>(869.7 to 1,006.5)     | 927.7<br>(869.7 to 1,006.5)     | 927.7<br>(869.7 to 1,006.5)     | 927.7<br>(869.7 to 1,006.5)     | 927.7<br>(869.7 to 1,006.5)     |
| Tunisia                     | 1,210.5<br>(1,048.7 to 1,384.4) | 1,018.3<br>(912.9 to 1,134.8)   | 930.2<br>(834.6 to 1,035.3)     | 922.8<br>(834.5 to 1,016.9)     | 927.7<br>(869.7 to 1,006.5)     | 927.7<br>(869.7 to 1,006.5)     | 927.7<br>(869.7 to 1,006.5)     | 927.7<br>(869.7 to 1,006.5)     | 927.7<br>(869.7 to 1,006.5)     | 927.7<br>(869.7 to 1,006.5)     |
| Turkey                      | 1,210.5<br>(1,048.7 to 1,384.4) | 1,018.3<br>(912.9 to 1,134.8)   | 930.2<br>(834.6 to 1,035.3)     | 922.8<br>(834.5 to 1,016.9)     | 927.7<br>(869.7 to 1,006.5)     | 927.7<br>(869.7 to 1,006.5)     | 927.7<br>(869.7 to 1,006.5)     | 927.7<br>(869.7 to 1,006.5)     | 927.7<br>(869.7 to 1,006.5)     | 927.7<br>(869.7 to 1,006.5)     |
| United Arab Emirates        | 1,210.5<br>(1,048.7 to 1,384.4) | 1,018.3<br>(912.9 to 1,134.8)   | 930.2<br>(834.6 to 1,035.3)     | 922.8<br>(834.5 to 1,016.9)     | 927.7<br>(869.7 to 1,006.5)     | 927.7<br>(869.7 to 1,006.5)     | 927.7<br>(869.7 to 1,006.5)     | 927.7<br>(869.7 to 1,006.5)     | 927.7<br>(869.7 to 1,006.5)     | 927.7<br>(869.7 to 1,006.5)     |
| Yemen                       | 1,210.5<br>(1,048.7 to 1,384.4) | 1,018.3<br>(912.9 to 1,134.8)   | 930.2<br>(834.6 to 1,035.3)     | 922.8<br>(834.5 to 1,016.9)     | 927.7<br>(869.7 to 1,006.5)     | 927.7<br>(869.7 to 1,006.5)     | 927.7<br>(869.7 to 1,006.5)     | 927.7<br>(869.7 to 1,006.5)     | 927.7<br>(869.7 to 1,006.5)     | 927.7<br>(869.7 to 1,006.5)     |
| South Asia                  | 2,253.5<br>(2,177.0 to 2,331.6) | 2,069.5<br>(2,010.9 to 2,128.9) | 1,849.0<br>(1,849.0 to 1,946.4) | 1,742.0<br>(1,742.0 to 1,826.8) | 1,687.5<br>(1,687.5 to 1,727.0) | 1,606.4<br>(1,568.8 to 1,644.4) | 1,526.8<br>(1,494.8 to 1,563.9) | 1,431.7<br>(1,399.4 to 1,466.0) | 1,349.3<br>(1,316.1 to 1,384.6) | 1,275.9<br>(1,202.8 to 1,375.9) |
| South Asia                  | 2,253.5<br>(2,177.0 to 2,331.6) | 2,069.5<br>(2,010.9 to 2,128.9) | 1,849.0<br>(1,849.0 to 1,946.4) | 1,742.0<br>(1,742.0 to 1,826.8) | 1,687.5<br>(1,687.5 to 1,727.0) | 1,606.4<br>(1,568.8 to 1,644.4) | 1,526.8<br>(1,494.8 to 1,563.9) | 1,431.7<br>(1,399.4 to 1,466.0) | 1,349.3<br>(1,316.1 to 1,384.6) | 1,275.9<br>(1,202.8 to 1,375.9) |
| Bangladesh                  | 1,910.7<br>(1,681.5 to 2,132.2) | 1,760.9<br>(1,571.4 to 2,007.3) | 1,608.8<br>(1,494.5 to 1,713.4) | 1,513.5<br>(1,370.9 to 1,645.6) | 1,428.2<br>(1,236.0 to 1,540.9) | 1,366.4<br>(1,138.5 to 1,499.2) | 1,316.6<br>(1,054.0 to 1,516.2) | 1,271.9<br>(917.8 to 1,536.2)   | 1,237.2<br>(847.2 to 1,566.7)   | 1,203.2<br>(772.9 to 1,628.7)   |
| Bhutan                      | 1,910.7<br>(1,681.5 to 2,132.2) | 1,760.9<br>(1,571.4 to 2,007.3) | 1,608.8<br>(1,494.5 to 1,713.4) | 1,513.5<br>(1,370.9 to 1,645.6) | 1,428.2<br>(1,236.0 to 1,540.9) | 1,366.4<br>(1,138.5 to 1,499.2) | 1,316.6<br>(1,054.0 to 1,516.2) | 1,271.9<br>(917.8 to 1,536.2)   | 1,237.2<br>(847.2 to 1,566.7)   | 1,203.2<br>(772.9 to 1,628.7)   |
| India                       | 1,910.7<br>(1,681.5 to 2,132.2) | 1,760.9<br>(1,571.4 to 2,007.3) | 1,608.8<br>(1,494.5 to 1,713.4) | 1,513.5<br>(1,370.9 to 1,645.6) | 1,428.2<br>(1,236.0 to 1,540.9) | 1,366.4<br>(1,138.5 to 1,499.2) | 1,316.6<br>(1,054.0 to 1,516.2) | 1,271.9<br>(917.8 to 1,536.2)   | 1,237.2<br>(847.2 to 1,566.7)   | 1,203.2<br>(772.9 to 1,628.7)   |
| Nepal                       | 1,910.7<br>(1,681.5 to 2,132.2) | 1,760.9<br>(1,571.4 to 2,007.3) | 1,608.8<br>(1,494.5 to 1,713.4) | 1,513.5<br>(1,370.9 to 1,645.6) | 1,428.2<br>(1,236.0 to 1,540.9) | 1,366.4<br>(1,138.5 to 1,499.2) | 1,316.6<br>(1,054.0 to 1,516.2) | 1,271.9<br>(917.8 to 1,536.2)   | 1,237.2<br>(847.2 to 1,566.7)   | 1,203.2<br>(772.9 to 1,628.7)   |
| Pakistan                    | 1,910.7<br>(1,681.5 to 2,132.2) | 1,760.9<br>(1,571.4 to 2,007.3) | 1,608.8<br>(1,494.5 to 1,713.4) | 1,513.5<br>(1,370.9 to 1,645.6) | 1,428.2<br>(1,236.0 to 1,540.9) | 1,366.4<br>(1,138.5 to 1,499.2) | 1,316.6<br>(1,054.0 to 1,516.2) | 1,271.9<br>(917.8 to 1,536.2)   | 1,237.2<br>(847.2 to 1,566.7)   | 1,203.2<br>(772.9 to 1,628.7)   |
| Sub-Saharan Africa          | 2,253.5<br>(2,177.0 to 2,331.6) | 2,069.5<br>(2,010.9 to 2,128.9) | 1,849.0<br>(1,849.0 to 1,946.4) | 1,742.0<br>(1,742.0 to 1,826.8) | 1,687.5<br>(1,687.5 to 1,727.0) | 1,606.4<br>(1,568.8 to 1,644.4) | 1,526.8<br>(1,494.8 to 1,563.9) | 1,431.7<br>(1,399.4 to 1,466.0) | 1,349.3<br>(1,316.1 to 1,384.6) | 1,275.9<br>(1,202.8 to 1,375.9) |
| Sub-Saharan Africa          | 2,253.5<br>(2,177.0 to 2,331.6) | 2,069.5<br>(2,010.9 to 2,128.9) | 1,849.0<br>(1,849.0 to 1,946.4) | 1,742.0<br>(1,742.0 to 1,826.8) | 1,687.5<br>(1,687.5 to 1,727.0) | 1,606.4<br>(1,568.8 to 1,644.4) | 1,526.8<br>(1,494.8 to 1,563.9) | 1,431.7<br>(1,399.4 to 1,466.0) | 1,349.3<br>(1,316.1 to 1,384.6) | 1,275.9<br>(1,202.8 to 1,375.9) |
| Southern Sub-Saharan Africa | 1,910.7<br>(1,681.5 to 2,132.2) | 1,760.9<br>(1,571.4 to 2,007.3) | 1,608.8<br>(1,494.5 to 1,713.4) | 1,513.5<br>(1,370.9 to 1,645.6) | 1,428.2<br>(1,236.0 to 1,540.9) | 1,366.4<br>(1,138.5 to 1,499.2) | 1,316.6<br>(1,054.0 to 1,516.2) | 1,271.9<br>(917.8 to 1,536.2)   | 1,237.2<br>(847.2 to 1,566.7)   | 1,203.2<br>(772.9 to 1,628.7)   |
| Botswana                    | 1,910.7<br>(1,681.5 to 2,132.2) | 1,760.9<br>(1,571.4 to 2,007.3) | 1,608.8<br>(1,494.5 to 1,713.4) | 1,513.5<br>(1,370.9 to 1,645.6) | 1,428.2<br>(1,236.0 to 1,540.9) | 1,366.4<br>(1,138.5 to 1,499.2) | 1,316.6<br>(1,054.0 to 1,516.2) | 1,271.9<br>(917.8 to 1,536.2)   | 1,237.2<br>(847.2 to 1,566.7)   | 1,203.2<br>(772.9 to 1,628.7)   |
| Zimbabwe                    | 1,910.7<br>(1,681.5 to 2,132.2) | 1,760.9<br>(1,571.4 to 2,007.3) | 1,608.8<br>(1,494.5 to 1,713.4) | 1,513.5<br>(1,370.9 to 1,645.6) | 1,428.2<br>(1,236.0 to 1,540.9) | 1,366.4<br>(1,138.5 to 1,499.2) | 1,316.6<br>(1,054.0 to 1,516.2) | 1,271.9<br>(917.8 to 1,536.2)   | 1,237.2<br>(847.2 to 1,566.7)   | 1,203.2<br>(772.9 to 1,628.7)   |
| Western Sub-Saharan Africa  | 1,910.7<br>(1,681.5 to 2,132.2) | 1,760.9<br>(1,571.4 to 2,007.3) | 1,608.8<br>(1,494.5 to 1,713.4) | 1,513.5<br>(1,370.9 to 1,645.6) | 1,428.2<br>(1,236.0 to 1,540.9) | 1,366.4<br>(1,138.5 to 1,499.2) | 1,316.6<br>(1,054.0 to 1,516.2) | 1,271.9<br>(917.8 to 1,536.2)   | 1,237.2<br>(847.2 to 1,566.7)   | 1,203.2<br>(772.9 to 1,628.7)   |
| Benin                       | 1,910.7<br>(1,681.5 to 2,132.2) | 1,760.9<br>(1,571.4 to 2,007.3) | 1,608.8<br>(1,494.5 to 1,713.4) | 1,513.5<br>(1,370.9 to 1,645.6) | 1,428.2<br>(1,236.0 to 1,540.9) | 1,366.4<br>(1,138.5 to 1,499.2) | 1,316.6<br>(1,054.0 to 1,516.2) | 1,271.9<br>(917.8 to 1,536.2)   | 1,237.2<br>(847.2 to 1,566.7)   | 1,203.2<br>(772.9 to 1,628.7)   |
| Burkina Faso                | 1,910.7<br>(1,681.5 to 2,132.2) | 1,760.9<br>(1,571.4 to 2,007.3) | 1,608.8<br>(1,494.5 to 1,713.4) | 1,513.5<br>(1,370.9 to 1,645.6) | 1,428.2<br>(1,236.0 to 1,540.9) | 1,366.4<br>(1,138.5 to 1,499.2) | 1,316.6<br>(1,054.0 to 1,516.2) | 1,271.9<br>(917.8 to 1,536.2)   | 1,237.2<br>(847.2 to 1,566.7)   | 1,203.2<br>(772.9 to 1,628.7)   |
| Cameroun                    | 1,910.7<br>(1,681.5 to 2,132.2) | 1,760.9<br>(1,571.4 to 2,007.3) | 1,608.8<br>(1,494.5 to 1,713.4) | 1,513.5<br>(1,370.9 to 1,645.6) | 1,428.2<br>(1,236.0 to 1,540.9) | 1,366.4<br>(1,138.5 to 1,499.2) | 1,316.6<br>(1,054.0 to 1,516.2) | 1,271.9<br>(917.8 to 1,536.2)   | 1,237.2<br>(847.2 to 1,566.7)   | 1,203.2<br>(772.9 to 1,628.7)   |
| Cape Verde                  | 1,910.7<br>(1,681.5 to 2,132.2) | 1,760.9<br>(1,571.4 to 2,007.3) | 1,608.8<br>(1,494.5 to 1,713.4) | 1,513.5<br>(1,370.9 to 1,645.6) | 1,428.2<br>(1,236.0 to 1,540.9) | 1,366.4<br>(1,138.5 to 1,499.2) | 1,316.6<br>(1,054.0 to 1,516.2) | 1,271.9<br>(917.8 to 1,536.2)   | 1,237.2<br>(847.2 to 1,566.7)   | 1,203.2<br>(772.9 to 1,628.7)   |
| Chad                        | 1,910.7<br>(1,681.5 to 2,132.2) | 1,760.9<br>(1,571.4 to 2,007.3) | 1,608.8<br>(1,494.5 to 1,713.4) | 1,513.5<br>(1,370.9 to 1,645.6) | 1,428.2<br>(1,236.0 to 1,540.9) | 1,366.4<br>(1,138.5 to 1,499.2) | 1,316.6<br>(1,054.0 to 1,516.2) | 1,271.9<br>(917.8 to 1,536.2)   | 1,237.2<br>(847.2 to 1,566.7)   | 1,203.2<br>(772.9 to 1,628.7)   |
| Cote d'Ivoire               | 1,910.7<br>(1,681.5 to 2,132.2) | 1,760.9<br>(1,571.4 to 2,007.3) | 1,608.8<br>(1,494.5 to 1,713.4) | 1,513.5<br>(1,370.9 to 1,645.6) | 1,428.2<br>(1,236.0 to 1,540.9) | 1,366.4<br>(1,138.5 to 1,499.2) | 1,316.6<br>(1,054.0 to 1,516.2) | 1,271.9<br>(917.8 to 1,536.2)   | 1,237.2<br>(847.2 to 1,566.7)   | 1,203.2<br>(772.9 to 1,628.7)   |
| The Gambia                  | 1,910.7<br>(1,681.5 to 2,132.2) | 1,760.9<br>(1,571.4 to 2,007.3) | 1,608.8<br>(1,494.5 to 1,713.4) | 1,513.5<br>(1,370.9 to 1,645.6) | 1,428.2<br>(1,236.0 to 1,540.9) | 1,366.4<br>(1,138.5 to 1,499.2) | 1,316.6<br>(1,054.0 to 1,516.2) | 1,271.9<br>(917.8 to 1,536.2)   | 1,237.2<br>(847.2 to 1,566.7)   | 1,203.2<br>(772.9 to 1,628.7)   |
| Ghana                       | 1,910.7<br>(1,681.5 to 2,132.2) | 1,760.9<br>(1,571.4 to 2,007.3) | 1,608.8<br>(1,494.5 to 1,713.4) | 1,513.5<br>(1,370.9 to 1,645.6) | 1,428.2<br>(1,236.0 to 1,540.9) | 1,366.4<br>(1,138.5 to 1,499.2) | 1,316.6<br>(1,054.0 to 1,516.2) | 1,271.9<br>(917.8 to 1,536.2)   | 1,237.2<br>(847.2 to 1,566.7)   | 1,203.2<br>(772.9 to 1,628.7)   |
| Guinea                      | 1,910.7<br>(1,681.5 to 2,132.2) | 1,760.9<br>(1,571.4 to 2,007.3) | 1,608.8<br>(1,494.5 to 1,713.4) | 1,513.5<br>(1,370.9 to 1,645.6) | 1,428.2<br>(1,236.0 to 1,540.9) | 1,366.4<br>(1,138.5 to 1,499.2) | 1,316.6<br>(1,054.0 to 1,516.2) | 1,271.9<br>(917.8 to 1,536.2)   | 1,23                            |                                 |

Appendix Table 19C. Age-standardized mortality rates, females, 1970, 1975, 1980, 1985, 1990, 1995, 2000, 2005, 2010, 2016

| Location                  | 1970                            | 1975                            | 1980                            | 1985                            | 1990                            | 1995                            | 2000                            | 2005                            | 2010                            | 2016                            |
|---------------------------|---------------------------------|---------------------------------|---------------------------------|---------------------------------|---------------------------------|---------------------------------|---------------------------------|---------------------------------|---------------------------------|---------------------------------|
| Global                    | 1,367.4<br>(1,351.5 to 1,384.2) | 1,264.7<br>(1,250.6 to 1,278.5) | 1,177.5<br>(1,165.5 to 1,190.7) | 1,107.0<br>(1,096.7 to 1,118.2) | 1,036.9<br>(1,026.9 to 1,047.4) | 1,009.1<br>(999.3 to 1,019.2)   | 952.4<br>(943.3 to 961.4)       | 876.6<br>(868.0 to 884.7)       | 782.7<br>(773.7 to 791.8)       | 696.5<br>(678.2 to 706.3)       |
| High SDI                  | 848.5<br>(836.7 to 861.4)       | 772.5<br>(763.6 to 781.5)       | 694.6<br>(688.3 to 700.9)       | 644.9<br>(639.3 to 650.2)       | 590.6<br>(585.1 to 595.3)       | 546.6<br>(546.4 to 555.2)       | 506.4<br>(502.6 to 510.4)       | 460.7<br>(457.4 to 464.3)       | 420.0<br>(416.5 to 423.6)       | 400.0<br>(392.3 to 407.7)       |
| High-middle SDI           | 1,049.0<br>(1,019.7 to 1,078.7) | 979.1<br>(951.6 to 1,005.8)     | 941.3<br>(913.2 to 968.7)       | 850.2<br>(827.0 to 873.6)       | 811.3<br>(782.3 to 840.3)       | 797.8<br>(776.0 to 819.5)       | 737.1<br>(713.0 to 755.4)       | 629.1<br>(613.1 to 646.1)       | 550.1<br>(530.8 to 561.2)       | 500.0<br>(480.0 to 520.0)       |
| Low-middle SDI            | 1,485.3<br>(1,451.9 to 1,517.9) | 1,350.9<br>(1,322.2 to 1,380.9) | 1,262.6<br>(1,233.2 to 1,299.6) | 1,162.4<br>(1,139.6 to 1,185.0) | 1,079.0<br>(1,058.2 to 1,100.5) | 1,010.2<br>(991.4 to 1,028.7)   | 937.9<br>(922.6 to 952.7)       | 852.7<br>(840.1 to 865.5)       | 753.9<br>(741.9 to 765.5)       | 653.6<br>(640.6 to 667.4)       |
| Low SDI                   | 2,015.5<br>(1,964.5 to 2,066.5) | 1,856.9<br>(1,810.1 to 1,902.5) | 1,700.4<br>(1,663.6 to 1,737.4) | 1,559.5<br>(1,558.1 to 1,629.4) | 1,495.0<br>(1,462.5 to 1,527.6) | 1,438.7<br>(1,406.6 to 1,468.8) | 1,354.7<br>(1,324.4 to 1,384.2) | 1,244.7<br>(1,220.1 to 1,272.4) | 1,120.7<br>(1,094.1 to 1,146.8) | 989.5<br>(962.3 to 1,018.9)     |
| High-income               | 2,227.8<br>(2,151.8 to 2,303.8) | 2,143.4<br>(2,077.4 to 2,208.4) | 2,056.7<br>(1,998.8 to 2,113.1) | 1,993.0<br>(1,942.5 to 2,044.8) | 1,926.9<br>(1,881.1 to 1,972.9) | 1,938.4<br>(1,887.1 to 1,985.6) | 1,914.4<br>(1,859.8 to 1,967.2) | 1,774.8<br>(1,728.0 to 1,827.2) | 1,622.3<br>(1,569.1 to 1,683.6) | 1,380.5<br>(1,330.5 to 1,436.1) |
| High-income North America | 851.3<br>(839.8 to 864.2)       | 773.0<br>(764.3 to 782.3)       | 686.0<br>(679.7 to 691.6)       | 631.9<br>(626.4 to 637.3)       | 577.8<br>(572.9 to 582.7)       | 531.1<br>(532.9 to 541.5)       | 496.1<br>(492.4 to 500.2)       | 452.7<br>(449.2 to 456.1)       | 413.5<br>(410.2 to 416.9)       | 394.7<br>(387.4 to 402.7)       |
| Canada                    | 782.3<br>(775.8 to 788.8)       | 697.0<br>(691.4 to 702.6)       | 620.5<br>(614.9 to 625.7)       | 607.0<br>(602.1 to 612.3)       | 575.0<br>(571.1 to 580.4)       | 537.5<br>(531.2 to 544.8)       | 551.0<br>(546.7 to 555.4)       | 517.4<br>(513.2 to 521.6)       | 474.0<br>(470.1 to 477.9)       | 469.0<br>(460.0 to 478.3)       |
| Greenland                 | 1,224.4<br>(1,192.2 to 1,265.3) | 2,016.4<br>(1,878.6 to 2,148.9) | 2,028.8<br>(1,763.2 to 2,030.1) | 1,896.4<br>(1,903.6 to 2,162.2) | 1,768.4<br>(1,707.5 to 2,011.8) | 1,768.4<br>(1,623.6 to 1,915.9) | 1,668.5<br>(1,635.3 to 1,886.9) | 1,235.6<br>(1,538.2 to 1,799.1) | 1,027.3<br>(1,121.8 to 1,352.8) | 1,027.3<br>(815.2 to 1,247.7)   |
| United States             | 788.5<br>(781.5 to 795.4)       | 707.7<br>(694.9 to 706.5)       | 634.8<br>(628.7 to 640.2)       | 582.2<br>(607.4 to 618.5)       | 531.1<br>(577.3 to 587.2)       | 497.4<br>(568.1 to 578.0)       | 465.2<br>(555.5 to 564.7)       | 425.8<br>(522.6 to 531.2)       | 372.7<br>(478.7 to 487.0)       | 358.1<br>(470.0 to 490.1)       |
| Australia                 | 835.9<br>(819.3 to 851.5)       | 740.8<br>(732.6 to 763.9)       | 659.1<br>(641.2 to 667.8)       | 602.1<br>(588.5 to 615.1)       | 545.2<br>(531.5 to 557.3)       | 497.4<br>(484.7 to 509.0)       | 445.2<br>(434.3 to 456.6)       | 400.4<br>(402.5 to 418.8)       | 372.7<br>(363.9 to 382.1)       | 358.1<br>(332.3 to 389.9)       |
| New Zealand               | 833.7<br>(807.5 to 856.9)       | 784.4<br>(763.6 to 808.2)       | 723.9<br>(700.3 to 744.1)       | 681.6<br>(662.0 to 701.8)       | 611.8<br>(593.5 to 631.5)       | 558.9<br>(542.8 to 576.2)       | 498.7<br>(483.4 to 513.1)       | 462.5<br>(448.8 to 476.5)       | 424.3<br>(411.4 to 438.5)       | 401.3<br>(353.3 to 449.6)       |
| High-income Asia Pacific  | 942.7<br>(877.6 to 1,019.2)     | 828.7<br>(787.1 to 872.4)       | 698.0<br>(683.3 to 713.6)       | 596.6<br>(583.0 to 611.9)       | 523.2<br>(511.4 to 536.3)       | 462.9<br>(451.0 to 470.3)       | 396.7<br>(387.5 to 406.3)       | 349.1<br>(340.7 to 358.0)       | 292.6<br>(308.1 to 323.6)       | 292.6<br>(271.3 to 318.7)       |
| Brunei                    | 1,266.8<br>(1,084.4 to 1,401.7) | 1,066.8<br>(914.9 to 1,155.2)   | 863.7<br>(918.2 to 1,228.2)     | 783.7<br>(803.6 to 963.9)       | 733.4<br>(707.6 to 879.6)       | 733.4<br>(662.7 to 835.8)       | 634.5<br>(580.5 to 684.0)       | 599.9<br>(565.7 to 644.2)       | 579.7<br>(553.1 to 625.3)       | 579.7<br>(472.5 to 651.0)       |
| Japan                     | 867.9<br>(837.6 to 897.5)       | 754.3<br>(737.1 to 774.2)       | 639.8<br>(636.5 to 643.1)       | 549.5<br>(542.8 to 548.3)       | 479.5<br>(477.2 to 482.0)       | 424.8<br>(421.2 to 428.4)       | 325.8<br>(361.8 to 366.2)       | 298.8<br>(323.7 to 327.9)       | 276.1<br>(296.7 to 300.8)       | 276.1<br>(269.4 to 282.9)       |
| Singapore                 | 1,023.3<br>(905.8 to 1,144.4)   | 927.8<br>(820.1 to 1,035.1)     | 887.2<br>(794.0 to 999.7)       | 808.3<br>(689.0 to 881.1)       | 747.7<br>(558.4 to 742.0)       | 688.7<br>(484.0 to 640.8)       | 608.7<br>(414.5 to 539.1)       | 591.5<br>(357.0 to 466.9)       | 404.7<br>(298.3 to 381.1)       | 374.9<br>(237.5 to 384.8)       |
| South Korea               | 1,144.3<br>(813.6 to 1,649.5)   | 1,144.3<br>(892.4 to 1,433.1)   | 942.7<br>(845.9 to 1,044.2)     | 837.4<br>(744.2 to 934.1)       | 747.7<br>(668.0 to 836.6)       | 668.7<br>(600.0 to 746.5)       | 591.5<br>(531.3 to 655.6)       | 484.0<br>(433.0 to 536.6)       | 404.7<br>(368.8 to 451.1)       | 374.9<br>(269.4 to 509.6)       |
| Western Europe            | 851.1<br>(840.1 to 864.8)       | 789.7<br>(779.1 to 801.3)       | 709.7<br>(696.6 to 716.3)       | 647.5<br>(638.5 to 656.3)       | 586.7<br>(578.5 to 595.2)       | 536.7<br>(529.9 to 543.7)       | 484.0<br>(483.0 to 496.3)       | 440.4<br>(436.9 to 448.7)       | 374.9<br>(368.0 to 409.4)       | 374.9<br>(352.0 to 389.5)       |
| Andorra                   | 526.1<br>(369.5 to 725.6)       | 494.3<br>(345.4 to 640.1)       | 459.1<br>(337.0 to 580.6)       | 449.6<br>(327.7 to 543.8)       | 429.8<br>(327.7 to 543.8)       | 403.8<br>(318.2 to 518.2)       | 342.3<br>(273.3 to 447.5)       | 312.6<br>(256.8 to 393.7)       | 311.9<br>(253.7 to 406.5)       | 311.9<br>(268.0 to 426.5)       |
| Austria                   | 949.8<br>(929.0 to 971.0)       | 873.7<br>(853.4 to 892.5)       | 803.0<br>(785.9 to 820.6)       | 726.0<br>(710.2 to 742.9)       | 635.6<br>(620.6 to 650.6)       | 575.5<br>(562.1 to 588.4)       | 515.6<br>(503.3 to 527.1)       | 461.4<br>(450.8 to 473.0)       | 420.7<br>(410.6 to 431.0)       | 392.9<br>(365.6 to 420.7)       |
| Belgium                   | 908.3<br>(879.1 to 943.1)       | 842.4<br>(811.8 to 874.7)       | 750.9<br>(724.9 to 779.1)       | 682.5<br>(658.7 to 706.5)       | 597.0<br>(575.3 to 621.5)       | 511.4<br>(532.6 to 571.3)       | 469.1<br>(497.9 to 536.8)       | 469.1<br>(449.5 to 486.6)       | 438.5<br>(422.0 to 456.8)       | 407.8<br>(361.7 to 452.8)       |
| Cyprus                    | 1,055.8<br>(1,019.0 to 1,113.8) | 1,055.8<br>(1,000.1 to 1,110.1) | 1,055.8<br>(919.2 to 1,009.6)   | 1,055.8<br>(826.4 to 899.4)     | 1,055.8<br>(758.4 to 828.6)     | 1,055.8<br>(671.9 to 733.5)     | 1,055.8<br>(590.3 to 645.0)     | 1,055.8<br>(522.7 to 571.3)     | 1,055.8<br>(439.4 to 486.4)     | 1,055.8<br>(417.2 to 467.6)     |
| Denmark                   | 776.5<br>(729.6 to 823.7)       | 715.5<br>(667.9 to 761.6)       | 657.0<br>(645.2 to 729.2)       | 627.9<br>(627.9 to 720.6)       | 591.9<br>(609.7 to 700.8)       | 551.0<br>(605.4 to 691.3)       | 506.8<br>(556.5 to 639.2)       | 454.1<br>(508.4 to 583.0)       | 429.5<br>(456.3 to 524.2)       | 429.5<br>(372.6 to 489.1)       |
| Finland                   | 699.0<br>(941.0 to 998.6)       | 699.0<br>(797.1 to 846.8)       | 699.0<br>(678.1 to 724.0)       | 699.0<br>(633.4 to 671.6)       | 699.0<br>(611.4 to 651.7)       | 699.0<br>(545.5 to 580.2)       | 699.0<br>(502.2 to 532.7)       | 699.0<br>(438.6 to 468.2)       | 699.0<br>(403.6 to 631.6)       | 699.0<br>(331.7 to 393.1)       |
| France                    | 756.6<br>(738.0 to 775.8)       | 699.0<br>(681.5 to 717.5)       | 619.9<br>(602.9 to 636.9)       | 560.3<br>(546.3 to 576.6)       | 491.9<br>(479.0 to 505.9)       | 431.0<br>(432.3 to 463.9)       | 382.5<br>(412.4 to 436.1)       | 349.6<br>(372.2 to 394.4)       | 326.3<br>(335.9 to 359.7)       | 326.3<br>(269.9 to 345.3)       |
| Germany                   | 952.4<br>(904.5 to 999.2)       | 885.6<br>(844.5 to 929.2)       | 790.9<br>(753.6 to 828.9)       | 718.8<br>(618.8 to 685.8)       | 650.6<br>(556.6 to 616.2)       | 584.3<br>(496.7 to 550.6)       | 523.3<br>(462.5 to 499.0)       | 475.7<br>(452.5 to 499.0)       | 444.0<br>(420.1 to 466.4)       | 413.3<br>(373.8 to 451.9)       |
| Greece                    | 767.0<br>(745.7 to 789.7)       | 701.1<br>(681.7 to 722.9)       | 555.9<br>(538.3 to 573.2)       | 615.7<br>(598.2 to 634.3)       | 595.9<br>(577.4 to 614.5)       | 544.5<br>(528.6 to 561.3)       | 503.7<br>(489.0 to 519.5)       | 460.7<br>(445.8 to 474.7)       | 427.5<br>(414.3 to 439.0)       | 409.9<br>(377.8 to 443.4)       |
| Iceland                   | 728.1<br>(688.7 to 765.5)       | 633.8<br>(602.4 to 667.9)       | 559.3<br>(528.5 to 592.3)       | 541.1<br>(511.5 to 569.8)       | 538.3<br>(509.4 to 569.4)       | 529.5<br>(500.3 to 558.6)       | 476.2<br>(450.4 to 504.7)       | 428.0<br>(401.8 to 455.8)       | 393.2<br>(369.6 to 414.8)       | 387.5<br>(346.7 to 433.1)       |
| Ireland                   | 927.0<br>(878.7 to 975.7)       | 891.6<br>(843.4 to 940.6)       | 821.2<br>(778.5 to 866.2)       | 752.6<br>(709.5 to 799.0)       | 699.9<br>(660.9 to 739.5)       | 652.1<br>(615.4 to 690.9)       | 607.5<br>(573.2 to 644.0)       | 565.5<br>(541.4 to 589.7)       | 542.5<br>(418.3 to 467.7)       | 542.5<br>(354.7 to 411.3)       |
| Israel                    | 987.8<br>(877.7 to 1,107.2)     | 903.0<br>(816.9 to 992.4)       | 819.0<br>(732.9 to 911.1)       | 772.0<br>(695.9 to 857.3)       | 704.8<br>(636.4 to 782.8)       | 638.5<br>(575.0 to 701.0)       | 534.4<br>(477.9 to 593.6)       | 480.7<br>(429.7 to 534.7)       | 378.6<br>(362.9 to 447.6)       | 378.6<br>(311.2 to 464.6)       |
| Italy                     | 846.1<br>(825.1 to 866.8)       | 782.0<br>(765.1 to 801.9)       | 726.3<br>(685.6 to 716.6)       | 626.3<br>(611.4 to 640.4)       | 551.0<br>(537.2 to 563.4)       | 497.7<br>(485.4 to 509.4)       | 445.9<br>(434.7 to 456.4)       | 400.0<br>(392.3 to 410.5)       | 375.1<br>(365.5 to 384.8)       | 361.4<br>(335.8 to 387.7)       |
| Luxembourg                | 935.8<br>(893.5 to 972.4)       | 883.2<br>(848.3 to 924.5)       | 711.6<br>(752.5 to 820.0)       | 648.8<br>(684.8 to 745.3)       | 562.2<br>(619.9 to 678.2)       | 488.7<br>(534.6 to 589.2)       | 403.3<br>(464.5 to 512.3)       | 343.3<br>(422.4 to 465.5)       | 300.0<br>(383.1 to 424.5)       | 300.0<br>(336.3 to 438.1)       |
| Malta                     | 1,124.1<br>(1,027.2 to 1,230.5) | 1,064.6<br>(970.9 to 1,168.5)   | 1,032.1<br>(944.3 to 1,129.0)   | 866.6<br>(789.4 to 957.3)       | 710.5<br>(638.7 to 790.3)       | 605.3<br>(542.6 to 666.9)       | 512.3<br>(461.5 to 564.8)       | 444.2<br>(409.9 to 491.3)       | 389.6<br>(313.1 to 468.9)       | 389.6<br>(363.9 to 408.9)       |
| Netherlands               | 759.6<br>(725.2 to 791.6)       | 682.0<br>(653.7 to 711.6)       | 602.0<br>(574.2 to 629.1)       | 575.2<br>(552.6 to 599.6)       | 555.8<br>(529.9 to 580.2)       | 548.9<br>(527.6 to 573.2)       | 537.2<br>(514.7 to 559.2)       | 537.2<br>(486.3 to 508.6)       | 537.2<br>(418.3 to 458.7)       | 537.2<br>(313.1 to 442.0)       |
| Norway                    | 729.4<br>(698.9 to 759.3)       | 676.5<br>(646.9 to 707.8)       | 614.0<br>(587.3 to 641.4)       | 584.6<br>(558.8 to 610.9)       | 560.7<br>(536.0 to 586.4)       | 530.4<br>(508.5 to 555.1)       | 499.5<br>(478.3 to 523.9)       | 450.1<br>(429.3 to 473.6)       | 417.3<br>(398.4 to 437.9)       | 381.8<br>(333.3 to 432.7)       |
| Portugal                  | 1,022.1<br>(995.9 to 1,046.3)   | 911.9<br>(883.0 to 939.0)       | 807.2<br>(784.9 to 831.0)       | 723.3<br>(702.7 to 745.5)       | 670.2<br>(651.3 to 689.9)       | 610.1<br>(591.9 to 628.6)       | 552.1<br>(536.1 to 569.6)       | 483.1<br>(466.4 to 500.0)       | 424.8<br>(412.5 to 438.7)       | 384.6<br>(355.1 to 413.3)       |
| Spain                     | 835.5<br>(815.0 to 845.6)       | 753.7<br>(739.3 to 769.1)       | 628.5<br>(625.3 to 651.3)       | 581.6<br>(570.9 to 593.7)       | 530.8<br>(520.5 to 540.5)       | 476.4<br>(467.1 to 486.2)       | 434.0<br>(425.2 to 442.2)       | 396.1<br>(389.0 to 404.4)       | 348.2<br>(341.5 to 355.6)       | 322.7<br>(307.2 to 340.5)       |
| Sweden                    | 731.4<br>(684.1 to 780.5)       | 676.8<br>(640.4 to 714.1)       | 626.3<br>(602.4 to 646.4)       | 573.0<br>(553.1 to 592.9)       | 517.4<br>(526.8 to 564.3)       | 484.0<br>(482.5 to 517.7)       | 440.7<br>(460.9 to 492.5)       | 398.9<br>(432.1 to 461.7)       | 369.0<br>(393.2 to 422.6)       | 337.3<br>(340.9 to 447.7)       |
| Switzerland               | 798.7<br>(752.7 to 853.7)       | 752.6<br>(632.2 to 724.4)       | 652.6<br>(582.6 to 664.0)       | 517.4<br>(517.1 to 586.6)       | 484.0<br>(485.7 to 552.2)       | 440.7<br>(455.1 to 516.3)       | 400.0<br>(412.2 to 472.5)       | 369.0<br>(373.1 to 421.9)       | 337.3<br>(346.7 to 392.2)       | 337.3<br>(254.5 to 446.5)       |
| United Kingdom            | 825.7<br>(810.8 to 842.0)       | 794.1<br>(782.1 to 806.5)       | 737.8<br>(728.1 to 746.8)       | 690.3<br>(682.5 to 697.6)       | 633.9<br>(626.7 to 641.8)       | 596.2<br>(589.4 to 602.8)       | 546.6<br>(541.3 to 554.6)       | 497.5<br>(493.3 to 505.6)       | 426.7<br>(442.0 to 452.7)       | 426.7<br>(418.3 to 435.9)       |
| England                   | 812.5<br>(798.0 to 827.3)       | 781.0<br>(769.1 to 792.8)       | 725.9<br>(717.4 to 734.1)       | 679.5<br>(662.6 to 684.4)       | 625.4<br>(617.4 to 627.8)       | 575.4<br>(580.5 to 590.0)       | 524.4<br>(533.1 to 542.4)       | 489.2<br>(484.7 to 493.3)       | 436.4<br>(432.5 to 440.5)       | 436.4<br>(410.5 to 423.0)       |
| Northern Ireland          | 898.3<br>(848.6 to 950.3)       | 874.1<br>(823.7 to 927.0)       | 799.4<br>(749.9 to 818.7)       | 744.6<br>(689.3 to 814.7)       | 671.4<br>(613.4 to 726.7)       | 619.4<br>(563.8 to 670.8)       | 566.0<br>(518.7 to 618.1)       | 513.6<br>(471.4 to 558.0)       | 465.2<br>(427.7 to 505.0)       | 446.5<br>(381.2 to 520.4)       |
| Scotland                  | 915.2<br>(872.0 to 963.0)       | 881.5<br>(837.3 to 927.1)       | 821.0<br>(775.5 to 866.4)       | 781.1<br>(722.3 to 843.8)       | 726.9<br>(672.6 to 785.4)       | 684.7<br>(634.2 to 737.1)       | 628.5<br>(577.4 to 680.4)       | 583.9<br>(536.3 to 635.6)       | 530.1<br>(492.0 to 570.6)       | 500                             |

Appendix Table 19C. Age-standardized mortality rates, females, 1970, 1975, 1980, 1985, 1990, 1995, 2000, 2005, 2010, 2016

| Location                    | 1970                            | 1975                            | 1980                            | 1985                            | 1990                            | 1995                            | 2000                            | 2005                            | 2010                          | 2016                          |
|-----------------------------|---------------------------------|---------------------------------|---------------------------------|---------------------------------|---------------------------------|---------------------------------|---------------------------------|---------------------------------|-------------------------------|-------------------------------|
| Czech Republic              | 1,014.3<br>(899.5 to 1,037.1)   | 965.3<br>(844.0 to 989.9)       | 970.7<br>(847.0 to 995.8)       | 937.3<br>(816.3 to 959.6)       | 867.4<br>(748.6 to 887.9)       | 772.5<br>(669.9 to 792.7)       | 687.3<br>(594.6 to 706.1)       | 624.7<br>(544.6 to 641.2)       | 558.1<br>(481.1 to 572.1)     | 488.1<br>(419.1 to 519.2)     |
| Hungary                     | 1,034.5<br>(978.6 to 1,085.3)   | 1,001.4<br>(953.2 to 1,050.2)   | 993.9<br>(944.5 to 1,047.9)     | 966.8<br>(918.8 to 1,021.4)     | 912.4<br>(861.5 to 963.2)       | 858.1<br>(815.0 to 903.3)       | 808.1<br>(736.4 to 817.1)       | 777.7<br>(664.8 to 743.1)       | 705.4<br>(615.8 to 682.9)     | 649.1<br>(544.5 to 687.4)     |
| Macedonia                   | 1,015.9<br>(932.1 to 1,125.1)   | 974.2<br>(894.5 to 1,074.2)     | 974.2<br>(887.5 to 1,019.0)     | 954.3<br>(887.5 to 1,019.0)     | 969.9<br>(901.6 to 1,026.4)     | 937.9<br>(871.1 to 1,000.6)     | 937.9<br>(880.5 to 990.7)       | 937.9<br>(840.3 to 955.7)       | 937.9<br>(772.3 to 866.6)     | 937.9<br>(687.6 to 786.6)     |
| Montenegro                  | 759.3<br>(675.9 to 840.0)       | 748.8<br>(644.2 to 845.8)       | 684.5<br>(616.4 to 770.6)       | 670.5<br>(617.2 to 709.9)       | 645.4<br>(594.9 to 713.3)       | 690.9<br>(643.7 to 736.3)       | 707.5<br>(660.7 to 757.4)       | 659.4<br>(621.2 to 697.1)       | 608.8<br>(555.8 to 655.5)     | 580.0<br>(502.5 to 641.3)     |
| Poland                      | 920.1<br>(829.9 to 952.7)       | 862.4<br>(829.9 to 896.5)       | 856.0<br>(829.9 to 886.7)       | 861.2<br>(829.9 to 896.5)       | 815.8<br>(785.4 to 848.7)       | 792.2<br>(743.3 to 798.6)       | 678.0<br>(652.6 to 704.8)       | 595.1<br>(518.1 to 557.3)       | 538.3<br>(431.2 to 532.2)     | 479.8<br>(352.2 to 532.2)     |
| Romania                     | 1,059.9<br>(1,014.1 to 1,108.9) | 977.9<br>(934.1 to 1,025.0)     | 1,005.9<br>(963.0 to 1,052.5)   | 960.5<br>(915.1 to 1,006.8)     | 913.0<br>(869.4 to 957.3)       | 872.2<br>(827.2 to 904.0)       | 826.8<br>(787.2 to 865.8)       | 767.1<br>(729.9 to 818.9)       | 680.7<br>(643.0 to 712.9)     | 614.7<br>(550.7 to 682.6)     |
| Serbia                      | 944.5<br>(847.8 to 1,026.6)     | 866.9<br>(763.4 to 944.0)       | 825.3<br>(723.7 to 906.0)       | 795.1<br>(714.3 to 873.2)       | 801.1<br>(726.5 to 867.4)       | 904.8<br>(837.2 to 953.3)       | 876.6<br>(819.9 to 929.9)       | 819.2<br>(769.0 to 872.5)       | 725.5<br>(687.4 to 764.6)     | 628.0<br>(596.9 to 663.9)     |
| Slovakia                    | 969.7<br>(947.7 to 1,034.8)     | 927.4<br>(888.4 to 966.8)       | 892.2<br>(870.5 to 945.9)       | 896.2<br>(856.5 to 922.1)       | 850.7<br>(813.7 to 886.8)       | 820.7<br>(749.7 to 820.3)       | 731.2<br>(699.7 to 768.4)       | 686.7<br>(656.1 to 716.3)       | 622.3<br>(590.0 to 650.7)     | 556.2<br>(484.8 to 631.5)     |
| Slovenia                    | 1,049.9<br>(746.2 to 1,401.0)   | 970.8<br>(745.7 to 1,228.0)     | 970.8<br>(755.9 to 1,049.9)     | 828.6<br>(760.1 to 904.0)       | 714.4<br>(654.0 to 779.6)       | 665.8<br>(610.4 to 724.8)       | 585.2<br>(538.9 to 630.0)       | 519.3<br>(470.1 to 567.0)       | 454.1<br>(406.4 to 483.1)     | 396.1<br>(337.5 to 454.0)     |
| Central Asia                | 1,171.0<br>(1,056.3 to 1,303.7) | 1,074.4<br>(971.1 to 1,192.6)   | 1,074.4<br>(933.7 to 1,051.2)   | 989.8<br>(914.5 to 990.8)       | 942.0<br>(911.8 to 875.3)       | 1,063.6<br>(1,027.0 to 1,102.0) | 1,028.6<br>(994.0 to 1,065.3)   | 1,014.7<br>(975.7 to 1,055.4)   | 1,028.6<br>(875.0 to 934.7)   | 1,028.6<br>(728.3 to 831.2)   |
| Armenia                     | 949.7<br>(867.2 to 1,125.5)     | 798.3<br>(709.4 to 999.2)       | 798.3<br>(719.0 to 881.2)       | 853.7<br>(755.6 to 849.6)       | 826.3<br>(779.3 to 873.7)       | 848.1<br>(803.0 to 902.6)       | 762.3<br>(717.4 to 808.2)       | 745.2<br>(700.6 to 798.7)       | 745.2<br>(687.1 to 791.1)     | 745.2<br>(514.3 to 655.0)     |
| Azerbaijan                  | 1,068.4<br>(985.7 to 1,137.5)   | 979.6<br>(862.2 to 1,194.4)     | 979.6<br>(856.5 to 1,086.5)     | 979.6<br>(901.1 to 1,050.1)     | 979.6<br>(895.1 to 1,029.8)     | 979.6<br>(893.8 to 1,142.1)     | 979.6<br>(979.1 to 1,134.8)     | 979.6<br>(929.0 to 1,120.2)     | 979.6<br>(885.9 to 1,076.3)   | 979.6<br>(617.5 to 885.6)     |
| Georgia                     | 978.9<br>(777.1 to 1,201.3)     | 882.8<br>(686.7 to 1,091.7)     | 807.3<br>(698.3 to 920.8)       | 829.1<br>(761.3 to 894.8)       | 839.0<br>(774.1 to 909.7)       | 792.5<br>(734.9 to 849.8)       | 742.2<br>(669.7 to 767.4)       | 717.5<br>(614.1 to 691.0)       | 640.0<br>(614.1 to 691.0)     | 600.5<br>(473.5 to 726.3)     |
| Kazakhstan                  | 1,245.8<br>(1,022.4 to 1,515.6) | 1,125.4<br>(930.7 to 1,373.0)   | 1,000.5<br>(919.3 to 1,089.4)   | 999.2<br>(958.4 to 1,041.4)     | 979.8<br>(939.1 to 1,023.5)     | 1,141.4<br>(1,091.8 to 1,190.6) | 1,002.7<br>(960.0 to 1,050.1)   | 1,048.3<br>(1,003.2 to 1,093.3) | 933.4<br>(893.1 to 973.4)     | 790.0<br>(720.2 to 869.4)     |
| Kyrgyzstan                  | 1,382.9<br>(1,094.8 to 2,091.4) | 1,352.9<br>(1,336.4 to 1,728.5) | 1,352.9<br>(1,278.2 to 1,657.8) | 1,352.9<br>(1,194.4 to 1,505.8) | 1,352.9<br>(1,115.7 to 1,371.5) | 1,352.9<br>(1,279.0 to 1,500.6) | 1,352.9<br>(1,268.6 to 1,476.3) | 1,352.9<br>(1,141.8 to 1,336.2) | 1,352.9<br>(985.8 to 1,197.1) | 1,352.9<br>(789.0 to 1,061.2) |
| Mongolia                    | 1,483.4<br>(1,318.9 to 1,660.6) | 1,365.8<br>(1,236.1 to 1,504.8) | 1,282.9<br>(1,095.4 to 1,338.2) | 1,108.8<br>(971.2 to 1,184.2)   | 1,108.8<br>(956.2 to 1,146.4)   | 1,108.8<br>(1,019.2 to 1,246.7) | 1,084.9<br>(1,023.2 to 1,255.0) | 995.8<br>(994.6 to 1,218.1)     | 888.1<br>(816.9 to 1,037.9)   | 790.0<br>(698.1 to 851.5)     |
| Tajikistan                  | 1,407.8<br>(1,265.3 to 1,563.9) | 1,282.9<br>(1,170.3 to 1,407.7) | 1,282.9<br>(1,096.0 to 1,245.2) | 1,108.8<br>(1,059.8 to 1,159.6) | 1,108.8<br>(1,064.3 to 1,141.9) | 1,108.8<br>(1,113.0 to 1,194.9) | 1,084.9<br>(1,042.9 to 1,128.3) | 995.8<br>(954.0 to 1,038.8)     | 888.1<br>(850.9 to 930.8)     | 790.0<br>(737.8 to 850.2)     |
| Turkmenistan                | 1,649.9<br>(1,019.5 to 1,353.4) | 1,080.9<br>(929.1 to 1,264.0)   | 1,080.9<br>(905.4 to 1,121.0)   | 953.5<br>(885.3 to 1,023.7)     | 953.5<br>(897.9 to 1,014.2)     | 1,117.4<br>(1,049.7 to 1,186.8) | 1,130.8<br>(1,059.1 to 1,196.5) | 1,130.8<br>(1,053.4 to 1,211.0) | 983.7<br>(927.0 to 1,036.6)   | 889.1<br>(786.6 to 999.8)     |
| Uzbekistan                  | 1,382.9<br>(1,169.8 to 2,091.4) | 1,352.9<br>(1,336.4 to 1,728.5) | 1,352.9<br>(1,278.2 to 1,657.8) | 1,352.9<br>(1,194.4 to 1,505.8) | 1,352.9<br>(1,115.7 to 1,371.5) | 1,352.9<br>(1,279.0 to 1,500.6) | 1,352.9<br>(1,268.6 to 1,476.3) | 1,352.9<br>(1,141.8 to 1,336.2) | 1,352.9<br>(985.8 to 1,197.1) | 1,352.9<br>(789.0 to 1,061.2) |
| Latin America and Caribbean | 1,192.5<br>(1,120.2 to 1,271.8) | 1,061.7<br>(1,039.2 to 1,084.7) | 911.8<br>(895.9 to 929.4)       | 863.4<br>(847.8 to 879.6)       | 750.3<br>(738.9 to 762.0)       | 708.7<br>(696.5 to 720.9)       | 635.5<br>(624.2 to 647.5)       | 577.0<br>(568.2 to 589.7)       | 541.4<br>(565.0 to 589.7)     | 514.0<br>(520.1 to 562.3)     |
| Central Latin America       | 950.2<br>(922.1 to 978.6)       | 980.8<br>(950.0 to 1,013.9)     | 889.0<br>(849.0 to 922.0)       | 893.5<br>(851.8 to 933.3)       | 731.8<br>(708.0 to 758.1)       | 703.1<br>(681.8 to 726.5)       | 649.0<br>(627.7 to 669.9)       | 607.0<br>(588.4 to 625.9)       | 554.8<br>(536.2 to 574.1)     | 483.6<br>(437.5 to 532.3)     |
| Colombia                    | 979.0<br>(941.9 to 1,016.8)     | 834.8<br>(801.9 to 871.4)       | 682.3<br>(653.6 to 714.6)       | 623.7<br>(597.7 to 650.6)       | 585.4<br>(559.5 to 612.2)       | 553.2<br>(529.4 to 575.9)       | 506.3<br>(485.7 to 527.1)       | 446.8<br>(428.4 to 466.4)       | 403.3<br>(385.6 to 423.2)     | 382.3<br>(349.1 to 416.7)     |
| Costa Rica                  | 1,272.2<br>(1,207.4 to 1,333.2) | 1,109.4<br>(1,053.6 to 1,160.8) | 1,109.4<br>(909.0 to 1,017.6)   | 959.3<br>(891.6 to 987.6)       | 937.4<br>(785.4 to 861.5)       | 824.0<br>(728.1 to 800.0)       | 768.3<br>(634.5 to 695.4)       | 648.3<br>(618.3 to 677.1)       | 599.0<br>(569.6 to 632.7)     | 569.9<br>(502.0 to 642.3)     |
| El Salvador                 | 1,361.7<br>(1,641.3 to 2,105.1) | 1,503.3<br>(1,324.1 to 1,696.8) | 1,503.3<br>(1,134.8 to 1,460.2) | 1,241.4<br>(1,098.2 to 1,382.7) | 1,122.6<br>(998.0 to 1,251.3)   | 1,122.6<br>(857.3 to 1,100.0)   | 789.4<br>(731.3 to 987.6)       | 789.4<br>(685.1 to 903.1)       | 736.2<br>(626.4 to 855.1)     | 678.2<br>(504.9 to 888.6)     |
| Guatemala                   | 1,510.9<br>(1,347.9 to 1,676.8) | 1,213.3<br>(1,166.5 to 1,487.1) | 1,213.3<br>(1,077.6 to 1,366.6) | 1,213.3<br>(1,166.4 to 1,435.4) | 1,213.3<br>(1,086.4 to 1,340.2) | 1,213.3<br>(997.9 to 1,276.6)   | 1,059.6<br>(871.8 to 1,272.1)   | 995.9<br>(761.0 to 1,272.8)     | 931.4<br>(666.3 to 1,177.6)   | 870.1<br>(630.2 to 1,102.8)   |
| Honduras                    | 1,229.1<br>(1,179.5 to 1,277.7) | 1,057.2<br>(1,025.0 to 1,093.1) | 1,057.2<br>(871.7 to 911.8)     | 891.1<br>(805.9 to 838.8)       | 821.7<br>(706.4 to 731.3)       | 718.7<br>(671.8 to 695.8)       | 611.2<br>(600.4 to 623.3)       | 600.0<br>(588.1 to 612.0)       | 582.2<br>(570.6 to 595.1)     | 557.7<br>(539.7 to 575.9)     |
| Mexico                      | 1,272.2<br>(1,195.2 to 1,357.0) | 916.2<br>(880.7 to 953.7)       | 853.1<br>(775.0 to 932.1)       | 837.4<br>(805.8 to 941.2)       | 837.4<br>(565.8 to 615.1)       | 837.4<br>(573.1 to 634.4)       | 603.9<br>(529.9 to 578.9)       | 554.2<br>(490.4 to 532.7)       | 514.8<br>(490.4 to 532.7)     | 472.6<br>(390.4 to 562.4)     |
| Nicaragua                   | 1,000.6<br>(932.2 to 1,072.5)   | 808.6<br>(757.7 to 864.7)       | 676.4<br>(627.1 to 724.9)       | 650.9<br>(605.4 to 702.1)       | 618.5<br>(573.3 to 663.7)       | 573.1<br>(535.3 to 617.9)       | 521.6<br>(488.0 to 561.5)       | 500.2<br>(460.7 to 536.3)       | 471.3<br>(436.9 to 506.4)     | 431.6<br>(372.7 to 497.1)     |
| Panama                      | 1,150.9<br>(1,085.2 to 1,224.4) | 1,092.4<br>(1,023.8 to 1,165.6) | 925.6<br>(871.4 to 985.2)       | 811.7<br>(760.1 to 868.4)       | 744.3<br>(694.3 to 794.3)       | 695.5<br>(634.0 to 759.5)       | 608.2<br>(568.0 to 652.2)       | 564.6<br>(527.5 to 604.0)       | 537.6<br>(501.7 to 579.7)     | 524.7<br>(438.5 to 632.9)     |
| Venezuela                   | 1,624.0<br>(1,404.9 to 1,862.4) | 1,201.3<br>(1,152.9 to 1,254.5) | 1,116.6<br>(1,069.2 to 1,164.8) | 1,036.6<br>(991.7 to 1,082.5)   | 899.0<br>(859.0 to 937.2)       | 809.7<br>(783.5 to 831.4)       | 689.3<br>(662.7 to 718.0)       | 607.3<br>(576.7 to 638.8)       | 525.1<br>(547.6 to 616.7)     | 525.1<br>(465.7 to 593.6)     |
| Andean Latin America        | 1,845.1<br>(1,691.1 to 2,019.7) | 1,693.7<br>(1,565.3 to 1,852.5) | 1,693.7<br>(1,444.2 to 1,722.5) | 1,373.3<br>(1,360.7 to 1,655.0) | 1,373.3<br>(1,253.5 to 1,523.6) | 1,373.3<br>(1,126.1 to 1,354.0) | 999.7<br>(938.7 to 1,067.8)     | 999.7<br>(826.7 to 990.9)       | 797.9<br>(726.3 to 1,038.2)   | 797.9<br>(649.2 to 1,004.9)   |
| Bolivia                     | 1,045.6<br>(1,000.2 to 1,092.3) | 1,003.7<br>(962.2 to 1,048.5)   | 1,003.7<br>(871.3 to 953.9)     | 821.4<br>(784.7 to 859.6)       | 751.8<br>(720.2 to 783.0)       | 692.5<br>(662.5 to 721.0)       | 621.6<br>(593.5 to 651.0)       | 562.4<br>(538.1 to 587.3)       | 495.1<br>(509.7 to 558.8)     | 451.5<br>(456.2 to 537.3)     |
| Ecuador                     | 1,851.9<br>(1,442.0 to 2,288.7) | 1,333.0<br>(1,053.9 to 1,221.3) | 1,071.9<br>(1,003.9 to 1,145.6) | 994.5<br>(934.5 to 1,058.4)     | 918.0<br>(761.5 to 873.0)       | 818.0<br>(736.3 to 853.0)       | 622.1<br>(579.2 to 671.6)       | 622.1<br>(490.5 to 590.1)       | 453.7<br>(466.3 to 561.6)     | 453.7<br>(361.5 to 561.6)     |
| Peru                        | 1,194.8<br>(1,123.6 to 1,258.7) | 1,114.8<br>(1,050.0 to 1,177.5) | 1,031.1<br>(980.5 to 1,086.0)   | 986.2<br>(948.0 to 1,026.7)     | 925.2<br>(924.5 to 993.7)       | 851.8<br>(881.5 to 944.8)       | 813.4<br>(812.7 to 777.5)       | 757.2<br>(773.3 to 852.5)       | 697.2<br>(547.6 to 756.9)     | 697.2<br>(614.7 to 746.5)     |
| Caribbean                   | 1,282.5<br>(1,167.7 to 1,401.1) | 1,141.6<br>(1,040.6 to 1,246.7) | 938.6<br>(836.8 to 1,042.1)     | 828.8<br>(647.6 to 784.7)       | 712.7<br>(596.1 to 714.9)       | 653.5<br>(596.1 to 714.9)       | 630.2<br>(574.7 to 689.0)       | 598.8<br>(493.9 to 614.1)       | 549.0<br>(463.8 to 615.1)     | 538.1<br>(463.8 to 615.1)     |
| Antigua and Barbuda         | 1,221.1<br>(1,137.8 to 1,350.0) | 1,088.3<br>(1,031.9 to 1,153.5) | 1,008.2<br>(958.2 to 1,062.9)   | 888.7<br>(842.1 to 939.3)       | 810.8<br>(772.6 to 850.0)       | 807.0<br>(770.2 to 843.4)       | 792.5<br>(759.3 to 831.1)       | 727.8<br>(686.8 to 765.1)       | 698.7<br>(648.7 to 747.0)     | 718.7<br>(625.8 to 817.6)     |
| The Bahamas                 | 991.6<br>(926.6 to 1,059.7)     | 907.3<br>(848.8 to 961.0)       | 802.4<br>(749.7 to 853.8)       | 749.7<br>(701.0 to 804.6)       | 734.7<br>(684.8 to 784.9)       | 713.6<br>(657.6 to 772.5)       | 636.3<br>(588.9 to 688.4)       | 597.6<br>(556.9 to 639.0)       | 558.8<br>(518.3 to 600.4)     | 584.9<br>(523.1 to 650.0)     |
| Barbados                    | 1,004.2<br>(923.6 to 1,075.4)   | 924.4<br>(854.0 to 989.7)       | 824.4<br>(810.4 to 1,000.4)     | 824.4<br>(760.8 to 932.7)       | 794.3<br>(719.0 to 876.6)       | 794.3<br>(739.9 to 859.8)       | 794.3<br>(882.2 to 993.9)       | 794.3<br>(852.7 to 946.5)       | 794.3<br>(761.2 to 839.0)     | 794.3<br>(696.4 to 923.9)     |
| Belize                      | 1,400.2<br>(1,294.3 to 1,510.6) | 1,263.1<br>(1,175.7 to 1,361.7) | 1,167.7<br>(1,078.9 to 1,264.7) | 1,062.0<br>(974.8 to 1,156.9)   | 1,079.5<br>(983.5 to 1,172.8)   | 1,021.9<br>(935.4 to 1,113.3)   | 948.9<br>(870.4 to 1,026.4)     | 755.3<br>(690.6 to 831.2)       | 581.9<br>(527.5 to 643.0)     | 451.9<br>(362.1 to 536.1)     |
| Bermuda                     | 893.2<br>(859.4 to 929.9)       | 796.6<br>(764.1 to 831.4)       | 705.0<br>(675.5 to 736.0)       | 670.7<br>(638.5 to 703.7)       | 671.8<br>(641.6 to 702.2)       | 671.8<br>(619.4 to 681.3)       | 648.3<br>(560.5 to 615.2)       | 586.2<br>(526.2 to 576.3)       | 517.2<br>(493.6 to 540.7)     | 483.4<br>(438.5 to 528.2)     |
| Cuba                        | 1,364.3<br>(1,265.6 to 1,452.5) | 1,187.8<br>(1,093.6 to 1,280.8) | 1,187.8<br>(867.1 to 1,015.8)   | 902.6<br>(830.5 to 971.6)       | 818.0<br>(881.3 to 1,027.0)     | 786.7<br>(875.3 to 1,011.1)     | 622.1<br>(728.9 to 883.7)       | 622.1<br>(703.6 to 846.2)       | 453.7<br>(510.6 to 834.6)     | 453.7<br>(654.2 to 862.5)     |
| Dominica                    | 1,039.7<br>(925.2 to 1,113.1)   | 933.7<br>(851.9 to 1,009.5)     | 853.1<br>(775.6 to 933.1)       | 853.1                           |                                 |                                 |                                 |                                 |                               |                               |

Appendix Table 19C. Age-standardized mortality rates, females, 1970, 1975, 1980, 1985, 1990, 1995, 2000, 2005, 2010, 2016

| Location                       | 1970                                       | 1975                                       | 1980                                       | 1985                                   | 1990                                   | 1995                                   | 2000                                 | 2005                                 | 2010                                 | 2016                                 |
|--------------------------------|--------------------------------------------|--------------------------------------------|--------------------------------------------|----------------------------------------|----------------------------------------|----------------------------------------|--------------------------------------|--------------------------------------|--------------------------------------|--------------------------------------|
| Laos                           | 2,519.7<br>(2,296.3 to 2,804.0)            | 2,331.5<br>(1,131.8 to 2,528.8)            | 2,195.5<br>(2,066.1 to 2,332.3)            | 2,017.7<br>(1,921.0 to 2,117.1)        | 1,887.8<br>(1,800.9 to 1,976.0)        | 1,759.2<br>(1,673.6 to 1,845.4)        | 1,593.3<br>(1,510.6 to 1,673.6)      | 1,392.8<br>(1,320.6 to 1,474.0)      | 1,206.7<br>(1,134.6 to 1,282.1)      | 1,031.5<br>(954.1 to 1,107.1)        |
| Malaysia                       | 1,282.1<br>(1,243.2 to 1,323.1)            | 1,131.8<br>(1,093.1 to 1,168.7)            | 1,041.8<br>(997.8 to 1,077.2)              | 960.1<br>(931.2 to 990.4)              | 921.8<br>(897.0 to 945.2)              | 872.5<br>(875.9 to 917.8)              | 864.5<br>(844.0 to 886.8)            | 870.0<br>(851.5 to 889.8)            | 835.6<br>(811.8 to 861.2)            | 699.6<br>(667.3 to 735.2)            |
| Maldives                       | 2,504.6<br>(2,061.9 to 3,080.2)            | 2,295.3<br>(1,866.6 to 2,819.1)            | 2,158.0<br>(1,796.8 to 2,561.8)            | 1,812.5<br>(1,683.5 to 1,971.9)        | 1,449.8<br>(1,335.5 to 1,556.6)        | 1,180.9<br>(1,056.7 to 1,318.6)        | 955.5<br>(872.2 to 1,039.9)          | 725.2<br>(662.0 to 793.6)            | 580.6<br>(526.6 to 639.0)            | 493.1<br>(380.2 to 636.1)            |
| Mauritius                      | 1,495.1<br>(1,437.2 to 1,557.4)            | 1,323.1<br>(1,274.9 to 1,379.9)            | 1,123.2<br>(1,069.9 to 1,173.6)            | 1,054.3<br>(1,011.9 to 1,100.3)        | 922.8<br>(883.7 to 963.2)              | 847.5<br>(812.7 to 885.7)              | 829.5<br>(793.8 to 867.7)            | 778.7<br>(746.7 to 816.7)            | 695.4<br>(666.6 to 728.5)            | 650.9<br>(630.5 to 757.1)            |
| Myanmar                        | 2,178.9<br>(2,022.3 to 2,338.3)            | 1,930.9<br>(1,798.4 to 2,066.8)            | 1,778.2<br>(1,665.1 to 1,885.6)            | 1,669.4<br>(1,563.6 to 1,769.2)        | 1,600.3<br>(1,494.6 to 1,695.3)        | 1,531.5<br>(1,441.4 to 1,626.7)        | 1,420.1<br>(1,340.3 to 1,505.2)      | 1,256.8<br>(1,176.4 to 1,338.1)      | 1,068.6<br>(999.5 to 1,146.5)        | 888.9<br>(832.5 to 943.4)            |
| Philippines                    | 1,058.2<br>(1,004.8 to 1,116.3)            | 1,079.9<br>(1,025.3 to 1,139.3)            | 1,035.0<br>(982.7 to 1,089.8)              | 1,028.6<br>(977.9 to 1,079.9)          | 964.9<br>(916.3 to 1,012.9)            | 939.3<br>(891.2 to 987.3)              | 964.5<br>(911.6 to 1,019.3)          | 987.2<br>(934.9 to 1,047.6)          | 968.7<br>(912.7 to 1,029.6)          | 898.2<br>(771.1 to 1,034.3)          |
| Sri Lanka                      | 1,342.0<br>(1,263.1 to 1,417.1)            | 1,310.4<br>(1,237.3 to 1,382.6)            | 1,034.7<br>(972.0 to 1,104.1)              | 898.0<br>(844.2 to 950.5)              | 748.7<br>(697.3 to 799.8)              | 704.7<br>(651.0 to 762.1)              | 669.8<br>(621.0 to 718.6)            | 612.7<br>(566.3 to 673.3)            | 604.5<br>(546.6 to 674.9)            | 493.0<br>(381.0 to 614.2)            |
| Seychelles                     | 1,096.2<br>(982.0 to 1,249.6)              | 943.7<br>(868.2 to 1,065.8)                | 875.4<br>(747.0 to 924.5)                  | 910.9<br>(853.9 to 954.1)              | 853.0<br>(814.4 to 889.2)              | 786.6<br>(726.2 to 807.9)              | 771.5<br>(703.2 to 793.3)            | 756.0<br>(703.2 to 793.3)            | 689.7<br>(648.6 to 744.0)            | 675.9<br>(604.1 to 751.6)            |
| Thailand                       | 1,145.6<br>(1,099.5 to 1,195.7)            | 1,006.1<br>(960.5 to 1,048.6)              | 947.6<br>(906.7 to 990.8)                  | 874.1<br>(834.6 to 911.9)              | 814.9<br>(759.5 to 830.8)              | 763.3<br>(722.6 to 800.5)              | 722.1<br>(683.7 to 760.6)            | 651.4<br>(622.4 to 682.7)            | 547.2<br>(519.5 to 576.9)            | 492.8<br>(446.1 to 550.1)            |
| Timor-Leste                    | 1,687.5<br>(2,159.3 to 3,025.7)            | 1,231.5<br>(2,084.1 to 2,907.9)            | 1,068.7<br>(1,857.4 to 2,599.4)            | 986.9<br>(1,549.9 to 2,171.7)          | 911.2<br>(1,384.6 to 1,918.0)          | 845.6<br>(1,272.0 to 1,672.7)          | 790.4<br>(1,150.5 to 1,473.8)        | 704.0<br>(970.8 to 1,284.2)          | 639.9<br>(777.6 to 1,080.6)          | 639.9<br>(679.8 to 1,035.6)          |
| Vietnam                        | 1,330.3 to 1,892.1<br>(1,368.6 to 1,779.2) | 1,146.2 to 1,542.0<br>(1,178.2 to 1,756.4) | 1,030.0 to 1,367.8<br>(1,075.6 to 1,424.2) | 925.6 to 1,231.1<br>(975.6 to 1,311.1) | 853.7 to 1,119.8<br>(903.7 to 1,119.8) | 761.1 to 1,038.8<br>(813.7 to 1,119.8) | 695.3 to 943.0<br>(746.6 to 1,038.8) | 649.1 to 881.3<br>(703.8 to 1,038.8) | 620.2 to 811.7<br>(678.4 to 1,038.8) | 596.5 to 715.8<br>(648.2 to 1,038.8) |
| Oceania                        | 1,108.1<br>(1,009.1 to 1,207.4)            | 951.1<br>(853.3 to 1,058.1)                | 918.3<br>(807.9 to 1,060.8)                | 910.7<br>(728.3 to 883.5)              | 807.7<br>(767.4 to 973.5)              | 853.2<br>(767.4 to 973.5)              | 850.2<br>(769.6 to 956.6)            | 846.8<br>(769.6 to 956.6)            | 834.2<br>(735.4 to 943.0)            | 861.2<br>(702.7 to 1,037.1)          |
| Federated States of Micronesia | 1,606.7<br>(1,400.7 to 1,822.7)            | 1,549.1<br>(1,360.1 to 1,754.1)            | 1,481.7<br>(1,306.6 to 1,669.6)            | 1,446.4<br>(1,275.0 to 1,634.0)        | 1,412.7<br>(1,240.6 to 1,620.8)        | 1,368.0<br>(1,198.8 to 1,574.5)        | 1,346.3<br>(1,154.0 to 1,562.0)      | 1,363.7<br>(1,139.0 to 1,643.8)      | 1,371.8<br>(1,139.1 to 1,668.0)      | 1,357.8<br>(1,108.9 to 1,645.0)      |
| Fiji                           | 1,261.3<br>(1,113.5 to 1,386.5)            | 1,257.8<br>(1,125.2 to 1,383.8)            | 1,243.6<br>(1,106.7 to 1,393.3)            | 1,189.3<br>(1,054.6 to 1,346.1)        | 1,261.3<br>(949.6 to 1,661.3)          | 1,328.6<br>(1,061.0 to 1,624.8)        | 1,354.0<br>(1,166.8 to 1,567.5)      | 1,309.9<br>(1,142.5 to 1,499.9)      | 1,289.4<br>(1,112.7 to 1,531.6)      | 1,255.9<br>(945.3 to 1,628.2)        |
| Guam                           | 1,786.8<br>(956.9 to 1,136.3)              | 1,621.6<br>(876.0 to 1,041.3)              | 1,621.6<br>(734.4 to 860.2)                | 1,678.9<br>(651.7 to 796.9)            | 1,688.2<br>(661.6 to 795.9)            | 1,637.6<br>(656.7 to 789.4)            | 1,553.9<br>(633.6 to 753.2)          | 1,488.9<br>(649.2 to 768.0)          | 1,453.1<br>(695.0 to 841.1)          | 1,351.5<br>(639.1 to 851.7)          |
| Kiribati                       | 1,391.4<br>(1,140.4 to 1,682.7)            | 1,271.6<br>(1,058.5 to 1,512.3)            | 1,185.6<br>(1,003.8 to 1,362.1)            | 1,226.2<br>(1,022.6 to 1,280.9)        | 1,321.4<br>(1,137.6 to 1,315.4)        | 1,437.6<br>(1,221.8 to 1,427.5)        | 1,508.4<br>(1,315.6 to 1,578.8)      | 1,637.6<br>(1,347.1 to 1,674.3)      | 1,747.2<br>(1,260.9 to 1,697.3)      | 1,837.0<br>(1,128.6 to 1,650.9)      |
| Marshall Islands               | 1,133.4<br>(893.4 to 1,412.6)              | 1,026.8<br>(801.2 to 1,296.8)              | 948.9<br>(751.8 to 1,207.4)                | 916.2<br>(736.3 to 1,153.9)            | 849.8<br>(679.5 to 1,041.8)            | 747.3<br>(618.0 to 910.2)              | 693.3<br>(571.6 to 837.1)            | 683.5<br>(568.0 to 818.3)            | 686.7<br>(572.9 to 831.3)            | 700.0<br>(560.9 to 858.0)            |
| Northern Mariana Islands       | 2,085.9<br>(1,784.9 to 2,286.4)            | 1,986.7<br>(1,739.6 to 2,221.5)            | 1,963.5<br>(1,758.5 to 2,240.0)            | 1,929.2<br>(1,783.9 to 2,269.6)        | 1,929.2<br>(1,779.7 to 2,257.4)        | 1,929.2<br>(1,743.9 to 2,218.4)        | 1,929.2<br>(1,705.0 to 2,196.0)      | 1,929.2<br>(1,729.5 to 2,245.5)      | 1,929.2<br>(1,729.5 to 2,245.5)      | 1,929.2<br>(1,491.6 to 1,984.8)      |
| Papua New Guinea               | 1,209.9<br>(1,100.2 to 1,293.9)            | 1,168.8<br>(1,079.6 to 1,251.5)            | 1,049.1<br>(959.2 to 1,137.7)              | 1,006.5<br>(896.7 to 1,108.8)          | 965.4<br>(846.2 to 1,094.1)            | 945.6<br>(821.2 to 1,086.9)            | 926.0<br>(788.5 to 1,068.0)          | 901.1<br>(786.3 to 1,024.2)          | 880.5<br>(786.3 to 1,024.2)          | 880.5<br>(746.7 to 1,025.3)          |
| Samoa                          | 2,043.4<br>(1,798.8 to 2,305.6)            | 2,042.1<br>(1,795.3 to 2,298.4)            | 1,816.7<br>(1,587.0 to 2,087.4)            | 1,790.2<br>(1,559.9 to 2,058.9)        | 1,798.9<br>(1,556.3 to 2,042.3)        | 1,757.4<br>(1,531.4 to 2,008.6)        | 1,745.0<br>(1,523.5 to 1,972.6)      | 1,758.0<br>(1,563.3 to 2,072.7)      | 1,758.0<br>(1,510.0 to 2,050.9)      | 1,640.4<br>(1,391.9 to 1,933.7)      |
| Solomon Islands                | 1,290.2<br>(1,101.8 to 1,493.8)            | 1,251.7<br>(1,066.3 to 1,459.8)            | 1,266.3<br>(1,075.0 to 1,498.9)            | 1,206.1<br>(1,012.4 to 1,441.4)        | 1,119.3<br>(940.3 to 1,313.7)          | 1,119.3<br>(918.1 to 1,258.5)          | 1,053.3<br>(904.5 to 1,209.2)        | 973.3<br>(844.8 to 1,108.3)          | 941.1<br>(809.7 to 1,095.9)          | 907.4<br>(766.8 to 1,075.9)          |
| Tonga                          | 1,832.2<br>(1,625.9 to 2,096.3)            | 1,738.7<br>(1,528.0 to 1,969.4)            | 1,646.8<br>(1,458.3 to 1,862.6)            | 1,546.7<br>(1,419.4 to 1,827.1)        | 1,468.8<br>(1,403.1 to 1,806.1)        | 1,397.6<br>(1,386.6 to 1,792.0)        | 1,359.6<br>(1,393.0 to 1,788.1)      | 1,359.6<br>(1,385.5 to 1,856.4)      | 1,359.6<br>(1,325.5 to 1,828.2)      | 1,359.6<br>(1,255.2 to 1,759.2)      |
| Vanuatu                        | 1,475.4<br>(1,420.4 to 1,536.1)            | 1,317.2<br>(1,275.7 to 1,359.4)            | 1,102.9<br>(1,155.6 to 1,224.3)            | 986.6<br>(1,065.8 to 1,137.5)          | 906.6<br>(960.0 to 1,013.5)            | 818.8<br>(935.4 to 980.6)              | 781.8<br>(859.2 to 904.5)            | 781.8<br>(812.6 to 869.6)            | 781.8<br>(750.4 to 809.4)            | 781.8<br>(678.7 to 751.1)            |
| North Africa and Middle East   | 2,608.3<br>(2,386.9 to 2,829.1)            | 2,630.5<br>(2,438.3 to 2,817.0)            | 2,761.4<br>(2,542.9 to 2,988.7)            | 2,767.3<br>(2,424.9 to 3,129.7)        | 2,317.0<br>(2,137.1 to 2,499.9)        | 2,400.7<br>(2,228.1 to 2,589.1)        | 2,411.8<br>(2,233.4 to 2,576.9)      | 2,283.4<br>(2,099.4 to 2,465.5)      | 2,099.6<br>(1,940.7 to 2,280.1)      | 1,919.1<br>(1,761.8 to 2,091.9)      |
| Afghanistan                    | 1,403.3<br>(1,302.3 to 1,497.7)            | 1,358.7<br>(1,263.4 to 1,488.3)            | 1,292.1<br>(1,206.4 to 1,385.6)            | 1,292.1<br>(884.6 to 1,009.6)          | 945.7<br>(828.6 to 1,029.6)            | 846.7<br>(788.4 to 925.7)              | 789.3<br>(728.4 to 873.6)            | 731.0<br>(670.9 to 810.1)            | 676.6<br>(613.1 to 668.3)            | 610.5<br>(570.6 to 654.0)            |
| Algeria                        | 1,136.0<br>(951.3 to 1,377.7)              | 1,050.6<br>(848.7 to 1,294.5)              | 908.6<br>(766.4 to 1,088.2)                | 959.0<br>(825.6 to 1,101.6)            | 1,148.9<br>(1,005.0 to 1,320.9)        | 1,169.0<br>(1,006.9 to 1,345.1)        | 1,014.0<br>(890.0 to 1,164.0)        | 914.9<br>(792.6 to 1,040.8)          | 782.3<br>(679.8 to 884.4)            | 698.6<br>(562.7 to 843.1)            |
| Bahrain                        | 1,731.0<br>(1,650.9 to 1,810.8)            | 1,512.9<br>(1,441.9 to 1,581.8)            | 1,311.7<br>(1,245.7 to 1,386.5)            | 1,306.1<br>(1,237.7 to 1,374.7)        | 1,090.4<br>(1,036.1 to 1,147.7)        | 976.1<br>(925.8 to 1,031.8)            | 851.7<br>(807.4 to 903.5)            | 860.1<br>(812.0 to 910.4)            | 874.6<br>(827.3 to 930.4)            | 777.9<br>(665.3 to 894.2)            |
| Egypt                          | 1,259.7<br>(1,098.8 to 1,437.6)            | 990.7<br>(828.7 to 1,084.3)                | 863.3<br>(760.4 to 964.4)                  | 809.1<br>(704.1 to 918.0)              | 876.1<br>(758.5 to 997.2)              | 795.3<br>(695.1 to 908.3)              | 797.7<br>(704.1 to 904.0)            | 818.3<br>(686.0 to 944.3)            | 755.3<br>(650.9 to 856.3)            | 628.1<br>(512.4 to 733.2)            |
| Iran                           | 1,261.1<br>(1,184.9 to 1,360.3)            | 1,295.7<br>(1,170.4 to 1,452.0)            | 1,295.7<br>(1,088.0 to 1,501.5)            | 1,295.7<br>(1,109.0 to 1,605.5)        | 1,295.7<br>(1,056.9 to 1,389.6)        | 1,295.7<br>(1,173.1 to 1,409.6)        | 1,295.7<br>(1,138.8 to 1,364.7)      | 1,295.7<br>(1,095.9 to 1,411.7)      | 1,295.7<br>(965.2 to 1,333.9)        | 1,295.7<br>(848.3 to 1,277.9)        |
| Iraq                           | 1,218.9<br>(1,084.8 to 1,399.3)            | 1,092.7<br>(973.3 to 1,264.4)              | 1,092.7<br>(912.4 to 1,270.2)              | 1,044.8<br>(896.4 to 1,164.6)          | 908.9<br>(760.0 to 1,030.4)            | 862.1<br>(719.6 to 1,005.7)            | 870.1<br>(715.5 to 1,035.4)          | 870.1<br>(727.4 to 1,093.3)          | 870.1<br>(545.6 to 855.5)            | 870.1<br>(483.1 to 807.2)            |
| Jordan                         | 925.3<br>(813.5 to 1,046.0)                | 887.4<br>(794.8 to 1,021.1)                | 887.4<br>(770.2 to 993.6)                  | 887.4<br>(733.3 to 965.1)              | 840.0<br>(603.8 to 849.0)              | 719.4<br>(657.2 to 848.8)              | 746.5<br>(661.7 to 870.1)            | 746.5<br>(636.3 to 851.6)            | 746.5<br>(636.0 to 833.7)            | 746.5<br>(438.6 to 827.1)            |
| Kuwait                         | 1,087.6<br>(878.8 to 1,383.4)              | 1,224.2<br>(950.1 to 1,560.3)              | 1,431.1<br>(1,029.8 to 1,873.6)            | 1,431.1<br>(839.8 to 1,271.3)          | 1,015.2<br>(781.9 to 1,054.4)          | 829.9<br>(697.9 to 932.2)              | 601.9<br>(616.8 to 787.0)            | 514.2<br>(539.8 to 630.9)            | 454.2<br>(458.7 to 574.8)            | 454.2<br>(416.8 to 554.8)            |
| Lebanon                        | 976.3<br>(883.5 to 1,065.2)                | 871.3<br>(791.5 to 944.6)                  | 785.2<br>(709.0 to 854.3)                  | 757.4<br>(683.5 to 816.4)              | 756.4<br>(700.3 to 838.9)              | 732.1<br>(671.5 to 826.3)              | 735.0<br>(663.0 to 841.0)            | 692.8<br>(600.7 to 802.9)            | 639.2<br>(600.7 to 721.0)            | 653.2<br>(600.7 to 722.8)            |
| Libya                          | 1,506.4<br>(1,437.4 to 1,593.7)            | 1,402.0<br>(1,337.9 to 1,482.7)            | 1,281.2<br>(1,216.6 to 1,356.9)            | 1,119.9<br>(1,068.7 to 1,191.8)        | 1,040.9<br>(972.1 to 1,122.2)          | 980.4<br>(912.8 to 1,076.2)            | 888.0<br>(830.8 to 968.1)            | 837.8<br>(769.0 to 931.3)            | 785.0<br>(692.2 to 865.0)            | 707.3<br>(636.0 to 790.1)            |
| Morocco                        | 1,226.9<br>(1,052.0 to 1,518.1)            | 1,067.2<br>(886.5 to 1,323.3)              | 981.8<br>(826.5 to 1,194.7)                | 963.7<br>(815.0 to 1,179.8)            | 972.0<br>(836.5 to 1,137.6)            | 962.6<br>(865.9 to 1,069.3)            | 966.4<br>(925.0 to 1,008.7)          | 904.8<br>(881.5 to 928.8)            | 978.7<br>(953.3 to 1,001.6)          | 1,063.3<br>(994.9 to 1,124.1)        |
| Palestine                      | 1,725.2<br>(1,598.9 to 1,857.7)            | 1,457.2<br>(1,346.8 to 1,564.8)            | 1,212.1<br>(1,124.1 to 1,295.2)            | 1,093.3<br>(933.6 to 1,070.9)          | 893.3<br>(815.5 to 986.8)              | 829.7<br>(731.6 to 919.5)              | 734.7<br>(657.9 to 789.3)            | 635.5<br>(583.0 to 678.3)            | 635.5<br>(580.9 to 704.7)            | 635.5<br>(512.7 to 584.8)            |
| Oman                           | 941.1<br>(694.7 to 1,251.2)                | 866.9<br>(642.9 to 1,142.5)                | 788.0<br>(621.8 to 1,031.4)                | 834.8<br>(671.3 to 987.5)              | 783.8<br>(635.8 to 913.9)              | 786.1<br>(646.0 to 904.2)              | 730.6<br>(617.1 to 847.6)            | 627.2<br>(545.7 to 707.9)            | 511.6<br>(413.4 to 602.7)            | 467.2<br>(329.3 to 601.8)            |
| Qatar                          | 946.6<br>(838.4 to 1,058.2)                | 818.3<br>(728.9 to 913.8)                  | 818.3<br>(692.6 to 859.2)                  | 823.3<br>(723.7 to 883.1)              | 823.3<br>(772.9 to 938.9)              | 823.3<br>(827.5 to 989.5)              | 823.3<br>(952.8 to 1,077.4)          | 823.3<br>(904.2 to 995.4)            | 823.3<br>(805.4 to 903.3)            | 823.3<br>(607.6 to 719.3)            |
| Saudi Arabia                   | 1,774.0<br>(1,686.5 to 1,878.3)            | 1,756.9<br>(1,666.6 to 1,847.0)            | 1,756.9<br>(1,574.5 to 1,750.6)            | 1,756.9<br>(1,672.9 to 2,165.7)        | 1,756.9<br>(1,449.0 to 1,611.8)        | 1,756.9<br>(1,373.1 to 1,540.5)        | 1,756.9<br>(1,259.3 to 1,414.5)      | 1,756.9<br>(1,128.3 to 1,273.6)      | 1,756.9<br>(1,019.0 to 1,151.5)      | 1,756.9<br>(905.8 to 1,047.4)        |
| Sudan                          | 1,032.5<br>(966.9 to 1,098.1)              | 1,052.2<br>(889.2 to 1,215.                |                                            |                                        |                                        |                                        |                                      |                                      |                                      |                                      |



Appendix Table 19C. Age-standardized mortality rates, females, 1970, 1975, 1980, 1985, 1990, 1995, 2000, 2005, 2010, 2016

| Location                   | 1970                            | 1975                            | 1980                            | 1985                            | 1990                            | 1995                            | 2000                            | 2005                            | 2010                            | 2016                            |
|----------------------------|---------------------------------|---------------------------------|---------------------------------|---------------------------------|---------------------------------|---------------------------------|---------------------------------|---------------------------------|---------------------------------|---------------------------------|
| Burkina Faso               | 2,158.7<br>(2,091.5 to 2,227.3) | 2,074.0<br>(2,017.7 to 2,135.7) | 1,973.1<br>(1,920.4 to 2,034.9) | 1,895.7<br>(1,839.8 to 1,960.2) | 1,892.6<br>(1,771.6 to 1,983.6) | 1,889.8<br>(1,731.3 to 2,027.4) | 1,825.7<br>(1,696.5 to 1,946.2) | 1,688.7<br>(1,600.6 to 1,781.2) | 1,557.7<br>(1,489.8 to 1,629.9) | 1,429.4<br>(1,358.6 to 1,495.3) |
| Cameroun                   | 1,923.3<br>(1,791.7 to 2,195.4) | 1,891.9<br>(1,703.6 to 2,077.1) | 1,768.0<br>(1,610.4 to 1,939.0) | 1,597.0<br>(1,460.9 to 1,733.6) | 1,502.9<br>(1,374.6 to 1,631.0) | 1,502.9<br>(1,423.3 to 1,768.0) | 1,502.9<br>(1,539.6 to 1,997.4) | 1,754.1<br>(1,529.2 to 1,996.8) | 1,773.8<br>(1,363.2 to 1,845.5) | 1,402.1<br>(1,149.0 to 1,660.9) |
| Cape Verde                 | 1,339.3<br>(1,144.7 to 1,527.0) | 1,185.6<br>(1,034.1 to 1,336.8) | 1,065.6<br>(967.0 to 1,169.8)   | 989.8<br>(928.8 to 1,040.3)     | 874.6<br>(803.5 to 933.1)       | 865.5<br>(748.0 to 966.2)       | 751.9<br>(626.1 to 886.8)       | 680.3<br>(576.5 to 791.4)       | 625.7<br>(549.9 to 678.7)       | 601.6<br>(515.1 to 665.8)       |
| Chad                       | 1,784.8<br>(1,690.5 to 1,986.5) | 1,717.5<br>(1,632.0 to 1,823.3) | 1,736.0<br>(1,650.3 to 1,852.3) | 1,725.7<br>(1,636.4 to 1,825.1) | 1,712.9<br>(1,610.7 to 1,817.7) | 1,712.8<br>(1,607.6 to 1,821.2) | 1,696.4<br>(1,635.1 to 1,915.0) | 1,606.4<br>(1,543.3 to 1,854.0) | 1,563.6<br>(1,426.3 to 1,710.1) | 1,379.2<br>(1,251.4 to 1,534.9) |
| Cote d'Ivoire              | 1,821.9<br>(1,698.9 to 1,962.7) | 1,715.7<br>(1,599.2 to 1,857.4) | 1,628.5<br>(1,520.0 to 1,755.7) | 1,607.6<br>(1,500.4 to 1,720.3) | 1,675.4<br>(1,556.9 to 1,789.5) | 1,675.4<br>(1,648.7 to 1,965.3) | 1,806.6<br>(1,667.8 to 2,103.5) | 1,856.0<br>(1,645.6 to 2,060.2) | 1,695.9<br>(1,508.8 to 1,868.2) | 1,485.2<br>(1,320.4 to 1,636.2) |
| The Gambia                 | 1,643.7<br>(1,468.6 to 1,841.1) | 1,564.6<br>(1,377.0 to 1,765.9) | 1,494.7<br>(1,322.2 to 1,689.3) | 1,440.2<br>(1,283.2 to 1,630.1) | 1,402.6<br>(1,253.6 to 1,573.7) | 1,370.0<br>(1,222.5 to 1,522.7) | 1,314.7<br>(1,164.6 to 1,446.0) | 1,210.9<br>(1,072.0 to 1,360.0) | 1,158.4<br>(1,026.0 to 1,297.3) | 1,074.7<br>(922.3 to 1,199.0)   |
| Ghana                      | 1,767.6<br>(1,527.7 to 1,911.4) | 1,631.6<br>(1,446.7 to 1,820.4) | 1,598.7<br>(1,427.8 to 1,788.4) | 1,602.1<br>(1,435.0 to 1,782.4) | 1,571.5<br>(1,401.4 to 1,738.6) | 1,519.8<br>(1,351.2 to 1,688.5) | 1,525.1<br>(1,326.4 to 1,713.0) | 1,469.6<br>(1,276.0 to 1,652.8) | 1,398.3<br>(1,212.1 to 1,537.9) | 1,183.9<br>(1,012.0 to 1,298.3) |
| Guinea                     | 2,213.7<br>(1,999.3 to 2,474.7) | 2,169.3<br>(1,971.6 to 2,406.4) | 2,068.2<br>(1,890.0 to 2,264.7) | 2,000.5<br>(1,849.1 to 2,183.6) | 1,866.5<br>(1,747.2 to 2,005.4) | 1,866.5<br>(1,683.4 to 1,912.6) | 1,732.4<br>(1,605.1 to 1,875.2) | 1,666.3<br>(1,505.2 to 1,827.4) | 1,597.2<br>(1,402.3 to 1,779.7) | 1,490.4<br>(1,277.6 to 1,684.0) |
| Guinea-Bissau              | 2,397.4<br>(2,105.8 to 2,678.5) | 2,171.8<br>(1,918.8 to 2,404.5) | 2,107.7<br>(1,867.2 to 2,315.5) | 2,099.7<br>(1,872.6 to 2,325.6) | 2,064.9<br>(1,837.2 to 2,267.5) | 2,064.9<br>(1,811.6 to 2,183.1) | 2,000.6<br>(1,780.8 to 2,144.0) | 1,961.9<br>(1,669.5 to 2,110.1) | 1,899.1<br>(1,602.6 to 2,013.1) | 1,600.7<br>(1,430.6 to 1,783.7) |
| Liberia                    | 1,910.4<br>(1,807.2 to 2,034.5) | 1,817.2<br>(1,708.3 to 1,932.5) | 1,758.5<br>(1,658.5 to 1,882.7) | 1,750.2<br>(1,645.2 to 1,883.0) | 1,750.2<br>(1,733.9 to 1,975.6) | 1,905.6<br>(1,776.4 to 2,053.5) | 1,766.6<br>(1,601.0 to 1,920.6) | 1,638.6<br>(1,469.7 to 1,793.8) | 1,540.0<br>(1,398.5 to 1,687.4) | 1,351.9<br>(1,243.9 to 1,448.1) |
| Mali                       | 2,649.2<br>(2,326.2 to 2,982.0) | 2,570.5<br>(2,292.2 to 2,837.5) | 2,497.8<br>(2,129.8 to 2,873.4) | 2,348.2<br>(2,016.2 to 2,659.8) | 2,123.1<br>(1,980.3 to 2,273.4) | 2,123.1<br>(1,868.9 to 2,152.6) | 1,849.8<br>(1,719.4 to 1,998.1) | 1,593.6<br>(1,457.7 to 1,743.5) | 1,409.5<br>(1,274.0 to 1,583.4) | 1,316.4<br>(1,126.1 to 1,559.7) |
| Mauritania                 | 1,845.4<br>(1,482.2 to 2,234.7) | 1,780.6<br>(1,461.7 to 2,159.0) | 1,674.0<br>(1,405.8 to 1,978.1) | 1,630.2<br>(1,427.6 to 1,815.3) | 1,587.6<br>(1,457.3 to 1,736.2) | 1,587.6<br>(1,379.3 to 1,634.7) | 1,460.9<br>(1,250.4 to 1,542.4) | 1,399.3<br>(1,097.7 to 1,428.5) | 1,262.6<br>(942.5 to 1,300.3)   | 1,022.8<br>(812.5 to 1,211.5)   |
| Niger                      | 2,110.2<br>(1,941.2 to 2,317.7) | 2,153.1<br>(1,999.9 to 2,342.1) | 2,165.9<br>(2,026.9 to 2,330.4) | 2,142.1<br>(2,006.1 to 2,291.4) | 1,952.7<br>(1,850.4 to 2,076.7) | 1,920.4<br>(1,809.7 to 2,044.9) | 1,757.2<br>(1,664.8 to 1,888.3) | 1,581.7<br>(1,502.4 to 1,719.9) | 1,455.2<br>(1,303.7 to 1,612.7) | 1,326.9<br>(1,142.6 to 1,572.6) |
| Nigeria                    | 1,801.1<br>(1,642.9 to 2,010.2) | 1,661.6<br>(1,516.9 to 1,841.2) | 1,555.6<br>(1,418.7 to 1,697.3) | 1,522.0<br>(1,388.3 to 1,660.6) | 1,583.3<br>(1,471.2 to 1,742.5) | 1,617.4<br>(1,470.7 to 1,780.7) | 1,600.5<br>(1,427.9 to 1,786.8) | 1,484.9<br>(1,306.2 to 1,638.7) | 1,256.7<br>(1,102.6 to 1,396.2) | 1,036.2<br>(869.4 to 1,173.6)   |
| Sao Tome and Principe      | 1,365.3<br>(1,296.9 to 1,445.9) | 1,237.3<br>(1,168.8 to 1,326.9) | 1,168.1<br>(1,107.8 to 1,231.1) | 1,191.6<br>(1,127.5 to 1,258.1) | 1,224.0<br>(1,120.9 to 1,354.8) | 1,224.0<br>(1,162.4 to 1,466.1) | 1,313.3<br>(1,238.7 to 1,436.7) | 1,224.6<br>(1,146.0 to 1,301.9) | 1,085.2<br>(1,003.4 to 1,172.4) | 967.6<br>(845.4 to 1,076.1)     |
| Senegal                    | 1,957.7<br>(1,842.7 to 2,085.6) | 1,892.7<br>(1,771.0 to 2,015.0) | 1,802.2<br>(1,655.3 to 1,892.0) | 1,661.8<br>(1,501.5 to 1,712.1) | 1,530.2<br>(1,432.7 to 1,647.4) | 1,530.2<br>(1,409.2 to 1,626.6) | 1,481.8<br>(1,368.2 to 1,603.7) | 1,399.3<br>(1,287.4 to 1,504.3) | 1,299.3<br>(1,233.9 to 1,390.3) | 1,209.3<br>(1,139.5 to 1,302.7) |
| Sierra Leone               | 1,977.9<br>(1,824.5 to 2,160.5) | 1,885.9<br>(1,746.7 to 2,049.4) | 1,885.9<br>(1,710.5 to 1,989.6) | 1,782.1<br>(1,671.8 to 1,922.9) | 1,711.3<br>(1,617.4 to 1,817.0) | 1,711.3<br>(1,662.5 to 1,861.3) | 1,805.2<br>(1,689.4 to 1,936.0) | 1,834.3<br>(1,691.5 to 1,982.2) | 1,757.1<br>(1,594.2 to 1,932.4) | 1,539.6<br>(1,355.1 to 1,713.1) |
| Togo                       | 1,745.2<br>(1,611.8 to 1,891.8) | 1,658.7<br>(1,526.8 to 1,812.0) | 1,592.9<br>(1,467.0 to 1,738.0) | 1,592.9<br>(1,471.0 to 1,728.6) | 1,576.0<br>(1,454.4 to 1,700.7) | 1,559.9<br>(1,419.8 to 1,687.4) | 1,610.1<br>(1,383.7 to 1,805.3) | 1,479.1<br>(1,368.5 to 1,802.0) | 1,301.4<br>(1,281.5 to 1,649.9) | 1,070.7<br>(1,138.1 to 1,420.2) |
| Eastern Sub-Saharan Africa | 2,239.9<br>(2,139.8 to 2,347.5) | 2,152.5<br>(2,058.4 to 2,258.6) | 2,068.1<br>(1,978.3 to 2,159.2) | 2,068.1<br>(1,993.4 to 2,128.1) | 2,054.2<br>(1,994.2 to 2,111.5) | 2,126.6<br>(2,059.3 to 2,194.0) | 2,117.3<br>(2,037.0 to 2,191.0) | 1,879.4<br>(1,799.4 to 1,960.8) | 1,681.9<br>(1,508.2 to 1,658.7) | 1,328.8<br>(1,242.3 to 1,402.0) |
| Burundi                    | 2,465.4<br>(2,401.9 to 2,851.1) | 2,596.7<br>(2,368.3 to 2,821.3) | 2,596.7<br>(2,323.0 to 2,834.8) | 2,596.7<br>(2,300.8 to 2,859.2) | 2,596.7<br>(2,238.5 to 2,816.5) | 2,596.7<br>(2,338.6 to 2,855.3) | 2,596.7<br>(2,308.9 to 2,782.9) | 2,596.7<br>(1,930.4 to 2,341.2) | 2,596.7<br>(1,591.6 to 1,649.9) | 2,596.7<br>(1,415.4 to 1,848.9) |
| Comoros                    | 2,005.4<br>(1,737.6 to 2,244.4) | 1,888.8<br>(1,633.8 to 2,132.0) | 1,812.7<br>(1,566.4 to 2,055.5) | 1,729.8<br>(1,507.2 to 1,944.9) | 1,639.4<br>(1,428.4 to 1,815.1) | 1,581.2<br>(1,413.1 to 1,722.0) | 1,497.4<br>(1,361.0 to 1,621.9) | 1,299.0<br>(1,150.6 to 1,438.7) | 1,205.6<br>(1,050.6 to 1,347.5) | 1,136.1<br>(954.7 to 1,257.6)   |
| Djibouti                   | 1,291.9<br>(1,205.7 to 1,406.1) | 1,245.5<br>(1,161.4 to 1,352.0) | 1,244.7<br>(1,154.0 to 1,353.8) | 1,245.3<br>(1,164.6 to 1,357.3) | 1,222.8<br>(1,159.9 to 1,315.9) | 1,238.8<br>(1,151.6 to 1,344.4) | 1,260.7<br>(1,095.6 to 1,451.9) | 1,258.7<br>(1,054.9 to 1,503.6) | 1,201.3<br>(988.7 to 1,437.6)   | 1,070.7<br>(859.9 to 1,267.6)   |
| Eritrea                    | 2,575.6<br>(2,381.5 to 2,785.4) | 2,464.1<br>(2,289.5 to 2,674.9) | 2,373.3<br>(2,217.5 to 2,552.6) | 2,302.6<br>(2,148.5 to 2,462.0) | 2,170.6<br>(2,017.0 to 2,323.6) | 1,893.4<br>(1,740.4 to 2,063.7) | 1,746.6<br>(1,589.9 to 1,914.4) | 1,645.6<br>(1,473.6 to 1,823.2) | 1,594.8<br>(1,411.8 to 1,765.7) | 1,475.1<br>(1,294.9 to 1,633.9) |
| Ethiopia                   | 2,775.6<br>(2,451.0 to 3,146.3) | 2,775.6<br>(2,466.4 to 3,141.2) | 2,775.6<br>(2,427.9 to 3,001.0) | 2,775.6<br>(2,405.0 to 2,851.3) | 2,775.6<br>(2,362.6 to 2,709.1) | 2,775.6<br>(2,271.0 to 2,574.0) | 2,775.6<br>(2,130.0 to 2,501.2) | 2,775.6<br>(1,796.8 to 2,171.2) | 2,775.6<br>(1,393.2 to 1,779.7) | 2,775.6<br>(1,132.7 to 1,527.4) |
| Kenya                      | 1,643.0<br>(1,581.6 to 1,701.5) | 1,533.9<br>(1,474.2 to 1,592.7) | 1,432.5<br>(1,376.8 to 1,487.4) | 1,380.9<br>(1,329.3 to 1,435.6) | 1,412.4<br>(1,361.3 to 1,465.0) | 1,412.4<br>(1,546.9 to 1,692.5) | 1,618.8<br>(1,681.9 to 1,821.8) | 1,616.1<br>(1,558.7 to 1,675.8) | 1,298.6<br>(1,242.8 to 1,356.6) | 1,063.2<br>(1,007.1 to 1,116.5) |
| Madagascar                 | 2,346.1<br>(2,165.5 to 2,522.8) | 2,044.6<br>(1,866.3 to 2,216.0) | 1,837.0<br>(1,597.1 to 1,961.4) | 1,772.9<br>(1,674.0 to 1,990.9) | 1,772.9<br>(1,643.4 to 1,914.6) | 1,772.9<br>(1,589.2 to 1,853.3) | 1,668.2<br>(1,522.5 to 1,805.0) | 1,565.4<br>(1,385.2 to 1,739.0) | 1,399.0<br>(1,236.0 to 1,712.6) | 1,116.5<br>(1,058.5 to 1,685.9) |
| Malawi                     | 2,264.9<br>(2,101.0 to 2,459.6) | 2,074.5<br>(1,927.1 to 2,231.4) | 1,897.4<br>(1,783.9 to 2,025.1) | 1,897.4<br>(1,768.6 to 2,039.3) | 2,044.9<br>(1,823.8 to 2,292.7) | 2,044.9<br>(1,980.8 to 2,750.4) | 2,380.5<br>(2,040.5 to 3,040.6) | 2,309.8<br>(1,833.0 to 2,793.4) | 1,812.1<br>(1,495.5 to 2,123.5) | 1,398.4<br>(1,119.5 to 1,657.3) |
| Mozambique                 | 2,072.6<br>(1,915.0 to 2,259.1) | 1,961.1<br>(1,796.5 to 2,054.0) | 1,916.0<br>(1,796.5 to 2,054.0) | 2,210.5<br>(2,036.2 to 2,378.1) | 1,820.0<br>(1,720.0 to 1,933.9) | 1,797.0<br>(1,638.6 to 1,946.6) | 1,804.2<br>(1,553.5 to 2,066.6) | 1,725.2<br>(1,473.8 to 2,053.9) | 1,606.7<br>(1,376.4 to 1,906.9) | 1,319.2<br>(1,129.1 to 1,543.1) |
| Rwanda                     | 2,274.2<br>(2,074.4 to 2,641.2) | 2,297.7<br>(2,029.9 to 2,542.3) | 2,172.1<br>(1,912.1 to 2,398.0) | 2,077.1<br>(1,875.1 to 2,257.3) | 2,325.8<br>(2,139.3 to 2,523.6) | 2,272.9<br>(2,366.5 to 2,769.9) | 2,203.5<br>(2,009.8 to 2,390.9) | 1,546.6<br>(1,384.1 to 1,743.2) | 1,193.2<br>(1,033.4 to 1,358.2) | 1,065.1<br>(908.4 to 1,214.1)   |
| Somalia                    | 2,066.0<br>(2,066.0 to 2,500.0) | 2,380.0<br>(2,174.4 to 2,619.9) | 2,204.5<br>(2,033.5 to 2,426.4) | 2,265.4<br>(2,082.1 to 2,489.5) | 2,261.2<br>(2,066.5 to 2,479.0) | 2,272.9<br>(2,059.6 to 2,479.5) | 2,269.3<br>(2,061.7 to 2,468.0) | 2,163.4<br>(1,968.1 to 2,375.7) | 1,272.4<br>(1,066.4 to 2,397.5) | 1,943.5<br>(1,761.7 to 2,164.6) |
| South Sudan                | 1,905.5<br>(1,686.8 to 2,155.4) | 1,834.1<br>(1,656.7 to 2,072.2) | 1,789.8<br>(1,606.7 to 2,006.5) | 1,808.8<br>(1,628.1 to 2,017.6) | 1,836.6<br>(1,626.0 to 2,050.9) | 1,836.6<br>(1,586.8 to 2,072.0) | 1,800.0<br>(1,511.0 to 2,067.3) | 1,713.2<br>(1,408.3 to 1,996.4) | 1,615.3<br>(1,324.1 to 1,904.1) | 1,555.2<br>(1,284.4 to 1,809.5) |
| Tanzania                   | 1,815.1<br>(1,666.0 to 1,981.8) | 1,690.1<br>(1,549.6 to 1,869.6) | 1,587.9<br>(1,464.2 to 1,746.2) | 1,588.9<br>(1,467.0 to 1,735.6) | 1,743.6<br>(1,603.0 to 1,877.9) | 1,920.4<br>(1,690.9 to 2,103.2) | 1,965.1<br>(1,670.1 to 2,187.3) | 1,790.9<br>(1,507.2 to 2,024.4) | 1,537.8<br>(1,274.2 to 1,711.5) | 1,250.9<br>(1,043.4 to 1,385.9) |
| Uganda                     | 2,144.4<br>(1,984.9 to 2,278.2) | 2,071.3<br>(1,915.2 to 2,202.4) | 2,131.4<br>(1,984.4 to 2,275.1) | 2,077.3<br>(1,939.7 to 2,201.1) | 2,146.4<br>(1,987.4 to 2,304.5) | 2,146.4<br>(2,044.5 to 2,568.0) | 2,249.0<br>(2,034.1 to 2,471.7) | 1,973.7<br>(1,803.4 to 2,134.4) | 1,680.2<br>(1,479.3 to 1,830.6) | 1,341.1<br>(1,139.9 to 1,502.5) |
| Zambia                     | 1,688.8<br>(1,362.0 to 2,148.4) | 1,581.9<br>(1,319.2 to 1,956.6) | 1,581.9<br>(1,363.2 to 1,867.5) | 1,688.8<br>(1,491.7 to 1,919.3) | 1,688.8<br>(1,750.0 to 2,255.4) | 1,688.8<br>(2,353.8 to 2,980.1) | 1,688.8<br>(2,607.4 to 3,355.1) | 1,688.8<br>(2,295.5 to 3,128.8) | 1,688.8<br>(1,755.5 to 2,478.9) | 1,688.8<br>(1,106.8 to 1,936.8) |
| Central Sub-Saharan Africa | 2,073.6<br>(1,937.5 to 2,211.7) | 1,997.1<br>(1,862.8 to 2,123.1) | 1,956.7<br>(1,847.8 to 2,067.7) | 1,892.0<br>(1,791.1 to 1,996.7) | 1,903.5<br>(1,804.2 to 2,001.3) | 1,977.8<br>(1,854.9 to 2,060.3) | 1,891.6<br>(1,860.8 to 2,083.1) | 1,891.6<br>(1,789.5 to 1,991.6) | 1,748.1<br>(1,645.7 to 1,844.5) | 1,489.9<br>(1,398.6 to 1,576.9) |
| Angola                     | 1,889.8<br>(1,659.8 to 2,312.5) | 1,938.0<br>(1,619.1 to 2,240.9) | 1,948.1<br>(1,653.8 to 2,245.8) | 1,982.2<br>(1,669.0 to 2,270.6) | 2,075.9<br>(1,735.5 to 2,376.7) | 2,100.8<br>(1,736.2 to 2,446.1) | 2,047.9<br>(1,702.3 to 2,387.7) | 1,879.5<br>(1,538.2 to 2,222.8) | 1,626.2<br>(1,318.5 to 1,961.8) | 1,349.0<br>(1,098.6 to 1,683.7) |
| Central African Republic   | 2,278.7<br>(1,927.9 to 2,622.3) | 2,237.5<br>(1,921.9 to 2,530.9) | 2,139.8<br>(1,873.4 to 2,360.4) | 2,                              |                                 |                                 |                                 |                                 |                                 |                                 |
